# Supplementary material for: A Double-Barrel Liquid Chromatography-Tandem Mass Spectrometry (LC-MS/MS) System to Quantify 96 Interactomes per Day
Source: PubMed Central journal article supplement (PMC4587330; doi:10.1074/mcp.o115.049460), 2015-04-17

Raw file: 20140827\_EXQ00\_FaHo\_SA\_ADA2\_01  
 Scan: 2984 Method: FTMS; HCD Score: 155.42 m/z: 505.25 Gene names: RPL17A;RPL17B

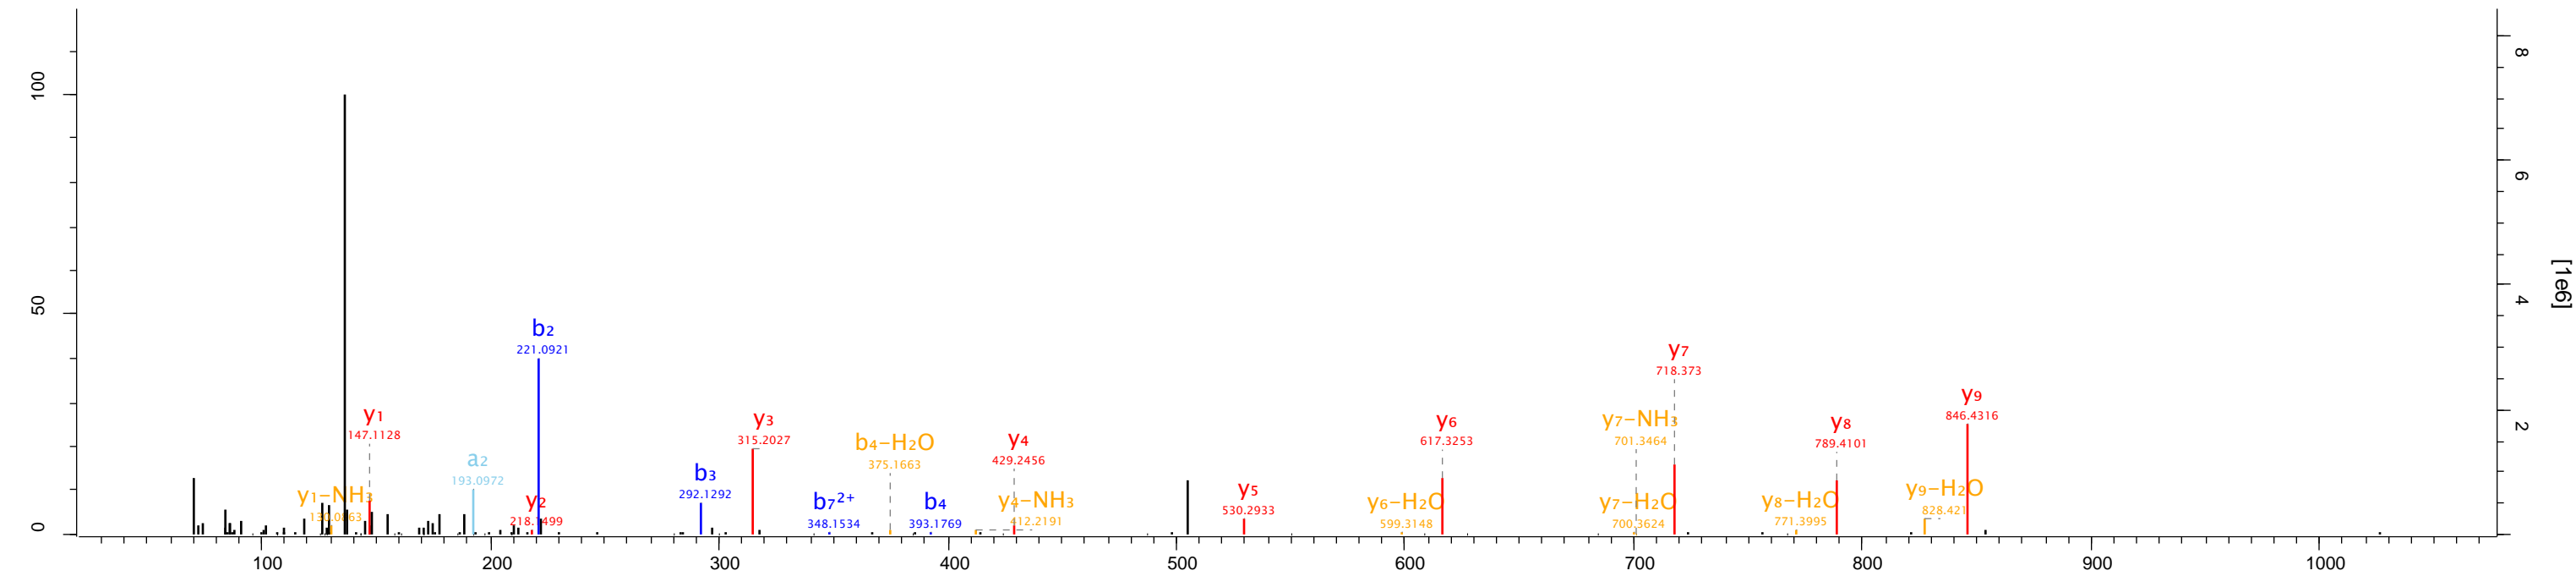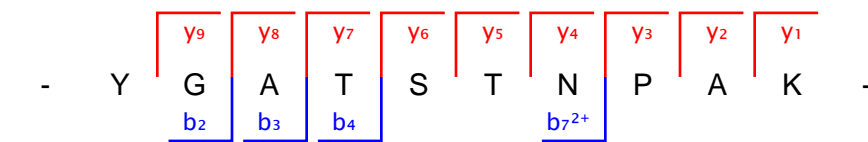

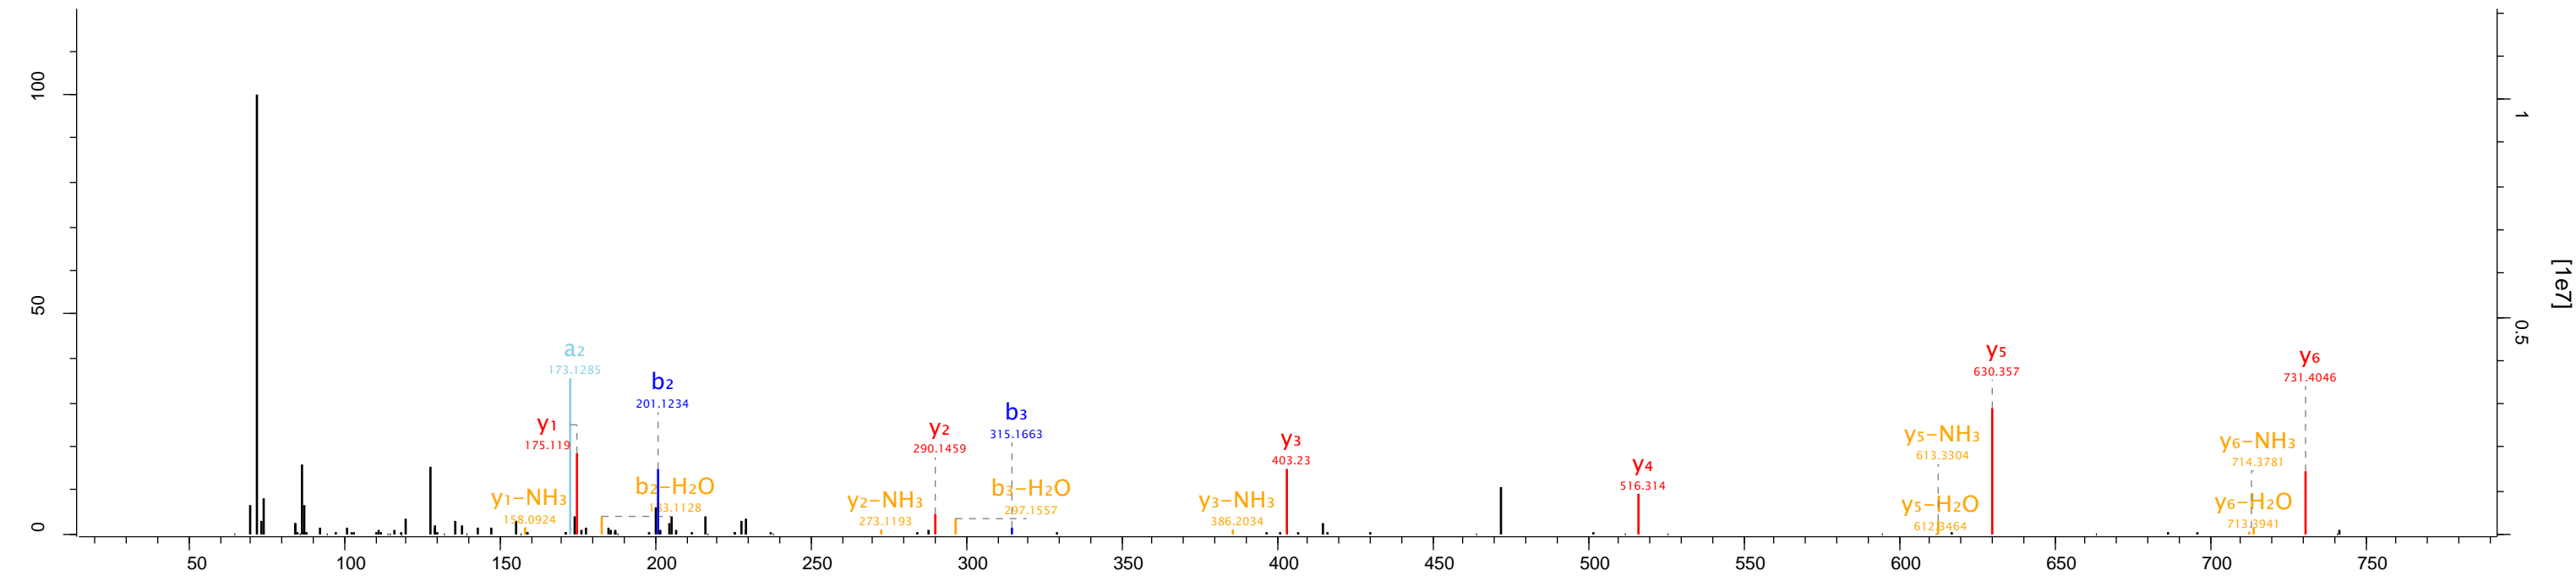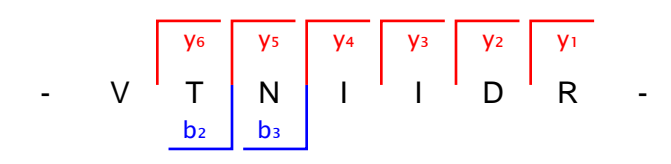

Raw file  
20140827\_EXQ00\_FaHo\_SA\_ADA2\_02

Scan 6574 Method FTMS; HCD Score 86.01 m/z 656.33 Gene names AHC2

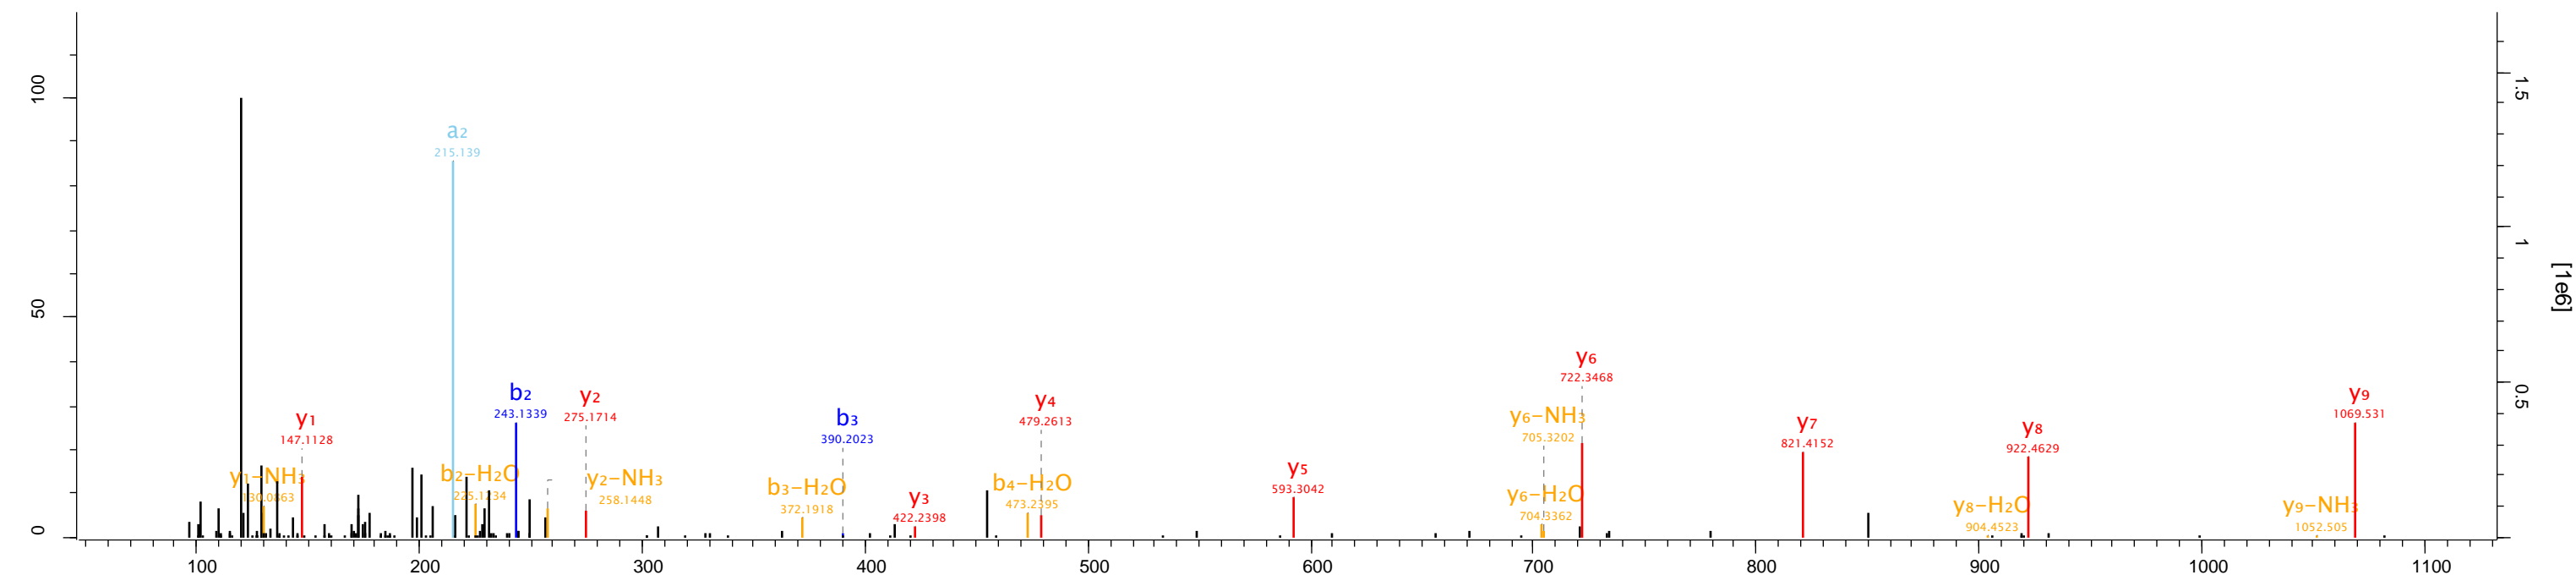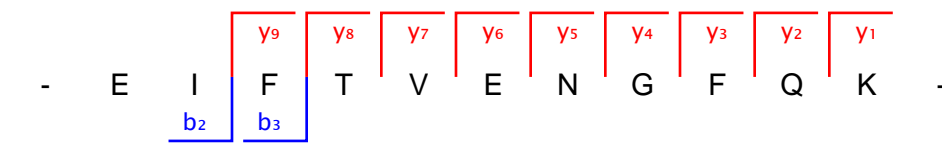

Raw file: 20140827\_EXQ00\_FaHo\_SA\_ADA2\_02  
 Scan: 7158 Method: FTMS; HCD Score: 156.96 m/z: 885.94 Gene names: UBP8

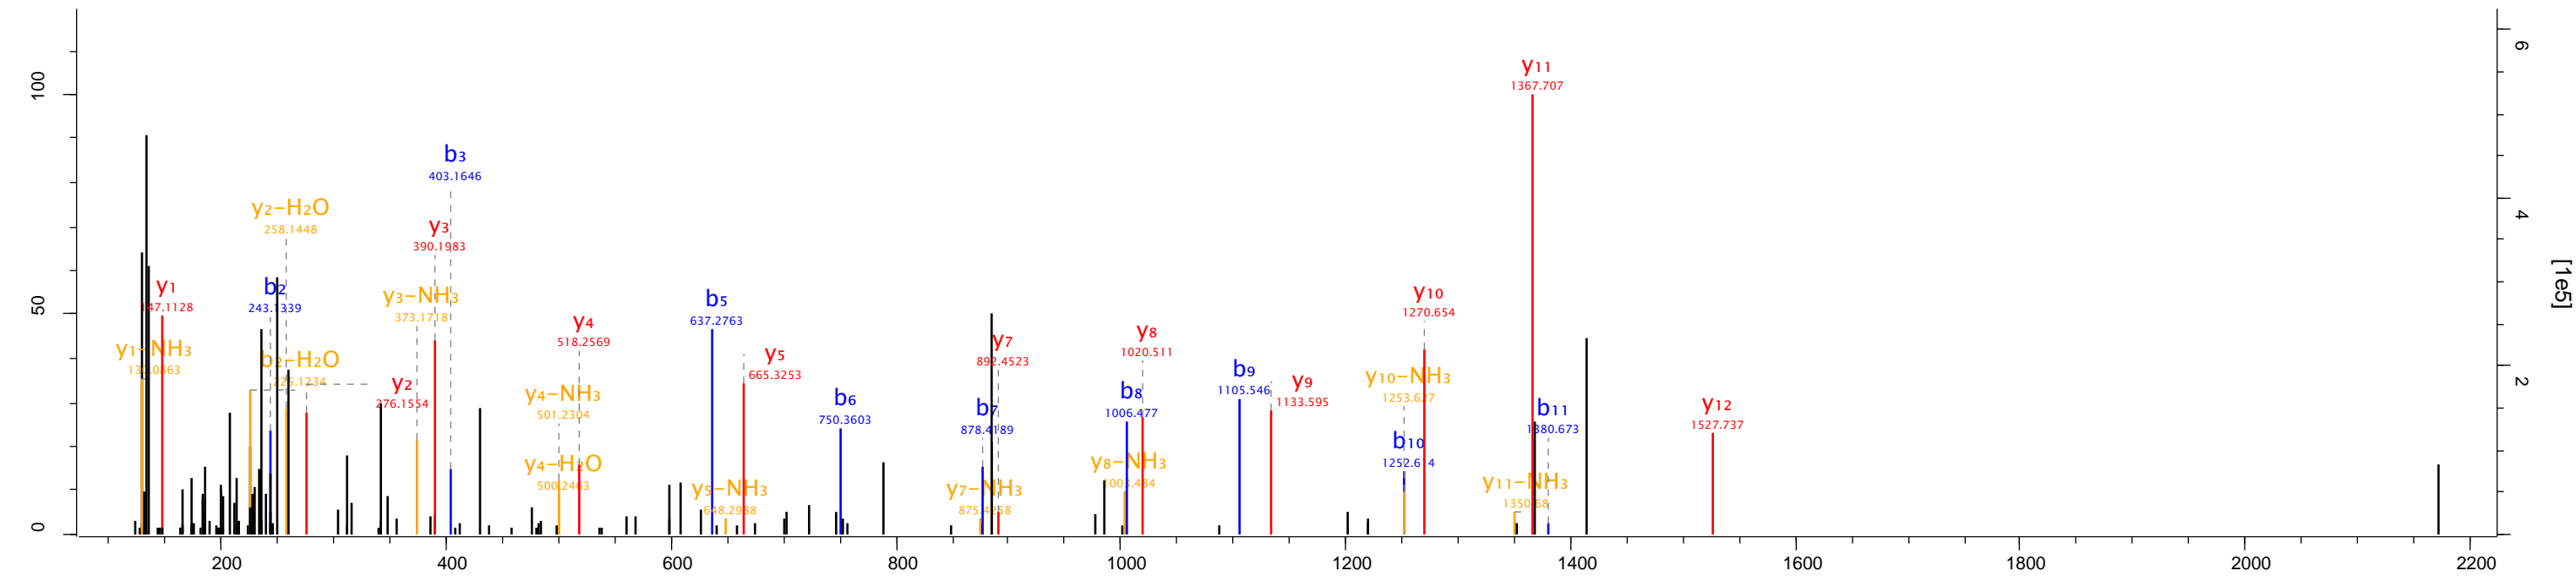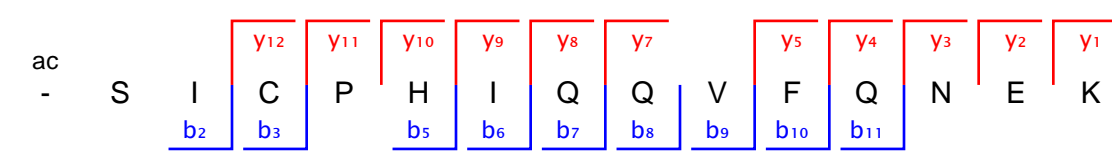

Raw file 20140827\_EXQ00\_FaHo\_SA\_BDF1\_01 Scan 3311 Method FTMS; HCD Score 180.97 m/z 662.32 Gene names RPL7A;RPL7B

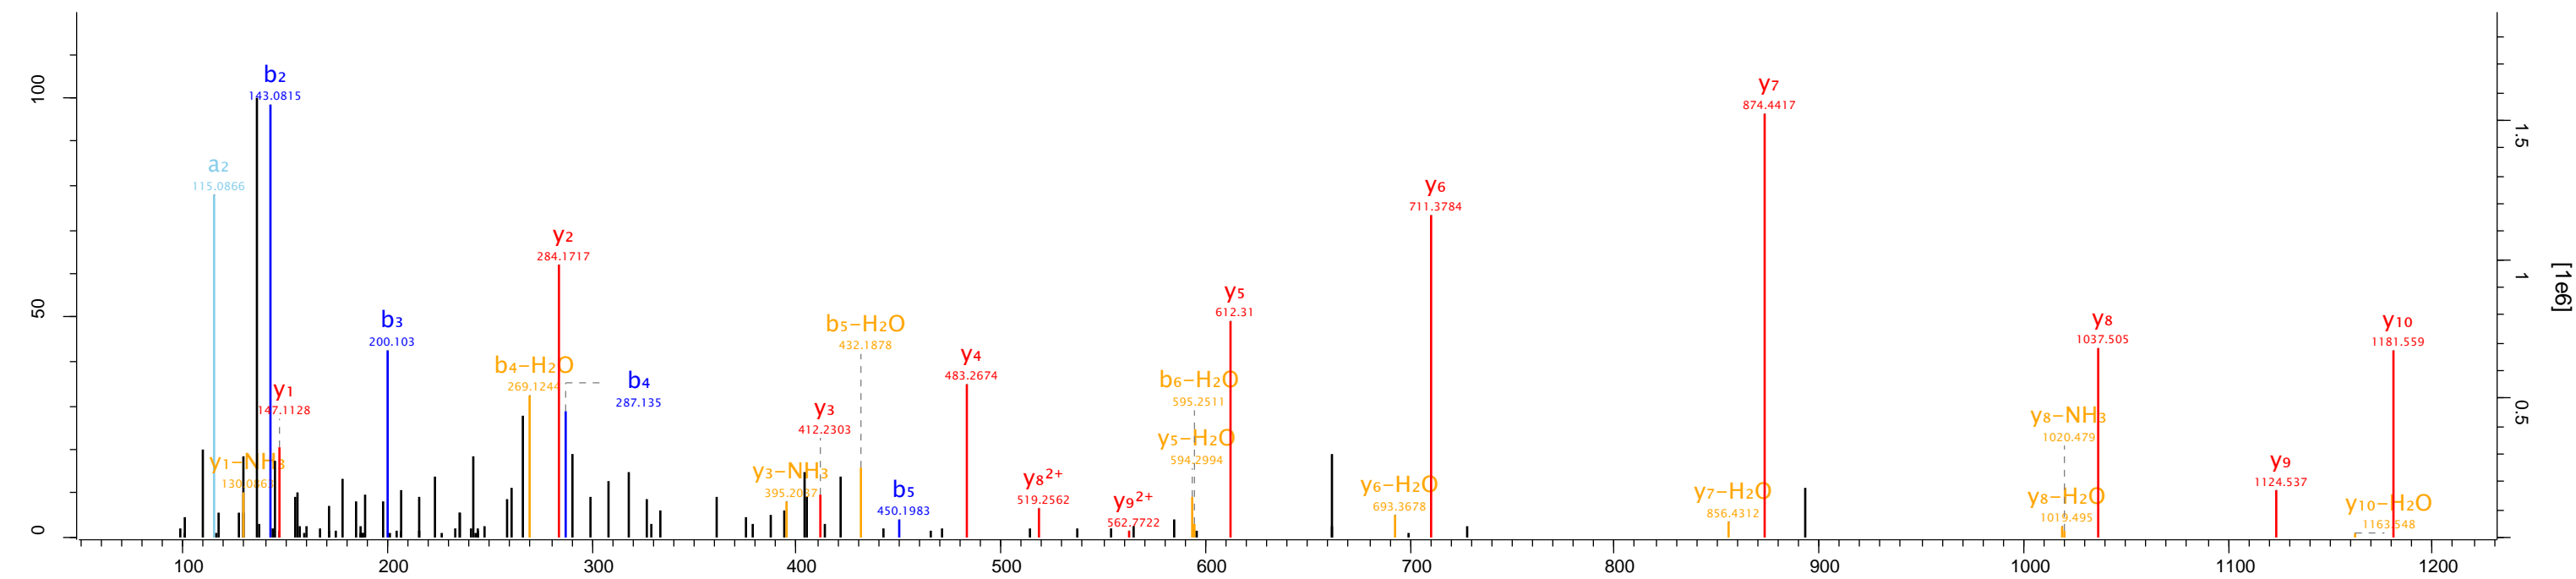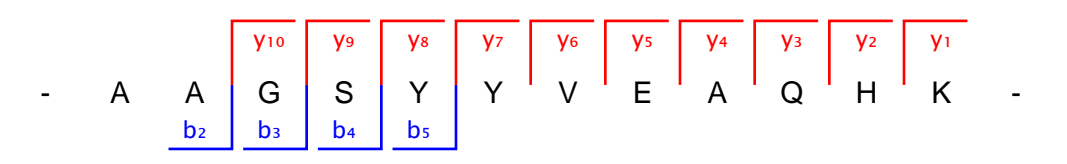

Raw file

20140827\_EXQ00\_FaHo\_SA\_BDF1\_01

Scan

4316

Method

FTMS; HCD

Score

27.22

m/z

640.31

Gene names

TY1B-LR3;TY1B-OL;TY1B-LR4;TY1B-LR2;TY1B-PL;TY1B-ER1;TY1B-PR3;TY1B-GR2;TY1B-MR2;TY1B-OR;TY1B-DR1;TY1B-A

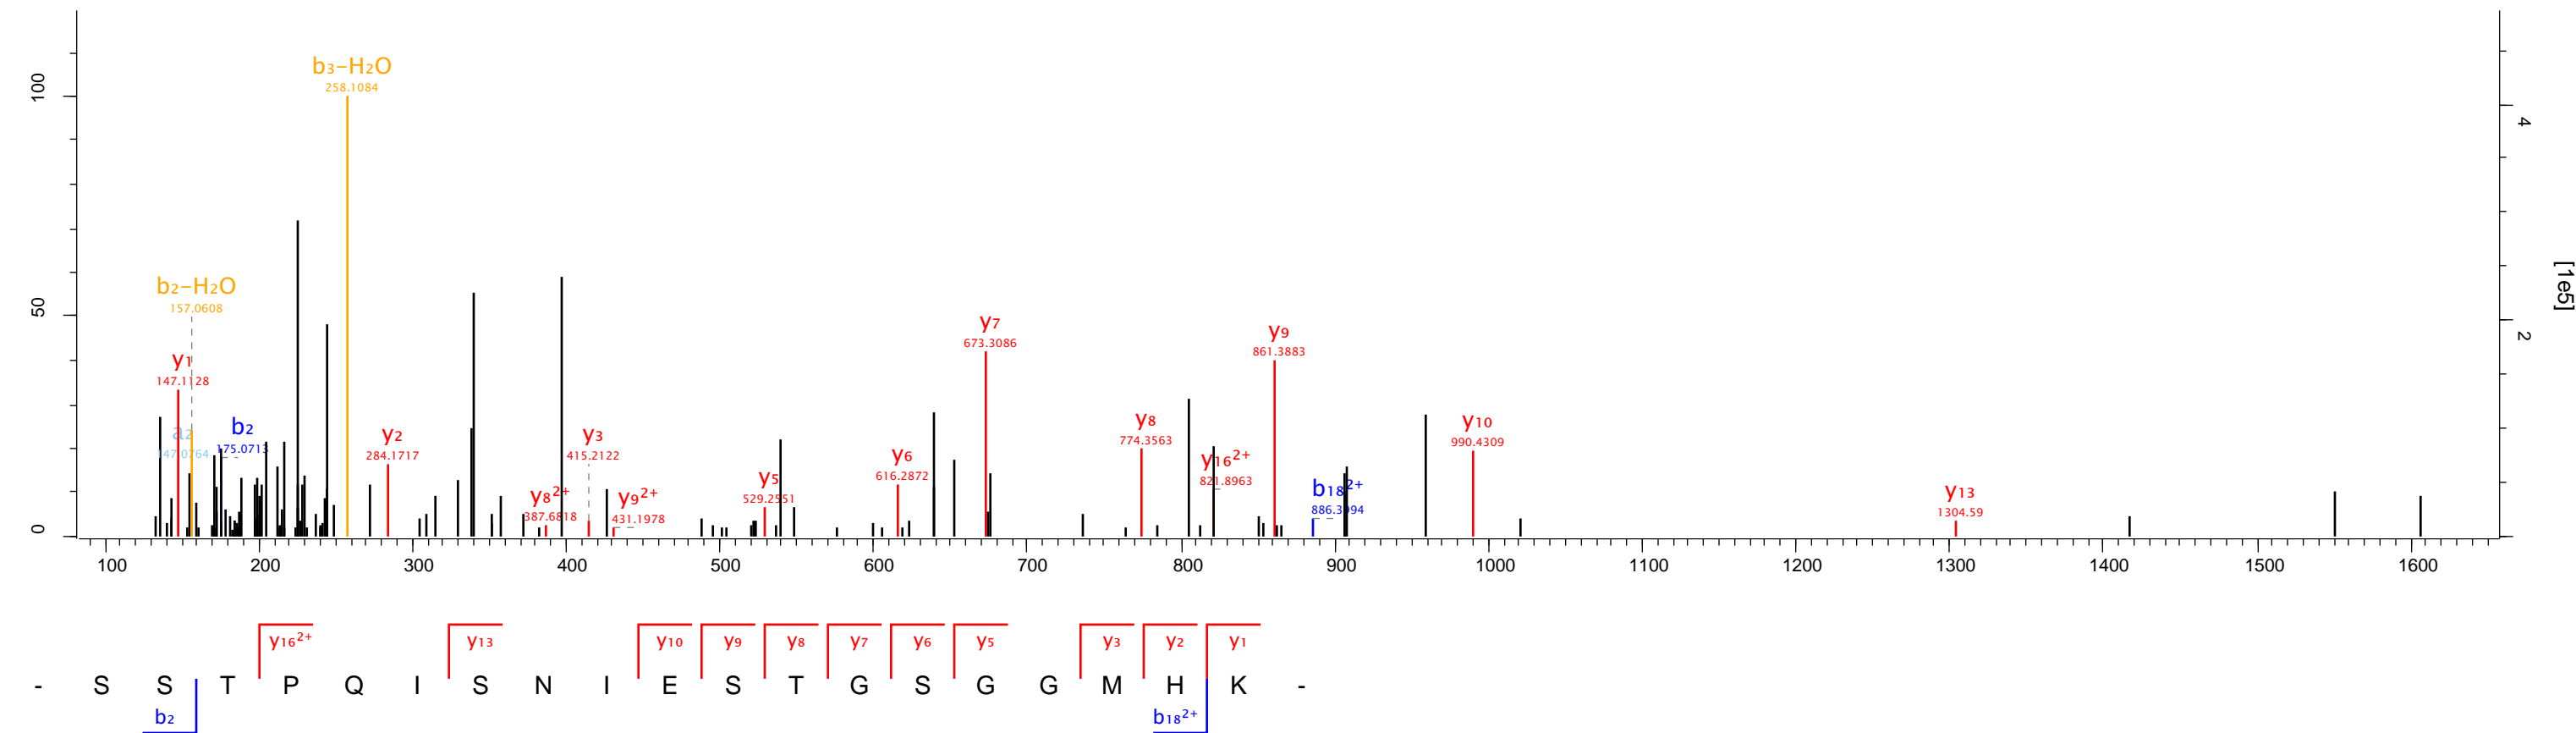

Raw file: 20140827\_EXQ00\_FaHo\_SA\_BDF1\_01  
 Scan: 5409 Method: FTMS; HCD Score: 119.21 m/z: 443.77 Gene names: RPL36A;RPL36B

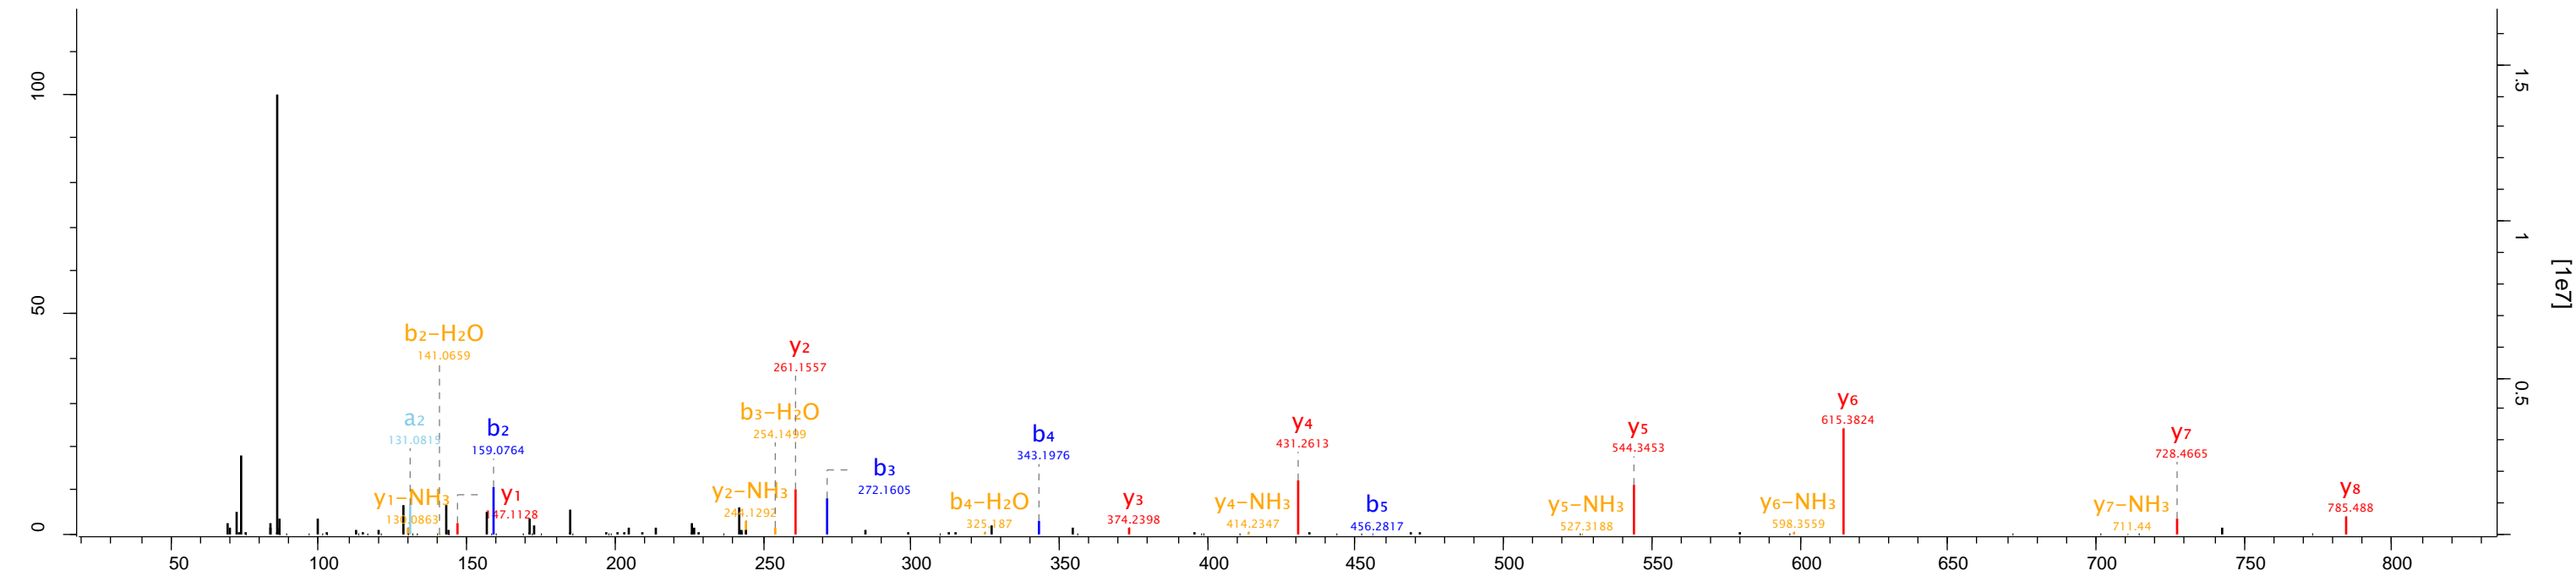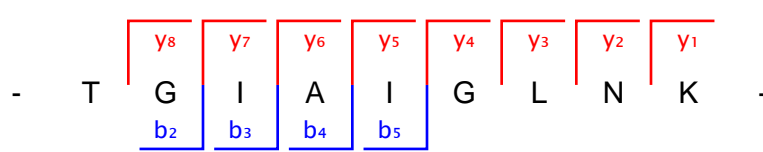

Raw file 20140827\_EXQ00\_FaHo\_SA\_BDF1\_01 Scan 7042 Method FTMS; HCD Score 67.25 m/z 614.35 Gene names FPR4

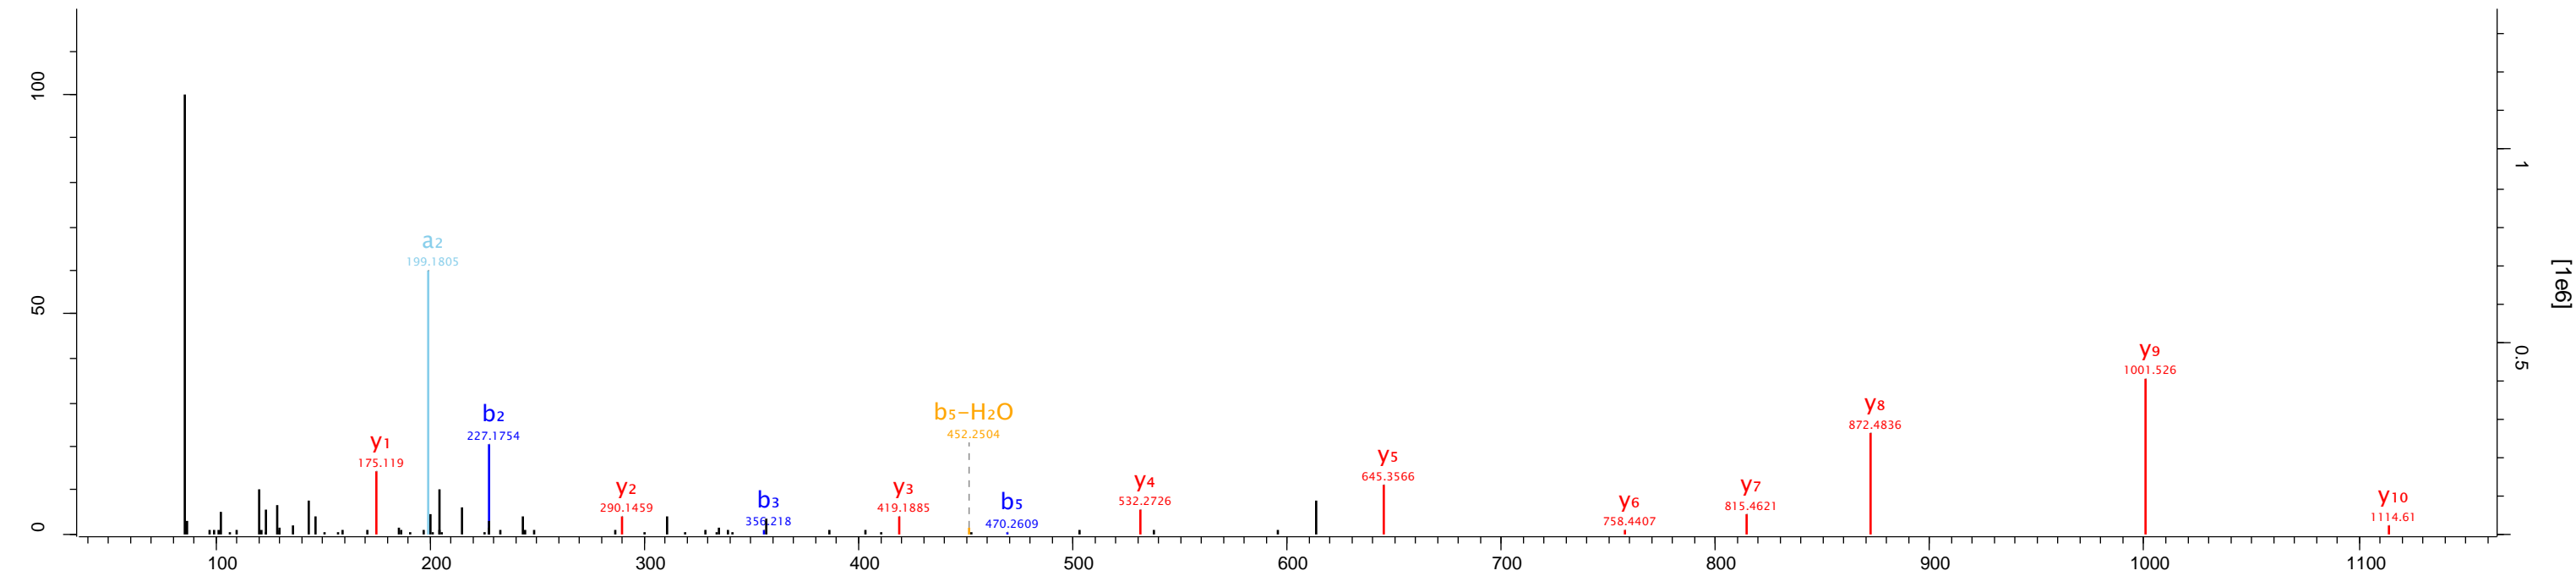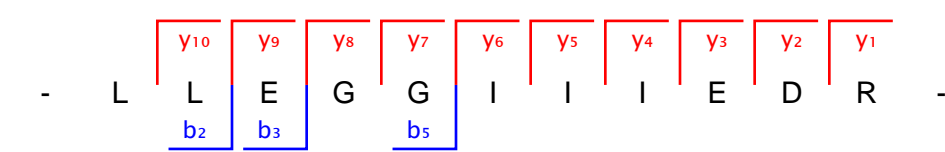



Raw file 20140827\_EXQ00\_FaHo\_SA\_BDF1\_01 Scan 7830 Method FTMS; HCD Score 72.9 m/z 731.38 Gene names TOP2

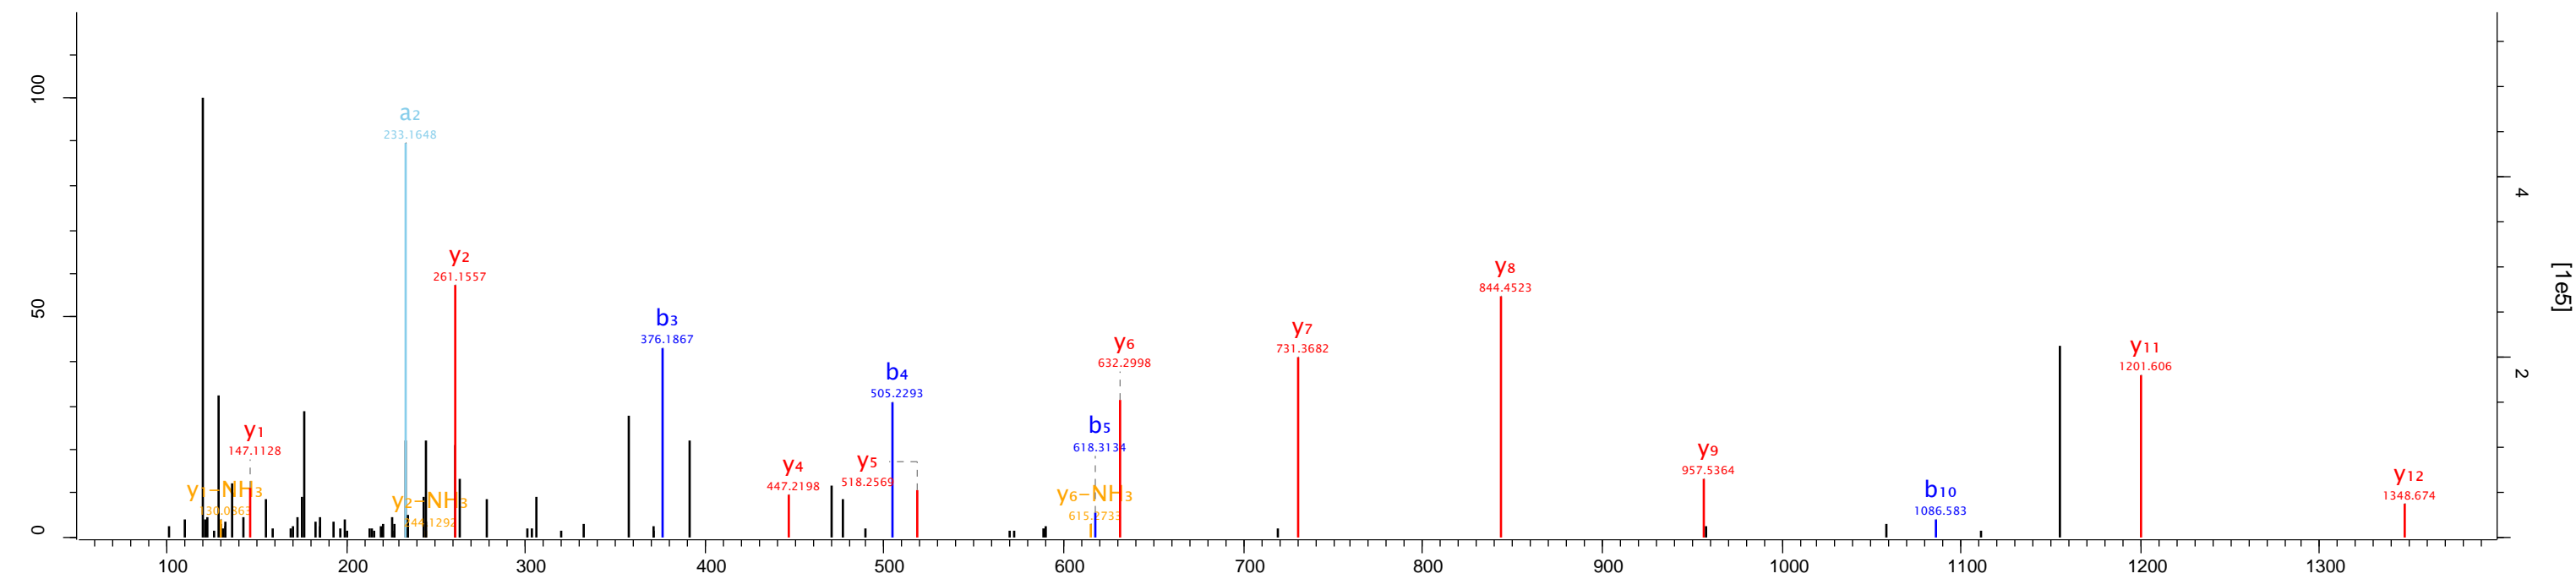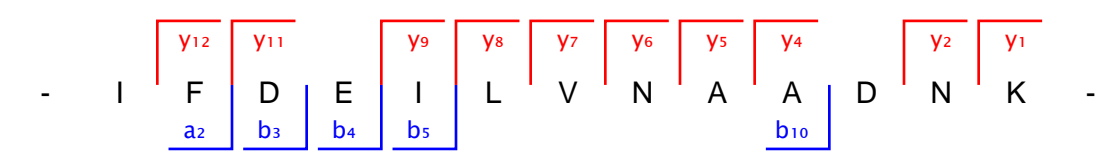

Raw file 20140827\_EXQ00\_FaHo\_SA\_BDF1\_01 Scan 8367 Method FTMS; HCD Score 93.23 m/z 900.48 Gene names FPR4;FPR3

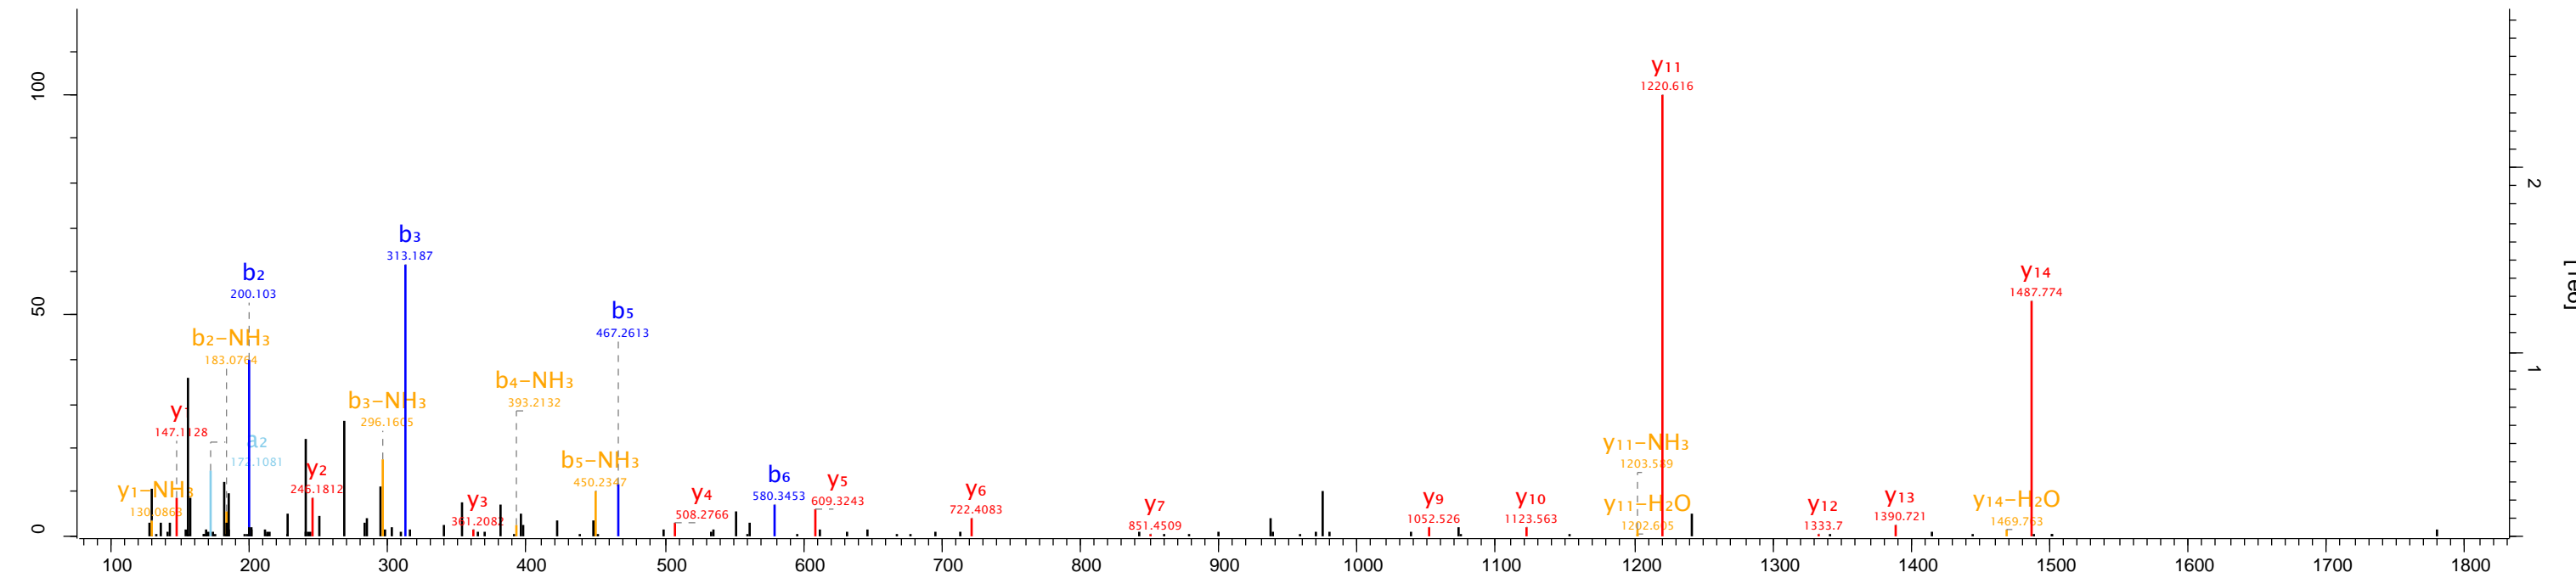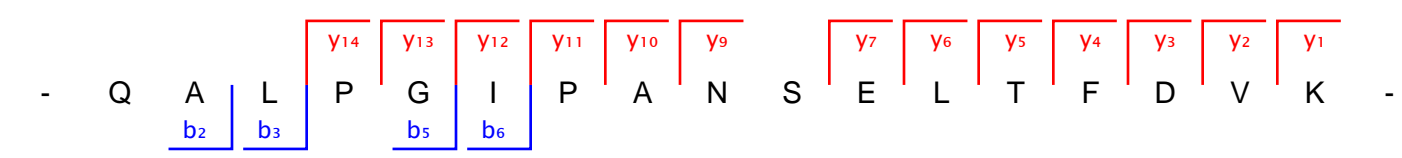

Raw file  
20140827\_EXQ00\_FaHo\_SA\_BDF1\_02

Scan Method Score m/z Gene names  
3249 FTMS; HCD 105.98 494.76 RPL7B

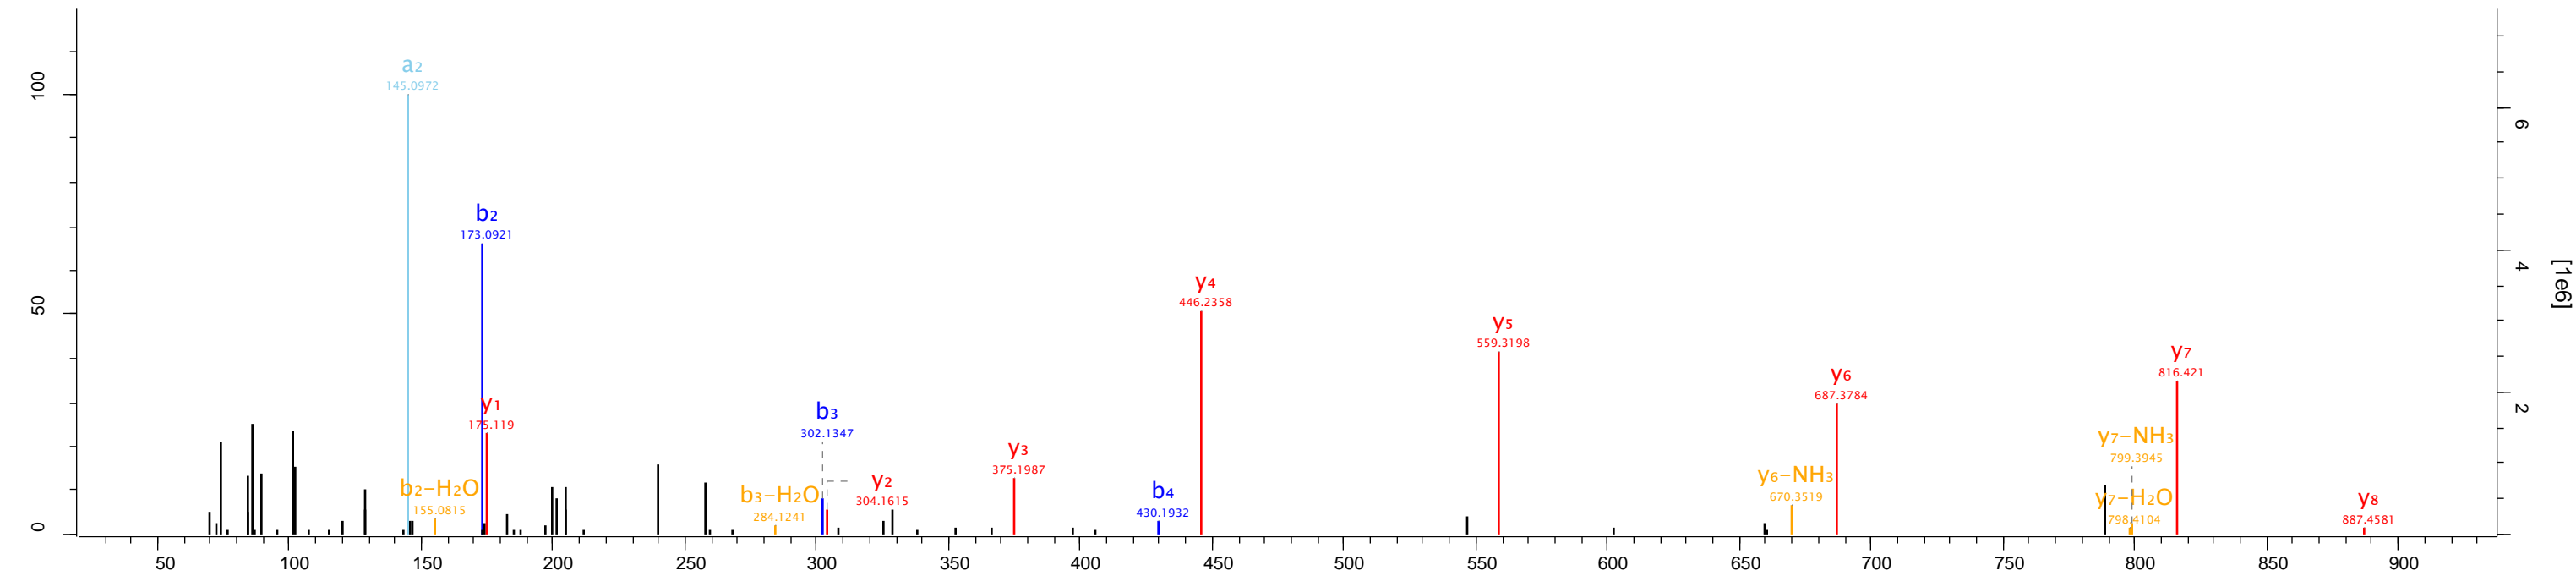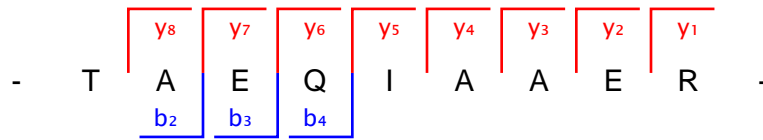

Raw file: 20140827\_EXQ00\_FaHo\_SA\_BDF1\_02  
 Scan: 3922 Method: FTMS; HCD Score: 66.02 m/z: 663.31 Gene names: TY1B-LR4

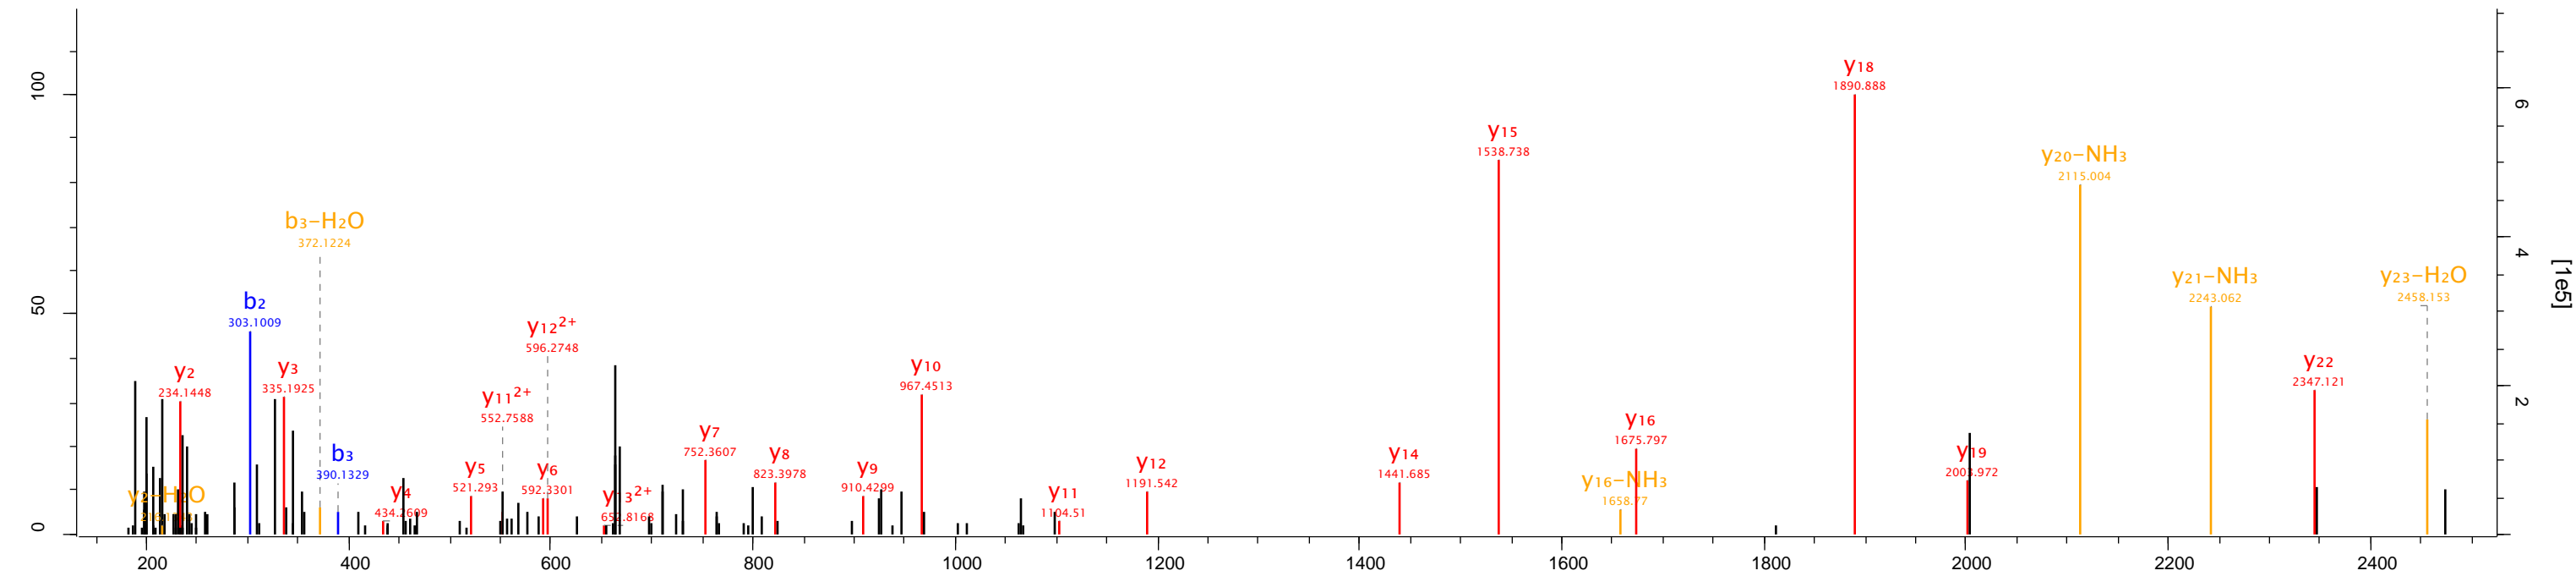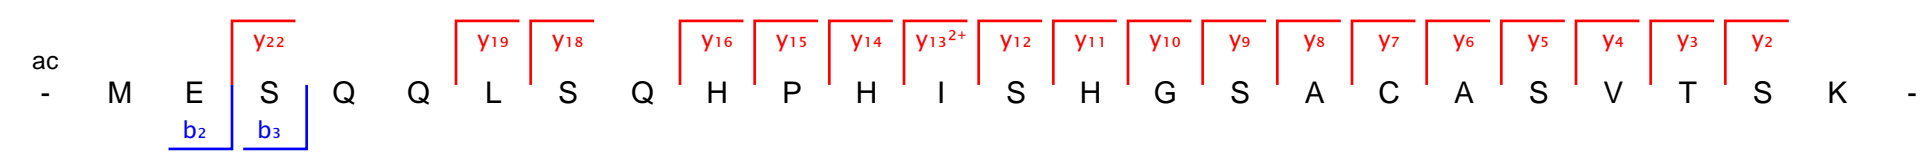

Raw file 20140827\_EXQ00\_FaHo\_SA\_BDF1\_02 Scan 4559 Method FTMS; HCD Score 188.48 m/z 748.91 Gene names RPL17A;RPL17B

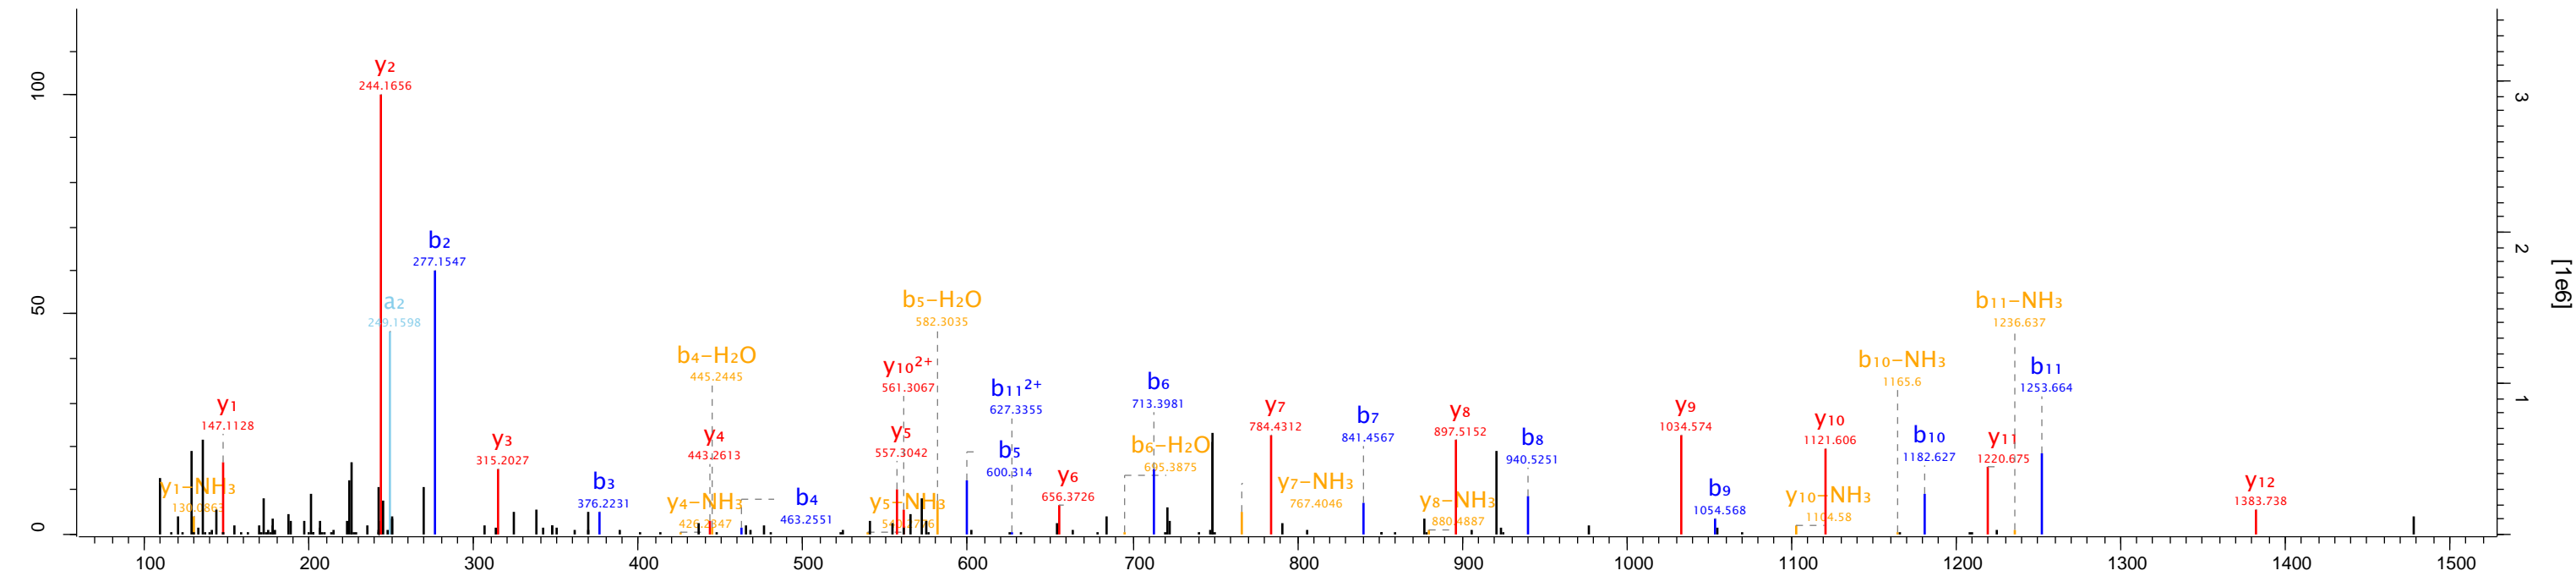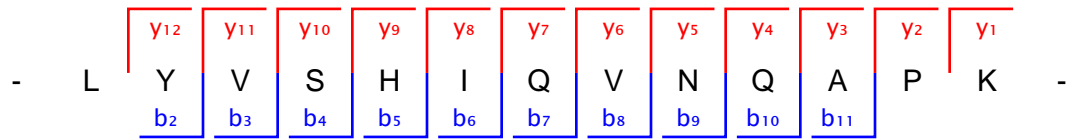

Raw file 20140827\_EXQ00\_FaHo\_SA\_BDF1\_03 Scan 2631 Method FTMS; HCD Score 128.86 m/z 366.7 Gene names RPS0A

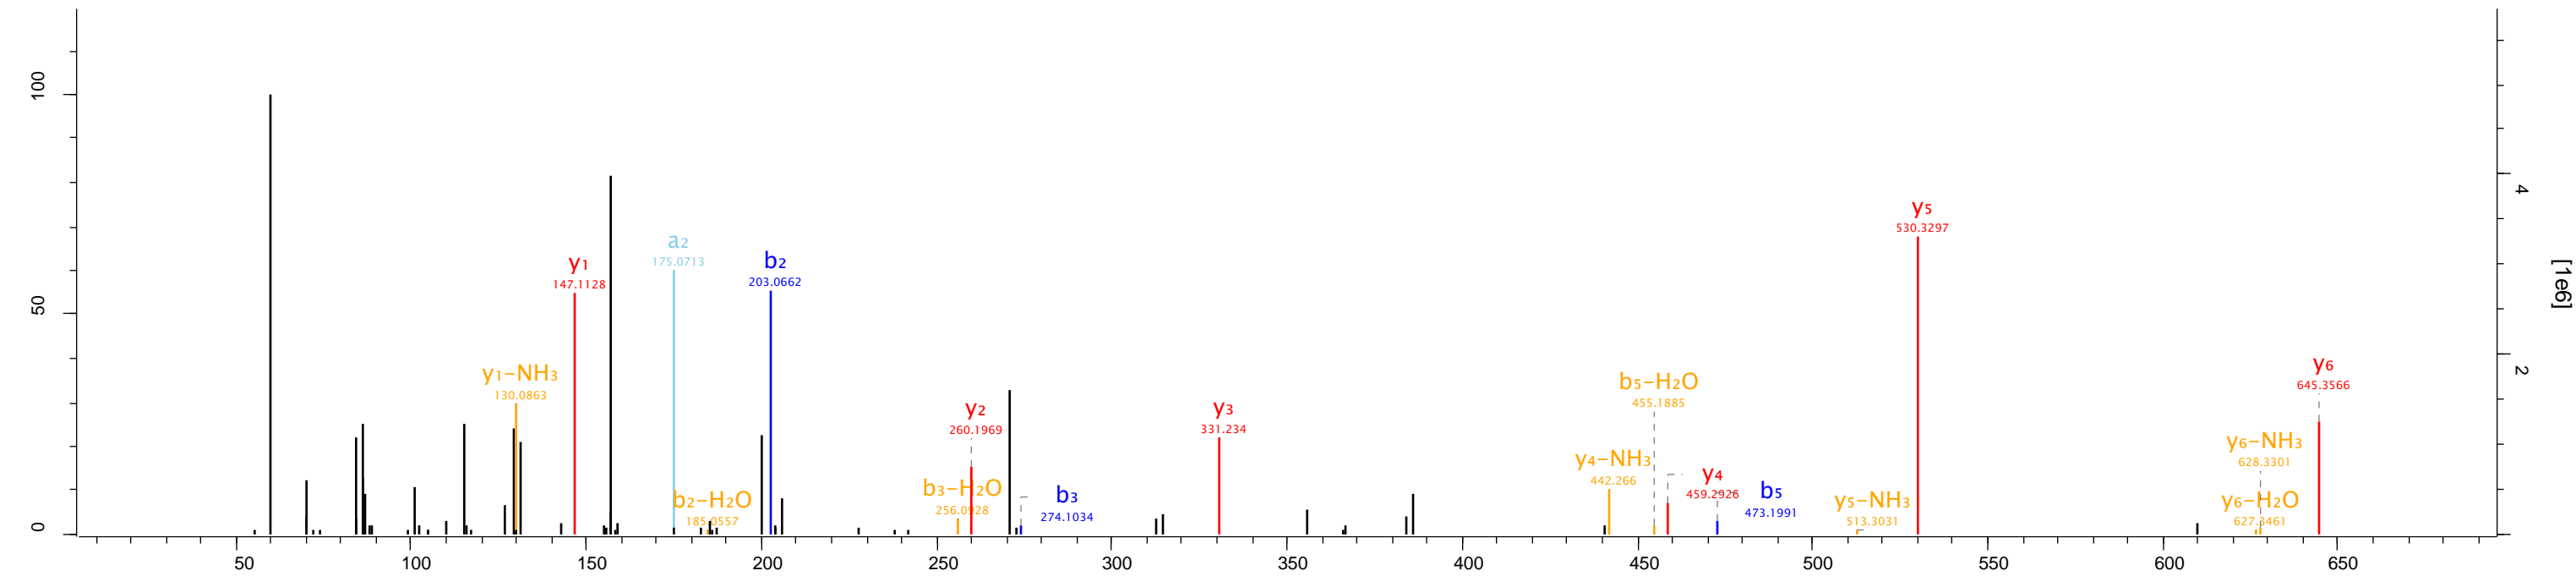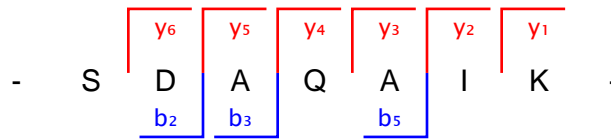

Raw file 20140827\_EXQ00\_FaHo\_SA\_BDF1\_03 Scan 3754 Method FTMS; HCD Score 144.65 m/z 505.78 Gene names RPL4B;RPL4A

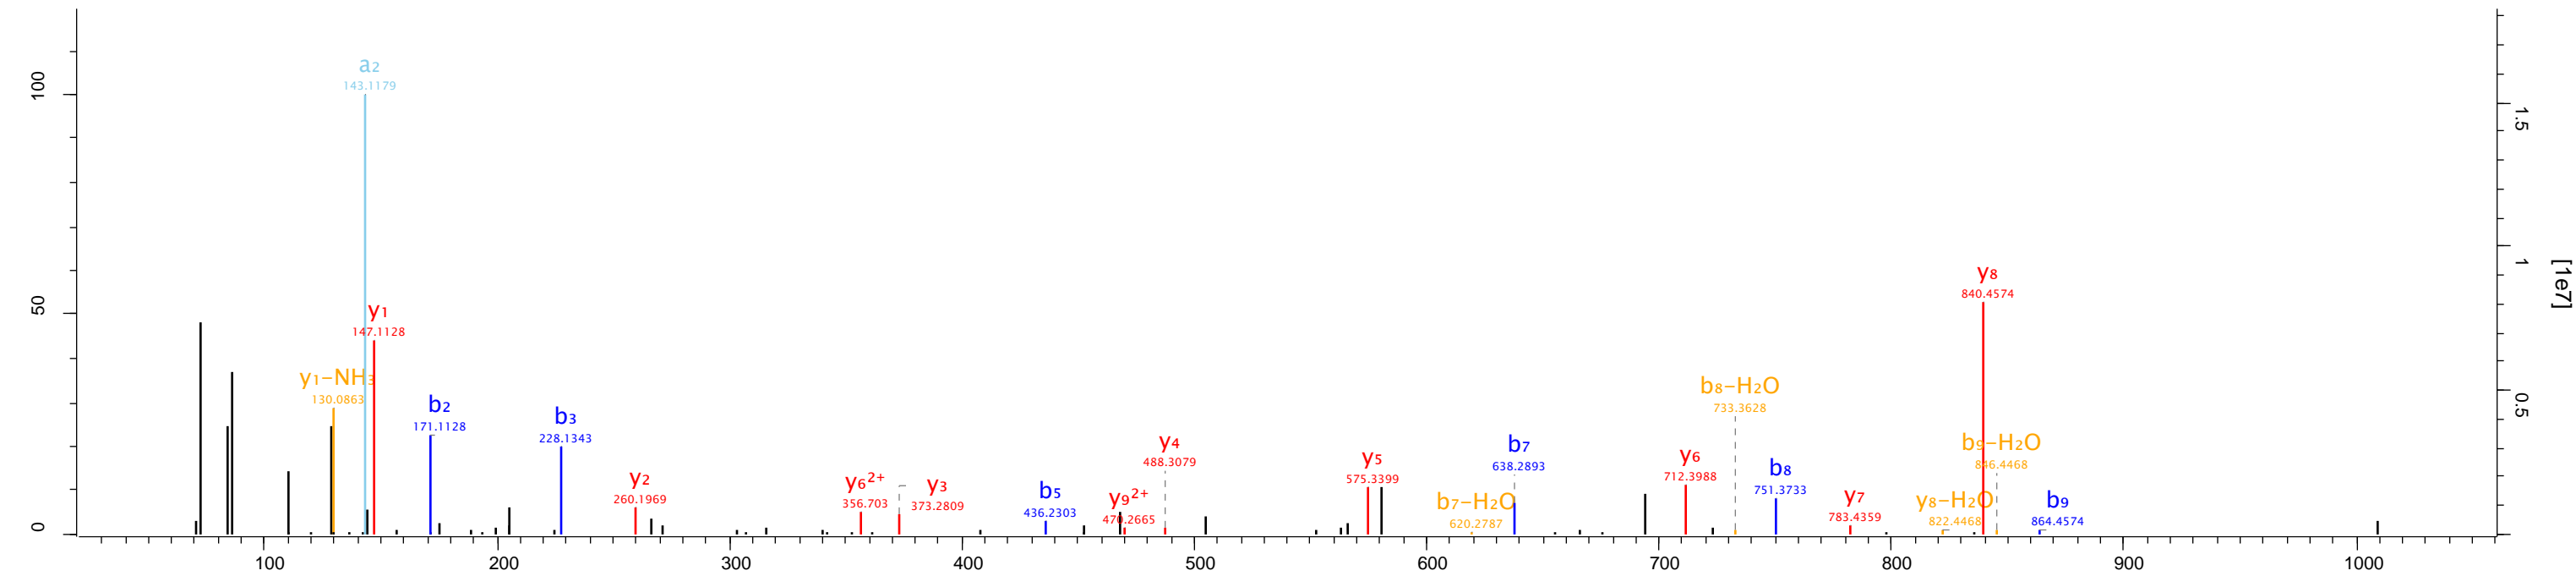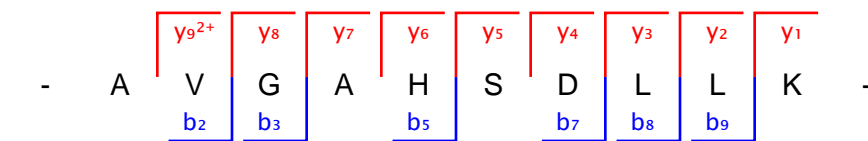

Raw file: 20140827\_EXQ00\_FaHo\_SA\_BDF1\_03  
 Scan: 5978 Method: FTMS; HCD Score: 131.06 m/z: 673.84 Gene names: RPL36A;RPL36B

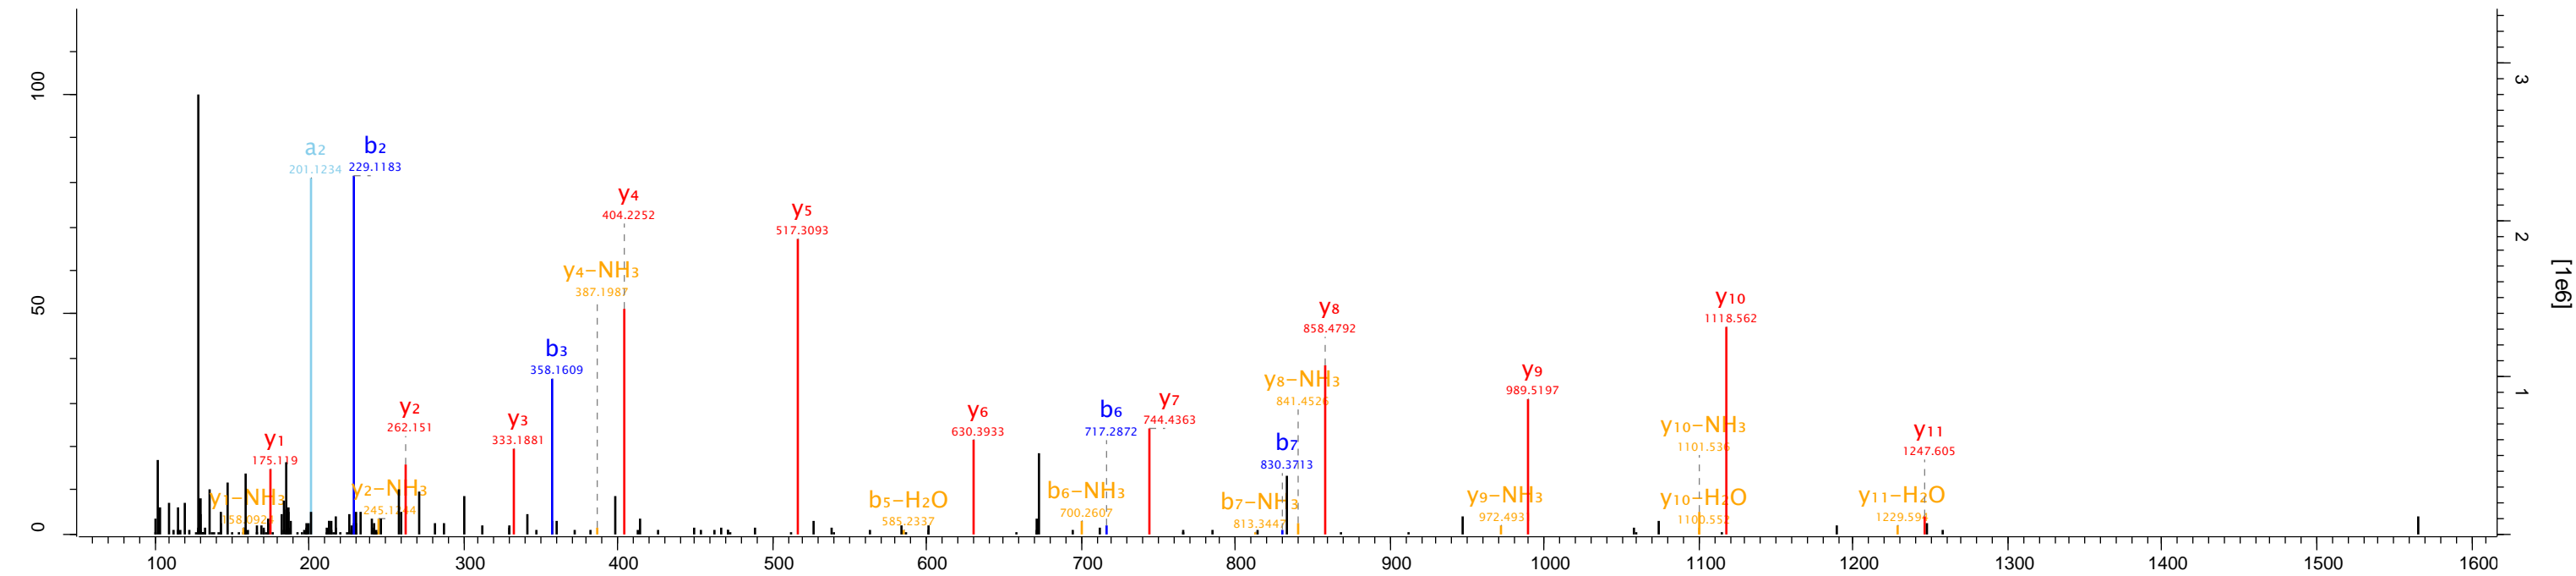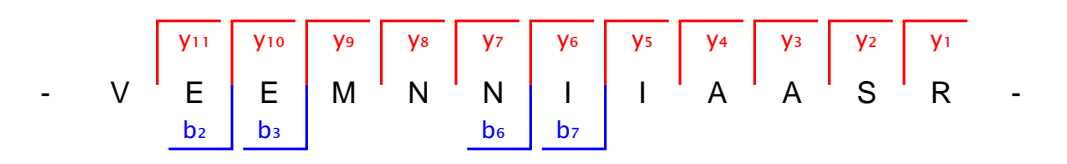



Raw file: 20140827\_EXQ00\_FaHo\_SA\_BDF1\_03  
 Scan: 6058 Method: FTMS; HCD Score: 110.08 m/z: 661.35 Gene names: ERV29

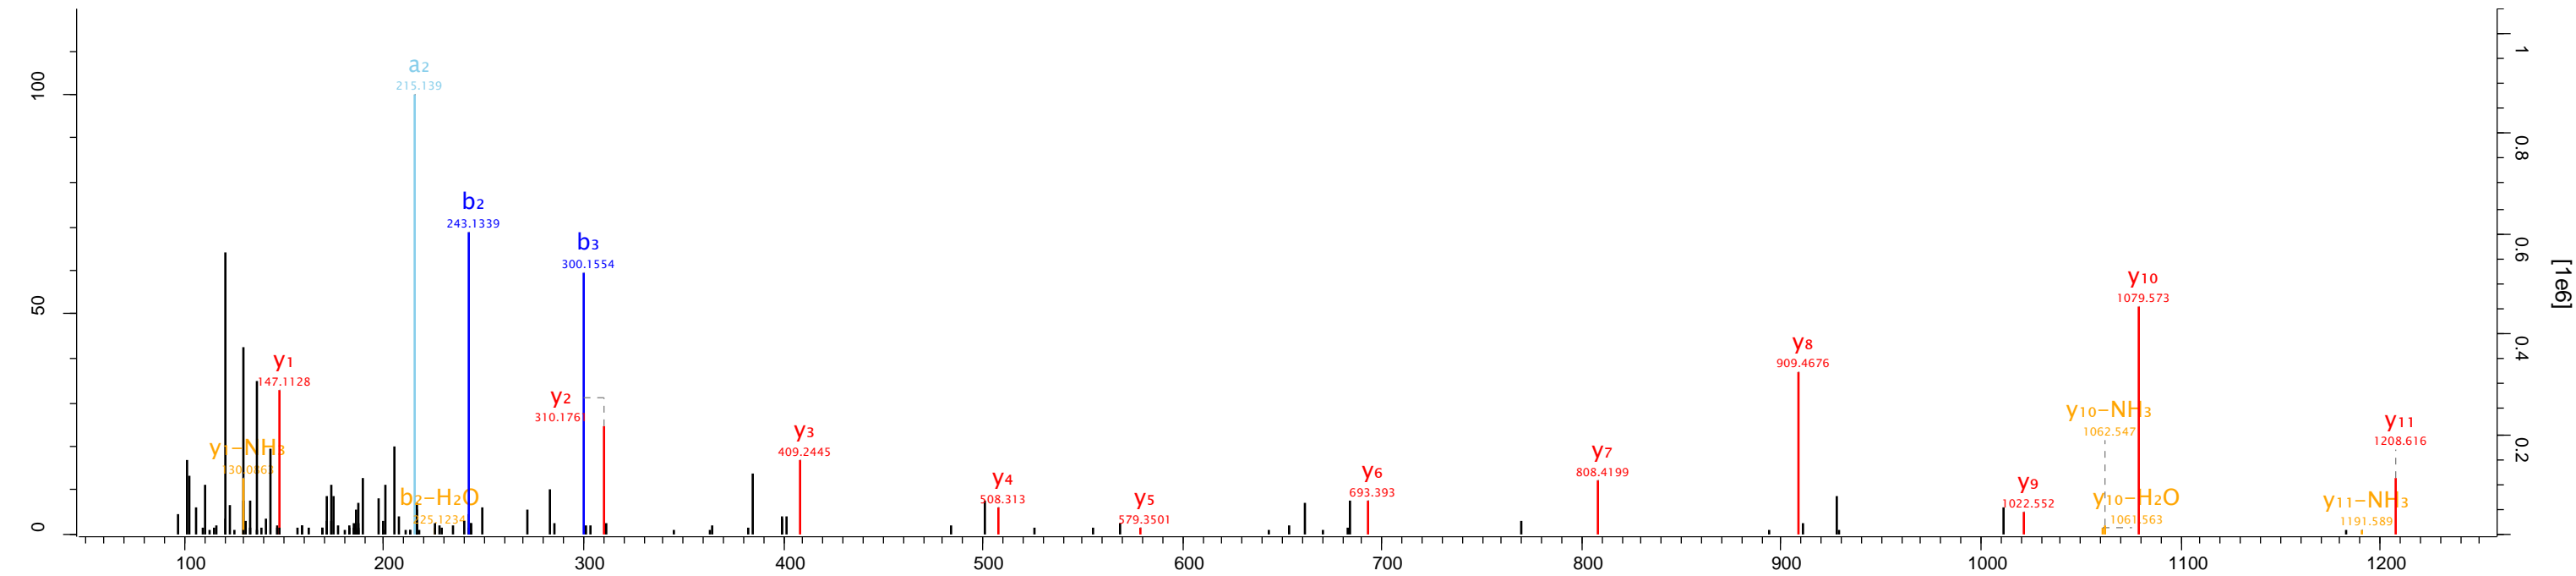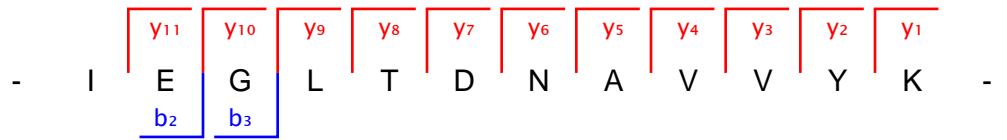

Raw file 20140827\_EXQ00\_FaHo\_SA\_BDF1\_03 Scan 7585 Method FTMS; HCD Score 84.75 m/z 766.42 Gene names RPT6

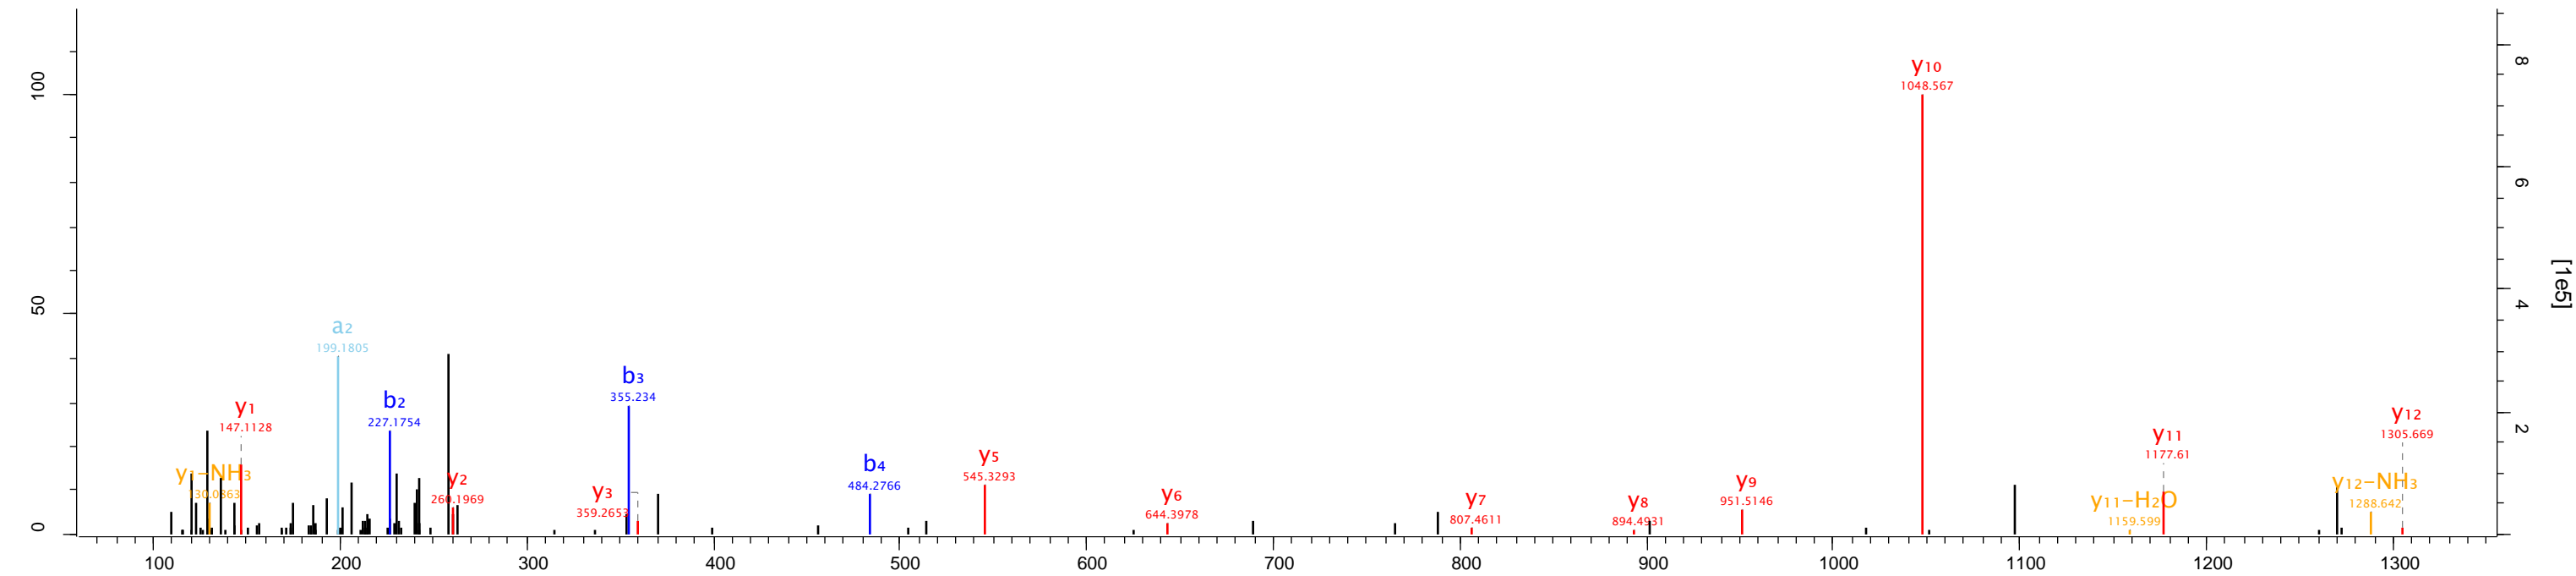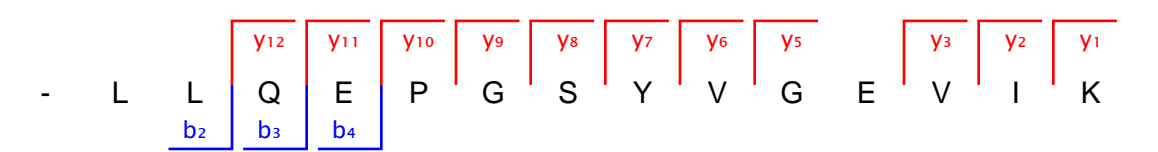

Raw file: 20140827\_EXQ00\_FaHo\_SA\_BDF1\_03  
 Scan: 8286 Method: FTMS; HCD Score: 100.11 m/z: 602.99 Gene names: RPL9A;RPL9B

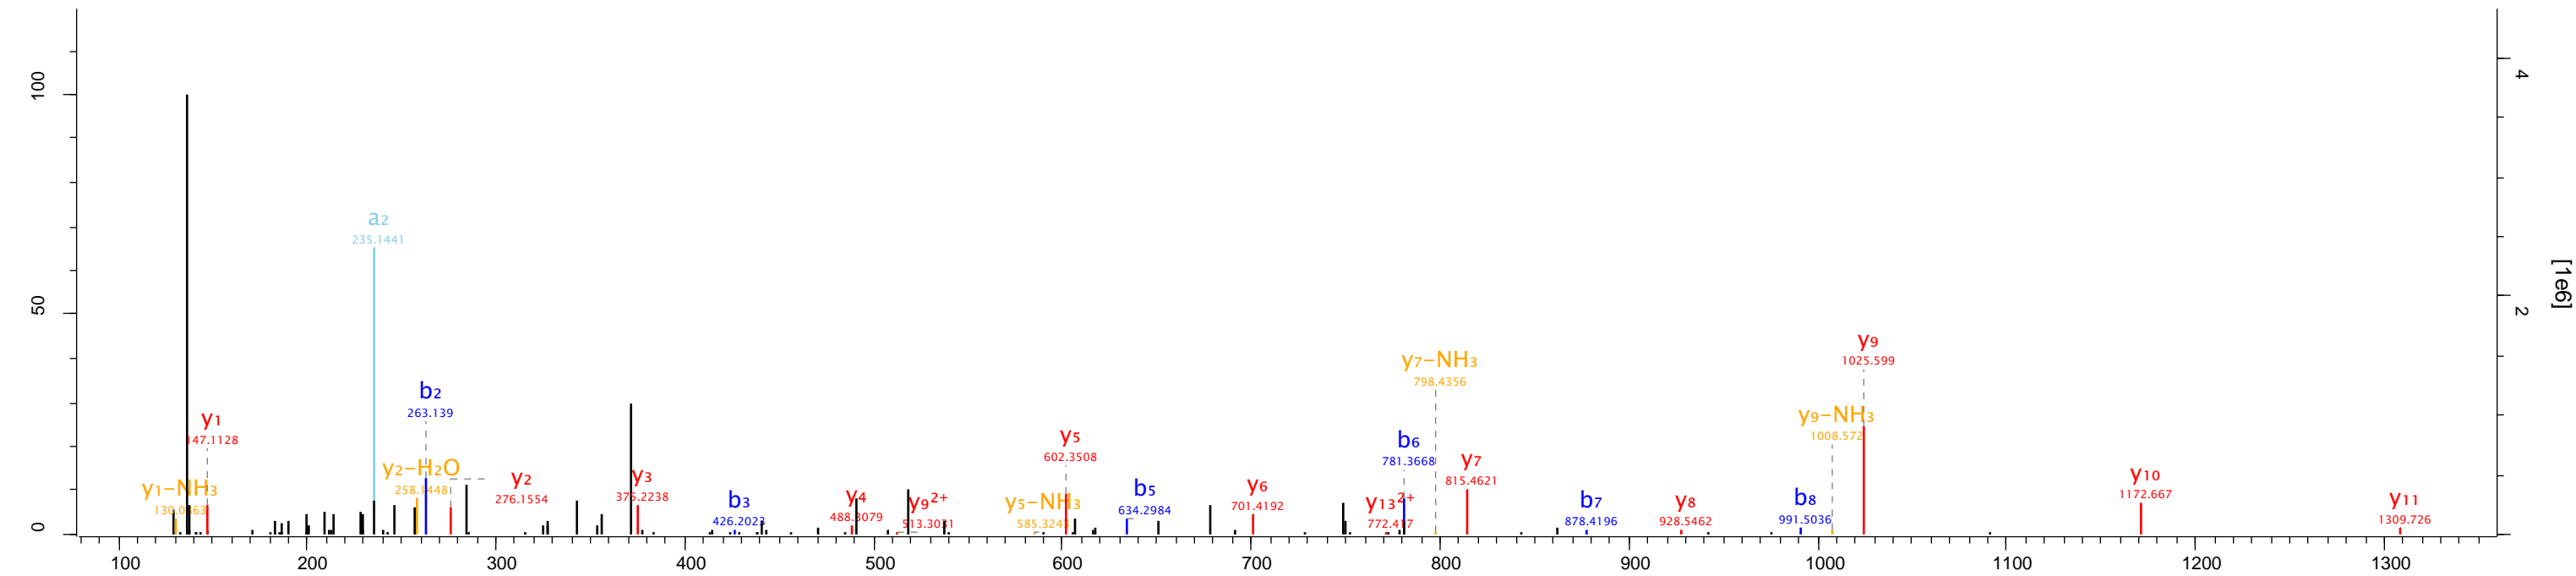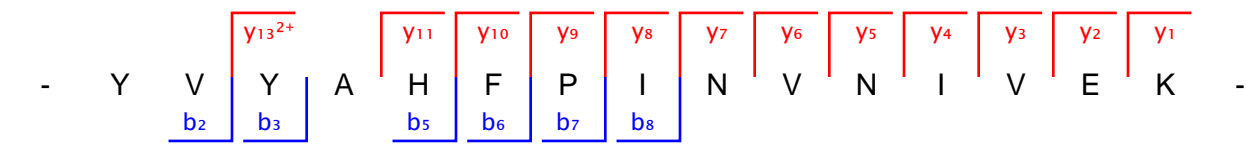

Raw file 20140827\_EXQ00\_FaHo\_SA\_BDF1\_03 Scan 8802 Method FTMS; HCD Score 64.59 m/z 871.48 Gene names RPL4B;RPL4A

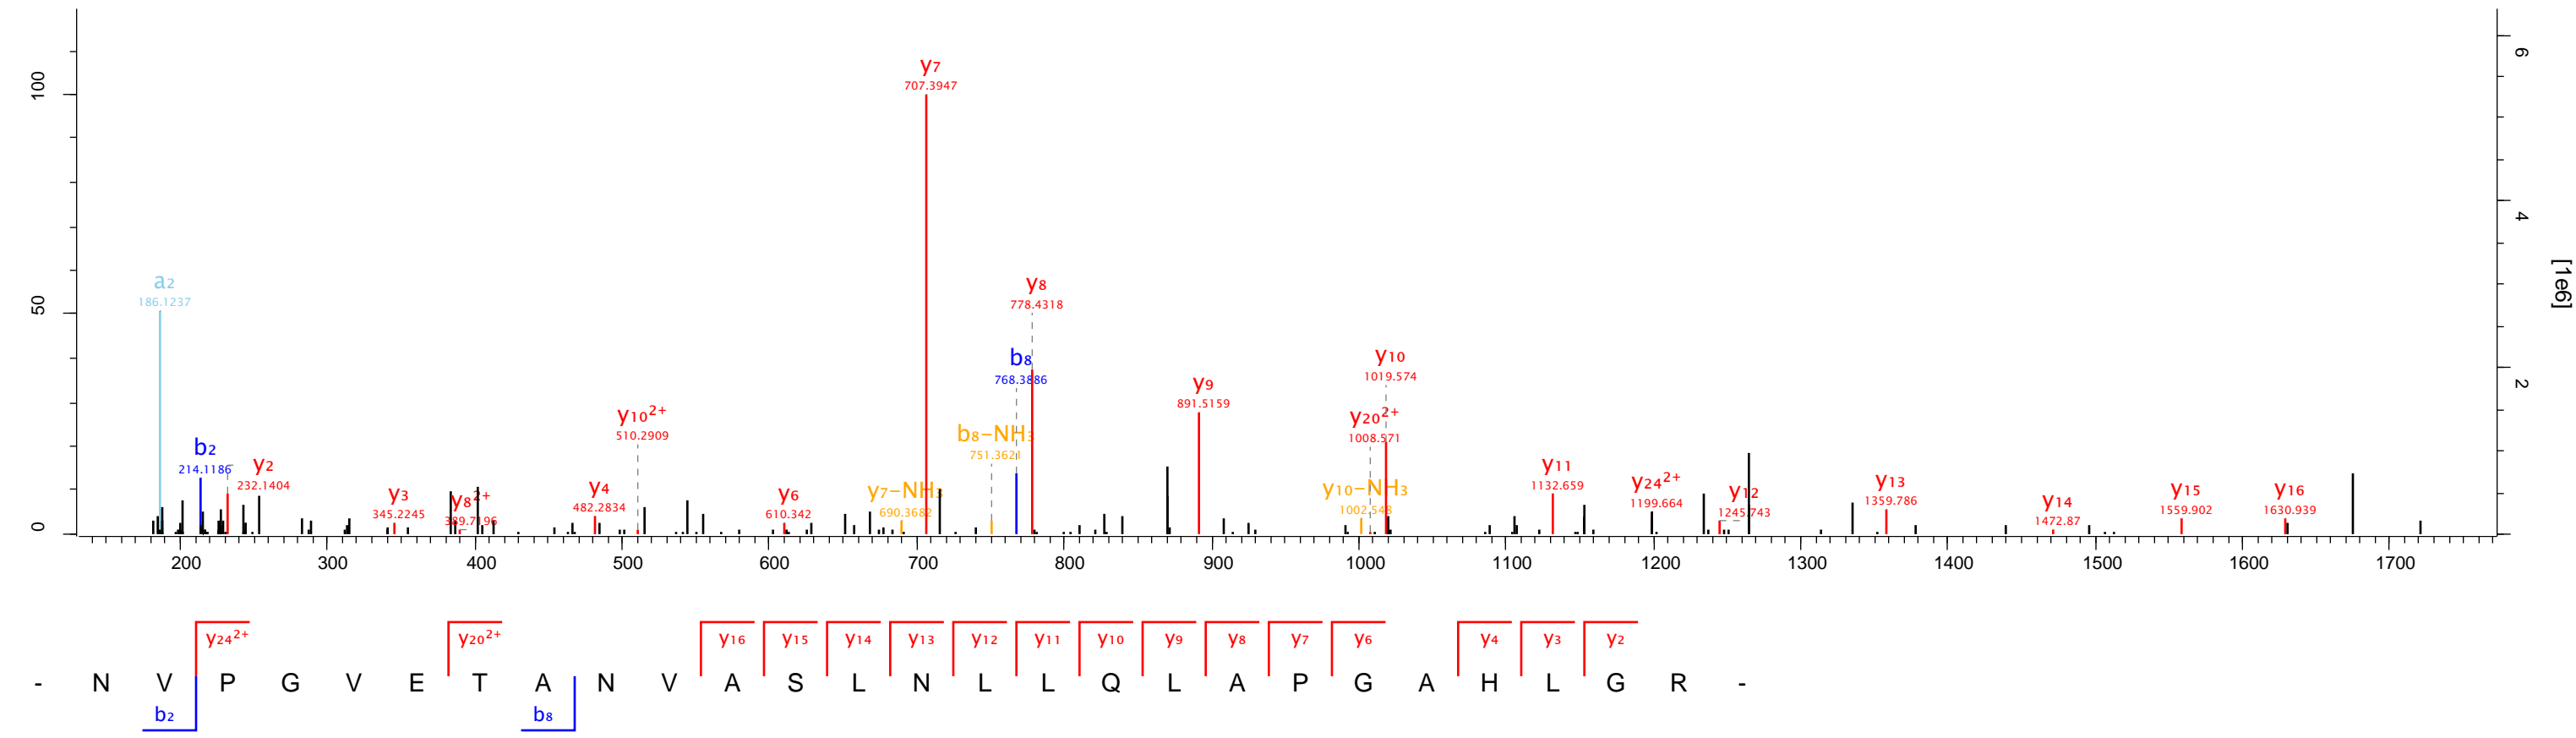

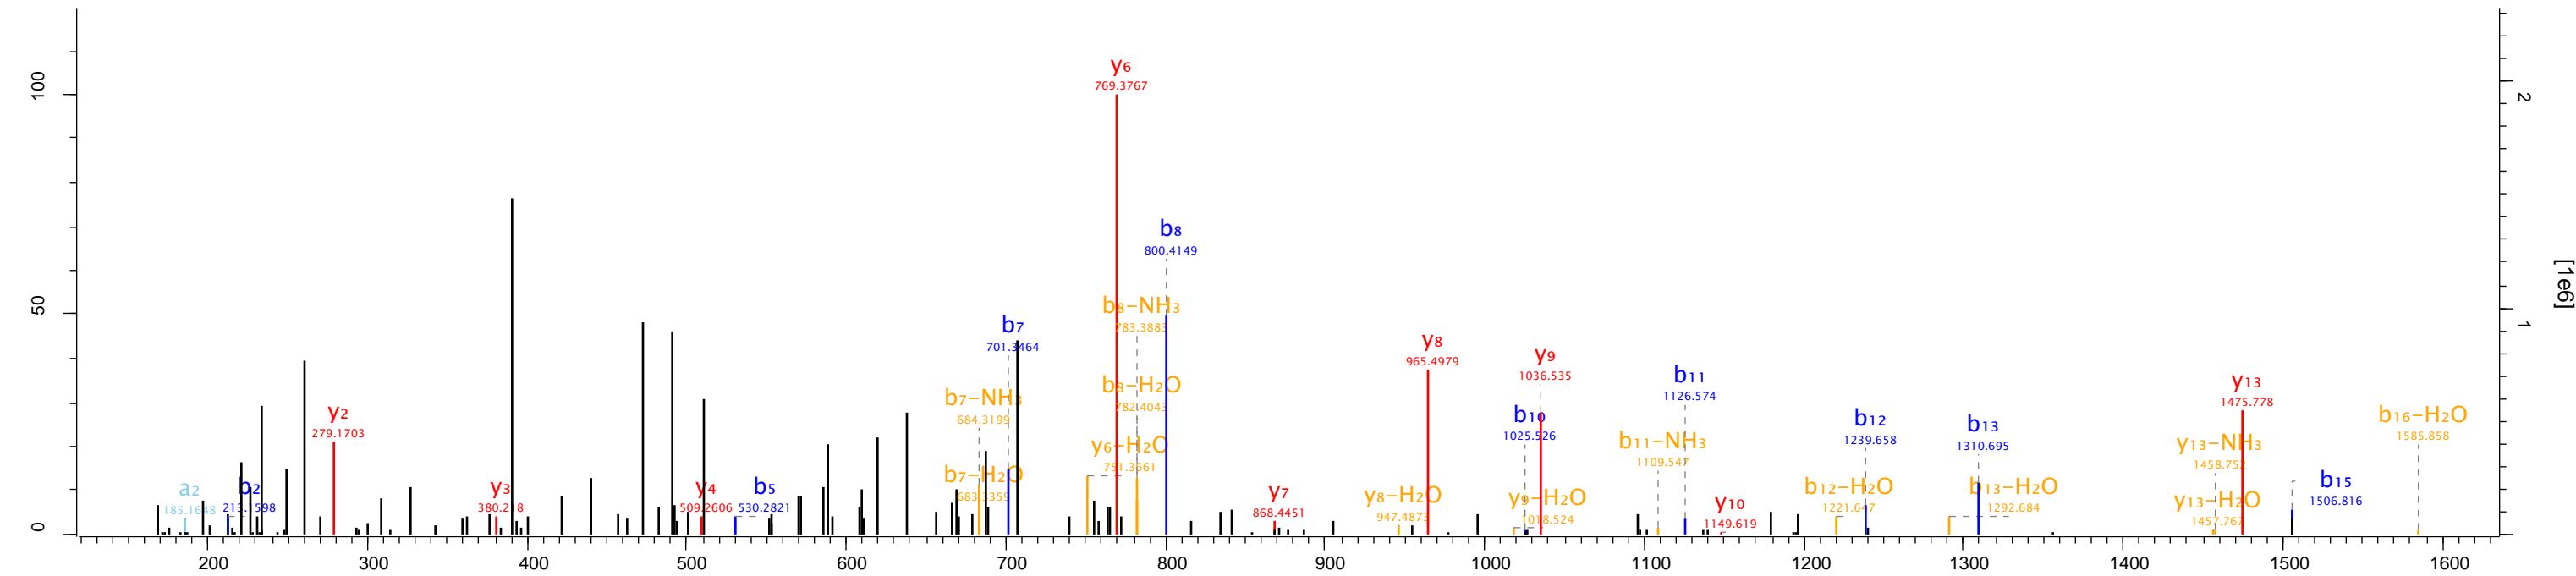

- I V S T E G N V P Q T L A P V P Y E T F I -

Fragmentation sites are indicated by brackets below the sequence:

- b2: V
- b5: E
- b7: N
- b8: V
- b10: Q
- b11: T
- b12: L
- b13: A
- b15: V
- y2: F
- y3: T
- y4: E
- y6: P
- y7: V
- y8: P
- y9: A
- y10: L
- y13: P

Raw file 20140827\_EXQ00\_FaHo\_SA\_BDF2\_01 Scan 3821 Method FTMS; HCD Score 94.26 m/z 408.22 Gene names RPS14A

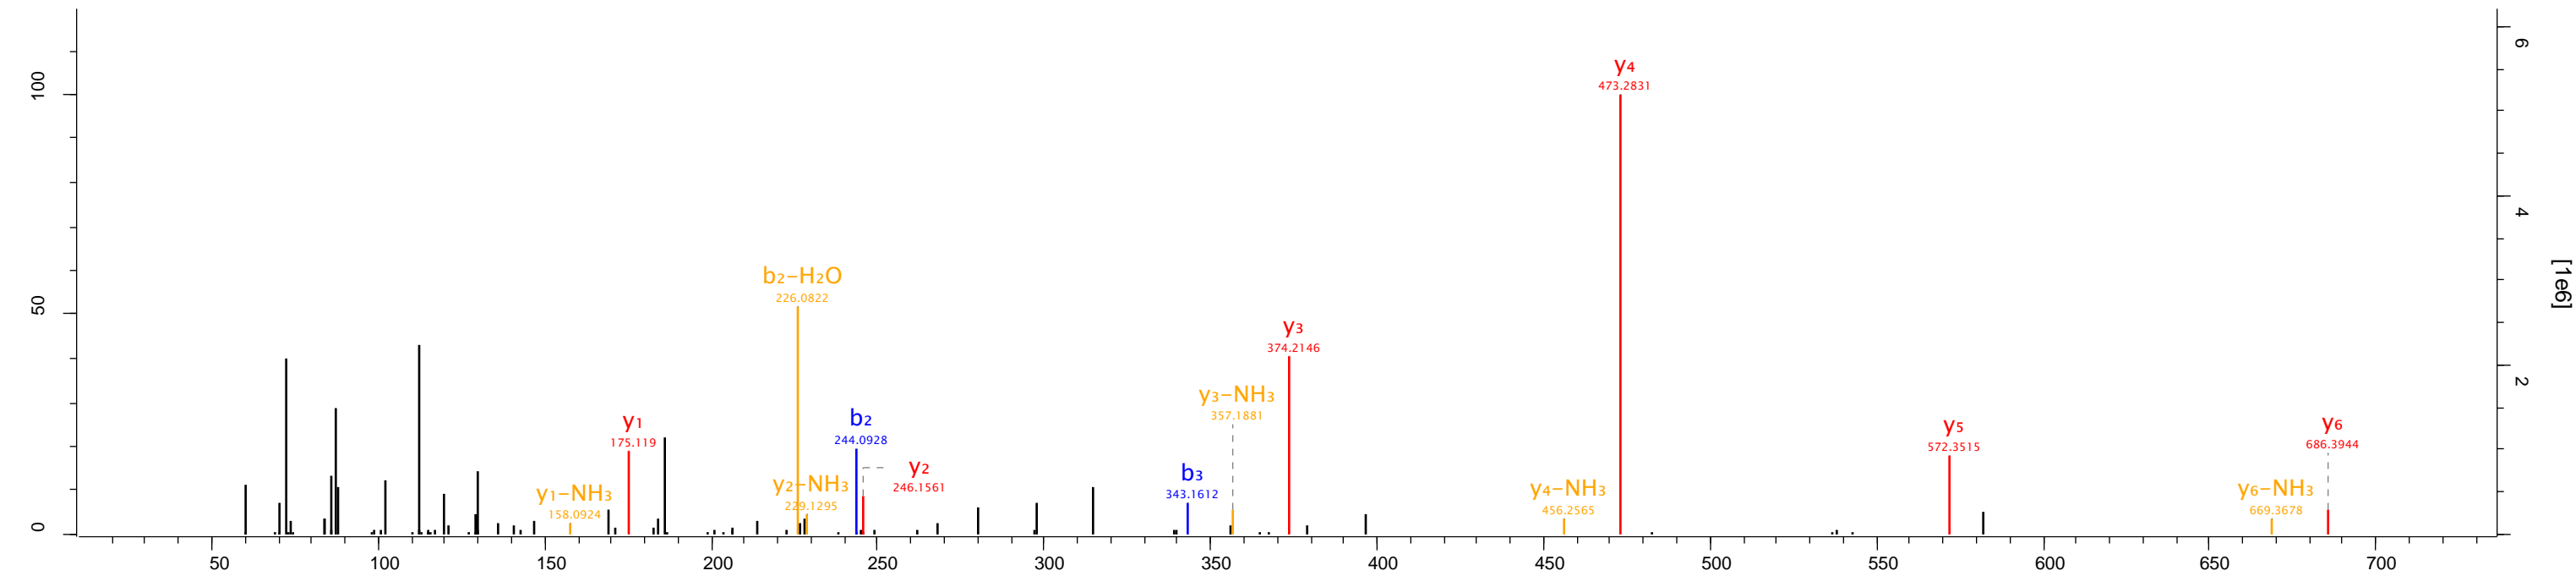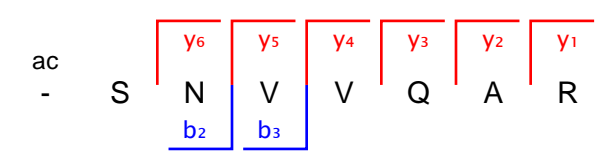

Raw file 20140827\_EXQ00\_FaHo\_SA\_BDF2\_01 Scan 4932 Method FTMS; HCD Score 80.74 m/z 572.97 Gene names RPL4A

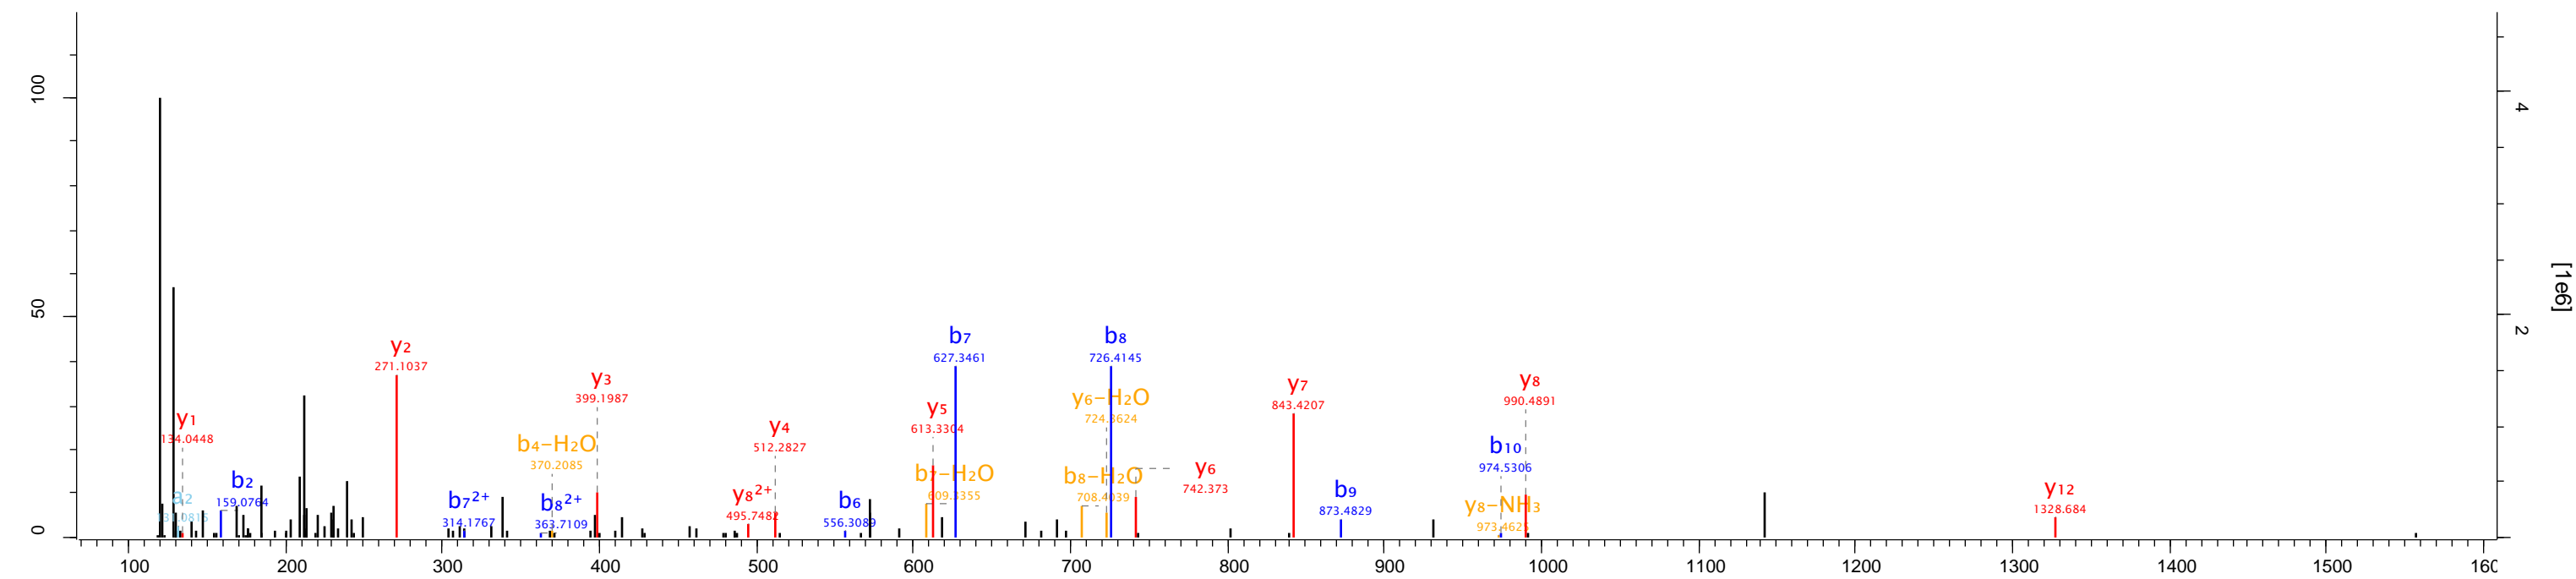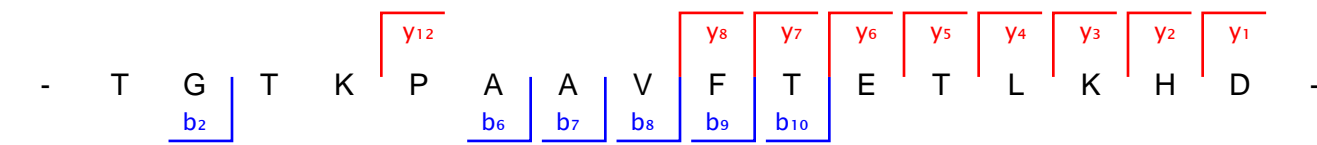

Raw file 20140827\_EXQ00\_FaHo\_SA\_BDF2\_01 Scan 5716 Method FTMS; HCD Score 80.74 m/z 867.43 Gene names UBP3

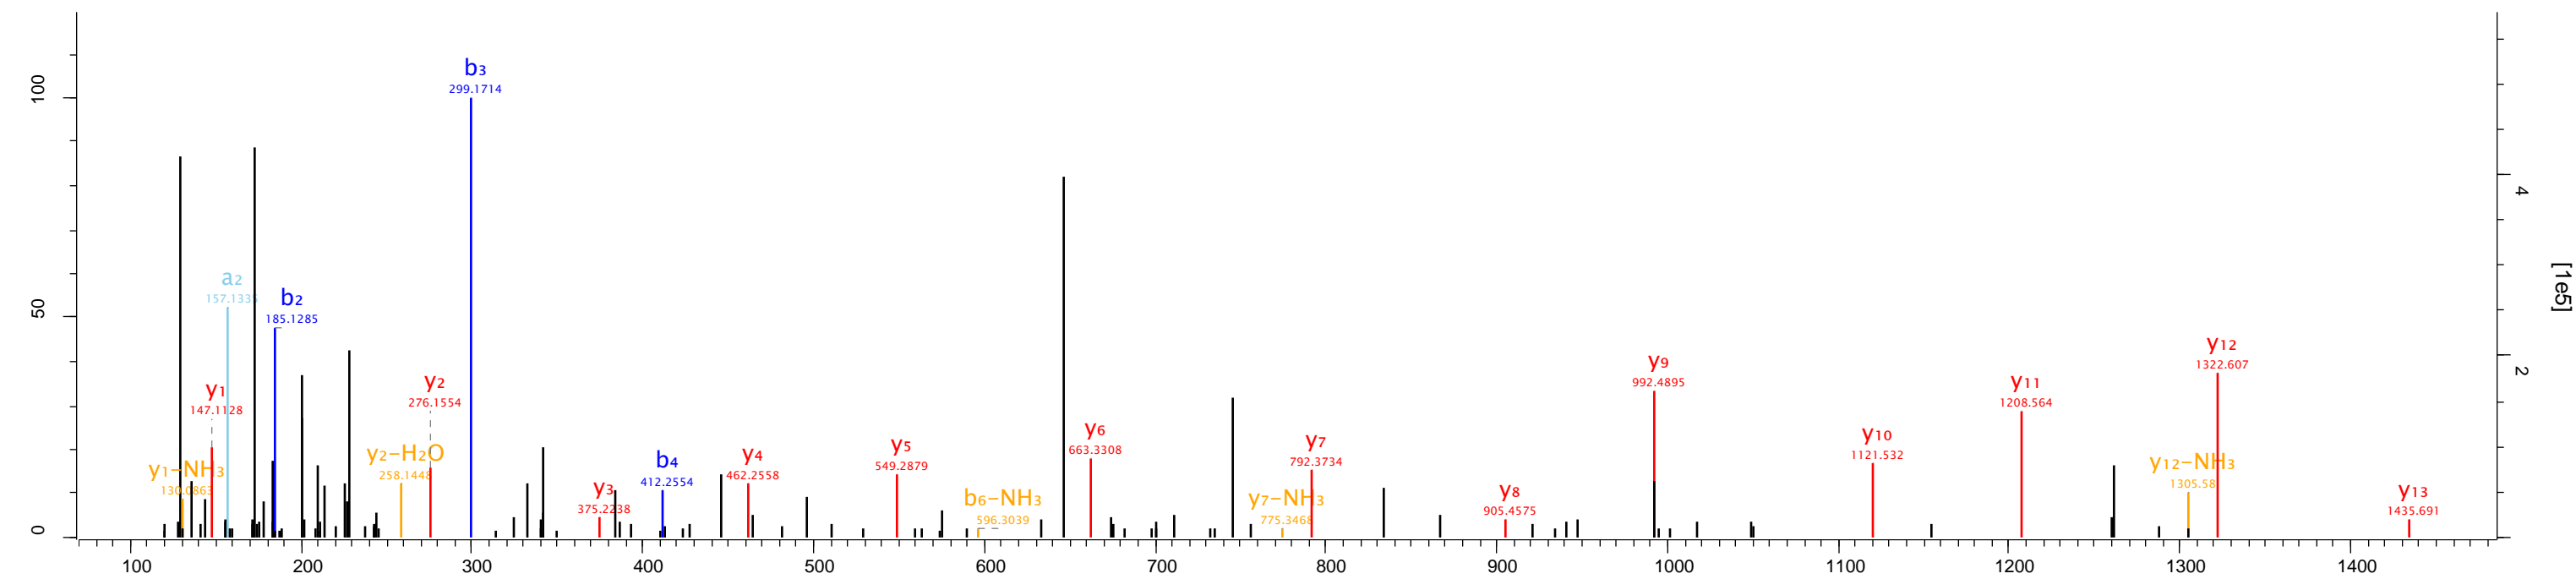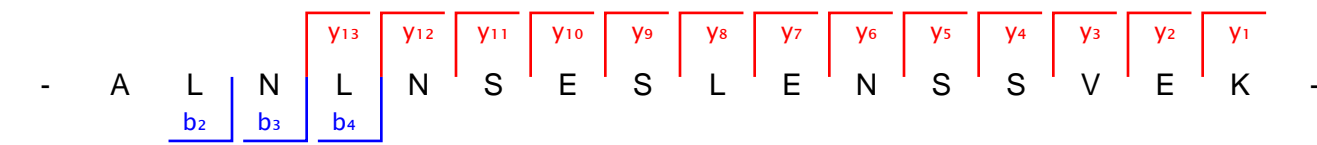



Raw file 20140827\_EXQ00\_FaHo\_SA\_BDF2\_01 Scan 7228 Method FTMS; HCD Score 64.1 m/z 726.39 Gene names RLP24

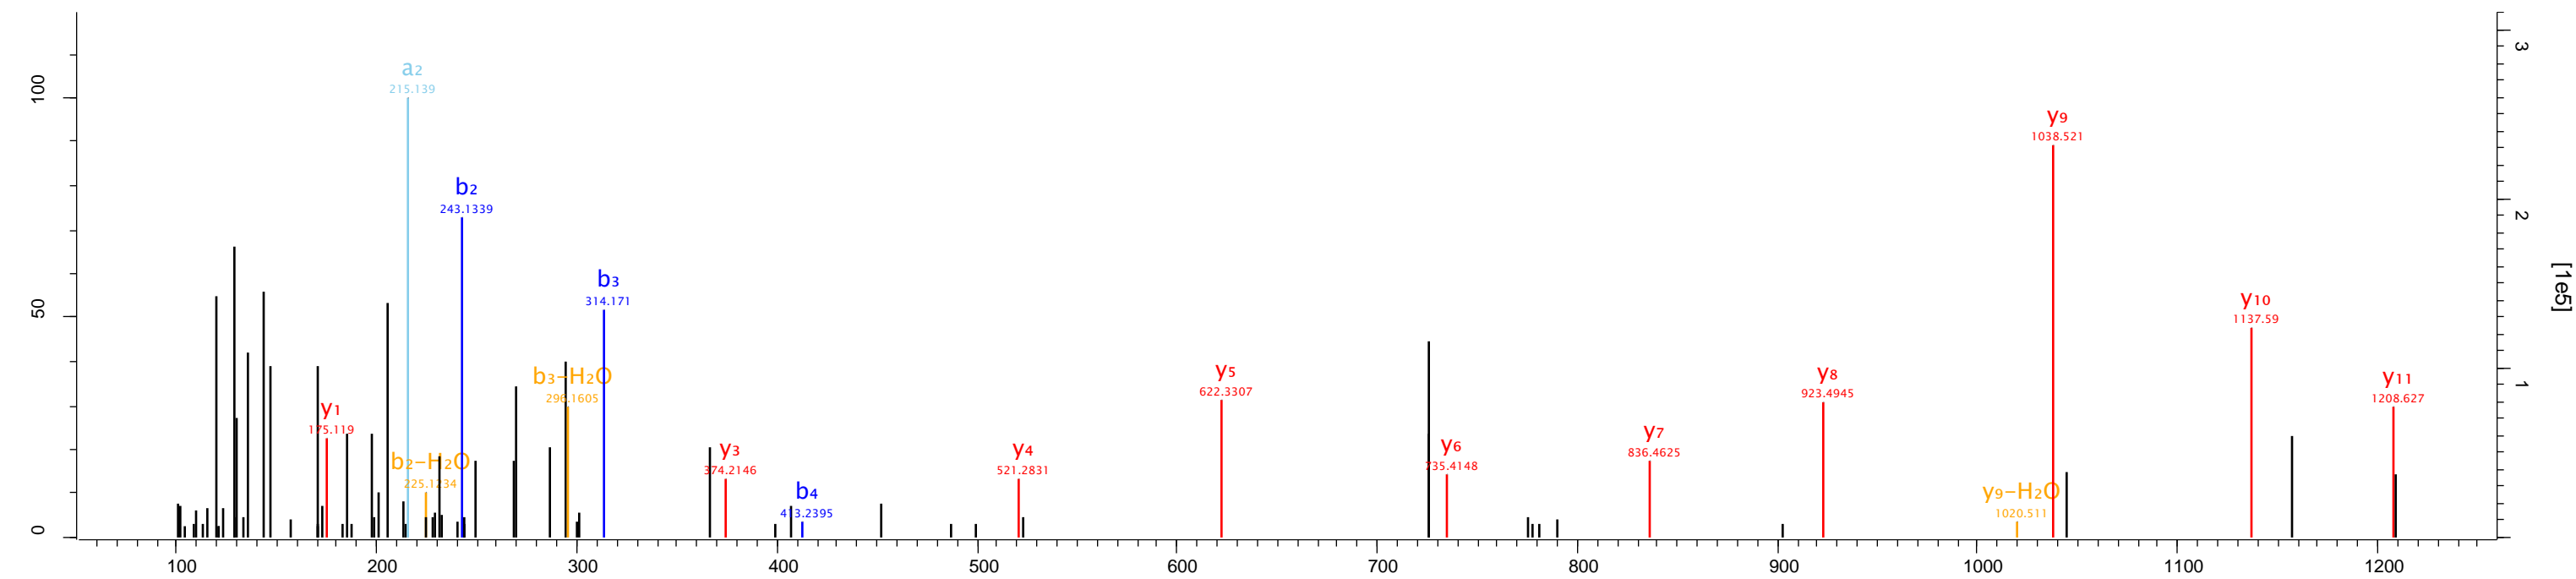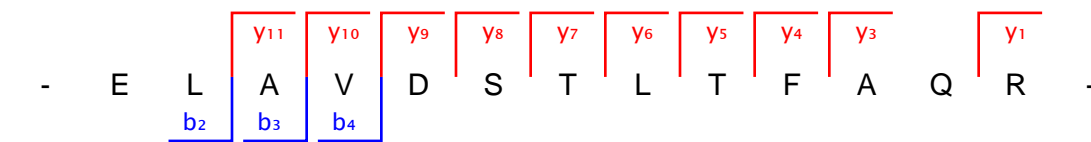

Raw file  
20140827\_EXQ00\_FaHo\_SA\_BDF2\_02

Scan 3425 Method FTMS; HCD Score 113.7 m/z 386.72 Gene names PDR15

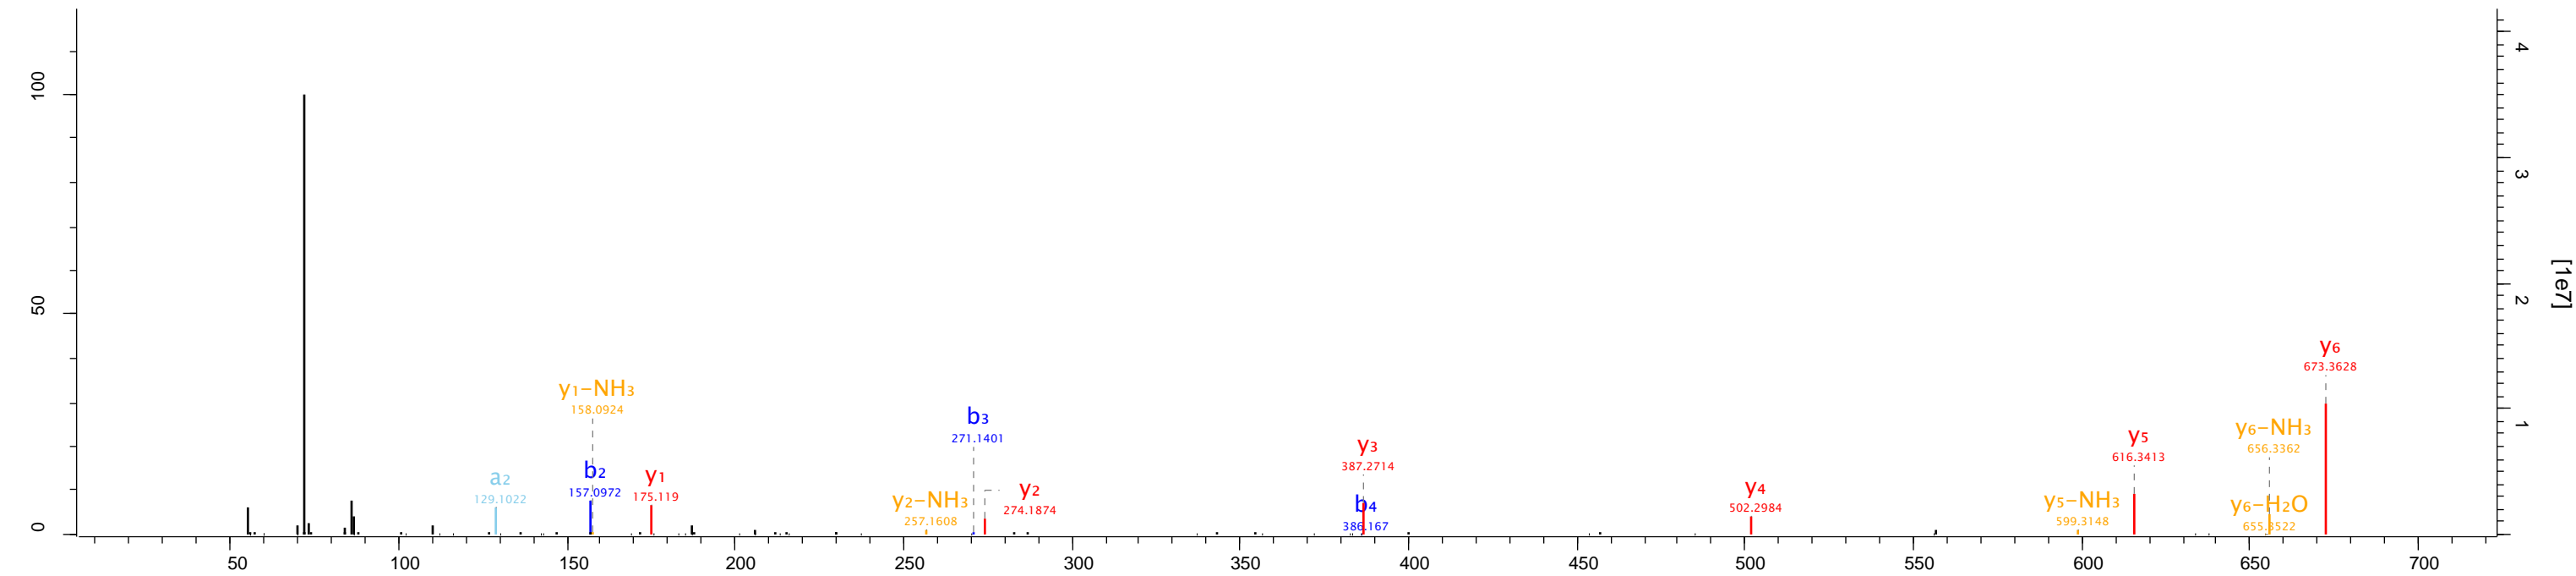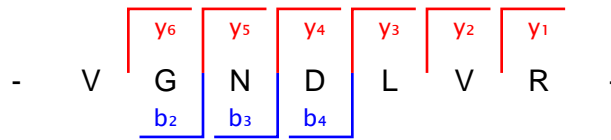

Raw file 20140827\_EXQ00\_FaHo\_SA\_BDF2\_02 Scan 4951 Method FTMS; HCD Score 143.96 m/z 650.83 Gene names RPL17A

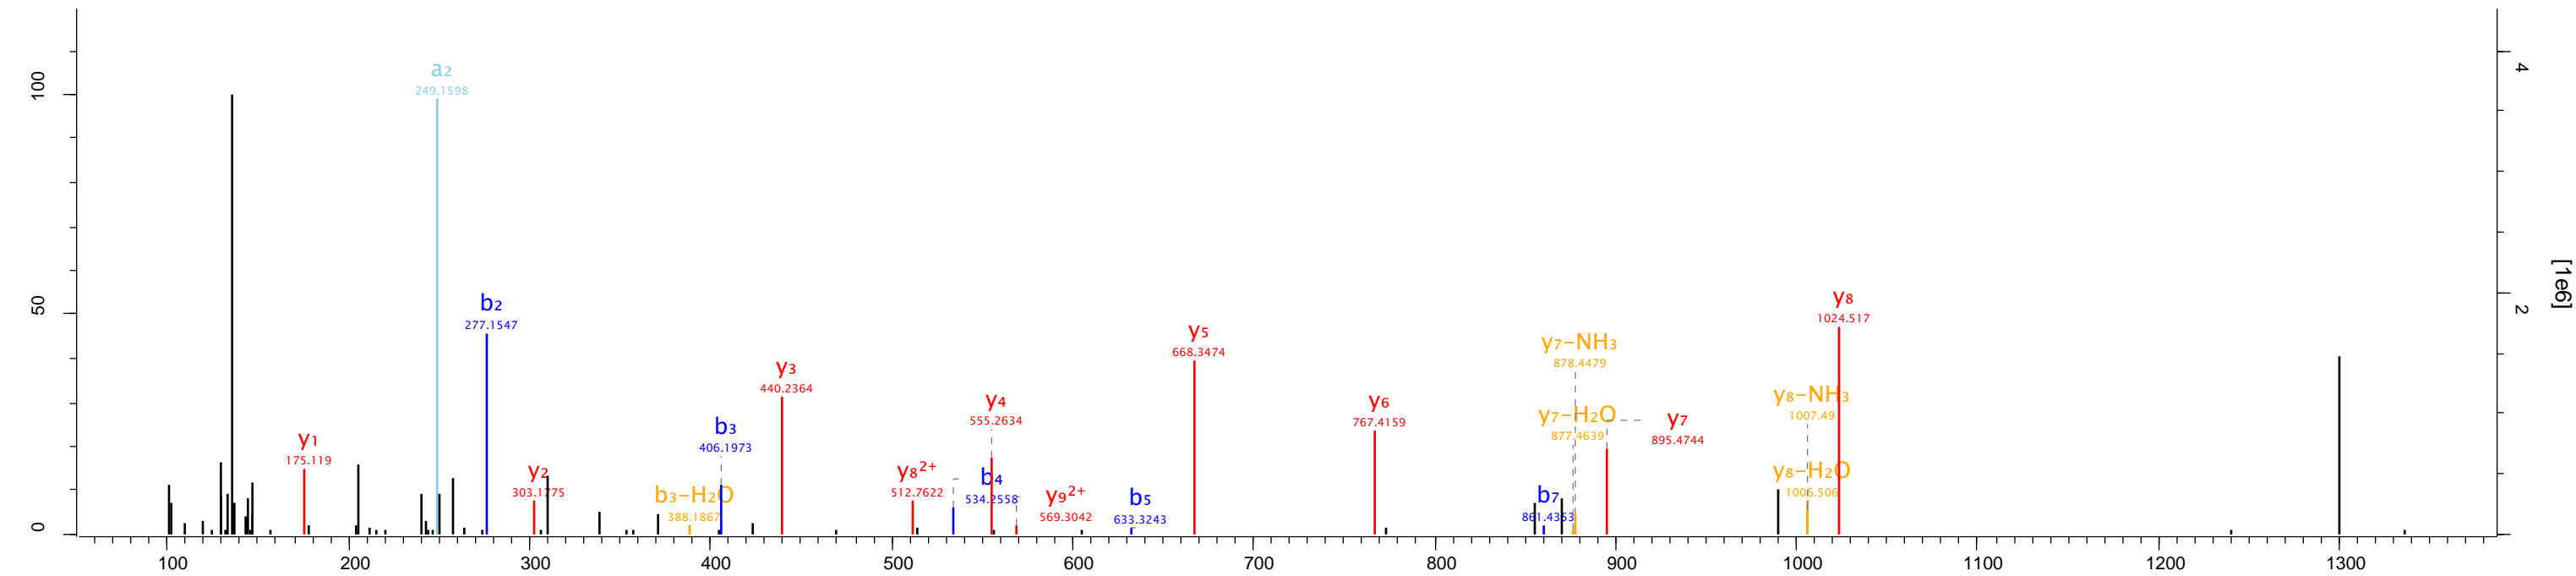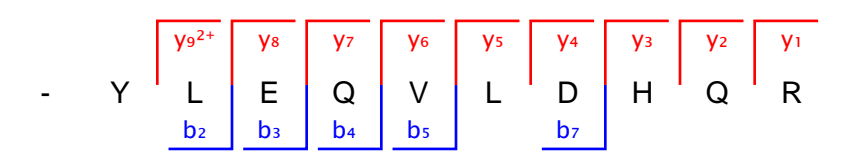

Raw file 20140827\_EXQ00\_FaHo\_SA\_BDF2\_02 Scan 5445 Method FTMS; HCD Score 67.1 m/z 538.61 Gene names MDS3

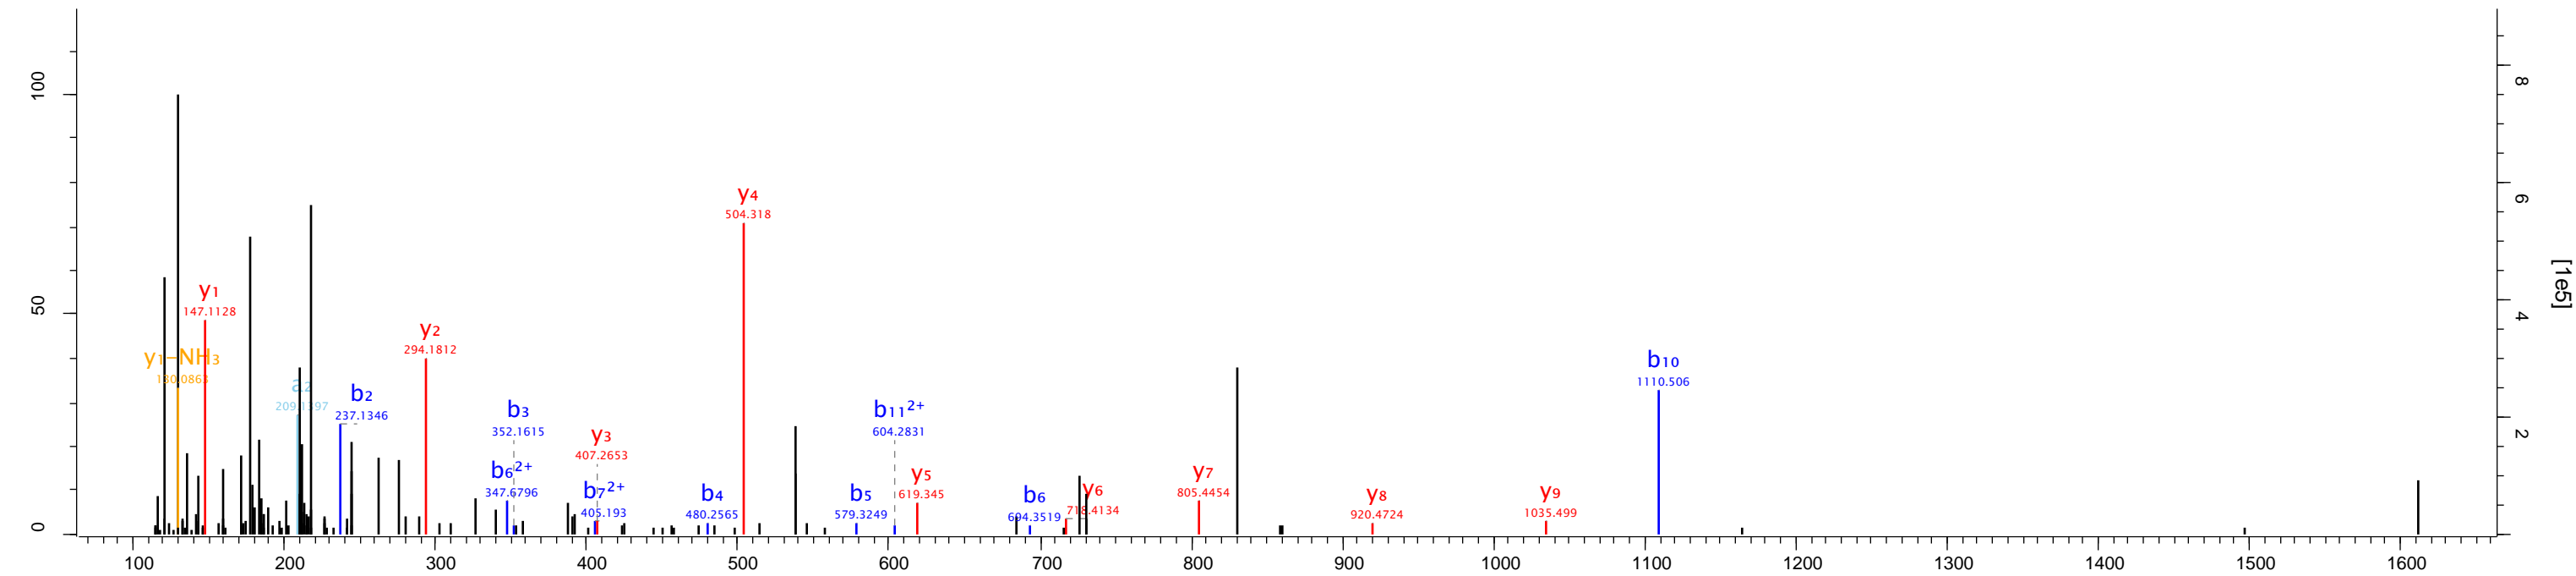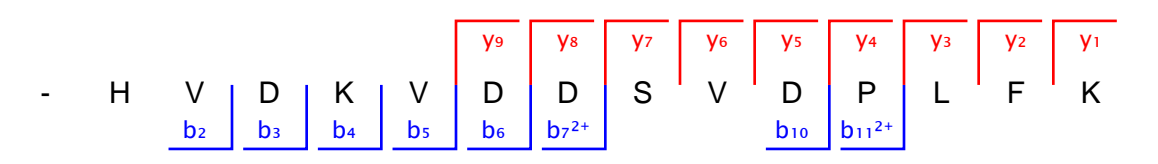

Raw file 20140827\_EXQ00\_FaHo\_SA\_BDF2\_02 Scan 7184 Method FTMS; HCD Score 82.42 m/z 624.35 Gene names ATP5

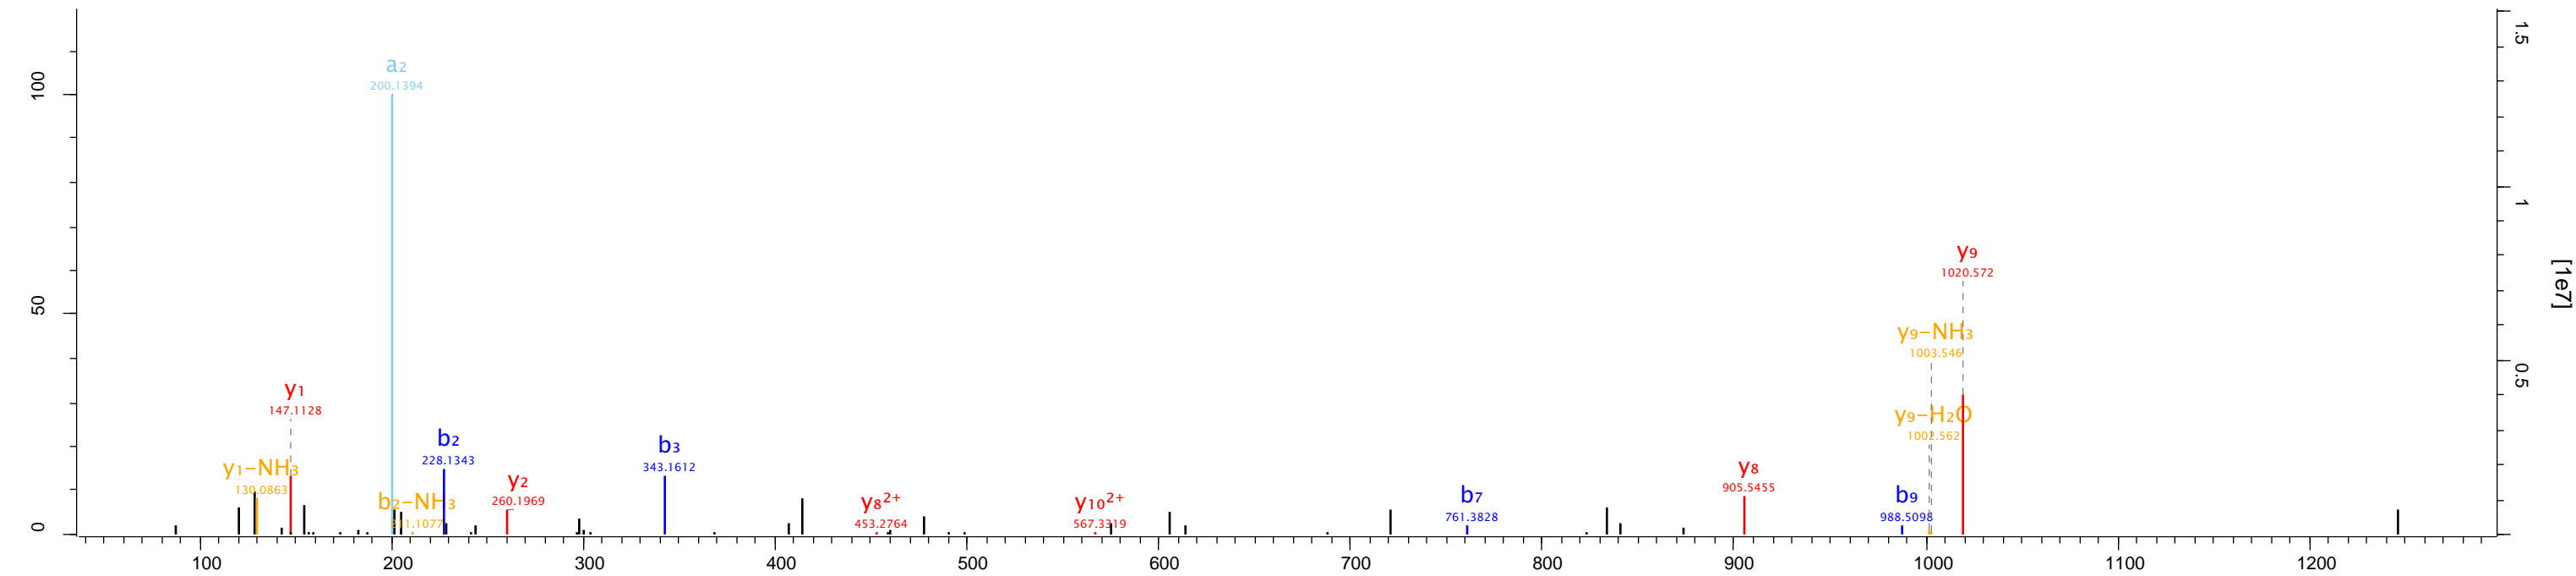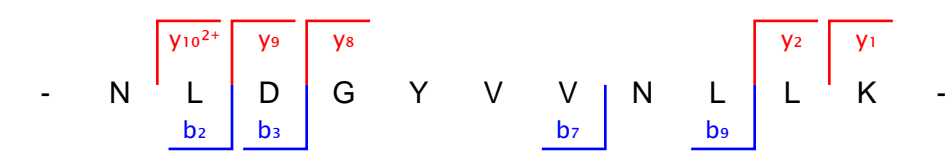

Raw file  
20140827\_EXQ00\_FaHo\_SA\_BDF2\_02

Scan Method Score m/z Gene names  
7374 FTMS; HCD 42.63 731.04 ATP7

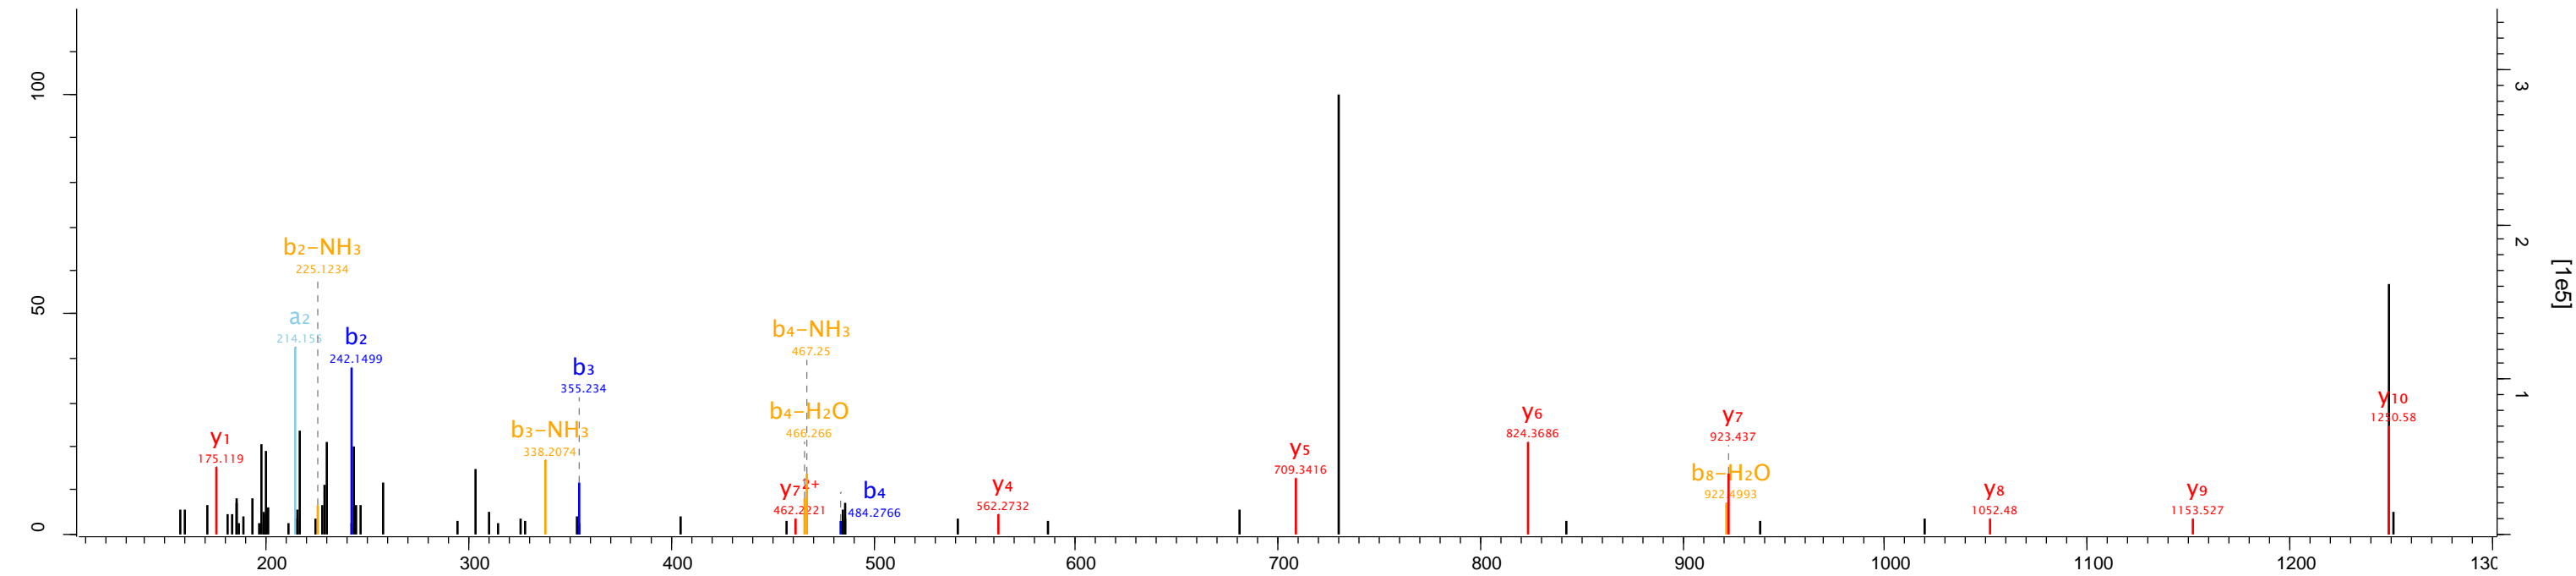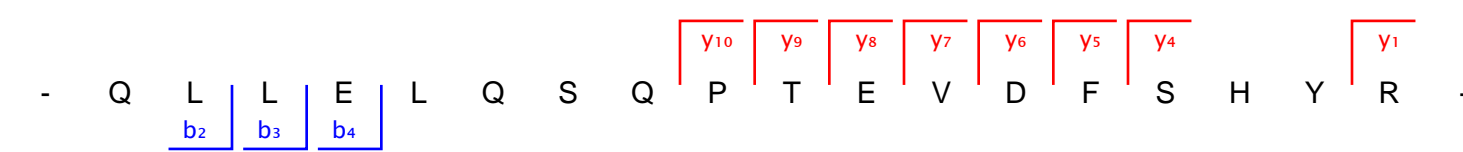

Raw file  
20140827\_EXQ00\_FaHo\_SA\_BDF2\_03

Scan Method Score m/z Gene names  
4159 FTMS; HCD 310.49 1209.06 TY1B-LR3;TY1A-PL;TY1A-LR2;TY1A-ER1;TY1A-DR6;TY1B-OL;TY1B-LR4;TY1B-LR2;TY1B-PL;TY1B-ER1;TY1B-PR3;TY1A-PR1;TY1A-A;TY1A-DR4

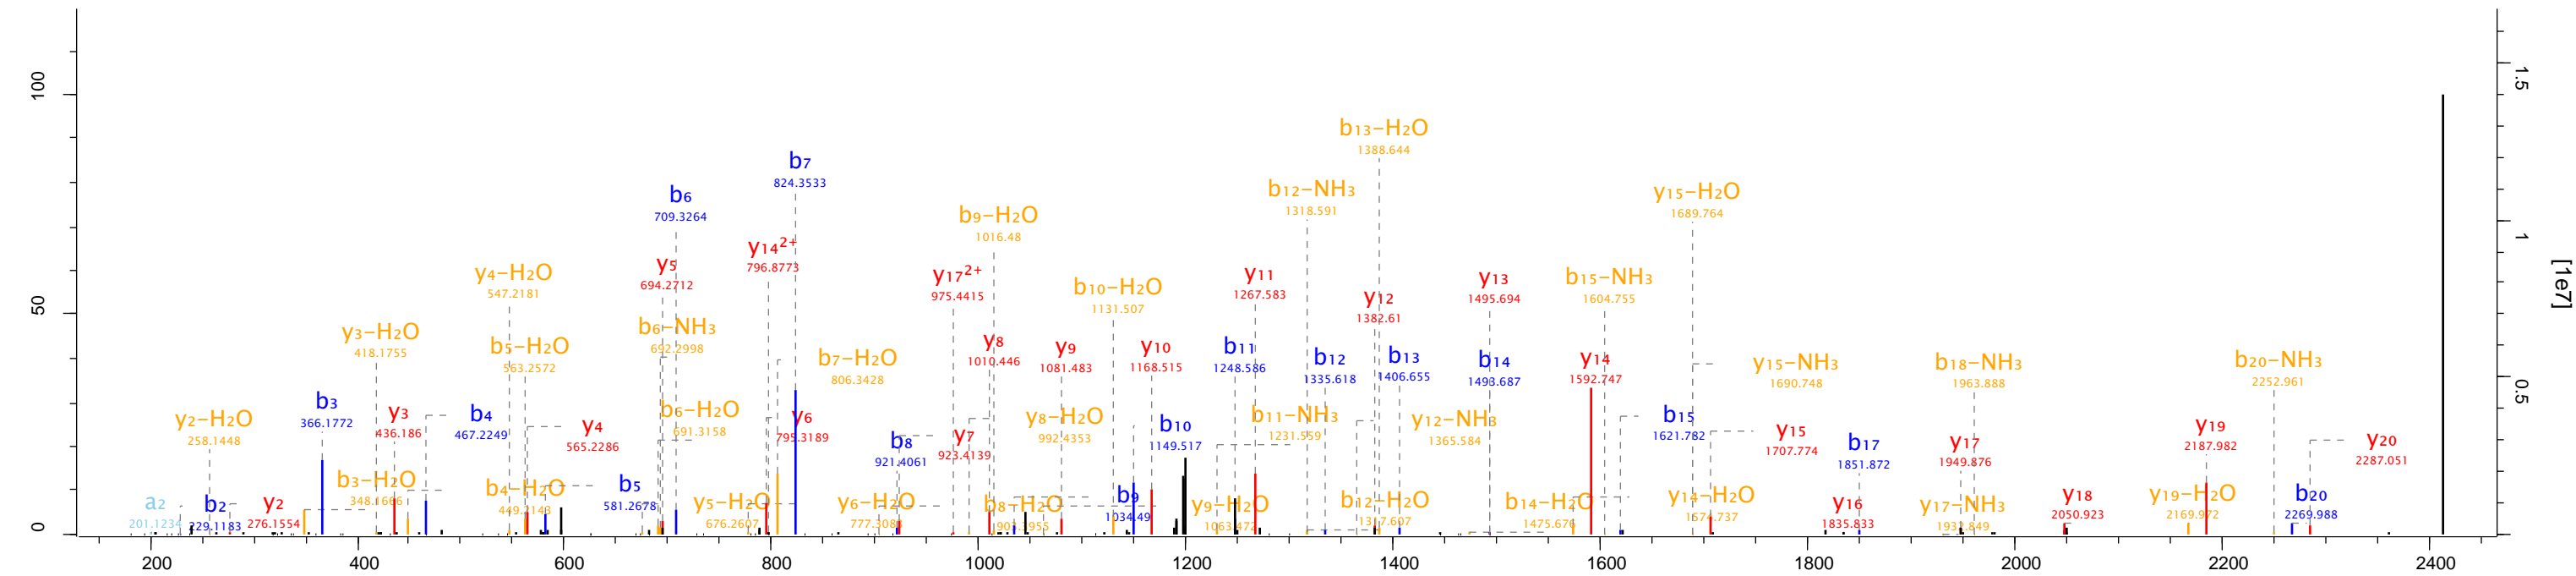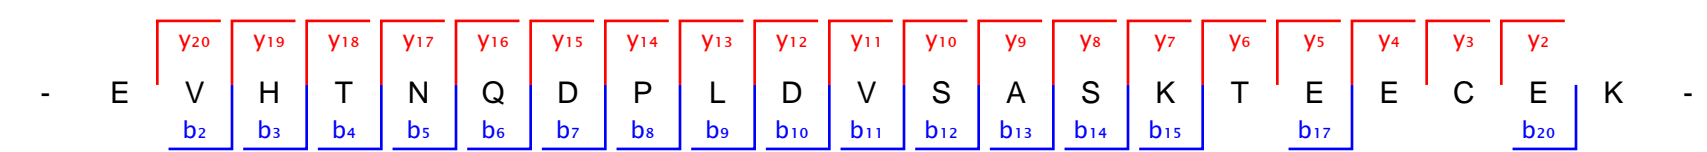

Raw file 20140827\_EXQ00\_FaHo\_SA\_BDF2\_03 Scan 5772 Method FTMS; HCD Score 99.14 m/z 429.75 Gene names RPL21A;RPL21B

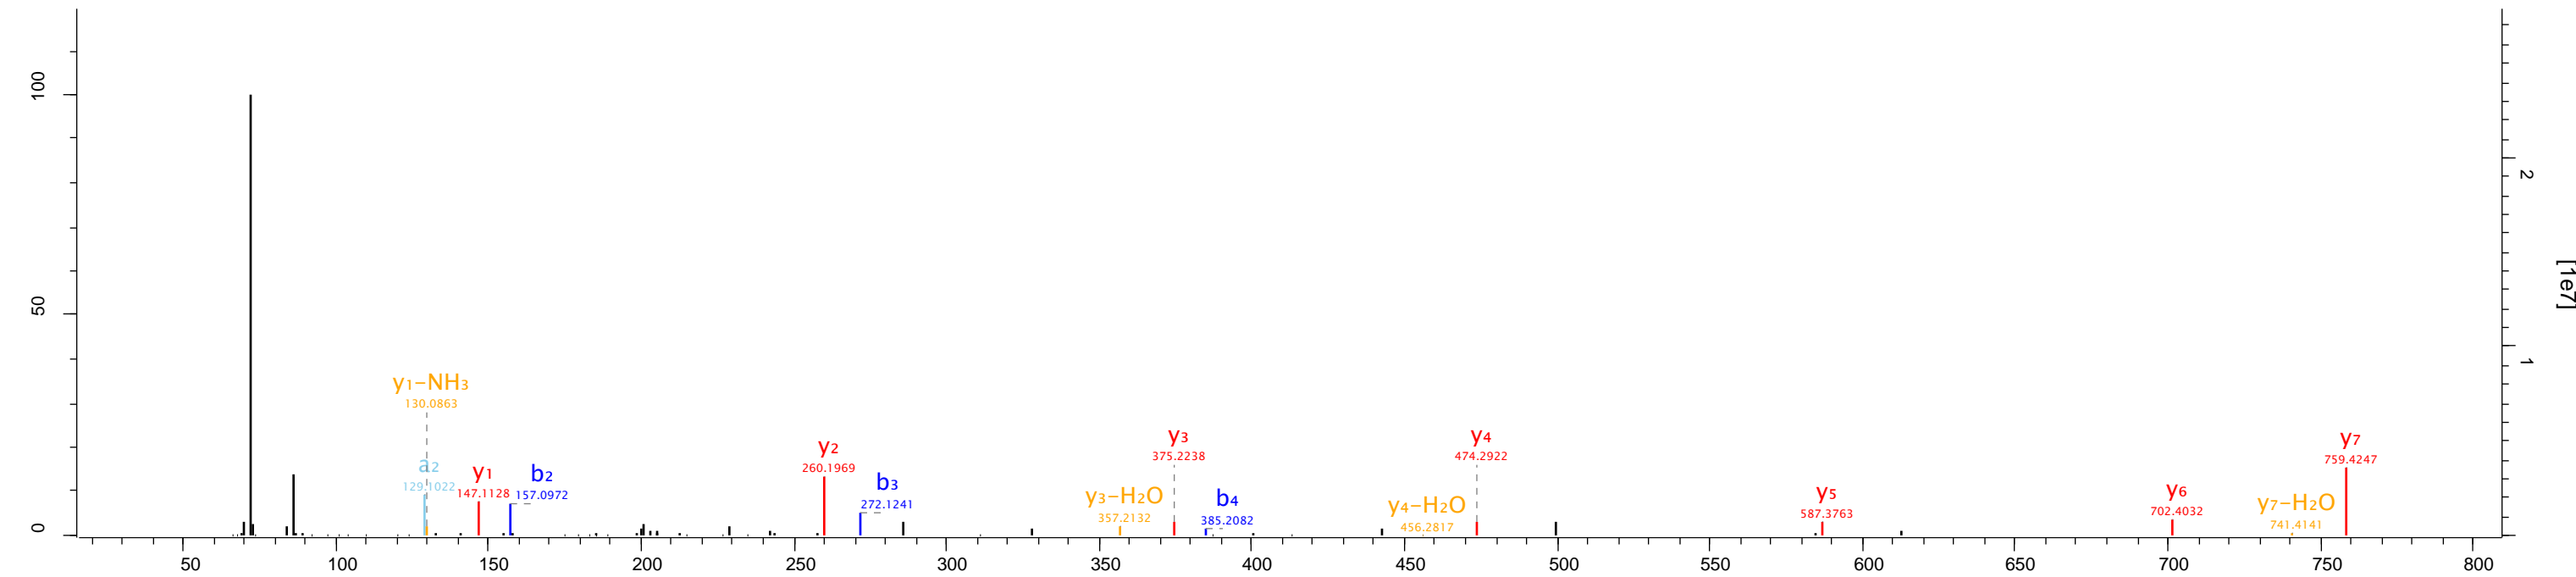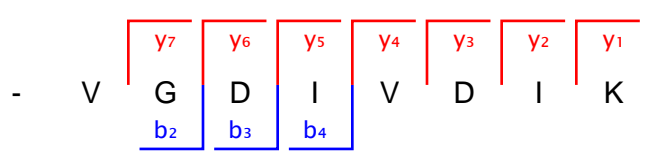



Raw file 20140827\_EXQ00\_FaHo\_SA\_BDF2\_03 Scan 8614 Method FTMS; HCD Score 166.6 m/z 1088.59 Gene names RPL9B

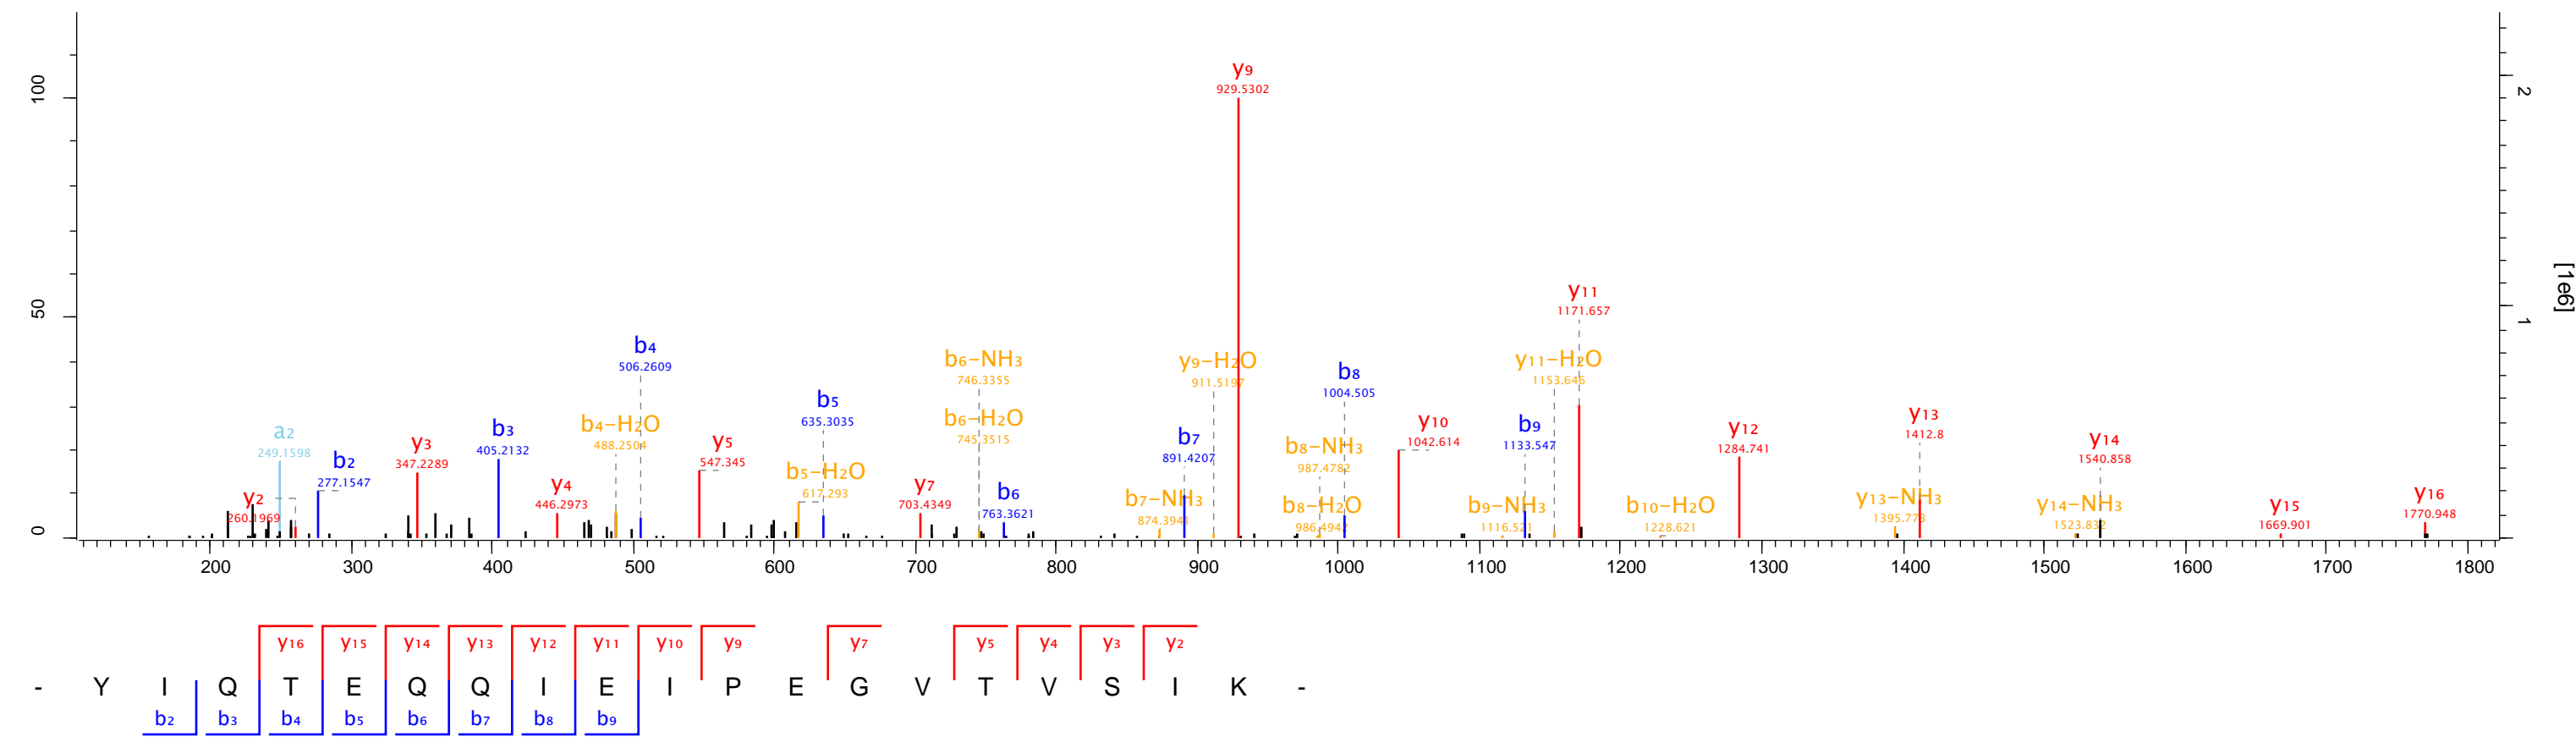

Raw file 20140827\_EXQ00\_FaHo\_SA\_BRE2\_01 Scan 4127 Method FTMS; HCD Score 7.94 m/z 413.2 Gene names ENO2

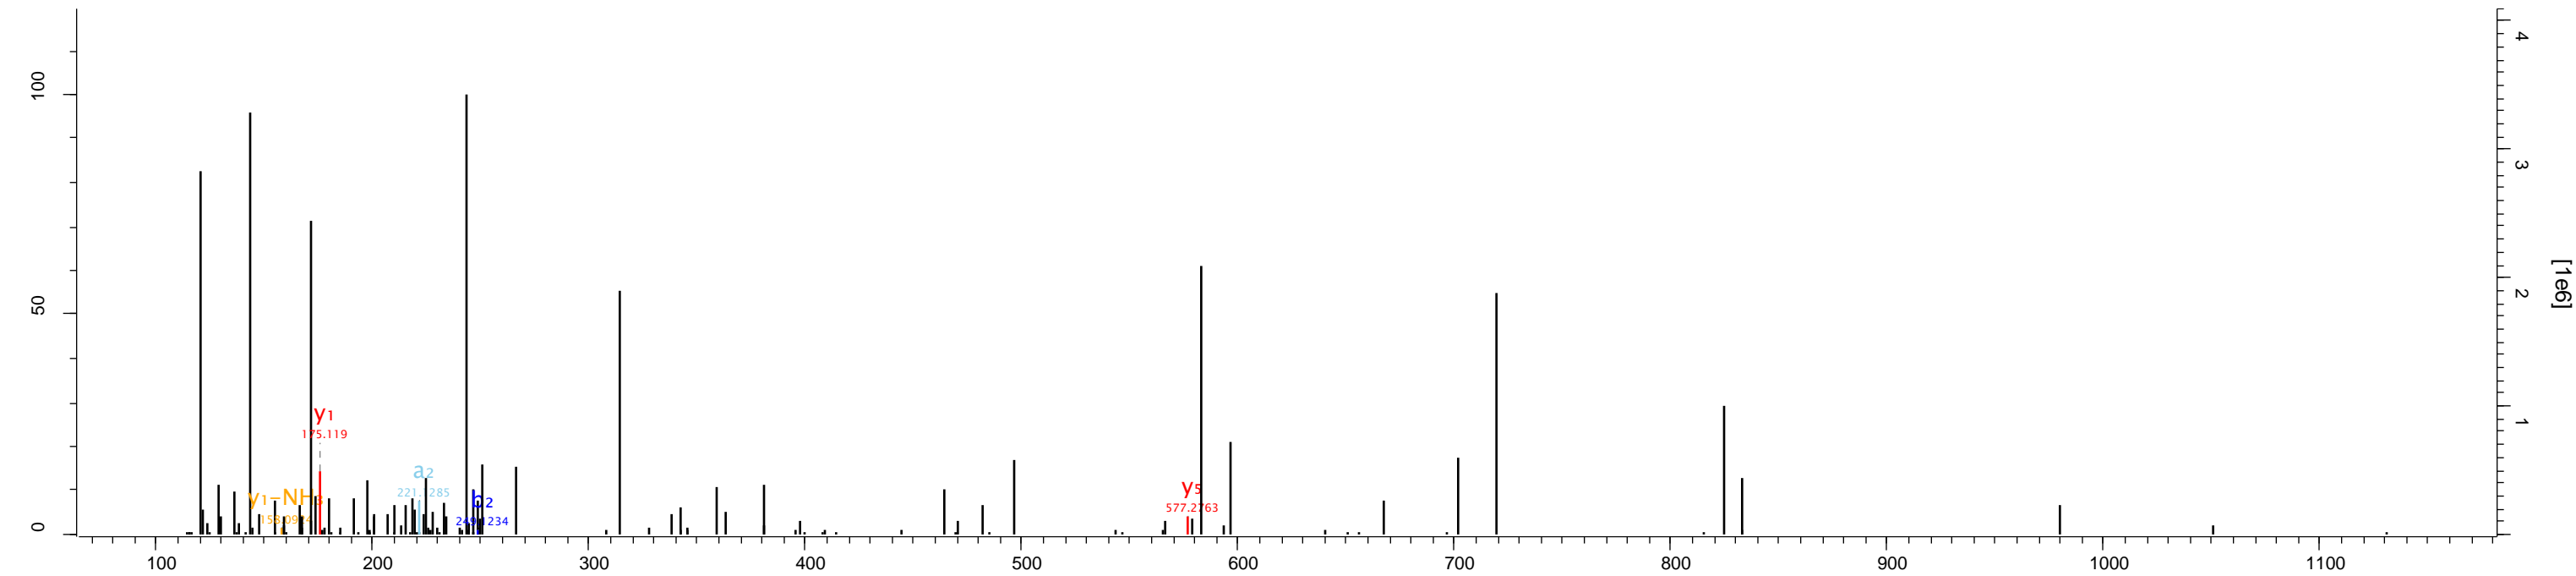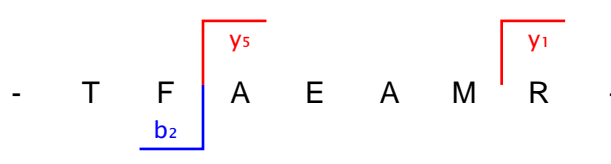

Raw file 20140827\_EXQ00\_FaHo\_SA\_BRE2\_01 Scan 4213 Method FTMS; HCD Score 63.62 m/z 568.79 Gene names VMA5

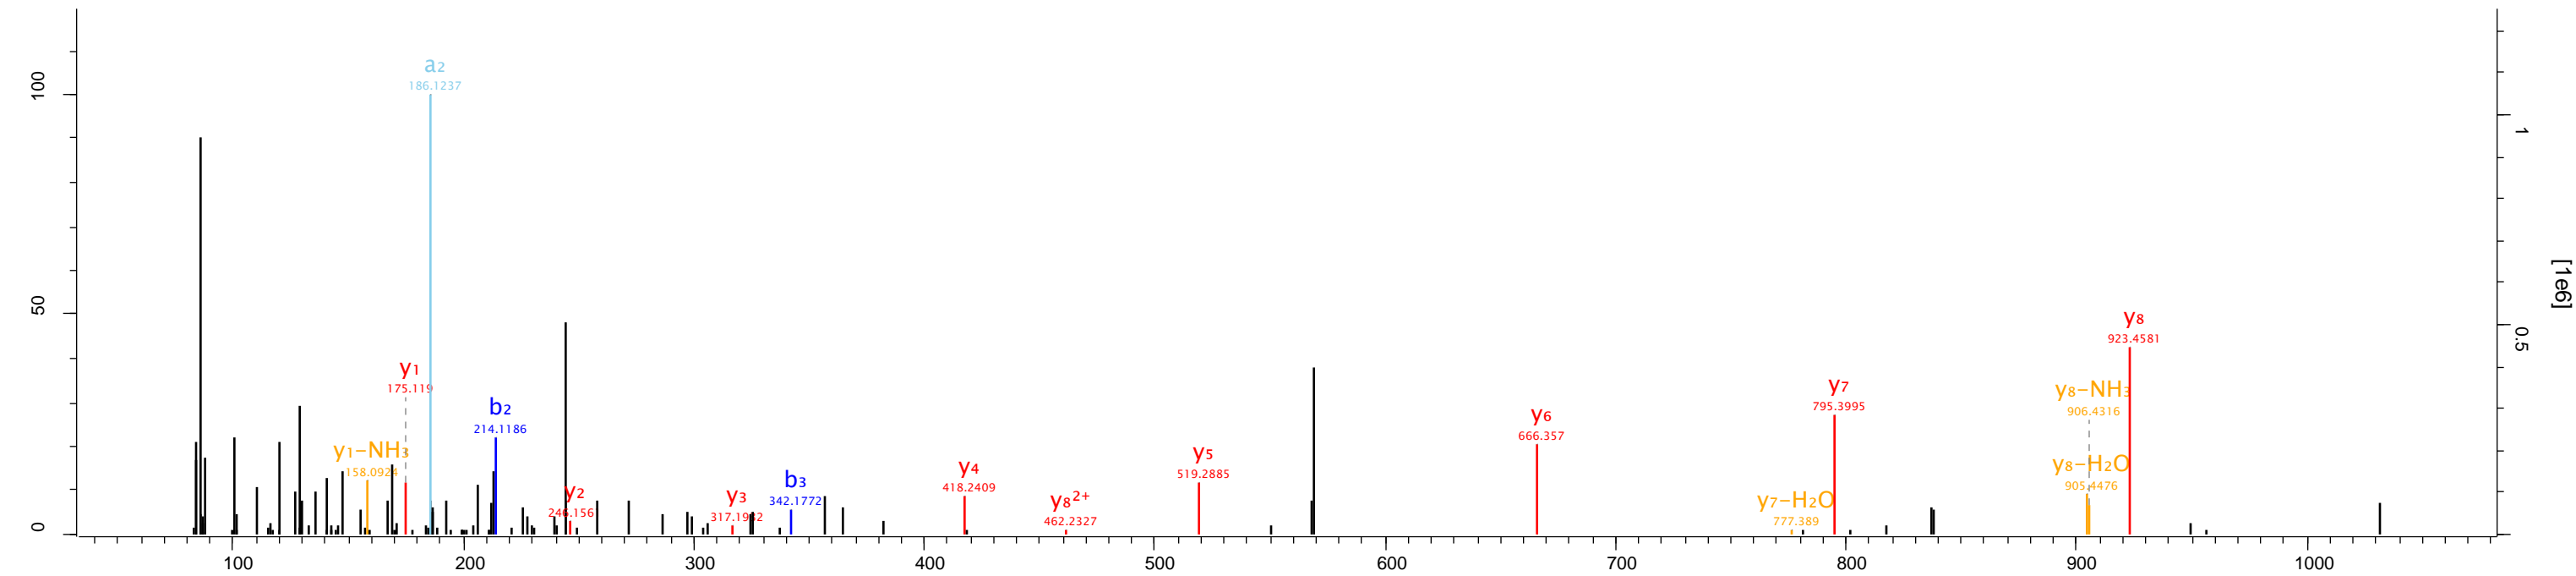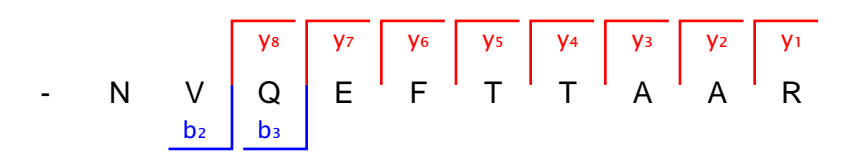

Raw file 20140827\_EXQ00\_FaHo\_SA\_BRE2\_01 Scan 4500 Method FTMS; HCD Score 95.42 m/z 652.83 Gene names HMF1

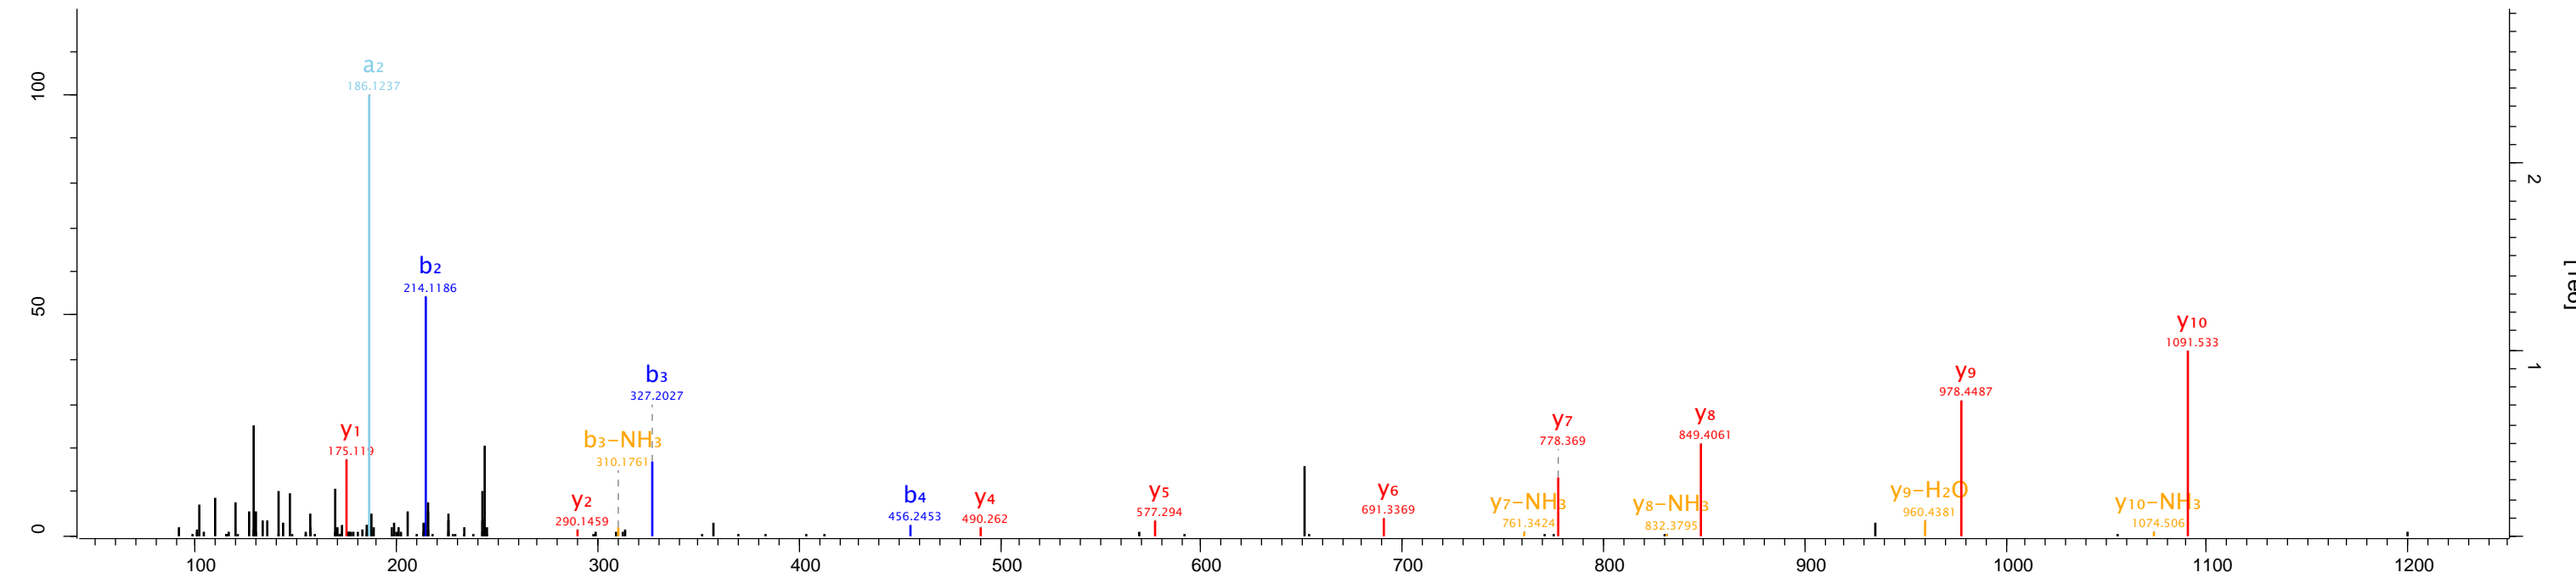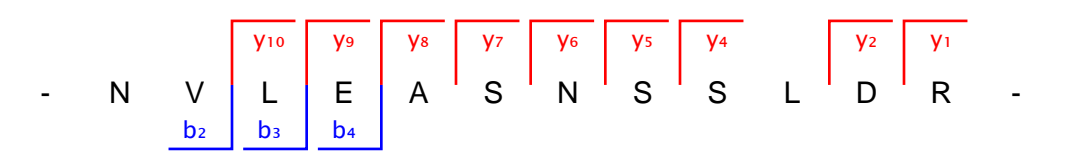

Raw file 20140827\_EXQ00\_FaHo\_SA\_BRE2\_02 Scan 5234 Method FTMS; HCD Score 208.39 m/z 773.41 Gene names RPL36A;RPL36B

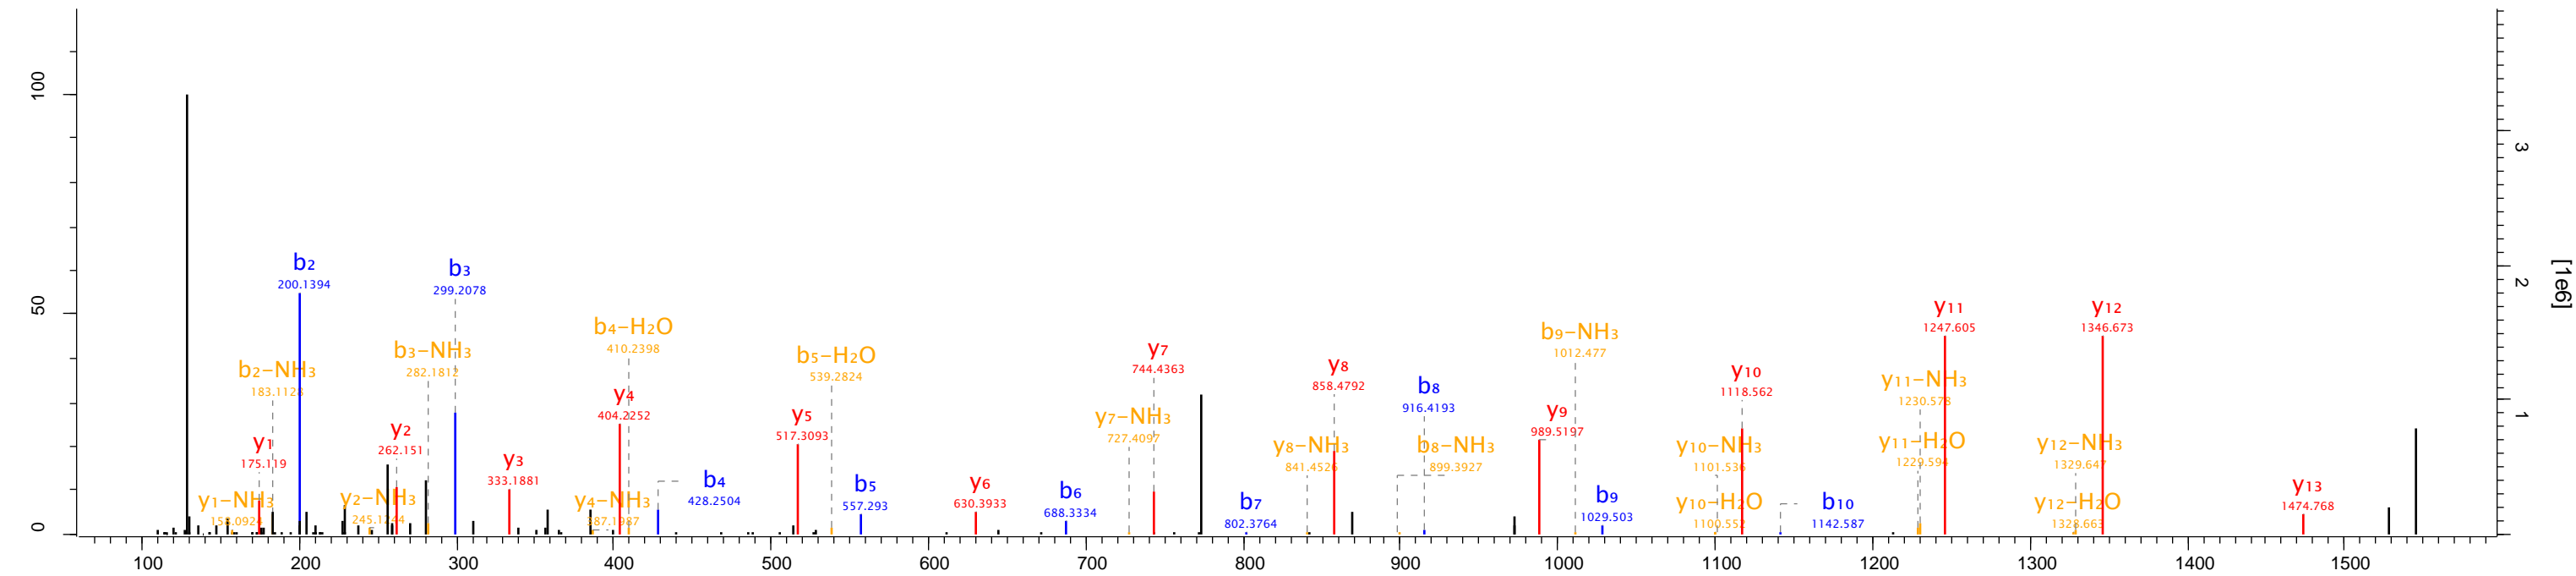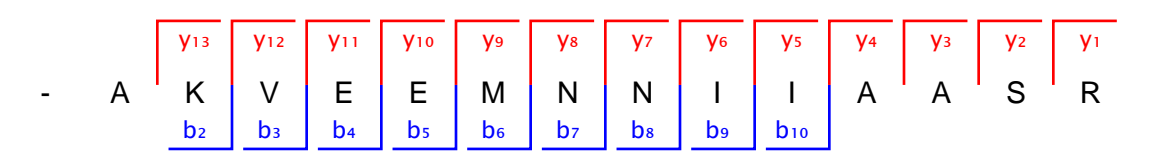

Raw file 20140827\_EXQ00\_FaHo\_SA\_BRE2\_02 Scan 6351 Method FTMS; HCD Score 68.41 m/z 896.44 Gene names CYT1

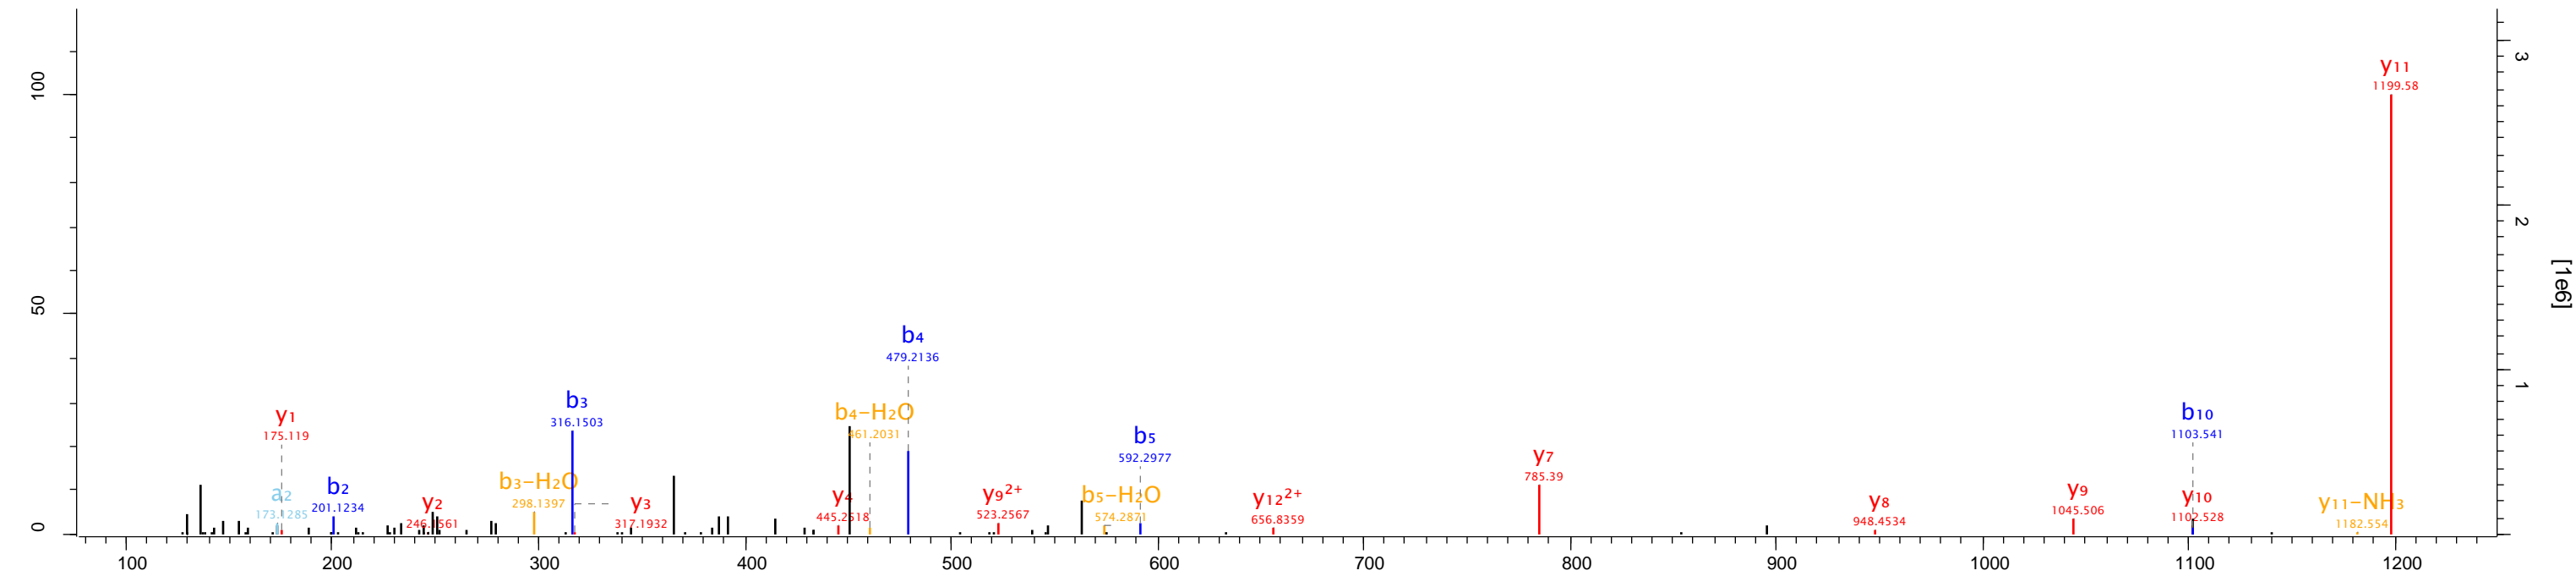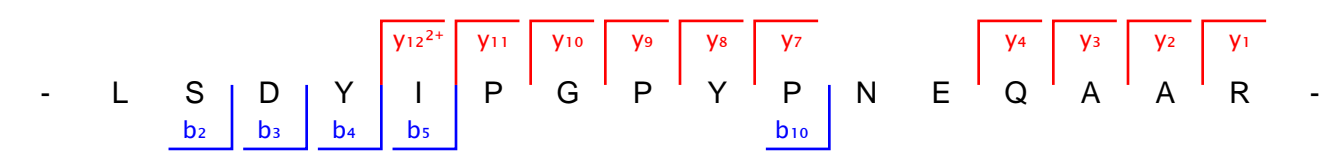

Raw file: 20140827\_EXQ00\_FaHo\_SA\_BRE2\_02  
 Scan: 6442 Method: FTMS; HCD Score: 117.93 m/z: 687.35 Gene names: ERV25

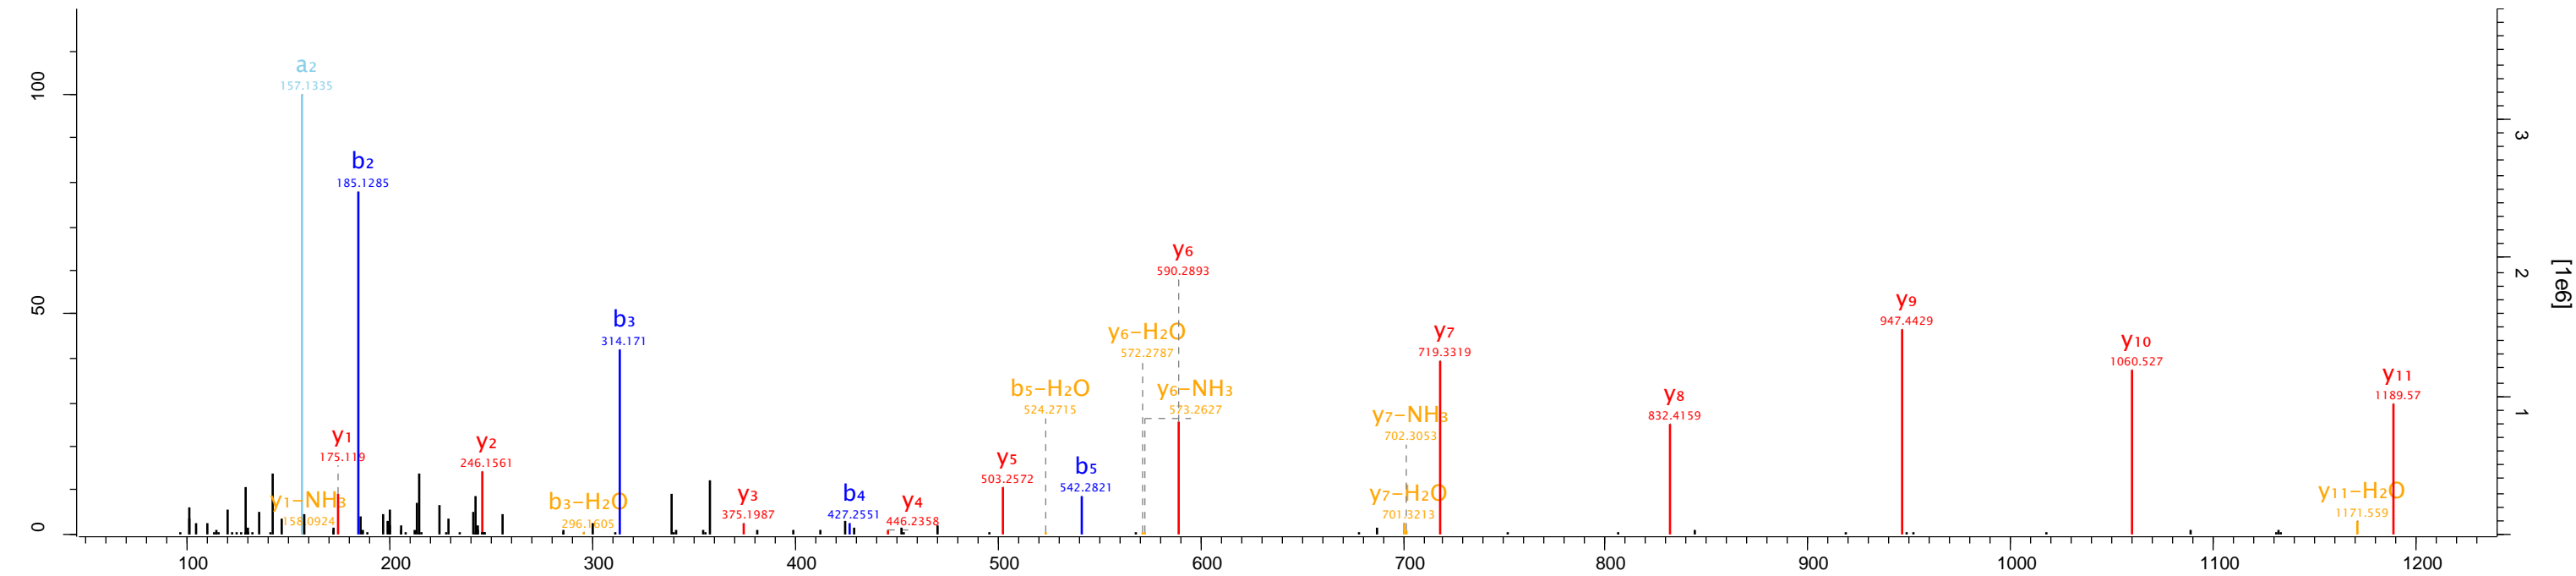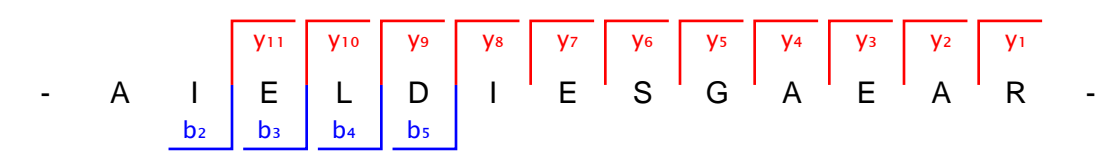

Raw file 20140827\_EXQ00\_FaHo\_SA\_BRE2\_02 Scan 8525 Method FTMS; HCD Score 69.98 m/z 900.45 Gene names NPT1

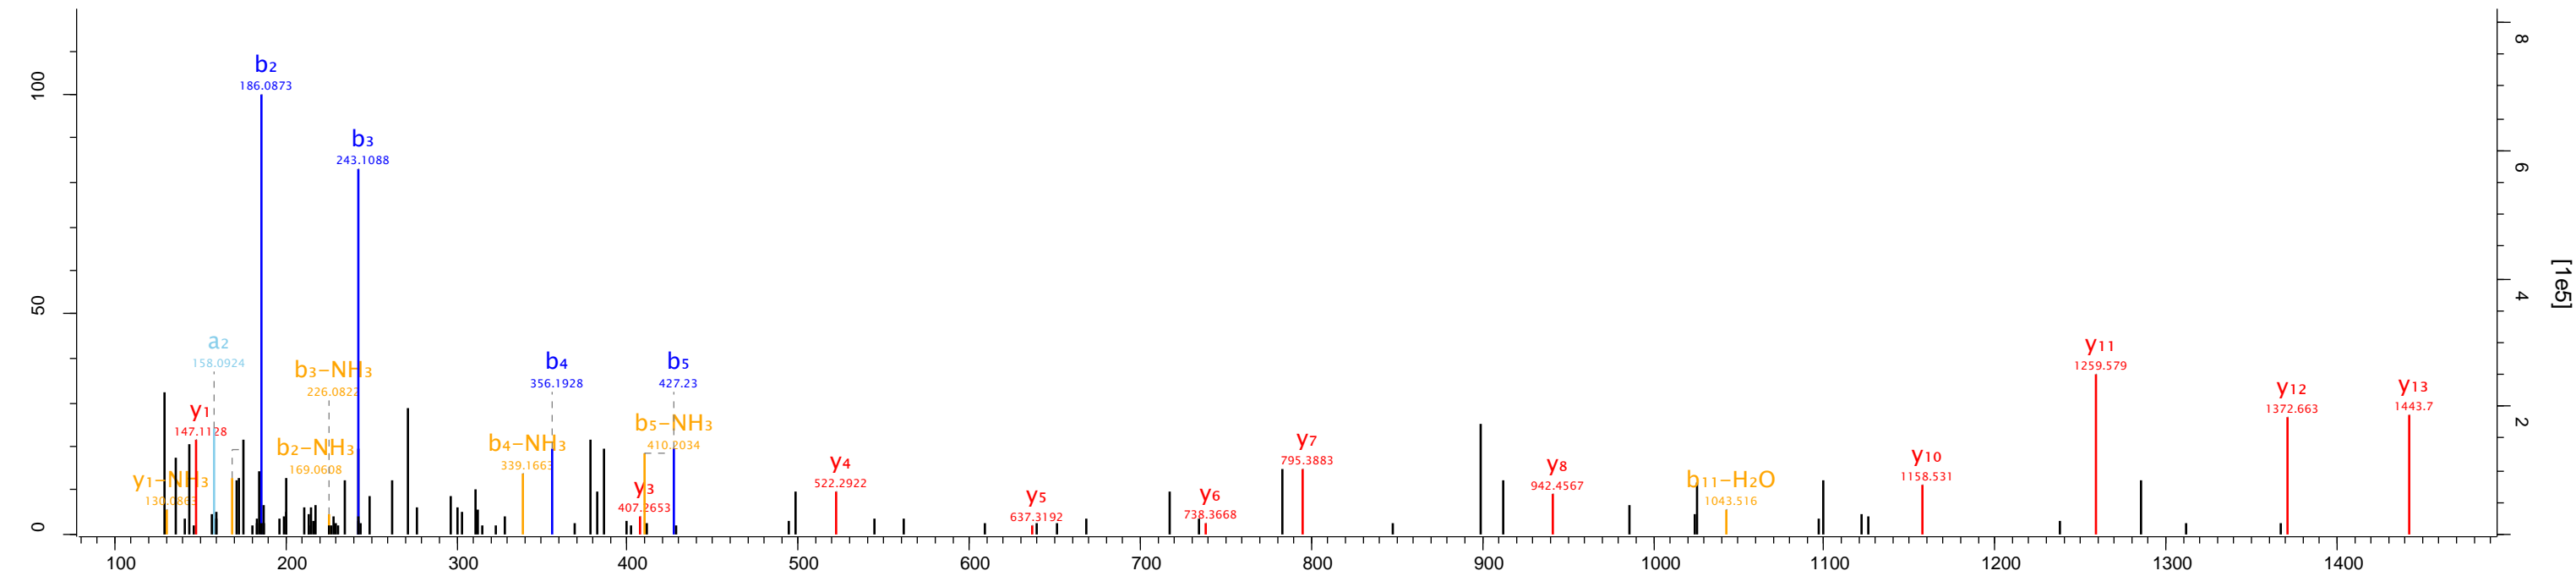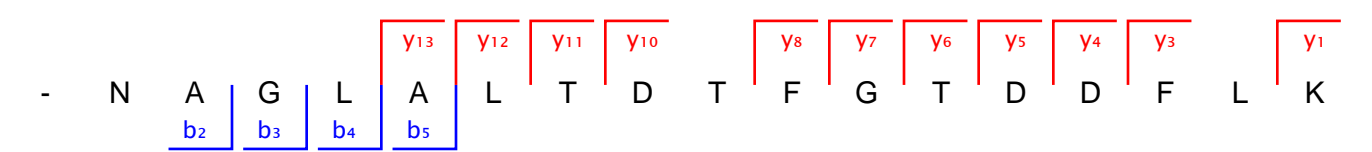



Raw file  
20140827\_EXQ00\_FaHo\_SA\_BRE2\_03

Scan Method Score m/z Gene names  
4027 FTMS; HCD 70.89 668.55 ERV46

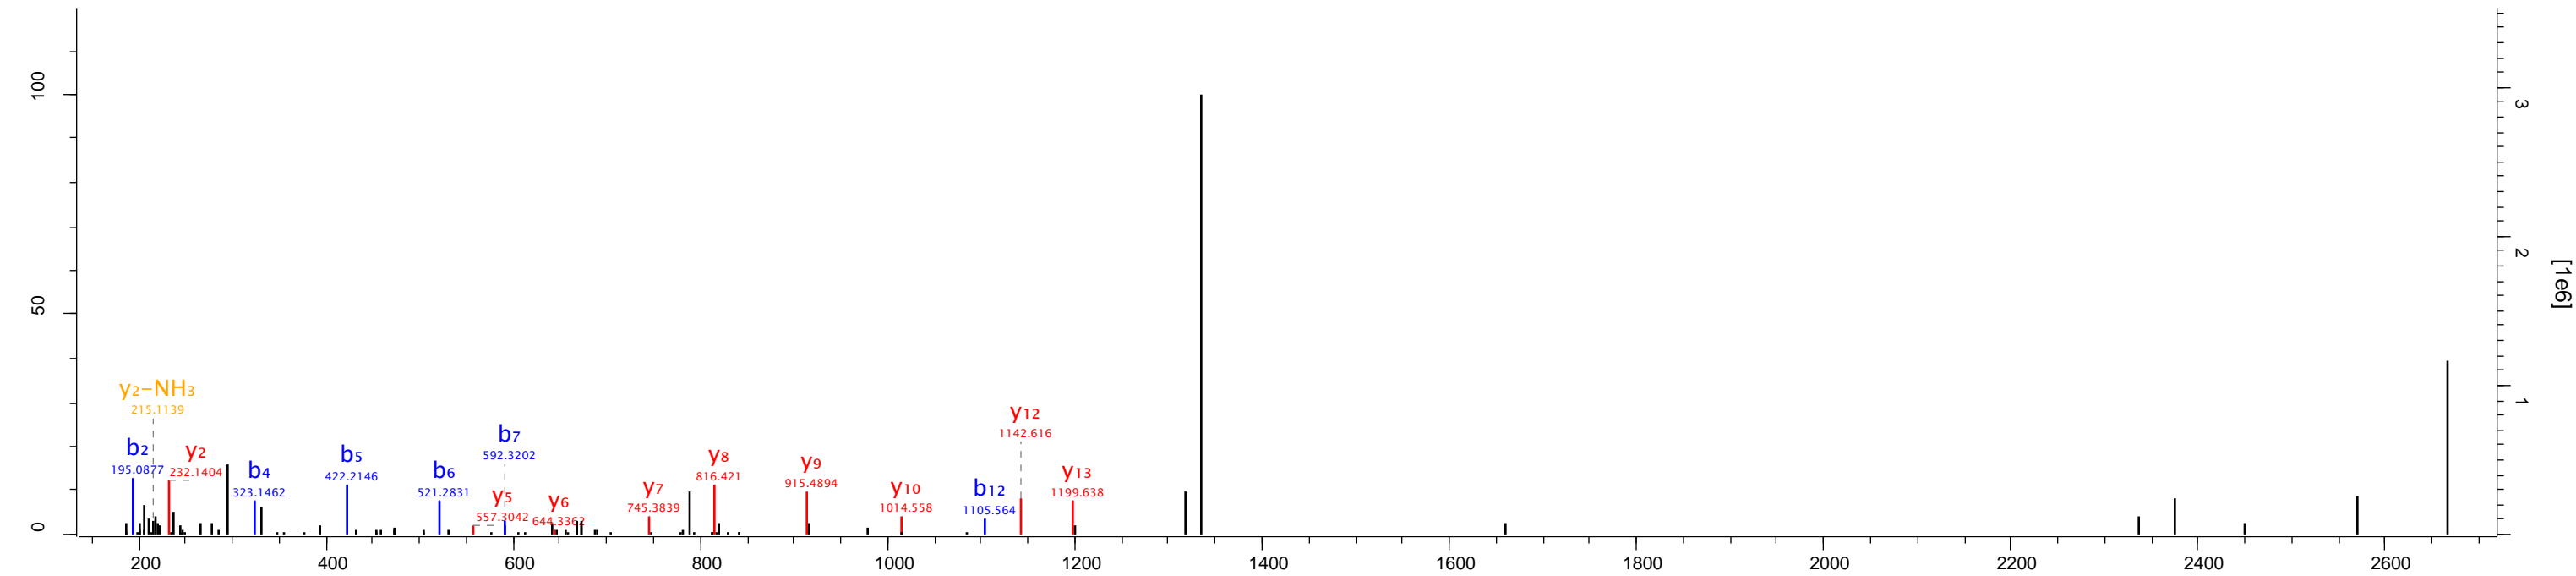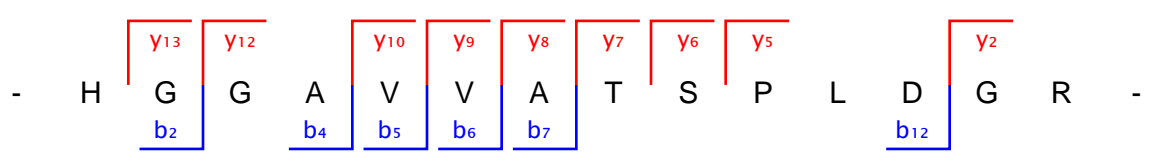

Raw file: 20140827\_EXQ00\_FaHo\_SA\_BRE2\_03  
 Scan: 6024 Method: FTMS; HCD Score: 87.32 m/z: 523.26 Gene names: PDR5;PDR15

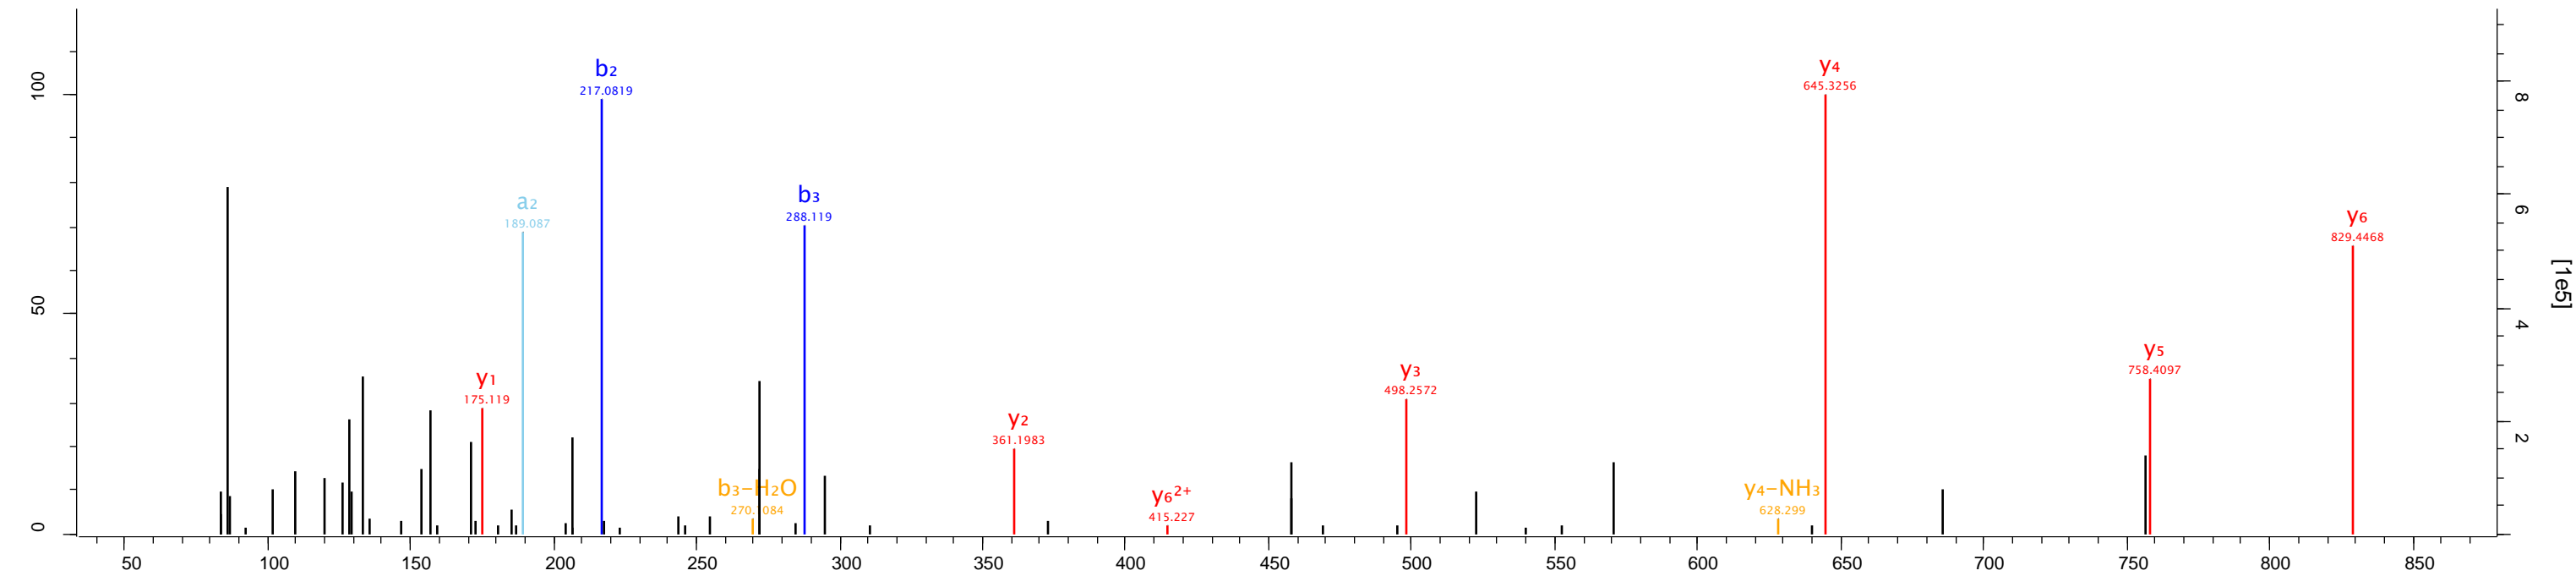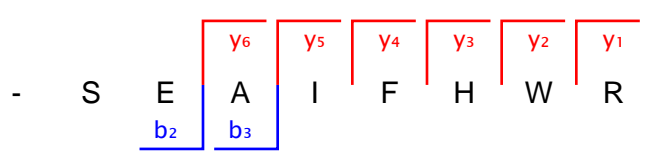

Raw file 20140827\_EXQ00\_FaHo\_SA\_BRE2\_03 Scan 6097 Method FTMS; HCD Score 86.88 m/z 442.25 Gene names AAC1

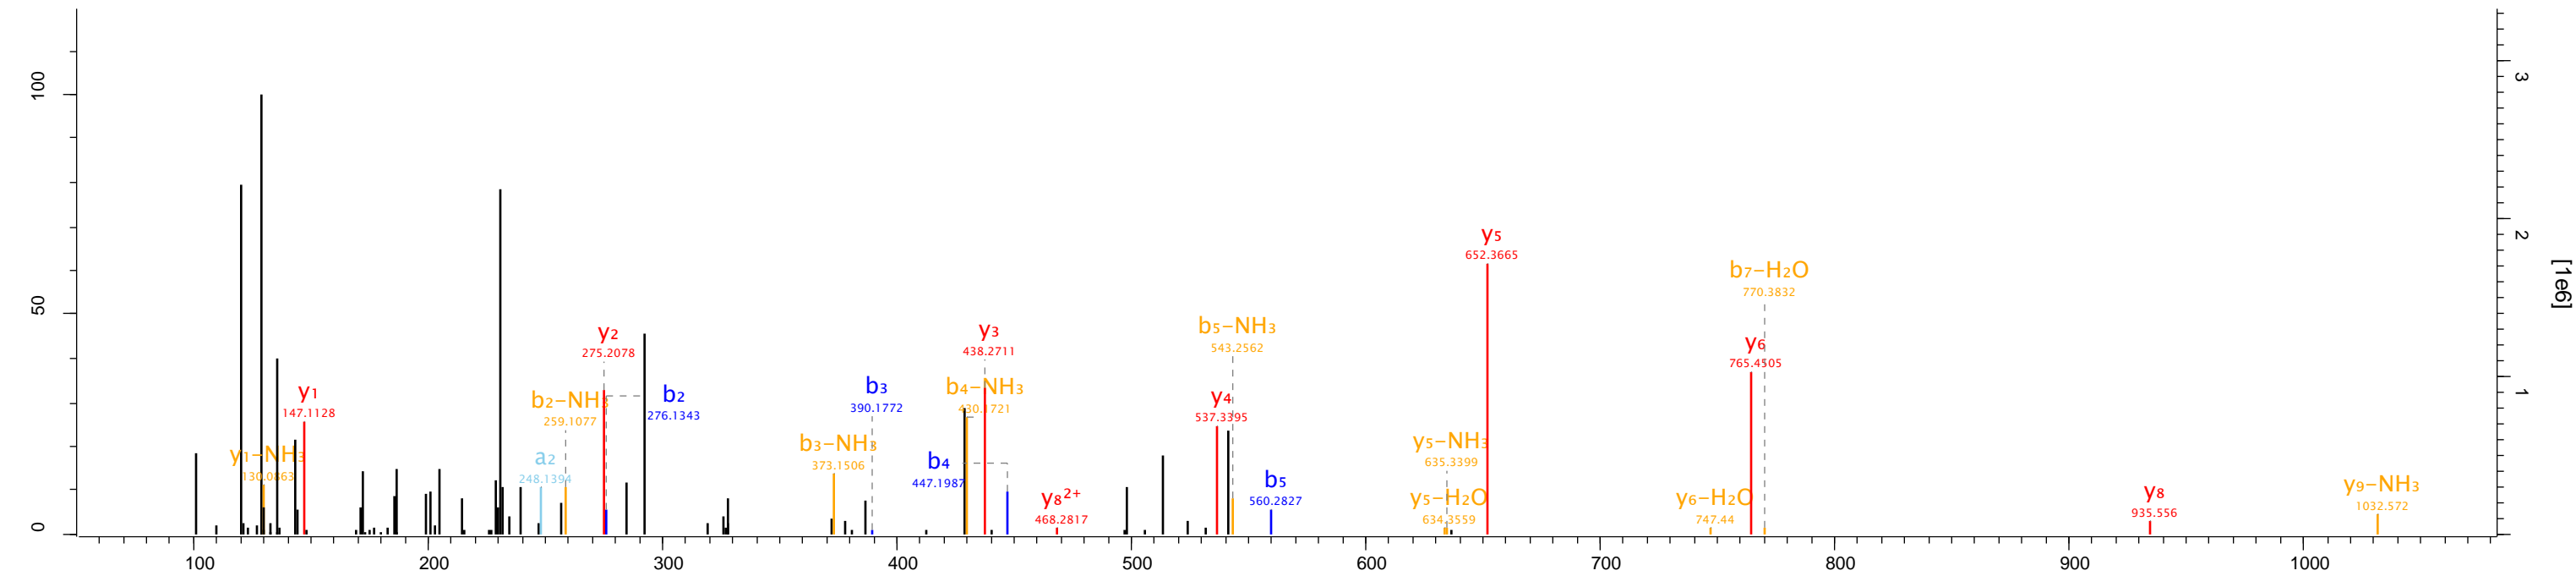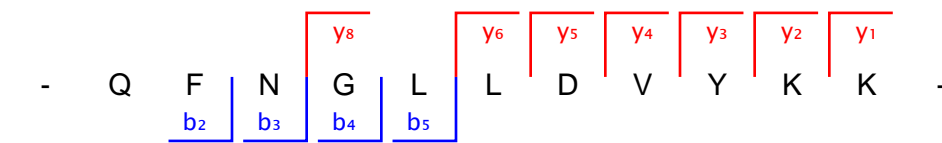

Raw file 20140827\_EXQ00\_FaHo\_SA\_BRE2\_03 Scan 8347 Method FTMS; HCD Score 124.6 m/z 646.85 Gene names PDR5;PDR15

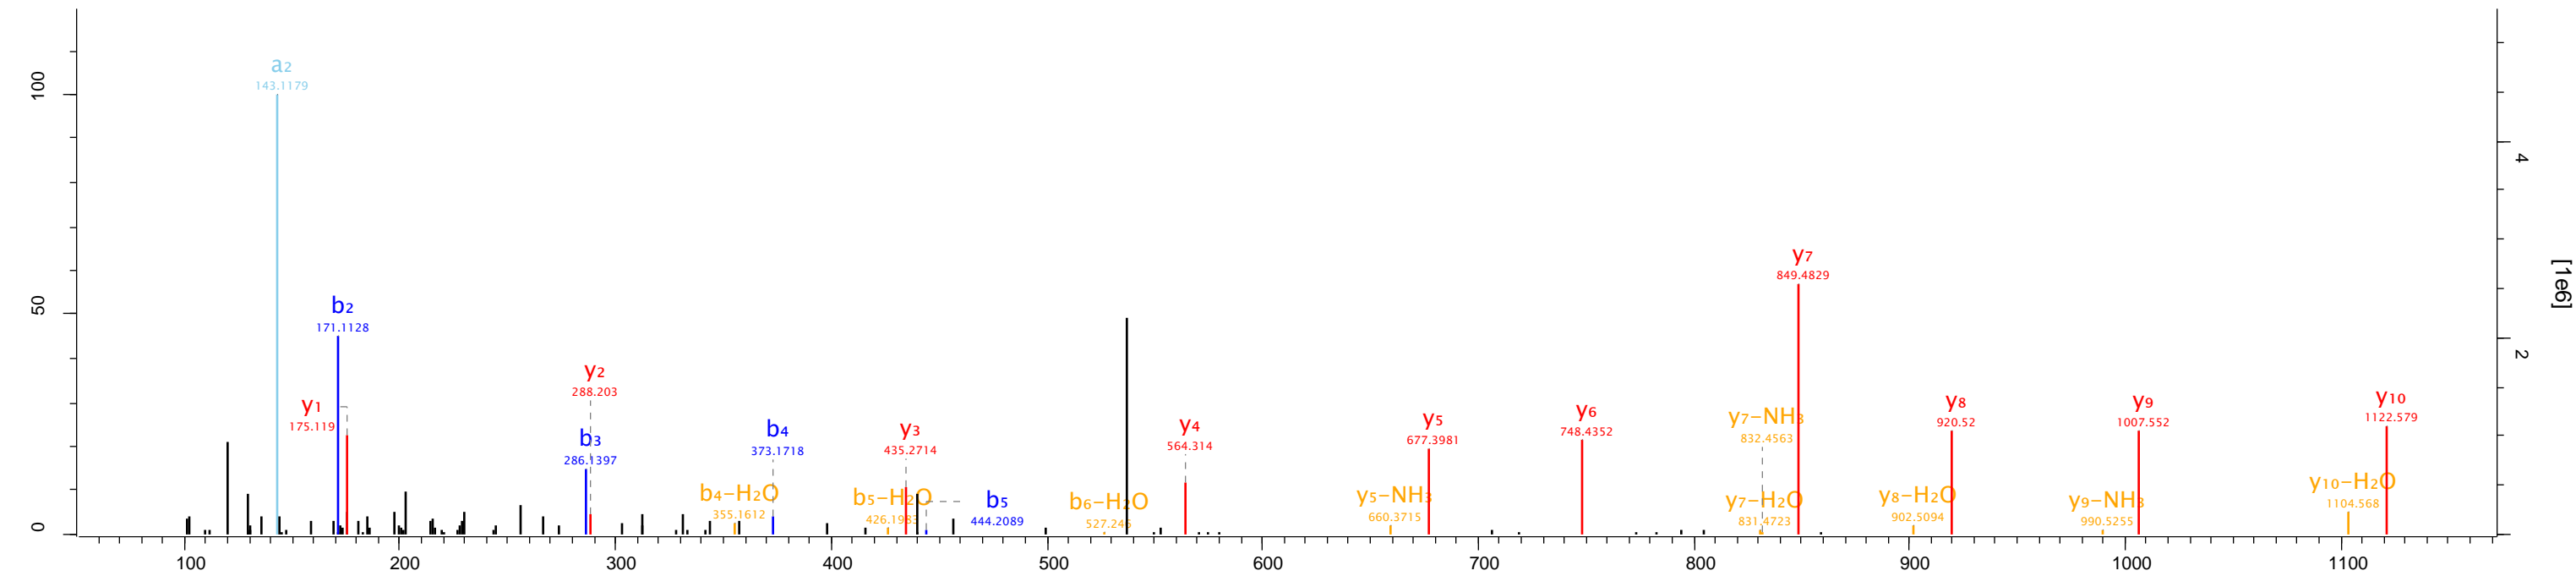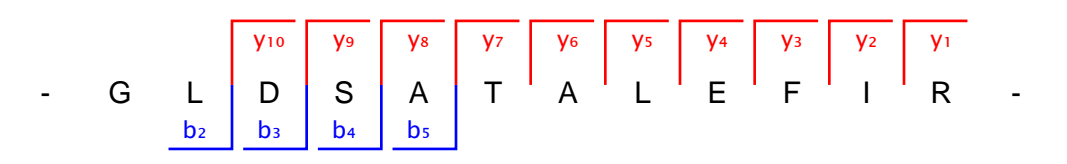

Raw file: 20140827\_EXQ00\_FaHo\_SA\_CT16\_03  
 Scan: 1654 Method: FTMS; HCD Score: 74.42 m/z: 359.2 Gene names: RPL21A;RPL21B

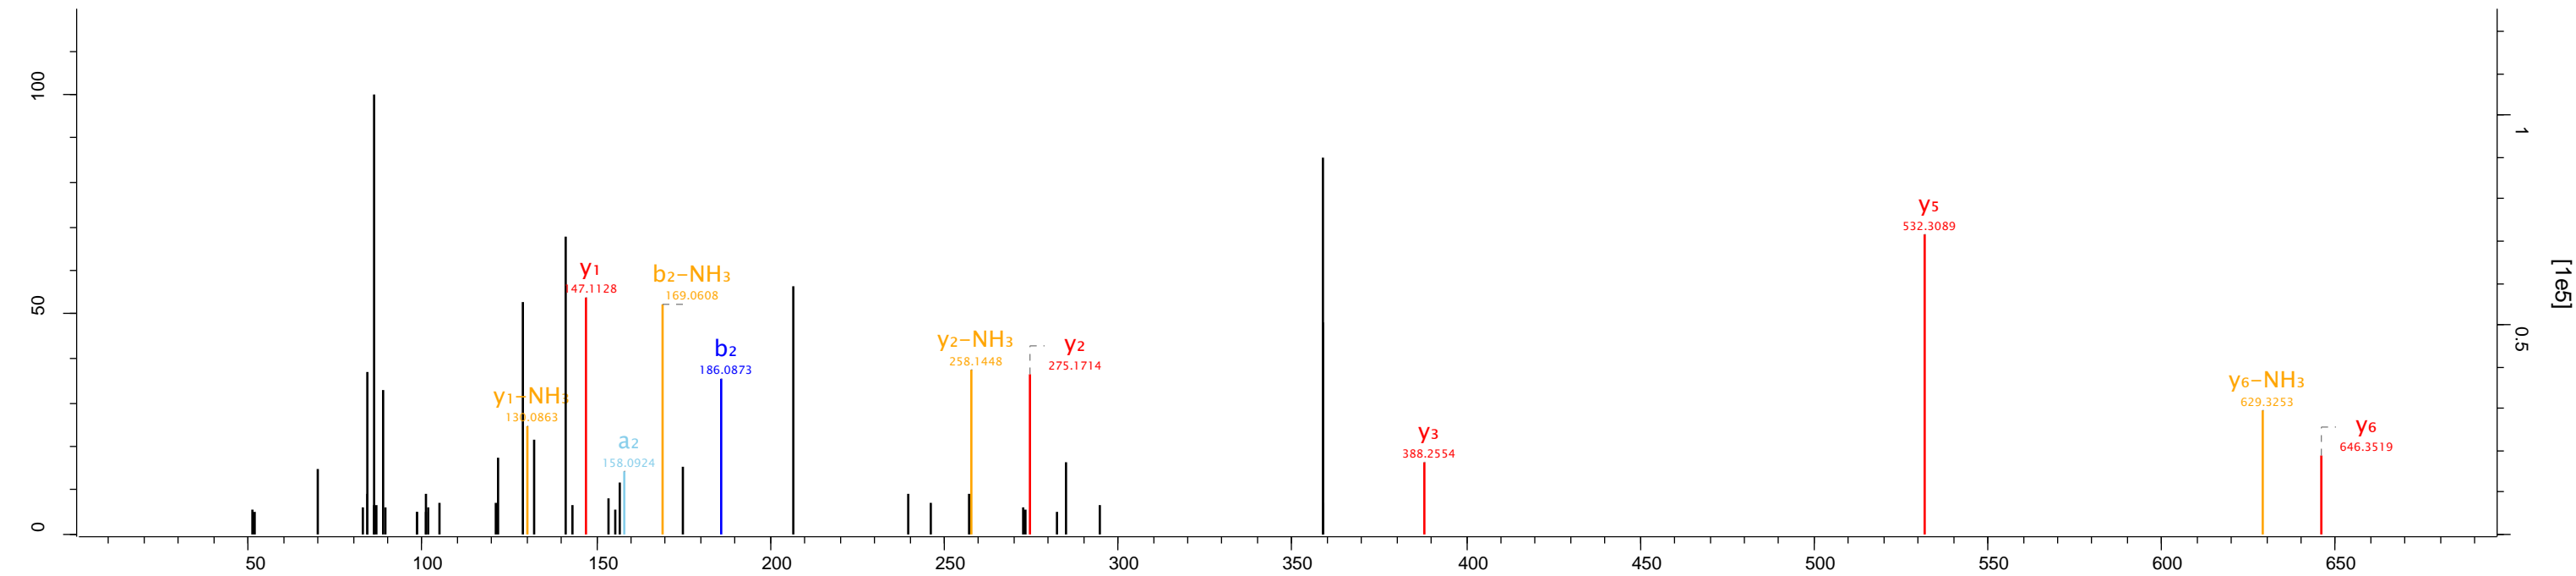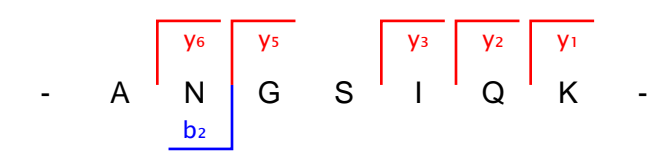

Raw file 20140827\_EXQ00\_FaHo\_SA\_CT16\_03 Scan 2759 Method FTMS; HCD Score 114.02 m/z 367.21

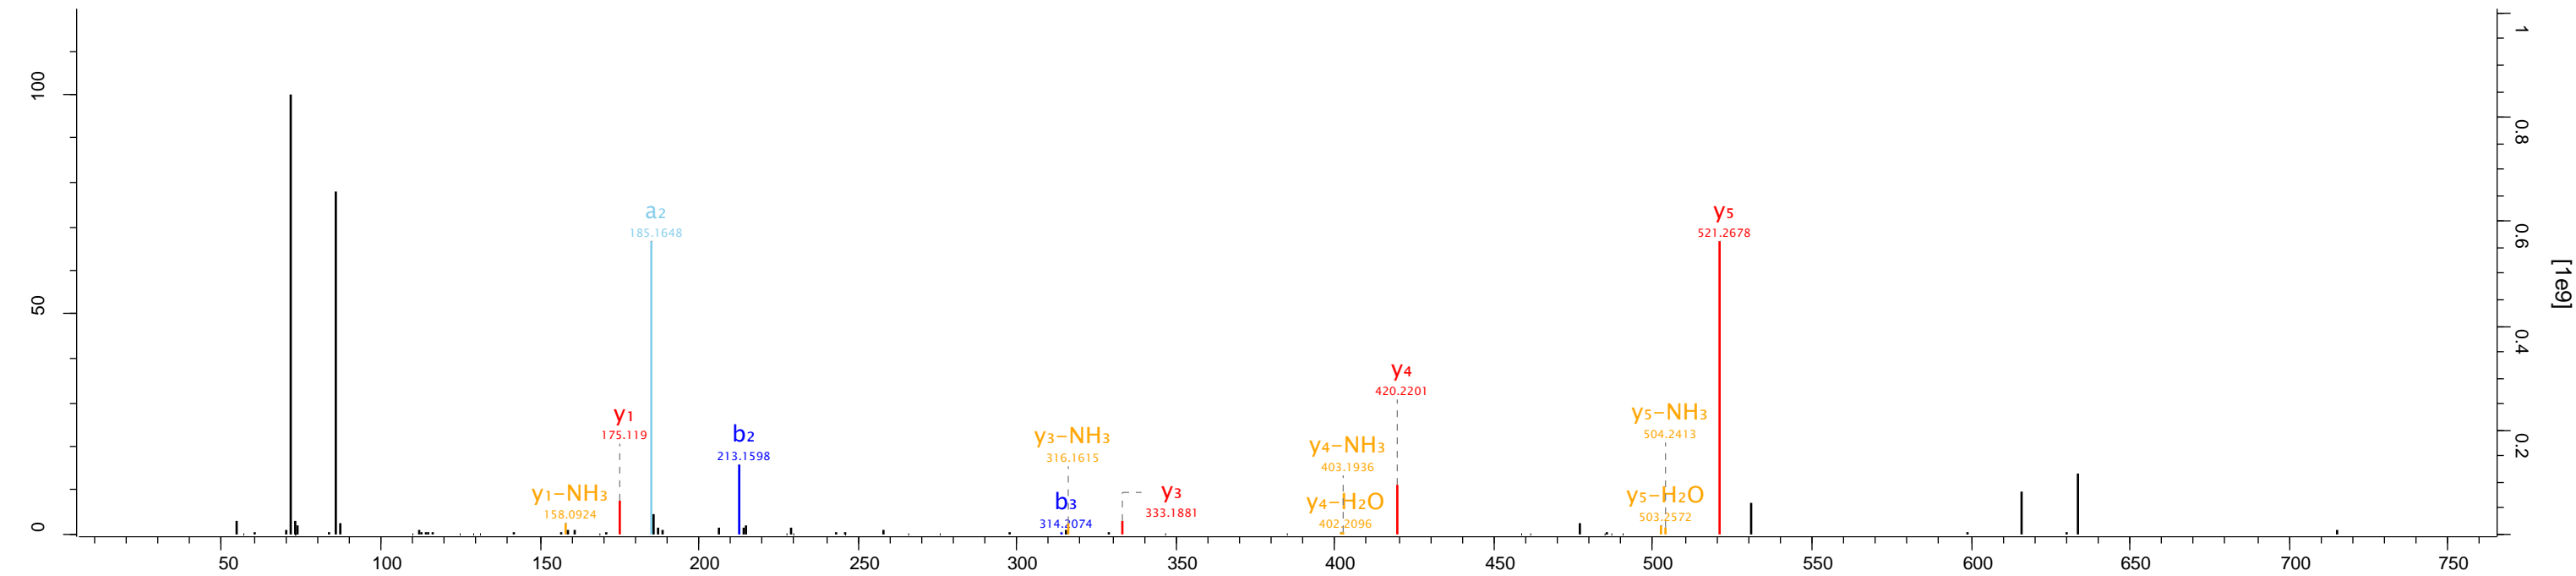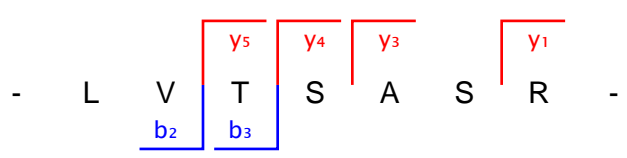

Raw file 20140827\_EXQ00\_FaHo\_SA\_CT16\_03 Scan 3274 Method FTMS; HCD Score 81.66 m/z 653.33 Gene names TPM1

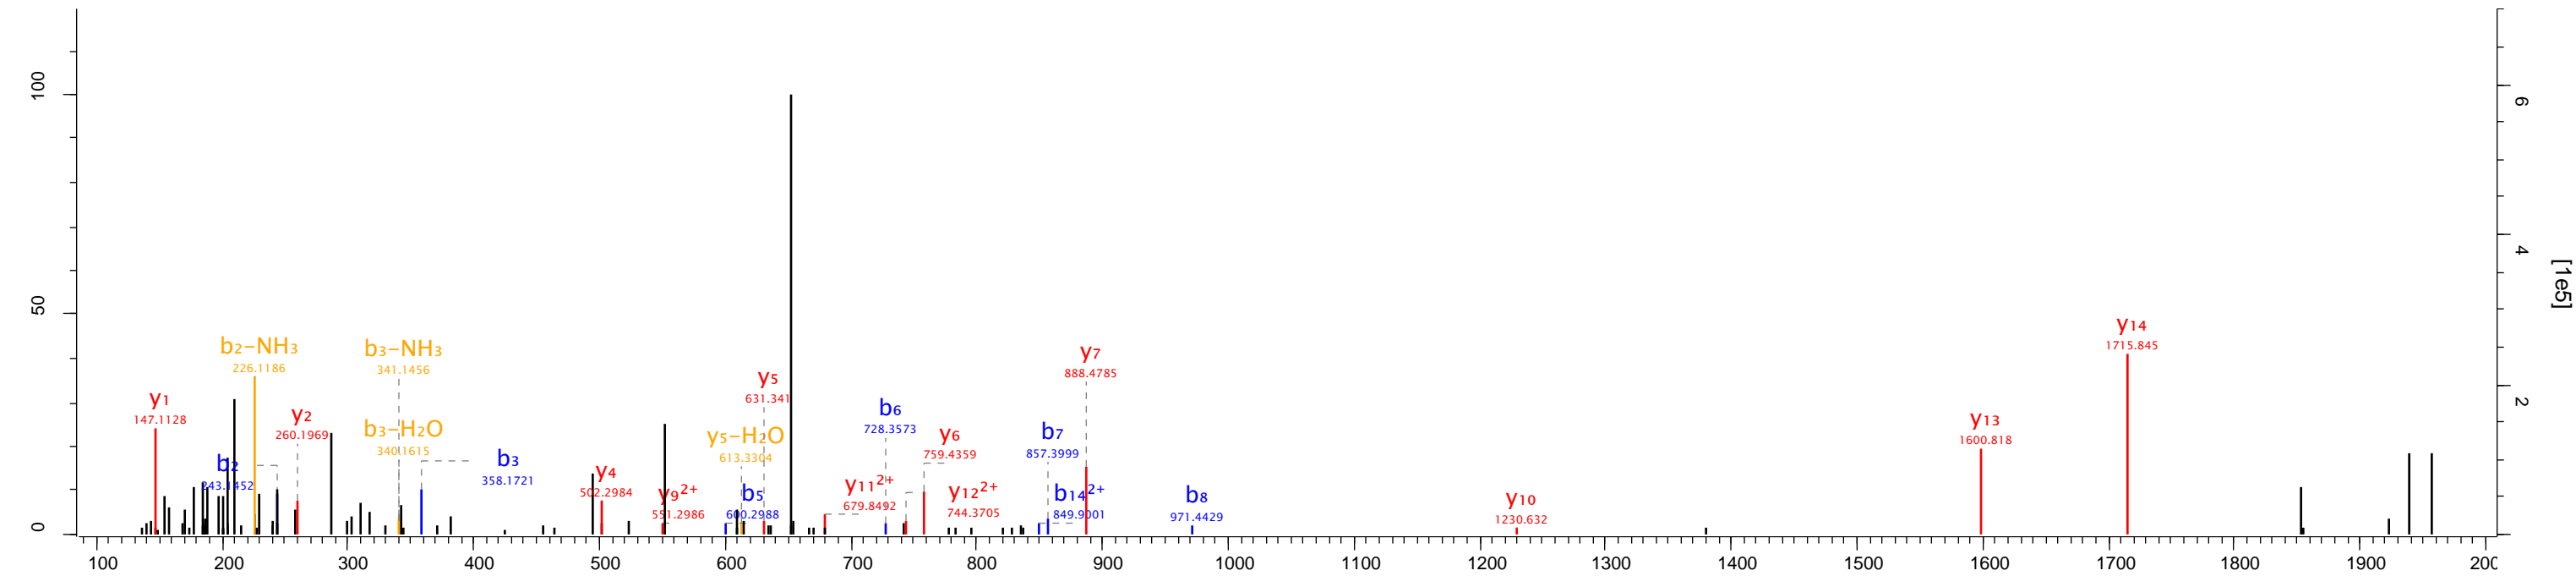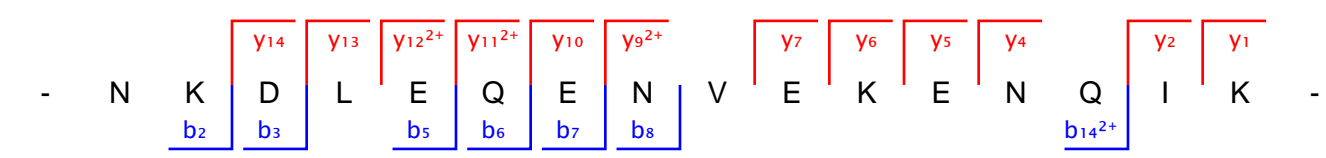

Raw file

Scan Method Score m/z Gene names

20140827\_EXQ00\_FaHo\_SA\_EAF3\_01

3548 FTMS; HCD 70.29 701.83 TY1B-LR3;TY1A-PL;TY1A-LR2;TY1A-ER1;TY1A-DR6;TY1B-OL;TY1B-LR4;TY1B-LR2;TY1B-PL;TY1B-ER1;TY1B-PR3;TY1A-PR1;TY1A-A;TY1A-DR4

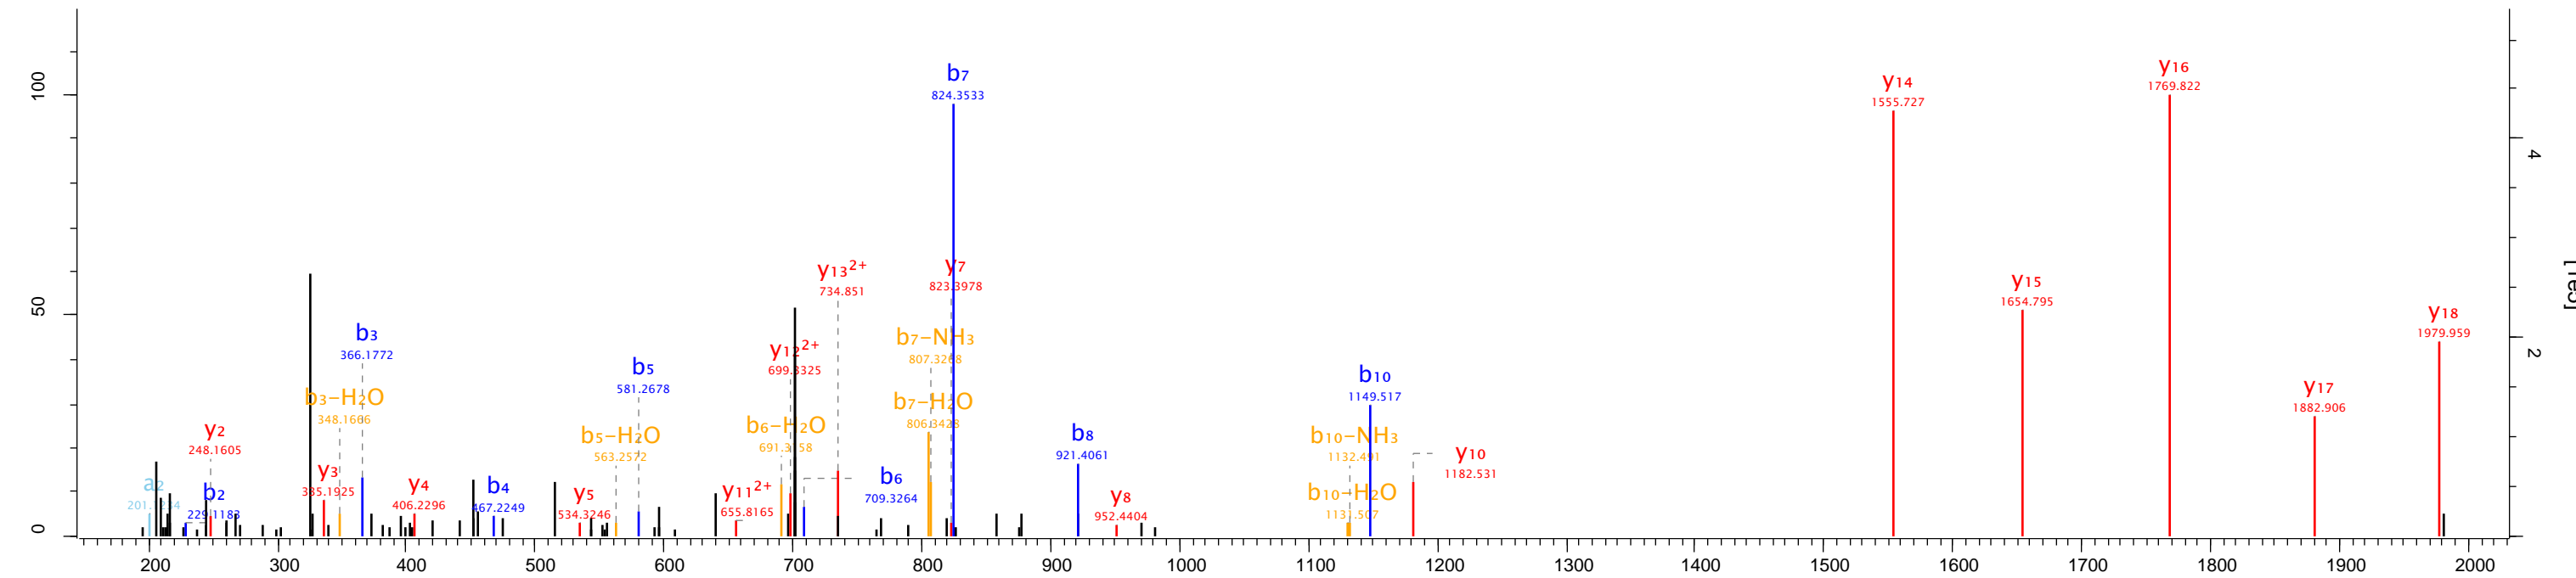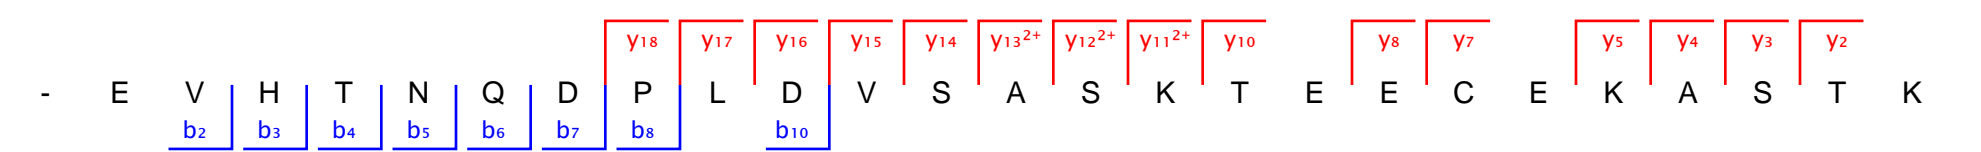



Raw file Scan Method Score m/z Gene names  
 20140827\_EXQ00\_FaHo\_SA\_EAF3\_01 3957 FTMS; HCD 89.23 507.26 TY1B-LR3;TY1B-OL;TY1B-LR4;TY1B-LR2;TY1B-PL;TY1B-ER1;TY1B-PR3;TY1B-H;TY1B-GR2;TY1B-MR2;TY1B-ER2;TY1B-OR;TY1B-BR;TY1B-DR1;TY1B-NL2;TY1B-LR1;TY1B-DR3;TY1B-NL1;TY1B-A;TY1B-BL;TY1B-MR1

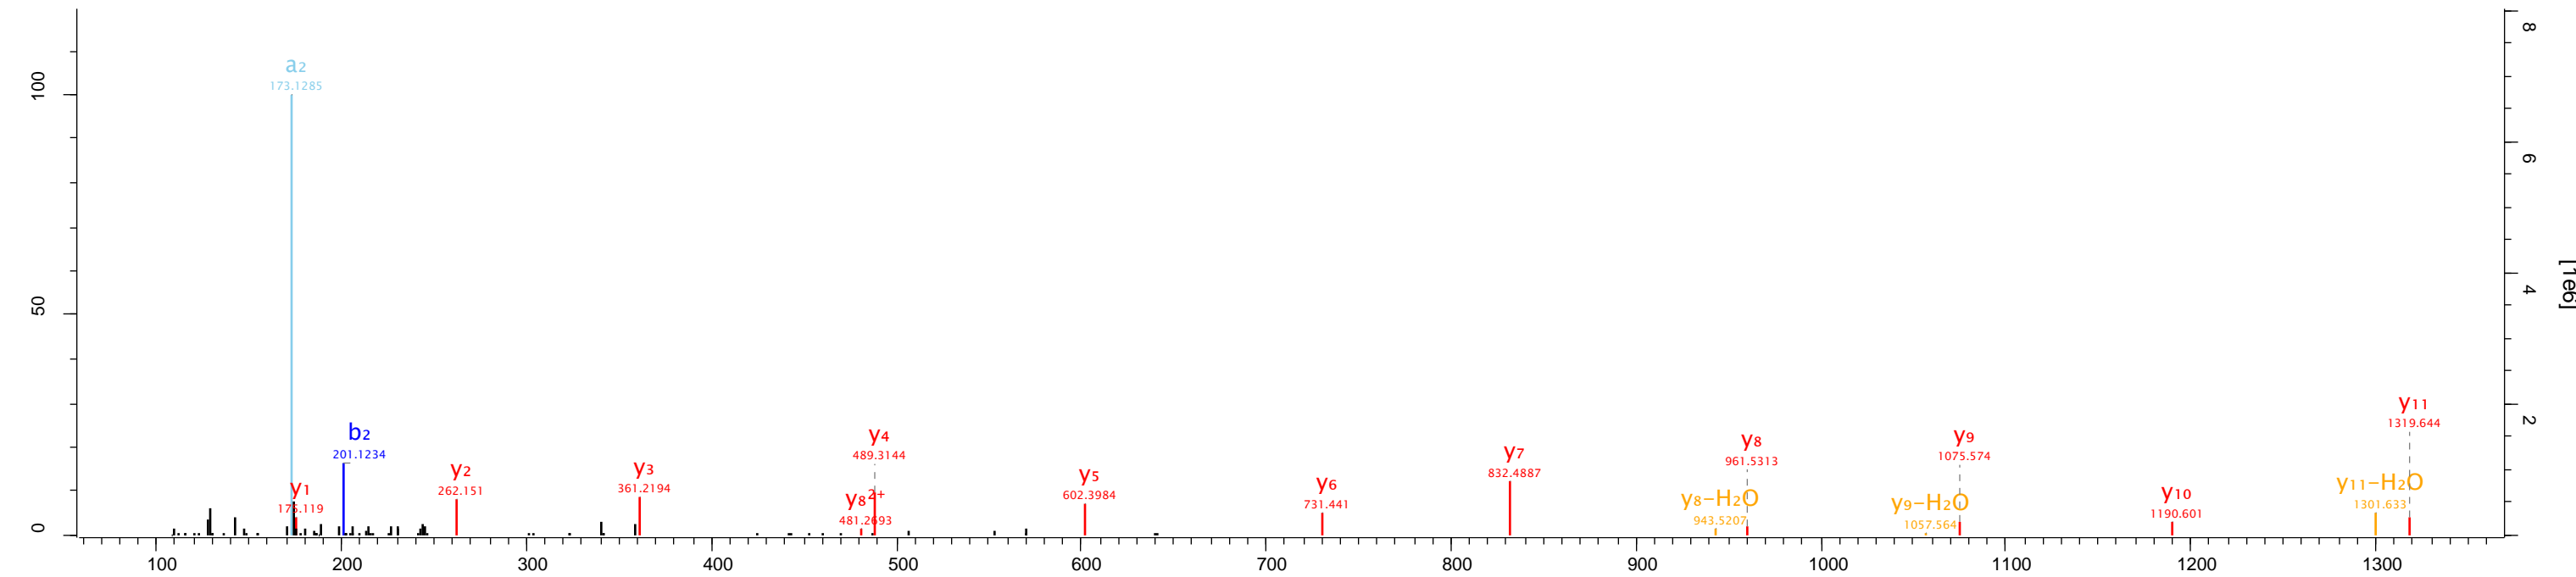

- S L E D N E T E I K V S R -

Fragmentation diagram showing b and y ions for the peptide sequence: S L E D N E T E I K V S R. The b2 ion is shown below the L residue. The y1 through y11 ions are shown above the E, D, N, E, T, E, I, K, V, S, R residues respectively.

Raw file 20140827\_EXQ00\_FaHo\_SA\_EAF3\_01 Scan Method FTMS; HCD Score 79.65 m/z 778.85 Gene names TY1B-LR3;TY1B-OL;TY1B-LR4;TY1B-LR2;TY1B-PL;TY1B-ER1;TY1B-PR3;TY1B-H;TY1B-GR2;TY1B-MR2;TY1B-ER2;TY1B-OR;TY1B-BR;TY1B-DR1;TY1B-NL2;TY1B-LR1;TY1B-DR3;TY1B-NL1;TY1B-A;TY1B-BL;TY1B-MR1

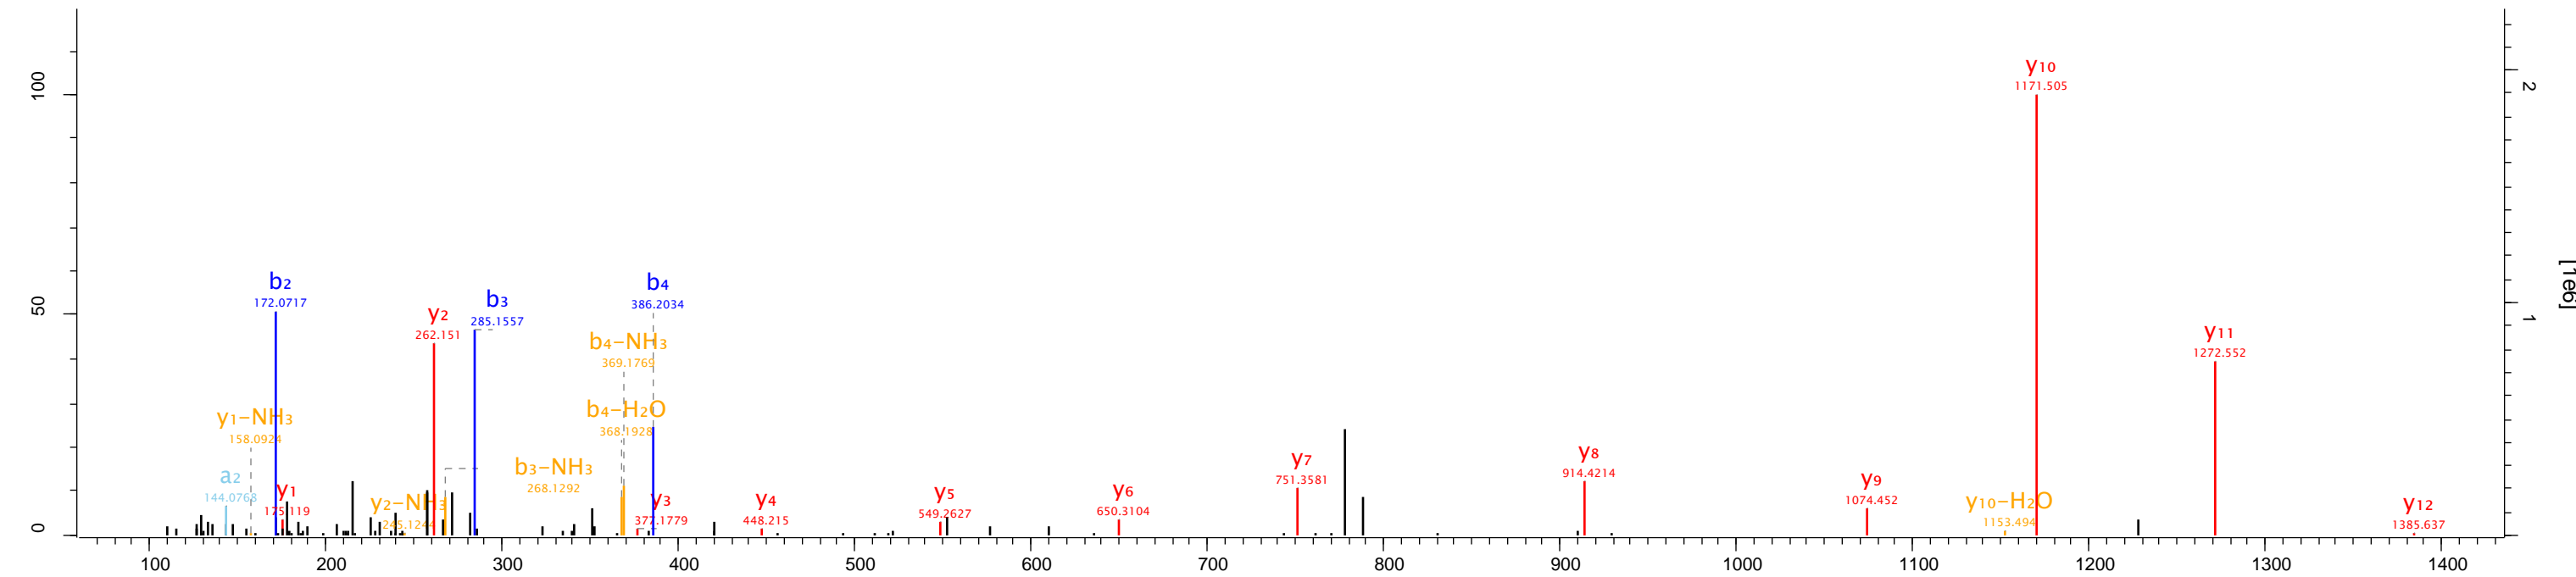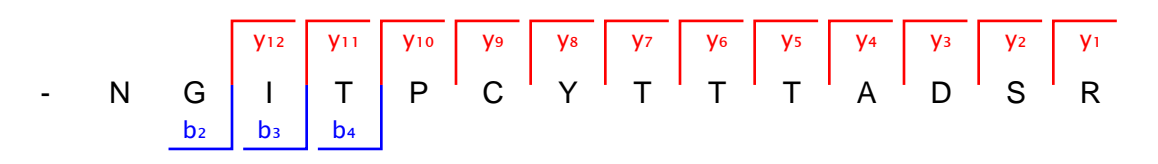

Raw file Scan Method Score m/z Gene names  
20140827\_EXQ00\_FaHo\_SA\_EAF3\_01 4562 FTMS; HCD 94.66 432.79 TY1B-OL;TY1B-LR4;TY1B-LR2;TY1B-PL;TY1B-ER1;TY1B-PR3;TY1B-H;TY1B-GR2;TY1B-MR2;TY1B-ER2;TY1B-OR;TY1B-BR;TY1B-DR1;TY1B-NL2;TY1B-LR1;TY1B-DR3;TY1B-NL1;TY1B-A;TY1B-BL;TY1B-MR1

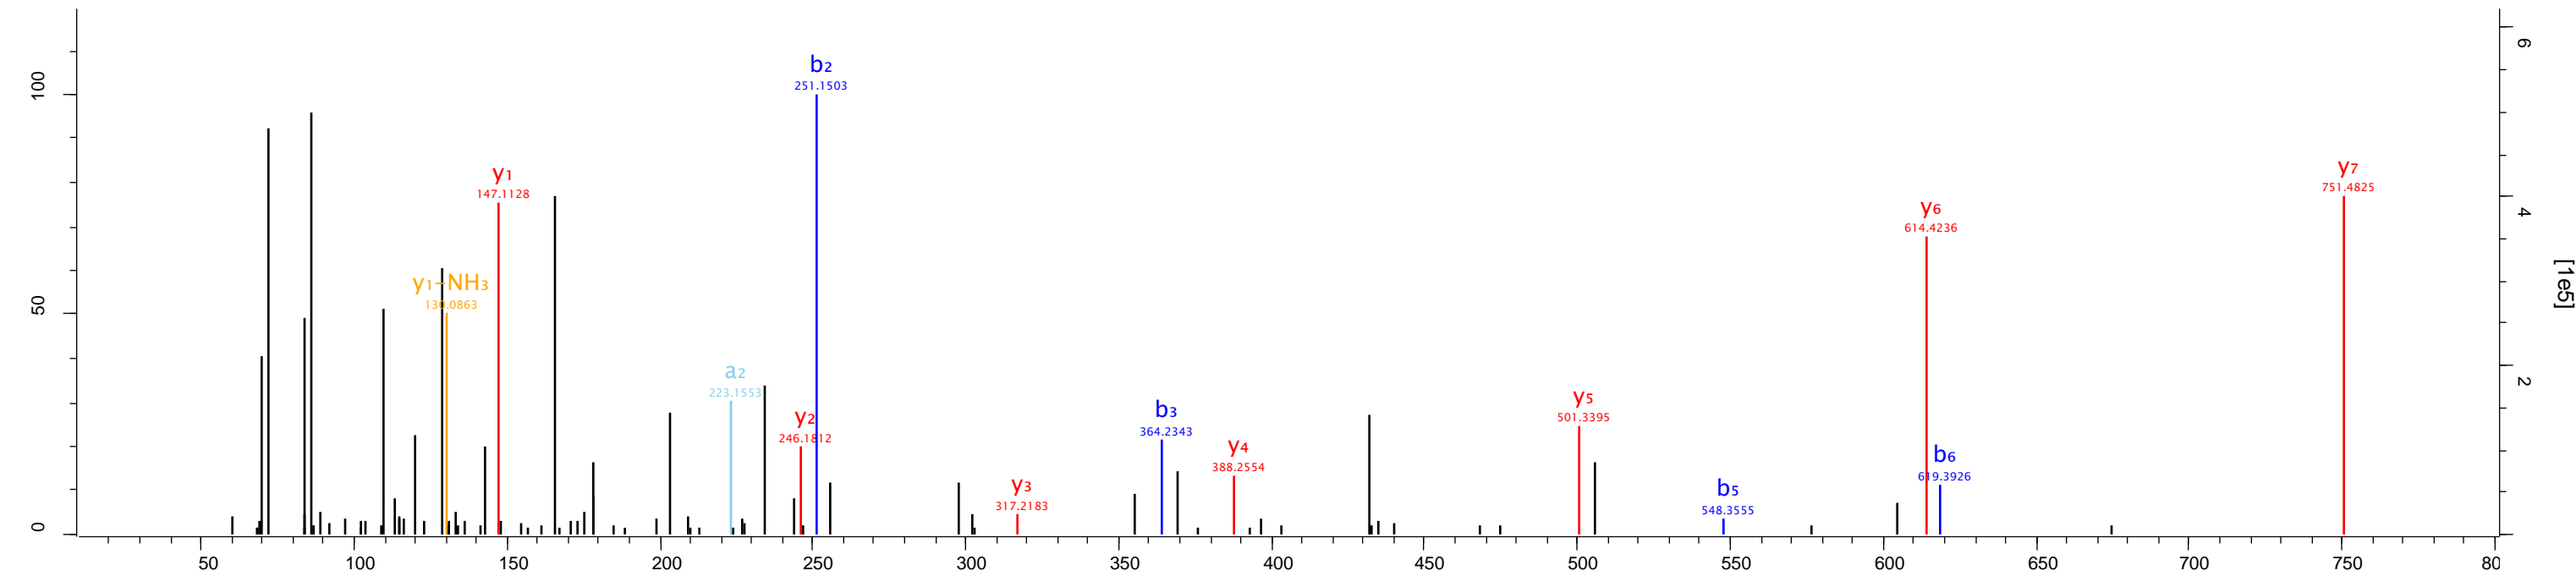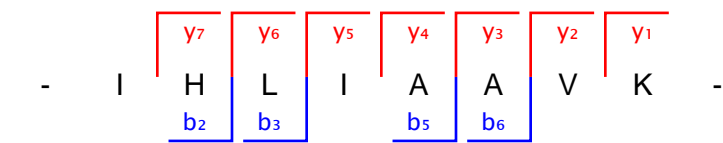

Raw file 20140827\_EXQ00\_FaHo\_SA\_EAF3\_01 Scan 4781 Method FTMS; HCD Score 91.66 m/z 581.64 Gene names RPS14B;RPS14A

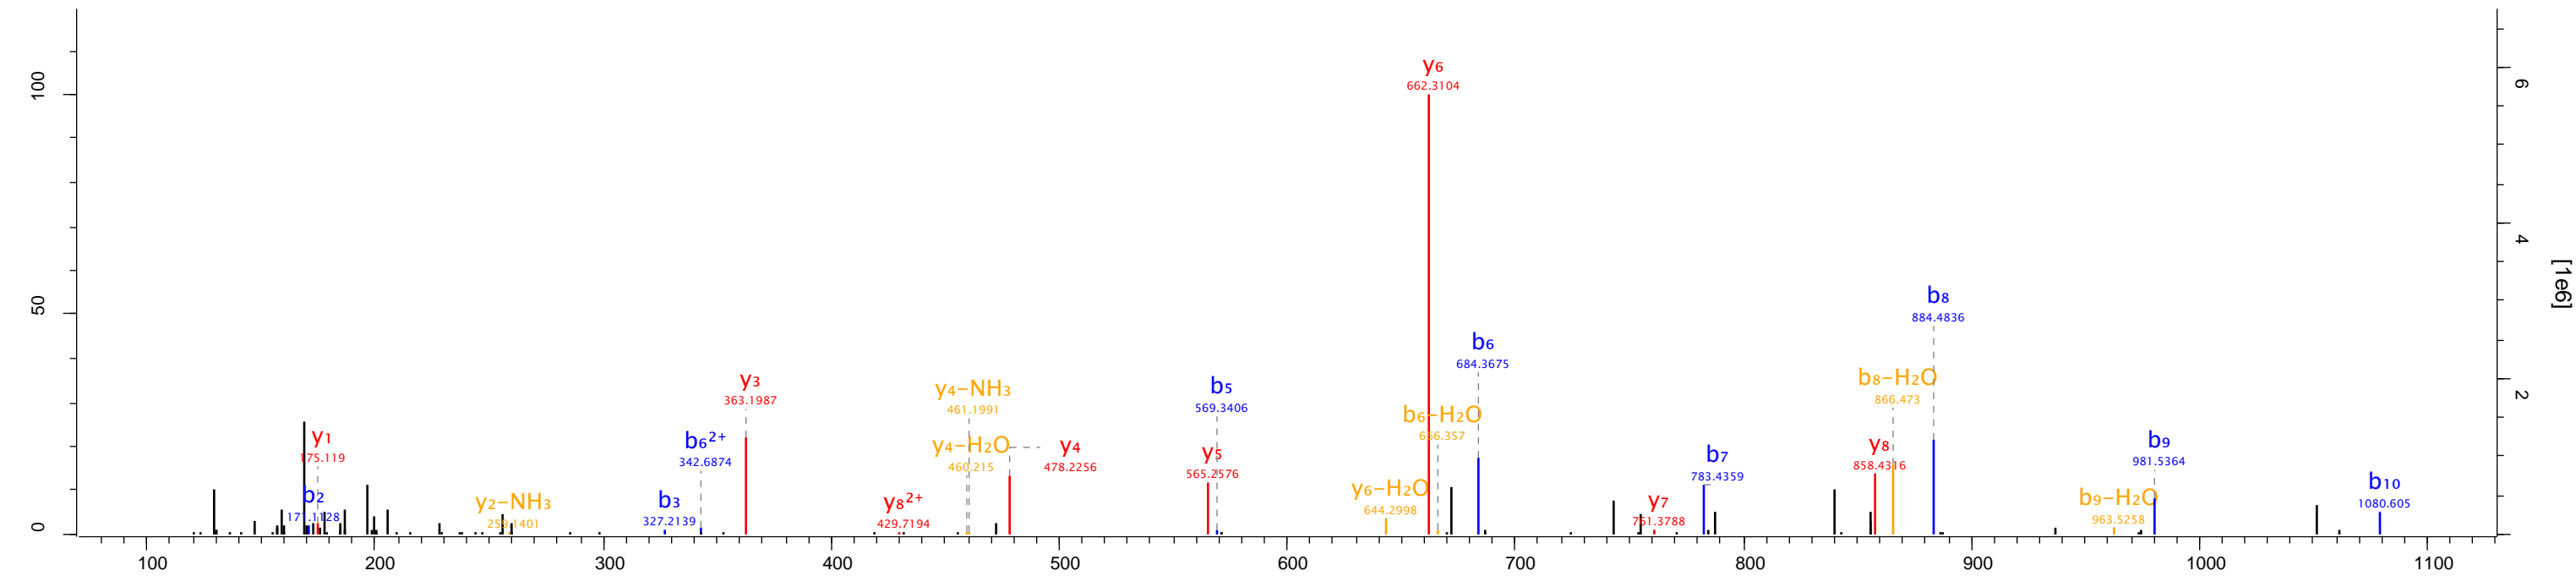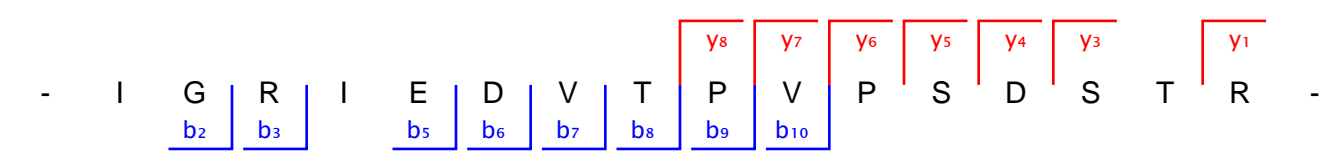

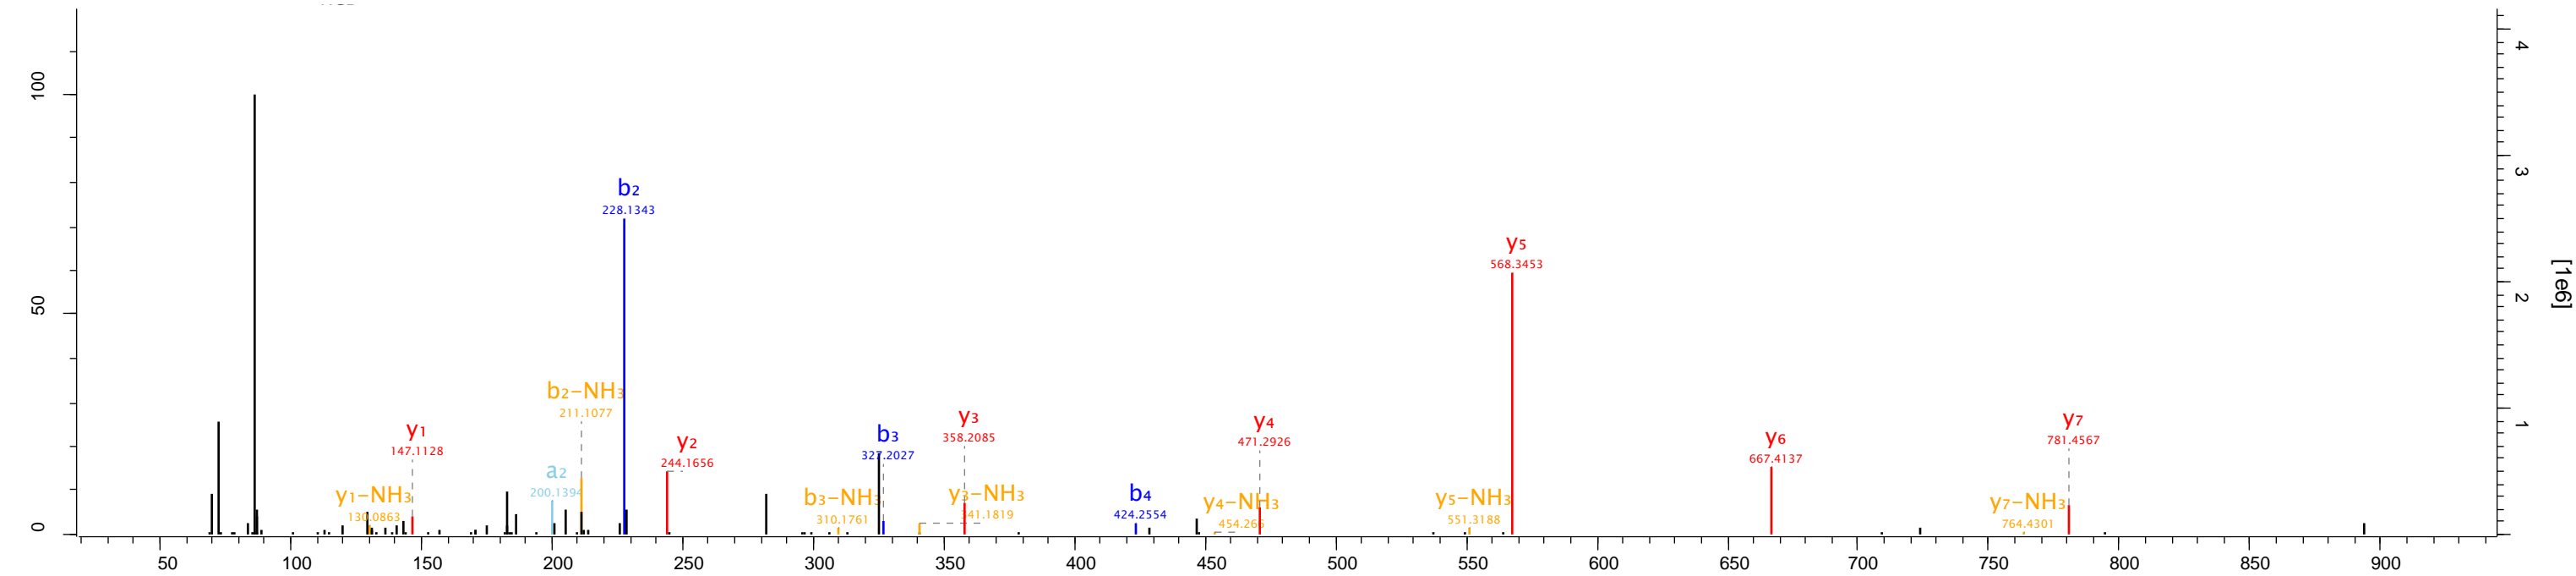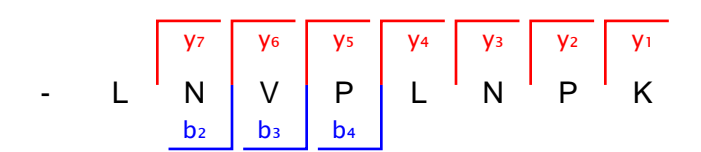

Raw file 20140827\_EXQ00\_FaHo\_SA\_EAF3\_01 Scan 6070 Method FTMS; HCD Score 77.22 m/z 649.97 Gene names ATO3

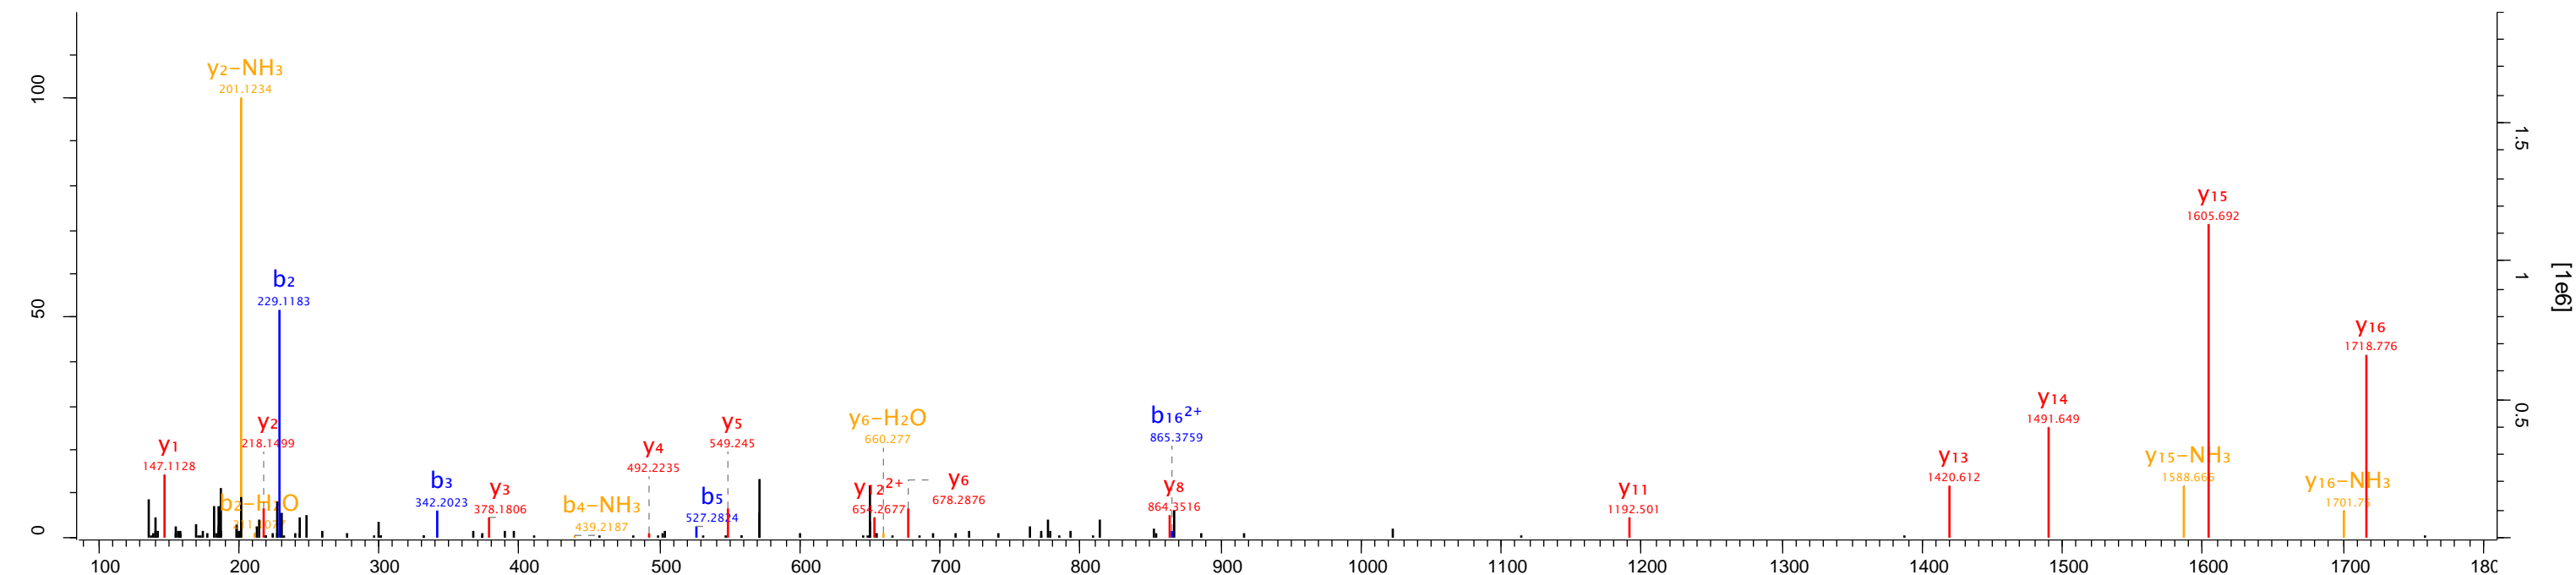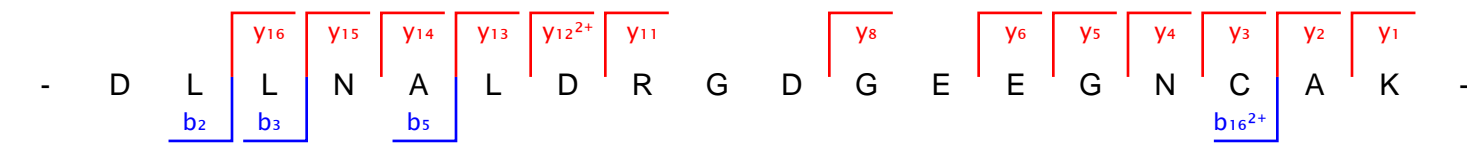

Raw file  
20140827\_EXQ00\_FaHo\_SA\_EAF3\_01

Scan Method Score m/z Gene names  
6822 FTMS; HCD 121.68 660.37 TY1B-OL;TY1B-LR2;TY1B-PL;TY1B-ER1;TY1B-PR3;TY1B-H;TY1B-MR2;TY1B-ER2;TY1B-OR;TY1B-BR;TY1B-LR1;TY1B-NL1;TY1B-A;TY1B-BL;TY1B-MR1;TY2B-DR3

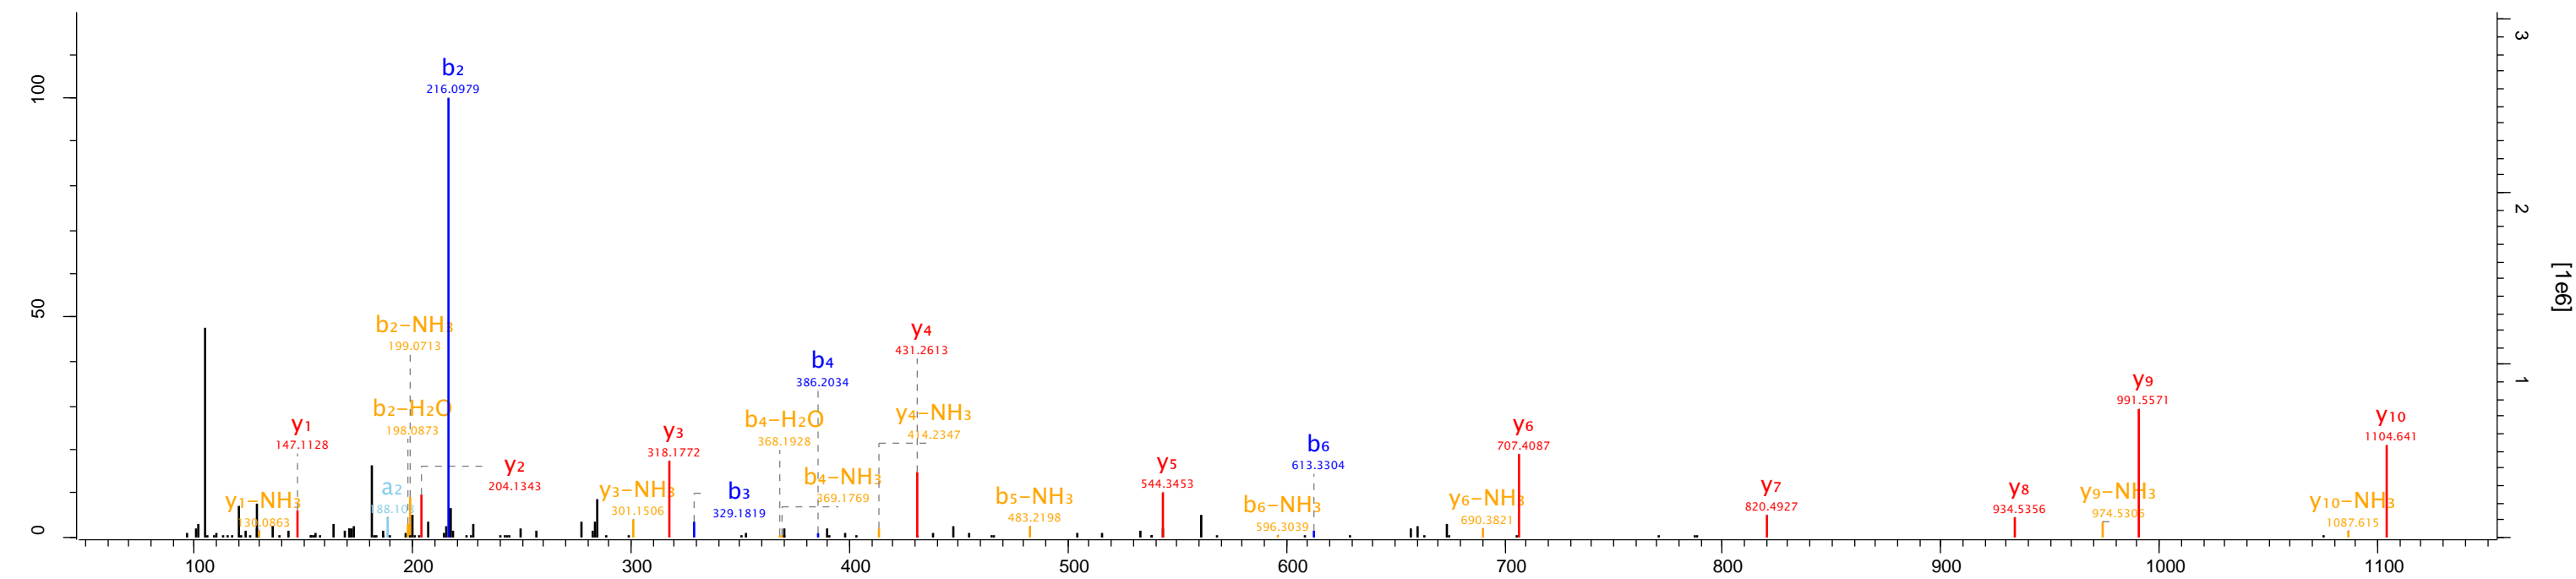

- S Q I G N I Y L L N G K -

b<sub>2</sub> b<sub>3</sub> b<sub>4</sub> b<sub>6</sub> y<sub>1</sub> y<sub>2</sub> y<sub>3</sub> y<sub>4</sub> y<sub>5</sub> y<sub>6</sub> y<sub>7</sub> y<sub>8</sub> y<sub>9</sub> y<sub>10</sub>

Raw file 20140827\_EXQ00\_FaHo\_SA\_EAF3\_01 Scan 8011 Method FTMS; HCD Score 79.84 m/z 996.51 Gene names RPL7A;RPL7B

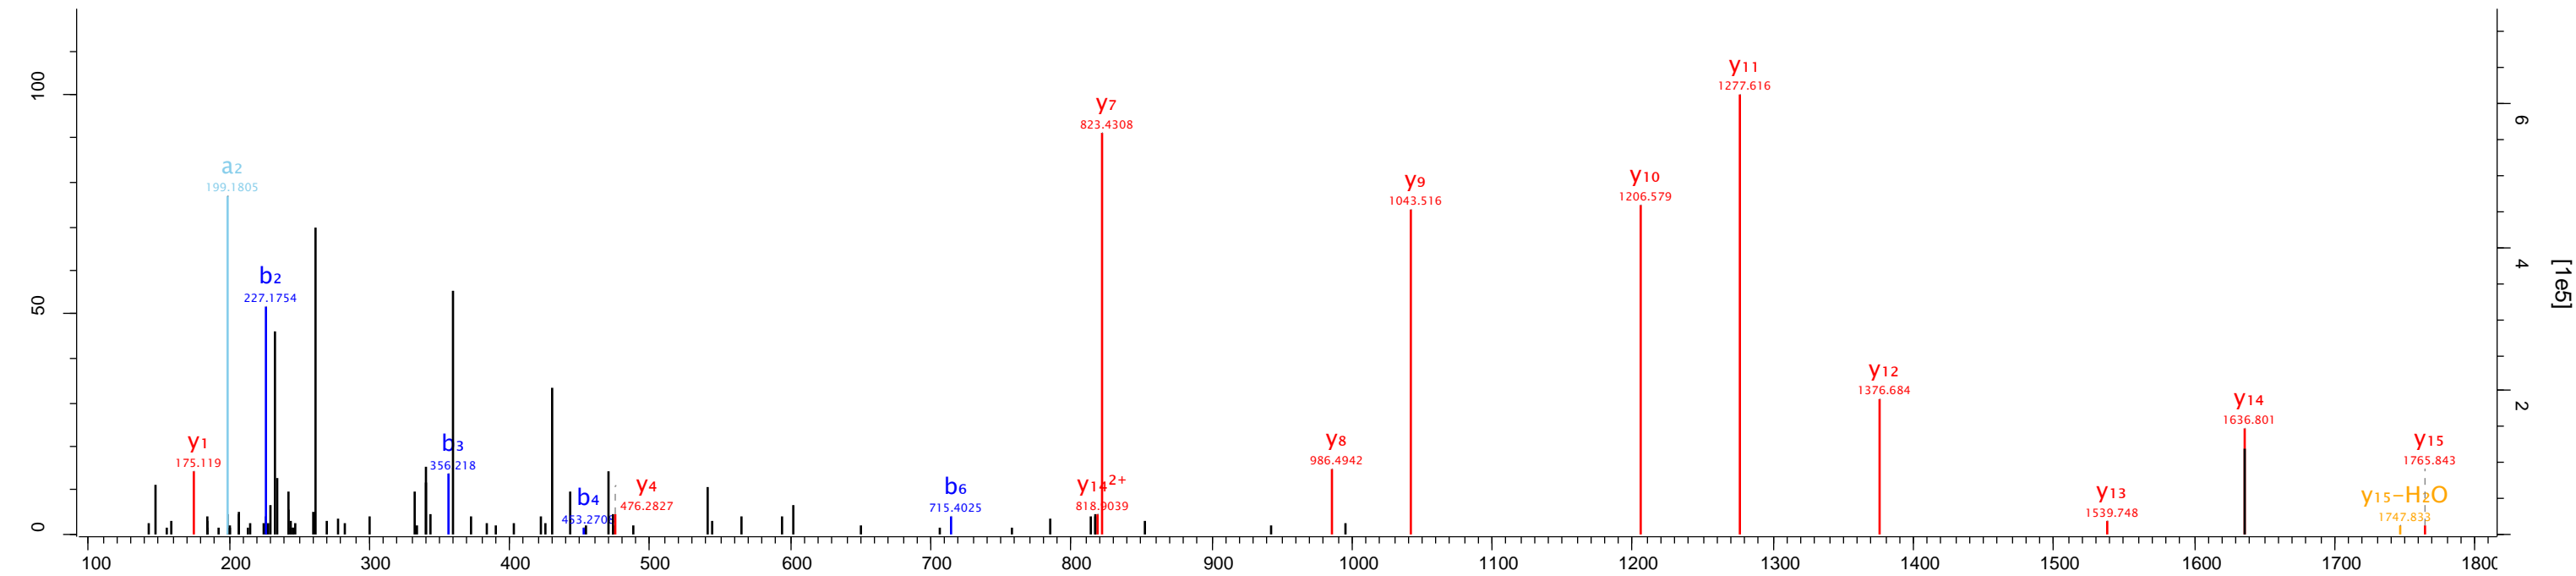

- L I E P Y V A Y G Y P S Y S T I R -

Fragmentation mapping:

- Red boxes above the sequence indicate y-ions: y15 (E), y14 (P), y13 (Y), y12 (V), y11 (A), y10 (Y), y9 (G), y8 (Y), y7 (P), y4 (S), y1 (R).
- Blue boxes below the sequence indicate b-ions: b2 (I), b3 (E), b4 (P), b6 (V).



Raw file

20140827\_EXQ00\_FaHo\_SA\_EAF3\_02

| Scan | Method    | Score  | m/z    | Gene names                                                          |
|------|-----------|--------|--------|---------------------------------------------------------------------|
| 5308 | FTMS; HCD | 164.27 | 888.07 | TY1B-H;TY1B-MR2;TY1B-ER2;TY1B-OR;TY1B-BR;TY1B-DR1;TY1B-LR1;TY1B-DR3 |

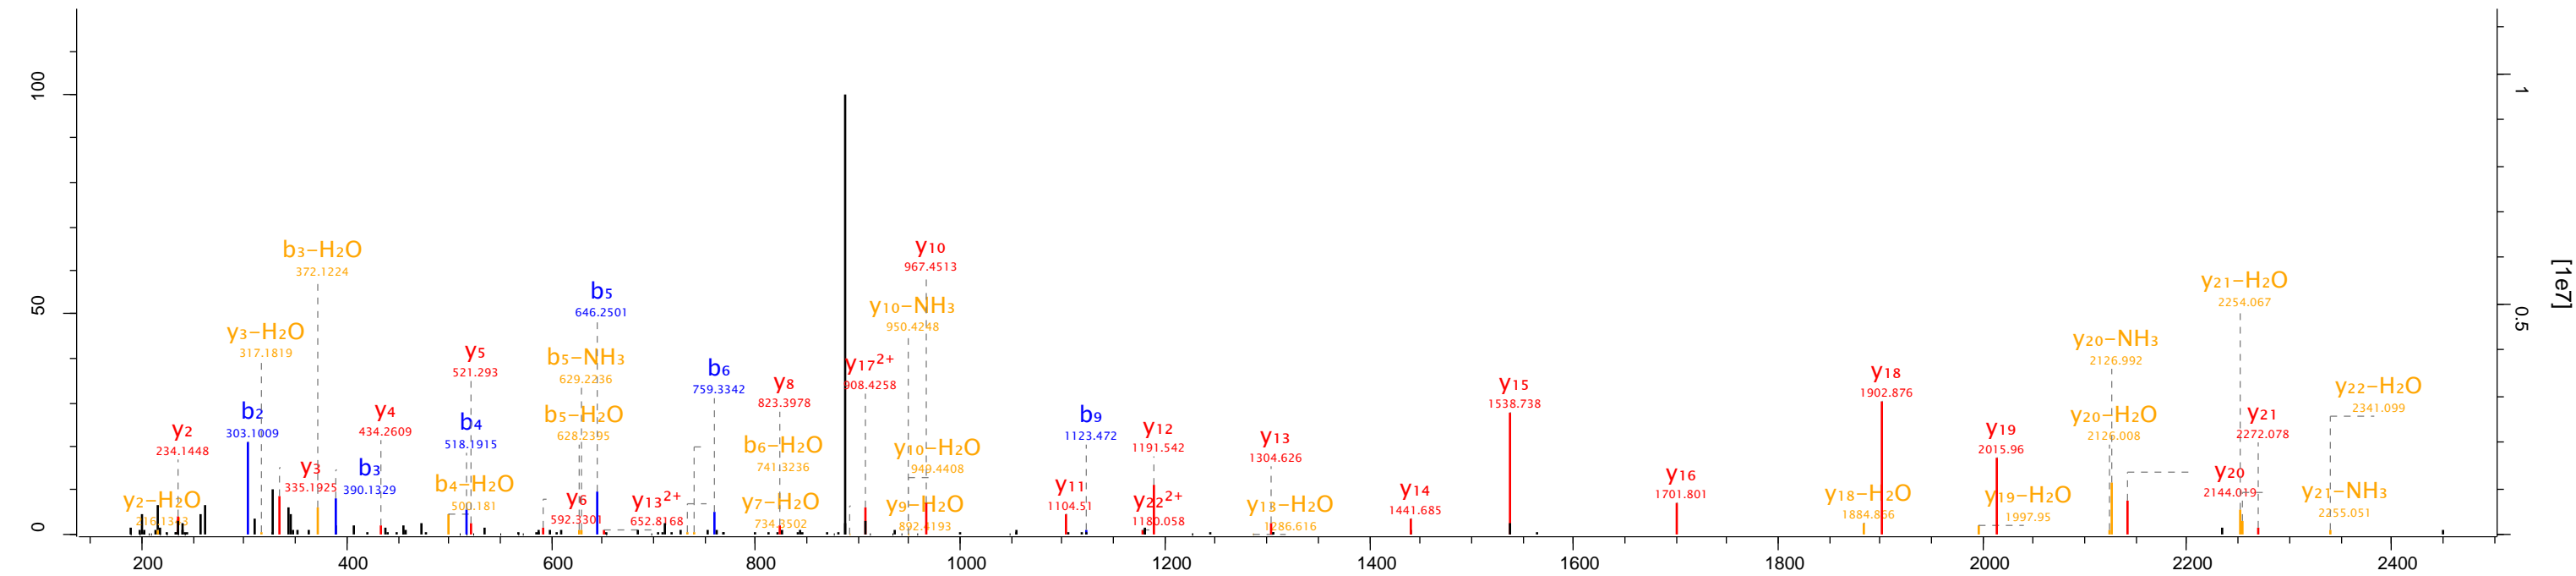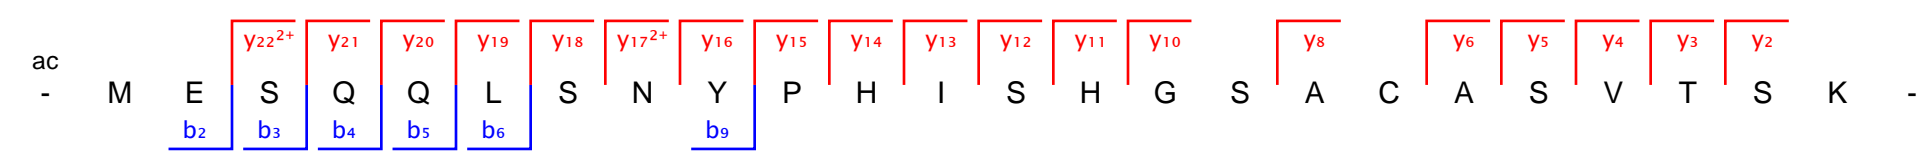

20140827\_EXQ00\_FaHo\_SA\_EAF3\_02 7798 FTMS; HCD 72.99 815.09 TY1B-LR3;TY1B-OL;TY1B-LR4;TY1B-LR2;TY1B-PL;TY1B-ER1;TY1B-PR3;TY1B-H;TY1B-GR2;TY1B-MR2;TY1B-ER2;TY1B-OR;TY1B-BR;TY1B-DR1;TY1B-NL2;TY1B-LR1;TY1B-DR3;TY1B-NL1;TY1B-BL;TY1B-MR1

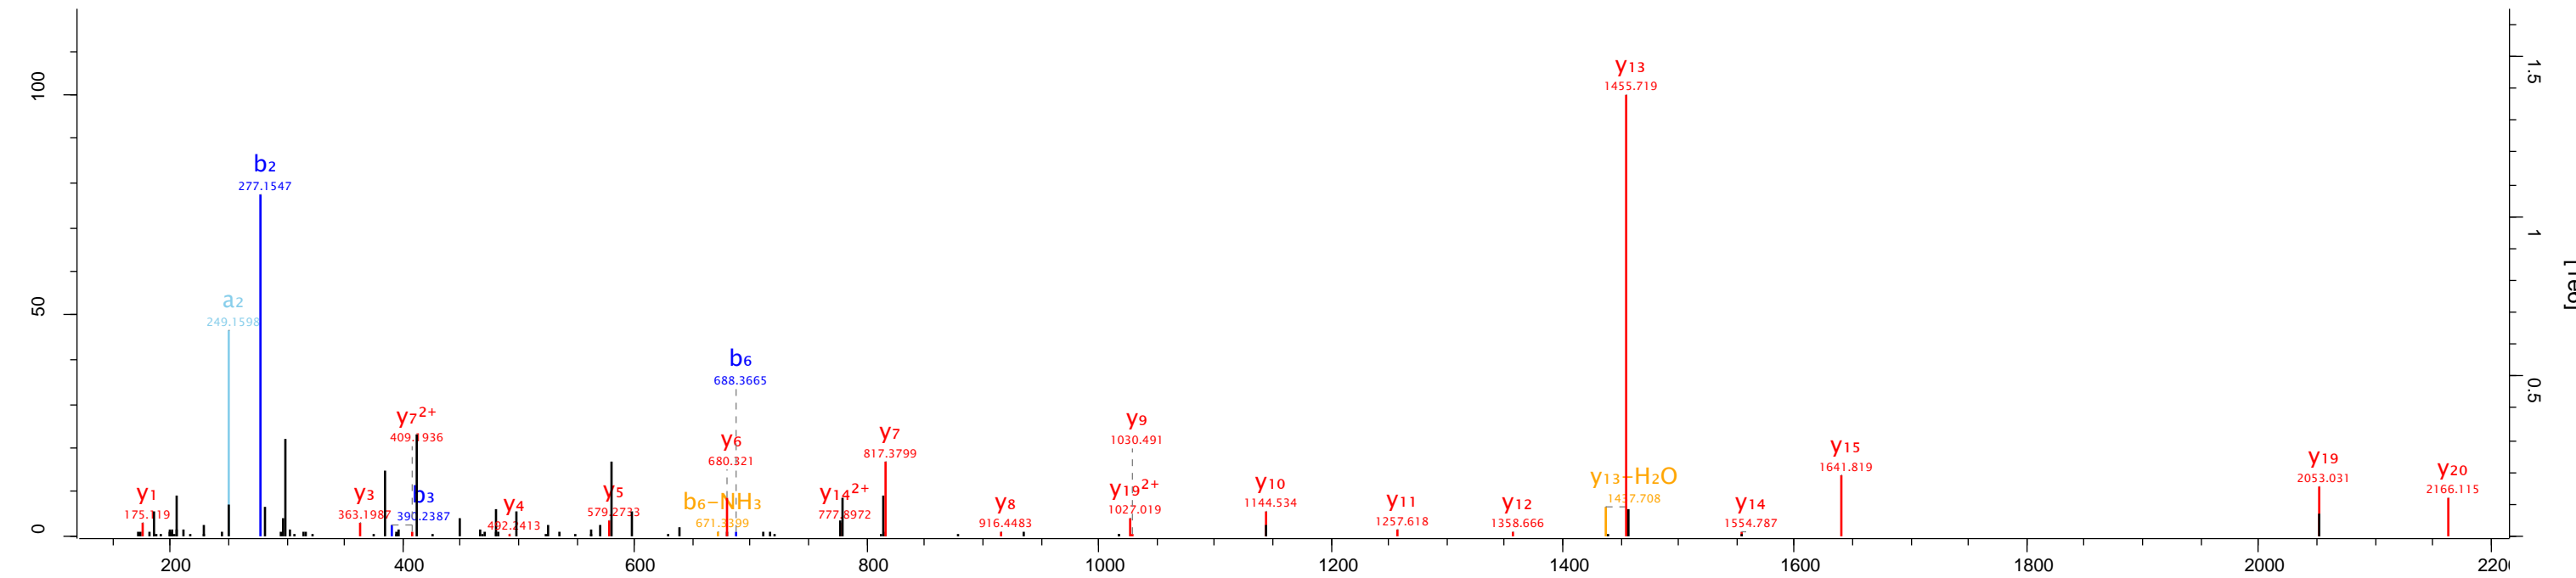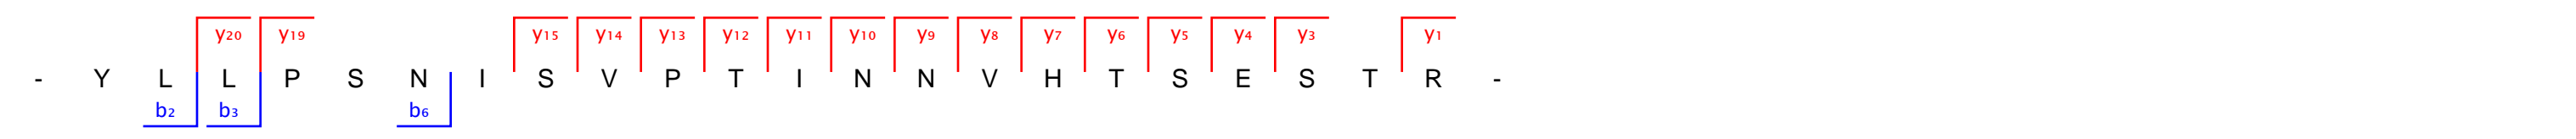

Raw file 20140827\_EXQ00\_FaHo\_SA\_EAF3\_03 Scan Method 2752 FTMS; HCD Score 65.3 m/z 504.24 Gene names TY1B-OL;TY1B-LR4;TY1B-LR2;TY1B-PL;TY1B-ER1;TY1B-H;TY1B-GR2;TY1B-MR2;TY1B-ER2;TY1B-OR;TY1B-BR;TY1B-DR1;TY1B-NL2;TY1B-LR1;TY1B-DR3;TY1B-NL1;TY1B-A;TY1B-BL;TY1B-MR1

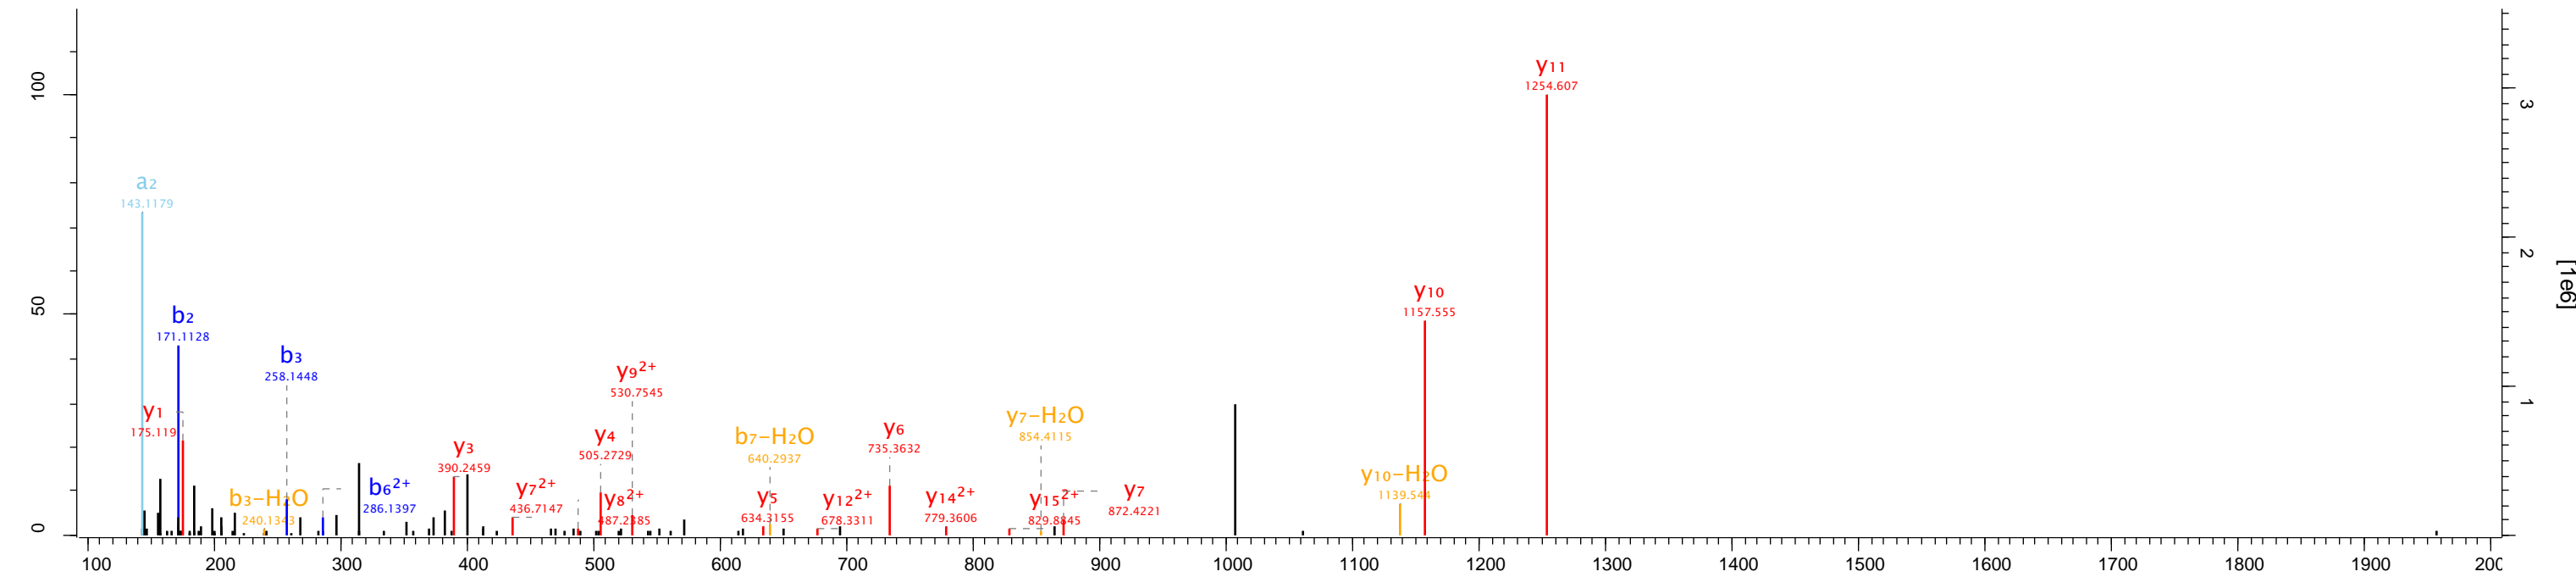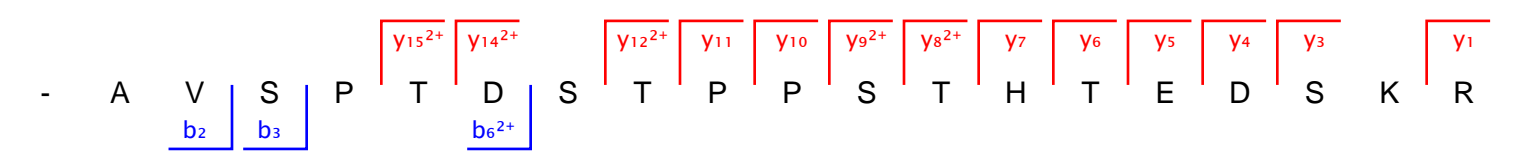

Raw file 20140827\_EXQ00\_FaHo\_SA\_EAF3\_03 Scan 3538 Method FTMS; HCD Score 163.84 m/z 414.75 Gene names RPL9A;RPL9B

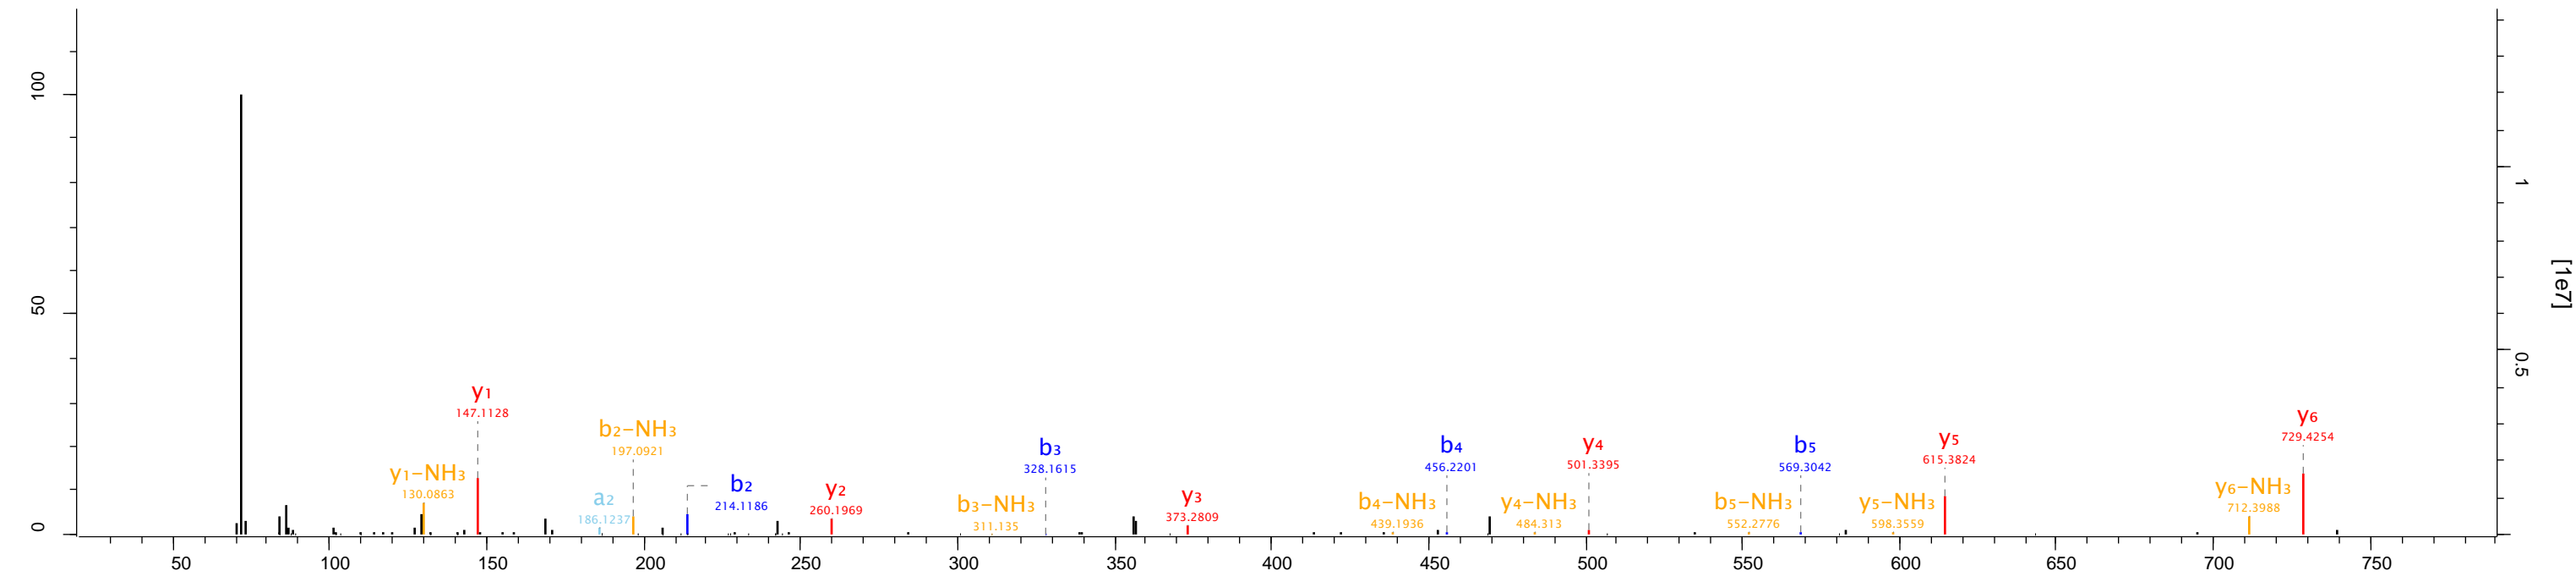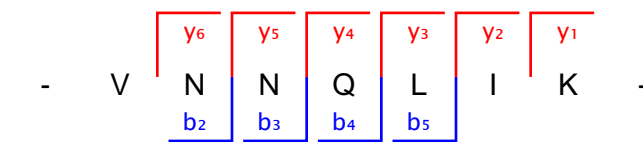

Raw file: 20140827\_EXQ00\_FaHo\_SA\_EAF3\_03  
 Scan: 3721  
 Method: FTMS; HCD  
 Score: 72.2  
 m/z: 589.28  
 Gene names: TY1B-LR3;TY1B-OL;TY1B-LR4;TY1B-LR2;TY1B-PL;TY1B-ER1;TY1B-PR3;TY1B-H;TY1B-GR2;TY1B-MR2;TY1B-ER2;TY1B-OR;TY1B-BR;TY1B-DR1;TY1B-NL2;TY1B-LR1;TY1B-DR3;TY1B-NL1;TY1B-A;TY1B-BL;TY1B-MR1

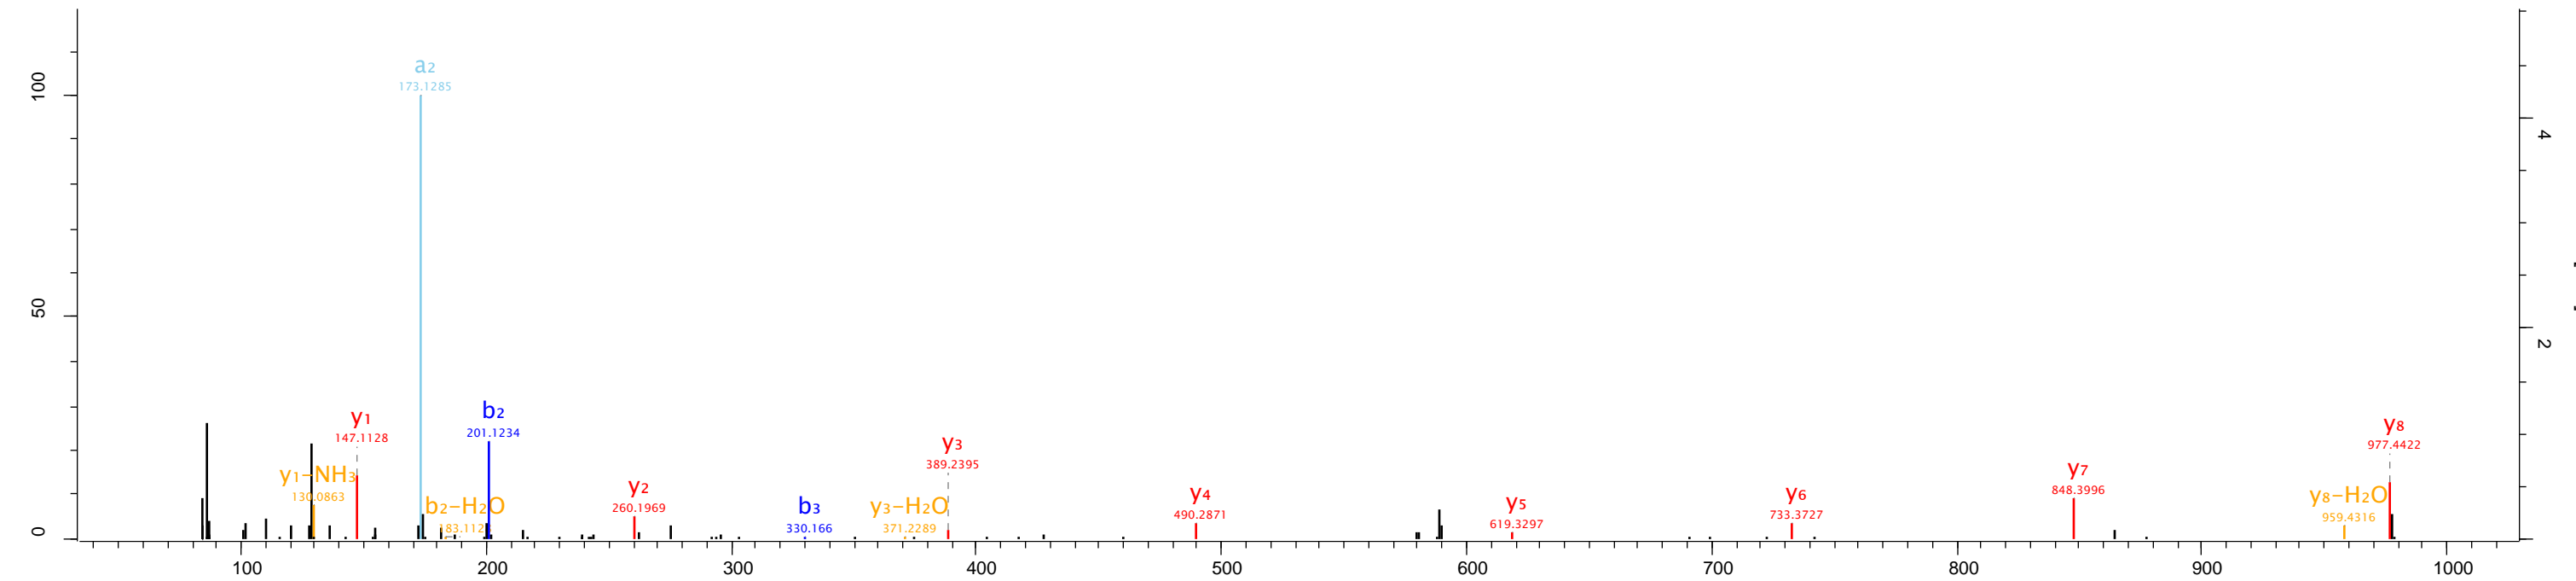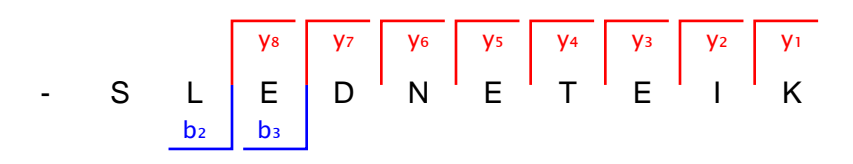

Raw file

Scan Method Score m/z Gene names

20140827\_EXQ00\_FaHo\_SA\_EAF3\_03

4506 FTMS; HCD 97.47 561.28 TY1B-LR3;TY1B-OL;TY1B-LR4;TY1B-LR2;TY1B-PL;TY1B-ER1;TY1B-PR3;TY1B-H;TY1B-GR2;TY1B-MR2;TY1B-ER2;TY1B-OR;TY1B-BR;TY1B-LR1;TY1B-NL1;TY1B-BL;TY1B-MR1

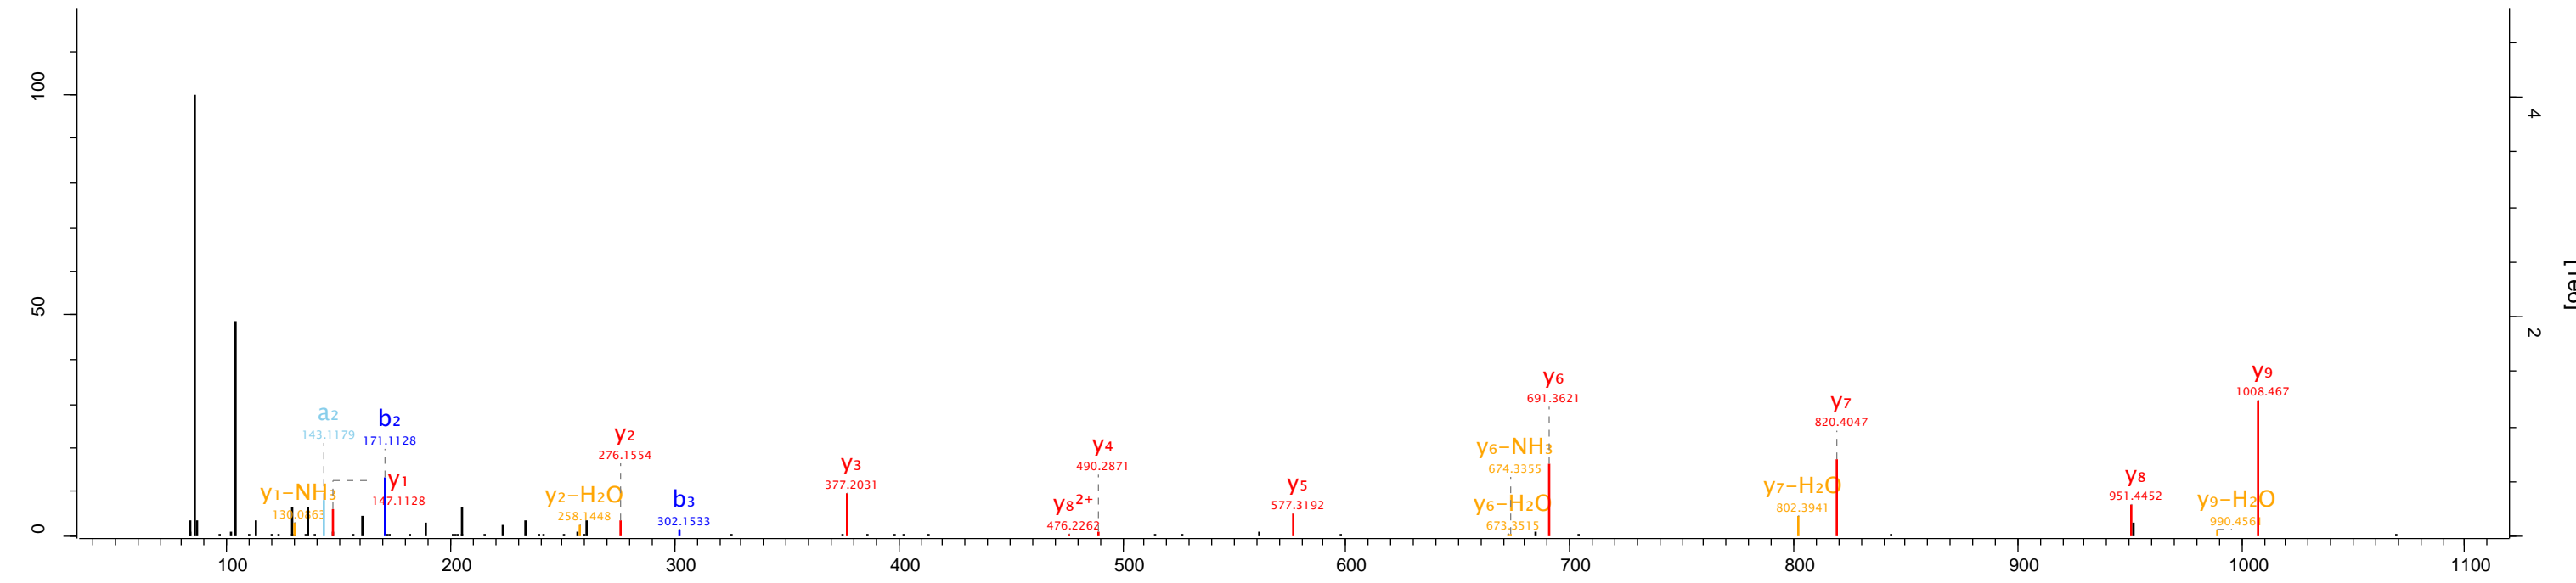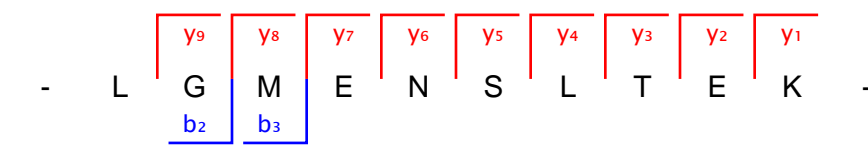

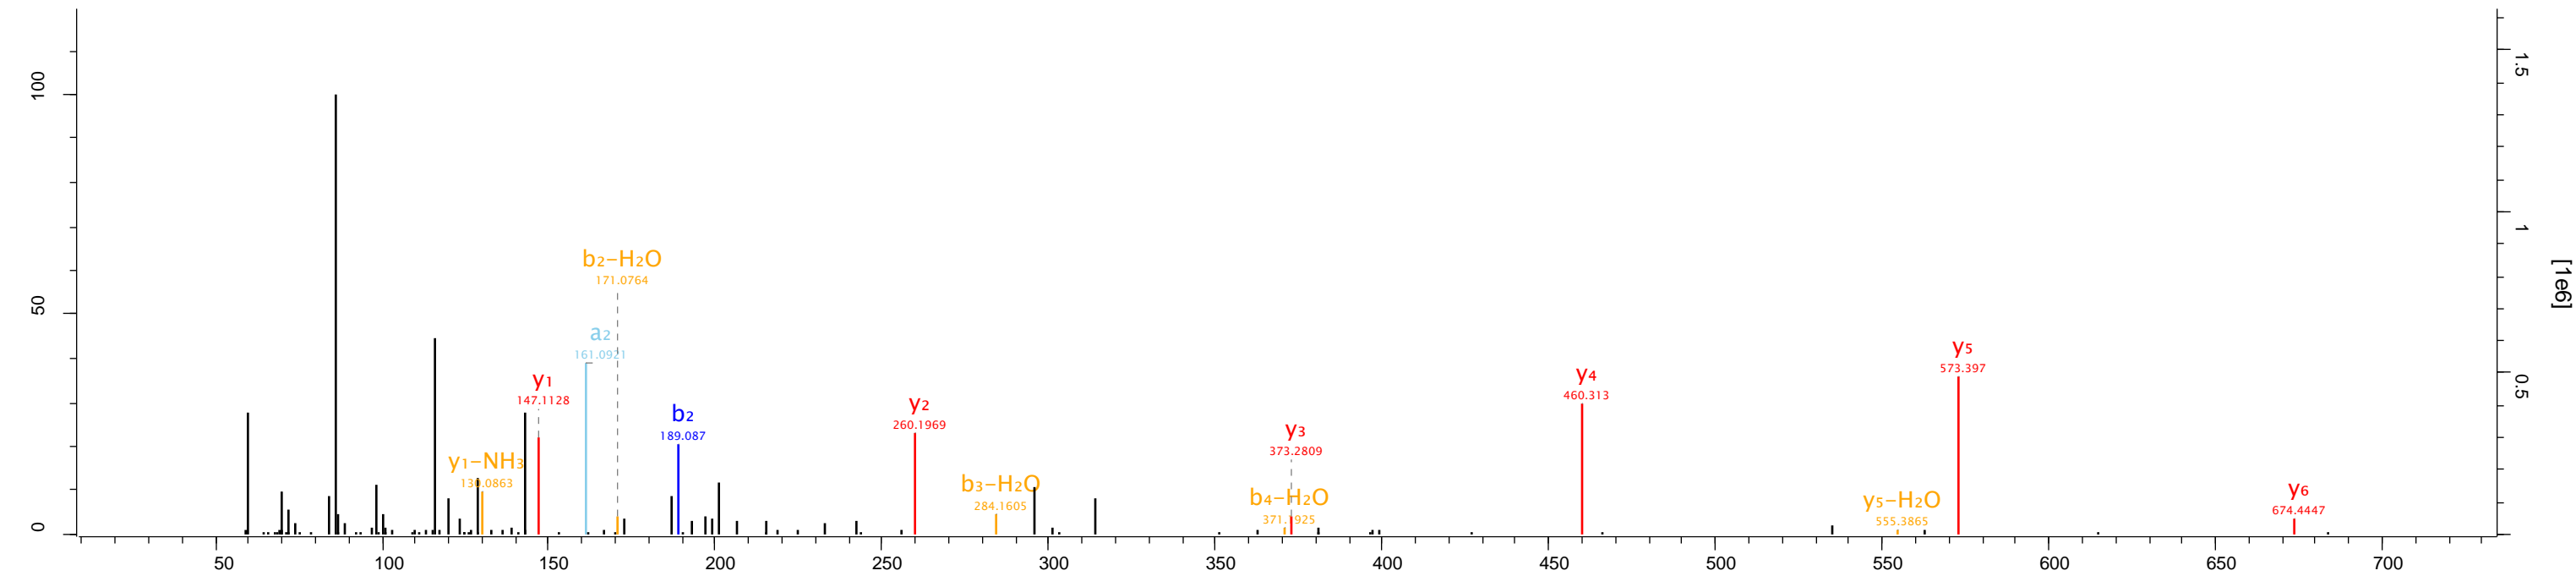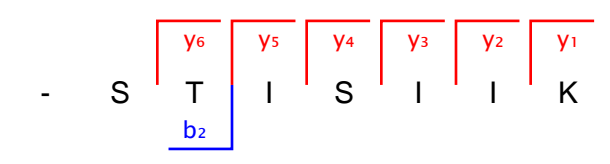

Raw file: 20140827\_EXQ00\_FaHo\_SA\_EAF3\_03  
 Scan: 5477 Method: FTMS; HCD Score: 99.07 m/z: 816.41 Gene names: TY1B-BL;TY1B-MR1;TY1A-DR2;TY1A-MR1

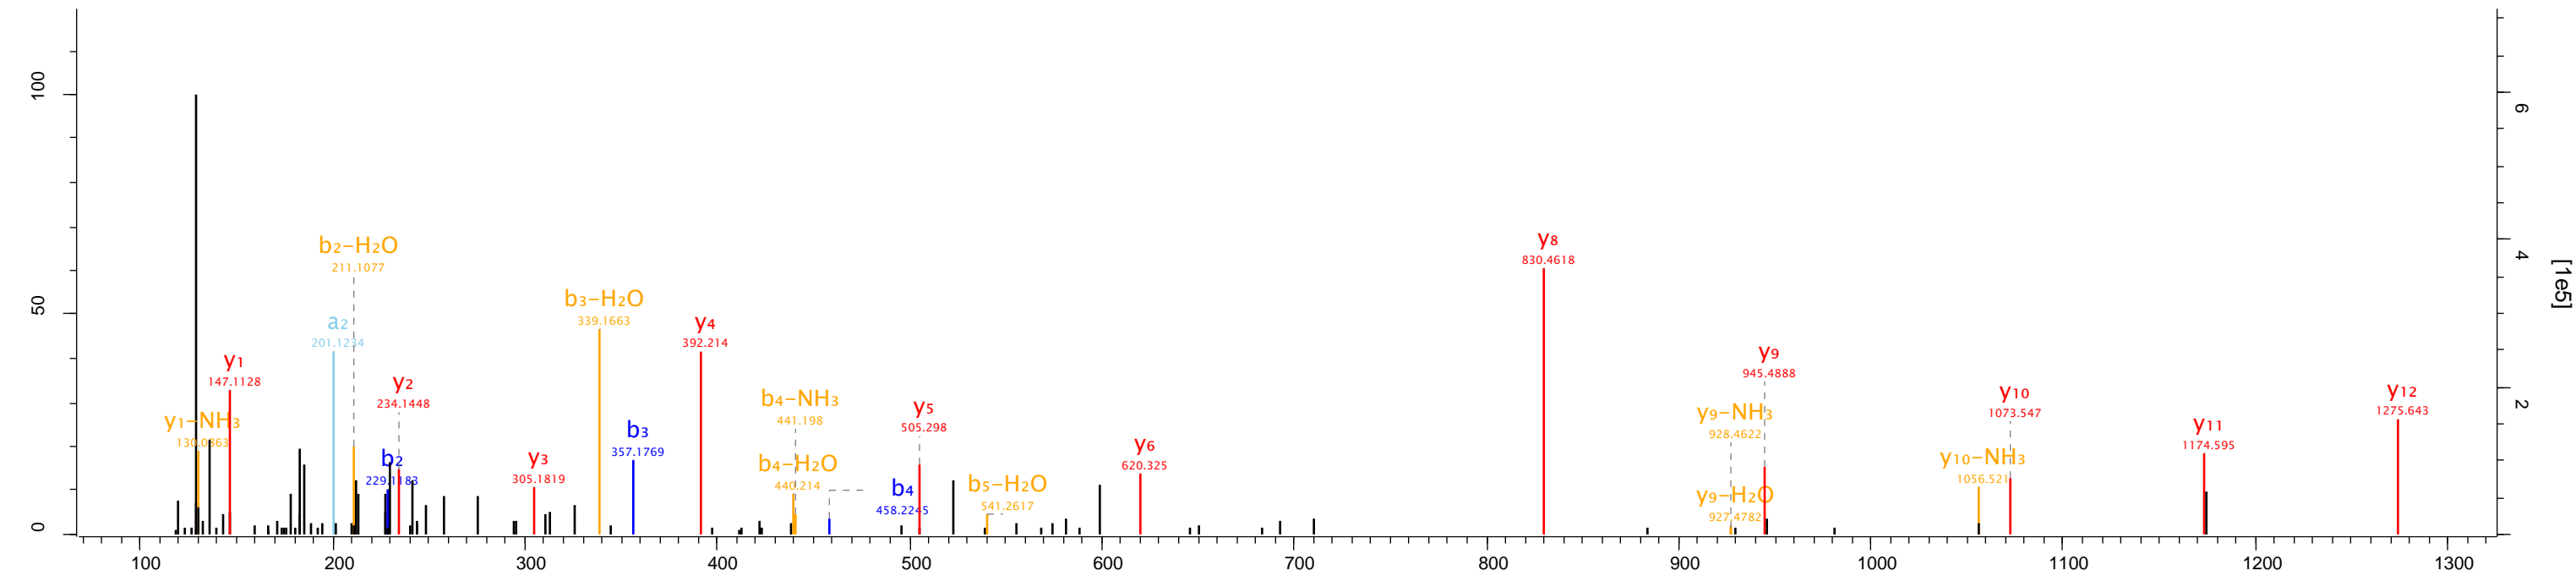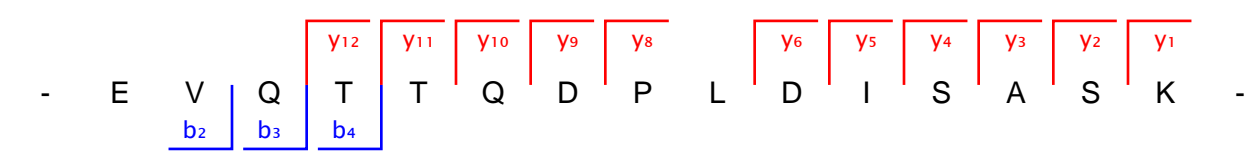



Raw file 20140827\_EXQ00\_FaHo\_SA\_EAF3\_03 Scan 5763 Method FTMS; HCD Score 102.69 m/z 887.08 Gene names TY1B-BL

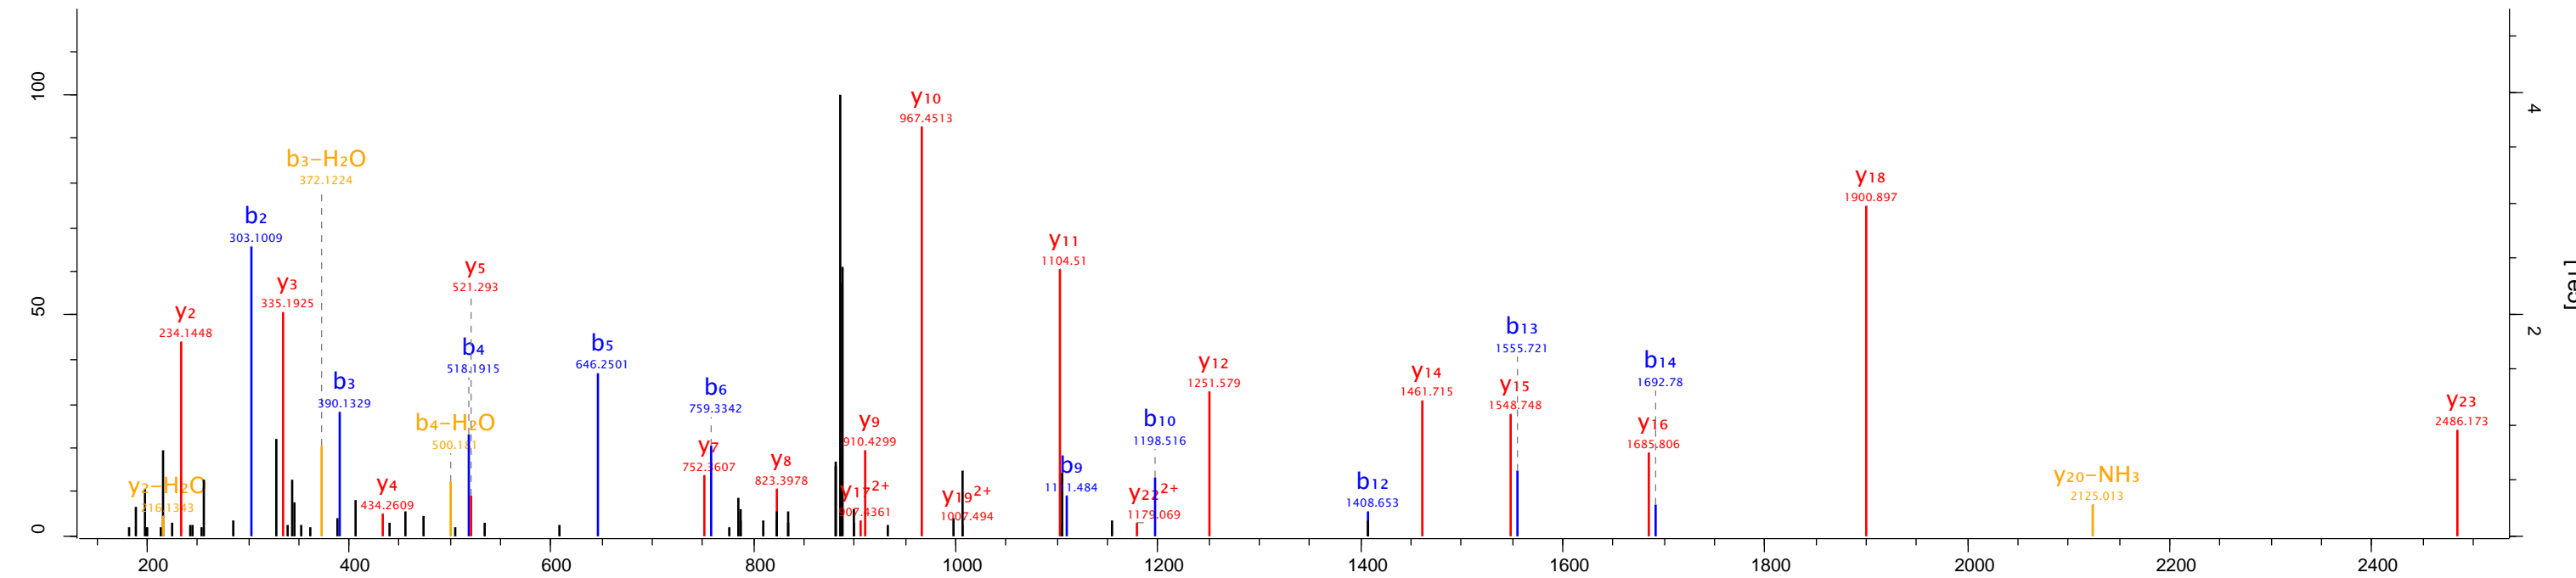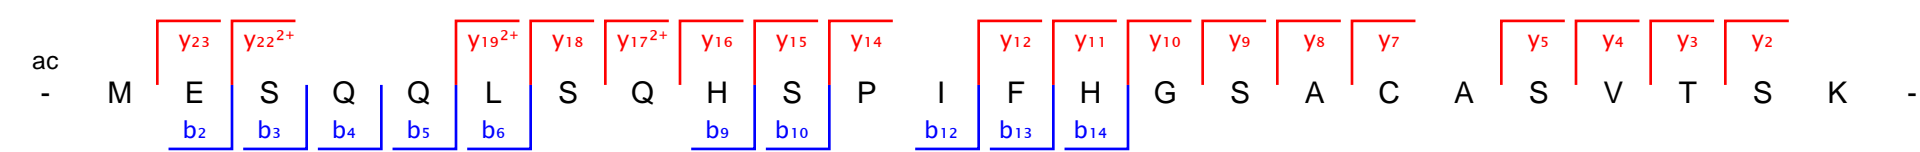

Raw file 20140827\_EXQ00\_FaHo\_SA\_EAF3\_03 Scan 5868 Method FTMS; HCD Score 129.08 m/z 1327.11 Gene names TY1B-OL

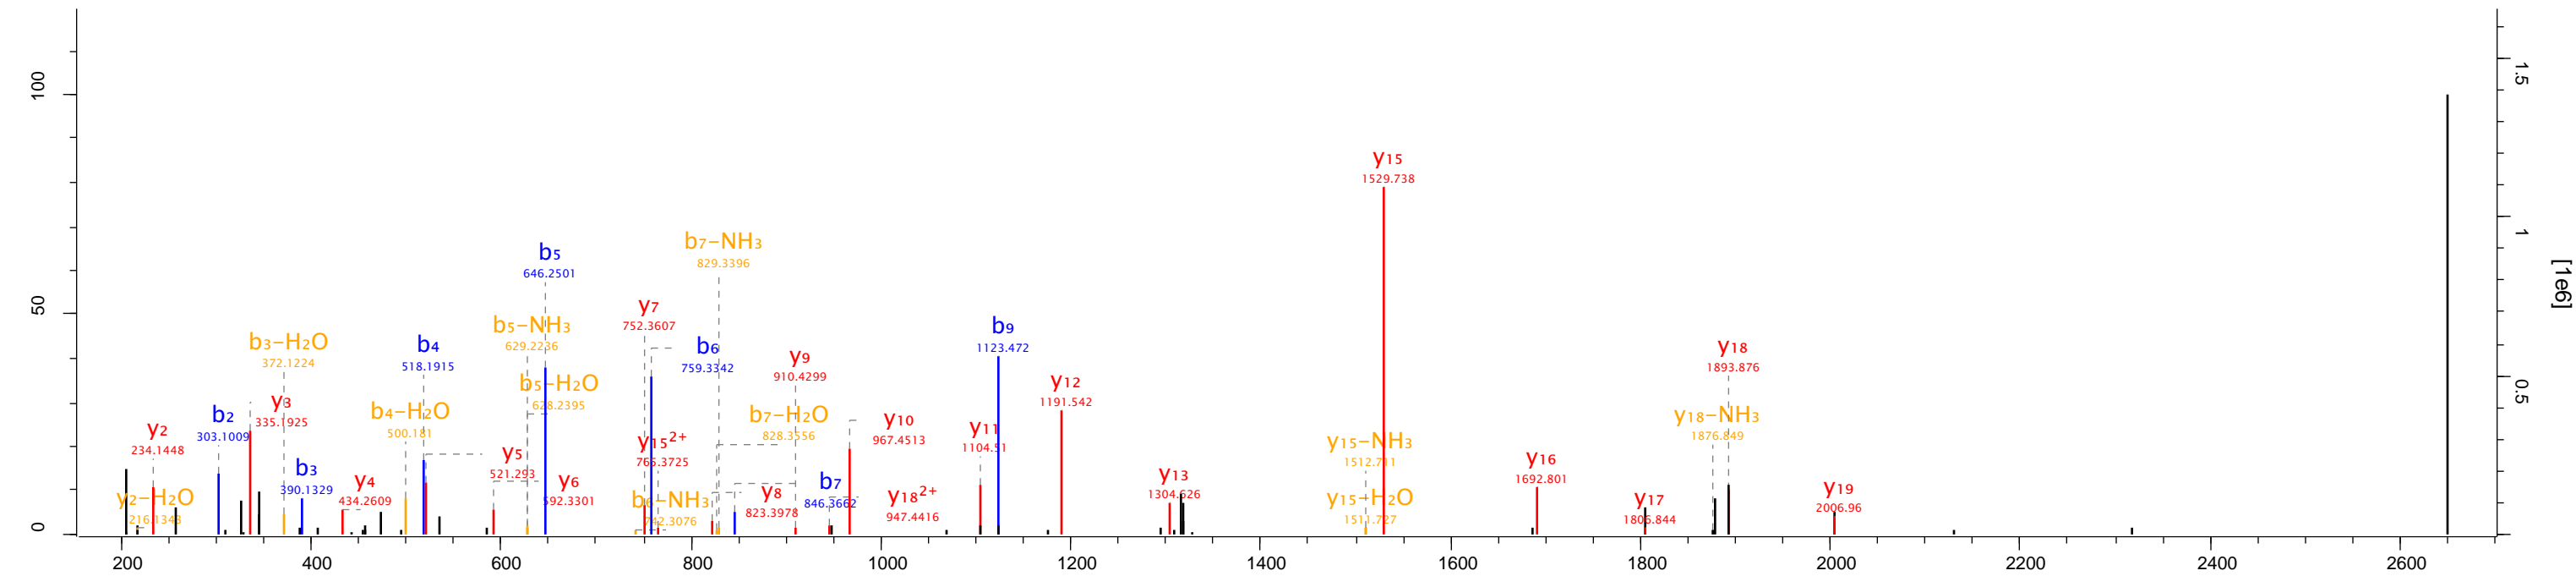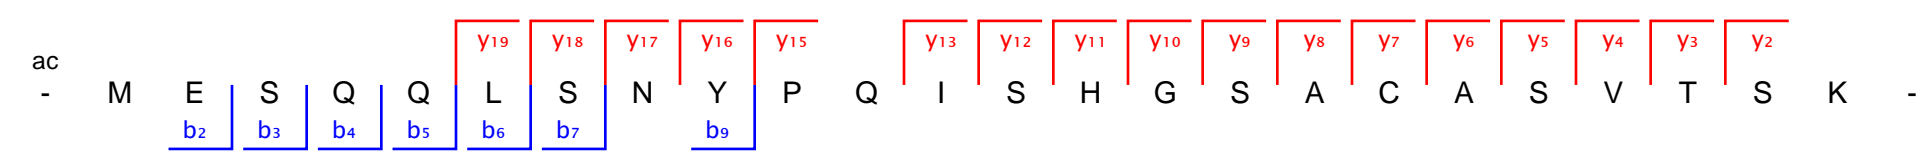

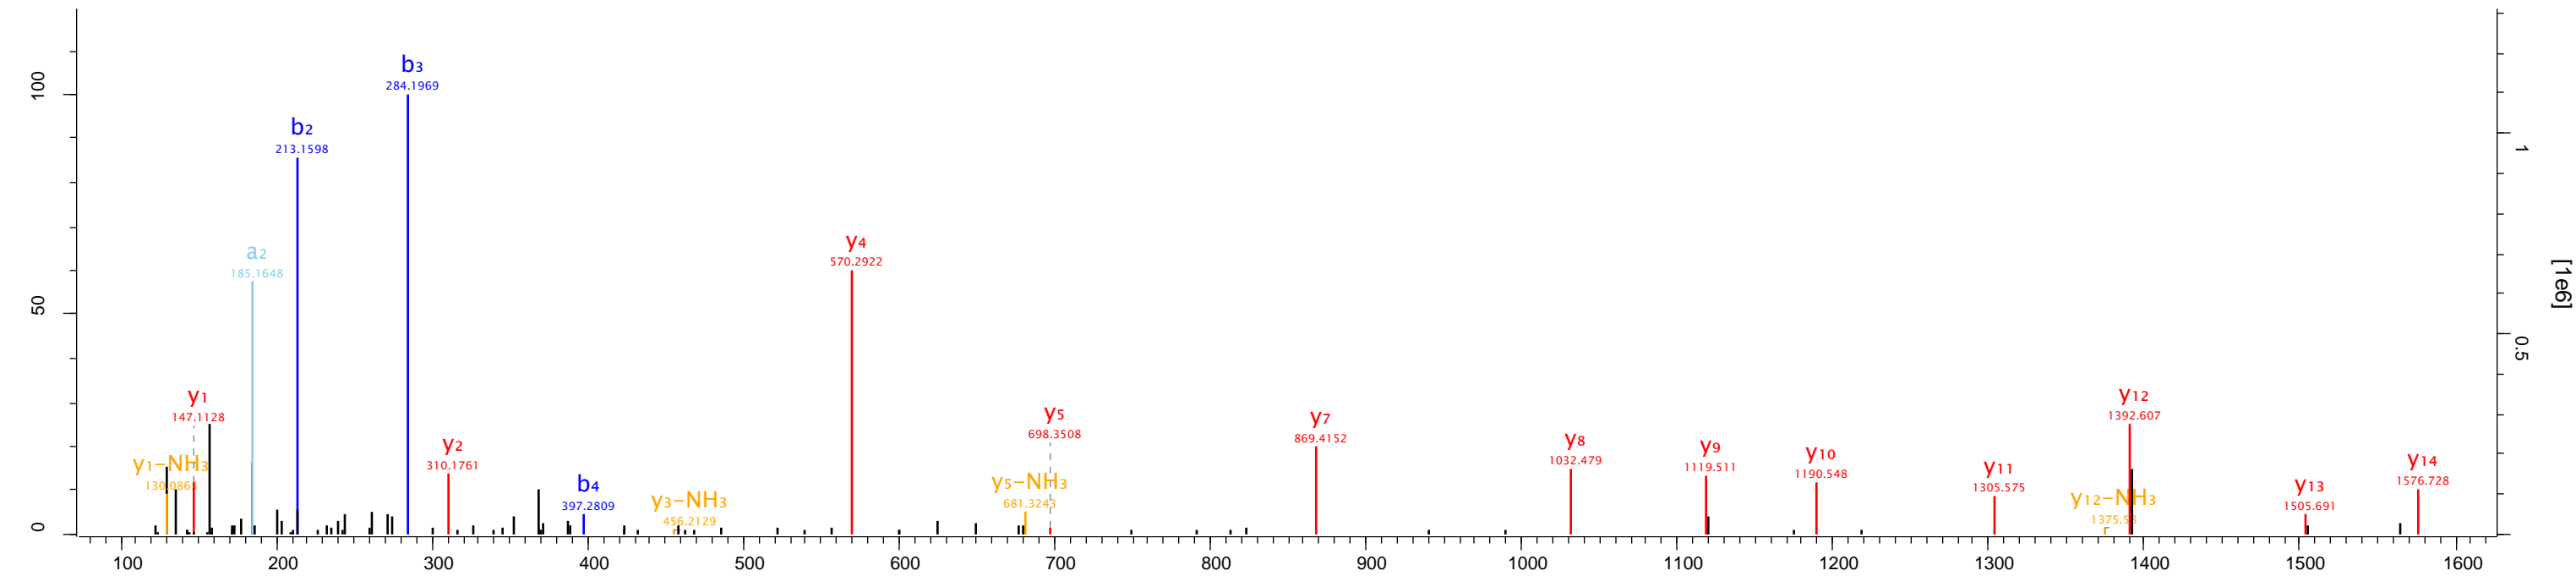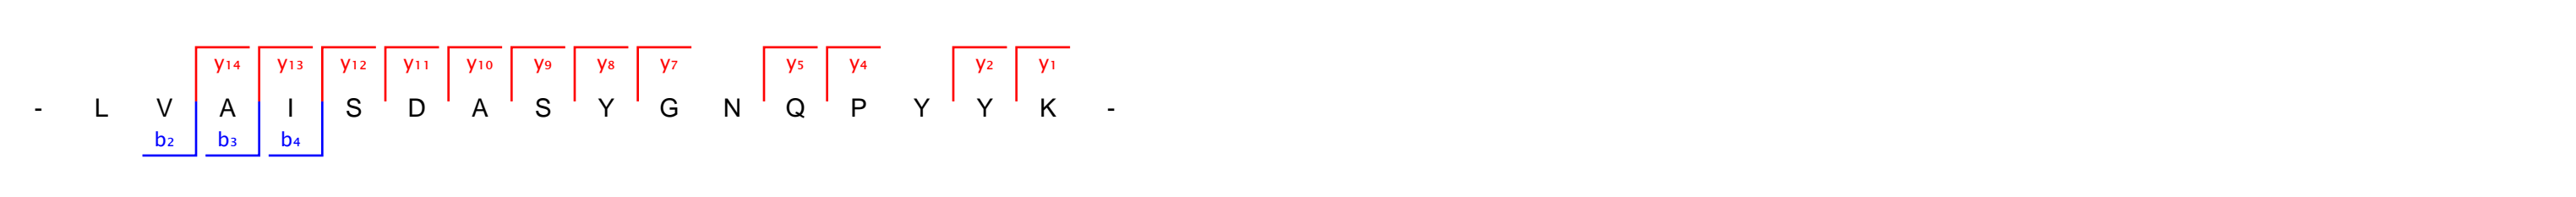

Raw file 20140827\_EXQ00\_FaHo\_SA\_EAF3\_03 Scan 6294 Method FTMS; HCD Score 90.69 m/z 871.4 Gene names TY1B-PR3

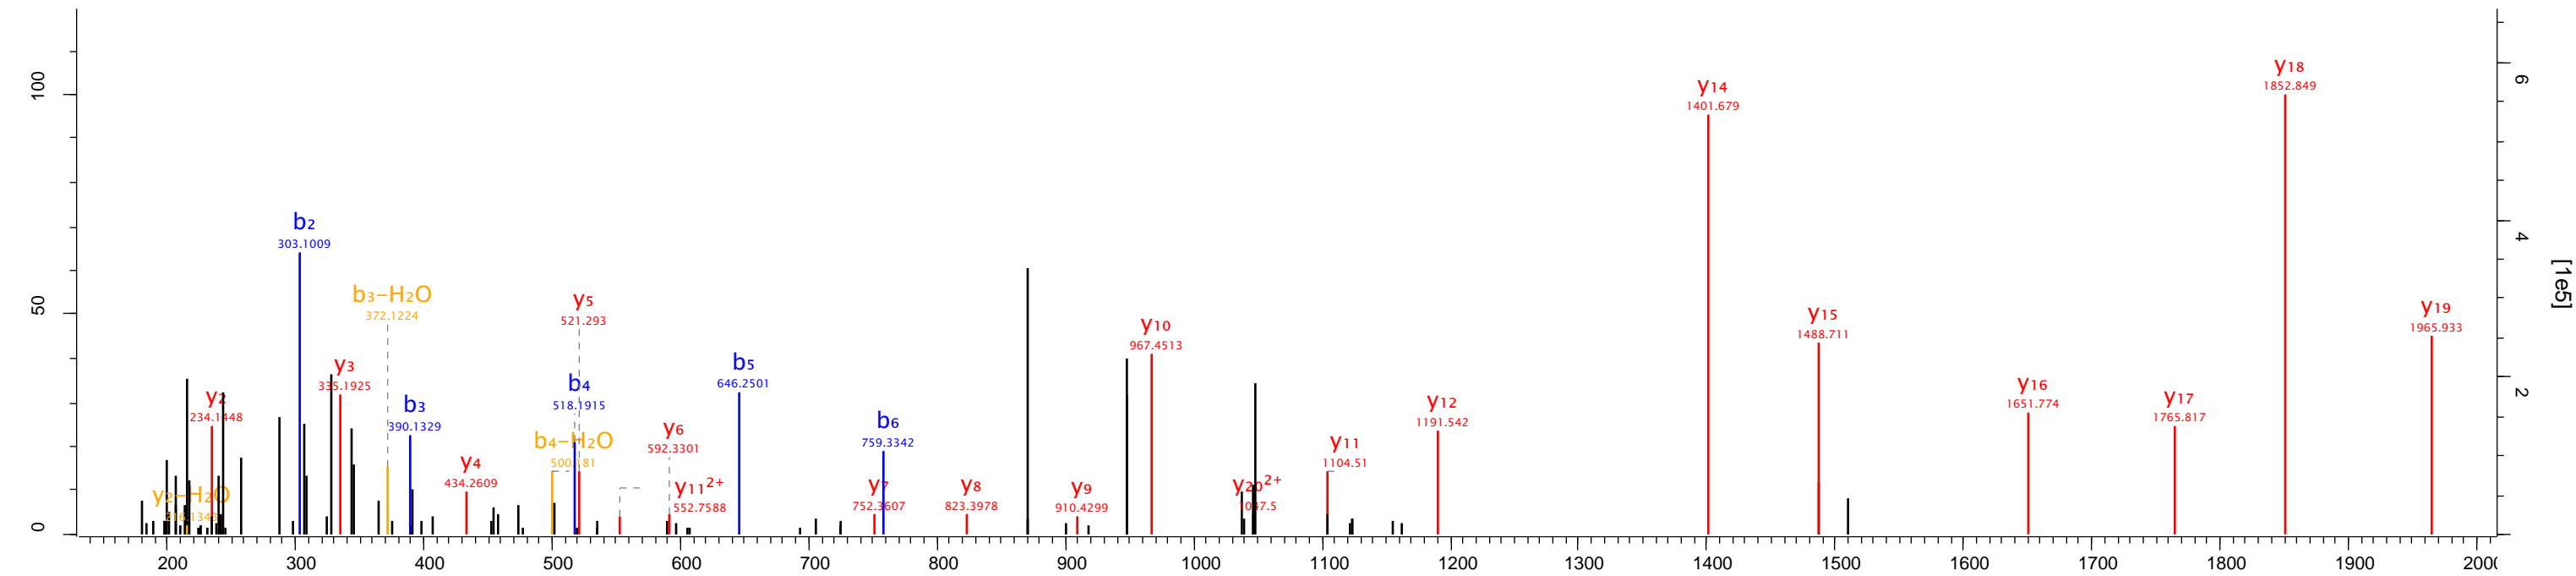

ac - M E S Q Q L S N Y S P I S H G S A C A S V T S K -

Fragmentation mapping: b2 (E), b3 (S), b4 (Q), b5 (Q), b6 (L); y20<sup>2+</sup> (Q), y19 (L), y18 (S), y17 (N), y16 (Y), y15 (S), y14 (P), y12 (S), y11 (H), y10 (G), y9 (S), y8 (A), y7 (C), y6 (A), y5 (S), y4 (V), y3 (T), y2 (S).

Raw file 20140827\_EXQ00\_FaHo\_SA\_EAF3\_03 Scan 7268 Method FTMS; HCD Score 88.6 m/z 596.31 Gene names PDR5;PDR15;PDR10

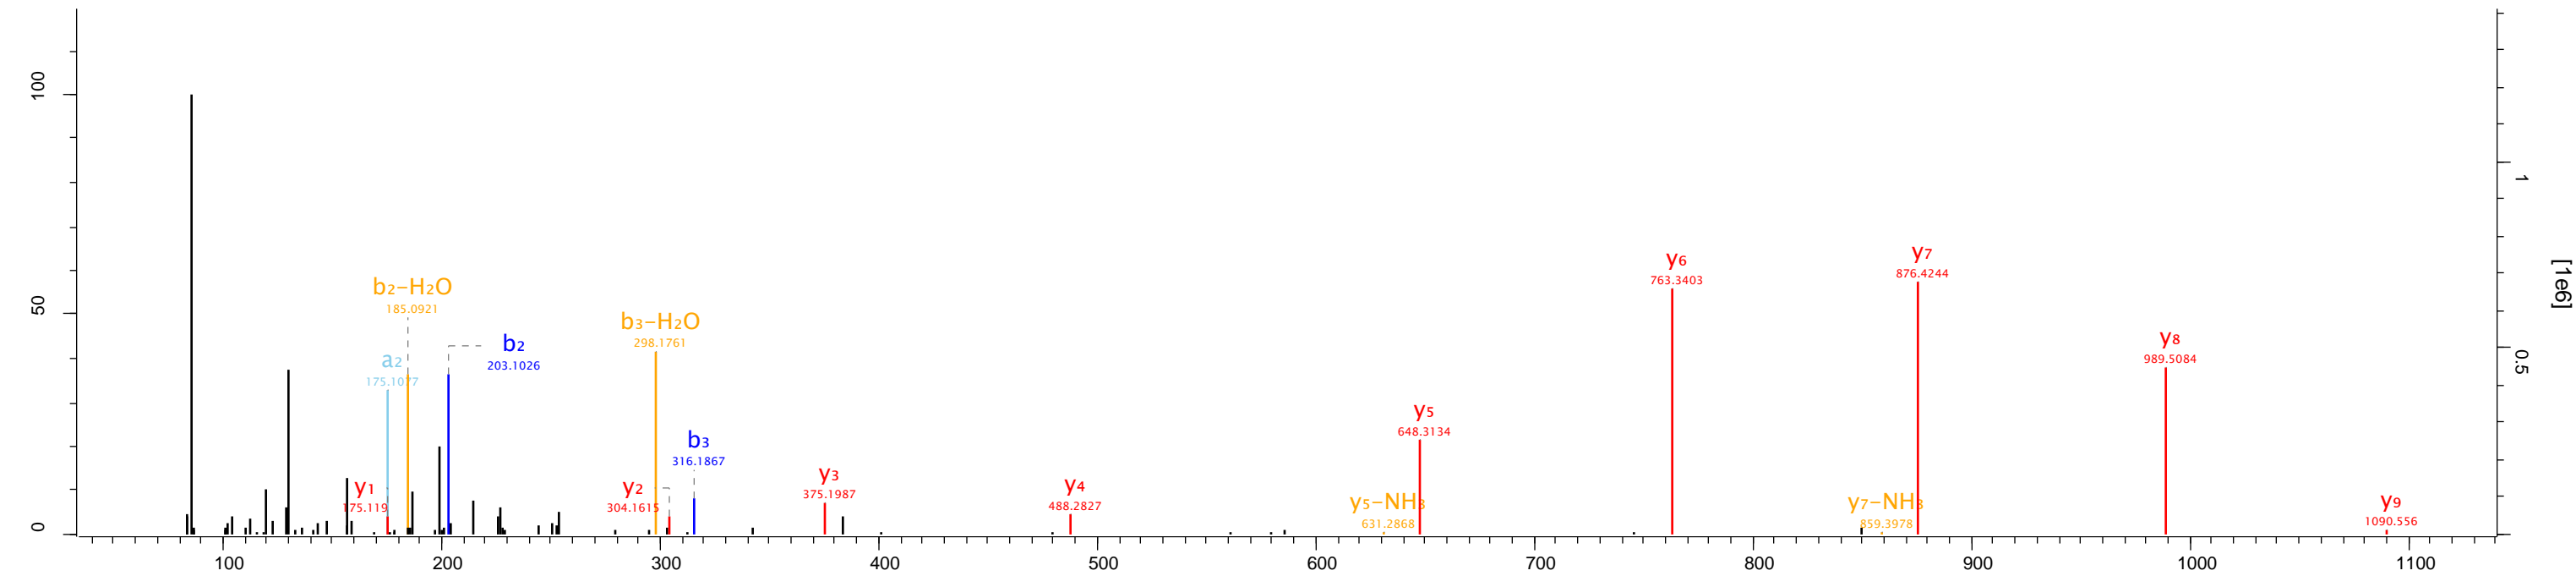

- T T L L D C L A E R -

Fragmentation scheme showing peptide sequence T T L L D C L A E R. The sequence is divided into fragments by red brackets labeled y1 through y9. Blue brackets labeled b2 and b3 are shown below the first two residues (T L).

Raw file

20140827\_EXQ00\_FaHo\_SA\_EAF3\_03

| Scan | Method    | Score | m/z    | Gene names                                  |
|------|-----------|-------|--------|---------------------------------------------|
| 7960 | FTMS; HCD | 97.24 | 880.47 | TY1B-NL1;TY1B-BL;TY1B-MR1;TY1A-DR2;TY1A-MR1 |

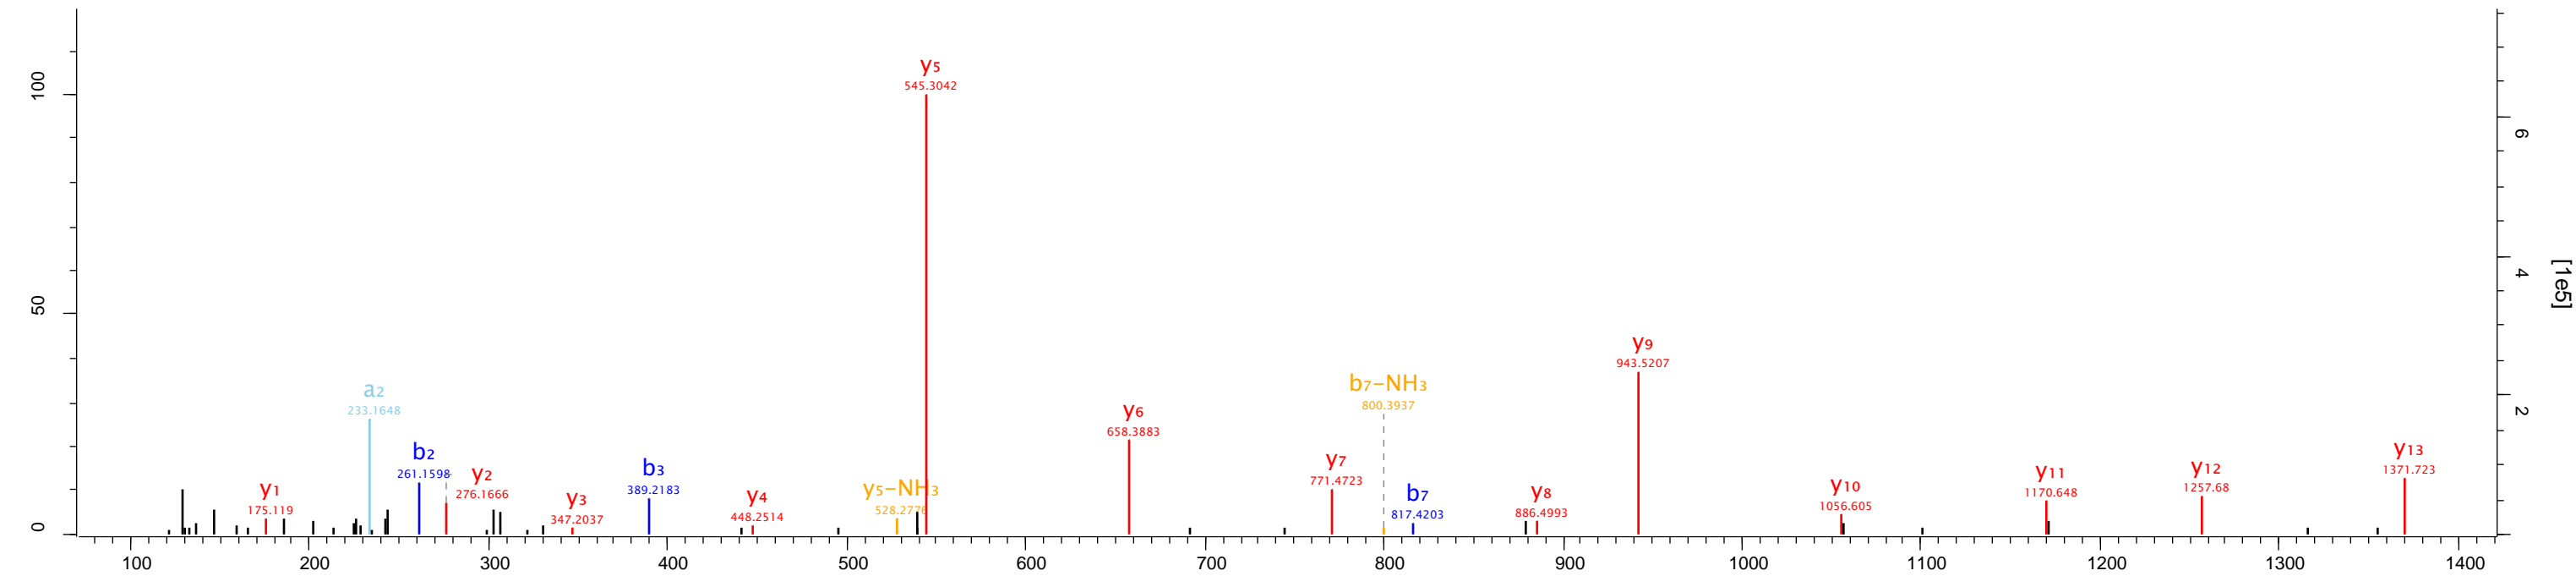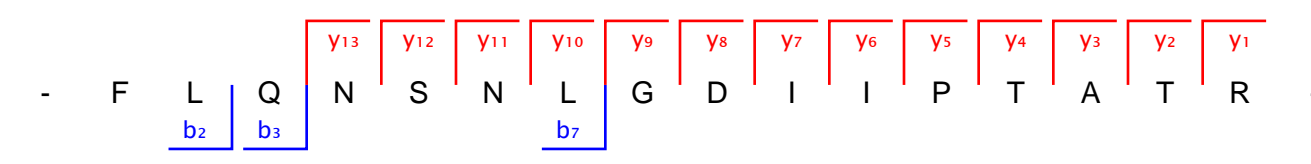

20140827\_EXQ00\_FaHo\_SA\_EAF3\_( 8092 FTMS; HCD 165.3 1125.52 TY1B-LR3;TY1A-PL;TY1A-LR2;TY1A-ER1;TY1A-DR6;TY1B-OL;TY1B-LR4;TY1B-LR2;TY1B-PL;TY1B-ER1;TY1B-PR3;TY1A-PR1;TY1A-A;TY1A-DR4;TY1B-H;TY1B-GR2;TY1B-MR2;TY1B-ER2;TY1B-OR;TY1B-BR;TY1B-DR1;TY1B-NL

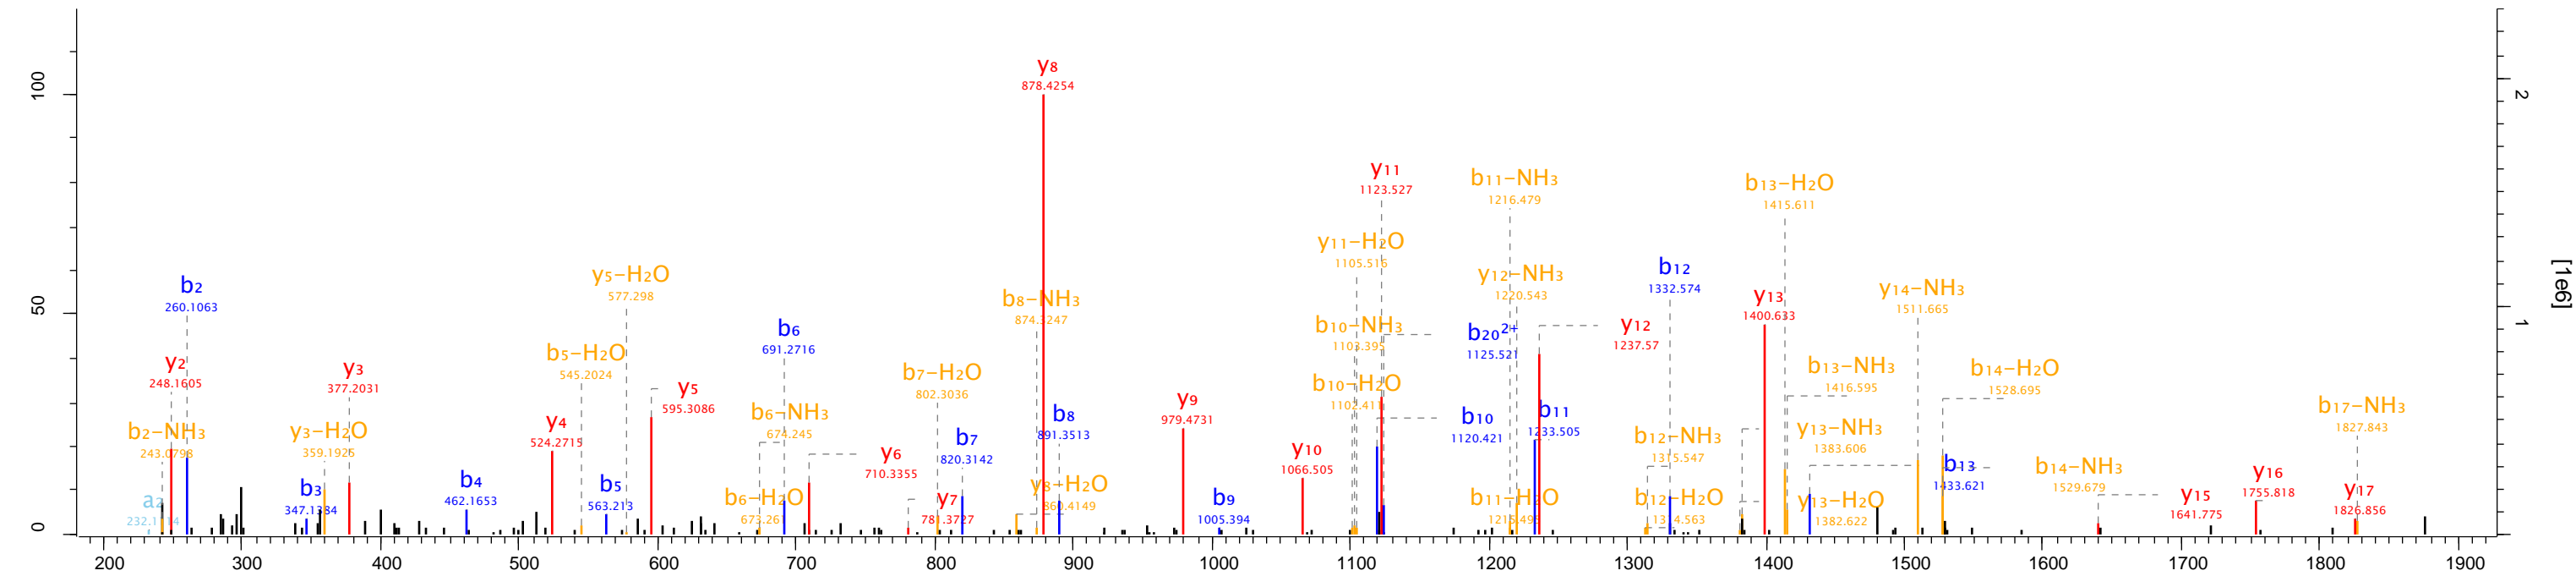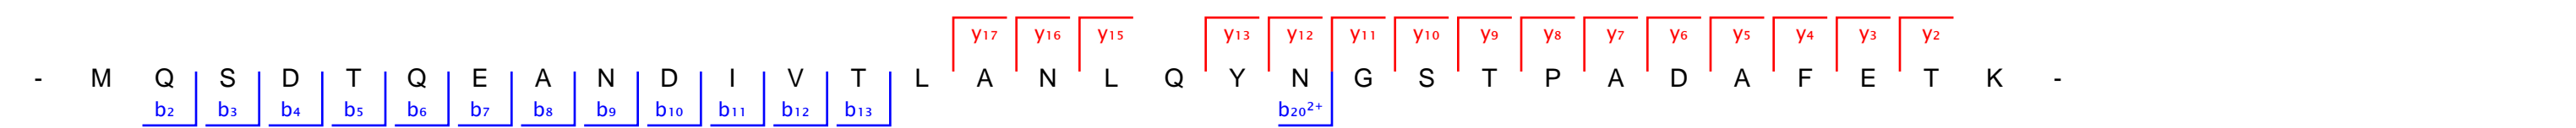

Raw file: 20140827\_EXQ00\_FaHo\_SA\_ECM5\_01  
 Scan: 6608 Method: FTMS; HCD Score: 69.34 m/z: 625.83 Gene names: PDR5;PDR10

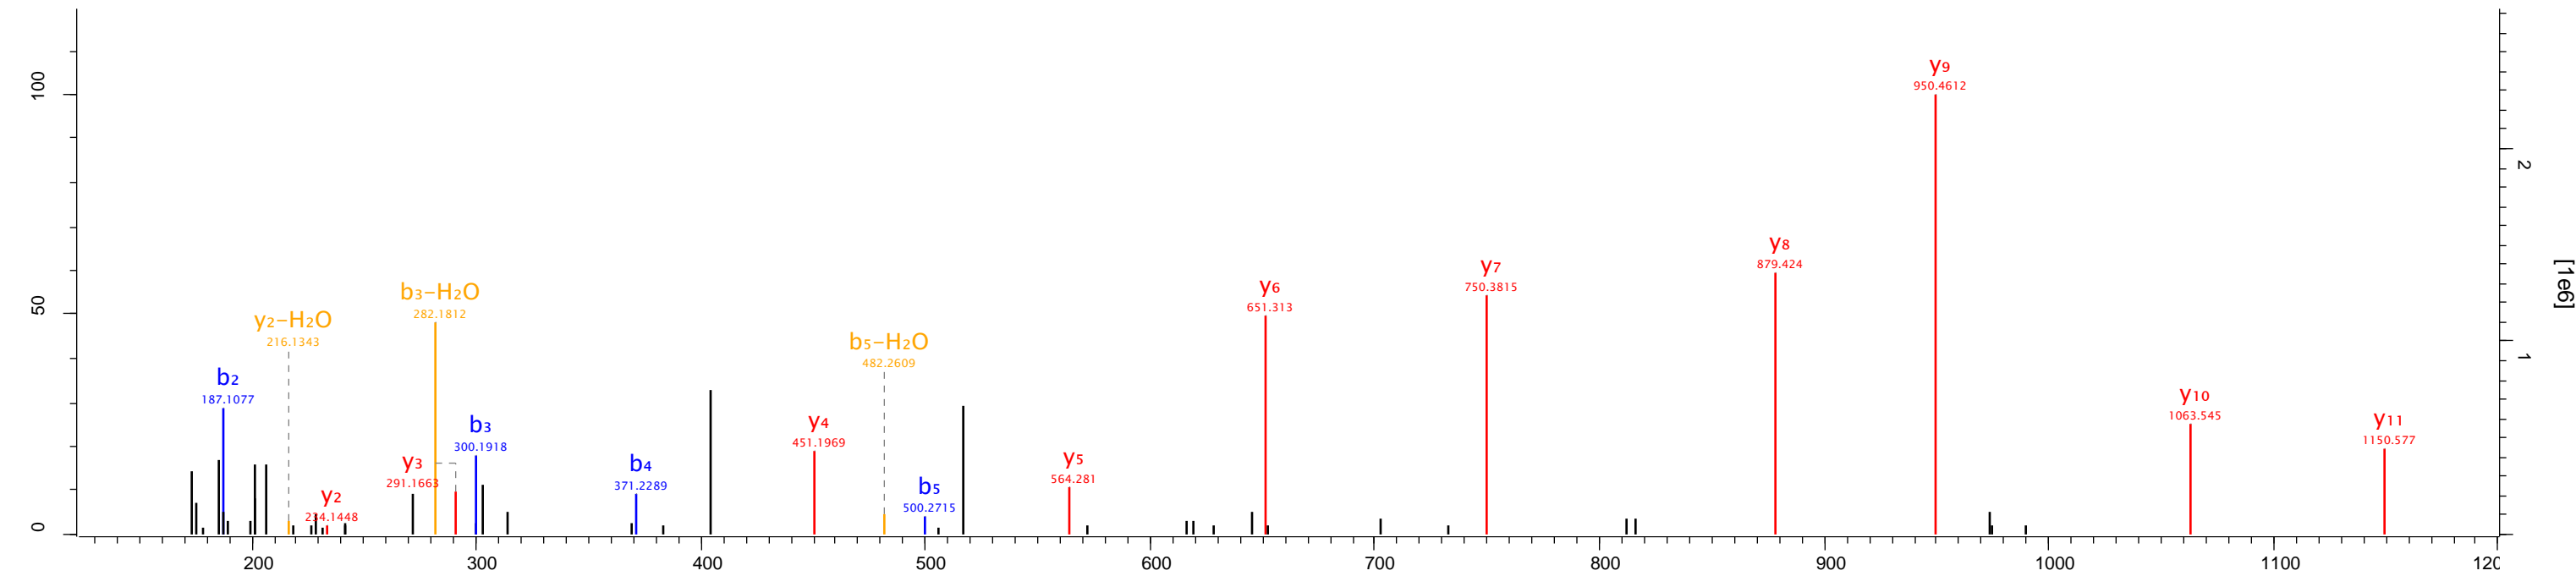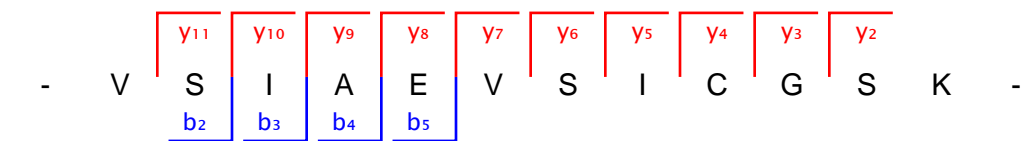



Raw file 20140827\_EXQ00\_FaHo\_SA\_ECM5\_01 Scan 8895 Method FTMS; HCD Score 96.46 m/z 724.89 Gene names GRX1

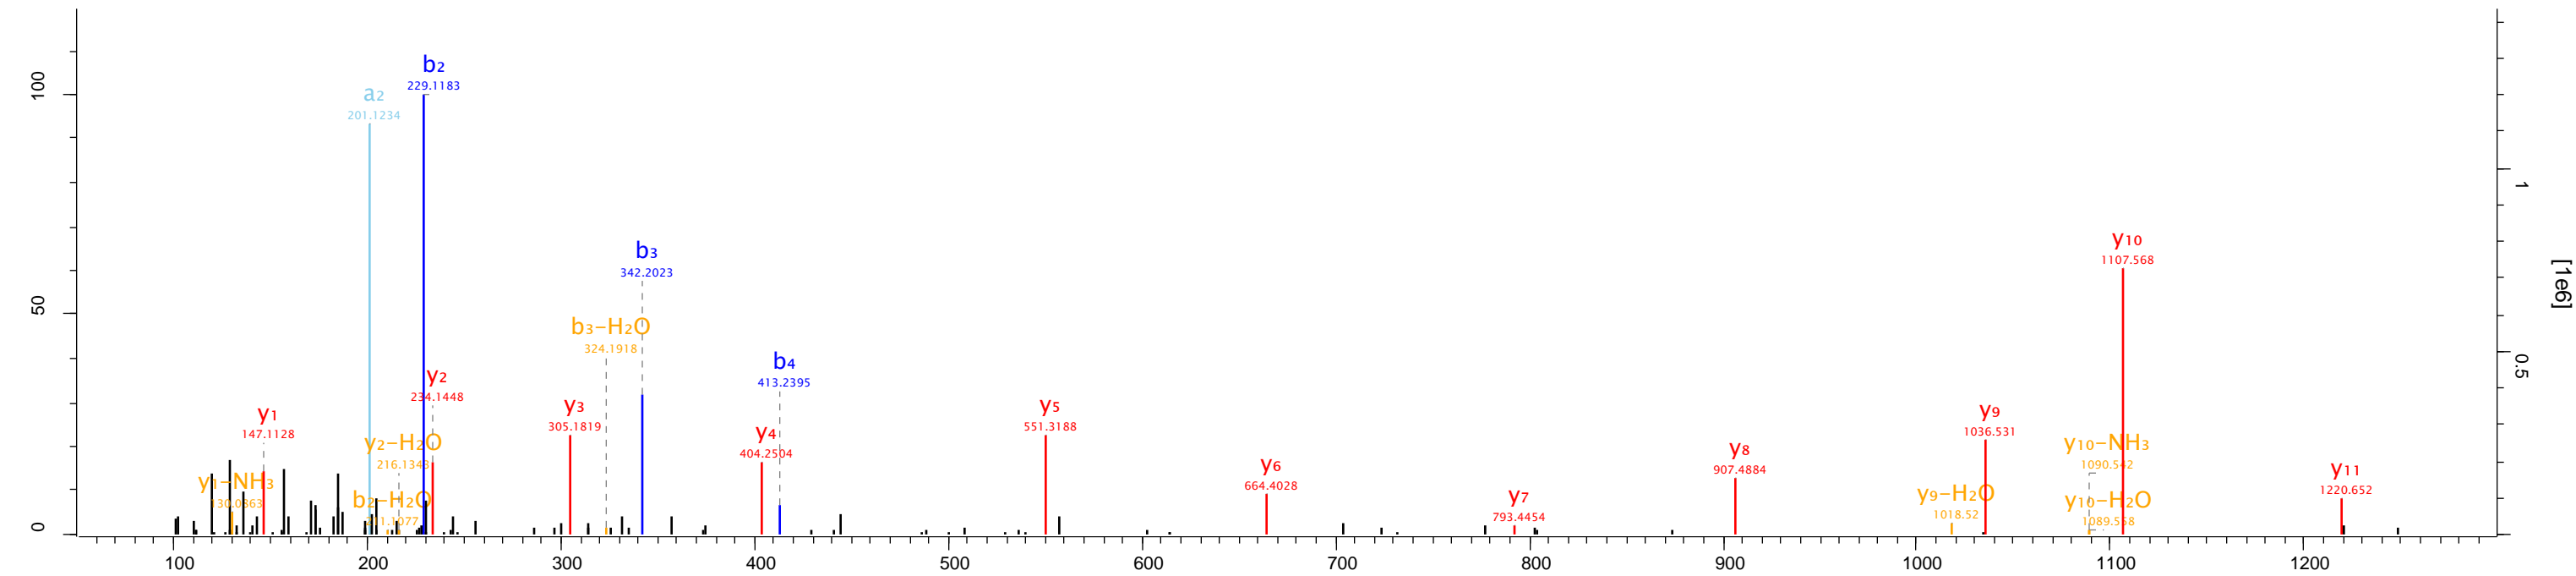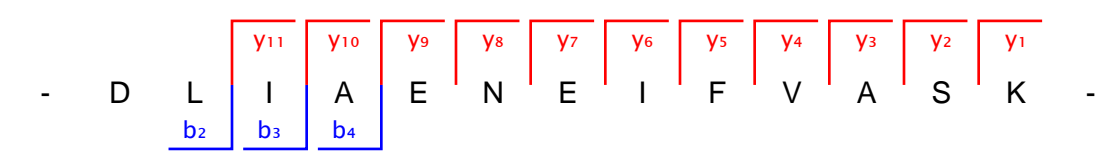

Raw file: 20140827\_EXQ00\_FaHo\_SA\_ECM5\_02  
 Scan: 2683 Method: FTMS; HCD Score: 105.46 m/z: 549.29 Gene names: TSC13

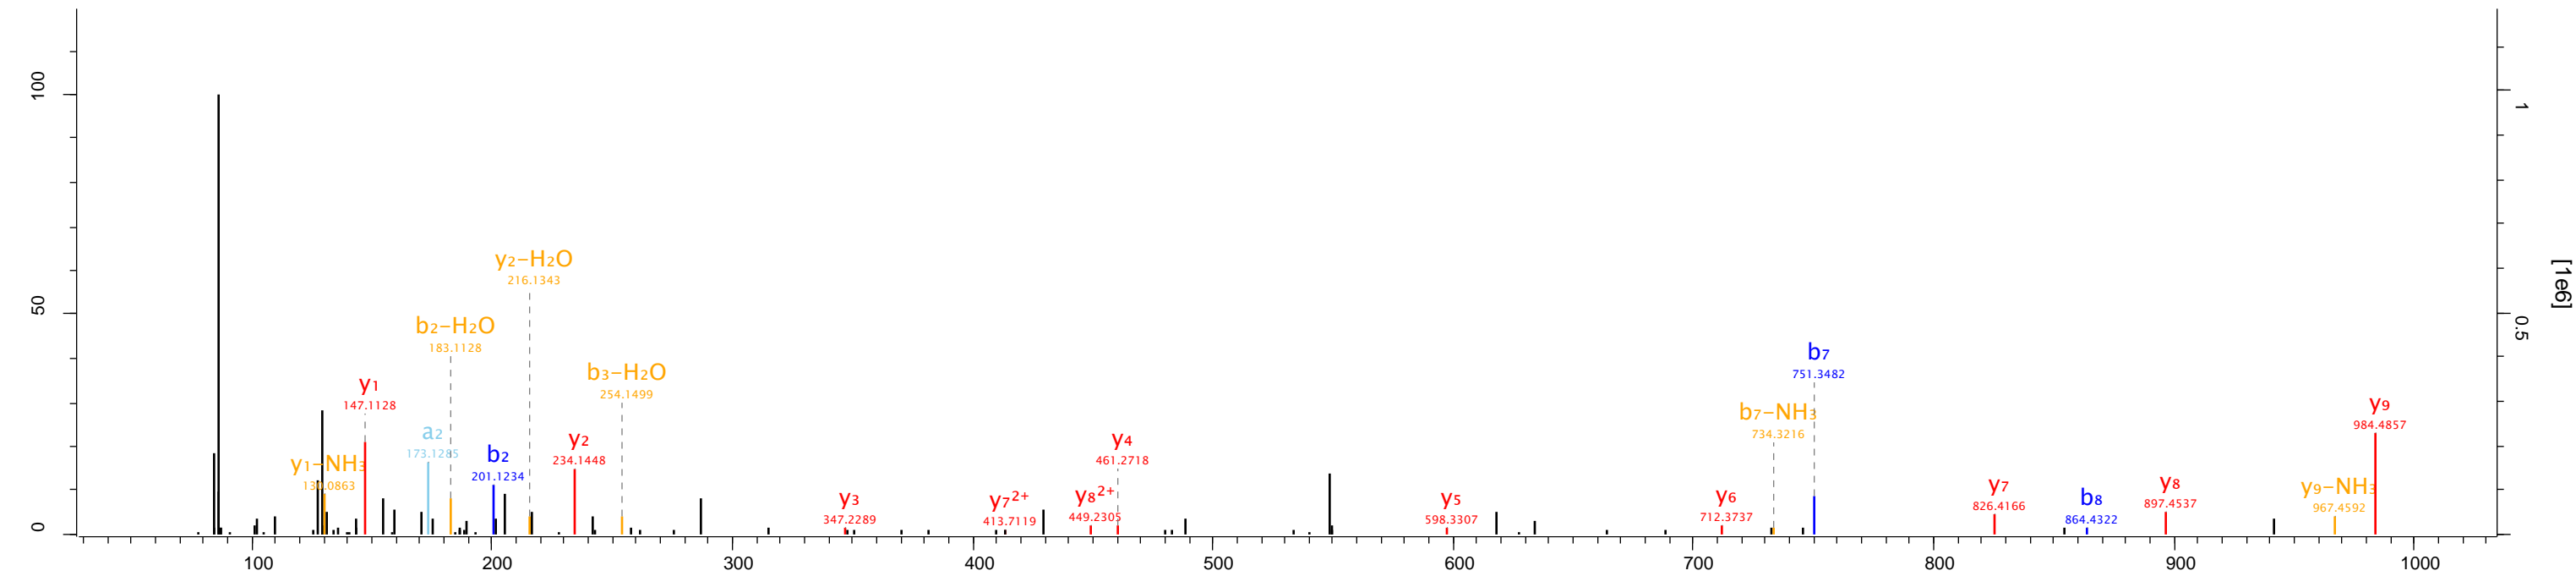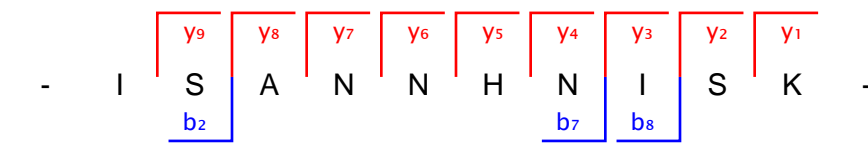

Raw file 20140827\_EXQ00\_FaHo\_SA\_ECM5\_02 Scan 3206 Method FTMS; HCD Score 141.73 m/z 482.22 Gene names RPL4B;RPL4A

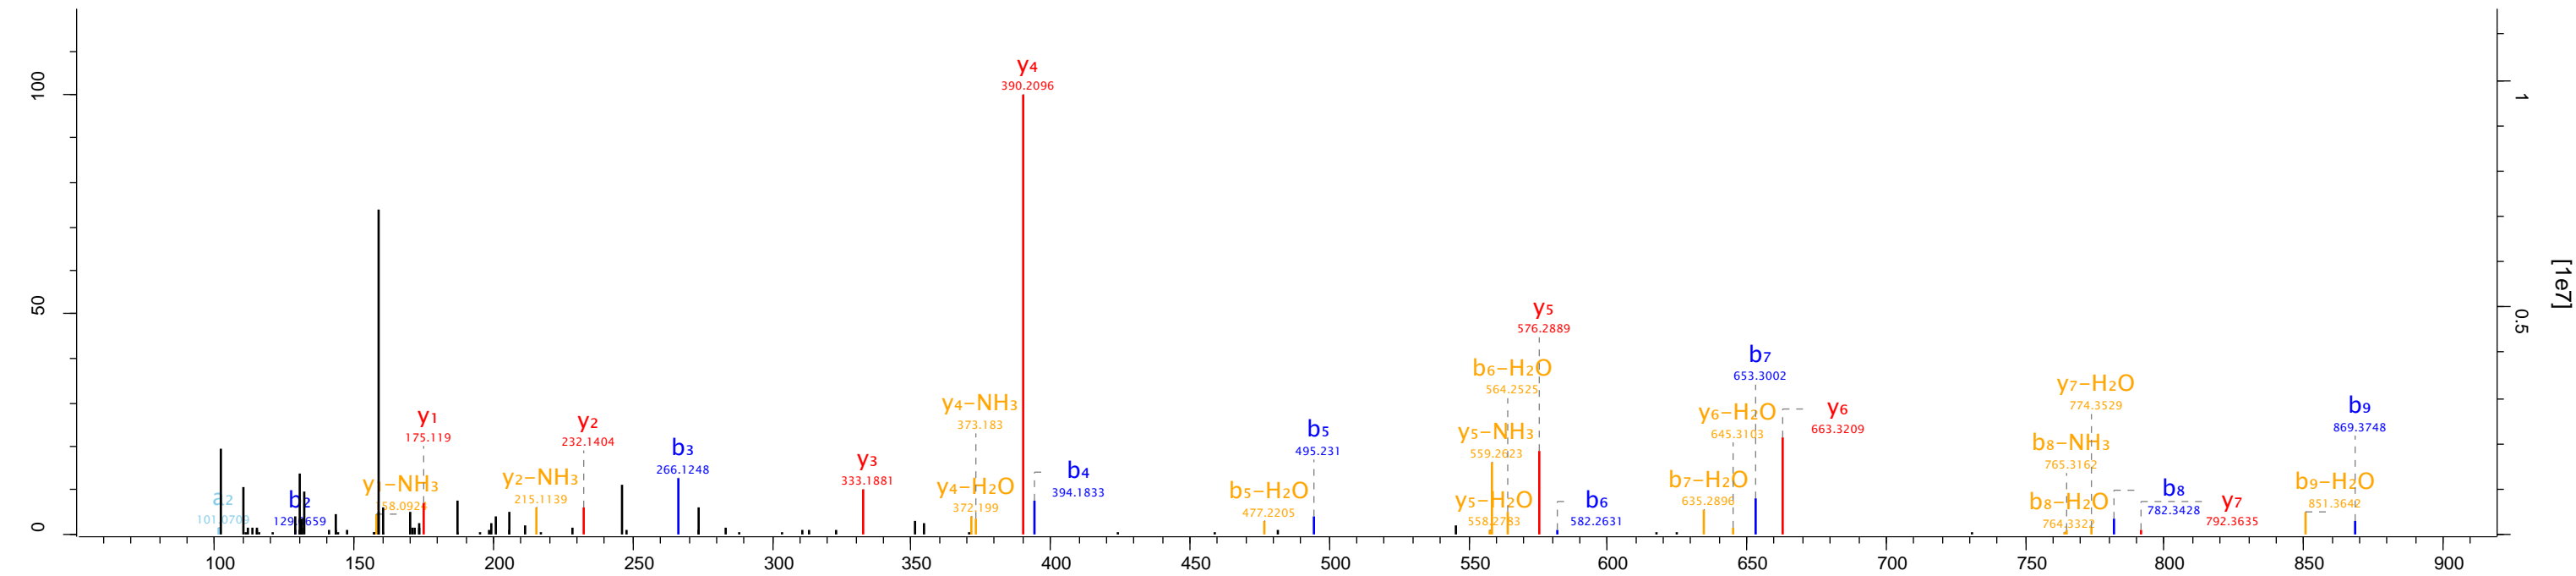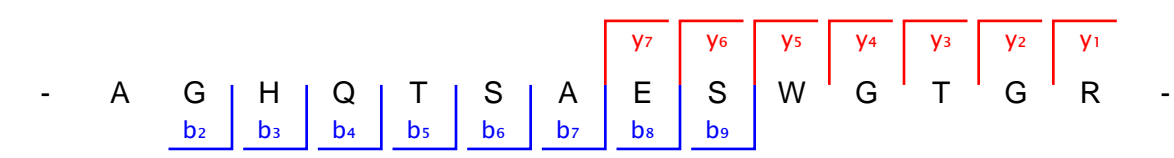

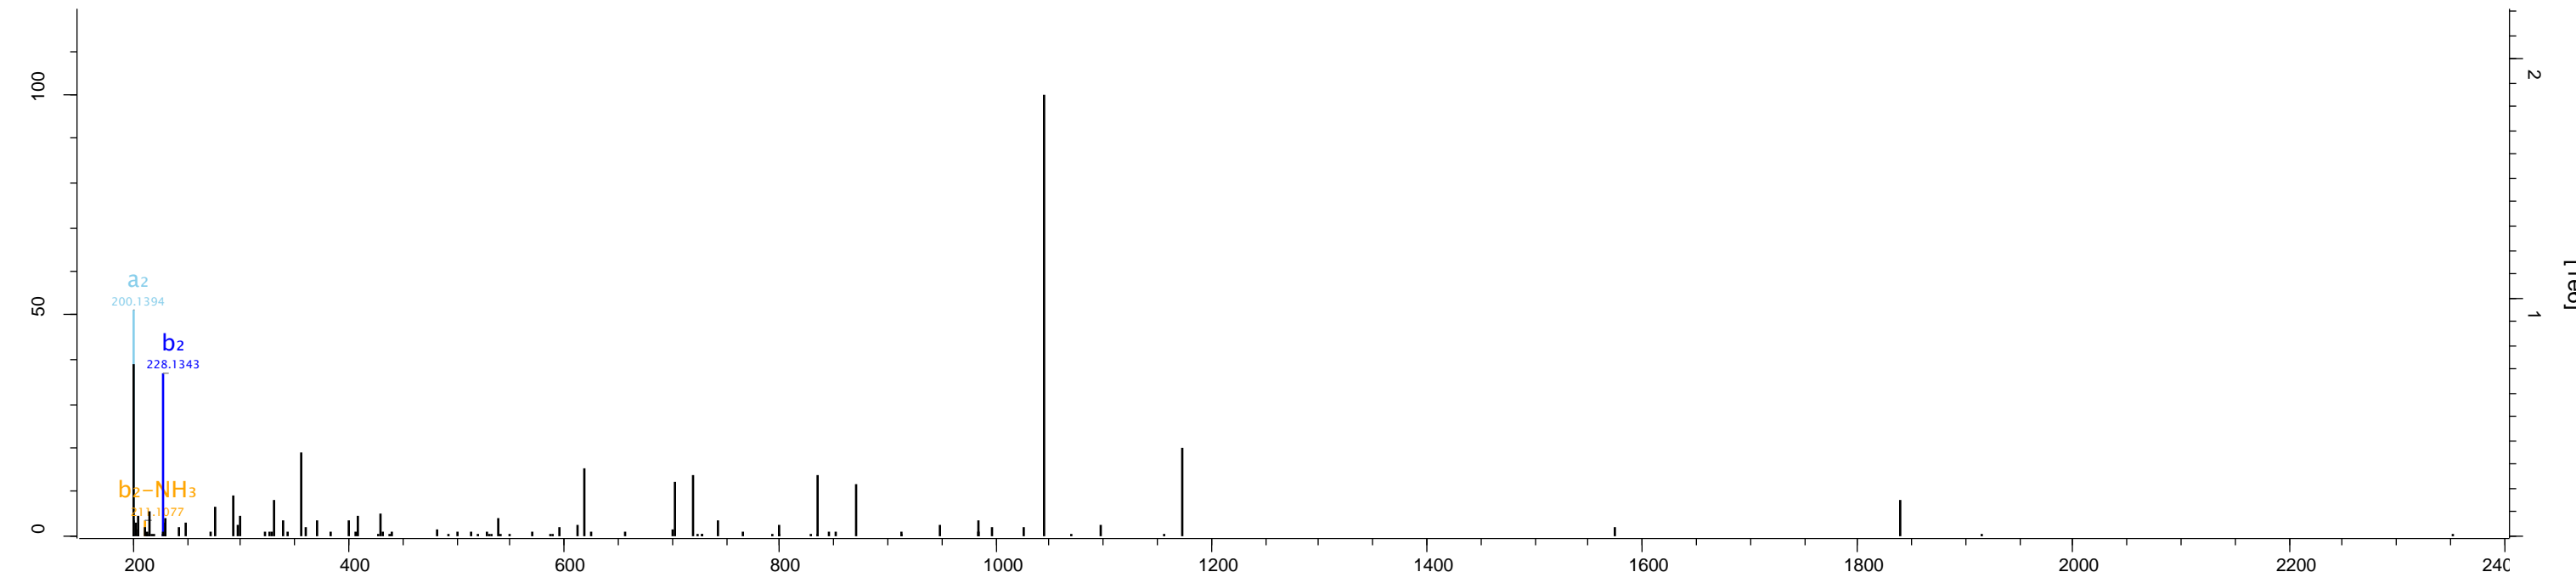

- L N I R E Y E V K S C G V S A T C S L A I F E R -

b2

Raw file 20140827\_EXQ00\_FaHo\_SA\_ECM5\_03 Scan 3094 Method FTMS; HCD Score 57.28 m/z 414.75 Gene names RPL24A;RPL24B

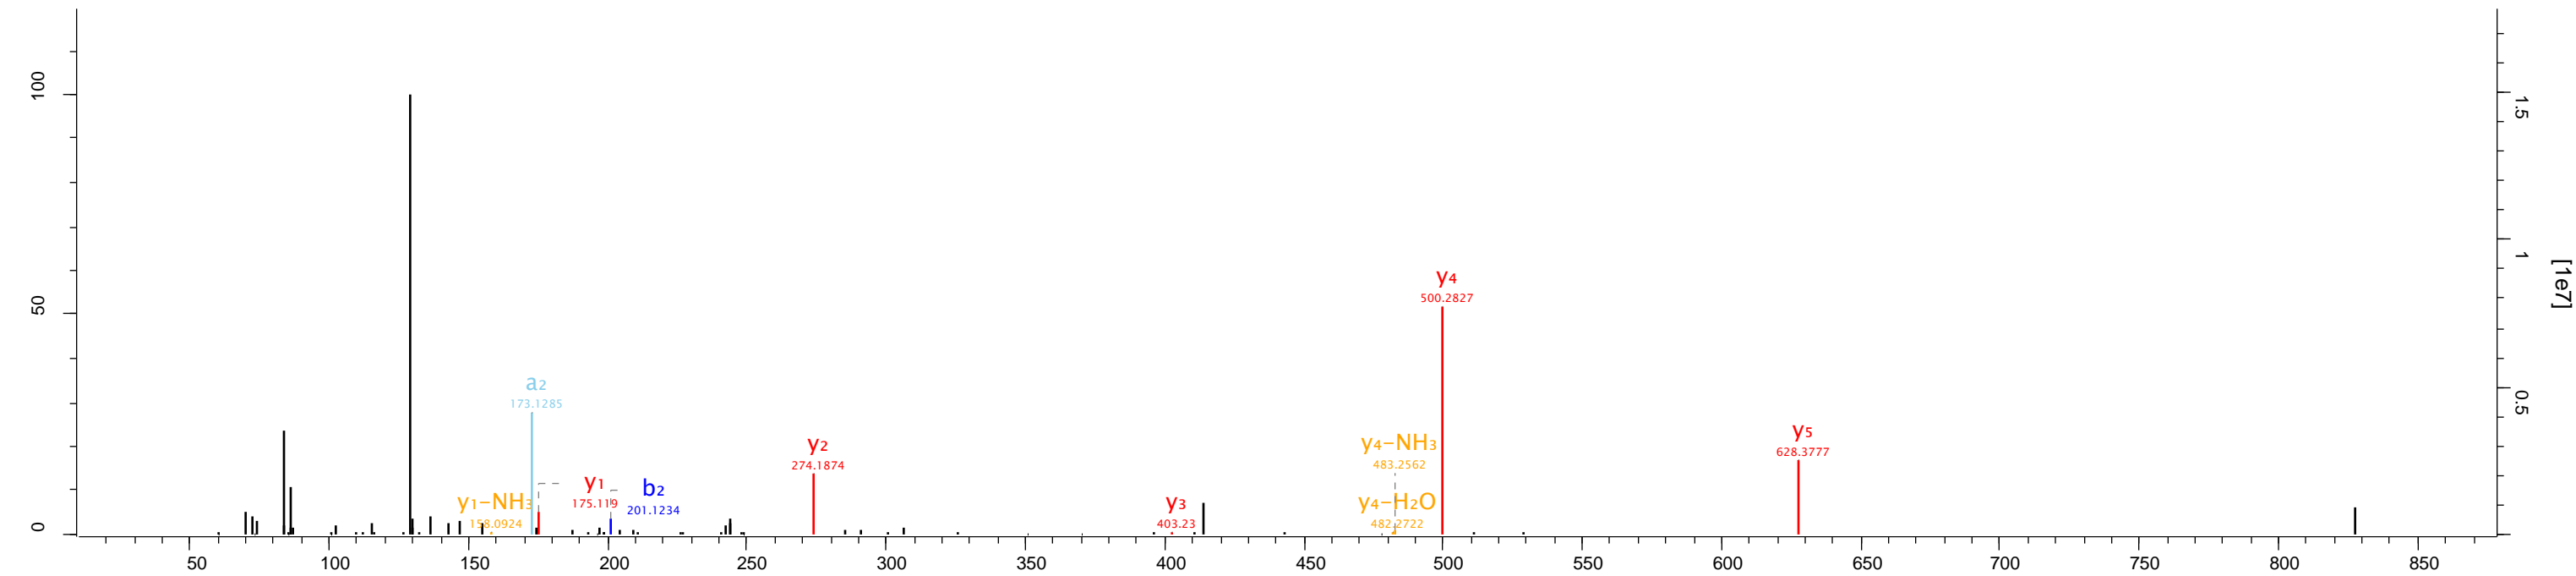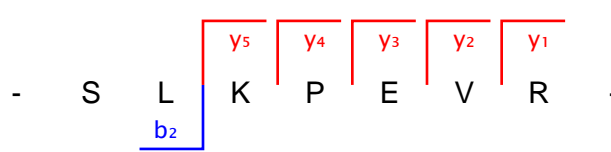

Raw file 20140827\_EXQ00\_FaHo\_SA\_ECM5\_03 Scan 3380 Method FTMS; HCD Score 105.52 m/z 486.76 Gene names RPL36B

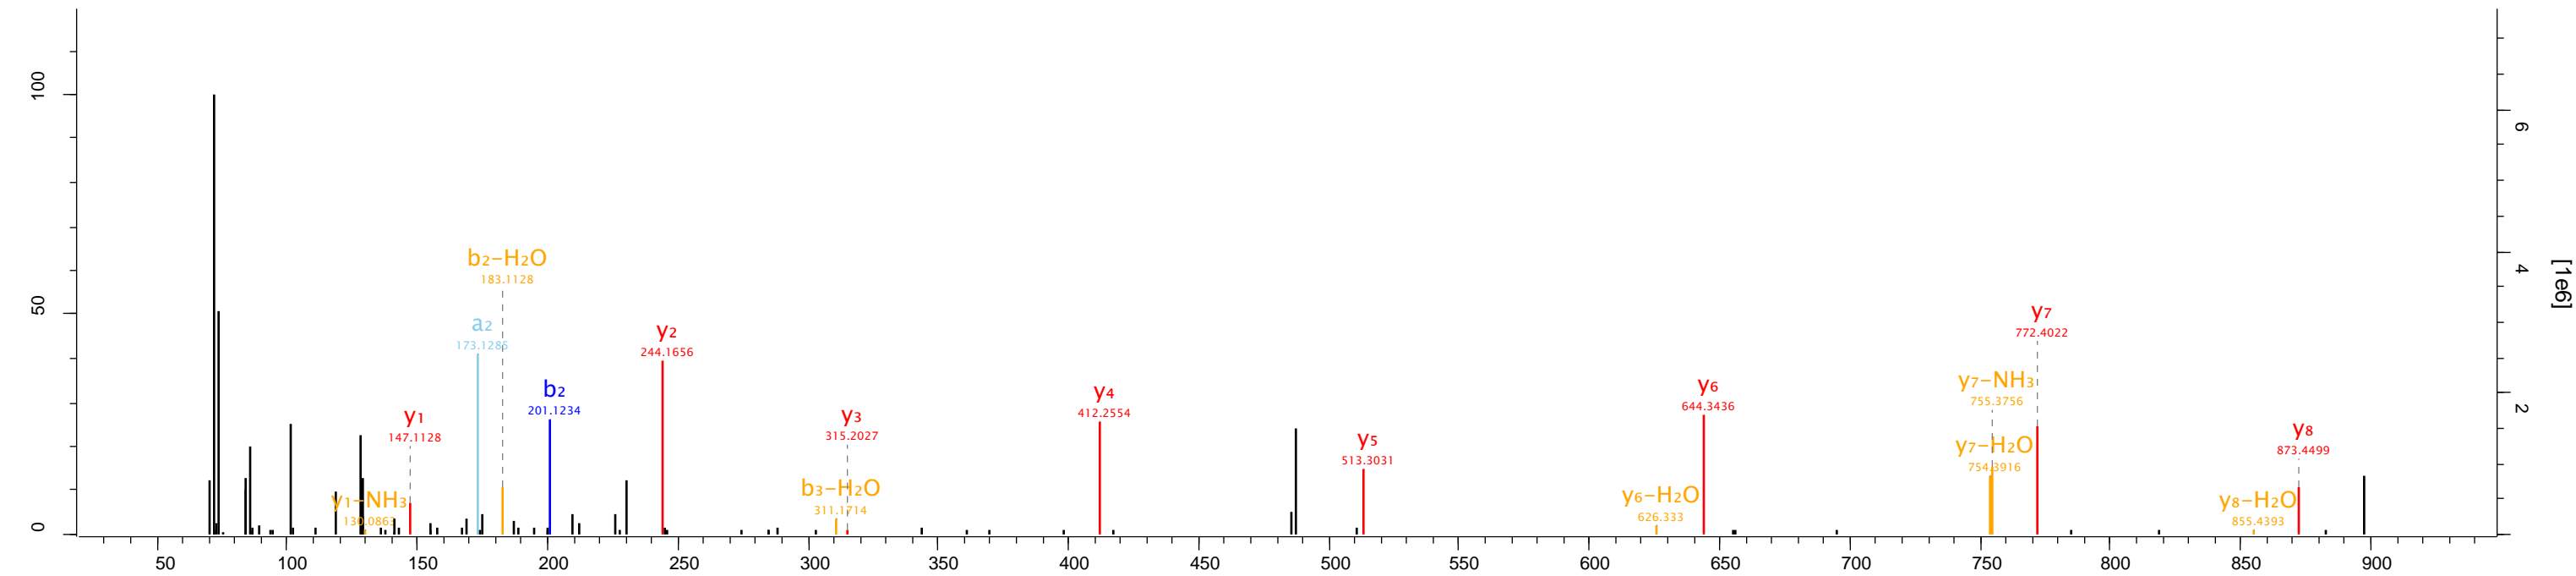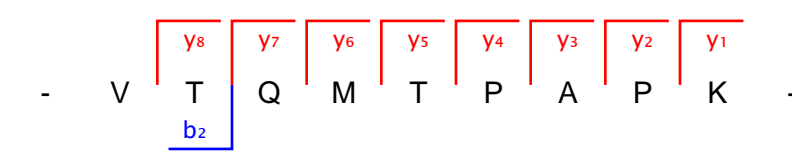

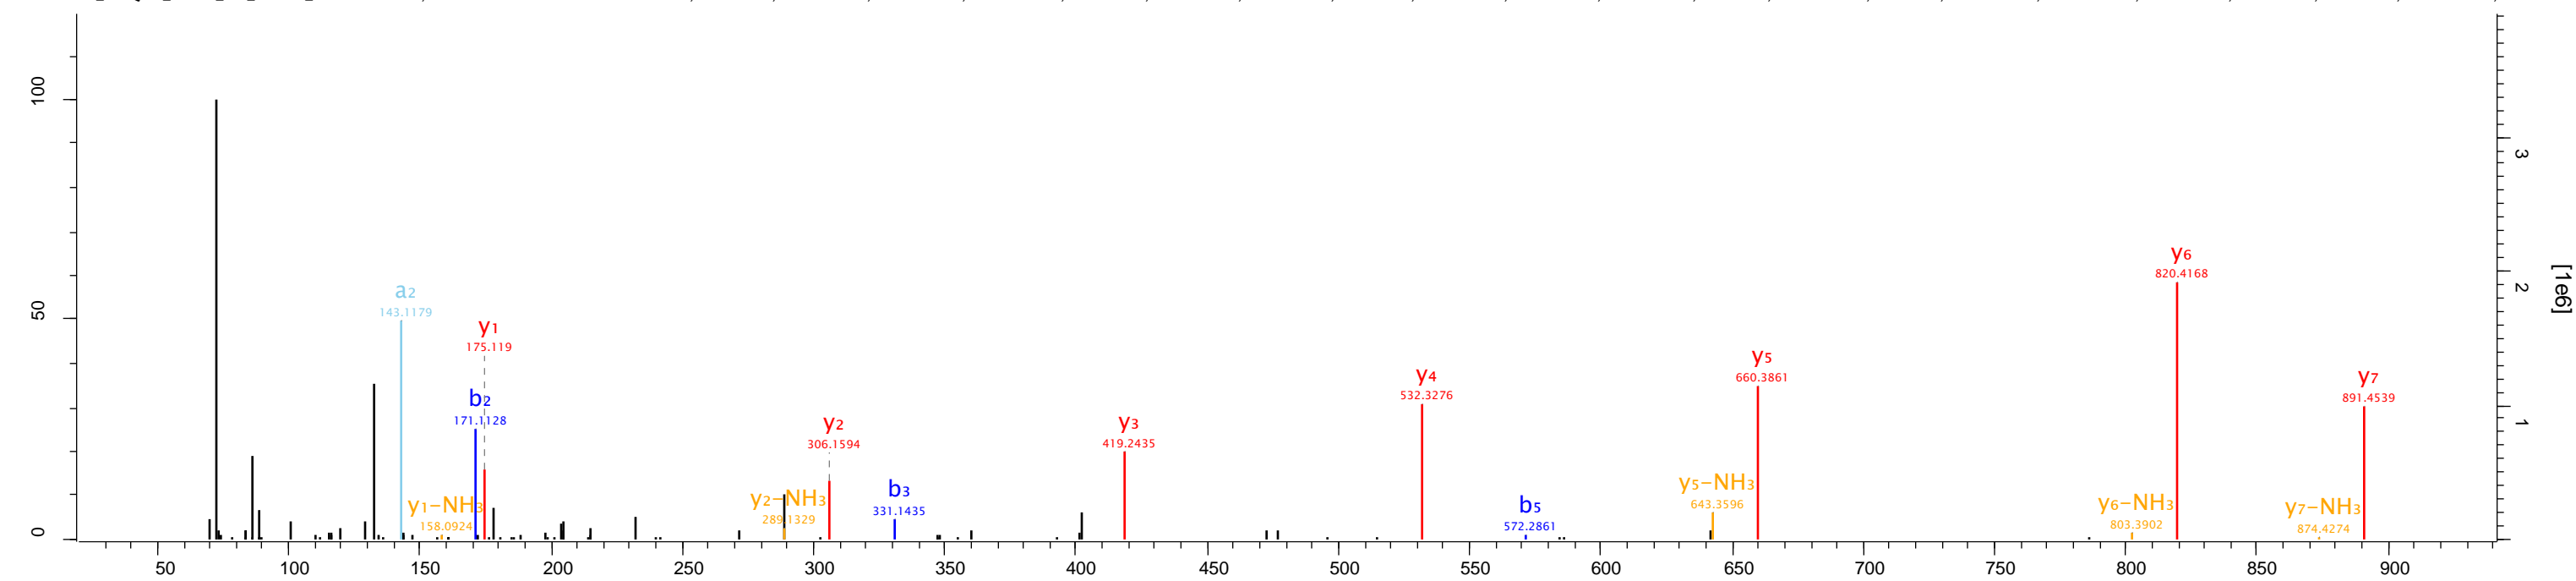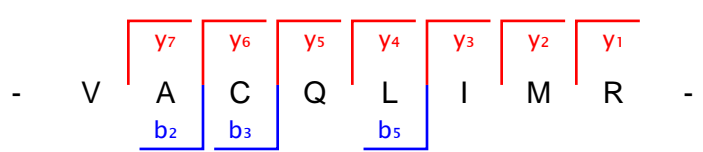

Raw file 20140827\_EXQ00\_FaHo\_SA\_ECM5\_03 Scan 7295 Method FTMS; HCD Score 92.04 m/z 775.38 Gene names PGA2

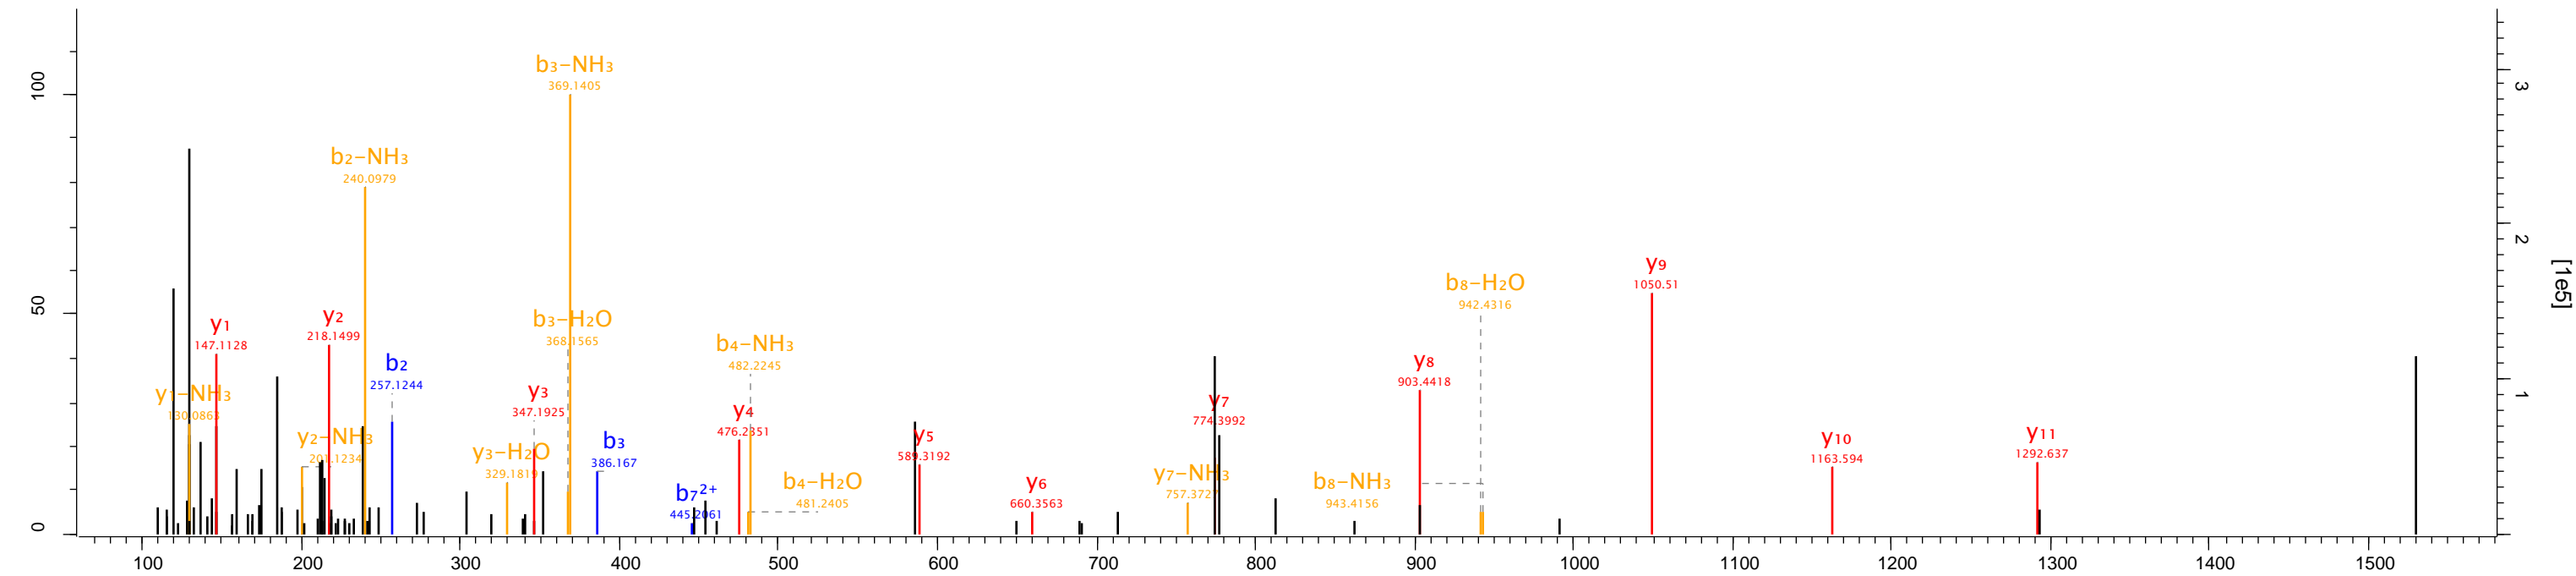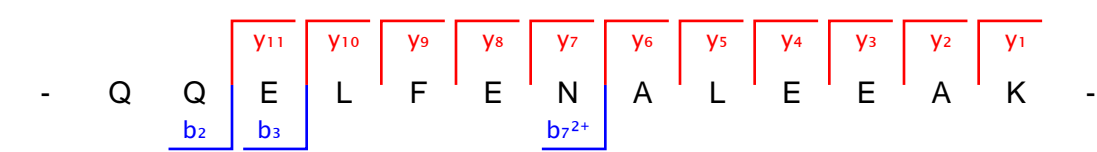



Raw file 20140827\_EXQ00\_FaHo\_SA\_ECM5\_03 Scan 7349 Method FTMS; HCD Score 74.08 m/z 593.33 Gene names NCE102

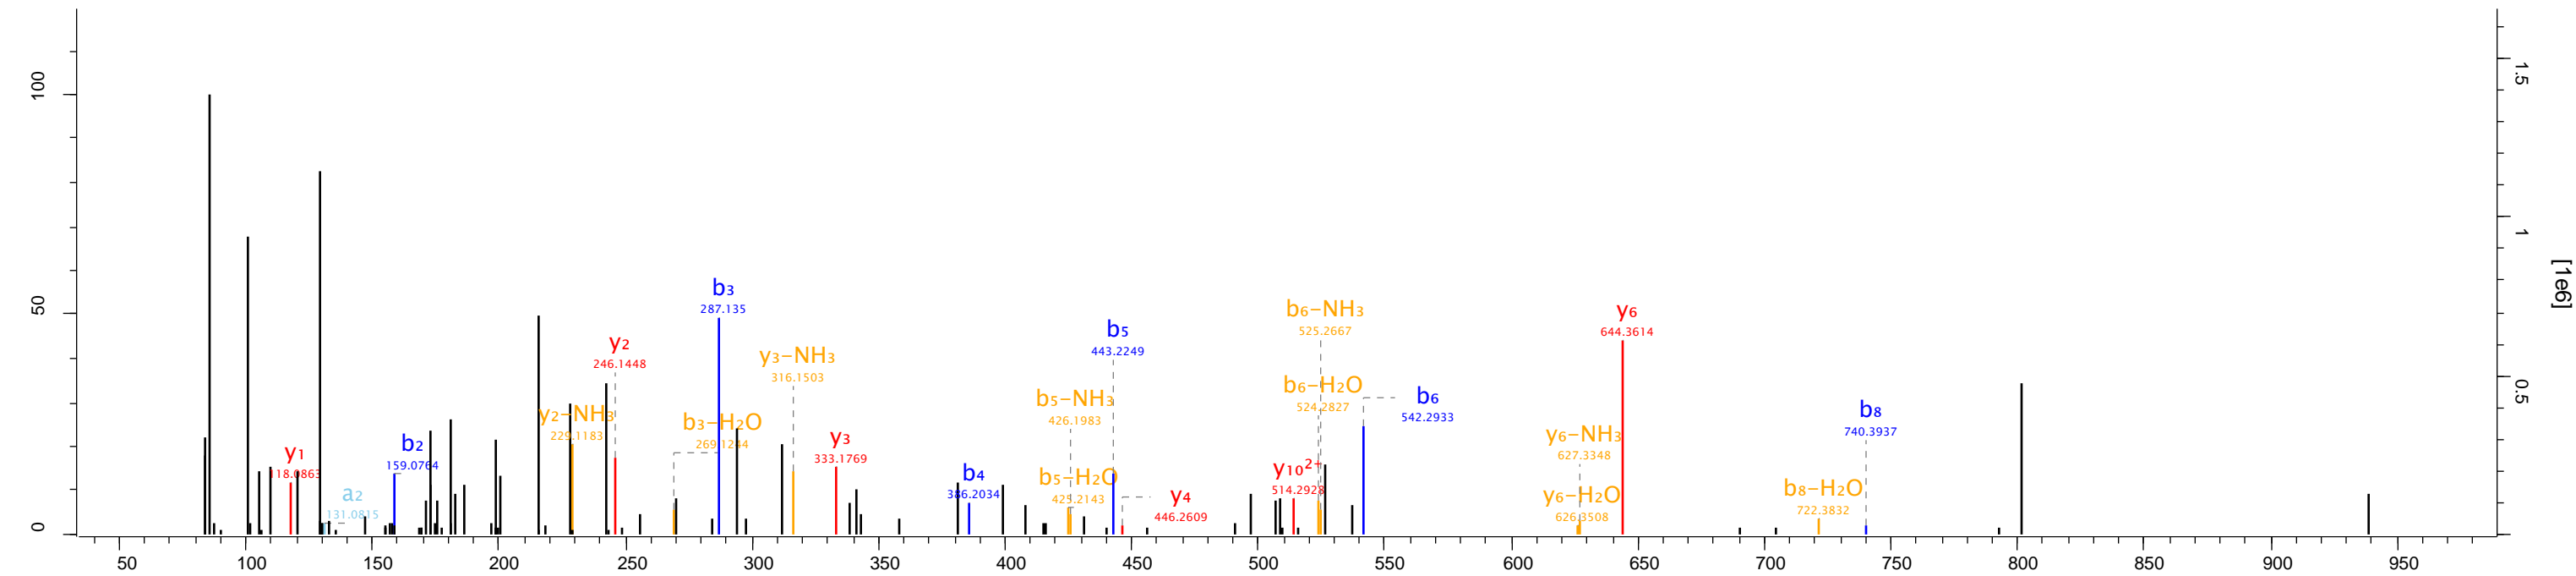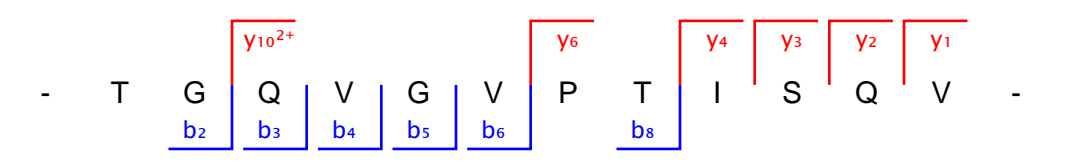

Raw file: 20140827\_EXQ00\_FaHo\_SA\_ECM5\_03  
 Scan: 7535 Method: FTMS; HCD Score: 51.77 m/z: 580.31 Gene names: NMA1

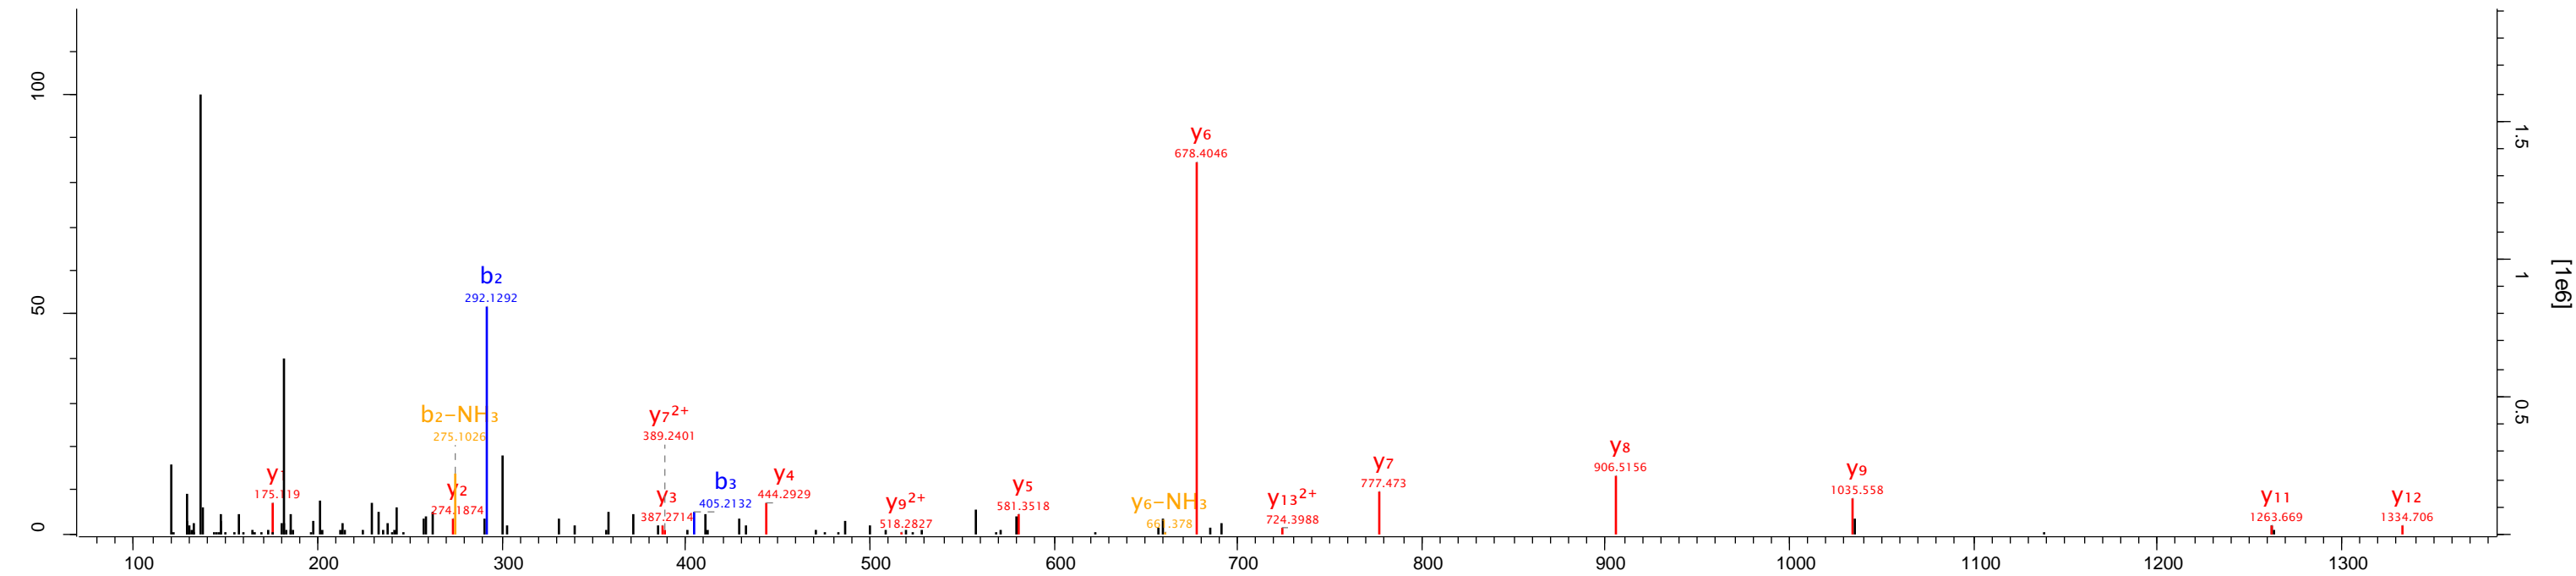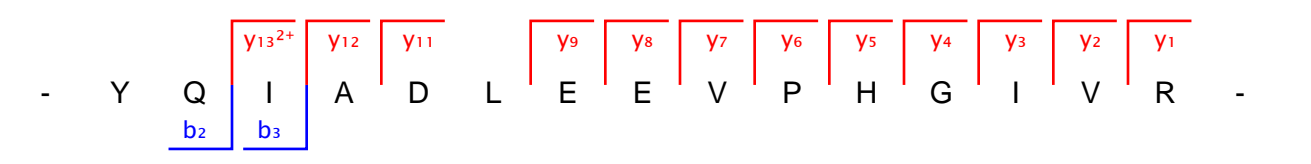

Raw file 20140827\_EXQ00\_FaHo\_SA\_ECM5\_03 Scan 8316 Method FTMS; HCD Score 79.87 m/z 715.9 Gene names DCW1

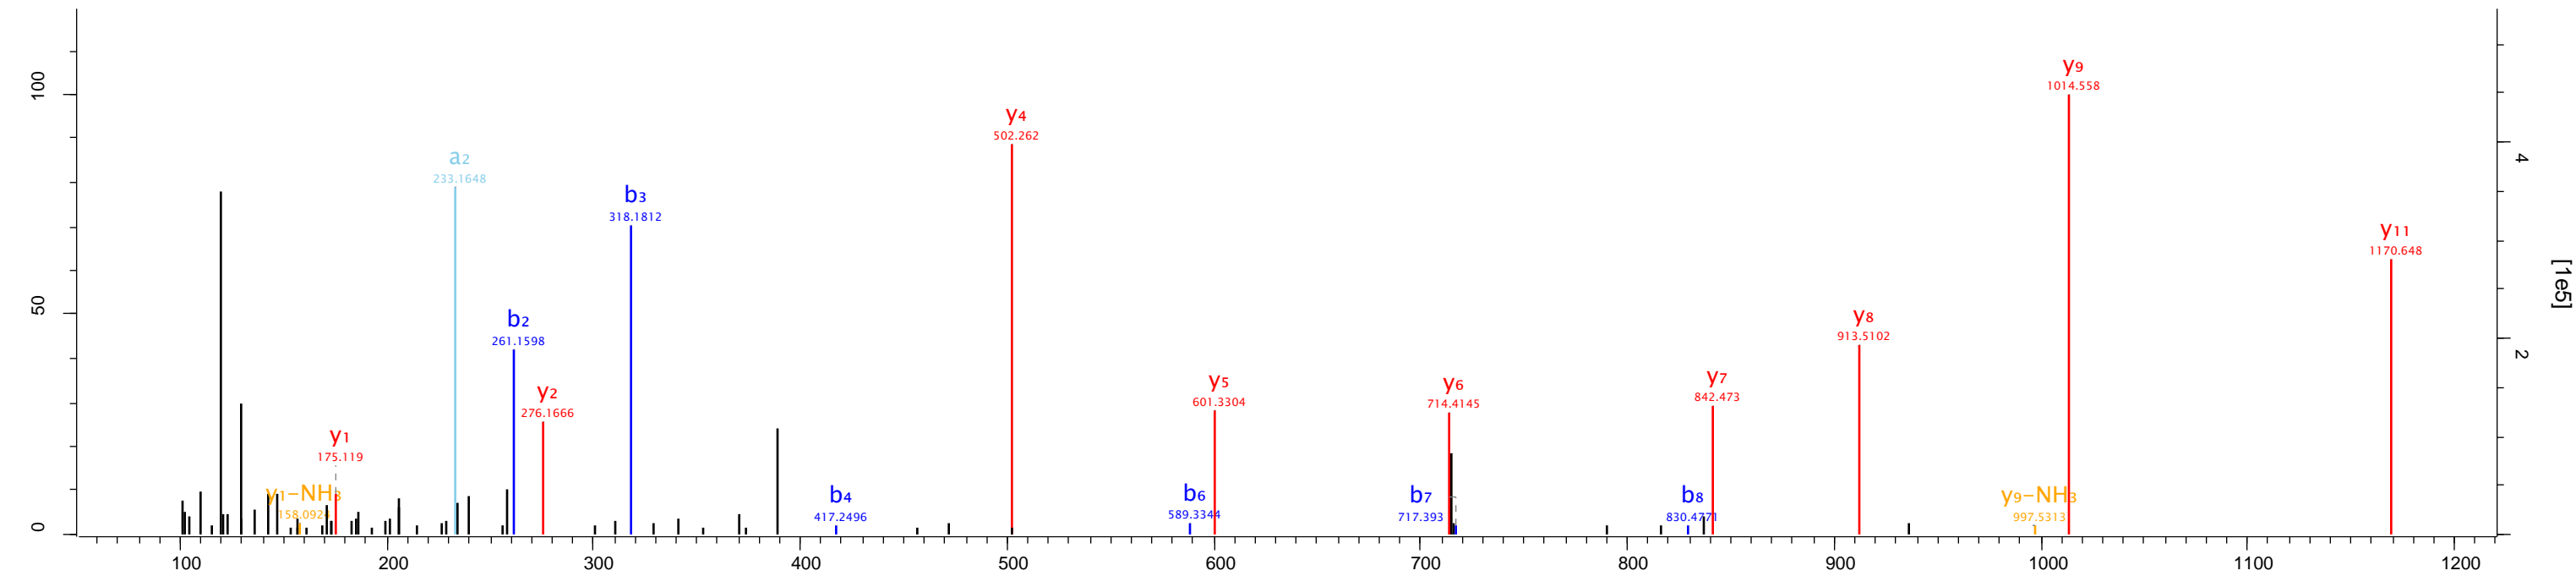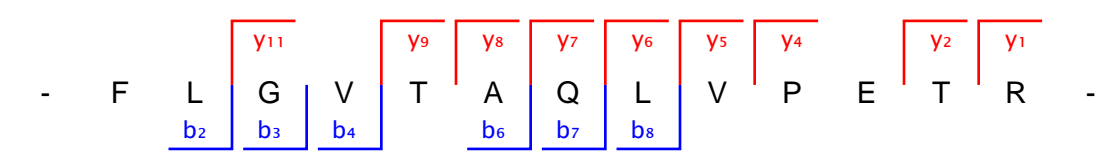

Raw file: 20140827\_EXQ00\_FaHo\_SA\_GCN5\_01  
 Scan: 3483 Method: FTMS; HCD Score: 115.92 m/z: 635.34 Gene names: RPS0A;RPS0B

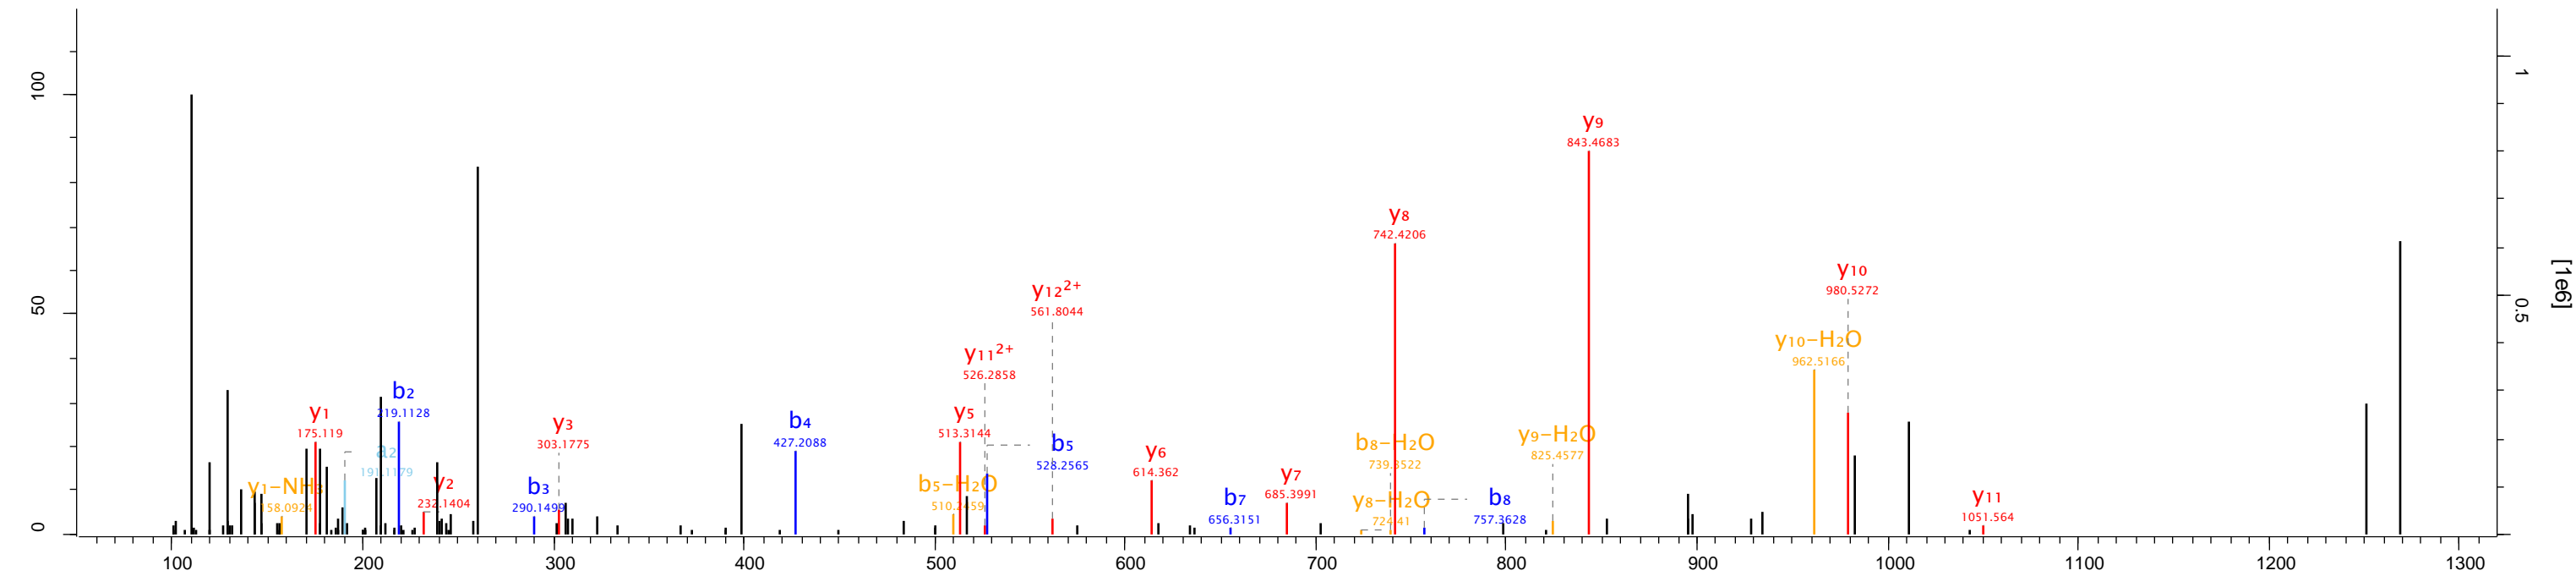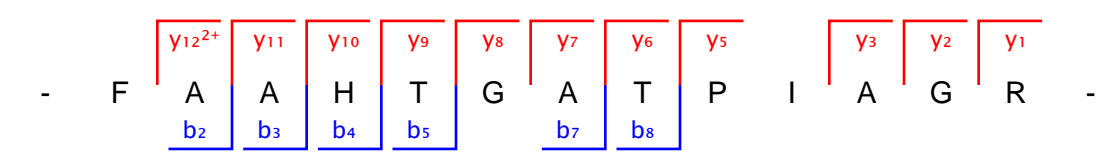

Raw file: 20140827\_EXQ00\_FaHo\_SA\_GCN5\_02  
 Scan: 4159 Method: FTMS; HCD Score: 54.2 m/z: 593.3 Gene names: ACT1

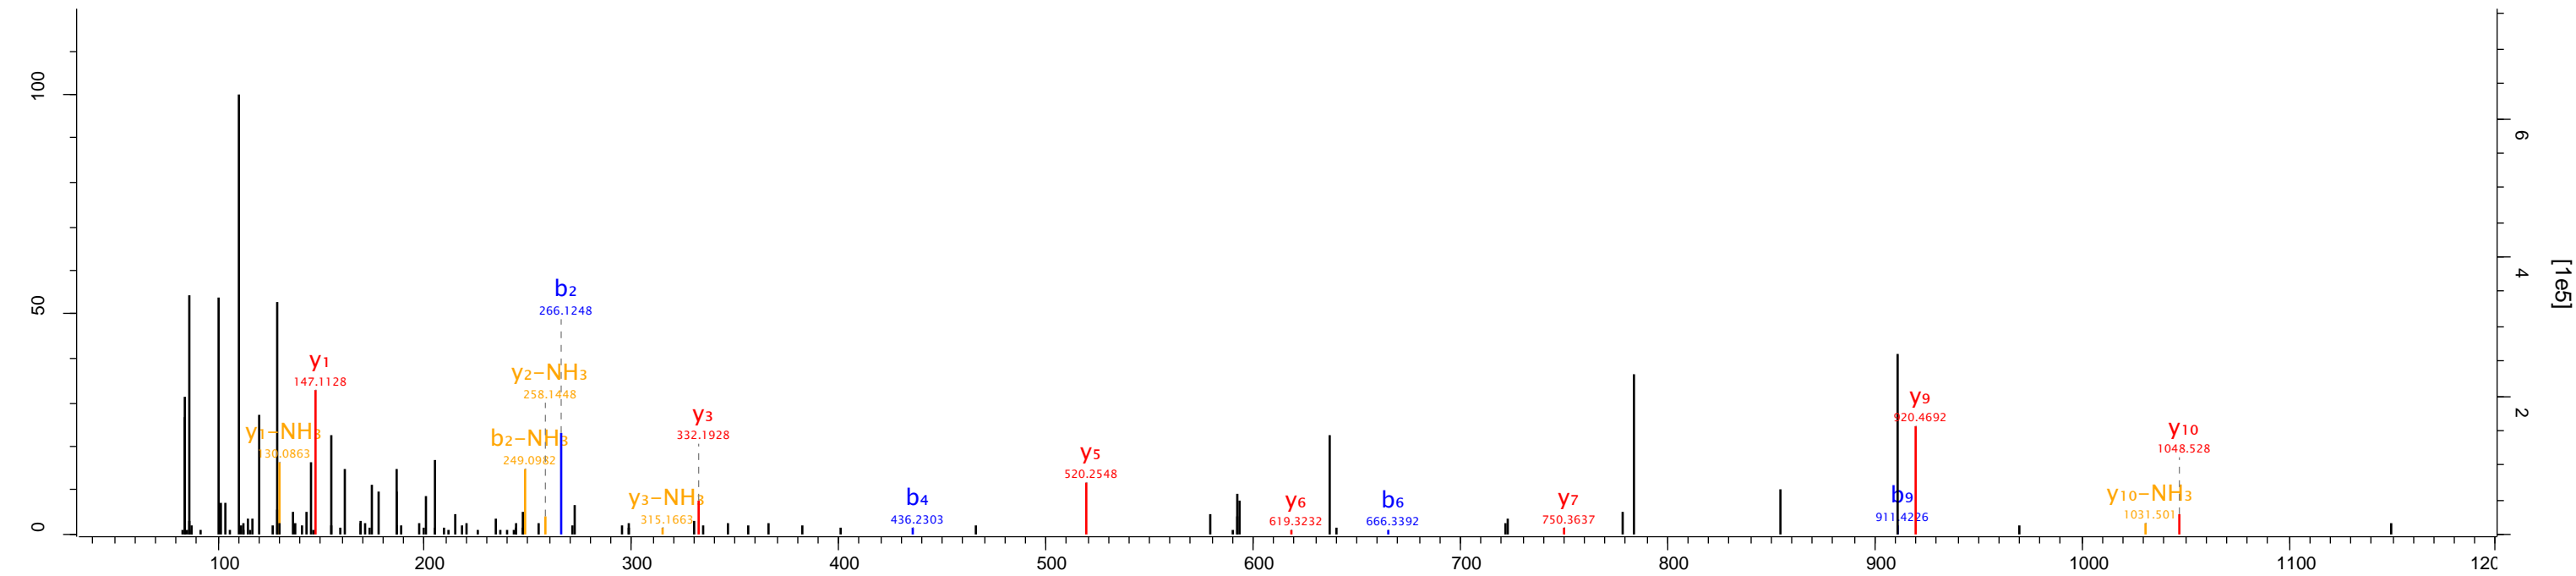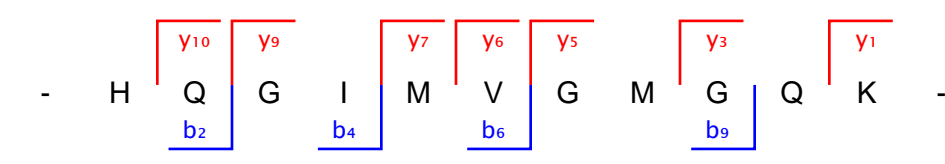

Raw file: 20140827\_EXQ00\_FaHo\_SA\_GCN5\_03  
 Scan: 3285 Method: FTMS; HCD Score: 47.71 m/z: 383.95 Gene names: HPC2

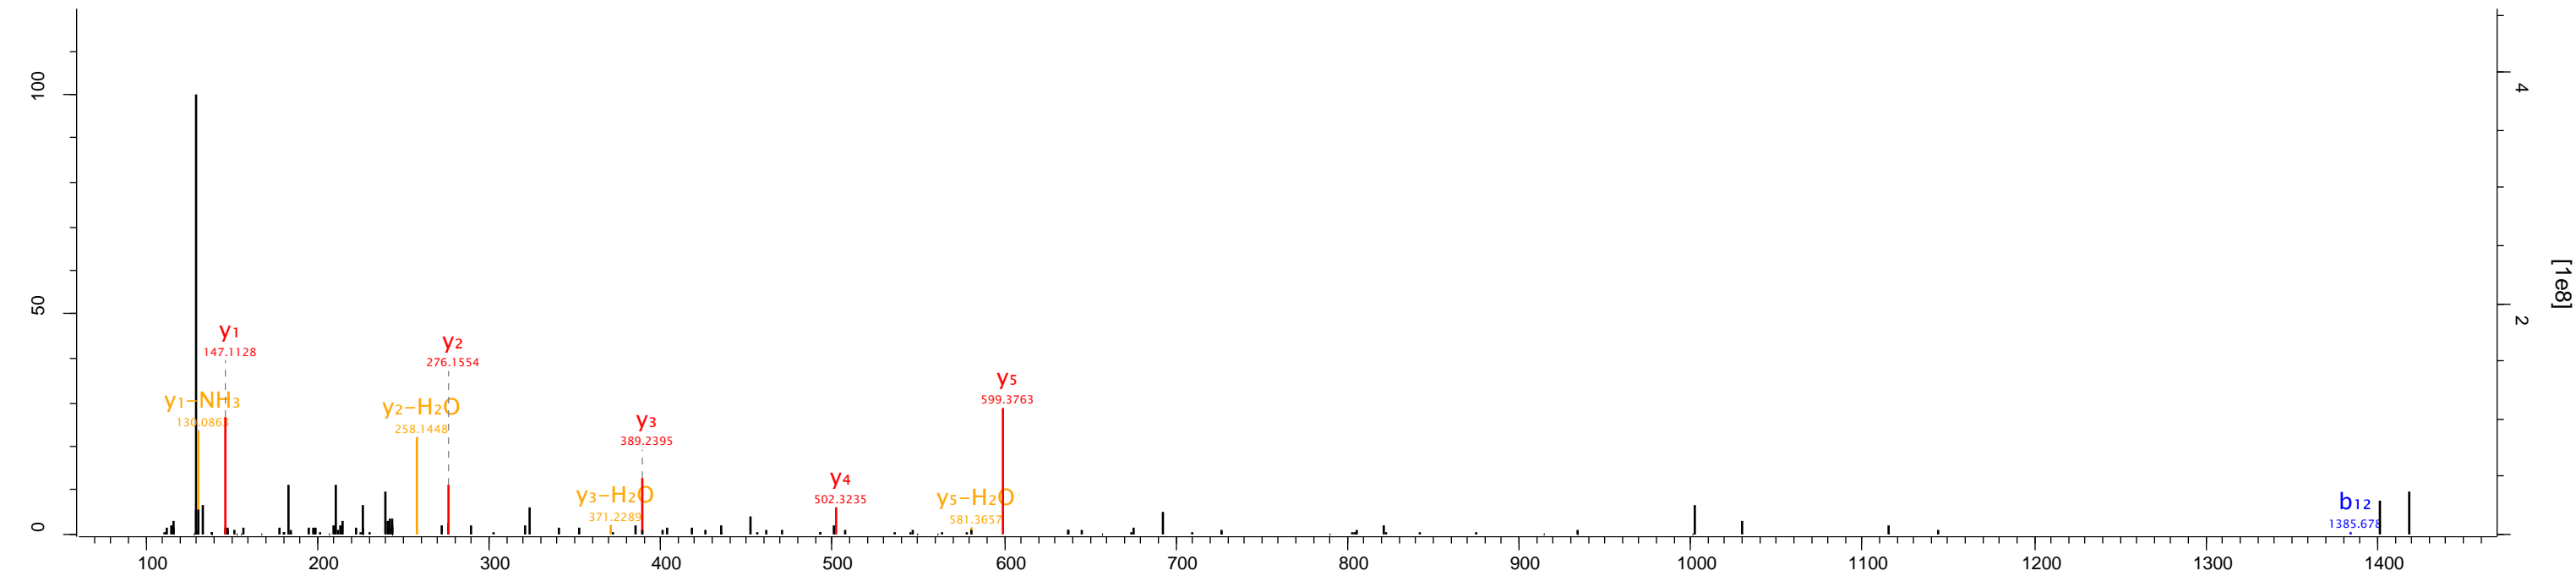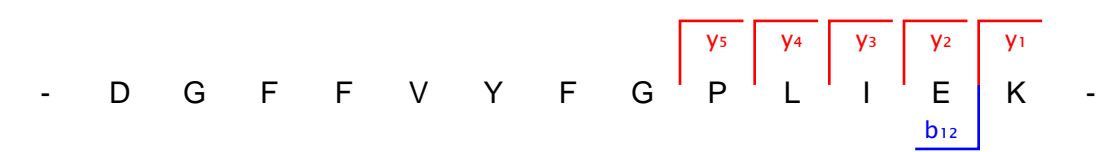

Raw file: 20140827\_EXQ00\_FaHo\_SA\_GFP\_03  
 Scan: 2691 Method: FTMS; HCD Score: 95.36 m/z: 320.5 Gene names: QCR8

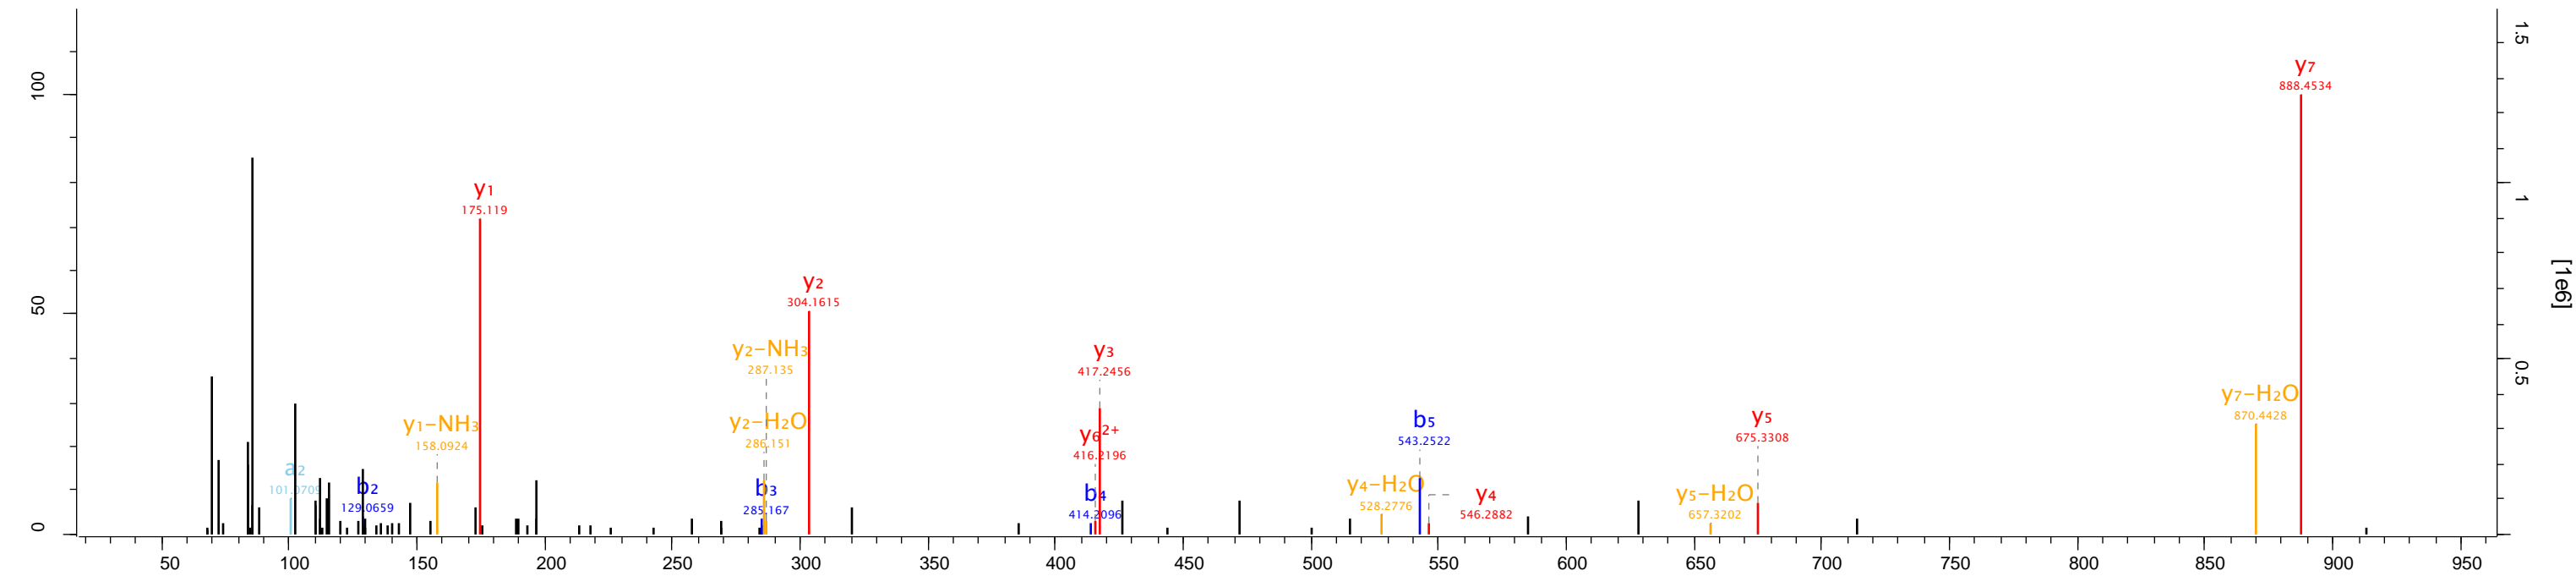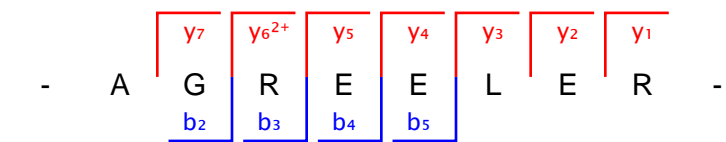

Raw file: 20140827\_EXQ00\_FaHo\_SA\_GFP\_03  
 Scan: 4324 Method: FTMS; HCD Score: 104.05 m/z: 409.23 Gene names: RPL21A

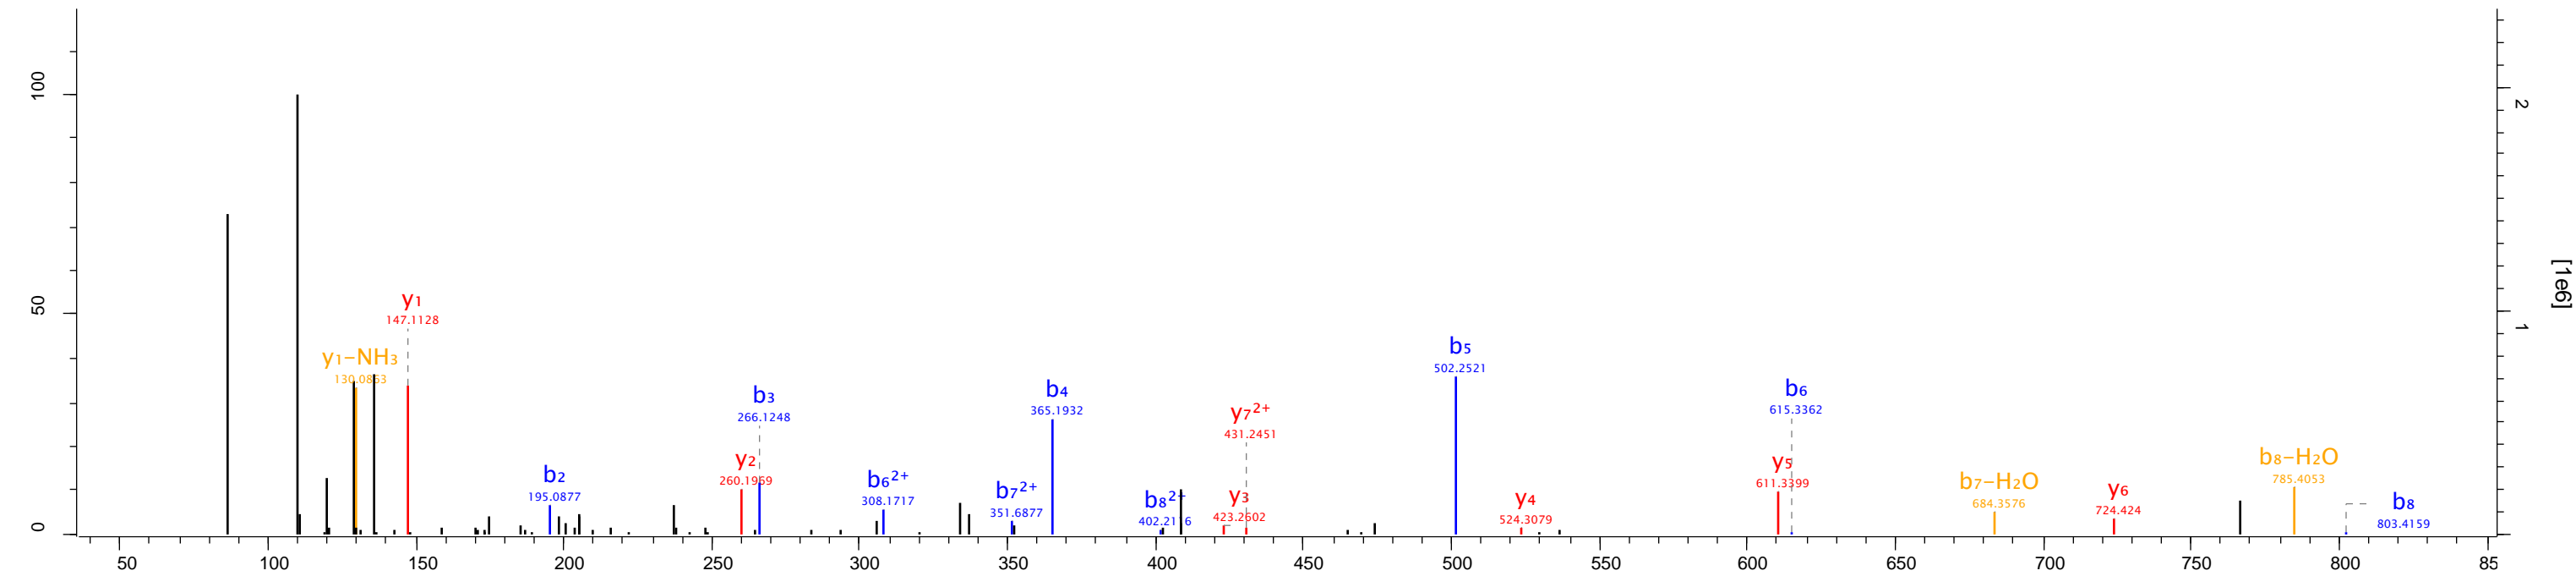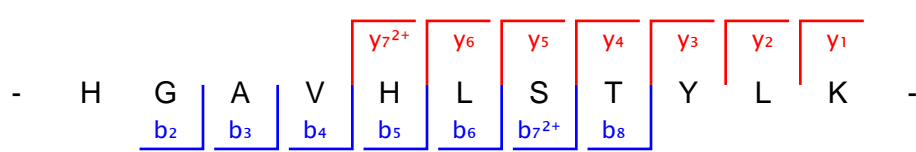



Raw file: 20140827\_EXQ00\_FaHo\_SA\_GFP\_03  
 Scan: 7702 Method: FTMS; HCD Score: 147.67 m/z: 862.44 Gene names: RPS14B;RPS14A

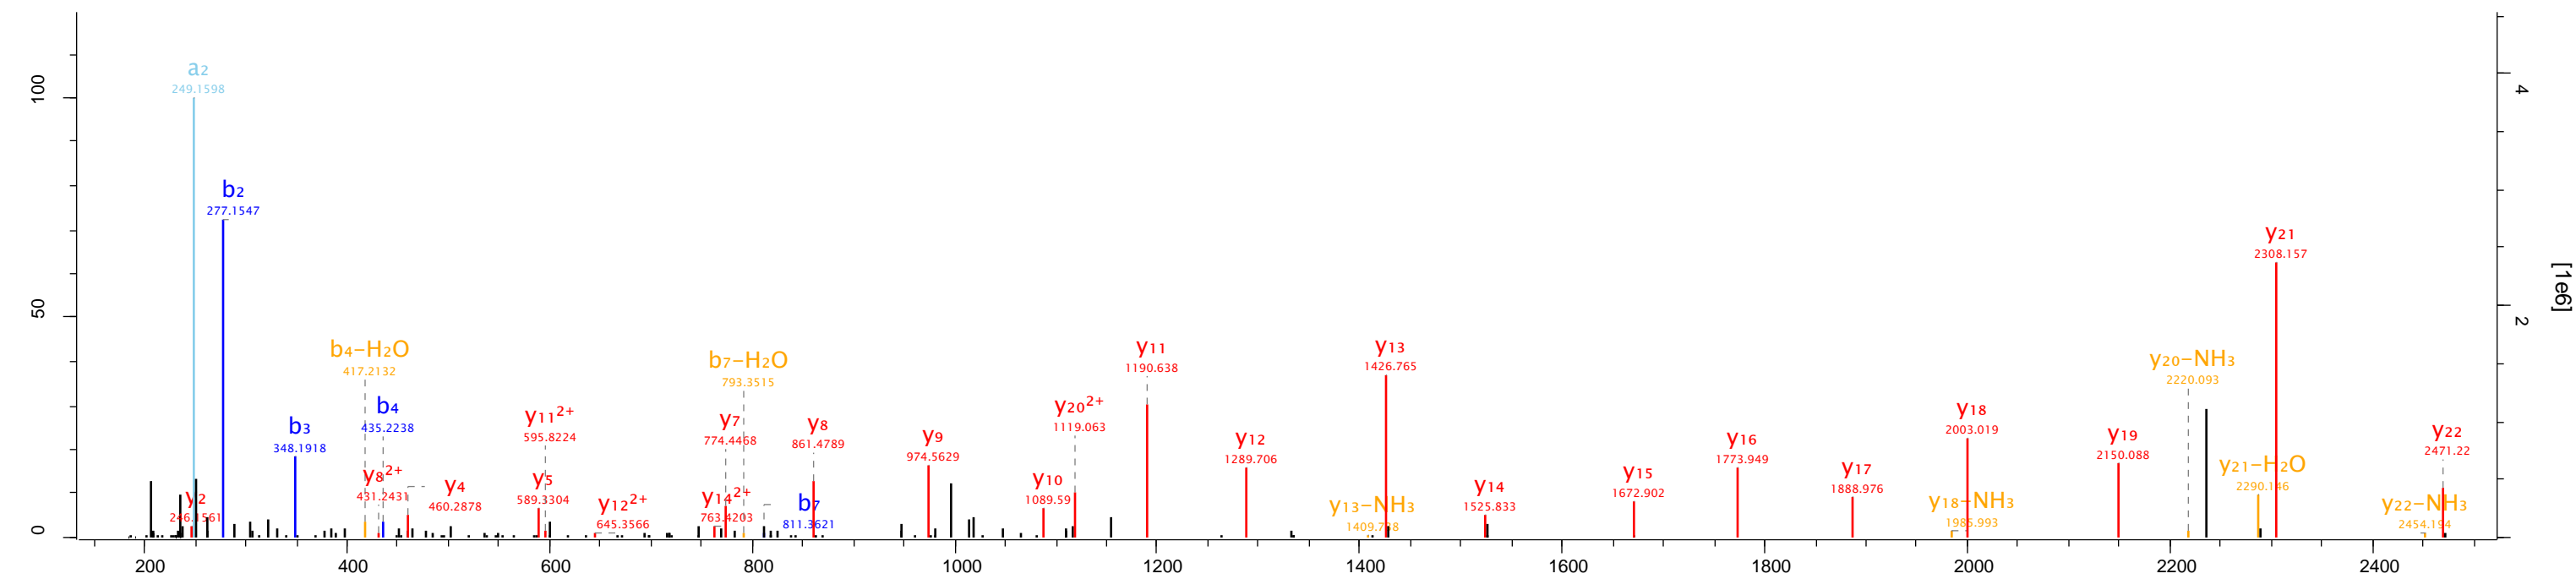

Protein sequence: I Y A S F N D T F V H V T D L S G K E T I A R -

Fragmentation sites are indicated by brackets below the sequence:

- b2: Y
- b3: A
- b4: S
- b7: D
- y2: I
- y4: T
- y5: K
- y7: G
- y8: S
- y9: L
- y10: D
- y11: T
- y12: V
- y13: H
- y14: V
- y15: F
- y16: T
- y17: D
- y18: N
- y19: F
- y20<sup>2+</sup>: S
- y21: A
- y22: Y

Raw file: 20140827\_EXQ00\_FaHo\_SA\_HDA1\_02  
 Scan: 5650 Method: FTMS; HCD Score: 52.07 m/z: 613.82 Gene names: RPL7A;RPL7B

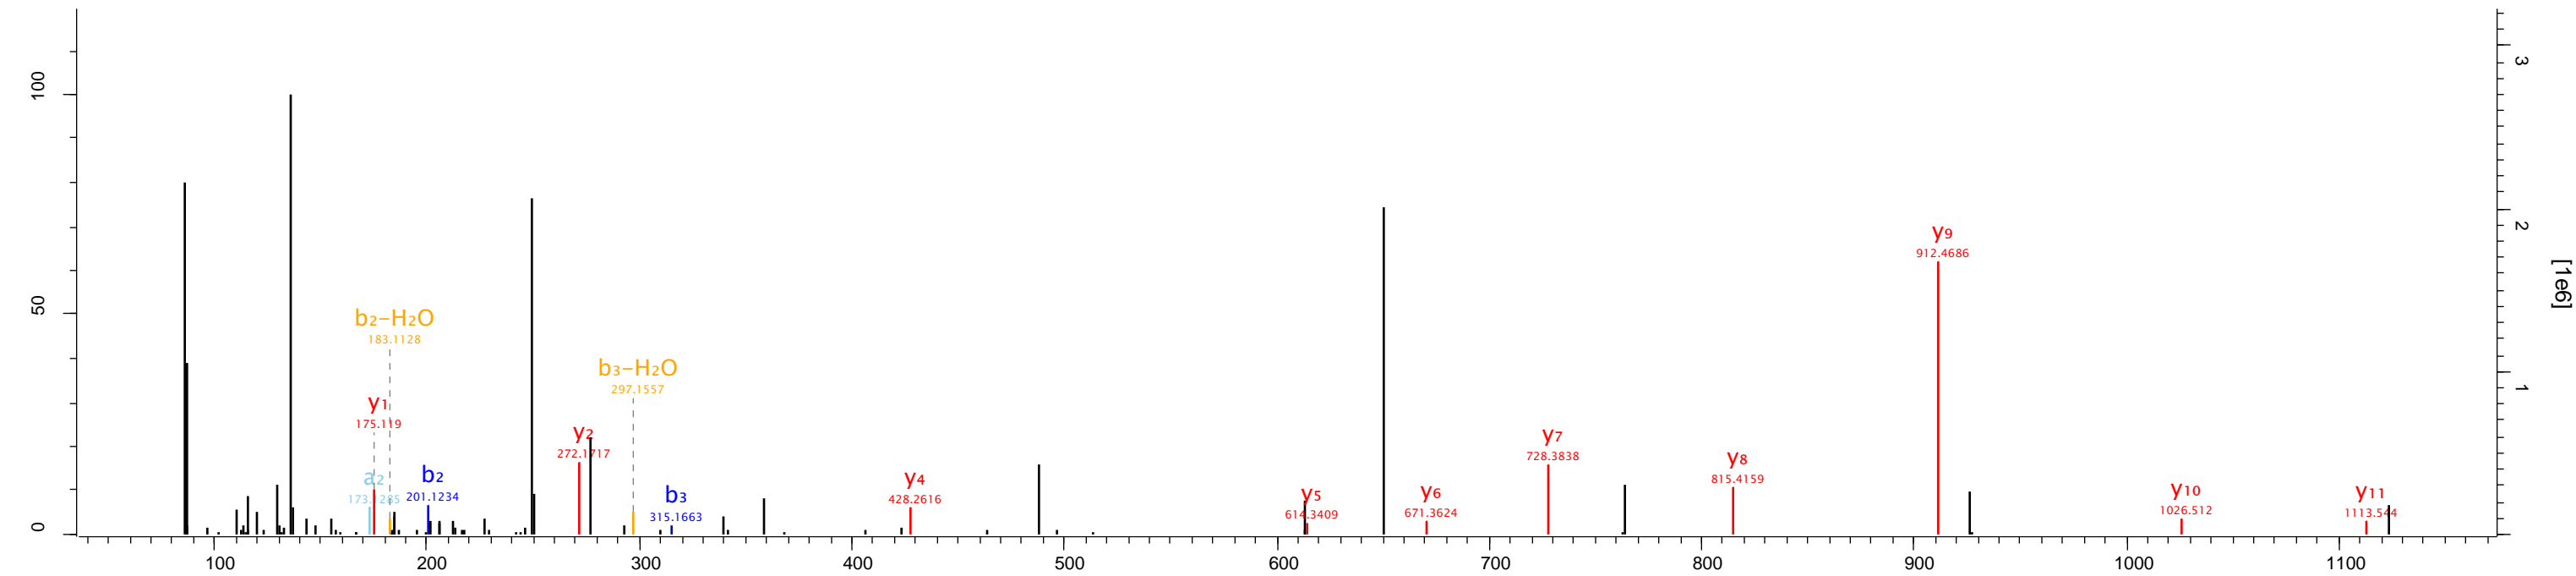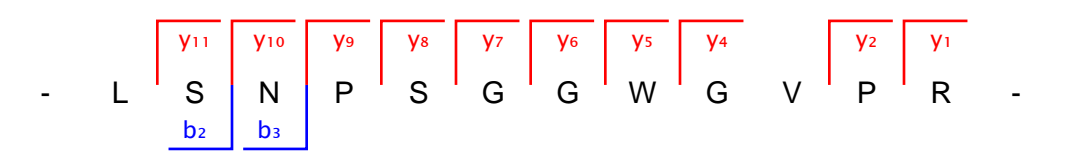

Raw file 20140827\_EXQ00\_FaHo\_SA\_HDA1\_02 Scan 5895 Method FTMS; HCD Score 95.53 m/z 457.26 Gene names VTC1

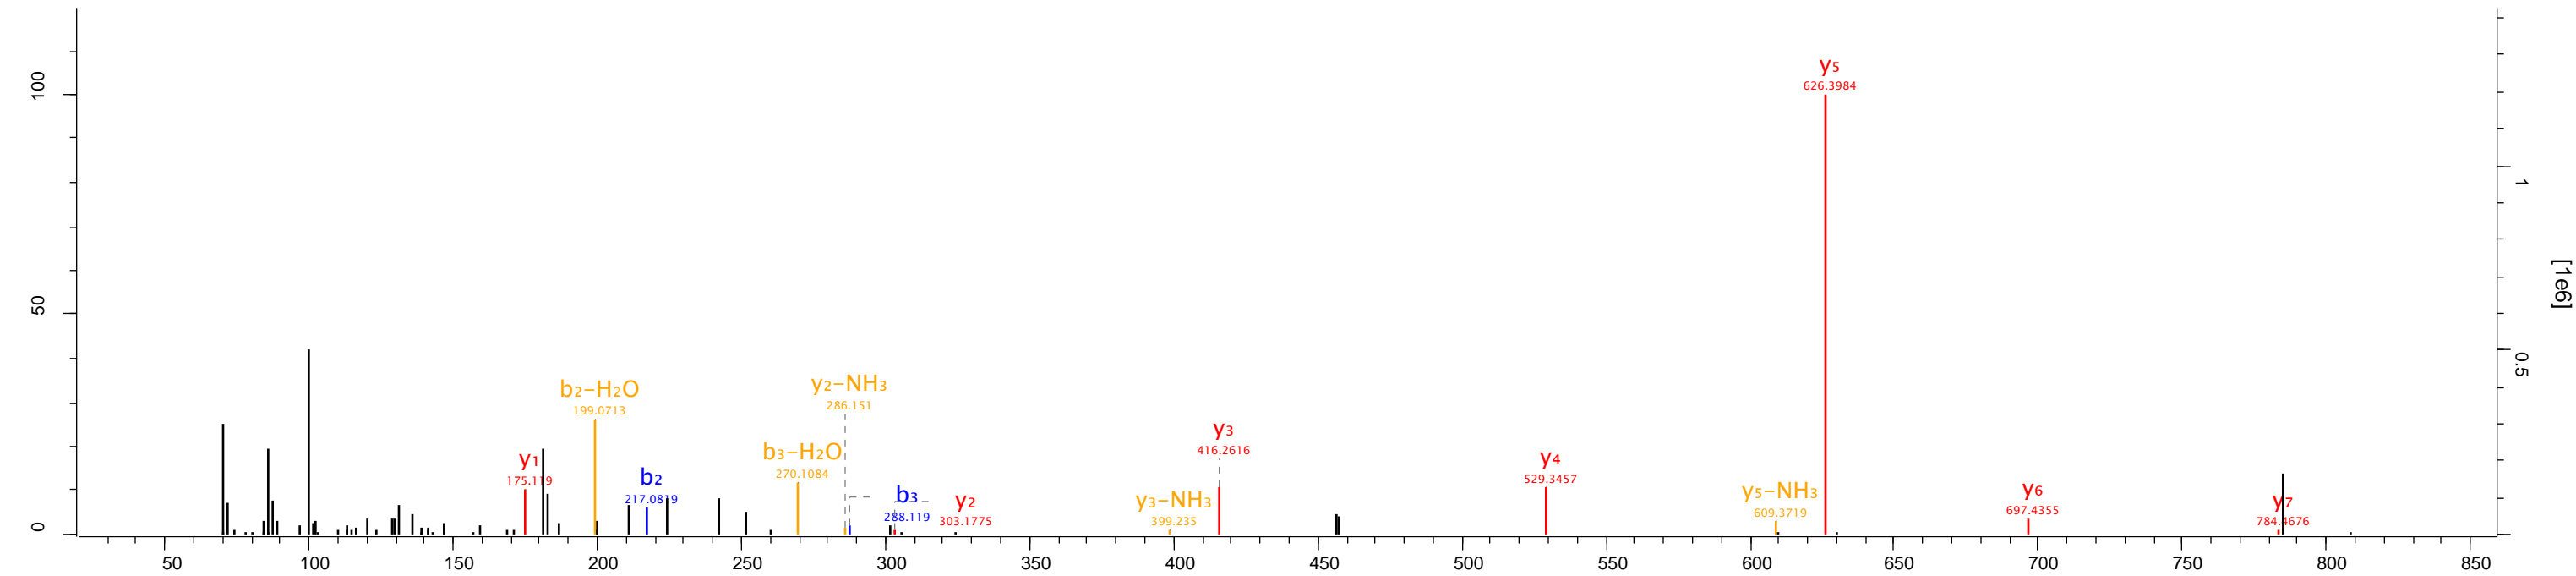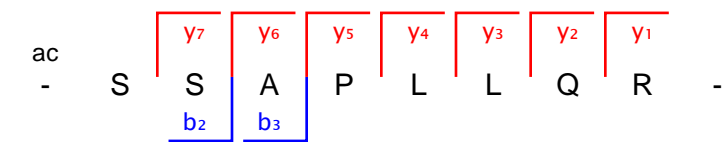

Raw file  
20140827\_EXQ00\_FaHo\_SA\_HDA1\_02

Scan 6389 Method FTMS; HCD Score 79.69 m/z 602.8 Gene names RPS14B;RPS14A

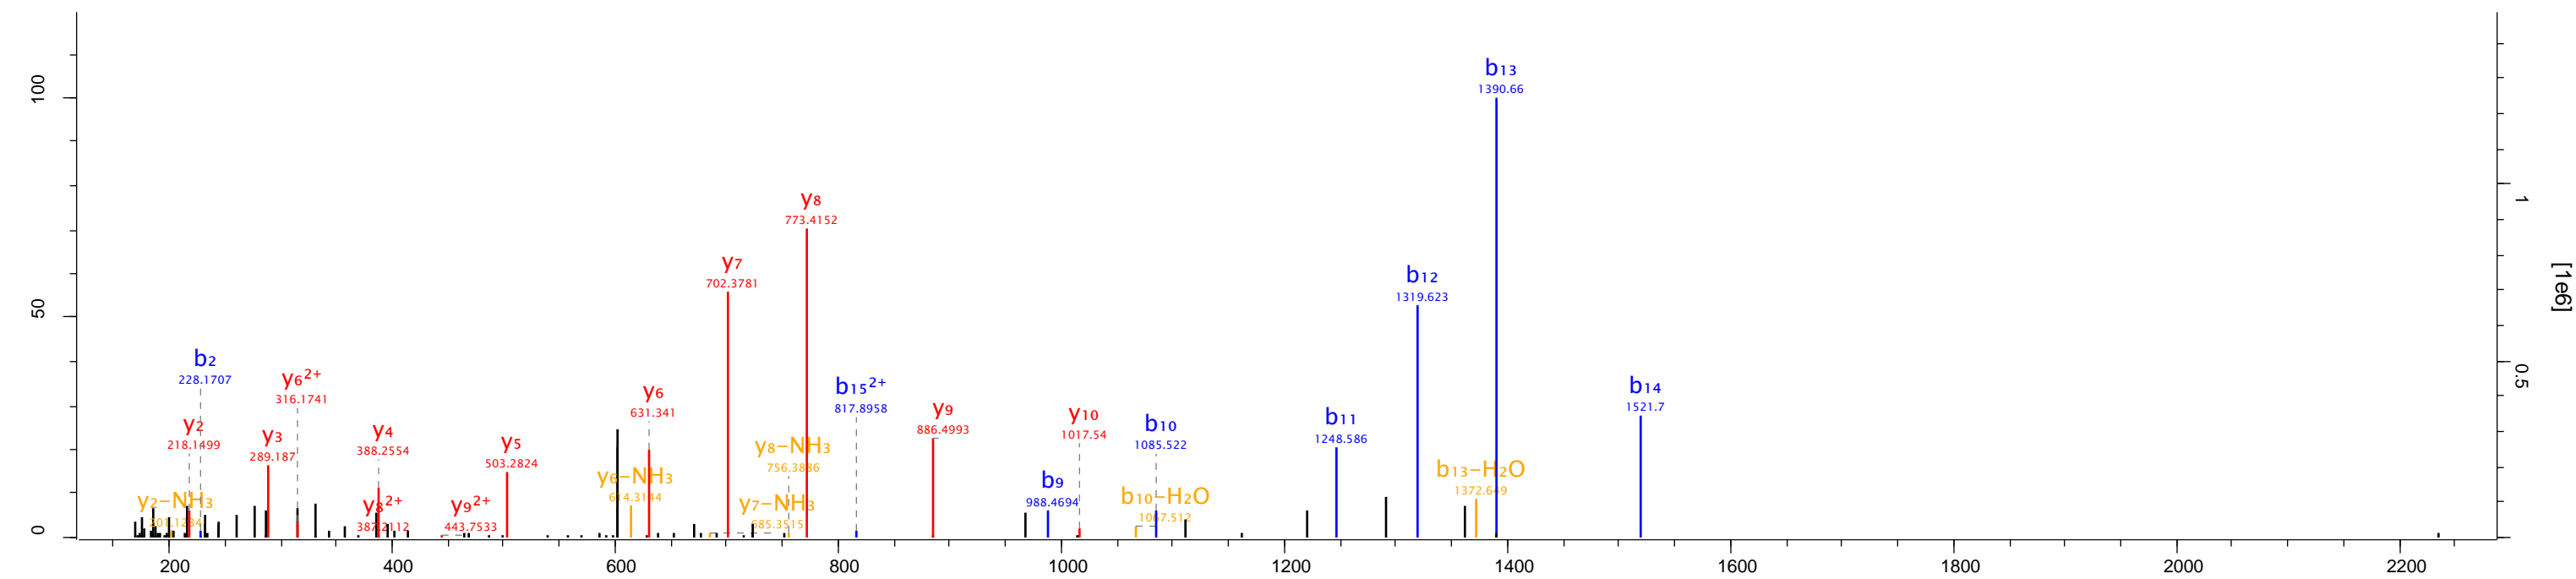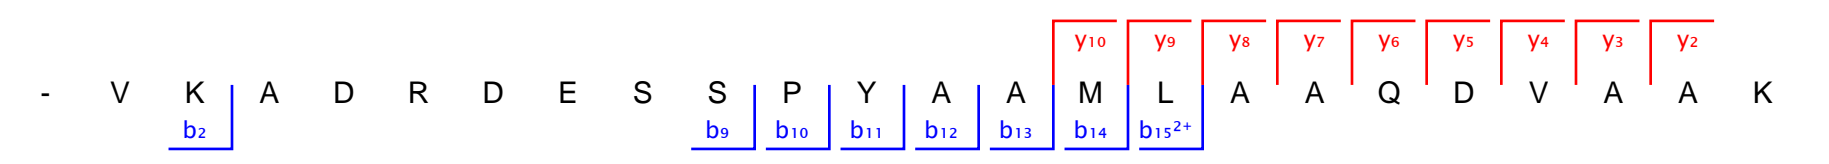

Raw file 20140827\_EXQ00\_FaHo\_SA\_HDA1\_02 Scan 8211 Method FTMS; HCD Score 141.13 m/z 672.34 Gene names RPS14B;RPS14A

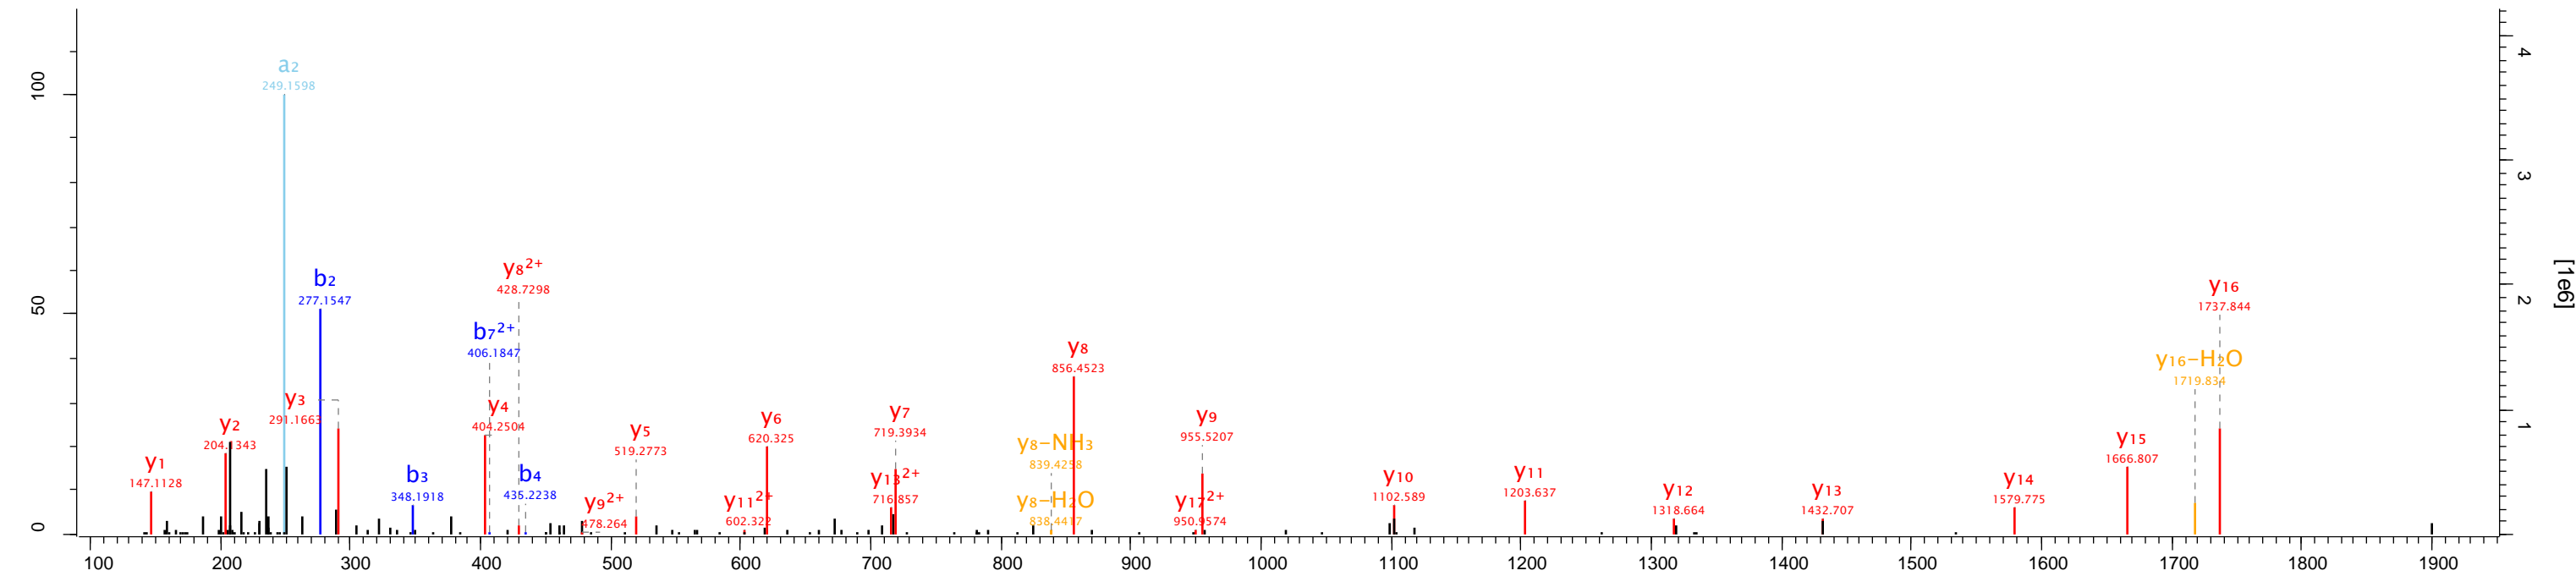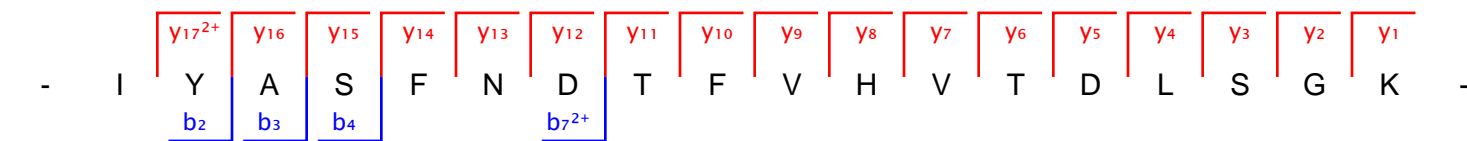

Raw file 20140827\_EXQ00\_FaHo\_SA\_HDA1\_03 Scan 7211 Method FTMS; HCD Score 217.48 m/z 726.39 Gene names RPL9A;RPL9B

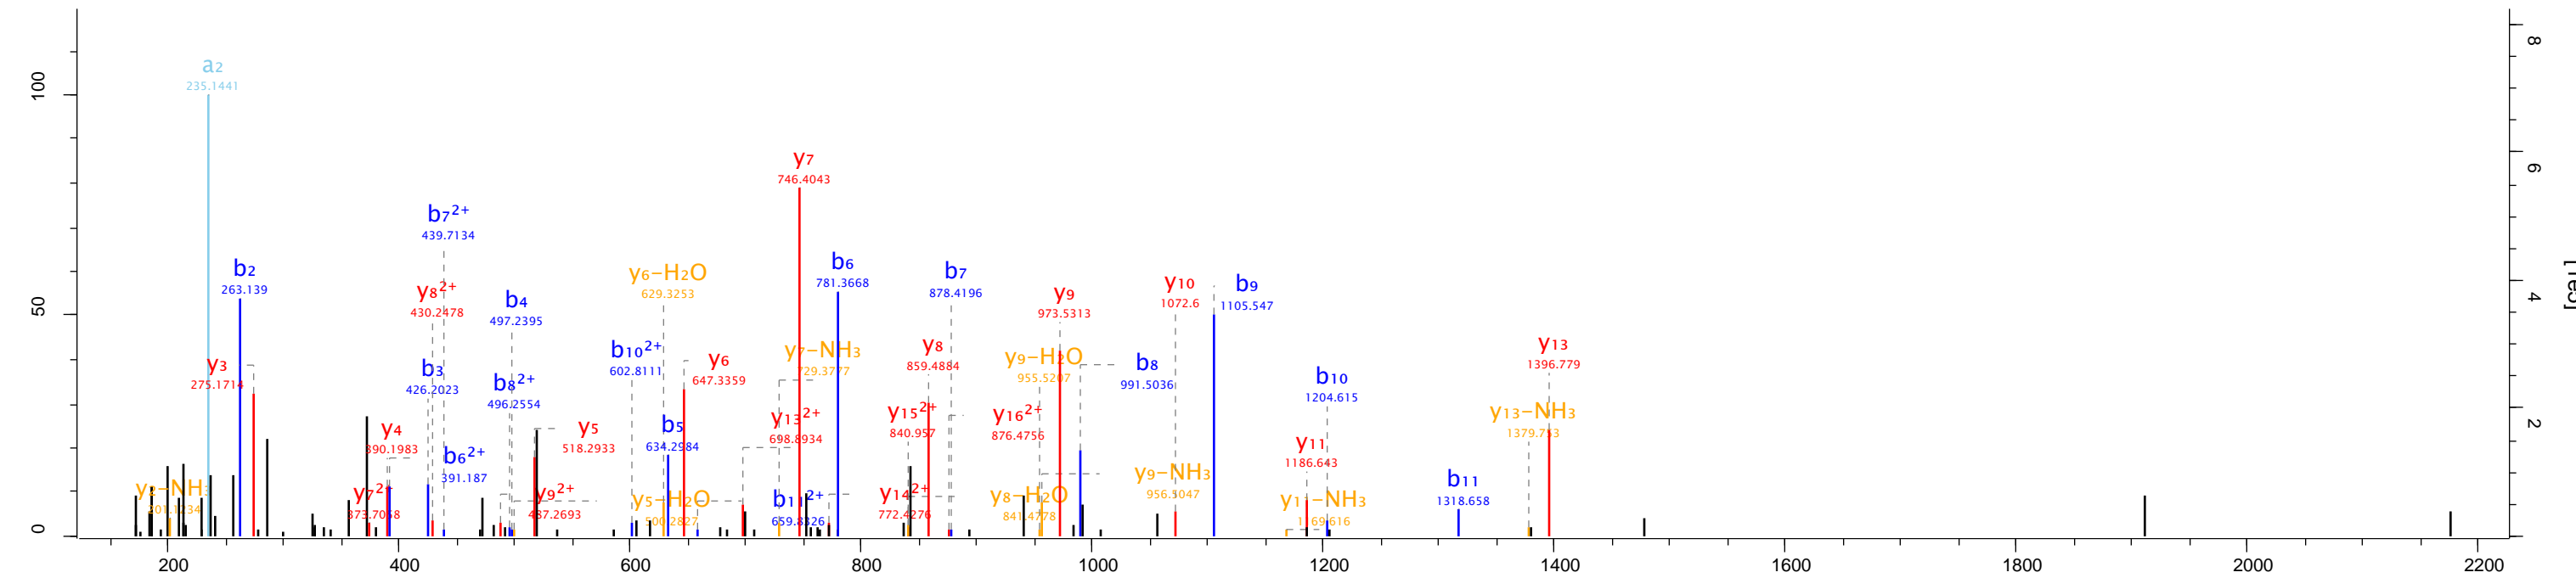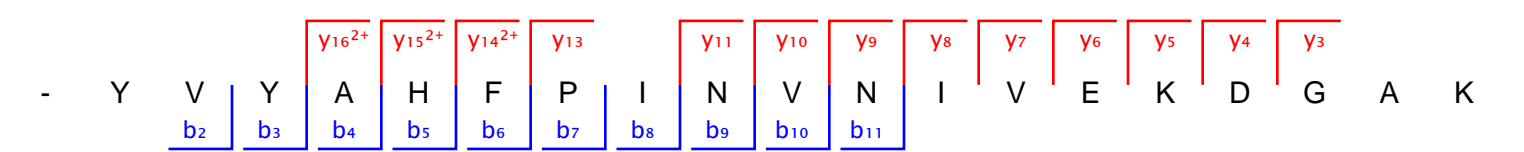

Raw file: 20140827\_EXQ00\_FaHo\_SA\_HDA2\_01  
 Scan: 3032 Method: FTMS; HCD Score: 158.79 m/z: 487.75 Gene names: RPL7A

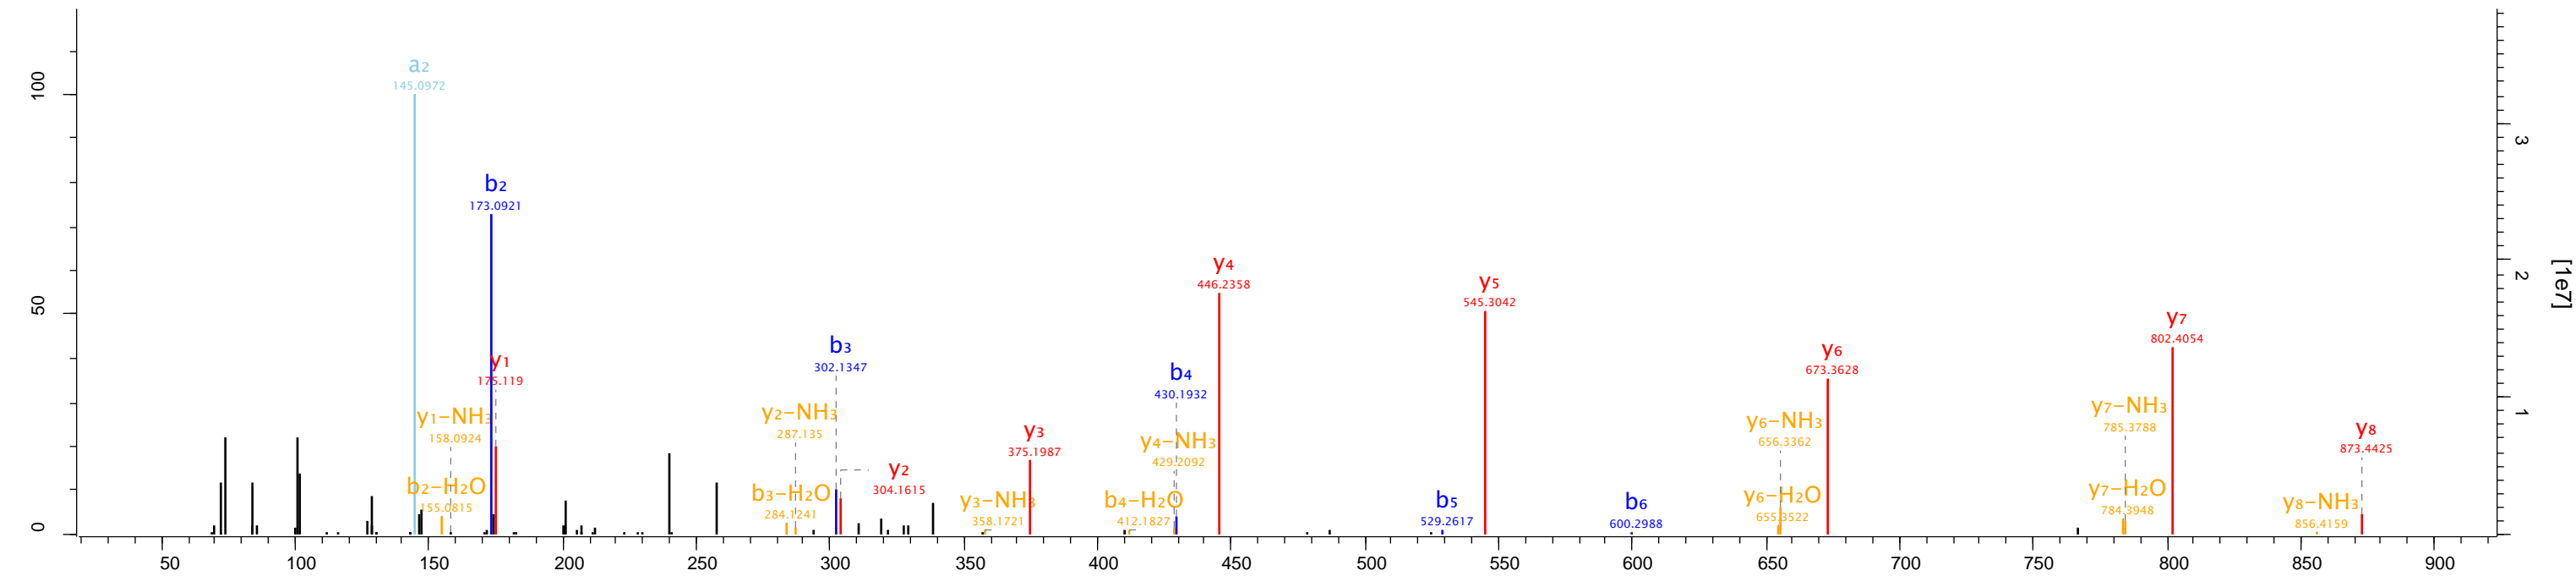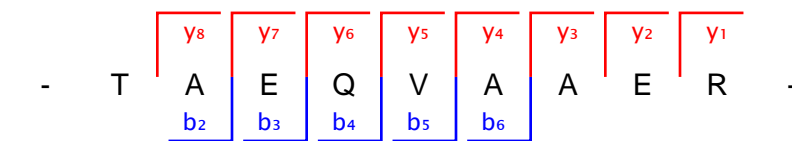

Raw file: 20140827\_EXQ00\_FaHo\_SA\_HDA2\_03  
 Scan: 4079 Method: FTMS; HCD Score: 81.02 m/z: 613.79 Gene names: CDC42

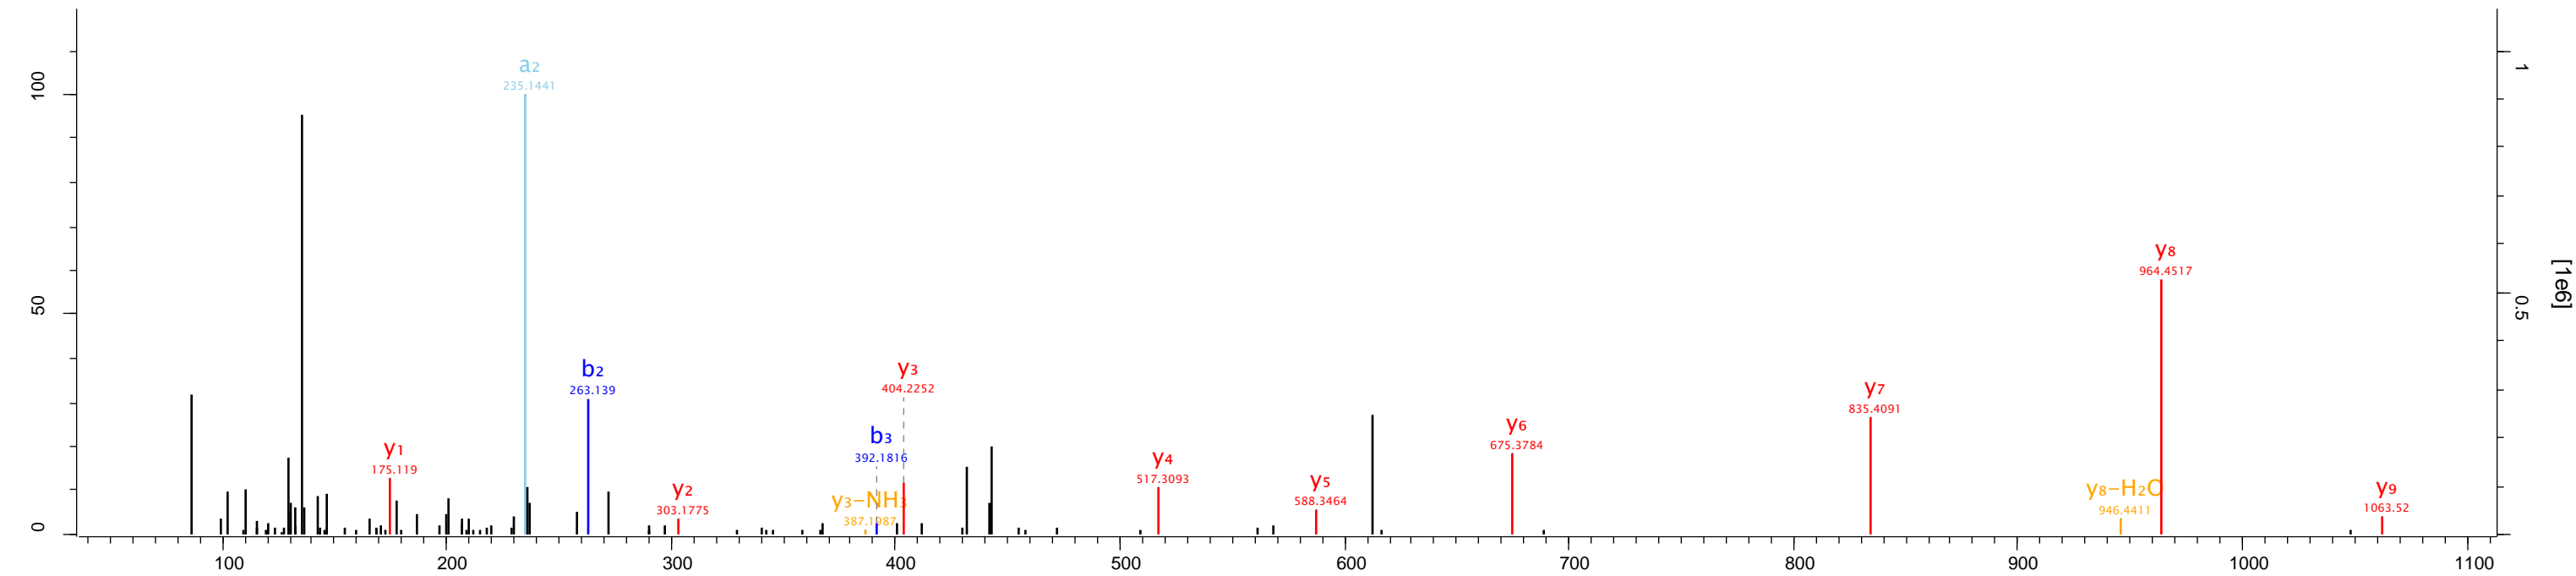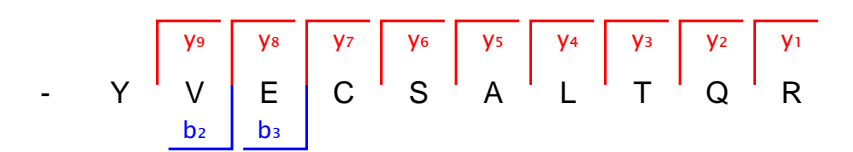



Raw file: 20140827\_EXQ00\_FaHo\_SA\_HDA2\_03  
 Scan: 7883 Method: FTMS; HCD Score: 61.34 m/z: 749.44 Gene names: CRM1

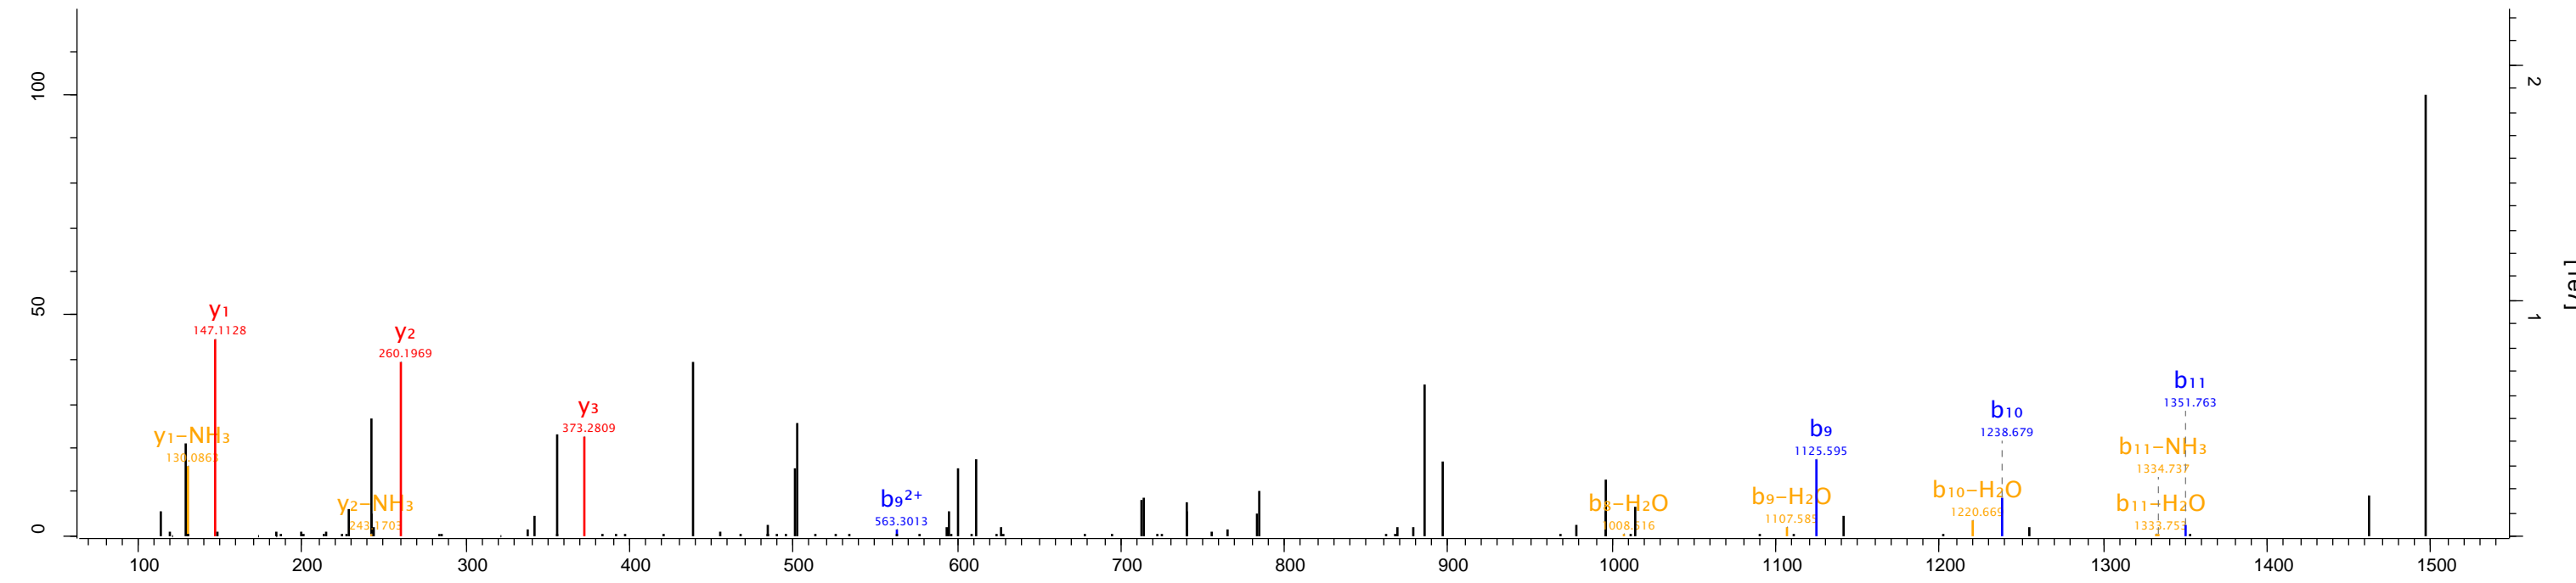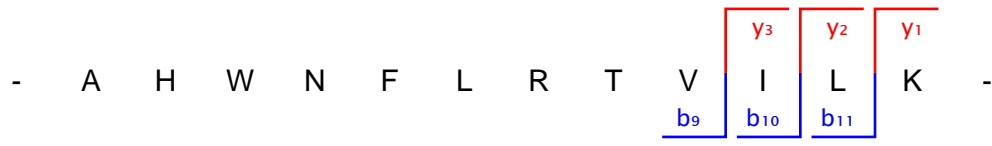

Raw file: 20140827\_EXQ00\_FaHo\_SA\_HDA3\_03  
 Scan: 5343 Method: FTMS; HCD Score: 50.09 m/z: 579.62 Gene names: YKT6

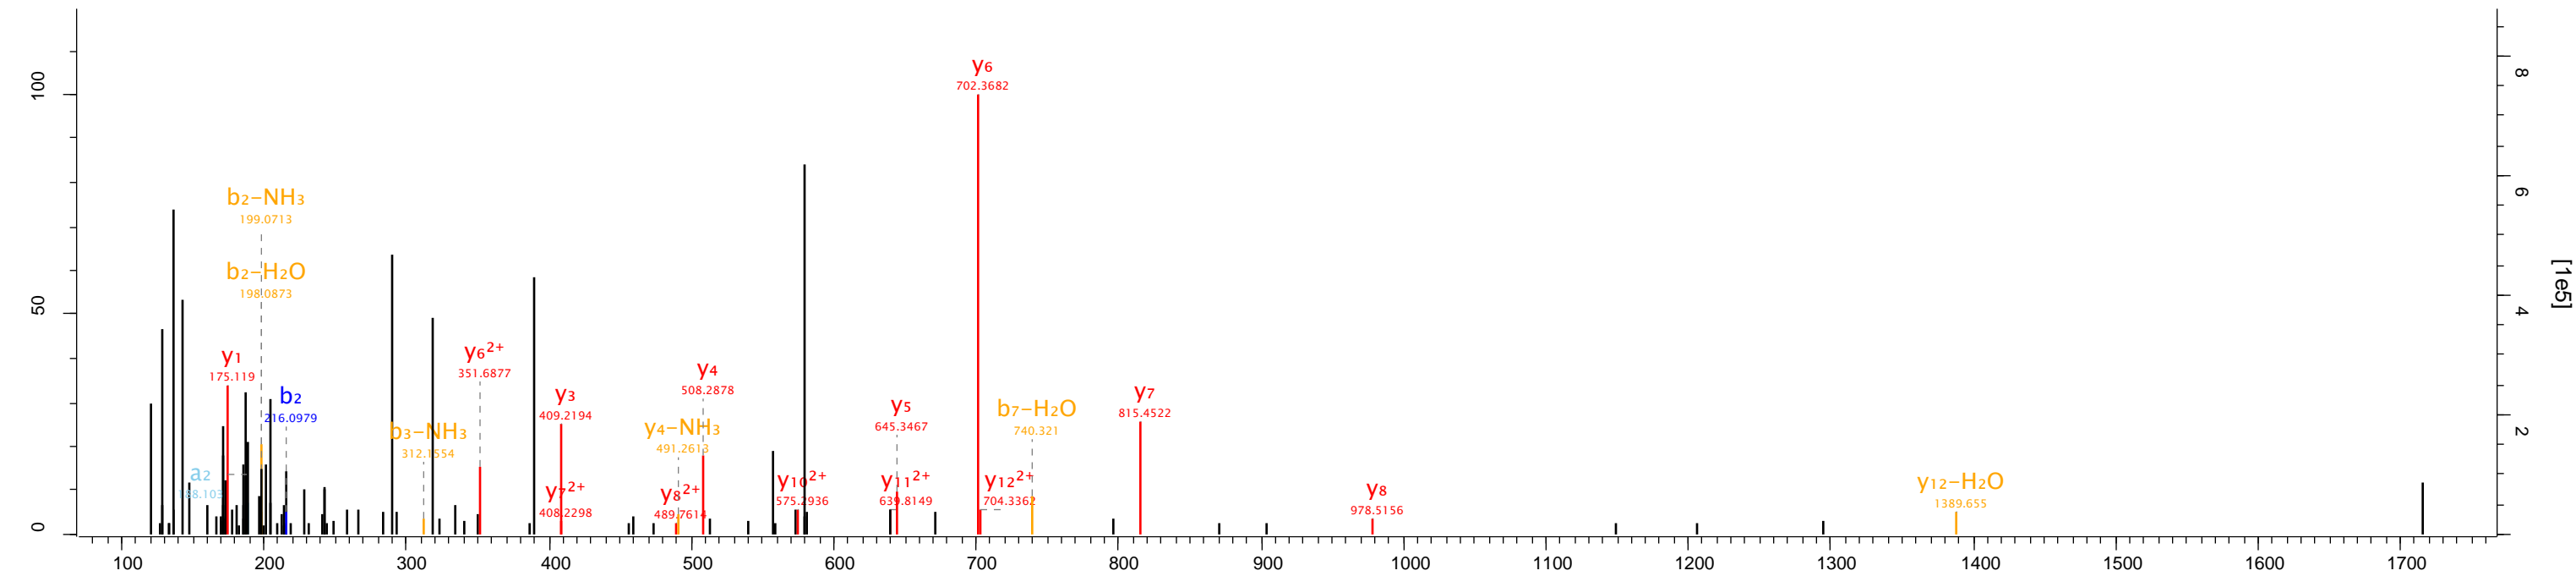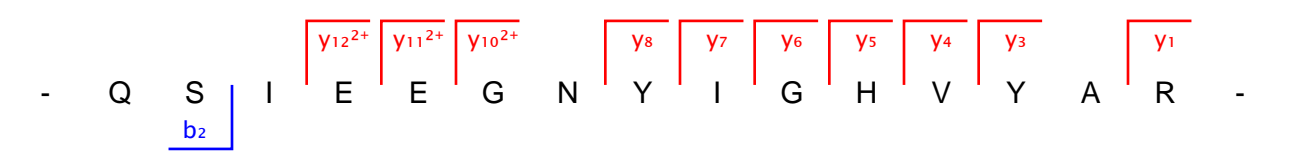

Raw file: 20140827\_EXQ00\_FaHo\_SA\_HDA3\_03  
 Scan: 6008 Method: FTMS; HCD Score: 85.16 m/z: 466.75 Gene names: TRX2;TRX1

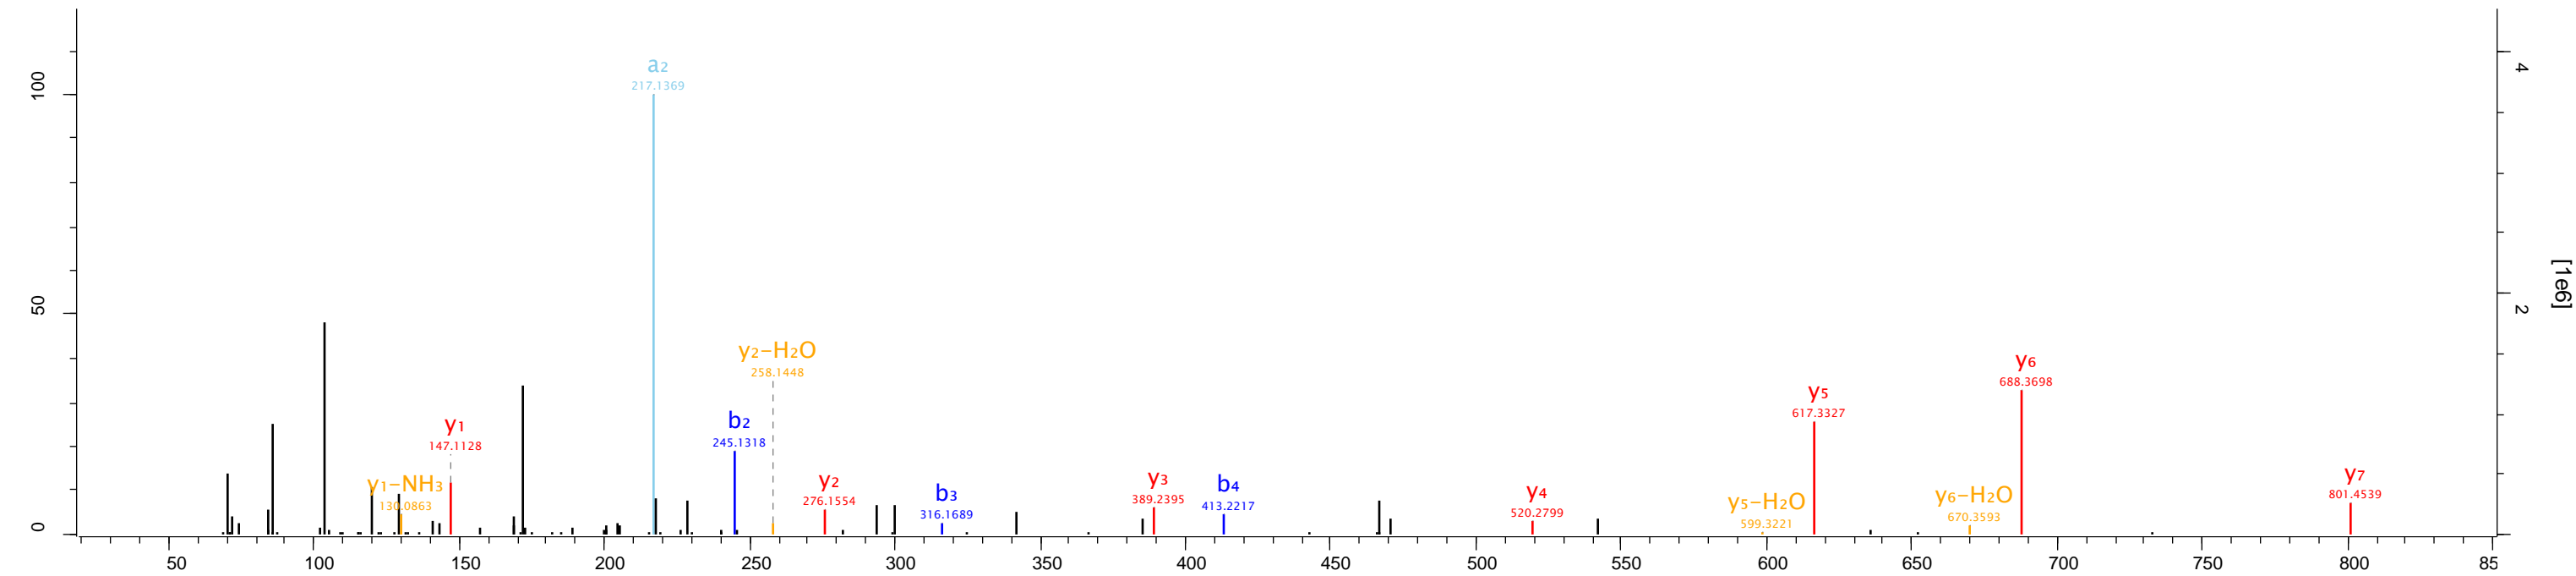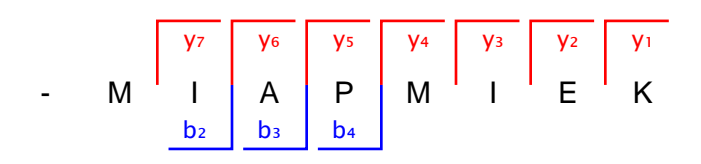

Raw file 20140827\_EXQ00\_FaHo\_SA\_HDA3\_03 Scan 7547 Method FTMS; HCD Score 68.54 m/z 594.35 Gene names ARG4

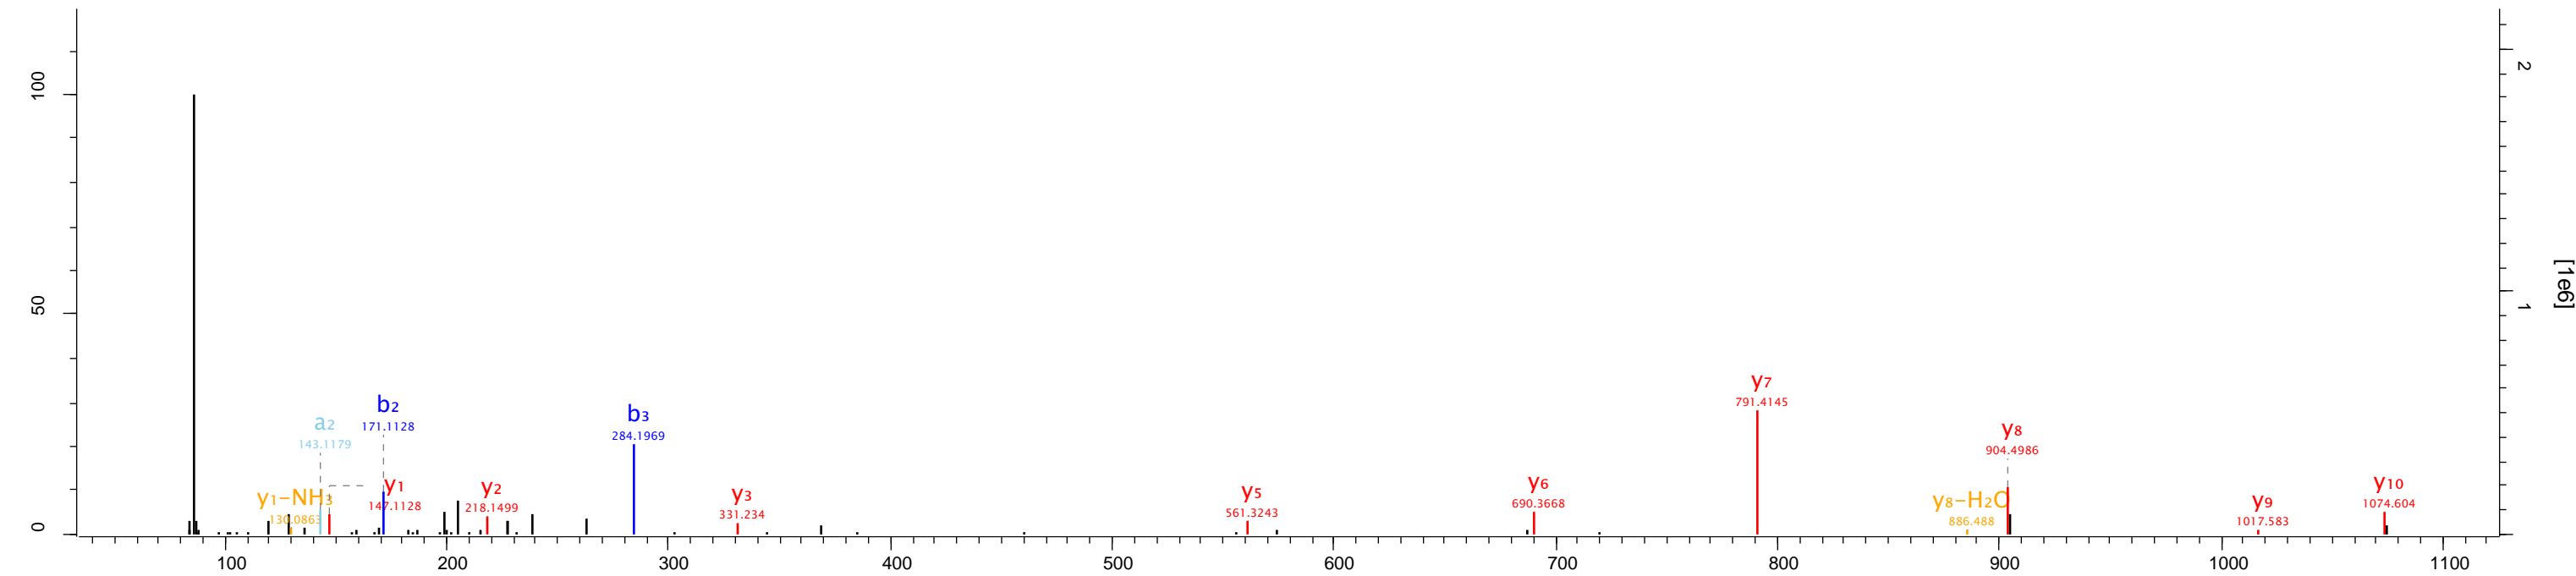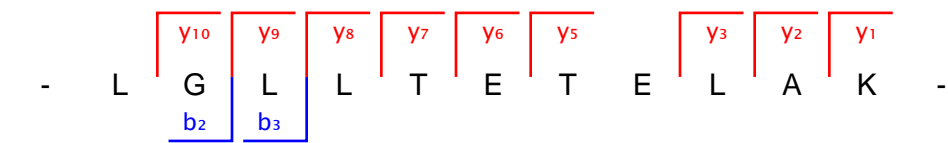

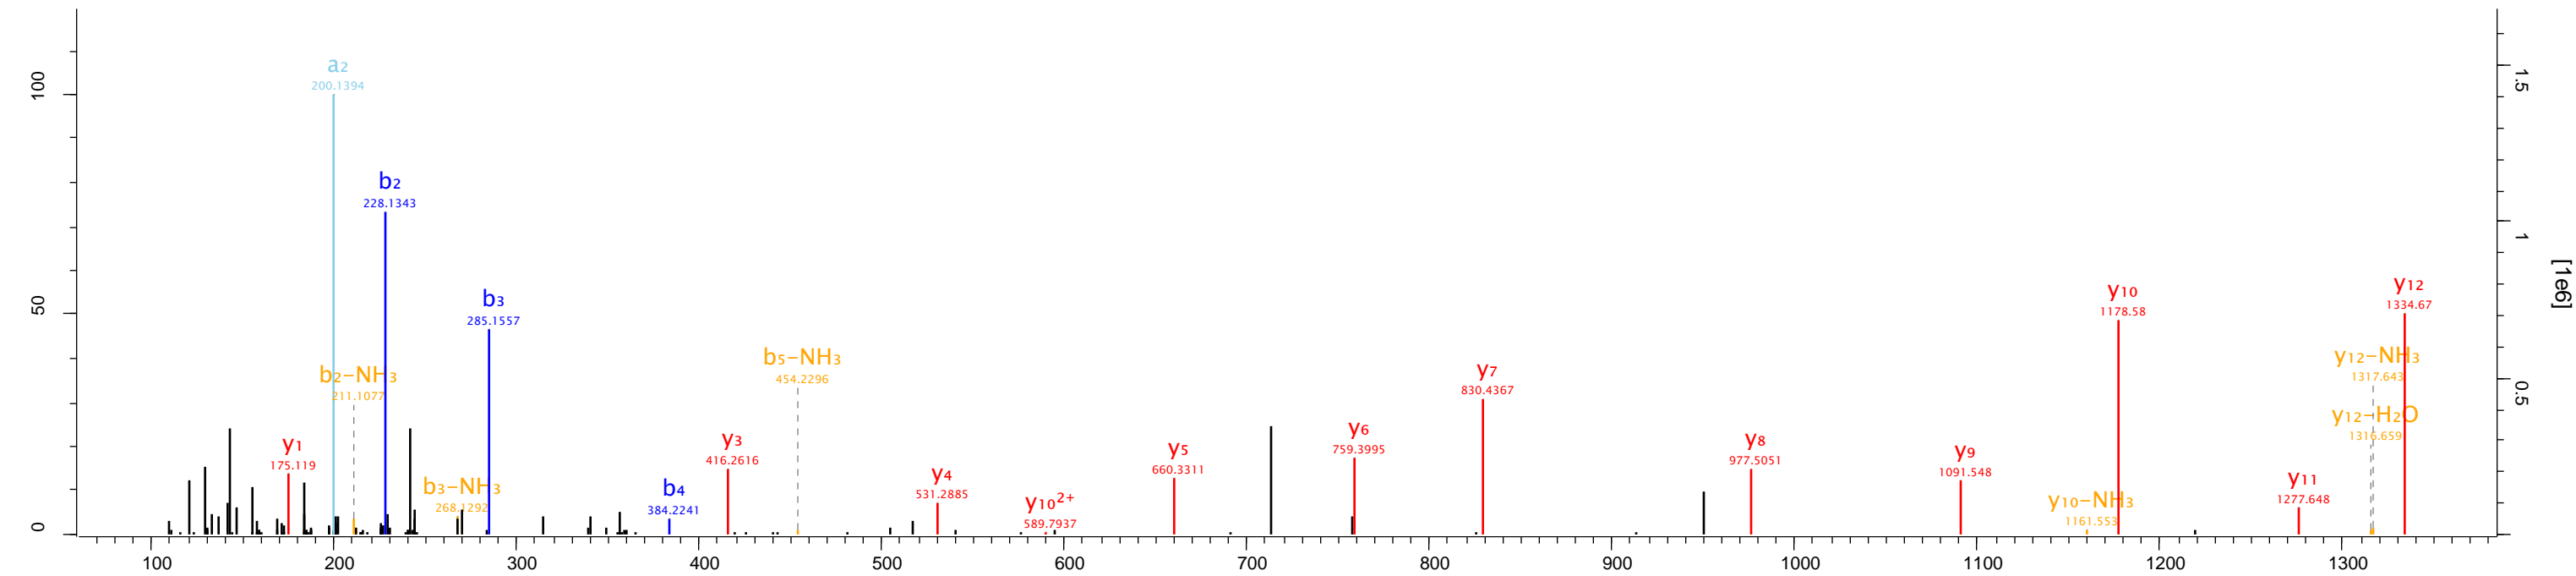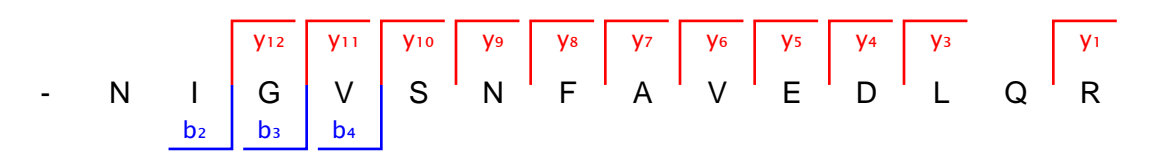

Raw file 20140827\_EXQ00\_FaHo\_SA\_HIF1\_01 Scan 5817 Method FTMS; HCD Score 123.67 m/z 689.85 Gene names HNT1

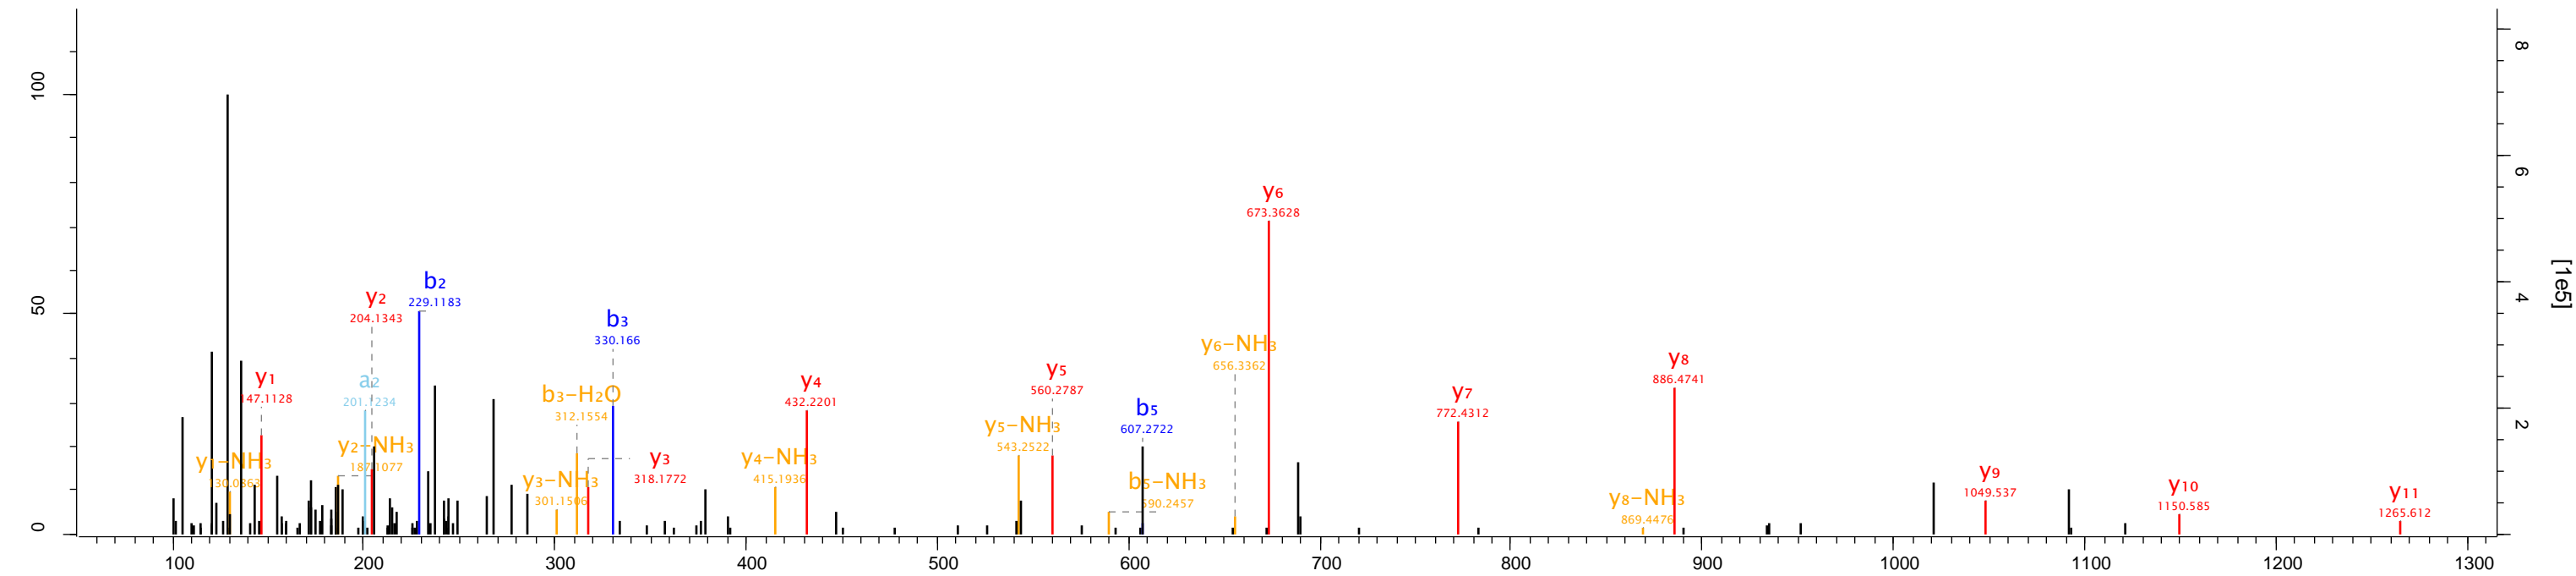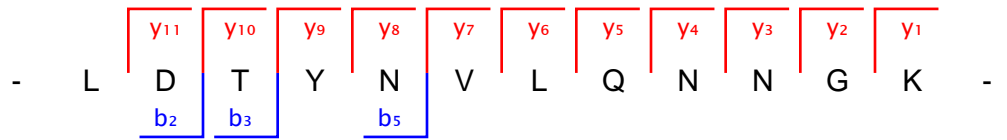

Raw file 20140827\_EXQ00\_FaHo\_SA\_HIF1\_01 Scan 6493 Method FTMS; HCD Score 59.67 m/z 800.42 Gene names SAM4

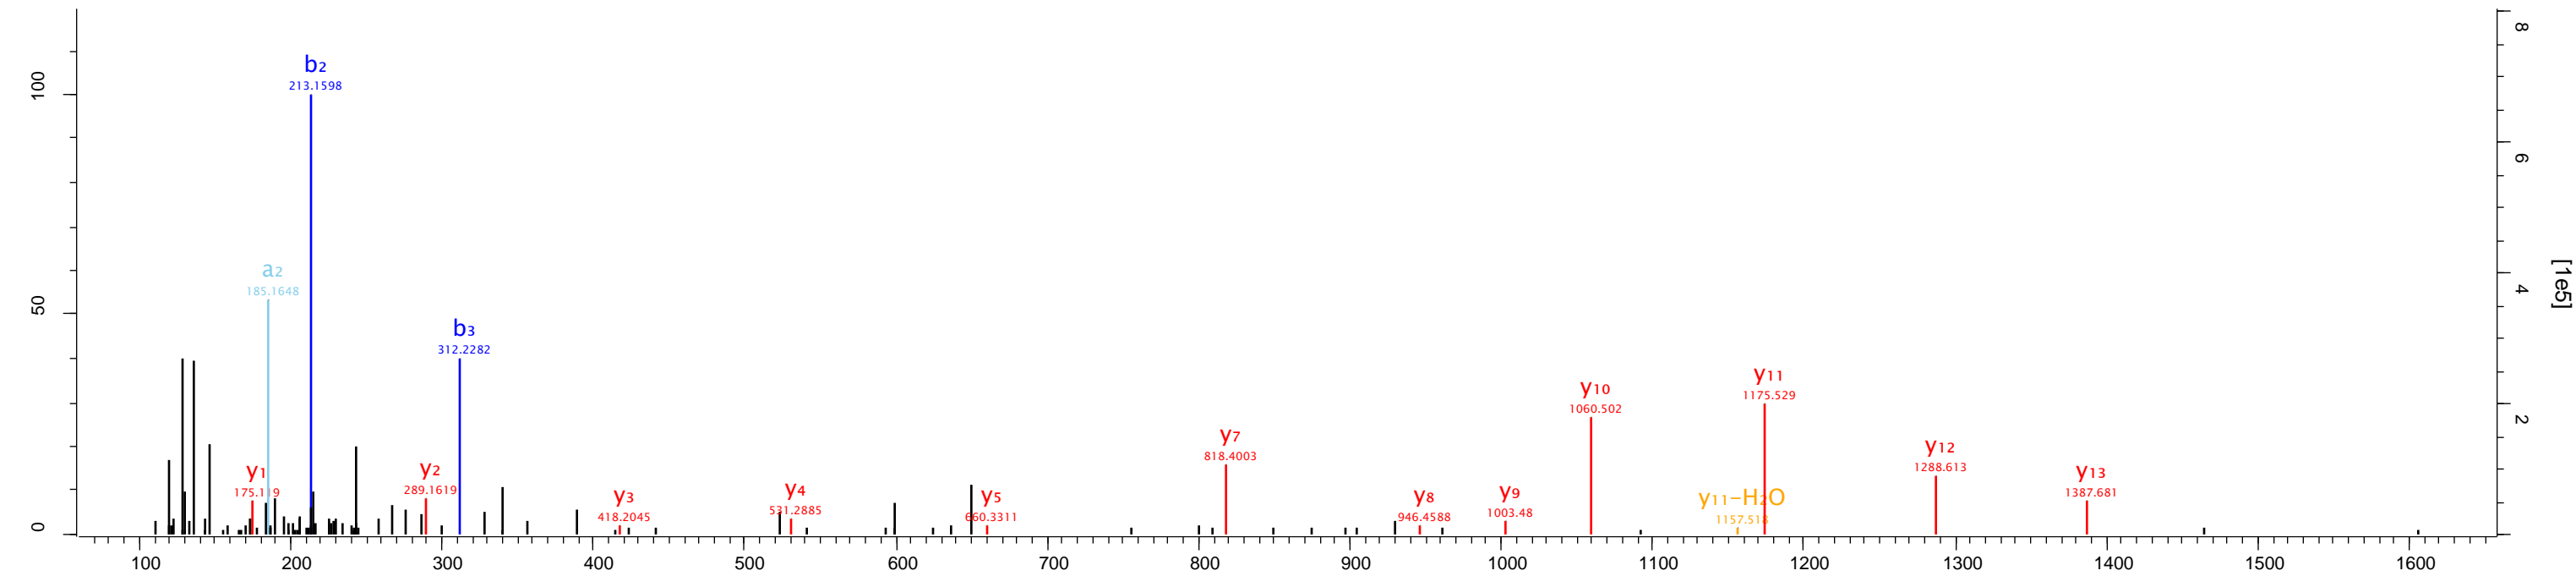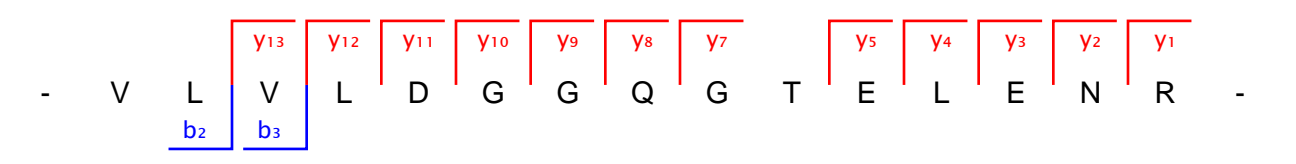

Raw file: 20140827\_EXQ00\_FaHo\_SA\_HIF1\_01  
 Scan: 7248 Method: FTMS; HCD Score: 97.73 m/z: 537.31 Gene names: ARF1;ARF2

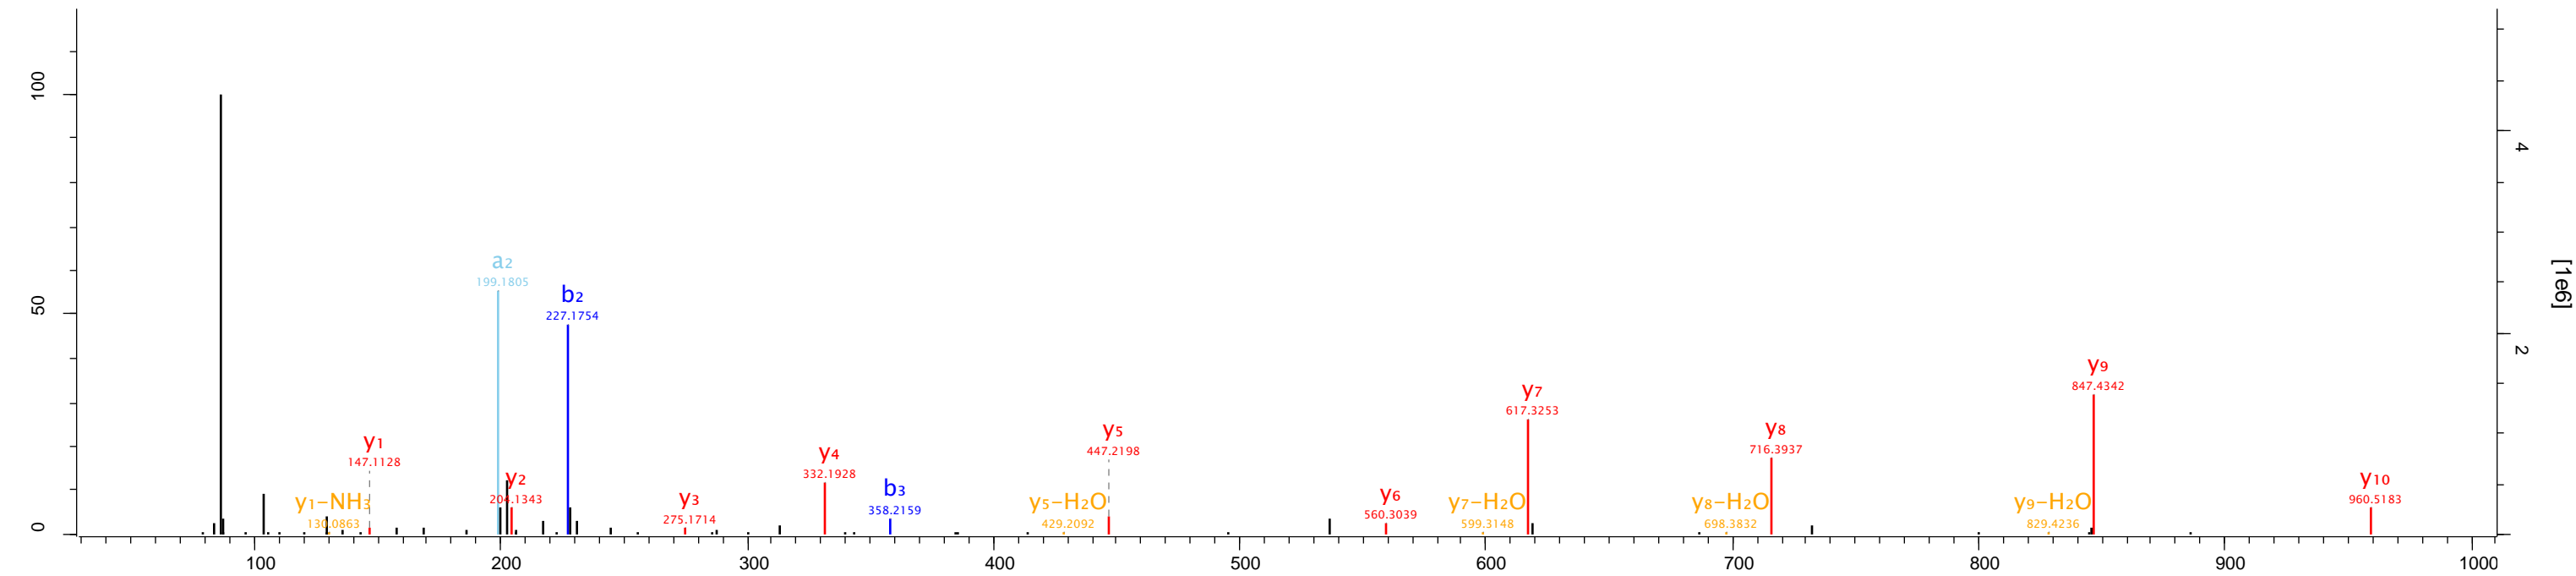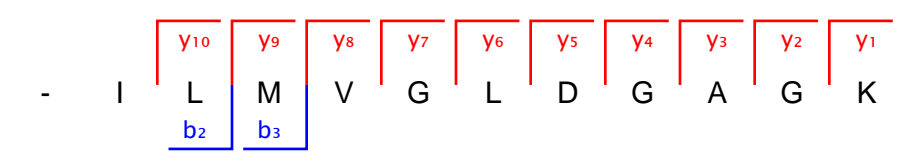



Raw file: 20140827\_EXQ00\_FaHo\_SA\_HIF1\_02  
 Scan: 4854 Method: FTMS; HCD Score: 133.23 m/z: 490.26 Gene names: ACB1

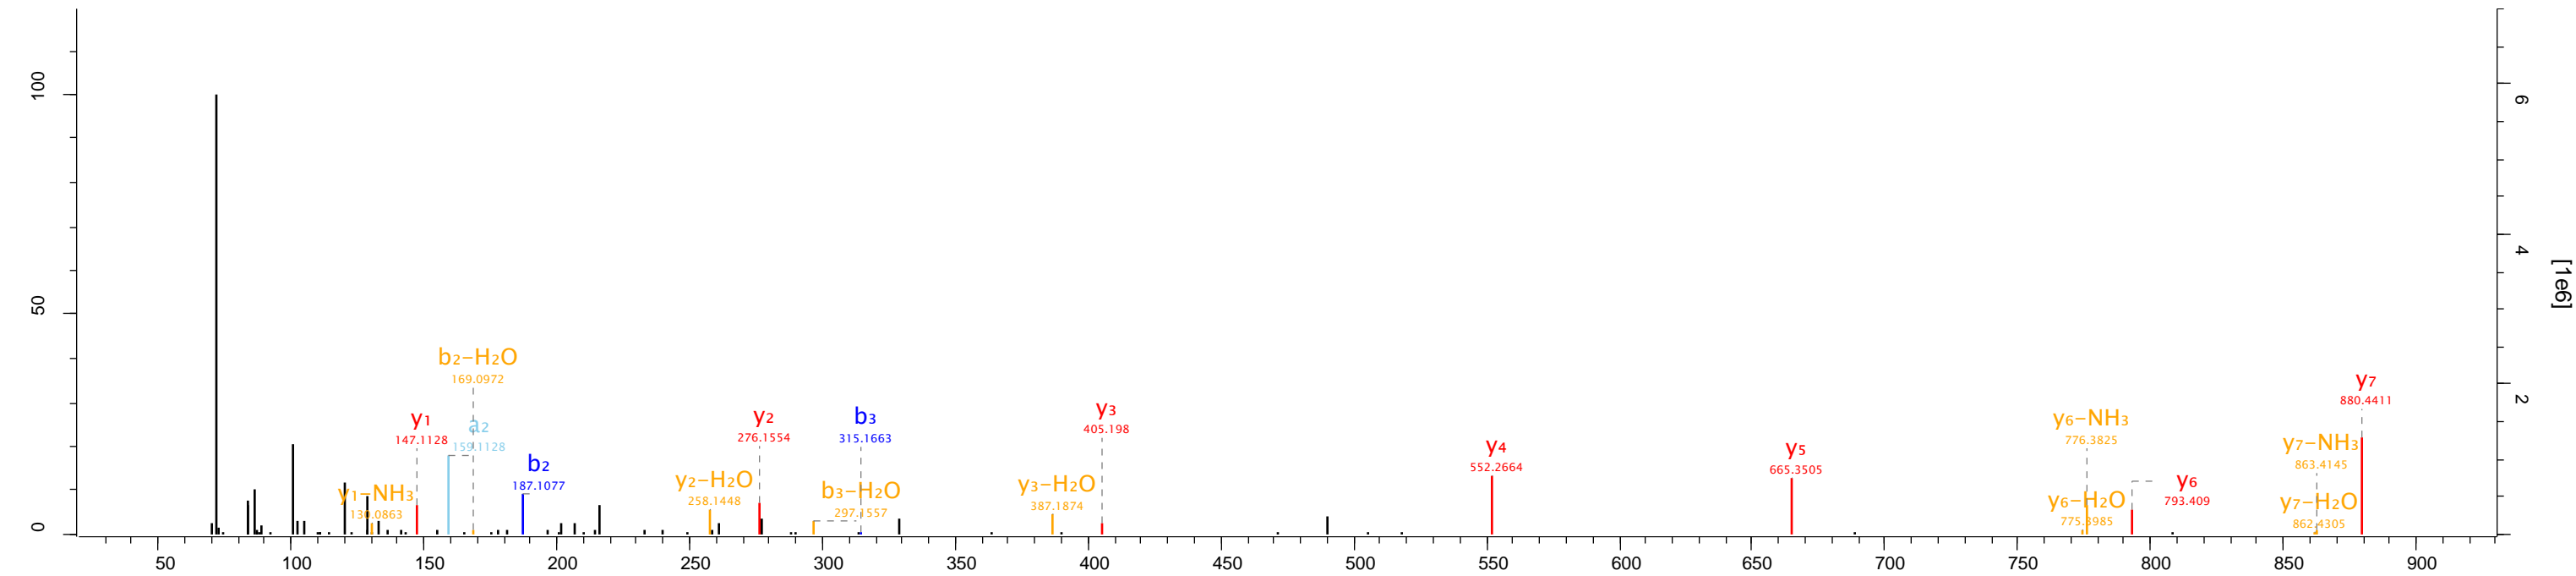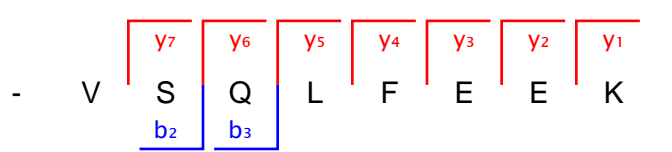

Raw file: 20140827\_EXQ00\_FaHo\_SA\_HIF1\_02  
 Scan: 8389 Method: FTMS; HCD Score: 55.75 m/z: 883 Gene names: RPS0A;RPS0B

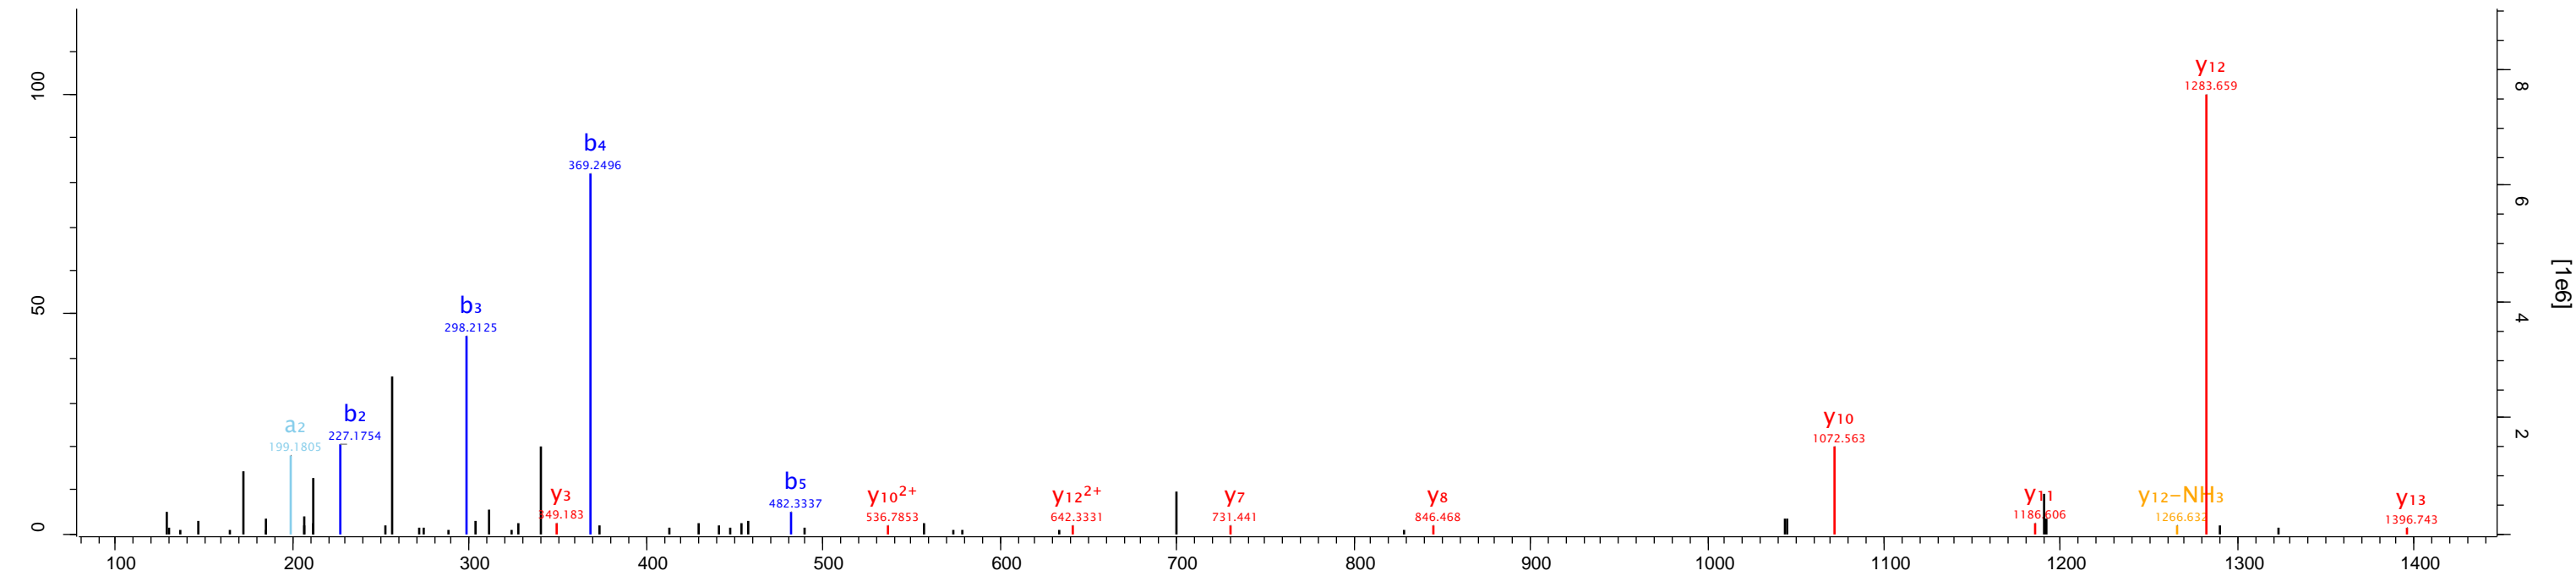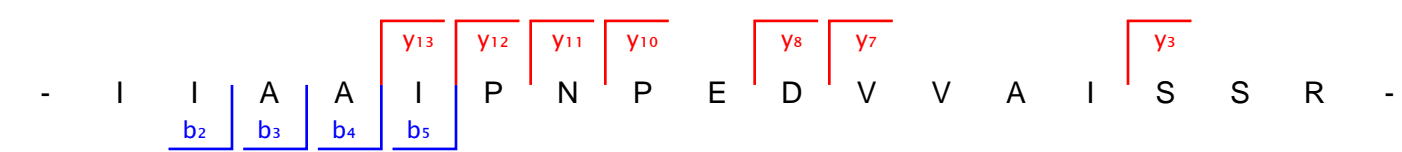

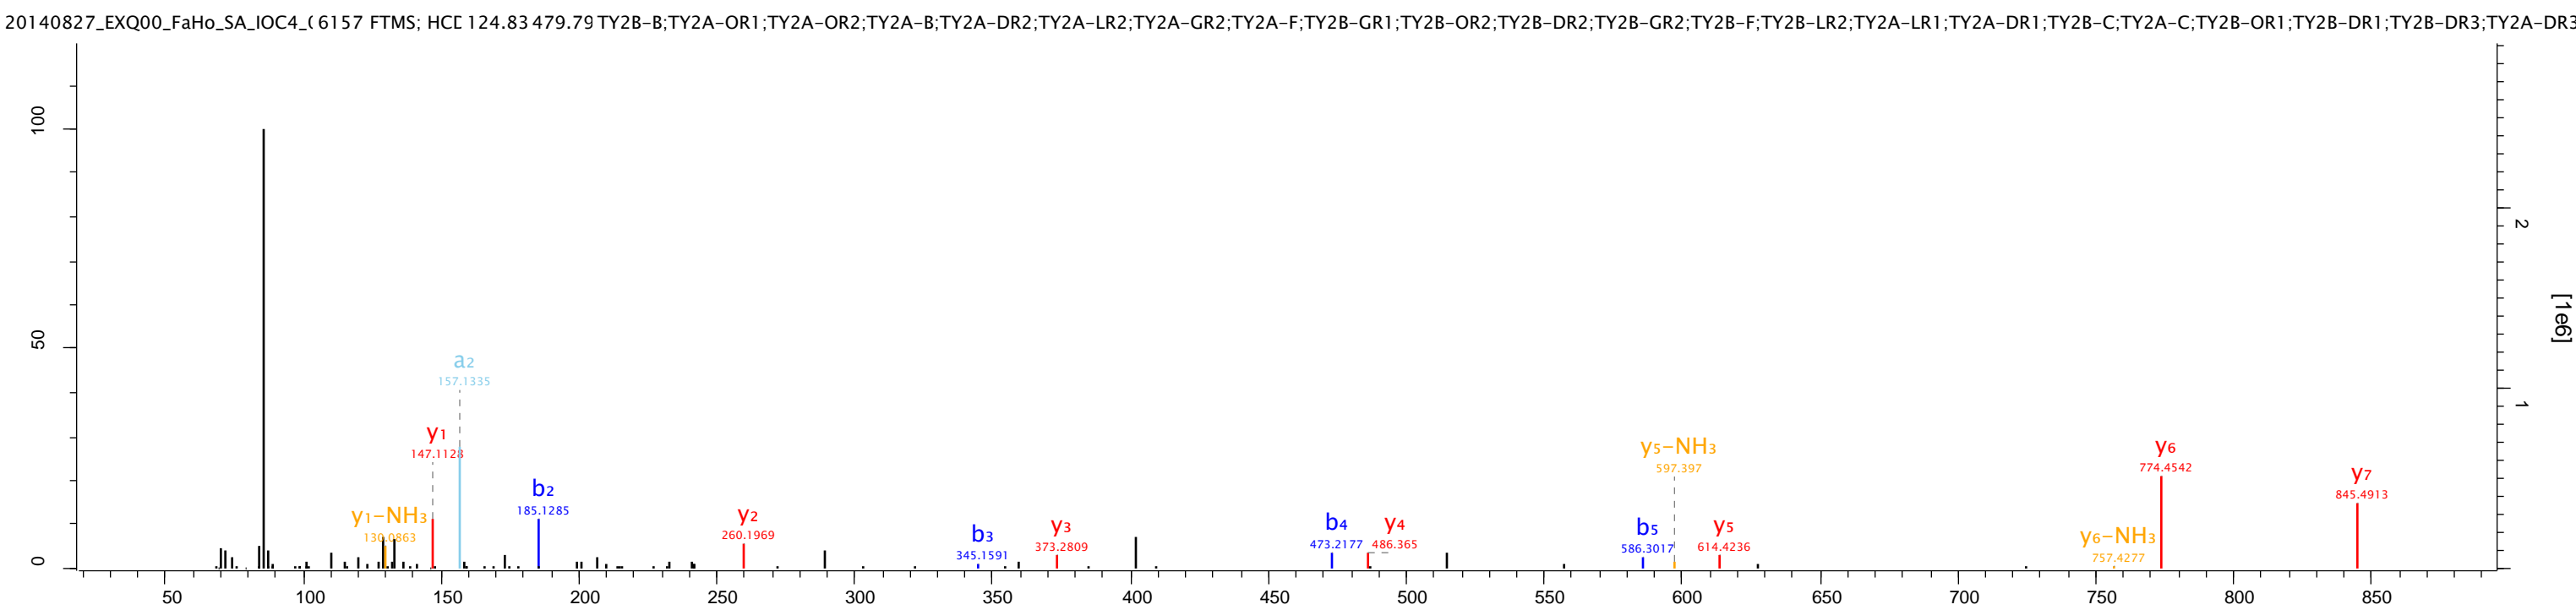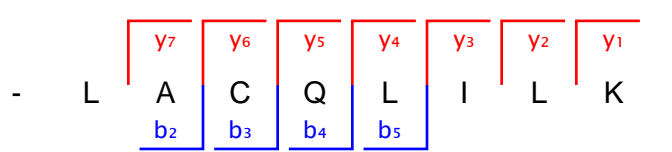

Raw file: 20140827\_EXQ00\_FaHo\_SA\_IOC4\_02  
 Scan: 8333 Method: FTMS; HCD Score: 128.98 m/z: 913.77 Gene names: TRX2

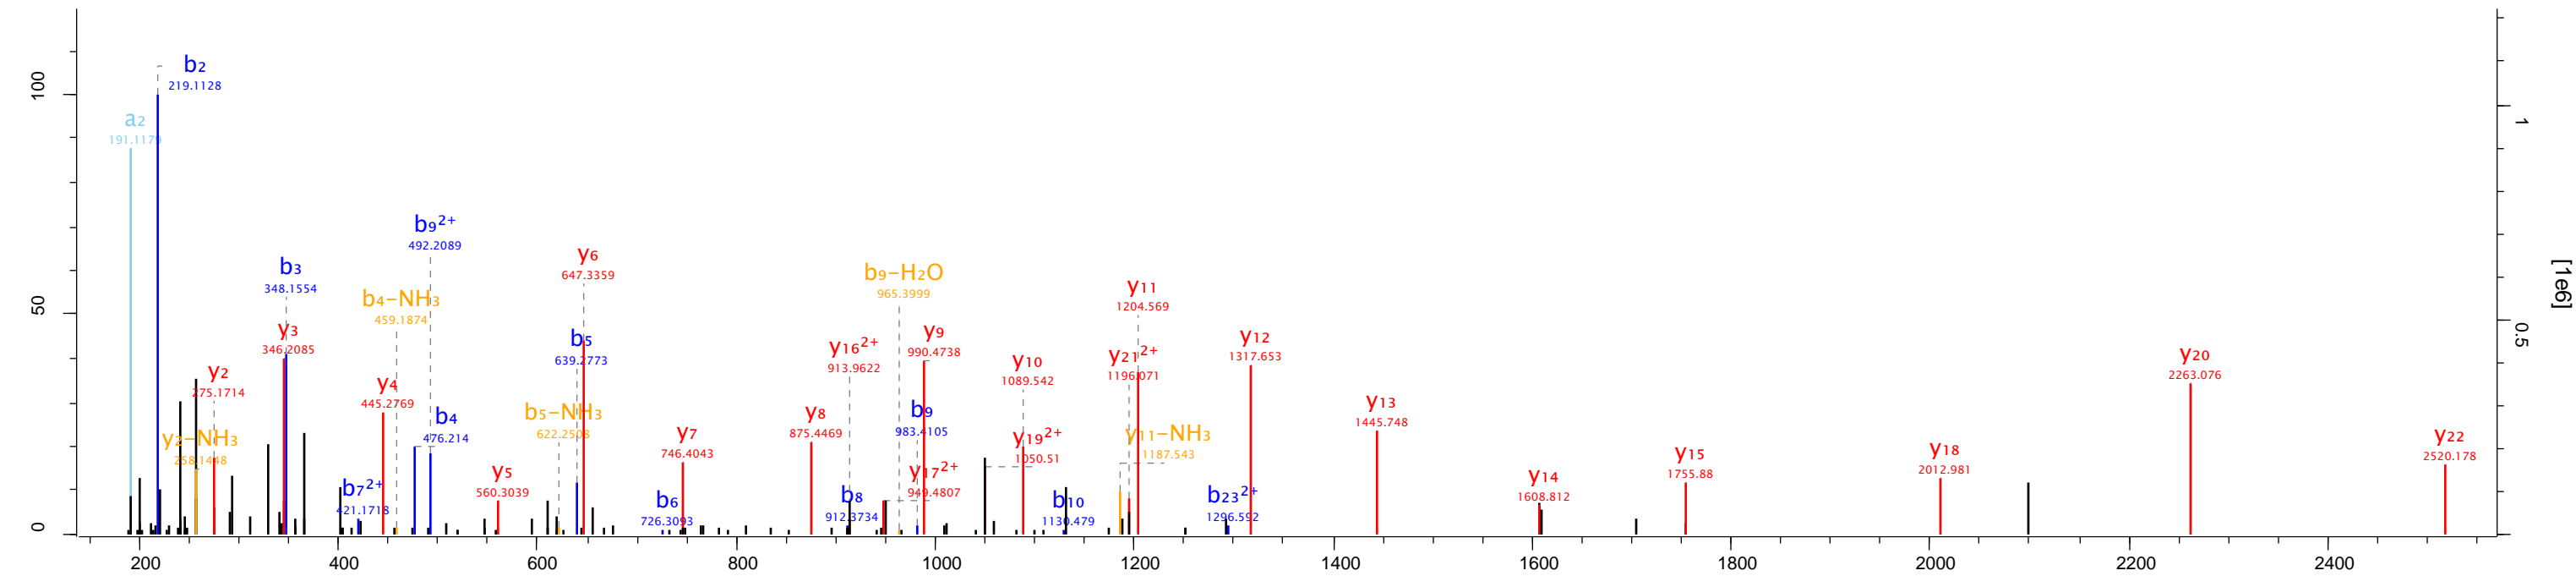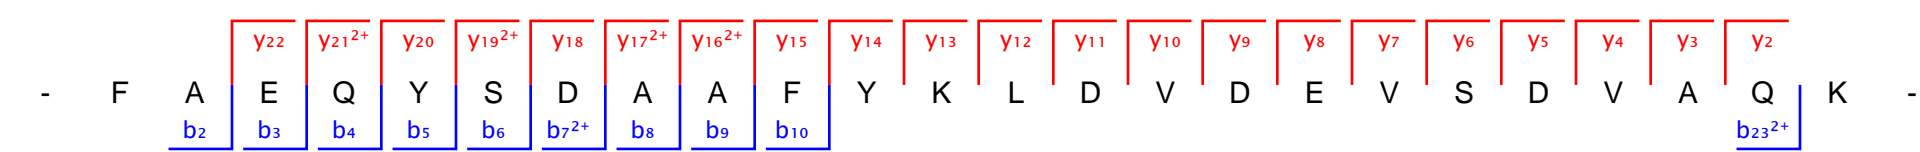

Raw file  
20140827\_EXQ00\_FaHo\_SA\_IOC4\_03

Scan 8458 Method FTMS; HCD Score 29.74 m/z 656.84 Gene names MRP2

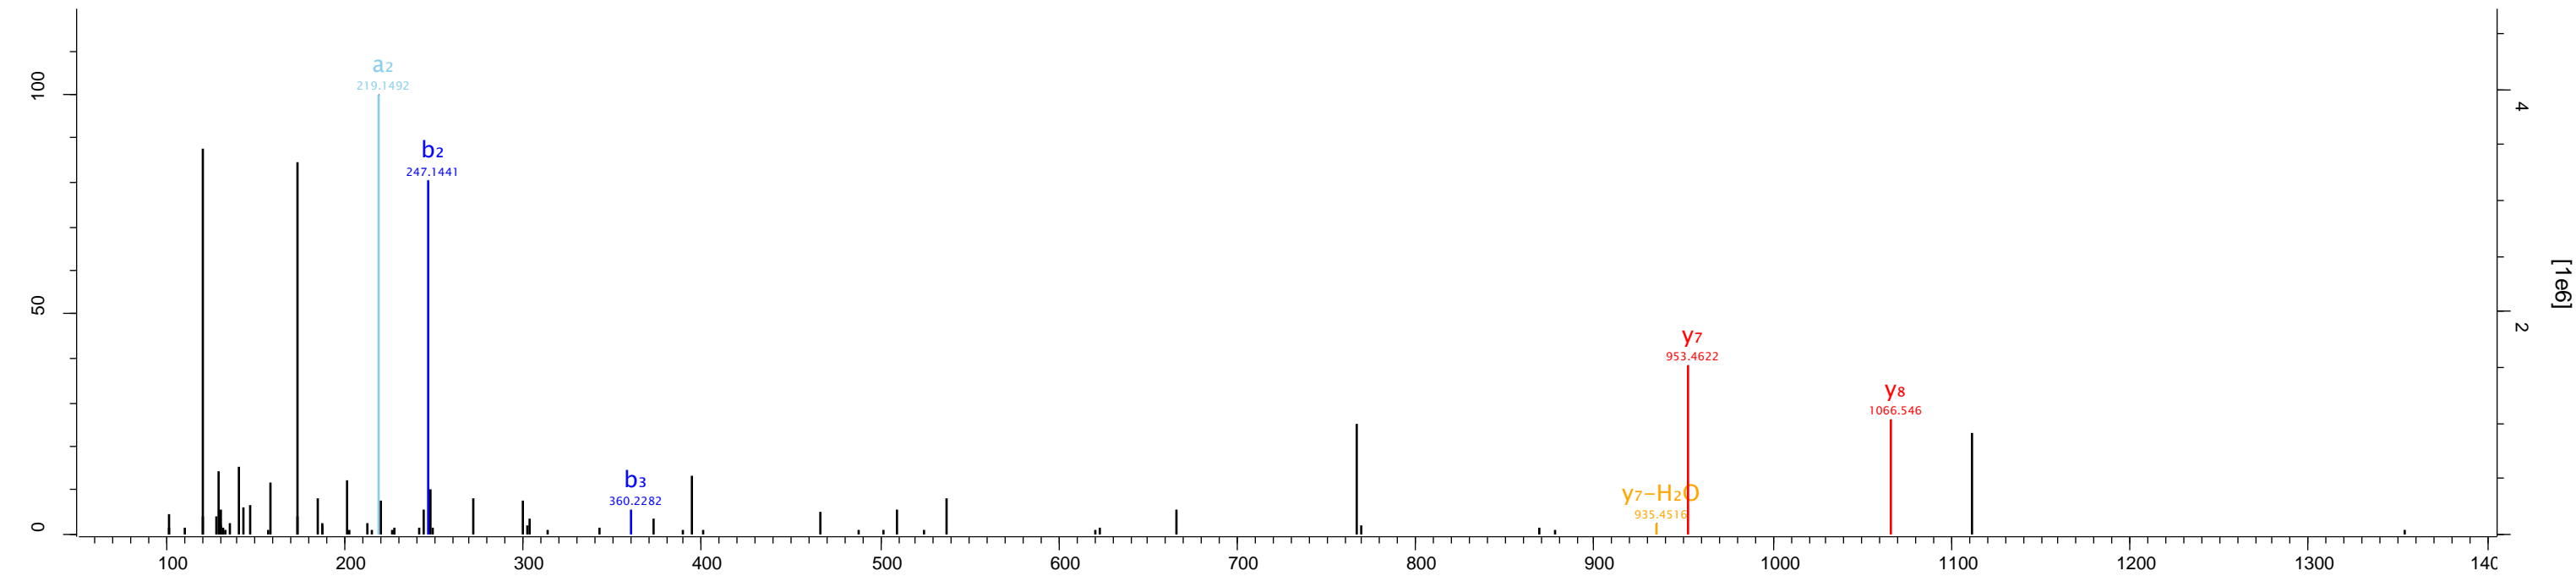

- F V L S D F R L C R -  
b2 b3 y8 y7

Raw file 20140827\_EXQ00\_FaHo\_SA\_parental\_01 Scan 4231 Method FTMS; HCD Score 98.05 m/z 386.24 Gene names RPL7A;RPL7B

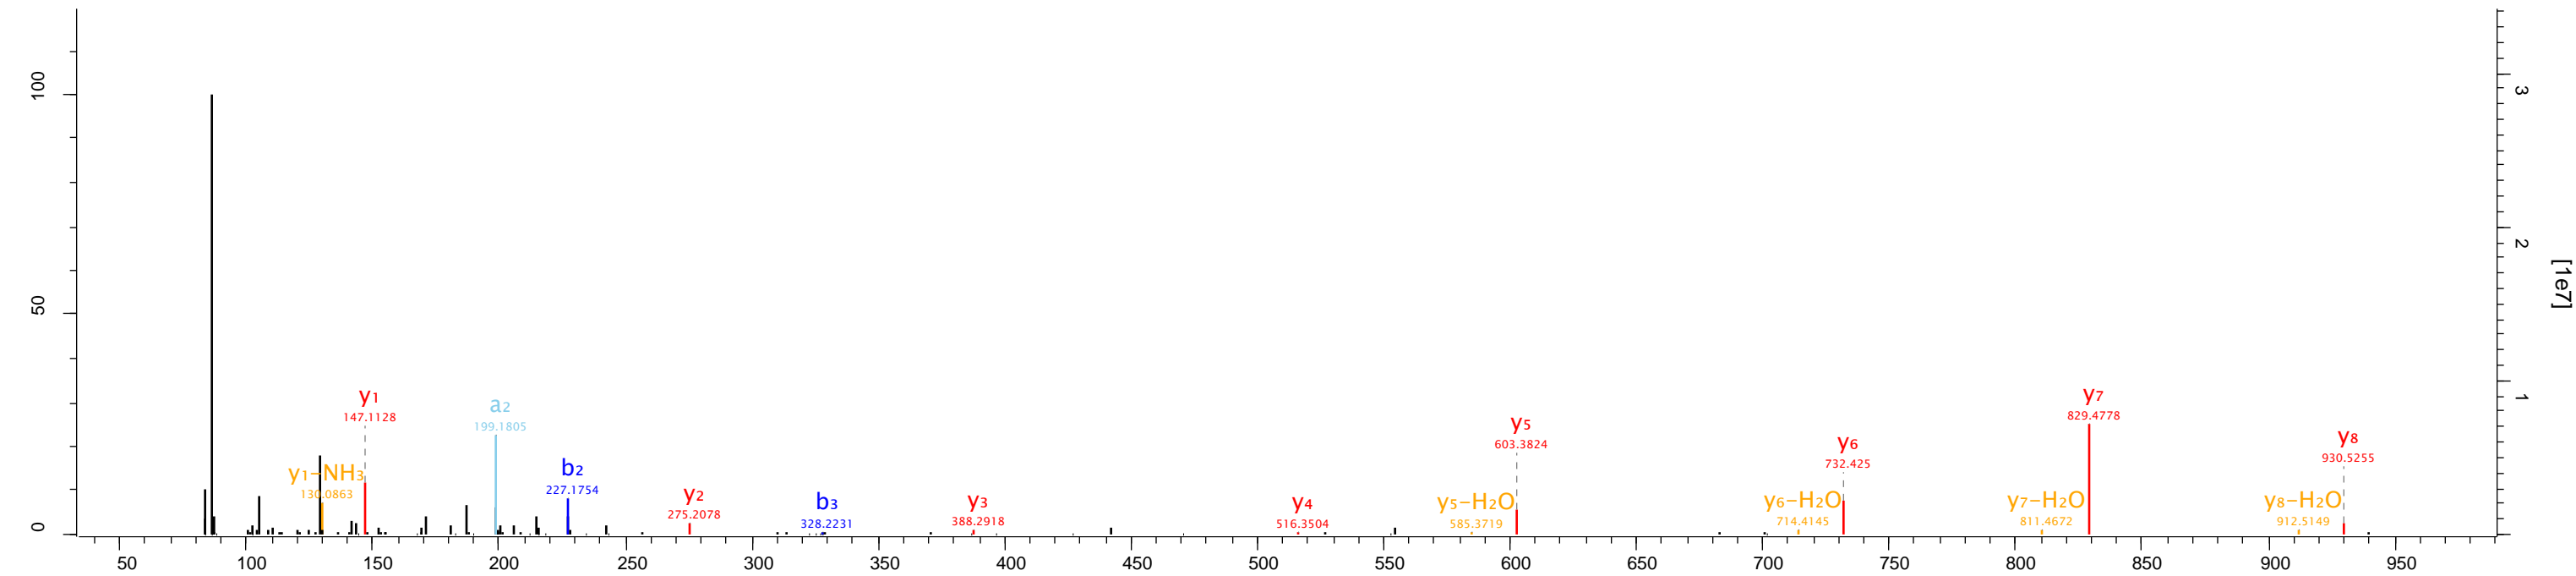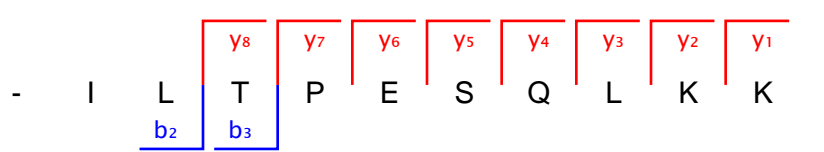

Raw file 20140827\_EXQ00\_FaHo\_SA\_parental\_01 Scan 4836 Method FTMS; HCD Score 68.54 m/z 659.78 Gene names YPR148C

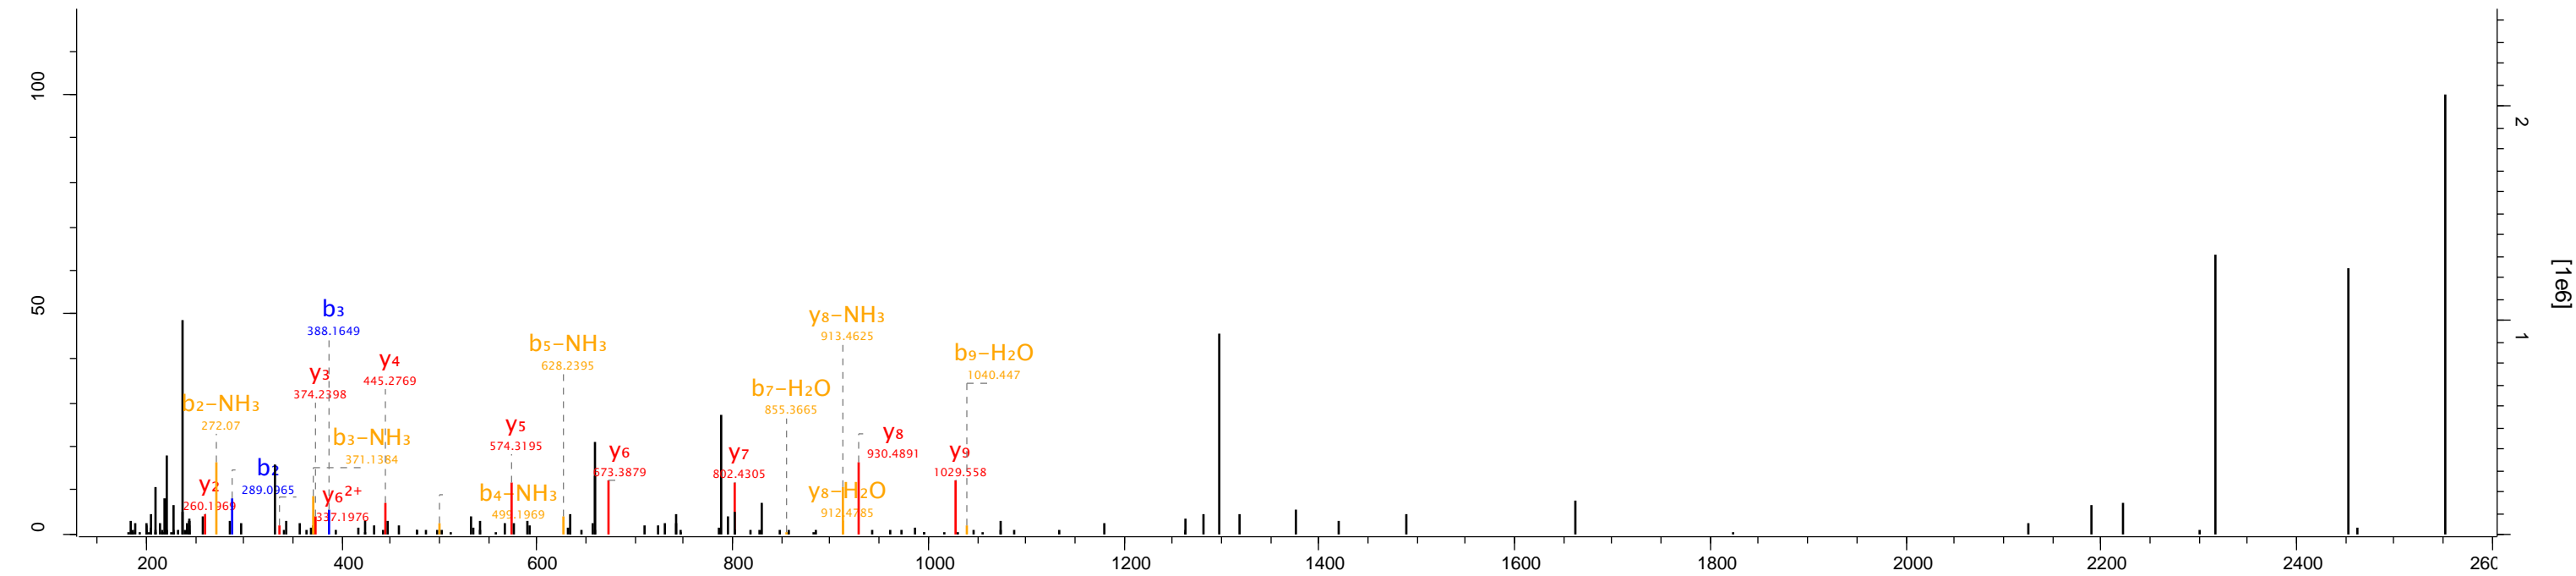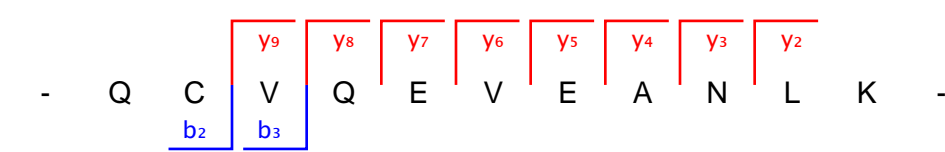

Raw file 20140827\_EXQ00\_FaHo\_SA\_parental\_01 Scan 5617 Method FTMS; HCD Score 71.5 m/z 456.78 Gene names RPS0A;RPS0B

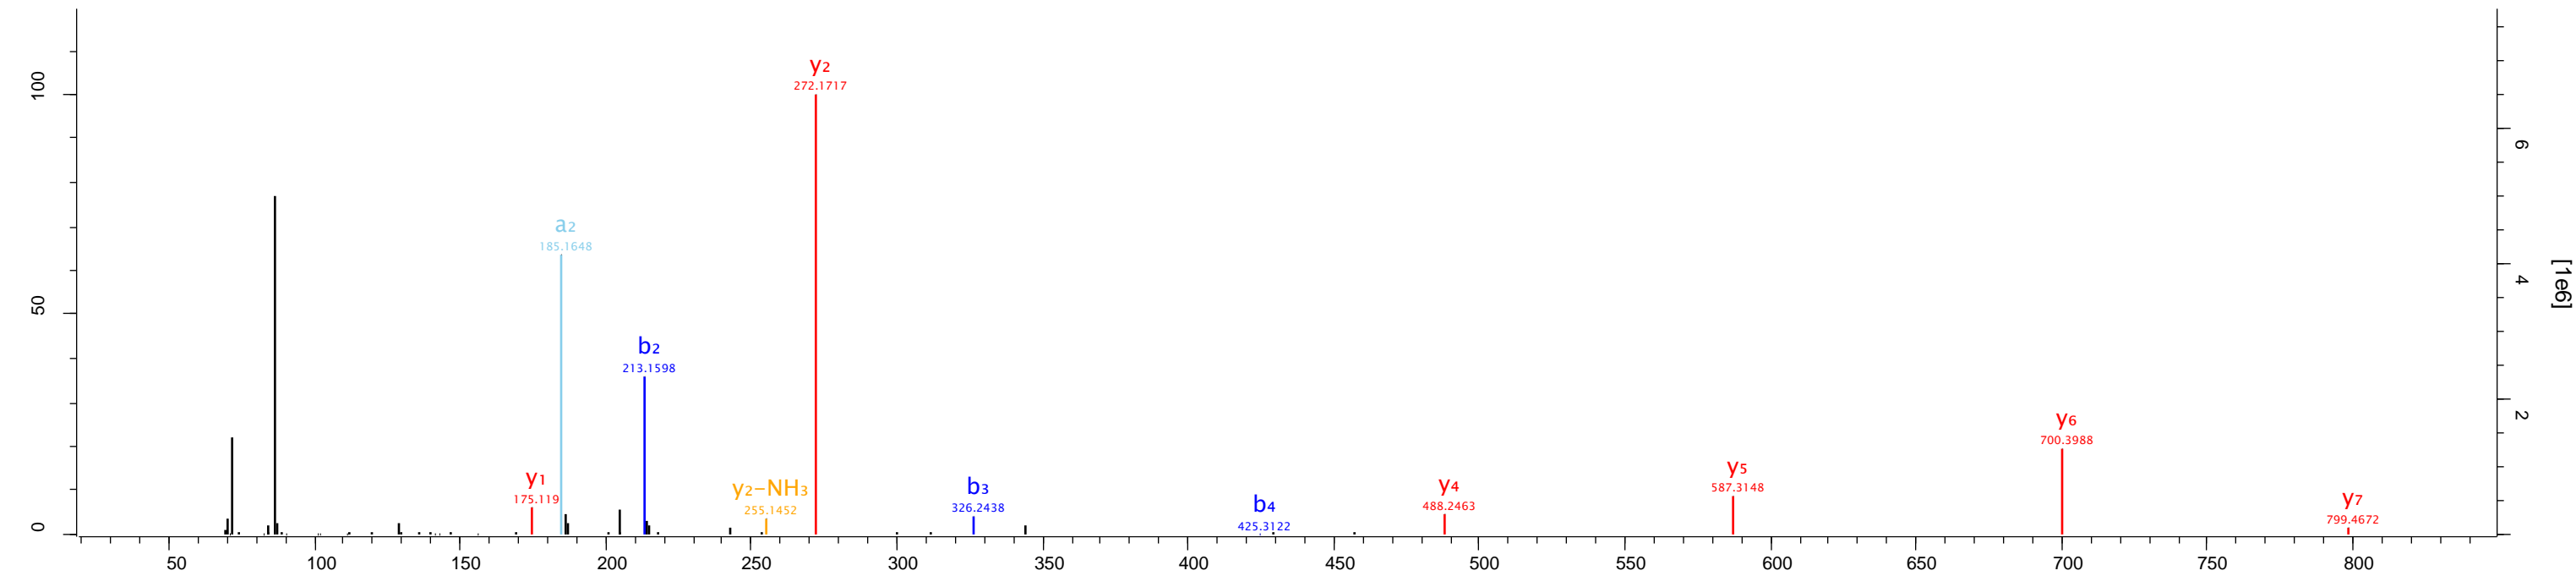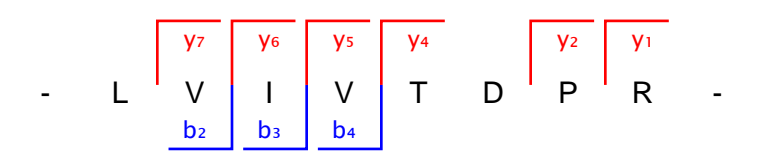



Raw file 20140827\_EXQ00\_FaHo\_SA\_parental\_02 Scan 3578 Method FTMS; HCD Score 131.04 m/z 379.72 Gene names RPS0B

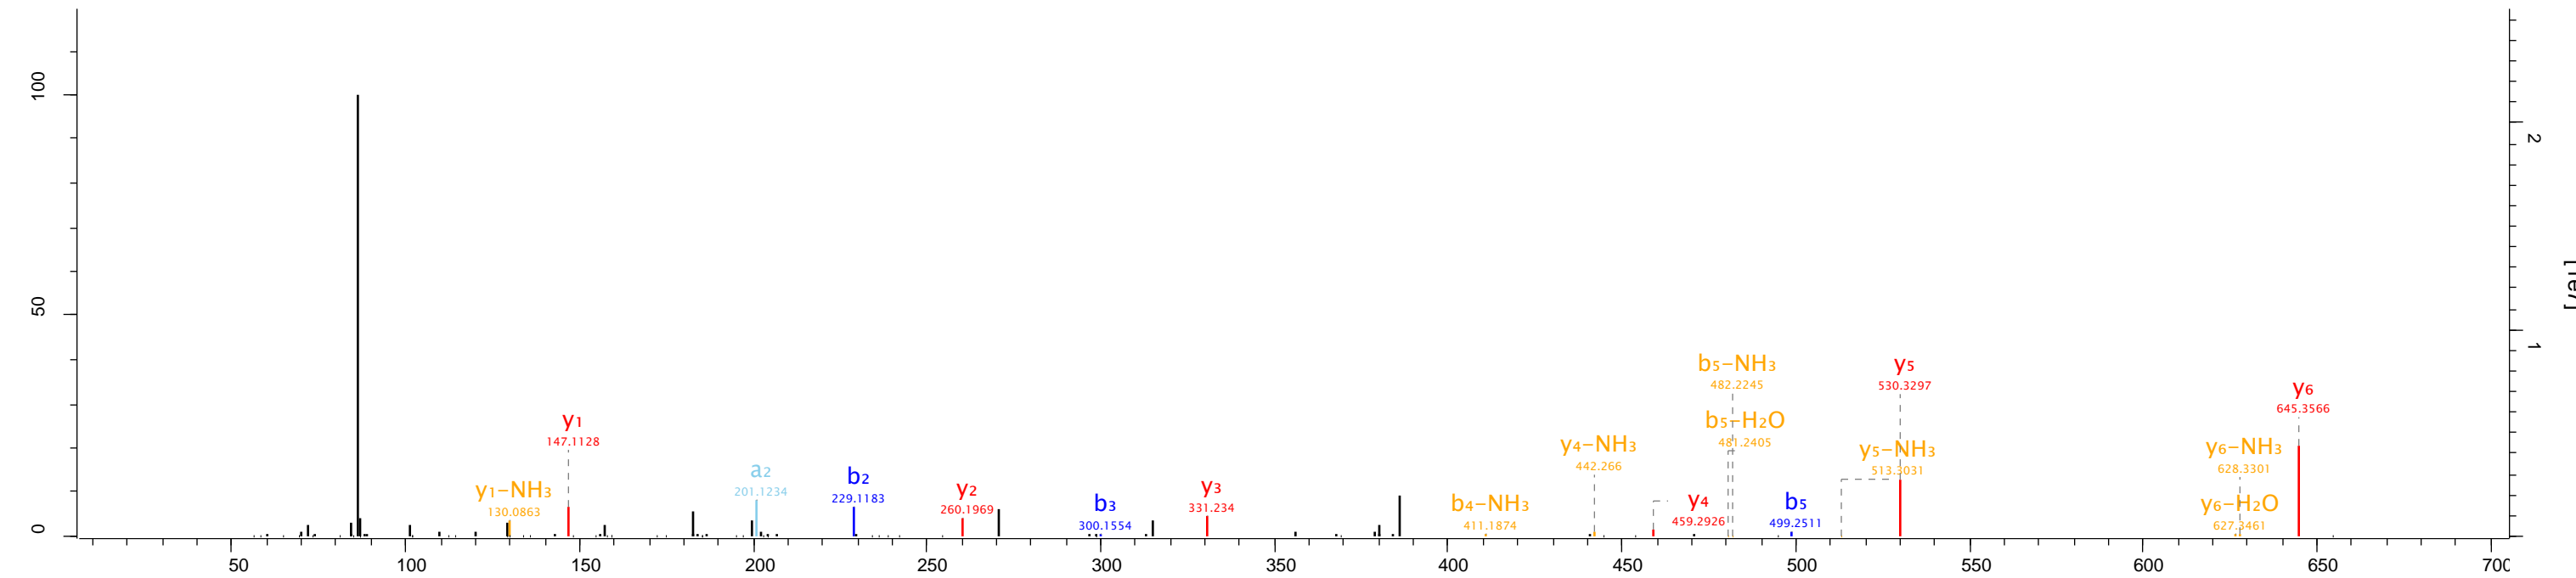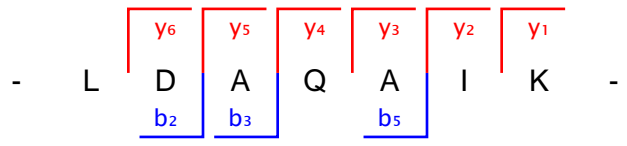

Raw file: 20140827\_EXQ00\_FaHo\_SA\_parental\_02  
 Scan: 6610 Method: FTMS; HCD Score: 170.11 m/z: 923.49 Gene names: RPL4B;RPL4A

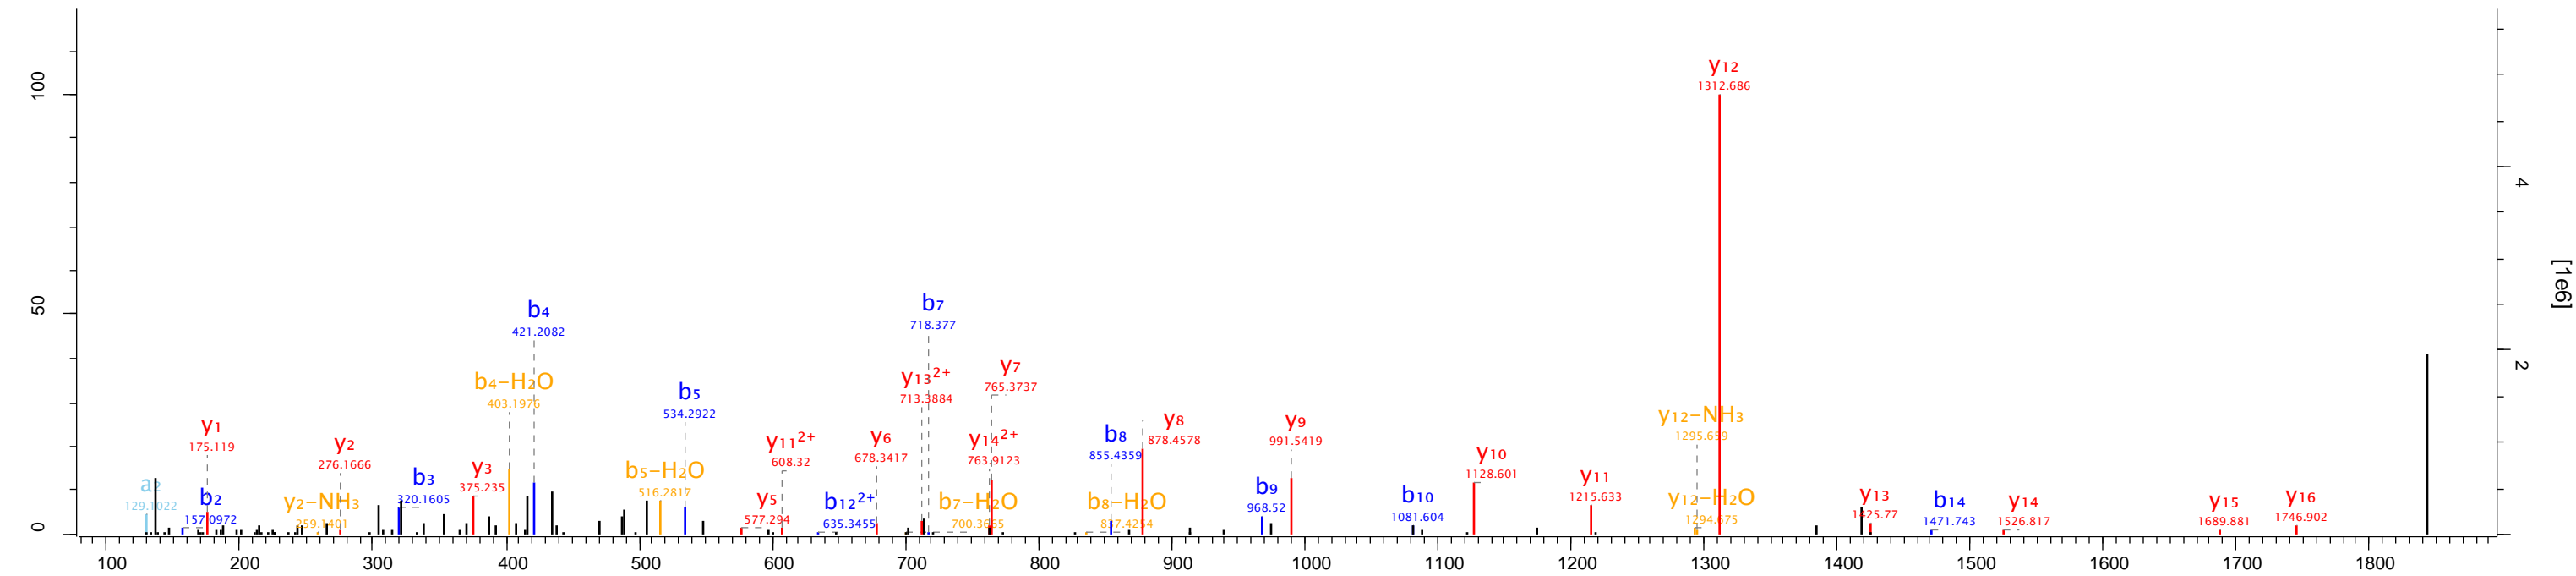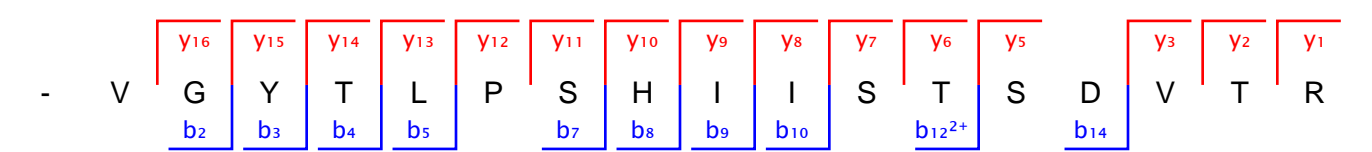

Raw file: 20140827\_EXQ00\_FaHo\_SA\_parental\_02  
 Scan: 8481 Method: FTMS; HCD Score: 99.54 m/z: 1140.57 Gene names: RPS0A;RPS0B

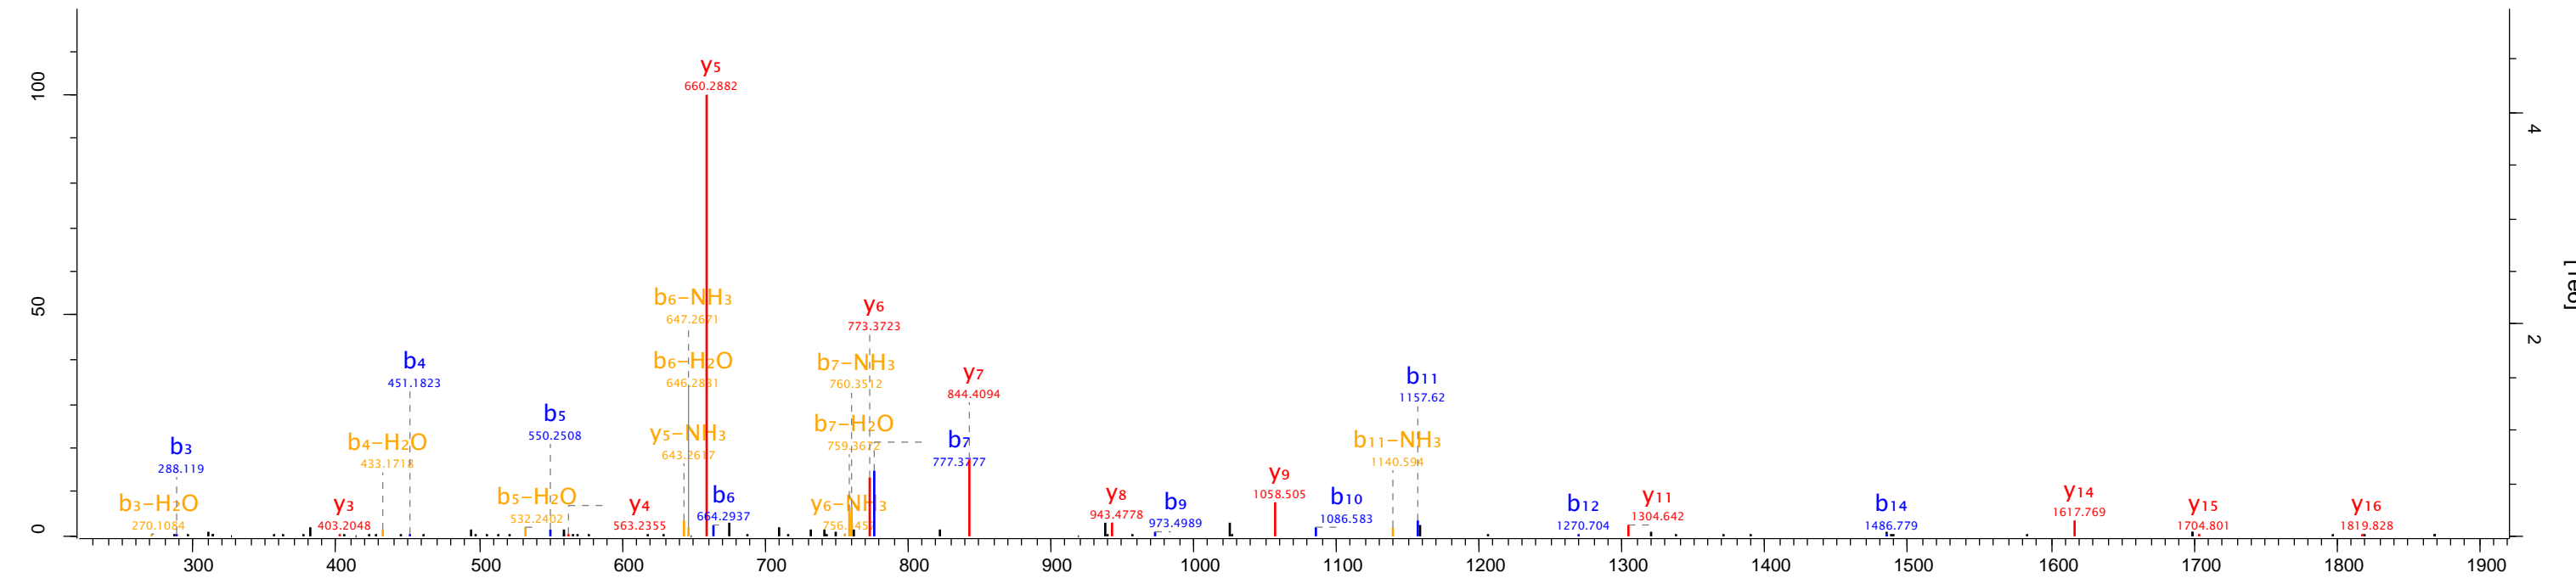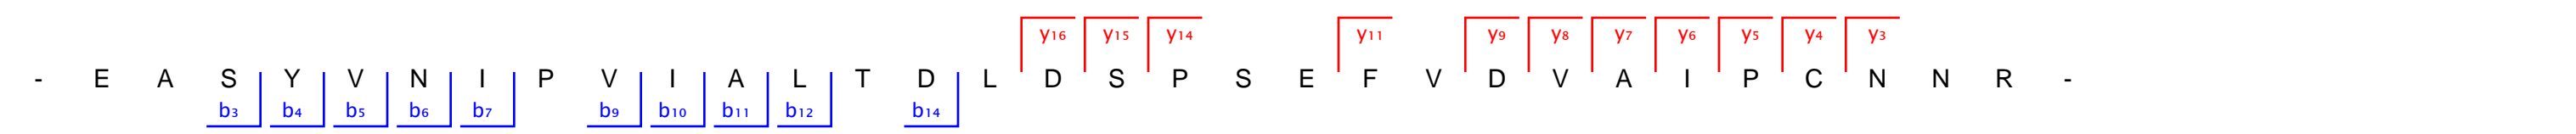

Raw file: 20140827\_EXQ00\_FaHo\_SA\_parental\_03  
 Scan: 3487 Method: FTMS; HCD Score: 149.17 m/z: 487.78 Gene names: RPL24A;RPL24B

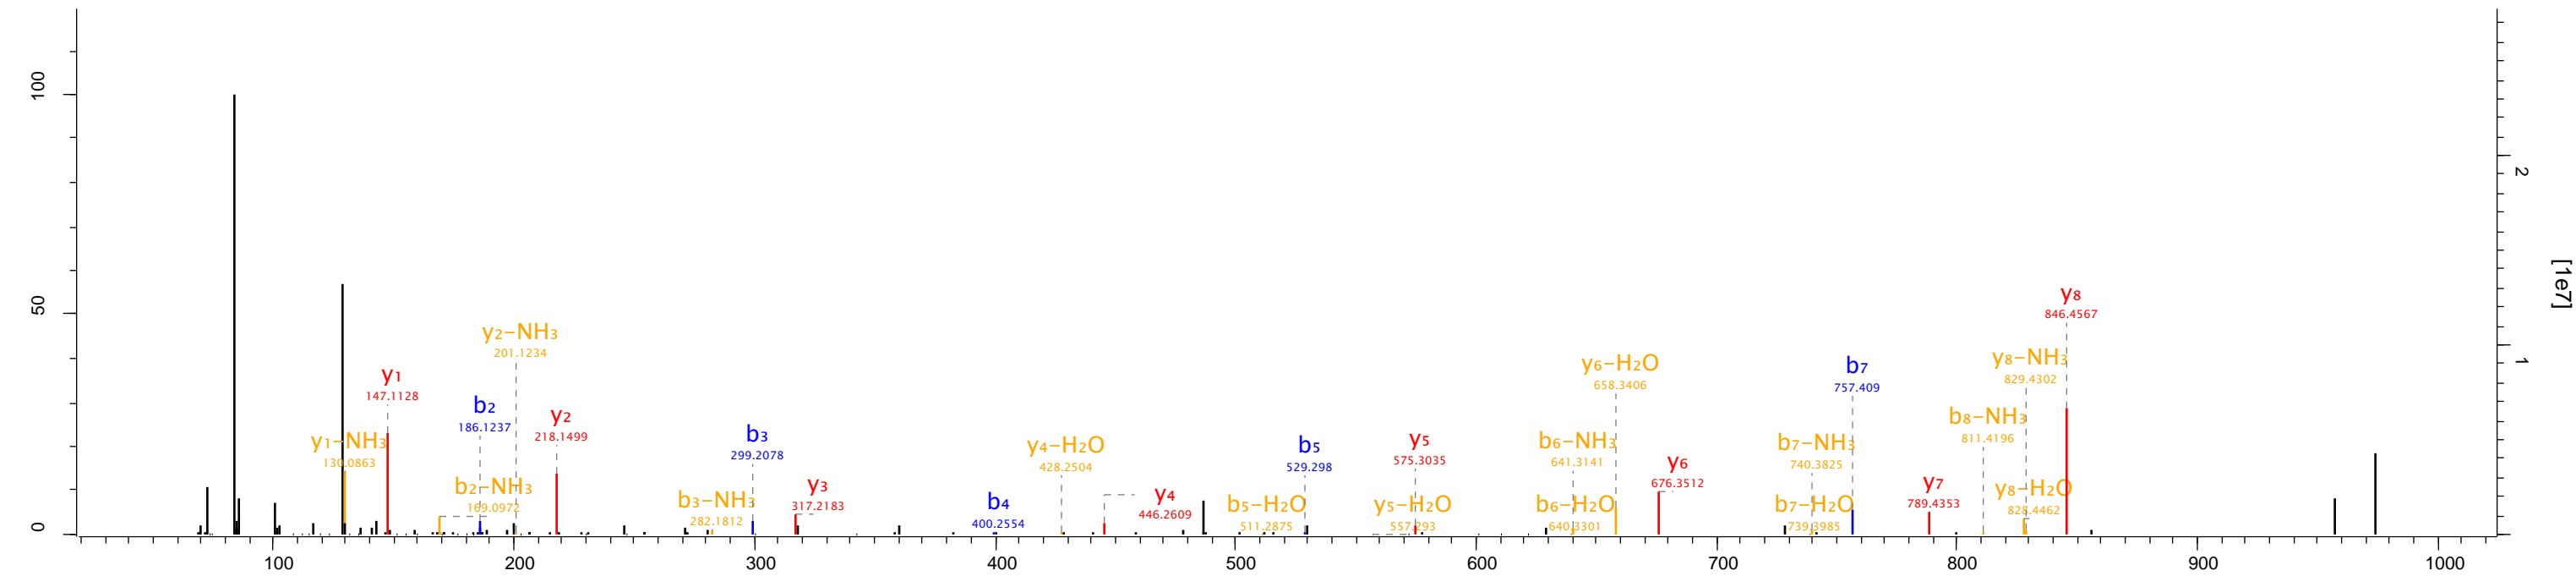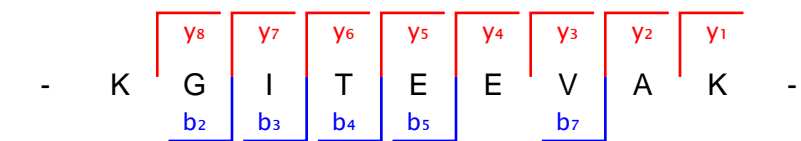

Raw file 20140827\_EXQ00\_FaHo\_SA\_parental\_03 Scan 7369 Method FTMS; HCD Score 75.02 m/z 823.94 Gene names NAP1

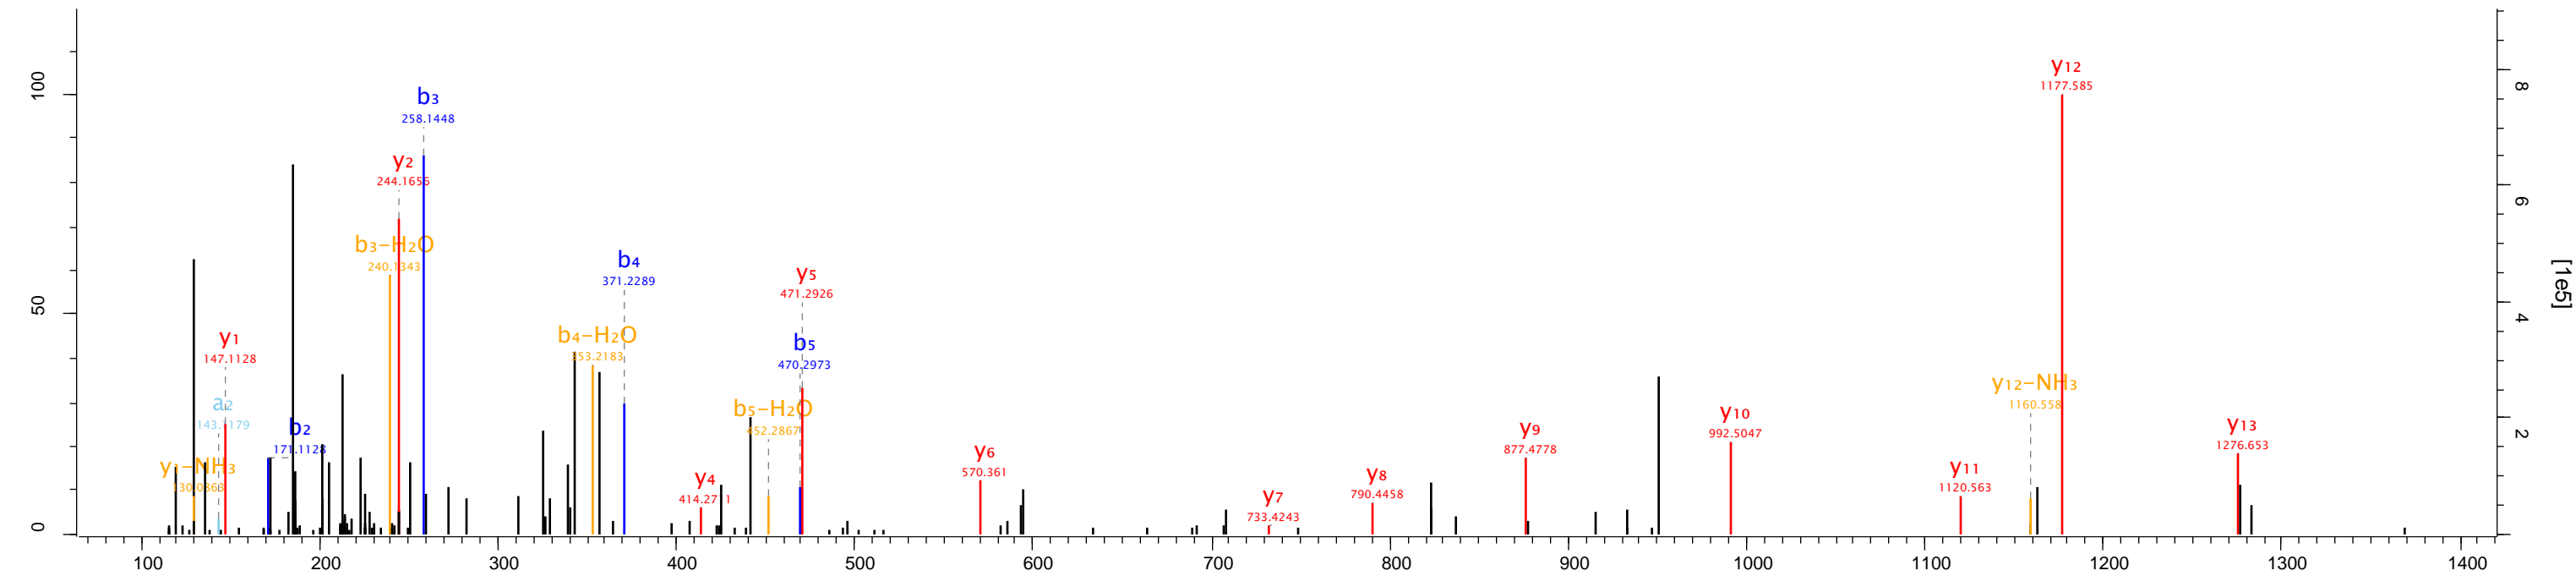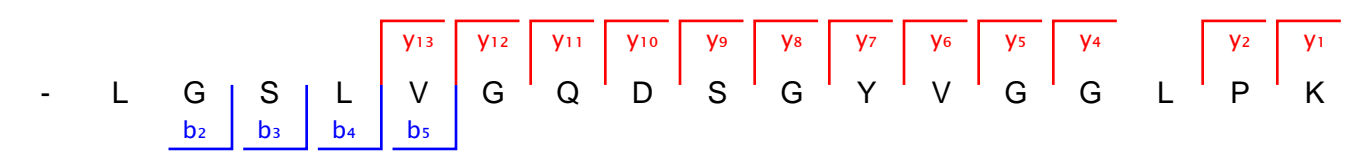

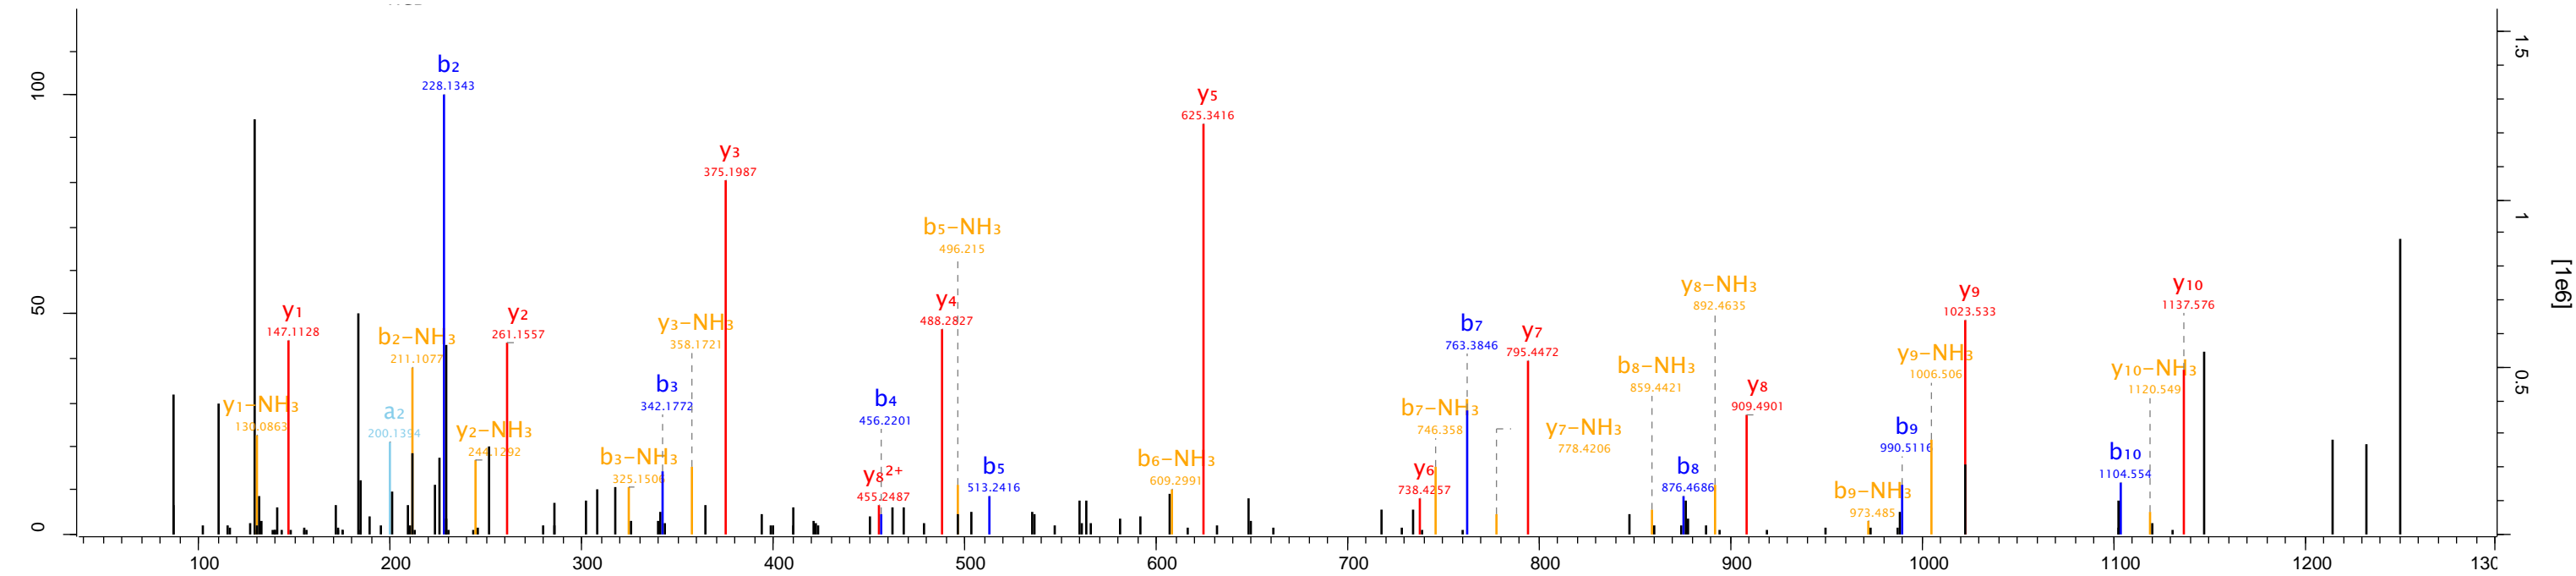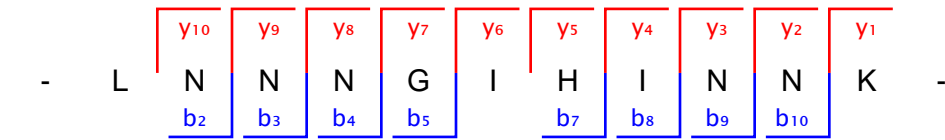

Raw file  
20140827\_EXQ00\_FaHo\_SA\_PHO23\_02

Scan 5468 Method FTMS; HCD Score 111.57 m/z 812.42 Gene names TY1A-PL;TY1A-LR2;TY1A-ER1;TY1A-DR6

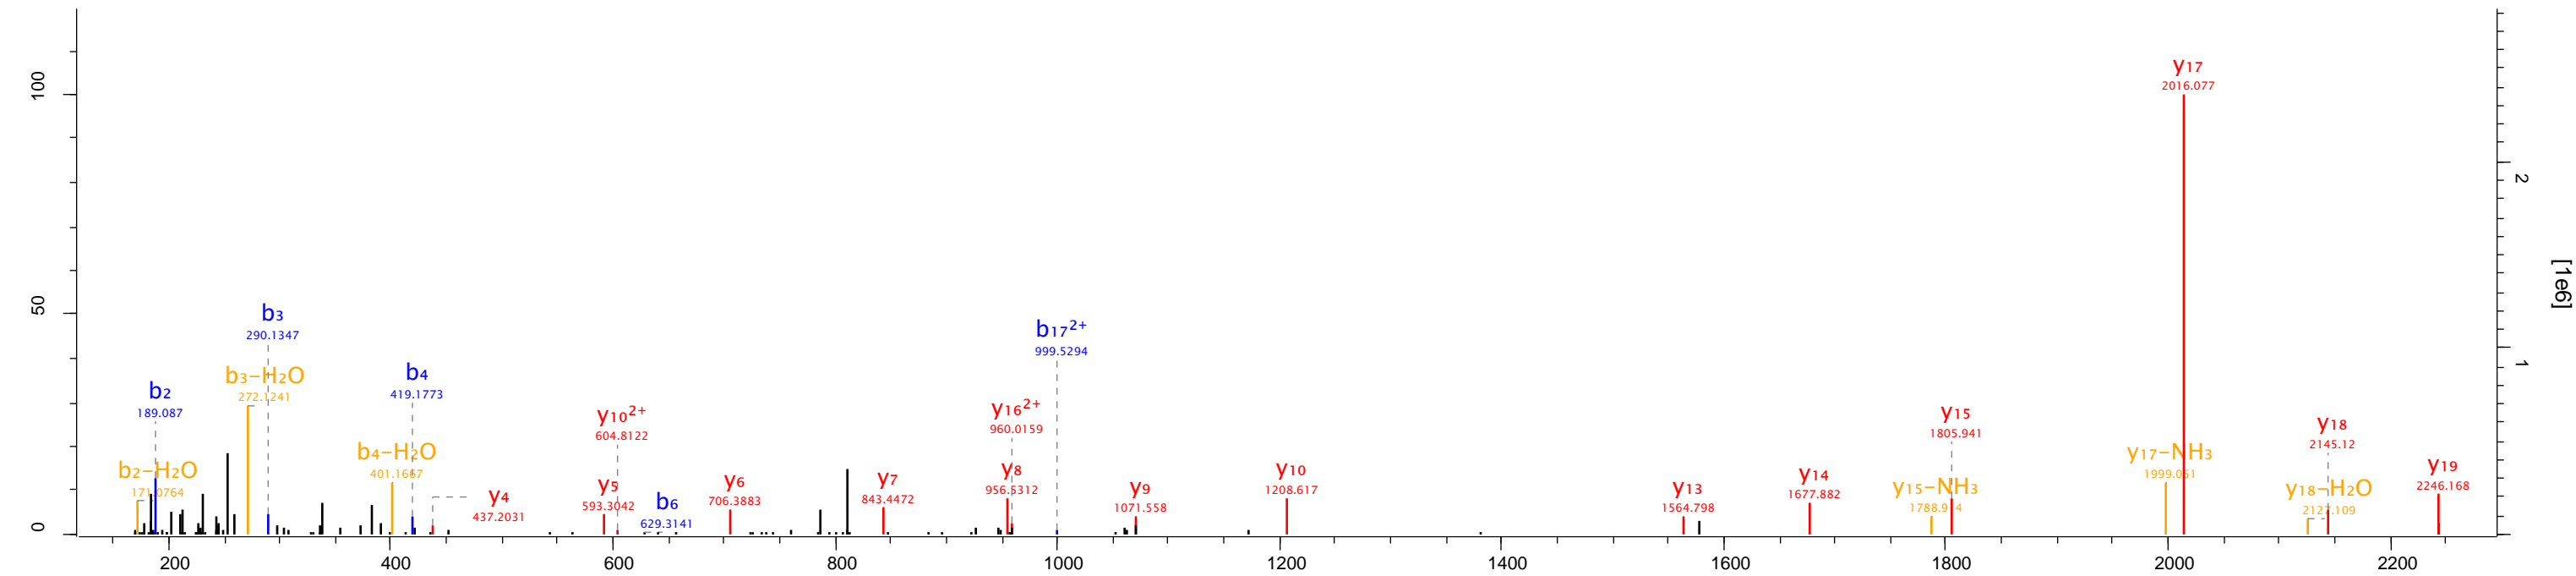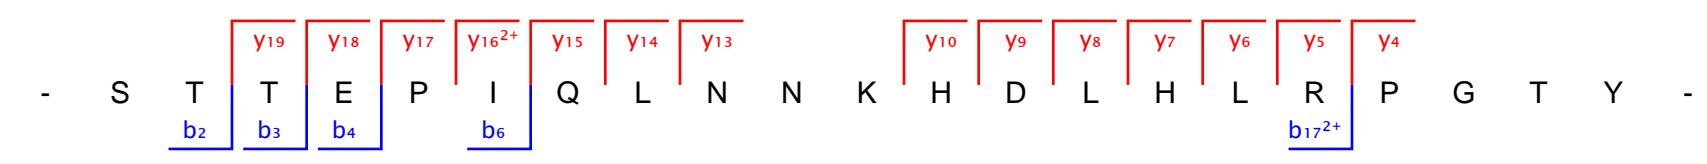

Raw file 20140827\_EXQ00\_FaHo\_SA\_PHO23\_02 Scan 5553 Method FTMS; HCD Score 96.23 m/z 572.82 Gene names RXT3

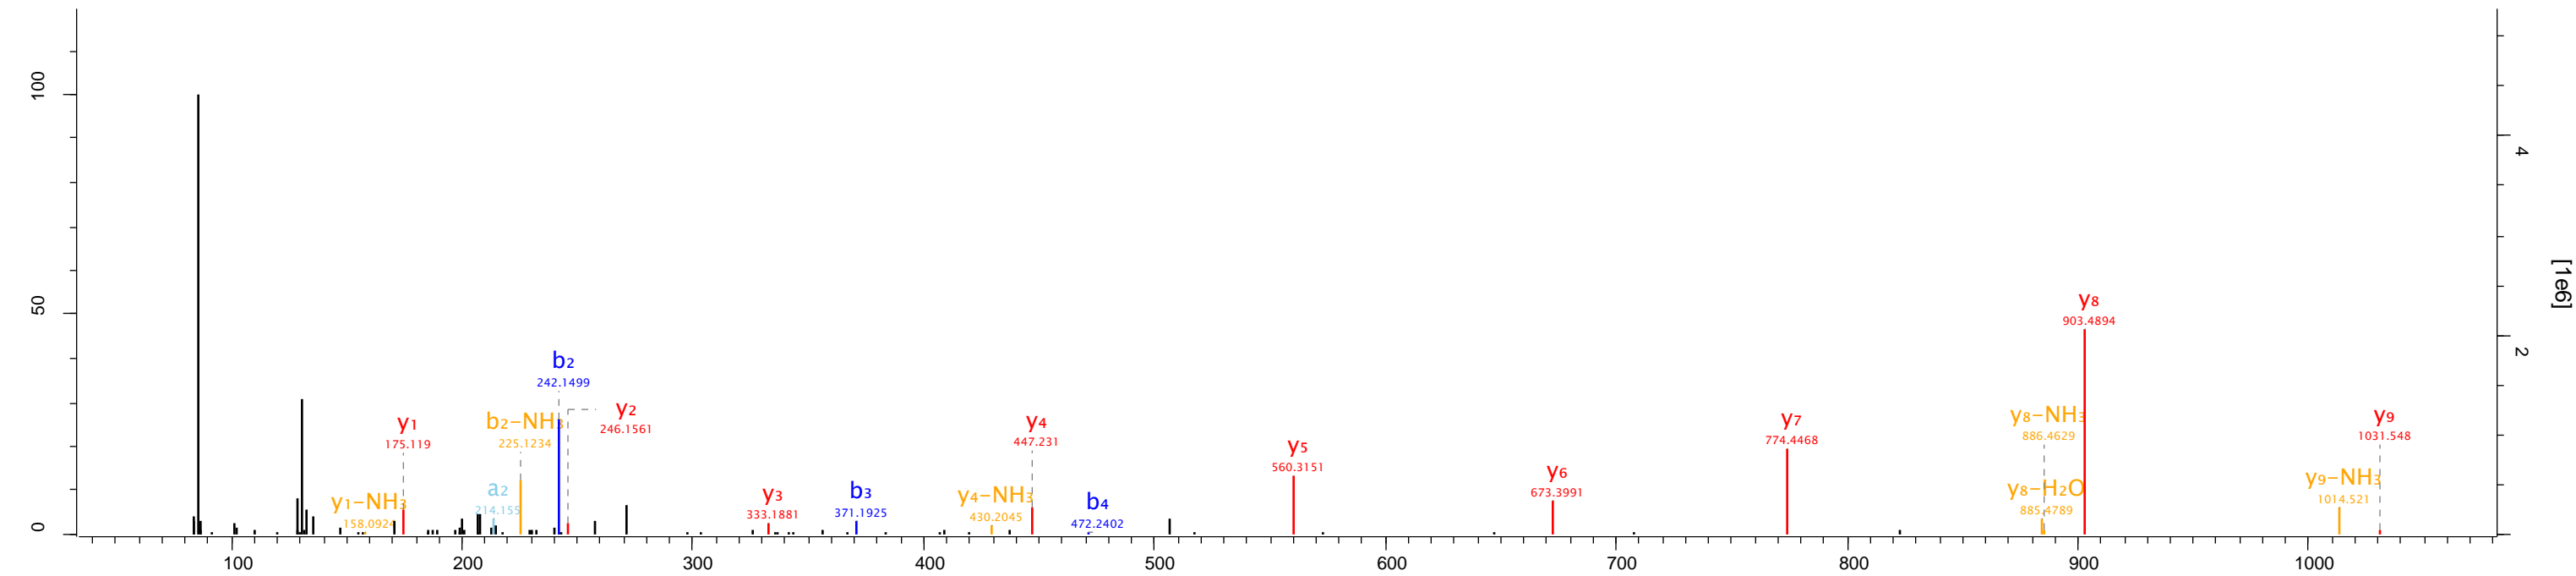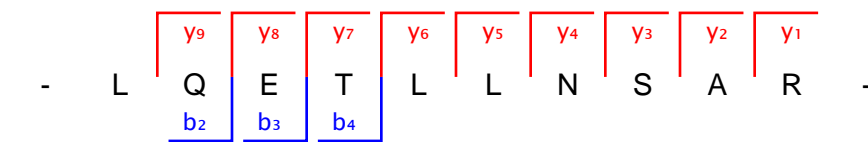



Raw file  
20140827\_EXQ00\_FaHo\_SA\_PHO23\_03

| Scan | Method    | Score | m/z    | Gene names |
|------|-----------|-------|--------|------------|
| 2902 | FTMS; HCD | 54.19 | 352.19 | IDH1       |

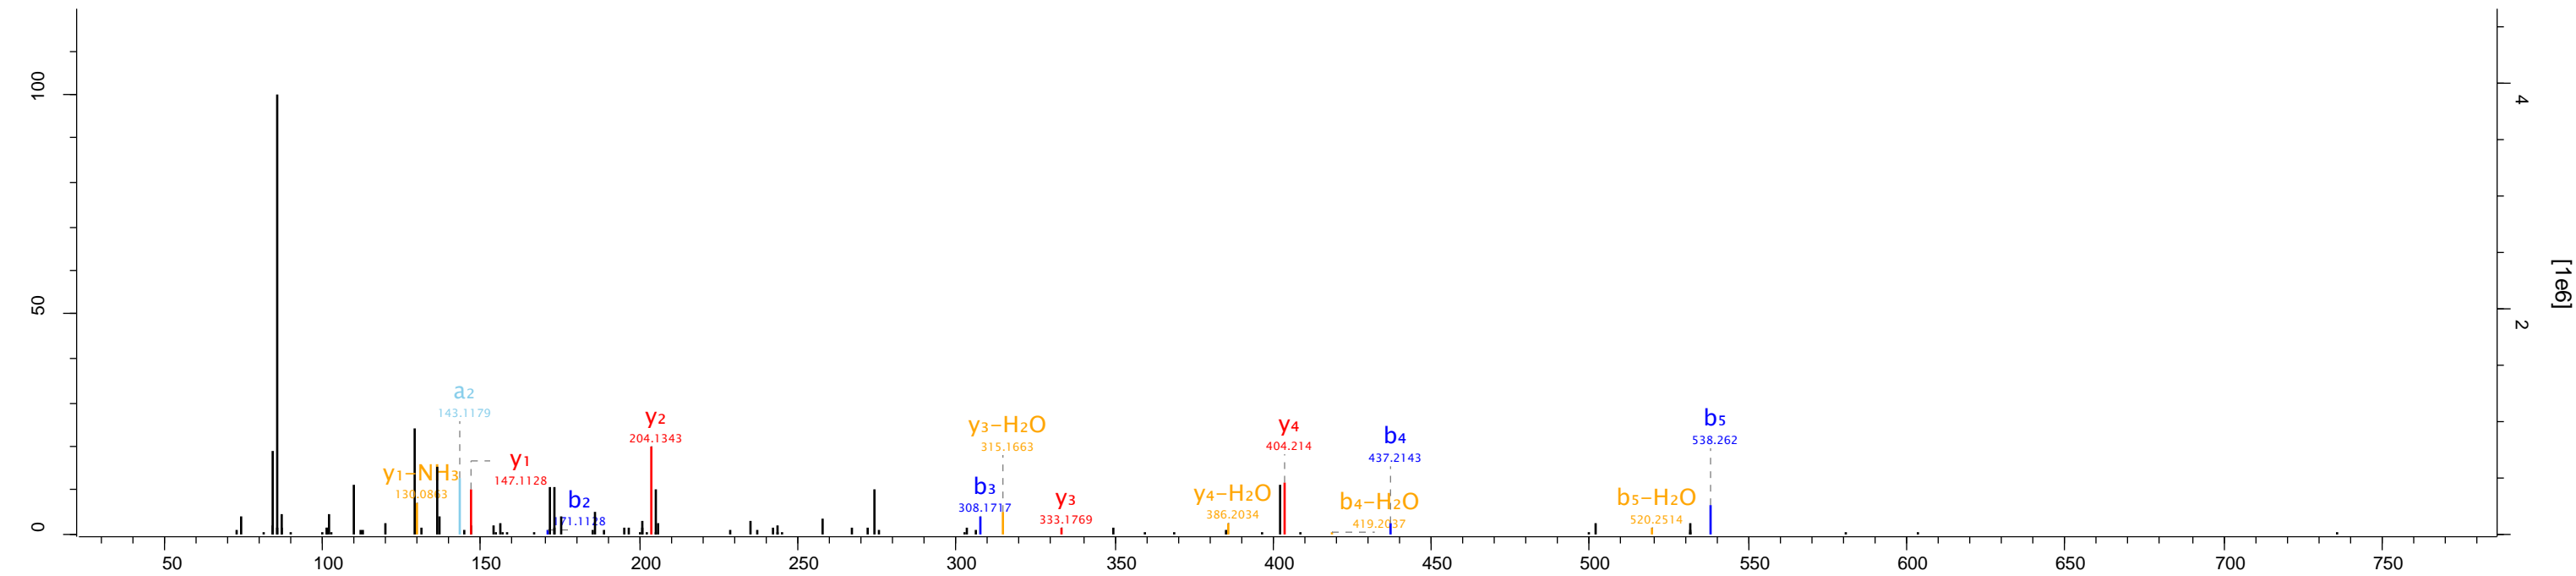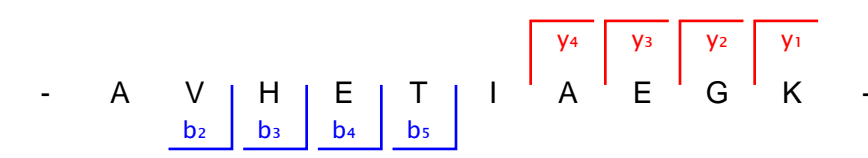

Raw file 20140827\_EXQ00\_FaHo\_SA\_RCO1\_01 Scan 5649 Method FTMS; HCD Score 118.76 m/z 437.89 Gene names RPL24A

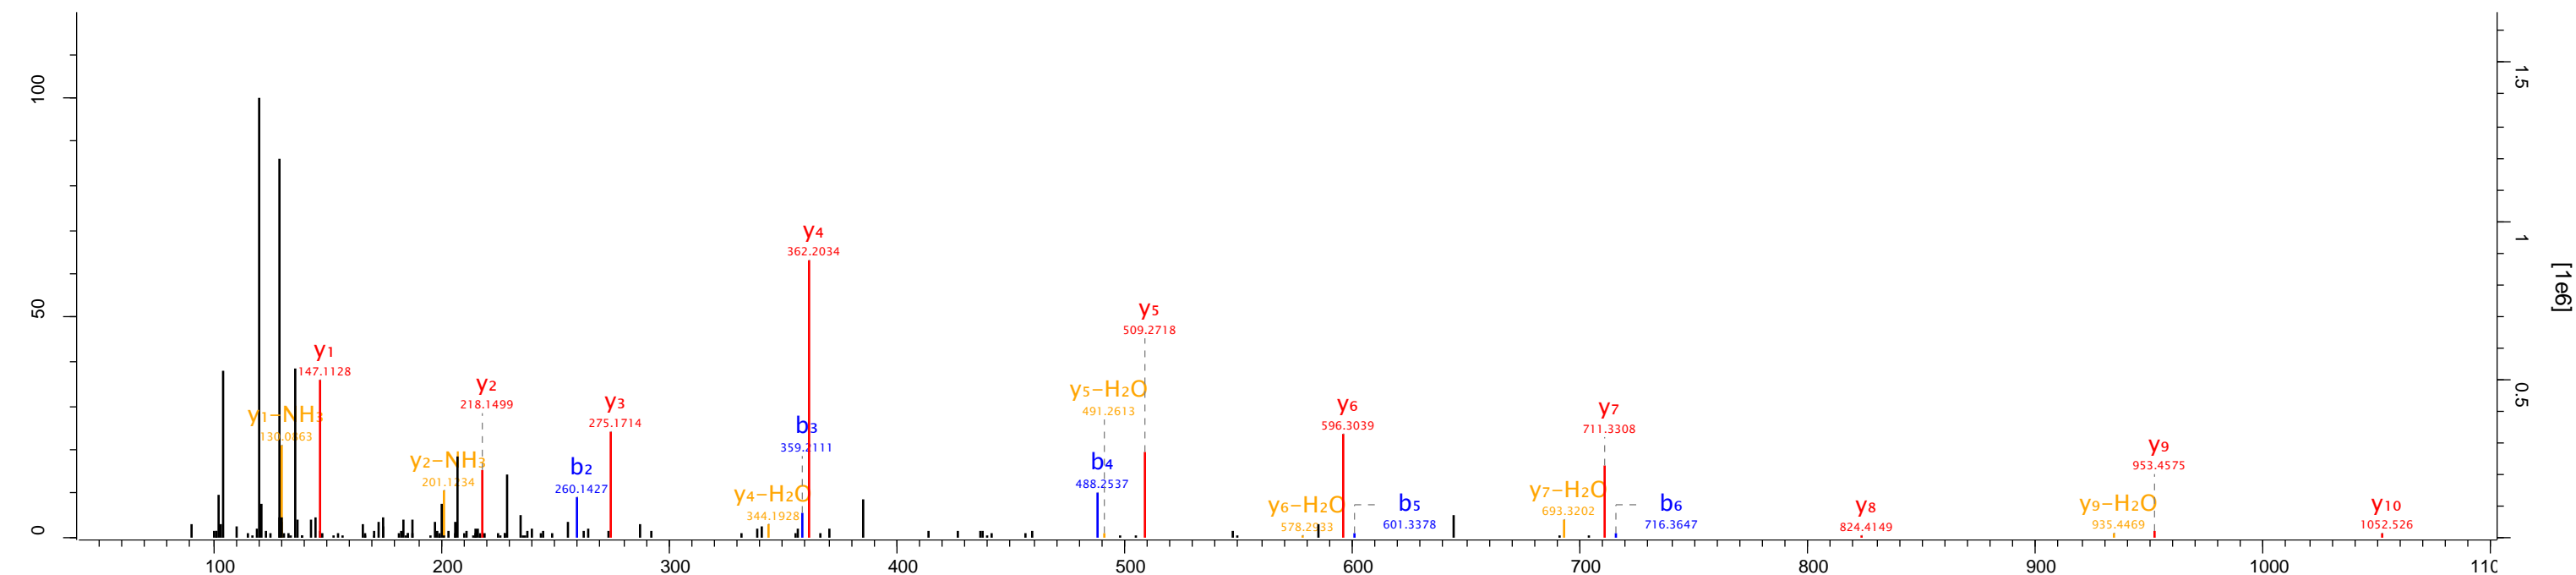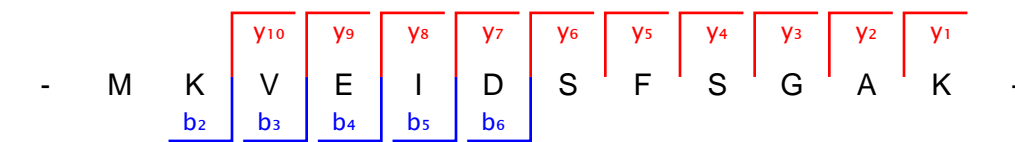

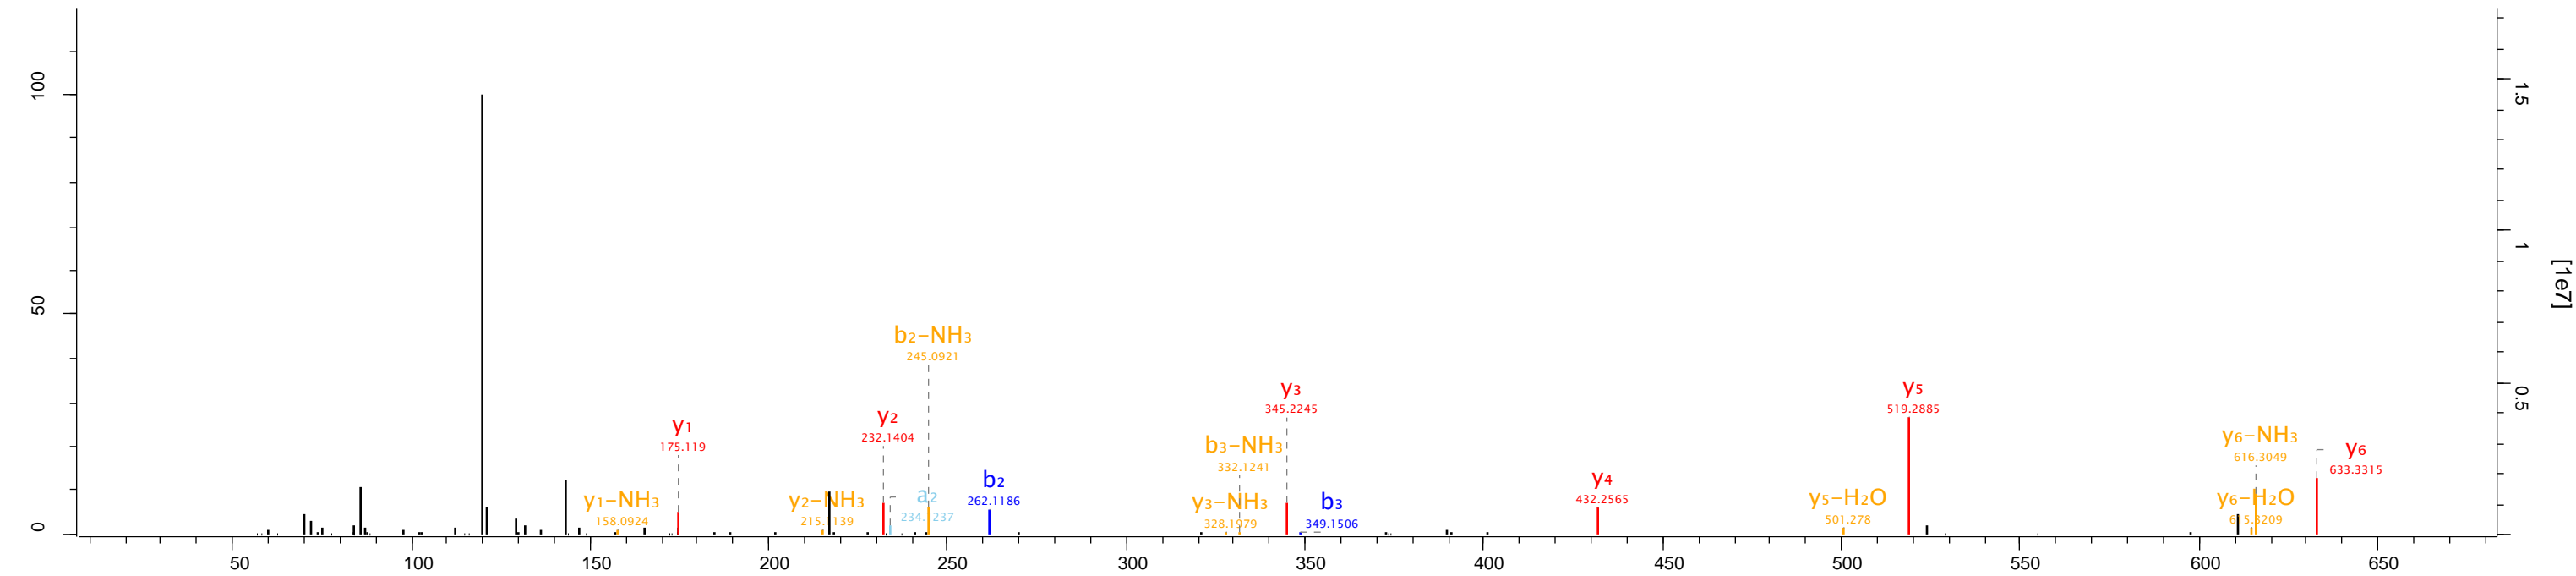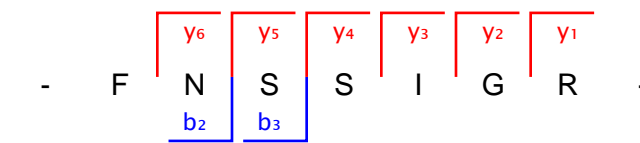

Raw file 20140827\_EXQ00\_FaHo\_SA\_RCO1\_02 Scan 7864 Method FTMS; HCD Score 147.33 m/z 639.34 Gene names RPL9A;RPL9B

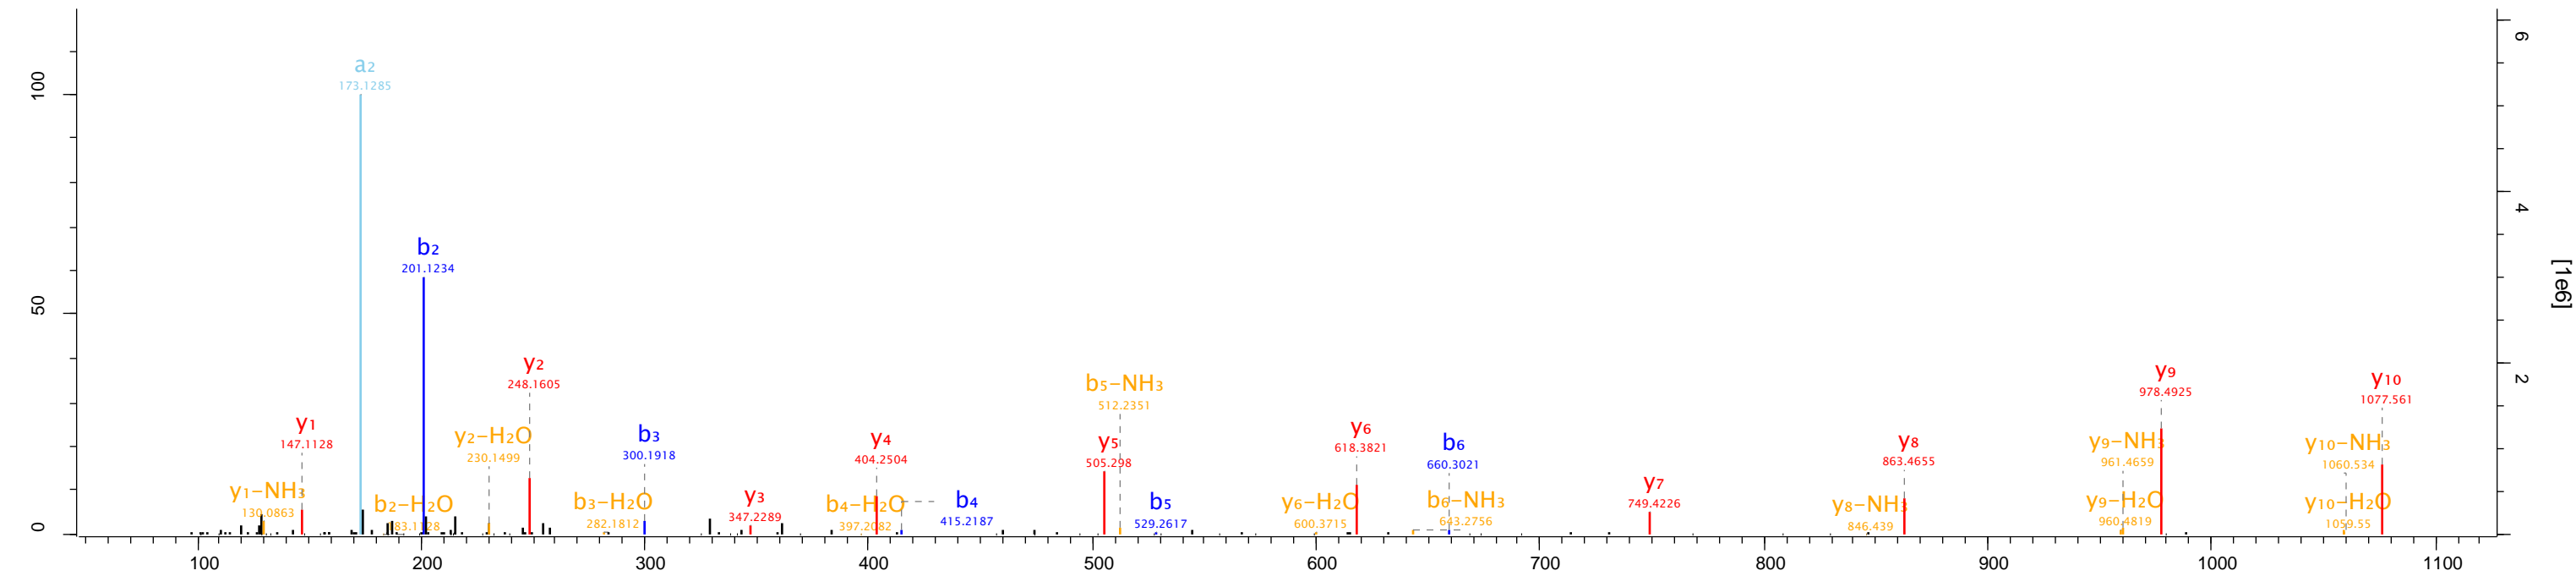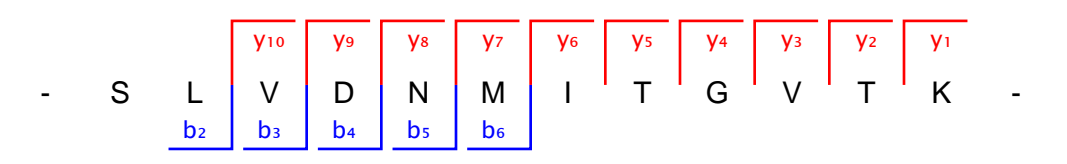

Raw file 20140827\_EXQ00\_FaHo\_SA\_RCO1\_02 Scan 8716 Method FTMS; HCD Score 155.87 m/z 1389.73 Gene names RPS0A;RPS0B

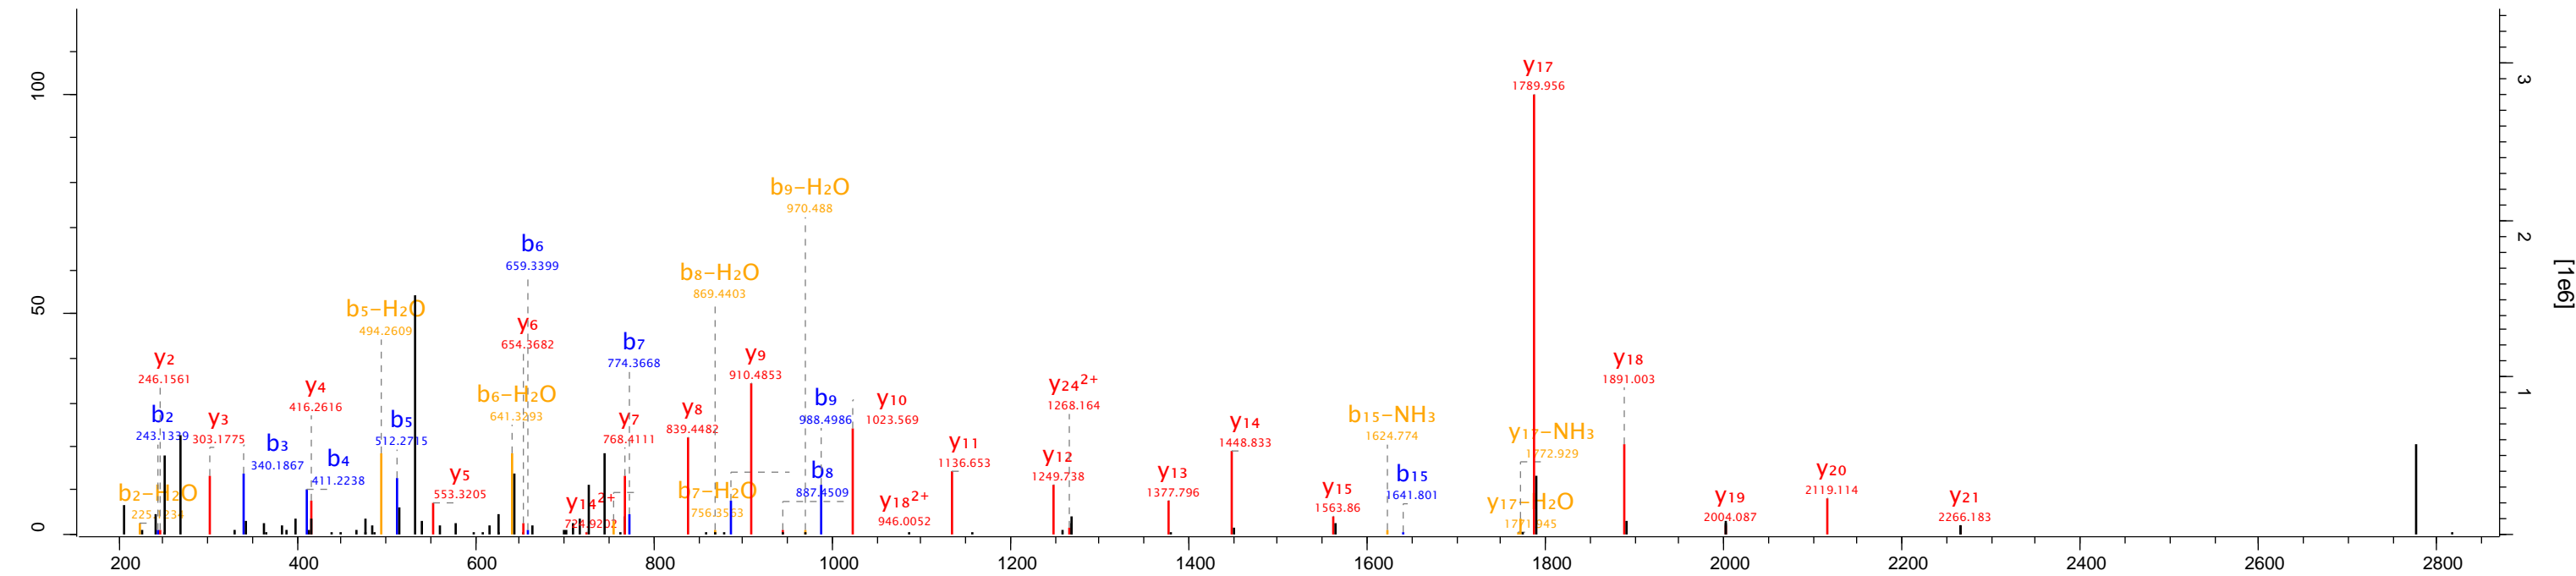

ac  
 - S L P A T F D L T P E D A Q L L L A A N T H L G A R -

Fragmentation sites are indicated by brackets above the sequence:

- Red brackets above: y24<sup>2+</sup> (P), y21 (F), y20 (D), y19 (L), y18 (T), y17 (P), y15 (D), y14 (A), y13 (Q), y12 (L), y11 (L), y10 (L), y9 (A), y8 (A), y7 (N), y6 (T), y5 (H), y4 (L), y3 (G), y2 (A)
- Blue brackets below: b2 (L), b3 (P), b4 (A), b5 (T), b6 (F), b7 (D), b8 (L), b9 (T), b15 (L)

Raw file: 20140827\_EXQ00\_FaHo\_SA\_RCO1\_03  
 Scan: 6831 Method: FTMS; HCD Score: 204.82 m/z: 822.94 Gene names: RPL17A;RPL17B

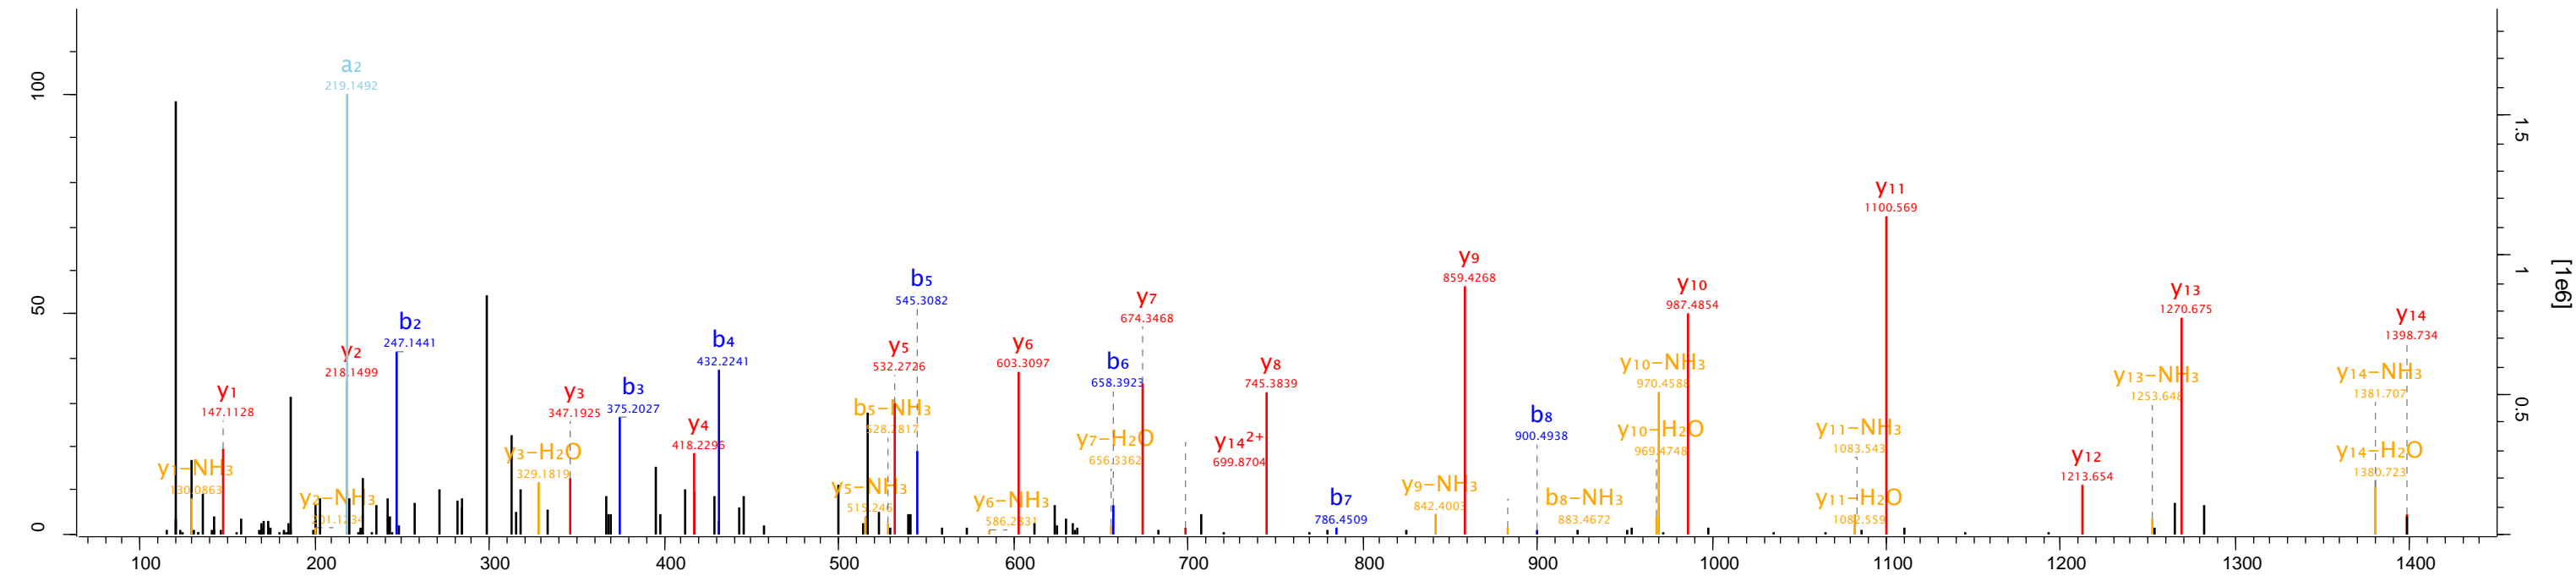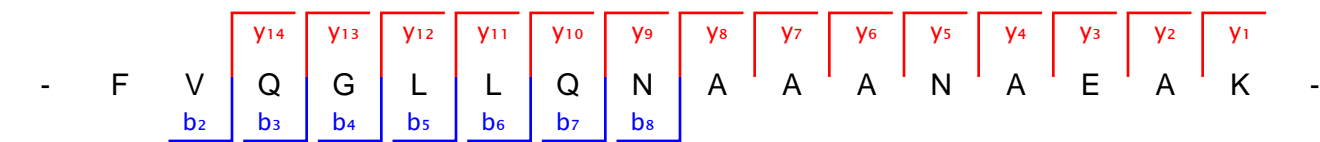

Raw file: 20140827\_EXQ00\_FaHo\_SA\_RSC2\_02  
 Scan: 3751 Method: FTMS; HCD Score: 92.47 m/z: 351.21 Gene names: RPL4B;RPL4A

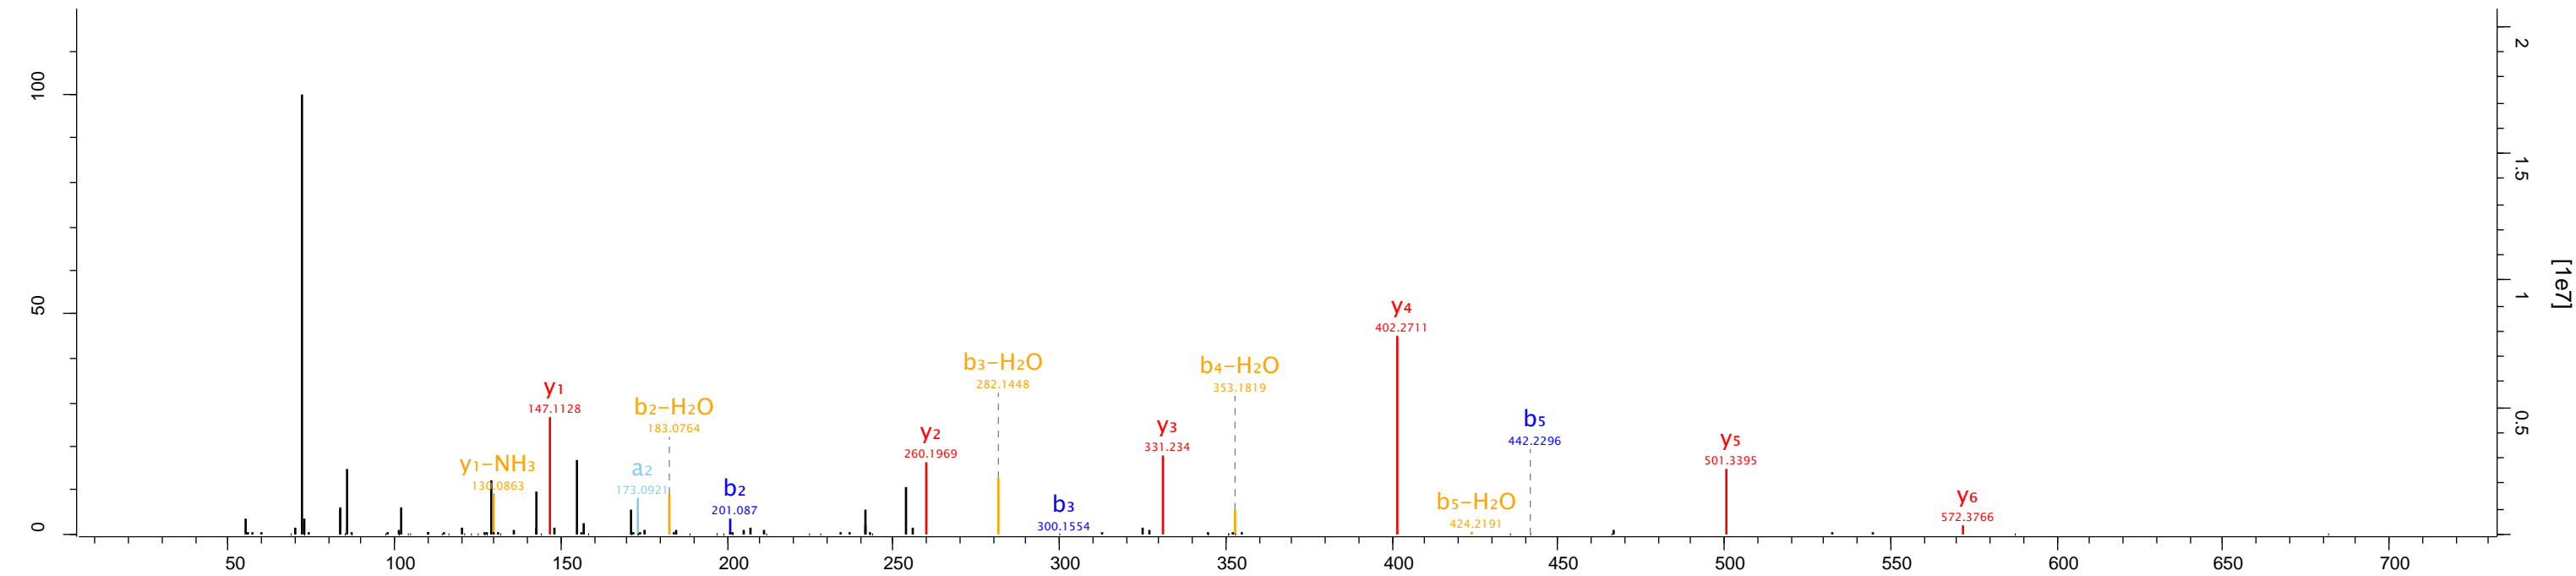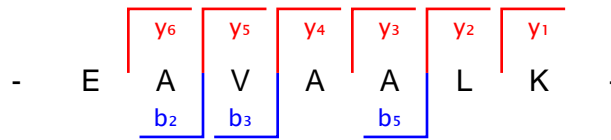

Raw file 20140827\_EXQ00\_FaHo\_SA\_RSC4\_01 Scan 2455 Method FTMS; HCD Score 56.63 m/z 375.52 Gene names AKL1

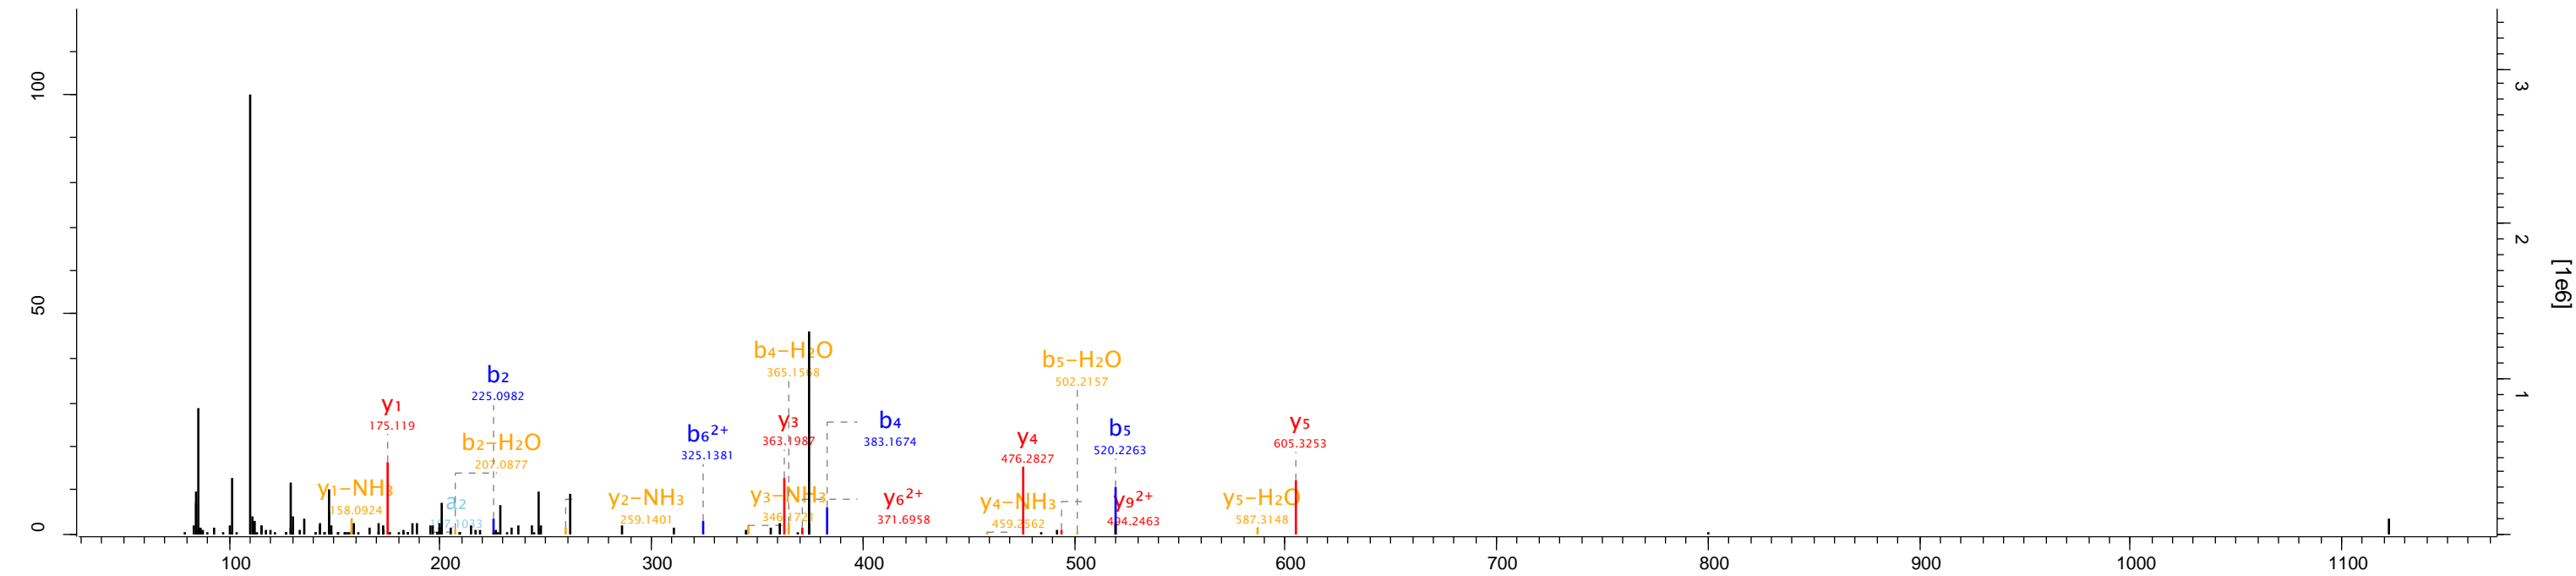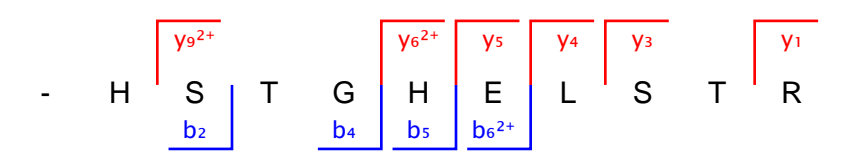



Raw file 20140827\_EXQ00\_FaHo\_SA\_RSC4\_02 Scan 5492 Method FTMS; HCD Score 58.98 m/z 919.43 Gene names CBP3

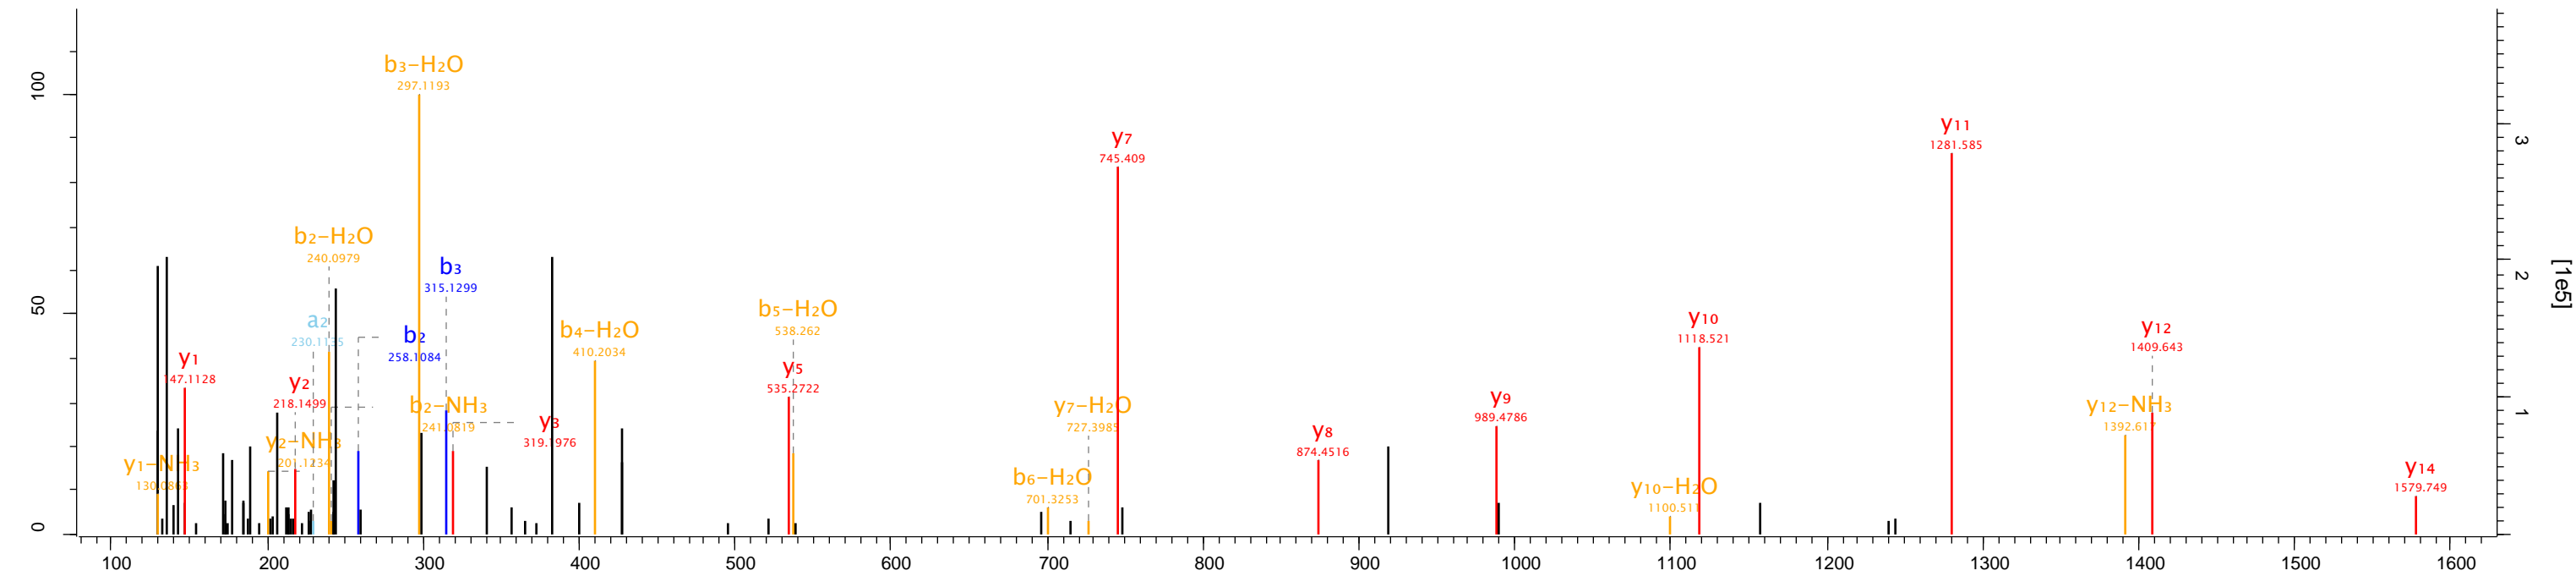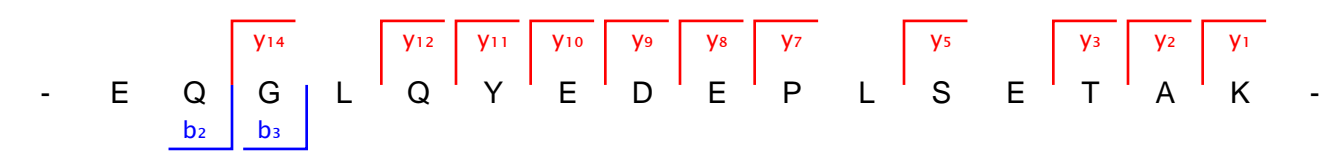

Raw file 20140827\_EXQ00\_FaHo\_SA\_RSC4\_02 Scan 7278 Method FTMS; HCD Score 79.92 m/z 859.67 Gene names LDB7

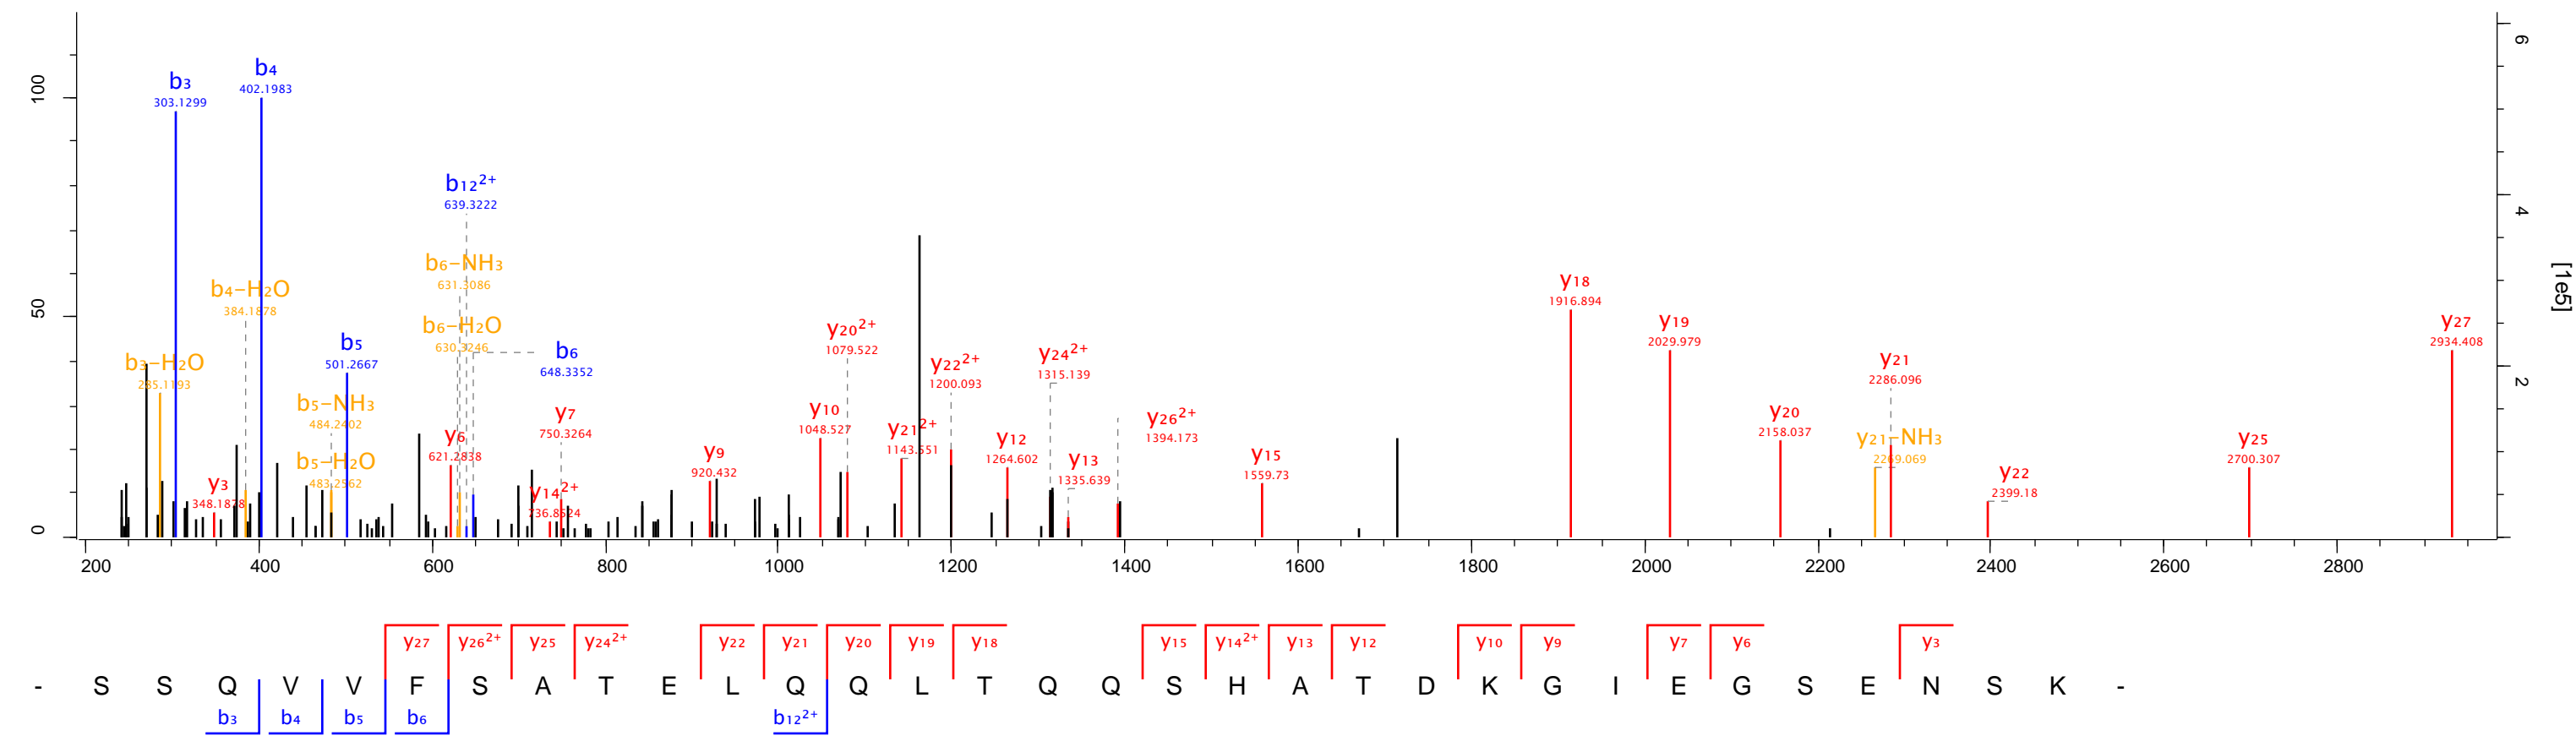

Raw file 20140827\_EXQ00\_FaHo\_SA\_RSC4\_02 Scan 7446 Method FTMS; HCD Score 114.5 m/z 478.31 Gene names RGR1

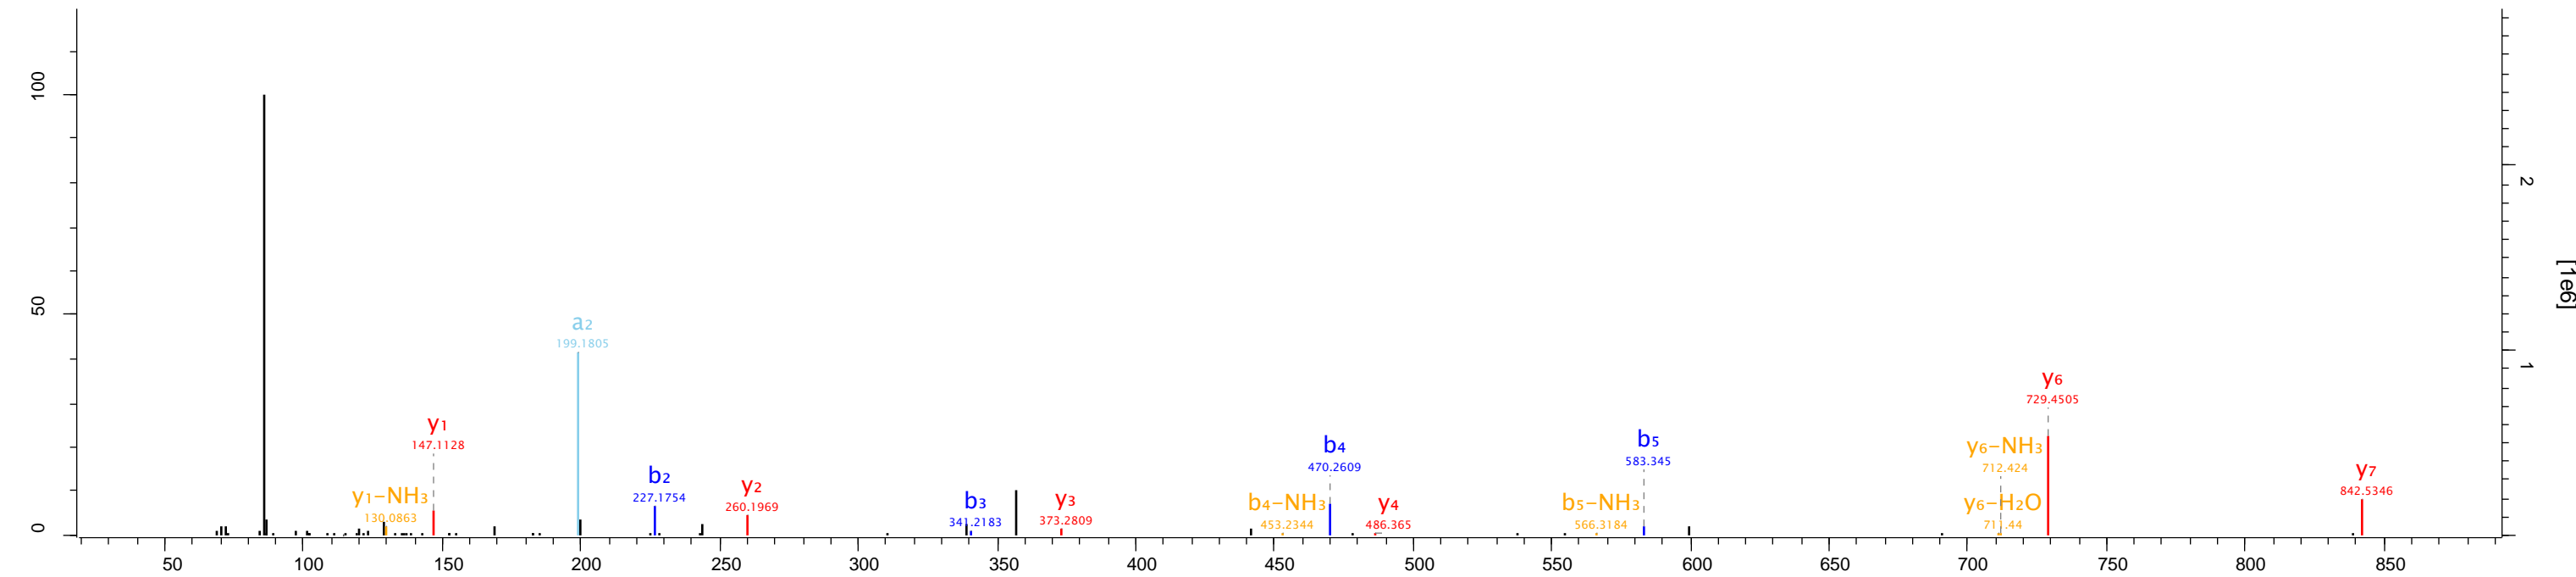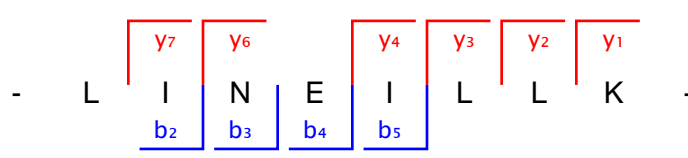

Raw file 20140827\_EXQ00\_FaHo\_SA\_RSC4\_03 Scan 7566 Method FTMS; HCD Score 184.87 m/z 777.93 Gene names RPL7A;RPL7B

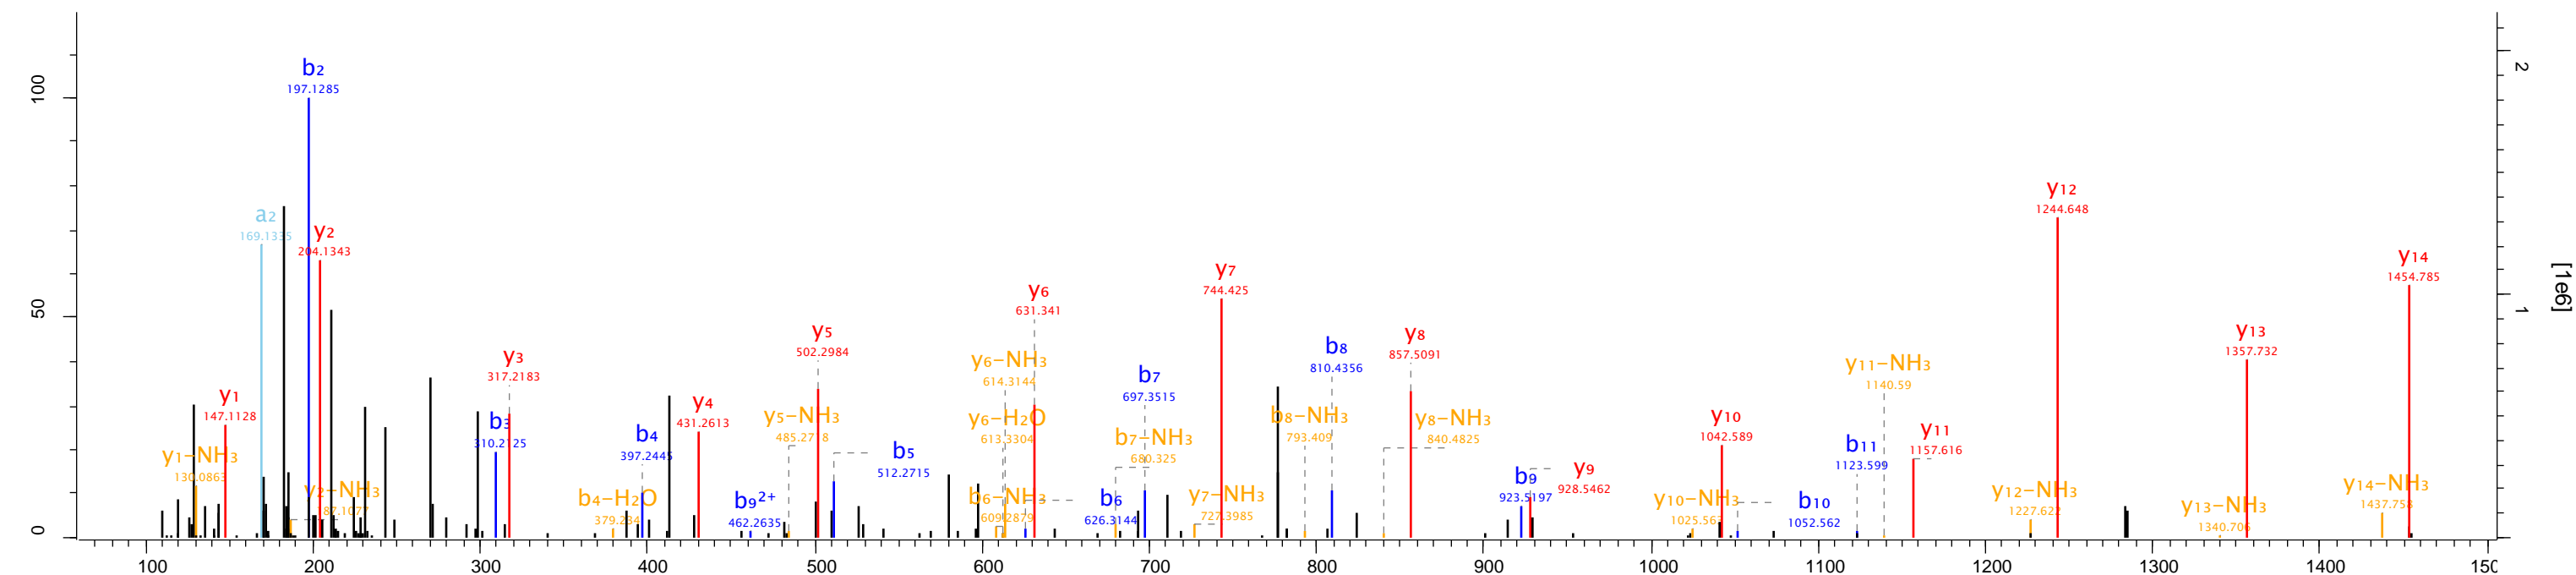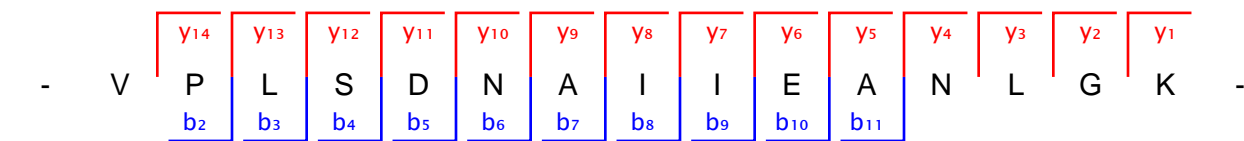

Raw file: 20140827\_EXQ00\_FaHo\_SA\_RSC4\_03  
 Scan: 8051 Method: FTMS; HCD Score: 67.4 m/z: 1009.5 Gene names: RPC10

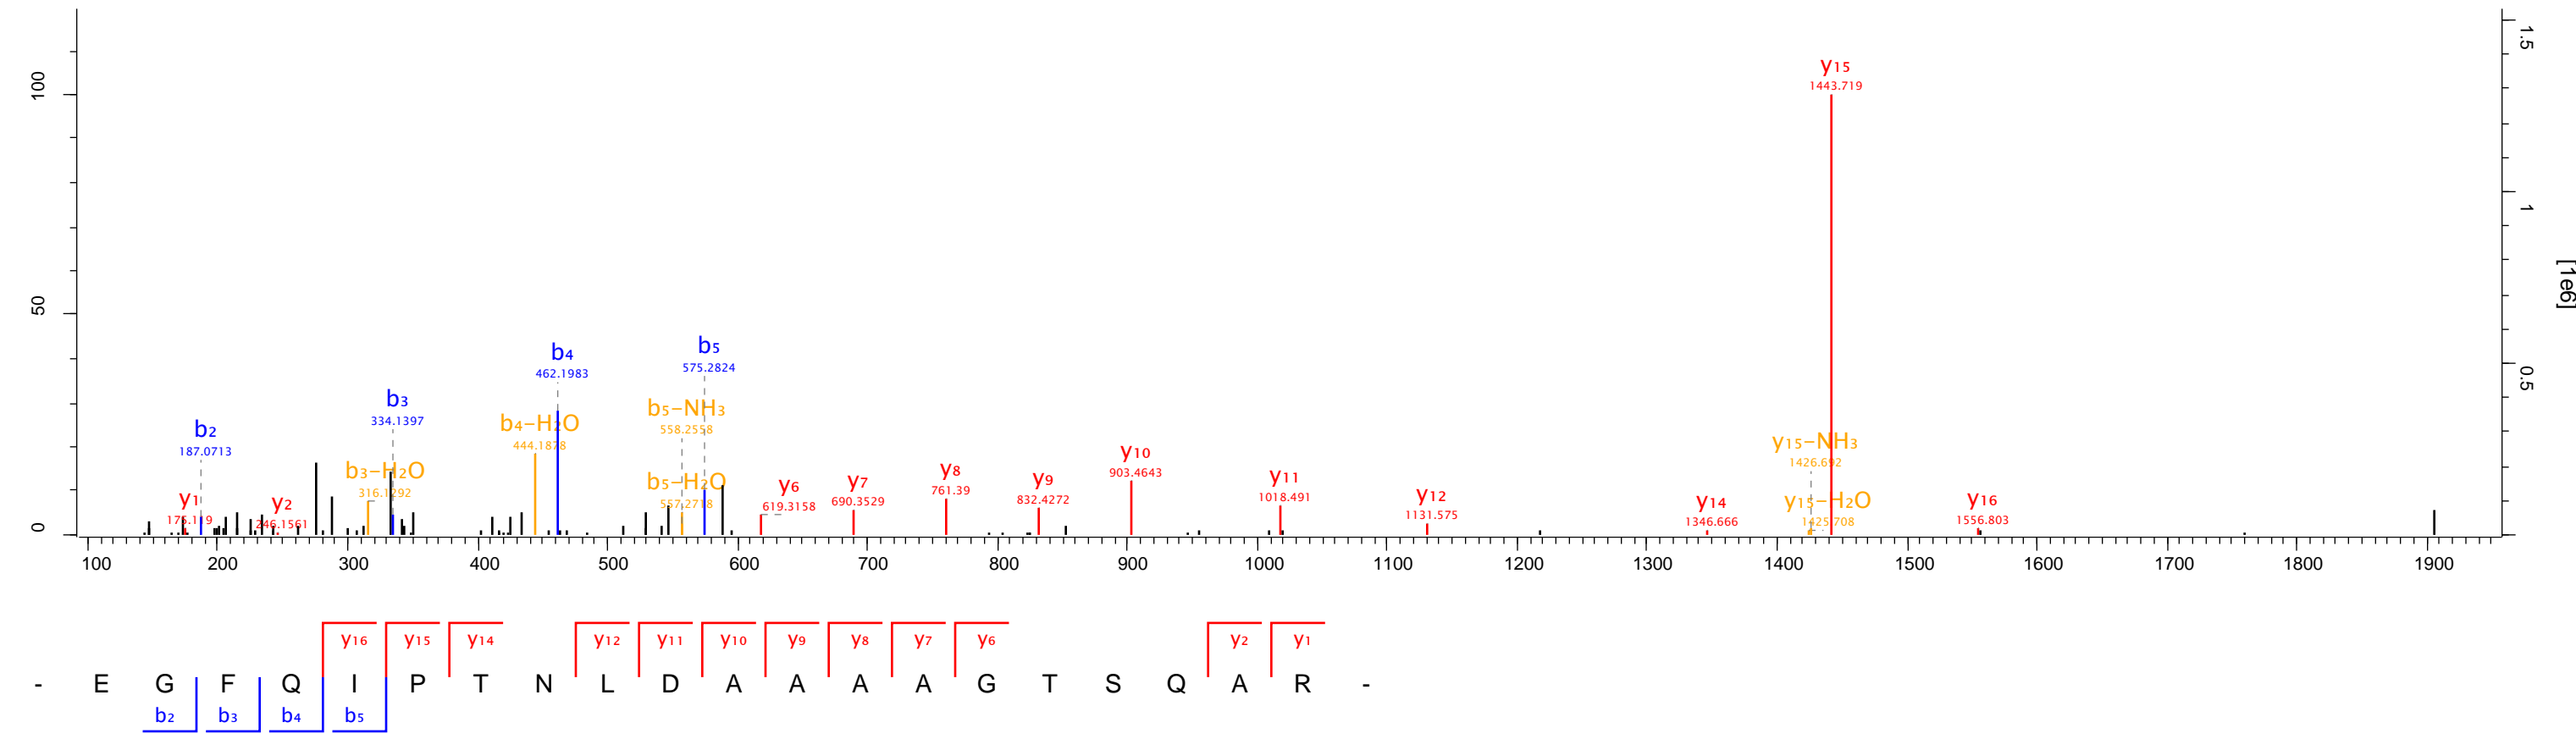

Raw file 20140827\_EXQ00\_FaHo\_SA\_RSC4\_03 Scan 8383 Method FTMS; HCD Score 70.41 m/z 808.94 Gene names ILV1

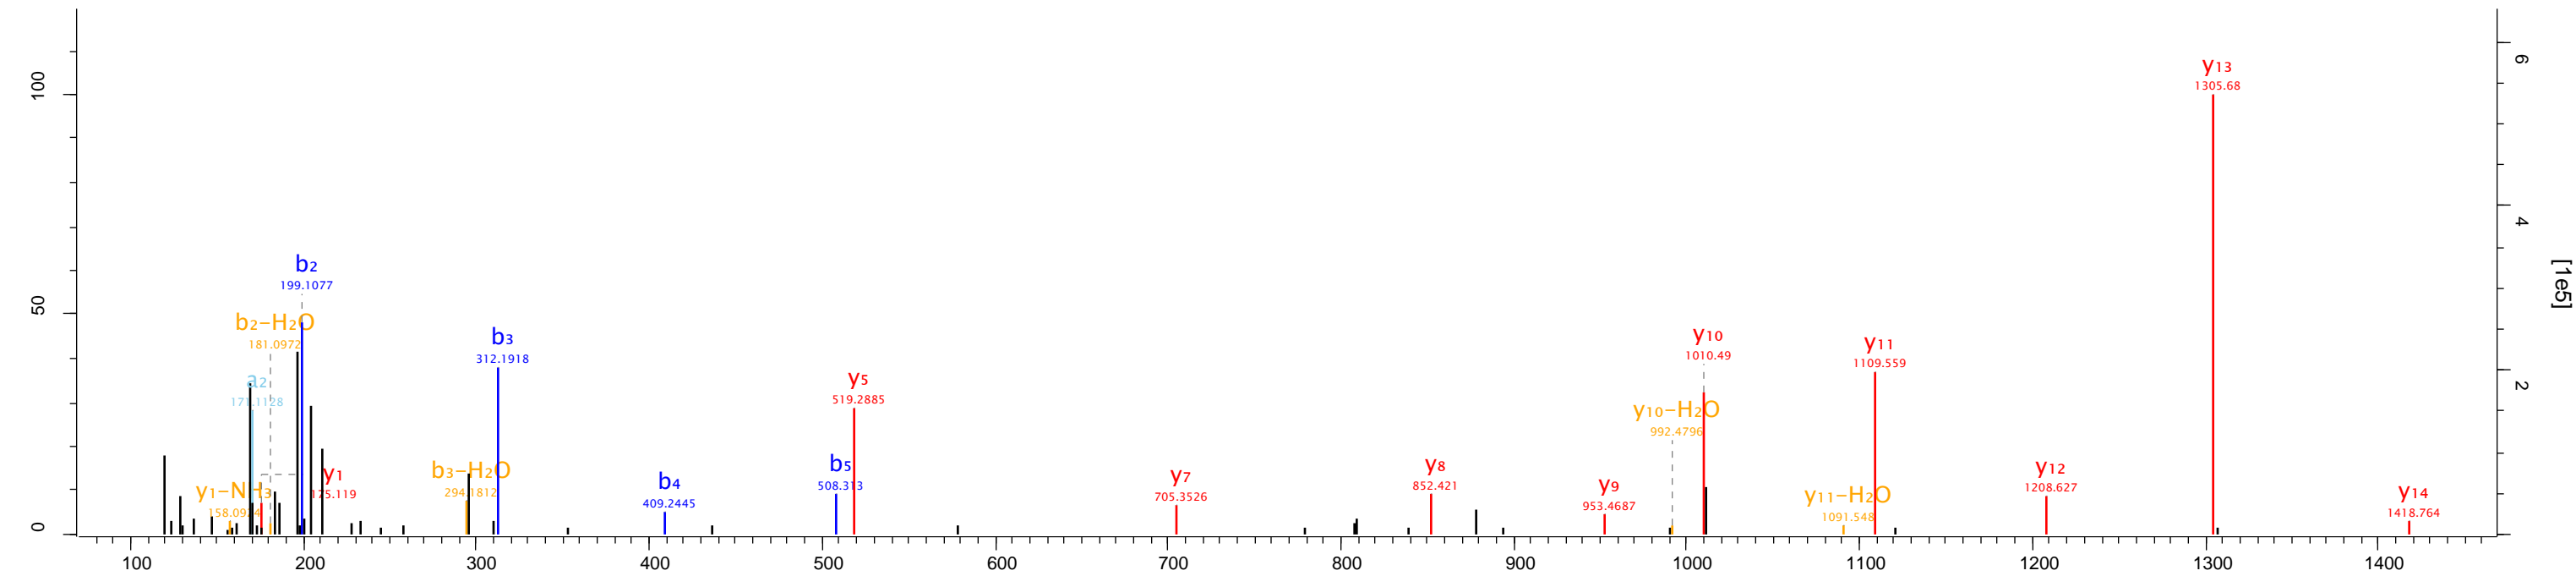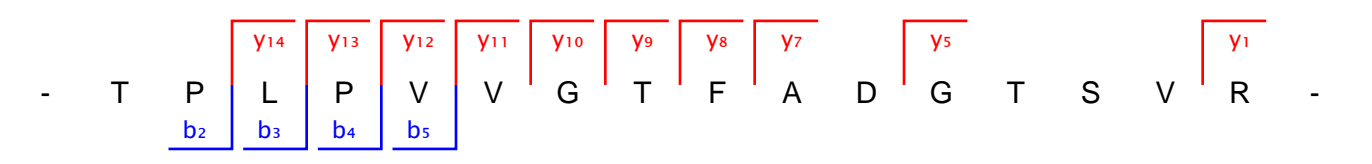

Raw file: 20140827\_EXQ00\_FaHo\_SA\_RSC8\_02  
 Scan: 7106 Method: FTMS; HCD Score: 58.89 m/z: 826.43 Gene names: CHD1

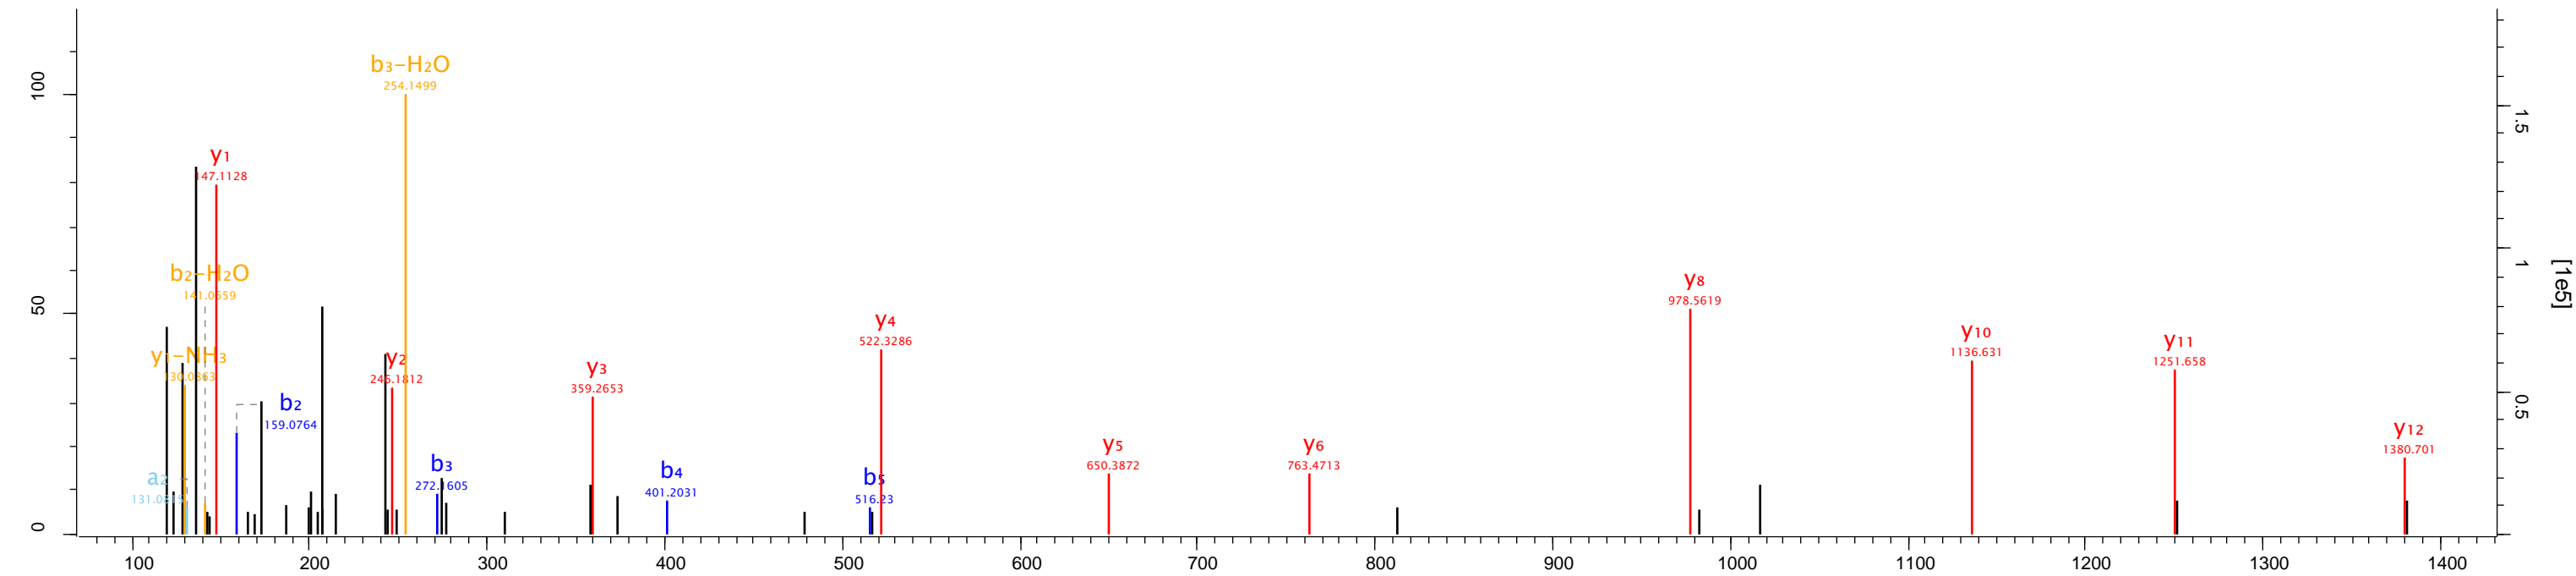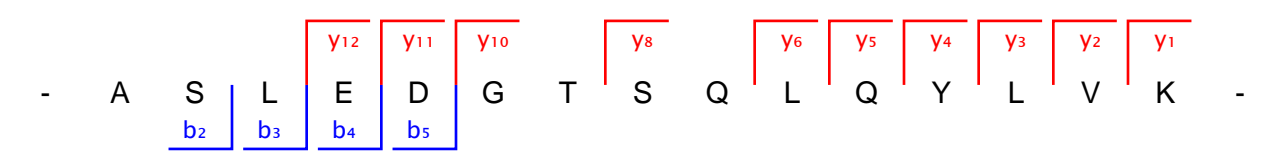

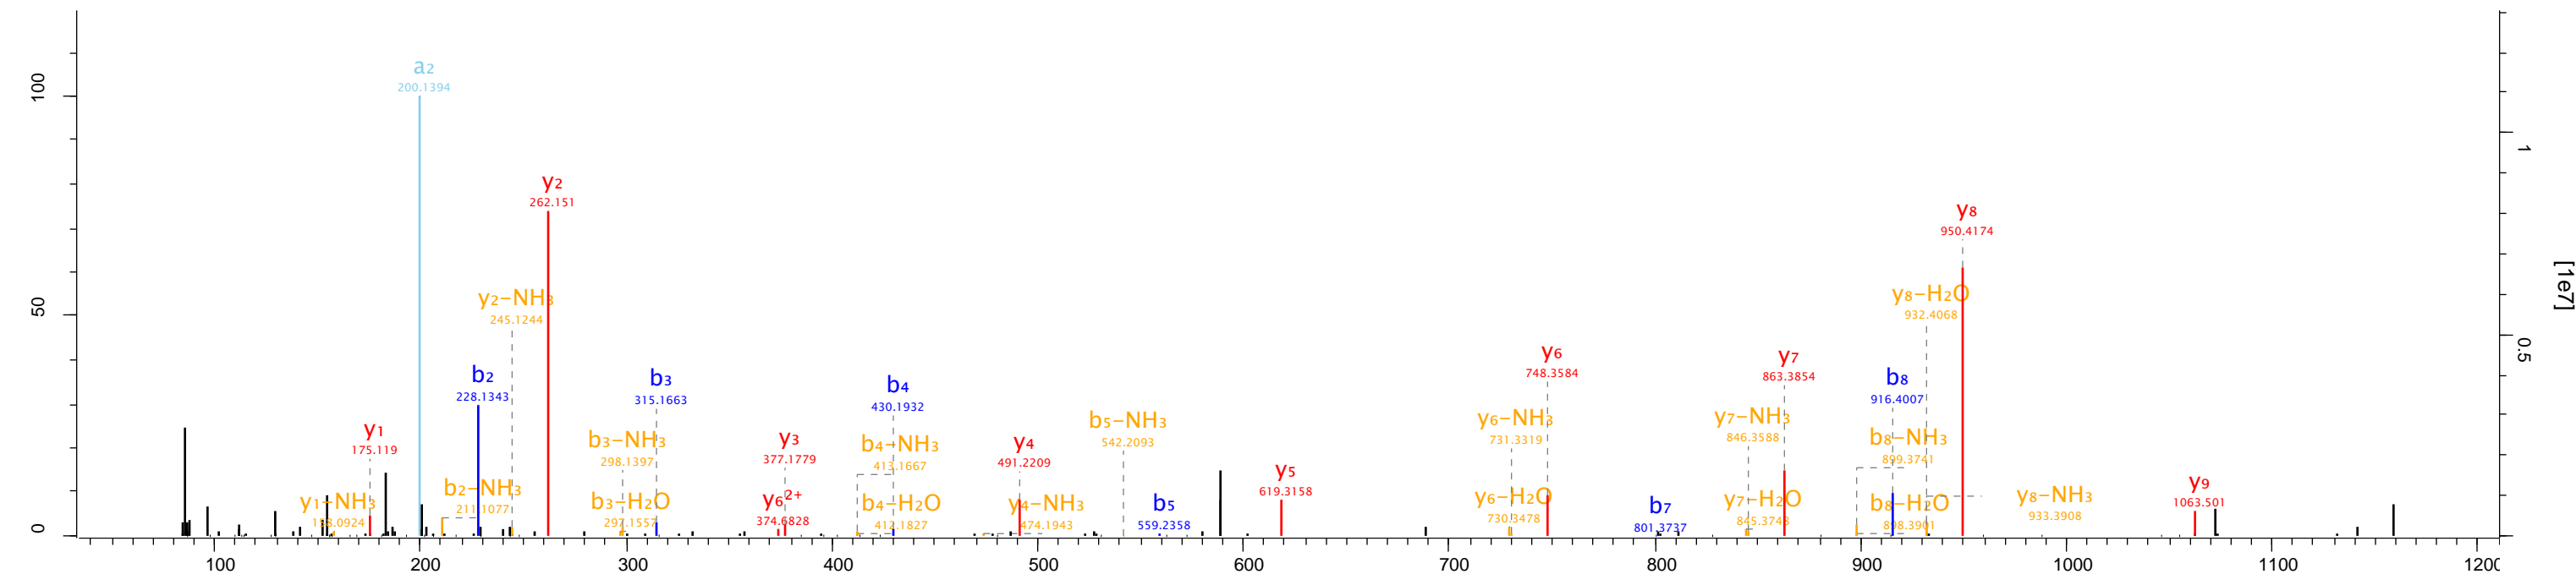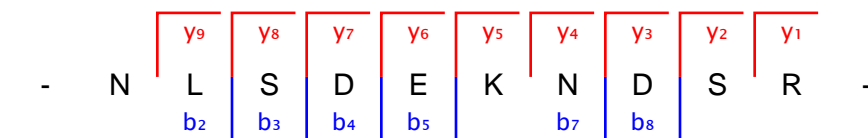



Raw file: 20140827\_EXQ00\_FaHo\_SA\_SET1\_01  
 Scan: 3363 Method: FTMS; HCD Score: 102.53 m/z: 465.78 Gene names: RPL4B;RPL4A

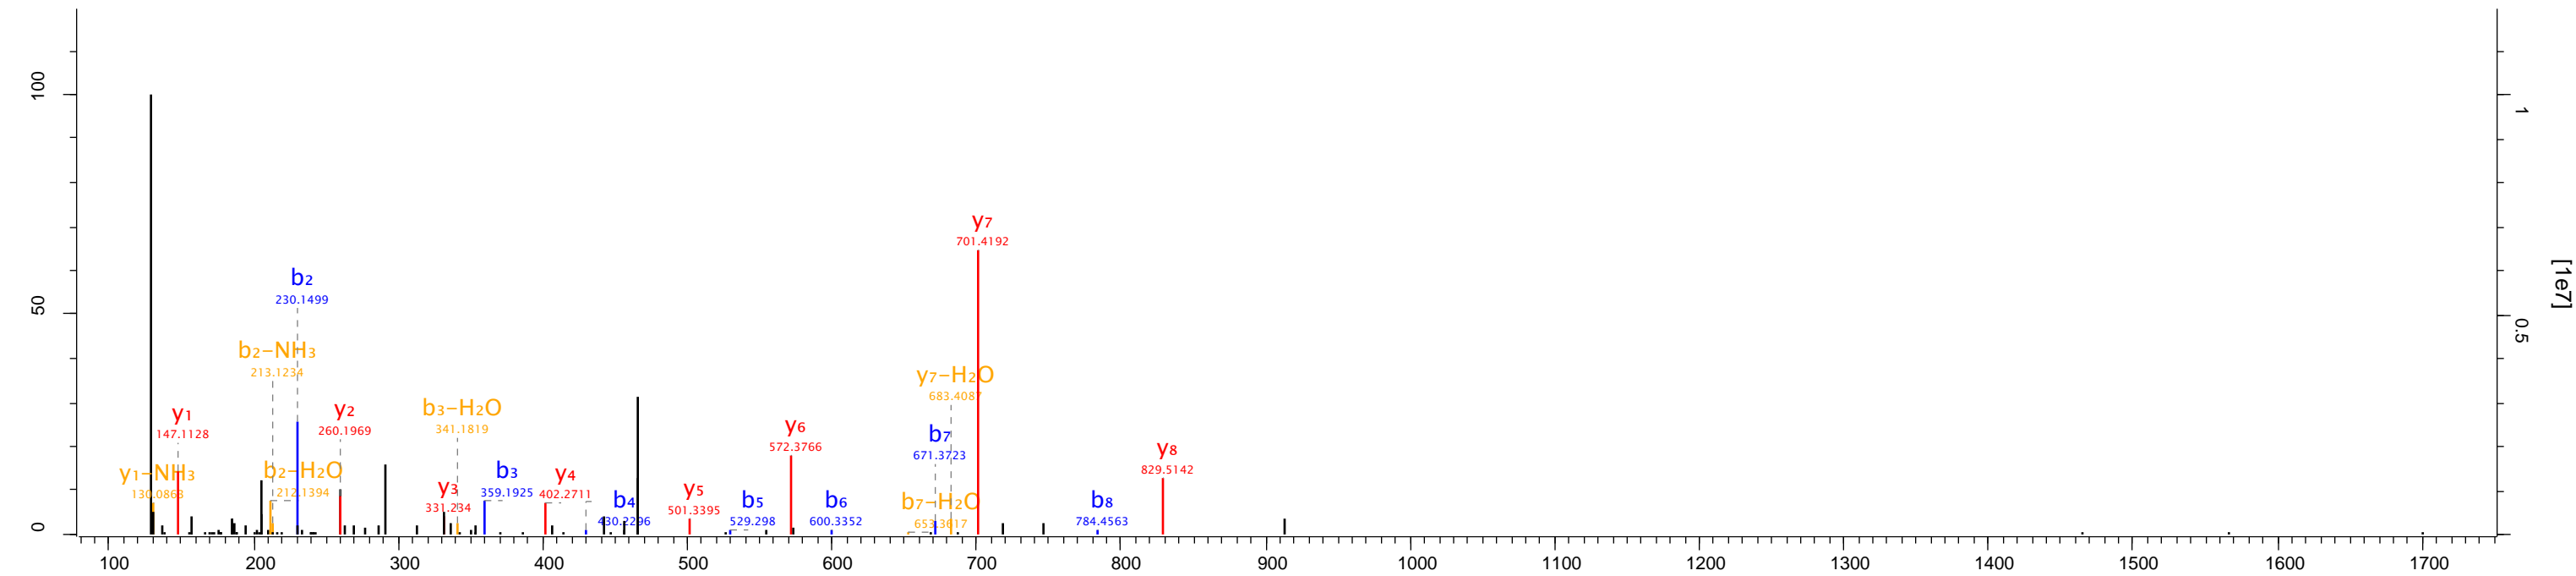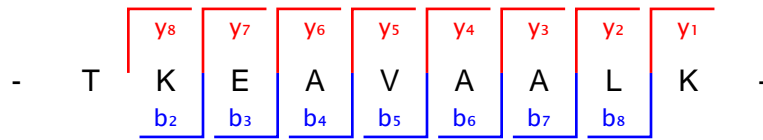

Raw file 20140827\_EXQ00\_FaHo\_SA\_SET1\_02 Scan 2231 Method FTMS; HCD Score 71.08 m/z 504.75 Gene names YDL121C

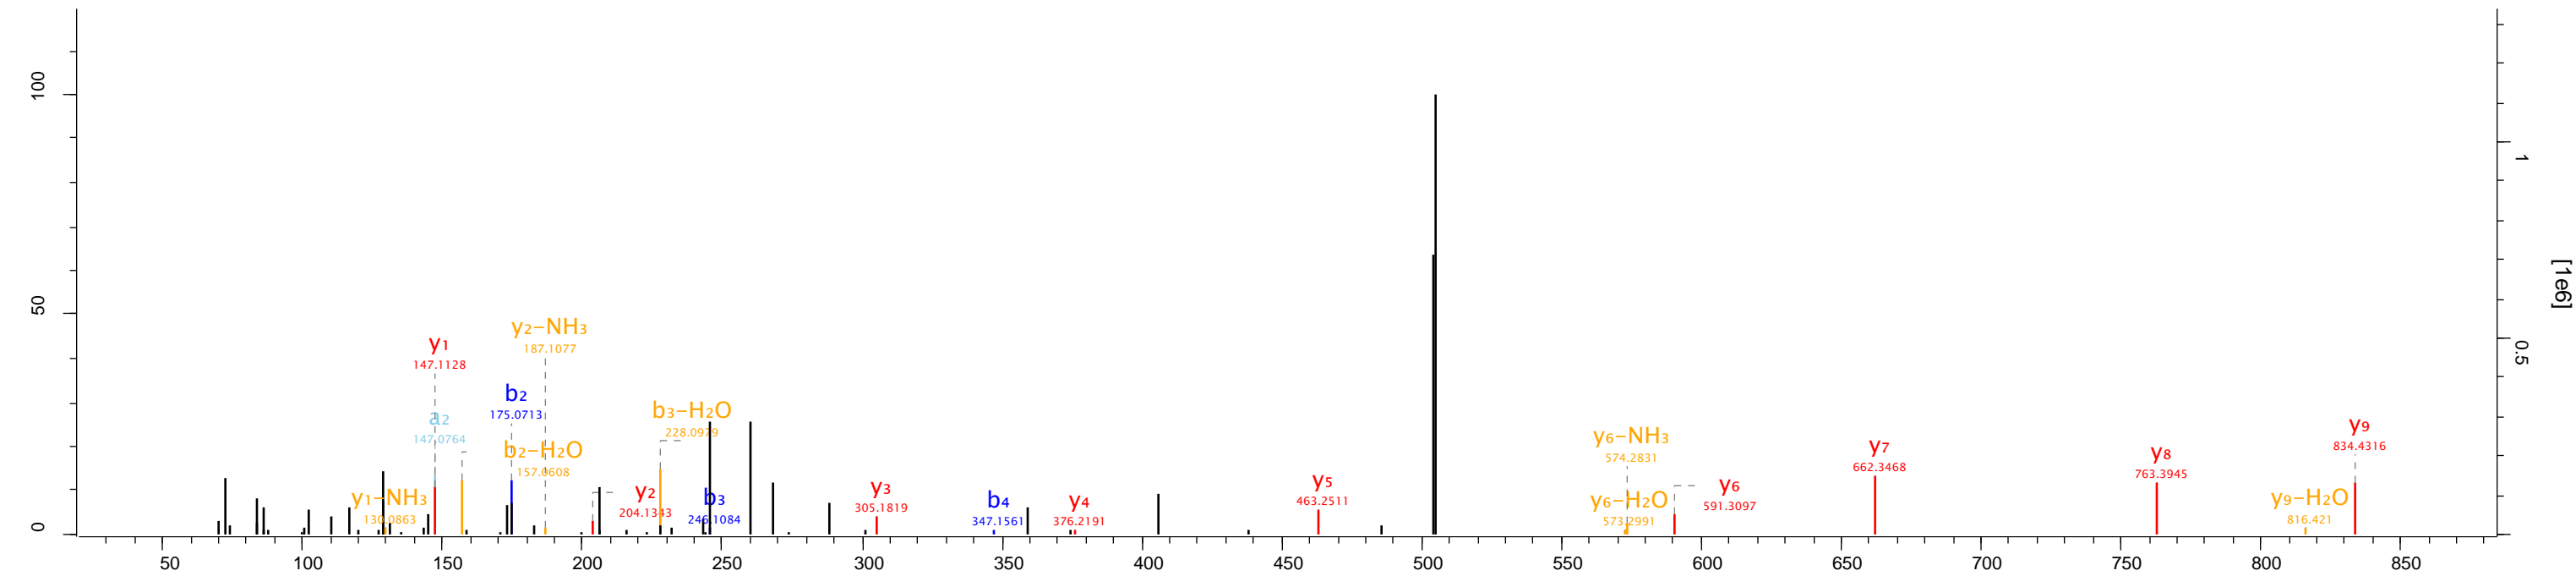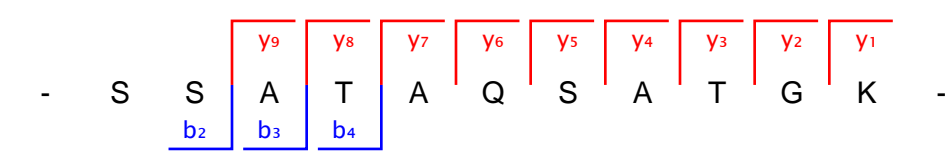

Raw file: 20140827\_EXQ00\_FaHo\_SA\_SET1\_02  
 Scan: 4701 Method: FTMS; HCD Score: 116.25 m/z: 510.24 Gene names: ARF1;ARF2

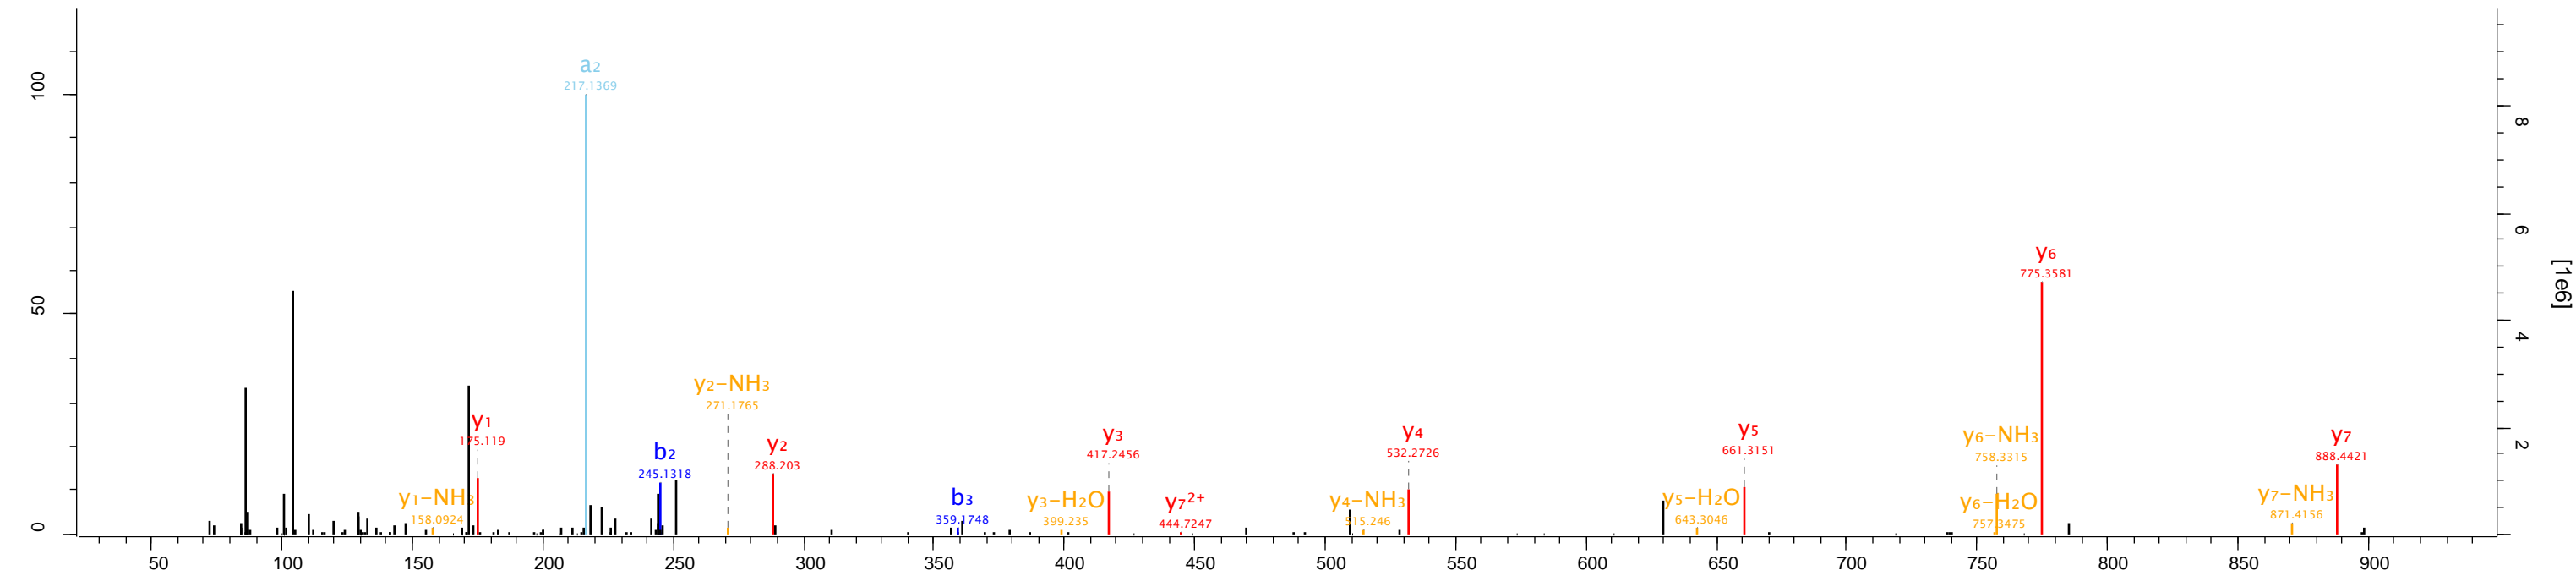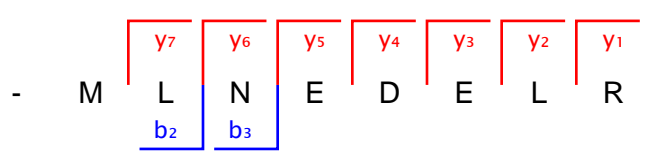

Raw file: 20140827\_EXQ00\_FaHo\_SA\_SET1\_02  
 Scan: 4743 Method: FTMS; HCD Score: 99.14 m/z: 458.78 Gene names: RPL21A;RPL21B

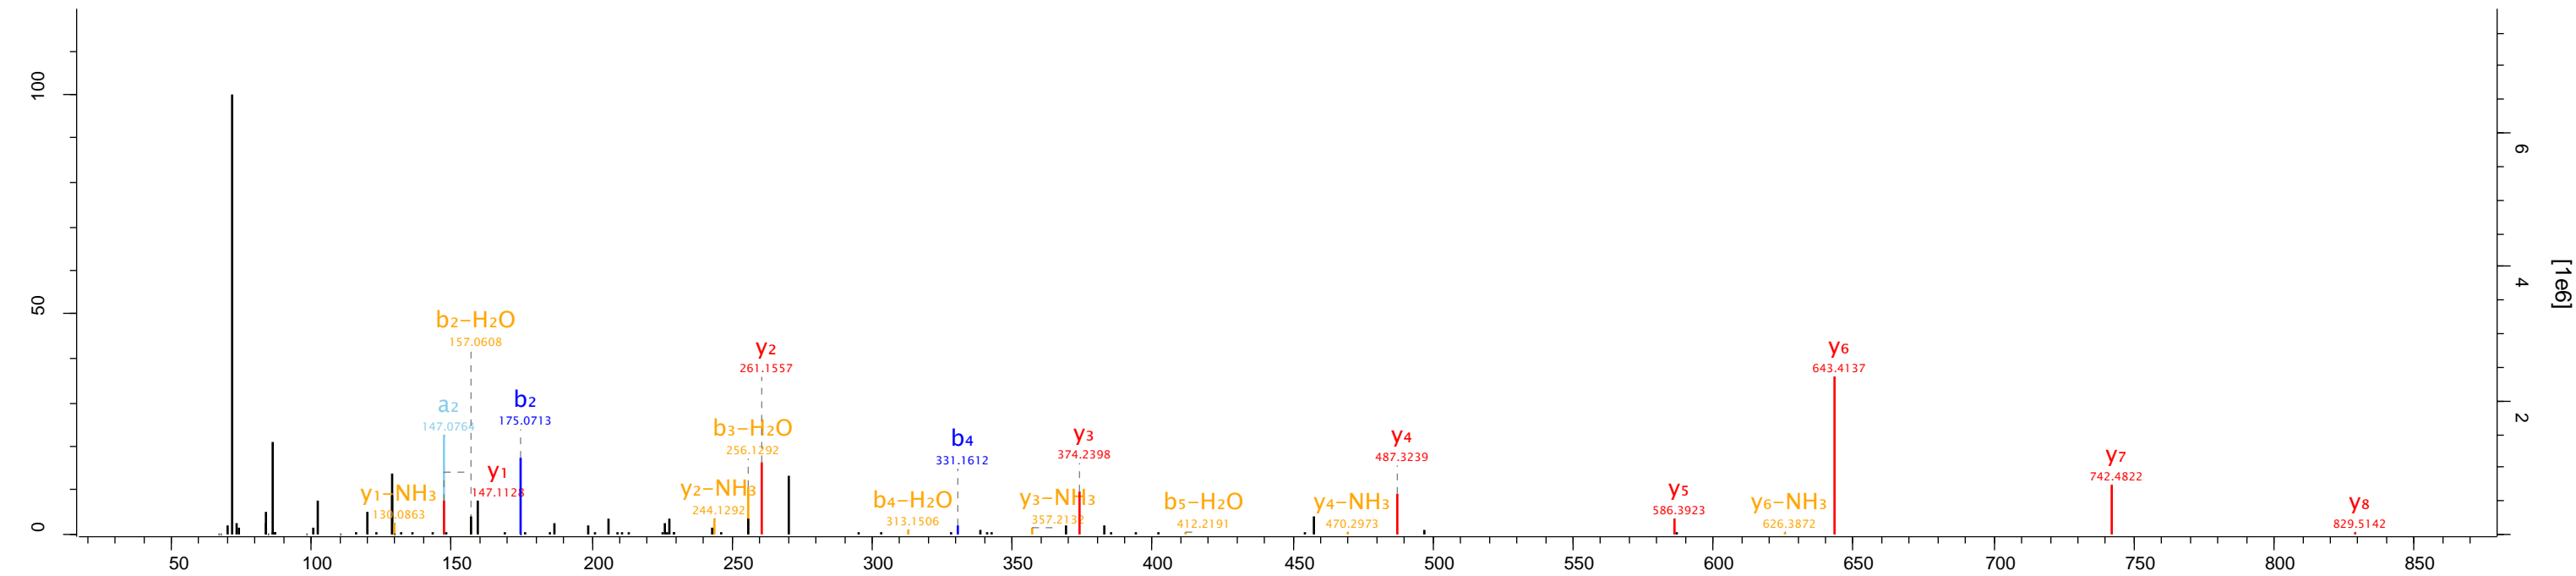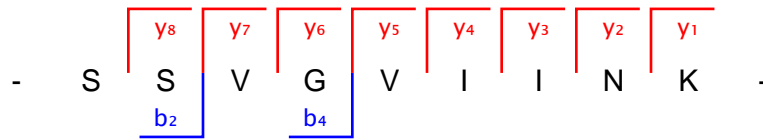

Raw file 20140827\_EXQ00\_FaHo\_SA\_SET1\_02 Scan 5179 Method FTMS; HCD Score 68 m/z 674.83 Gene names SSP120

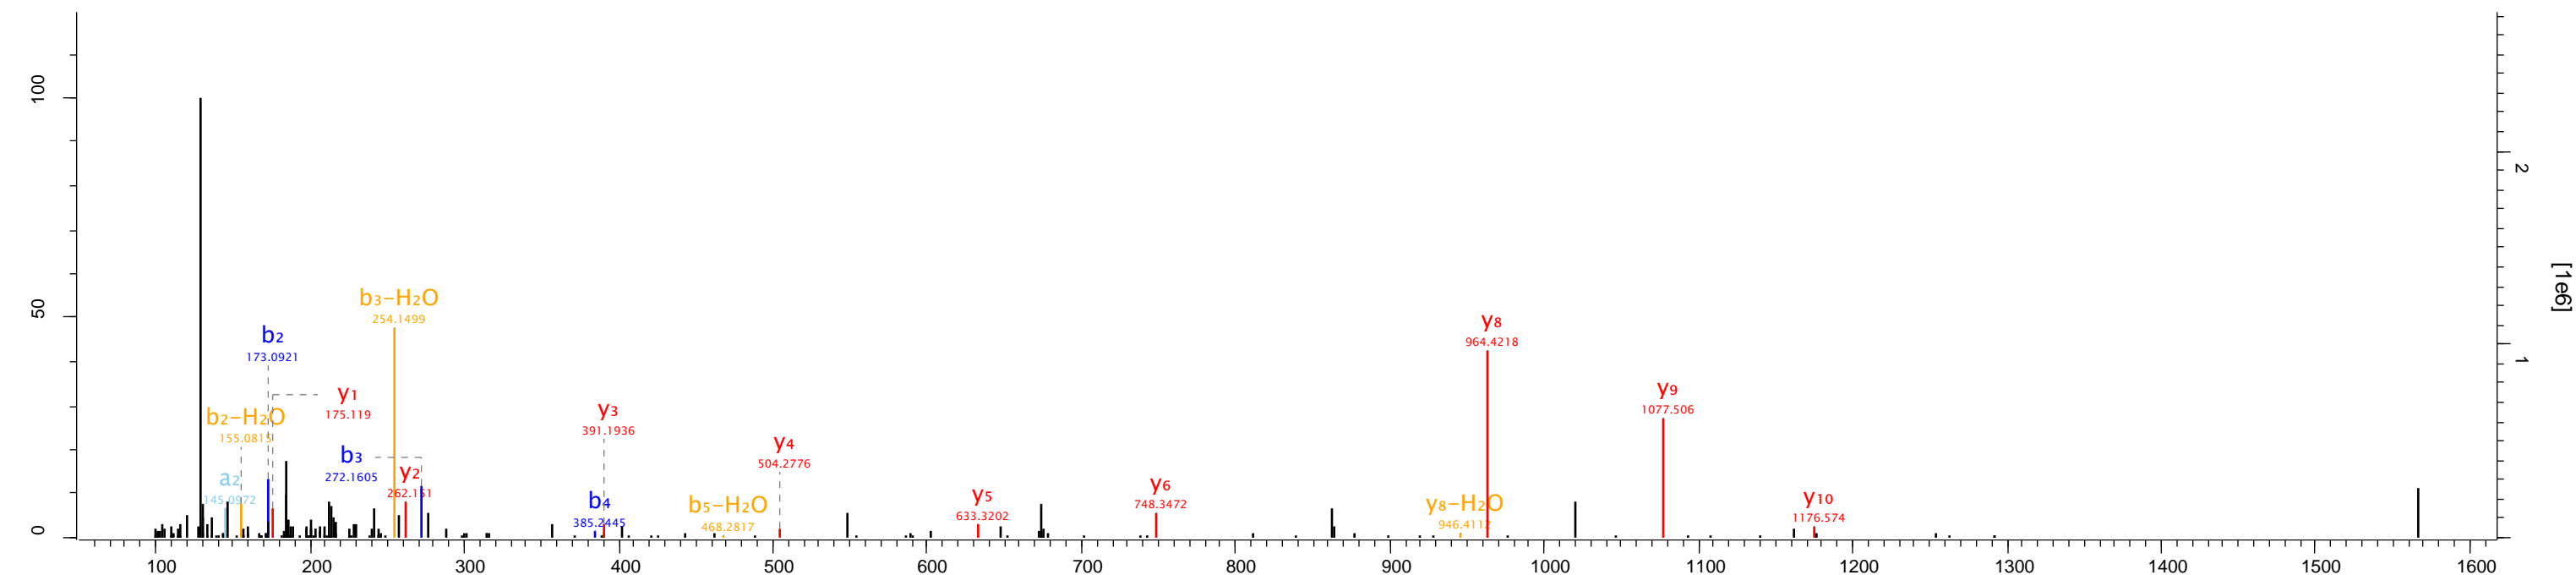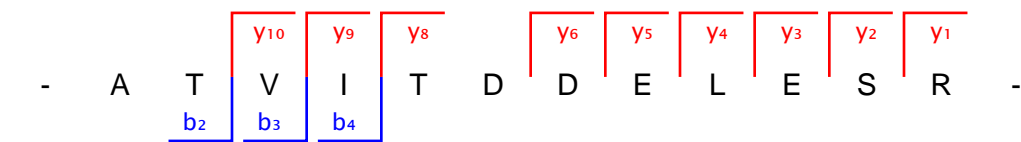

Raw file: 20140827\_EXQ00\_FaHo\_SA\_SET1\_02  
 Scan: 5590 Method: FTMS; HCD Score: 71.03 m/z: 606.84 Gene names: CPR6

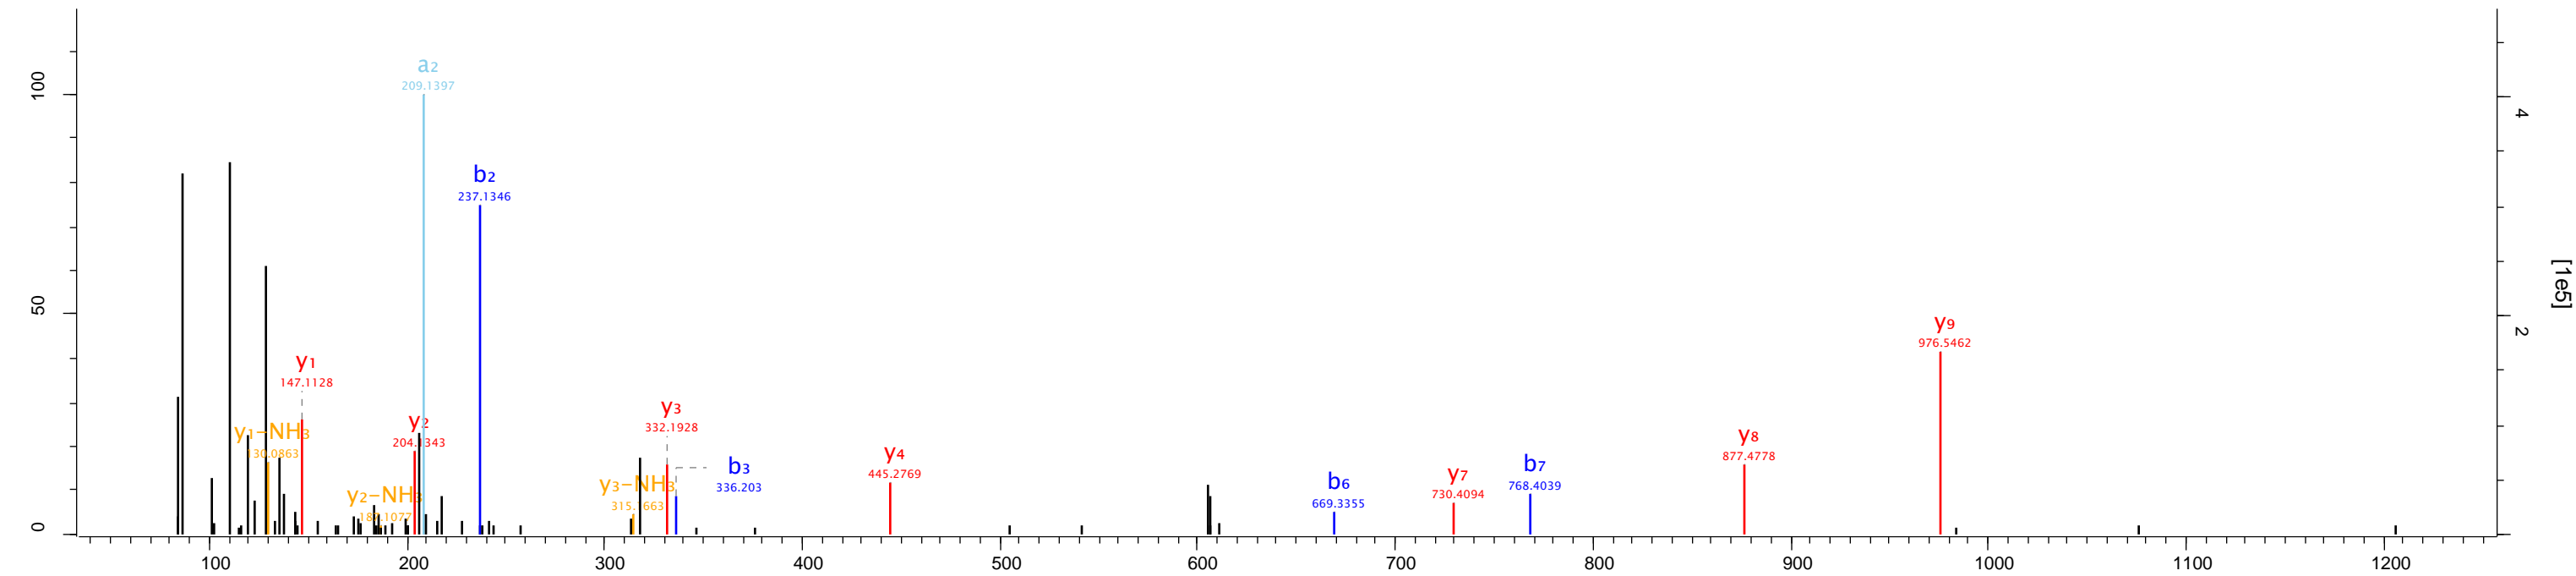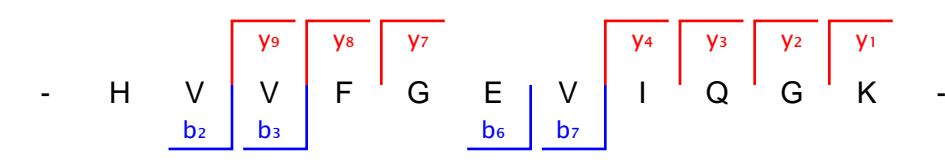

Raw file: 20140827\_EXQ00\_FaHo\_SA\_SET1\_02  
 Scan: 5601 Method: FTMS; HCD Score: 61.26 m/z: 783.87 Gene names: TOM40

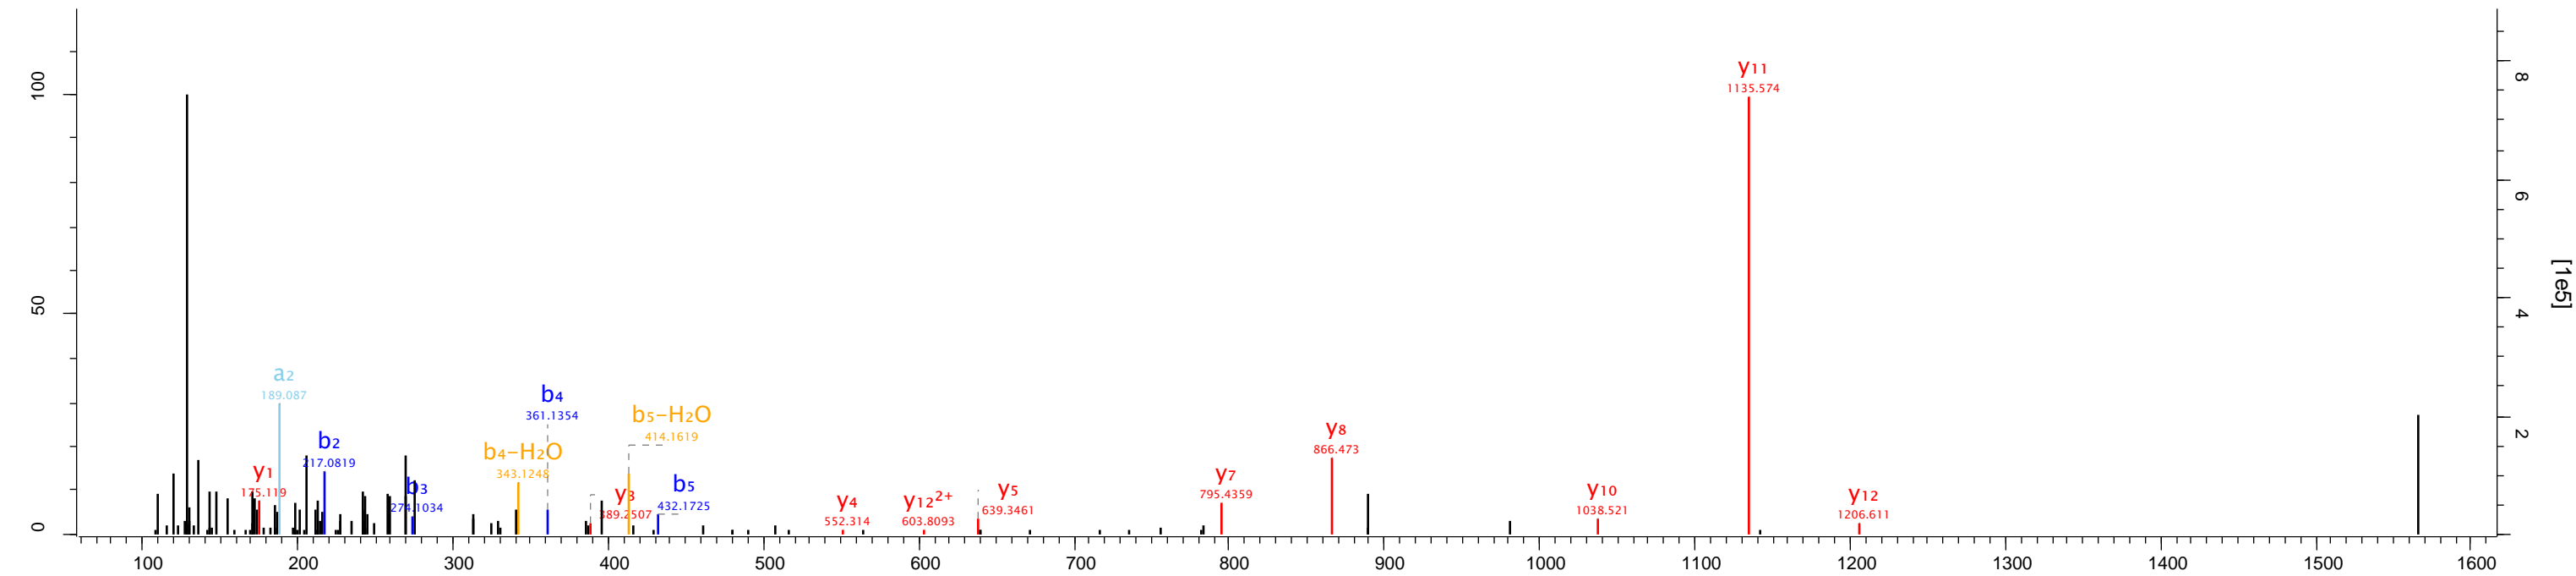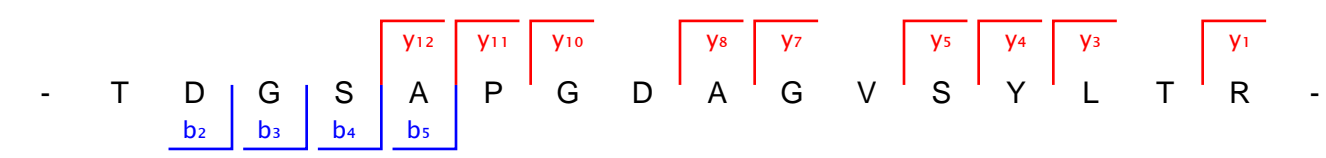

Raw file: 20140827\_EXQ00\_FaHo\_SA\_SET1\_02  
 Scan: 7268 Method: FTMS; HCD Score: 59.91 m/z: 515.28 Gene names: TUB1

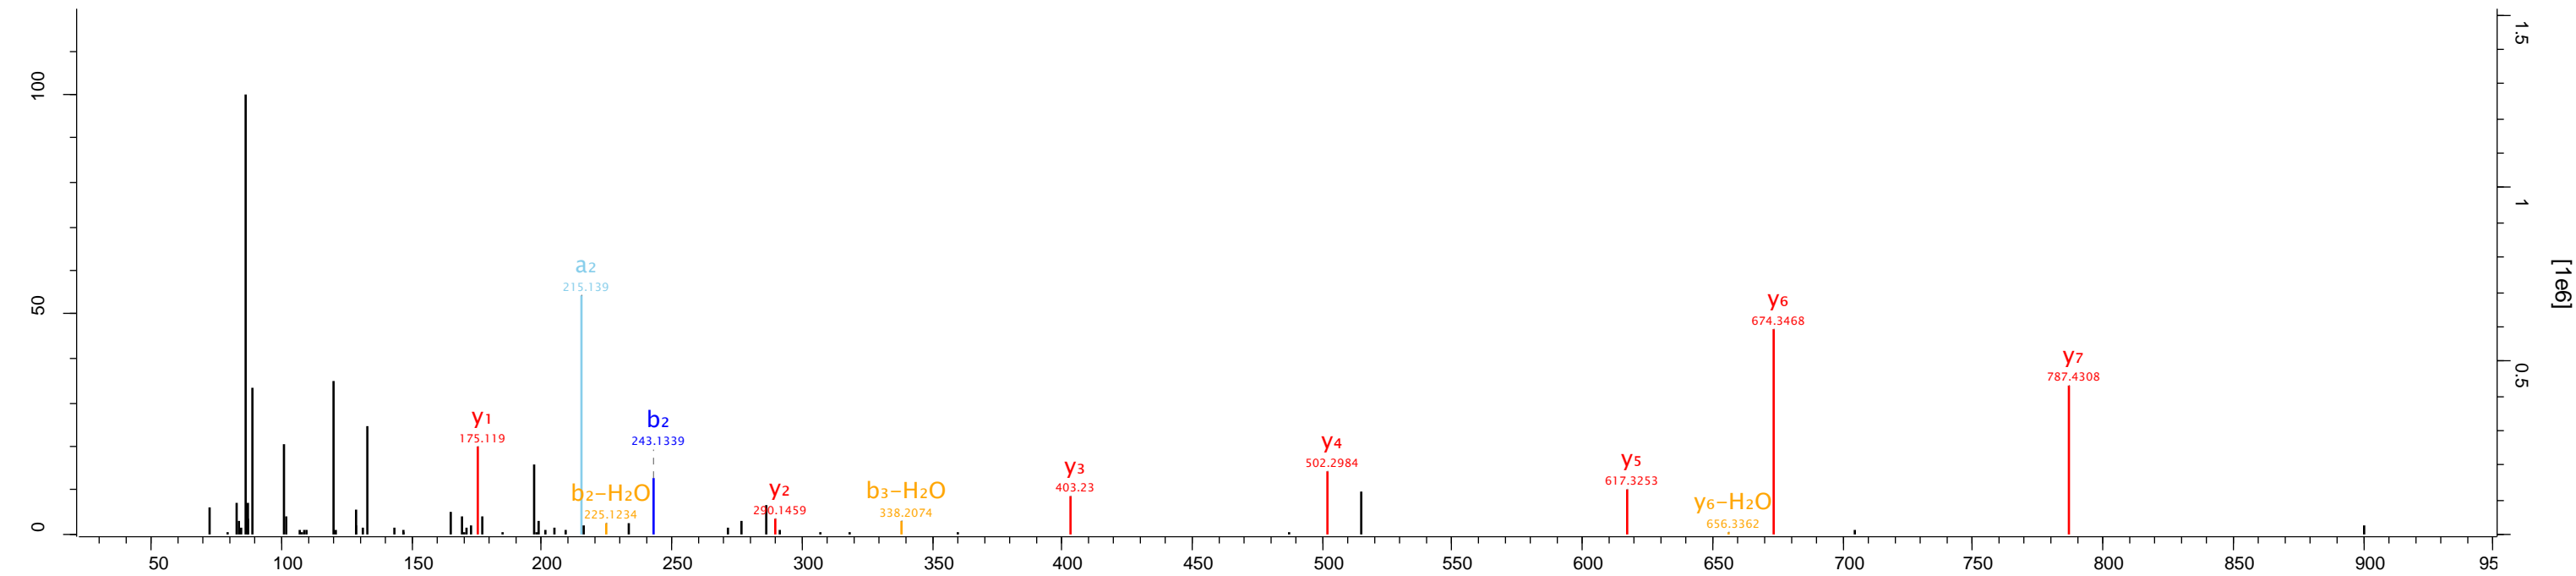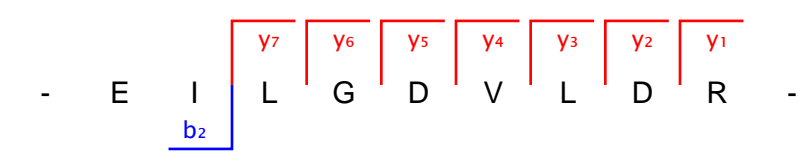



Raw file 20140827\_EXQ00\_FaHo\_SA\_SET1\_02 Scan 8537 Method FTMS; HCD Score 132.64 m/z 941.03 Gene names RPL4B;RPL4A

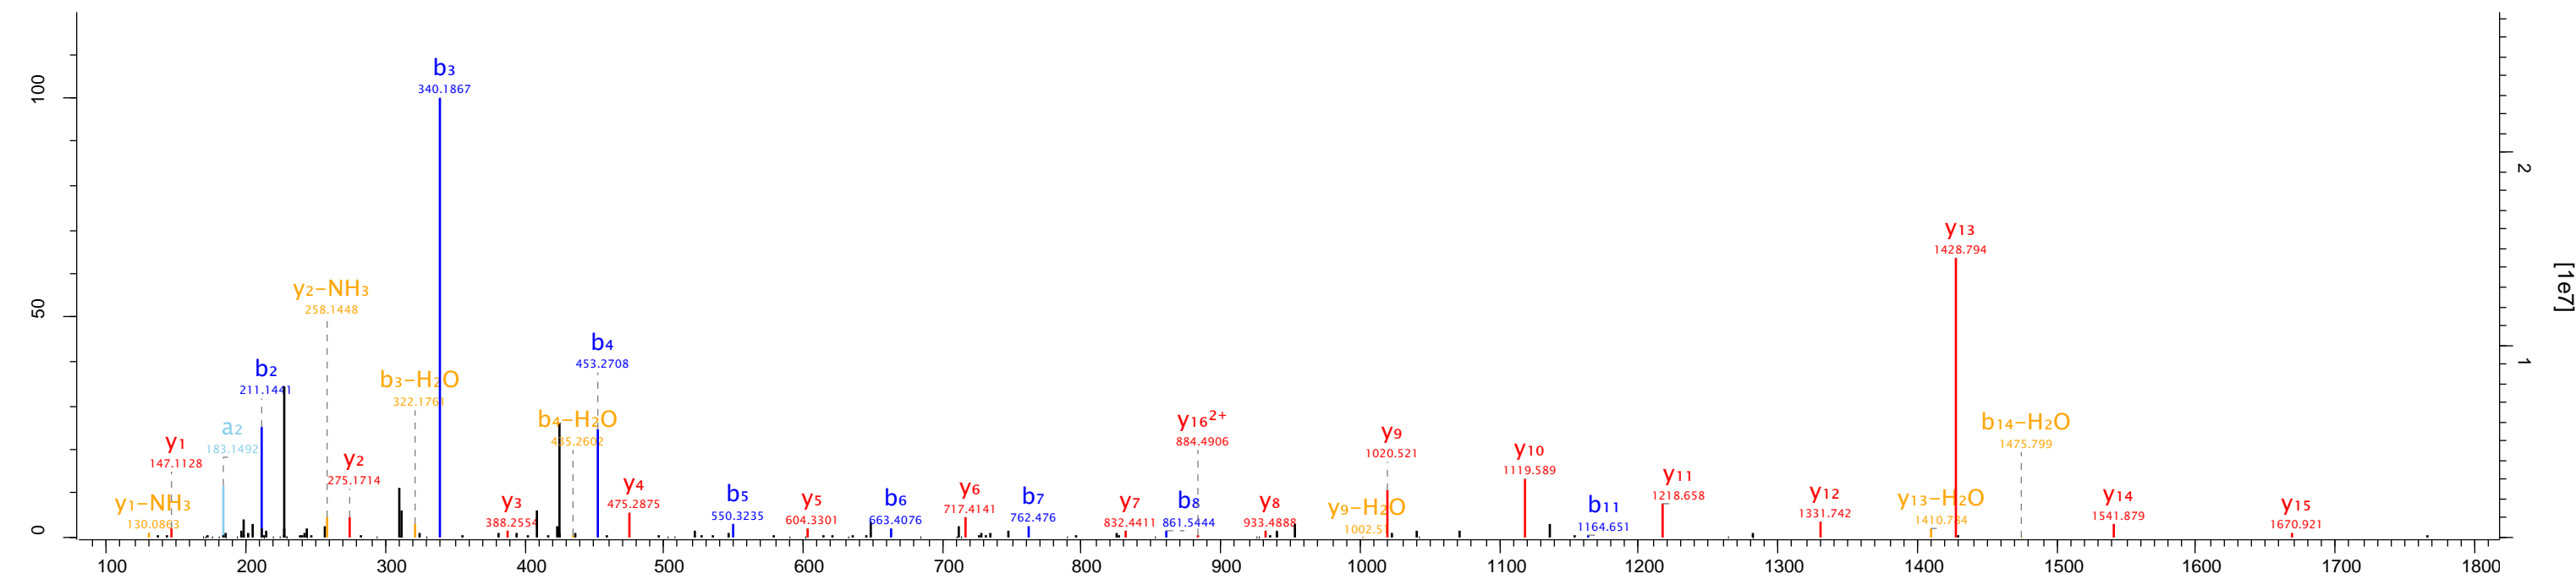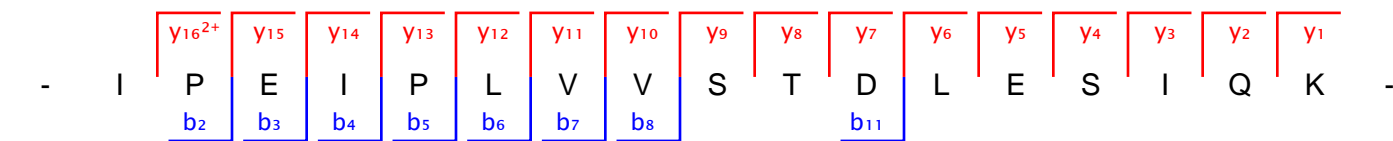

Raw file: 20140827\_EXQ00\_FaHo\_SA\_SET1\_03  
 Scan: 4649 Method: FTMS; HCD Score: 90.71 m/z: 457.28 Gene names: RPL21A;RPL21B

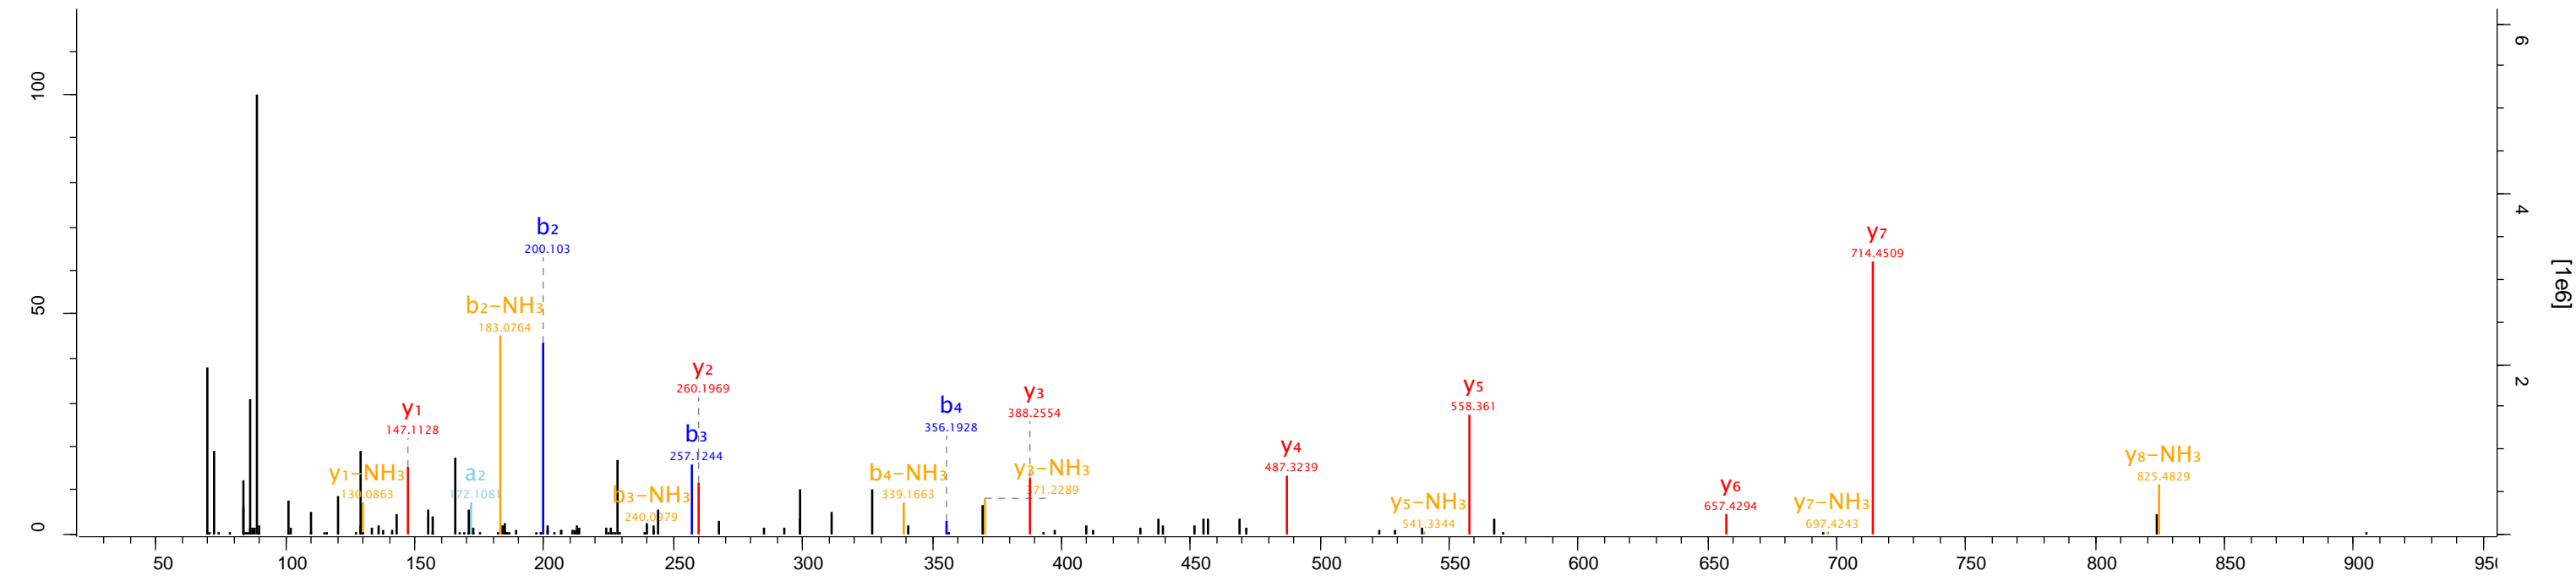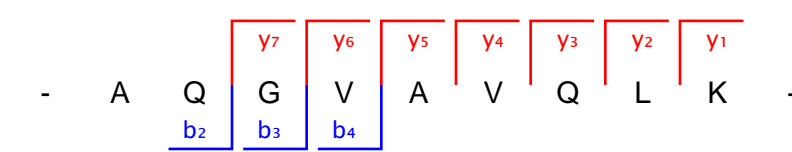

Raw file 20140827\_EXQ00\_FaHo\_SA\_SET1\_03 Scan 7865 Method FTMS; HCD Score 73.28 m/z 617.27 Gene names TUB1;TUB3

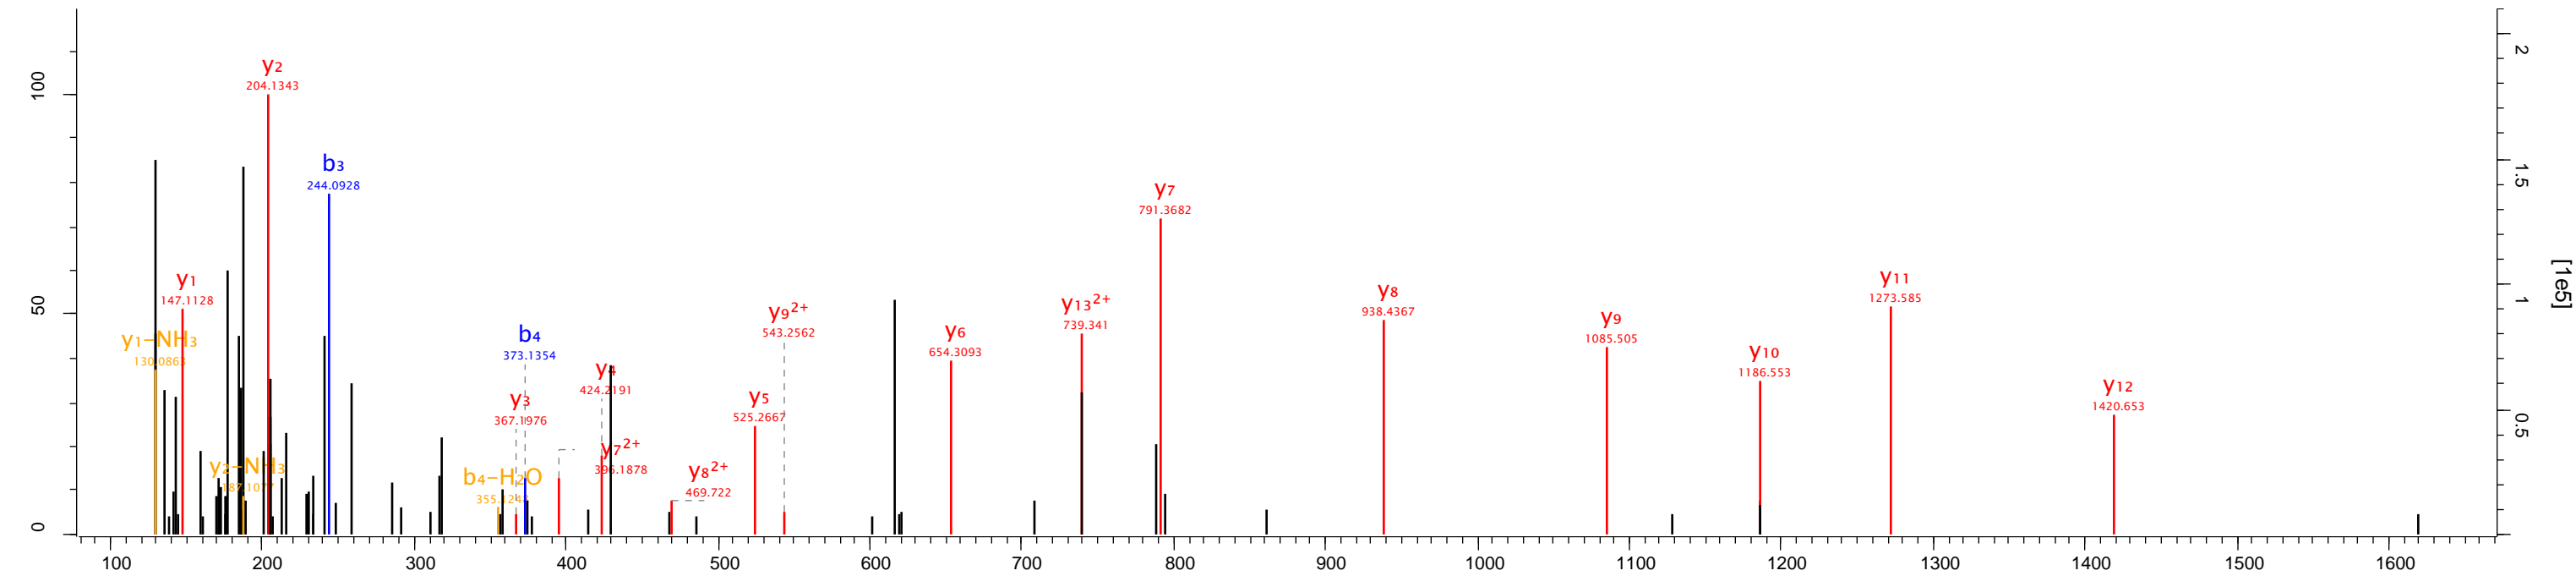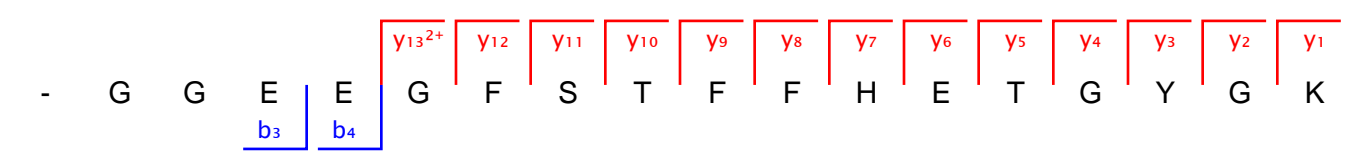

Raw file 20140827\_EXQ00\_FaHo\_SA\_SET3\_01 Scan 5382 Method FTMS; HCD Score 64.82 m/z 545.29 Gene names CCT2

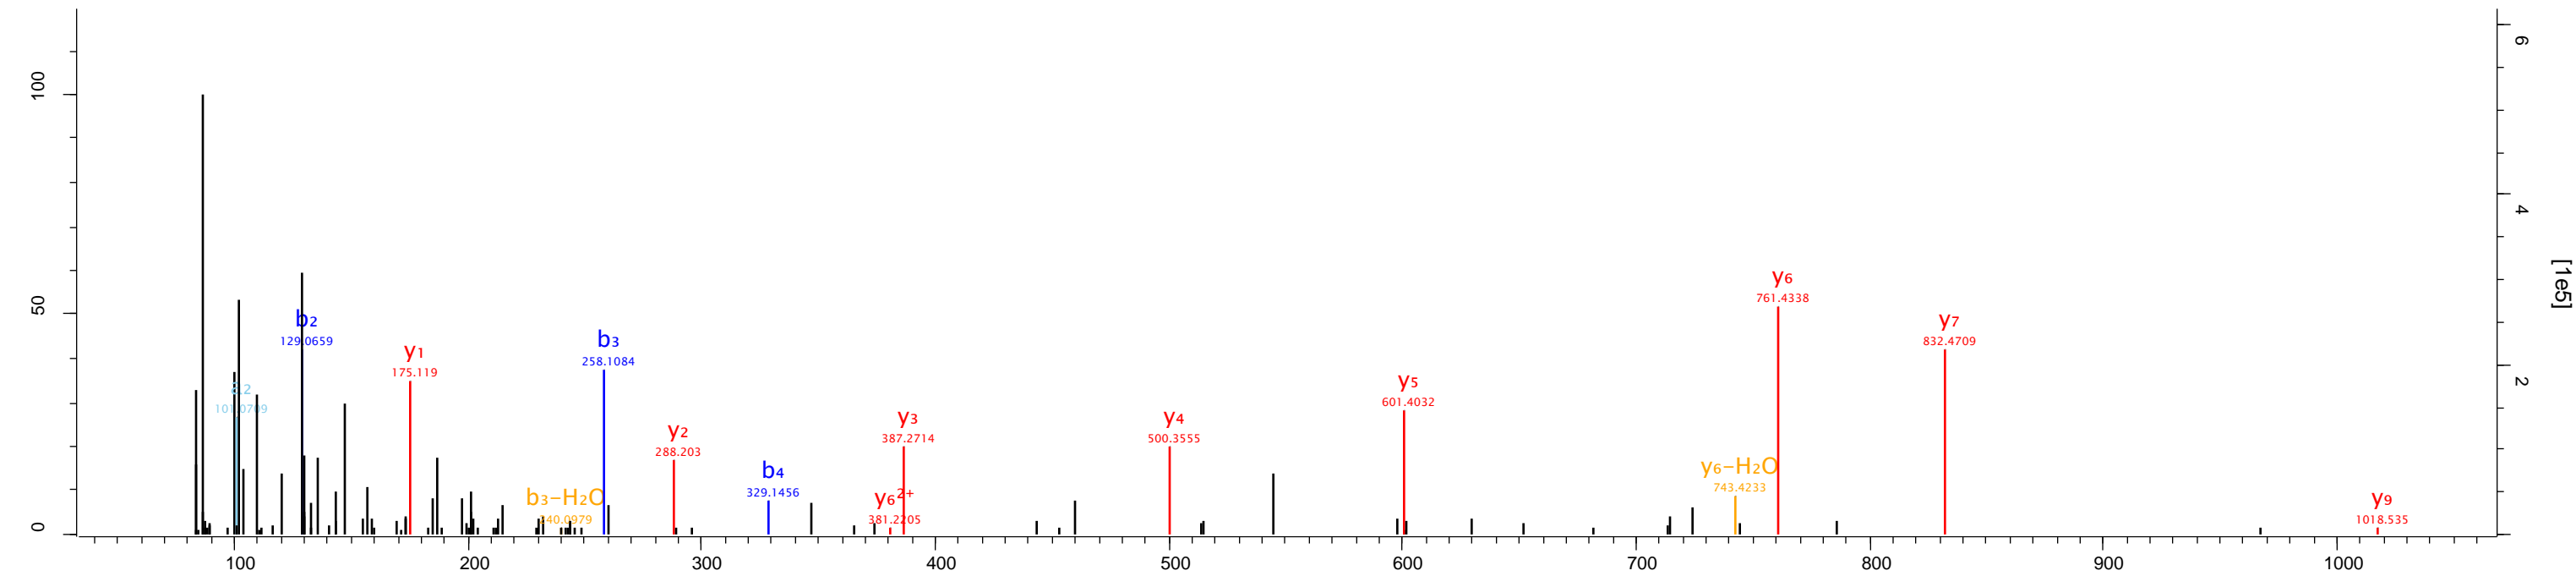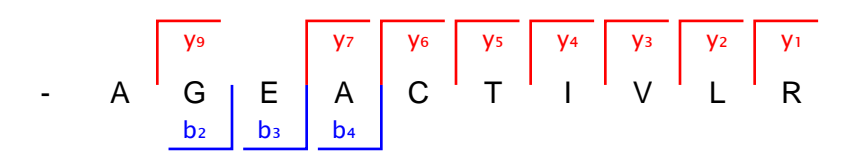

Raw file 20140827\_EXQ00\_FaHo\_SA\_SET3\_01 Scan 5993 Method FTMS; HCD Score 92.87 m/z 669.84 Gene names ARP3

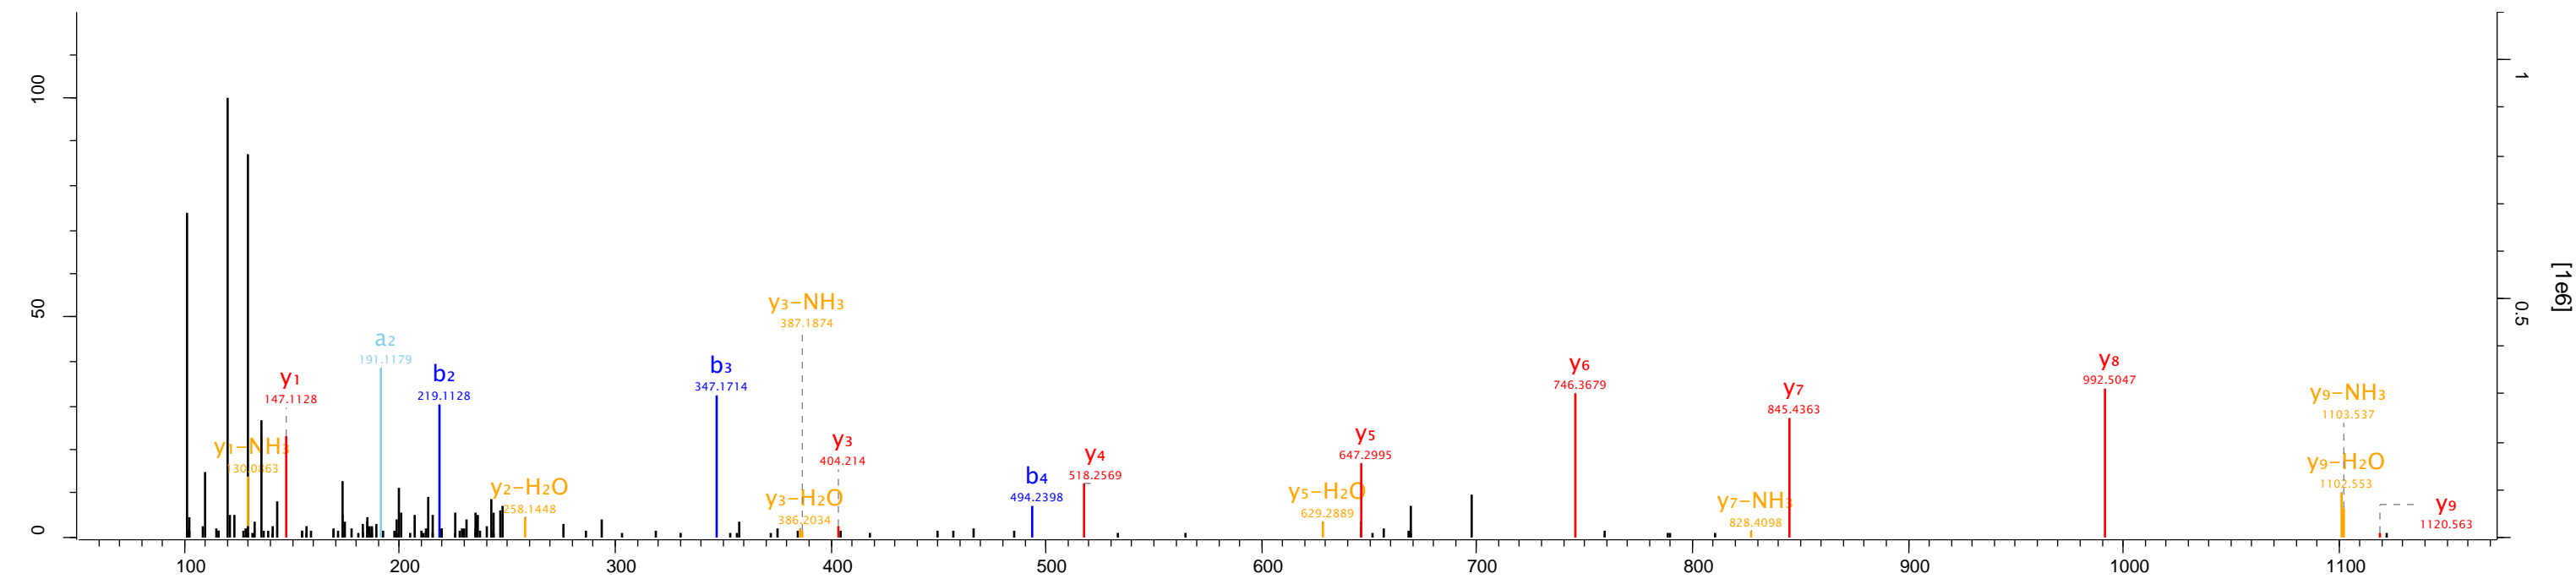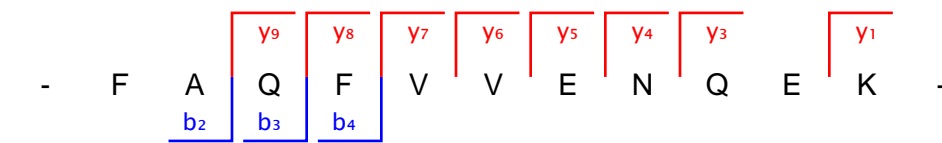

Raw file 20140827\_EXQ00\_FaHo\_SA\_SET3\_01 Scan 6552 Method FTMS; HCD Score 103.91 m/z 394.25 Gene names RPL7A;RPL7B

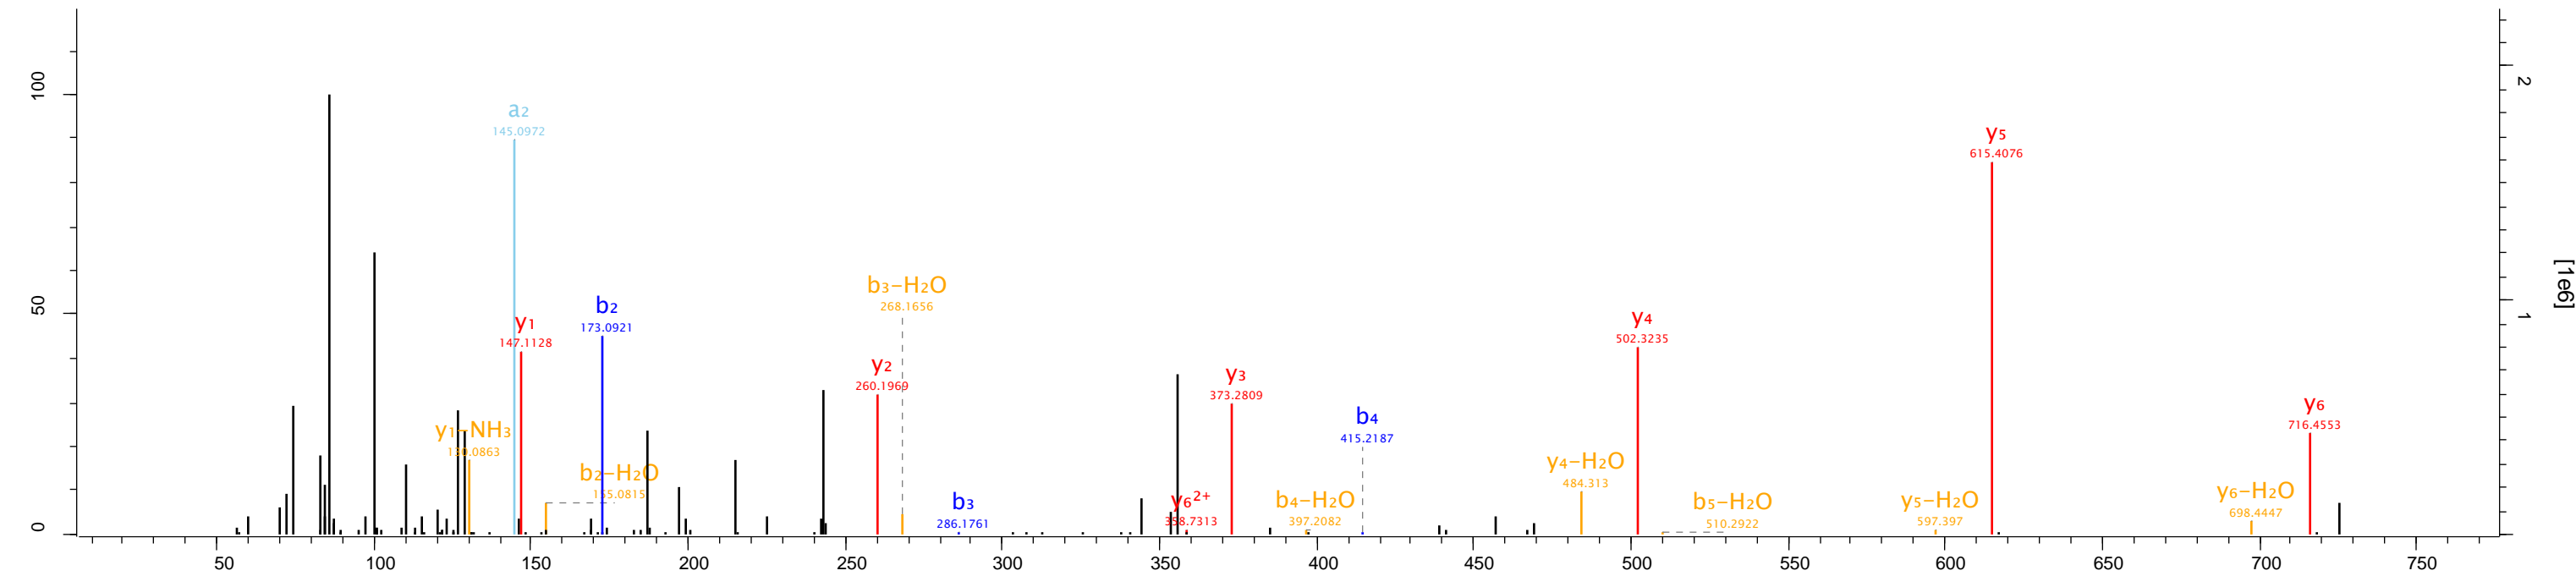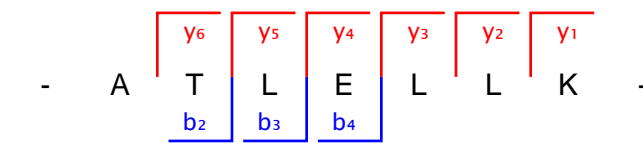

Raw file 20140827\_EXQ00\_FaHo\_SA\_SET3\_01 Scan 7387 Method FTMS; HCD Score 107.65 m/z 737.9 Gene names RPL4B;RPL4A

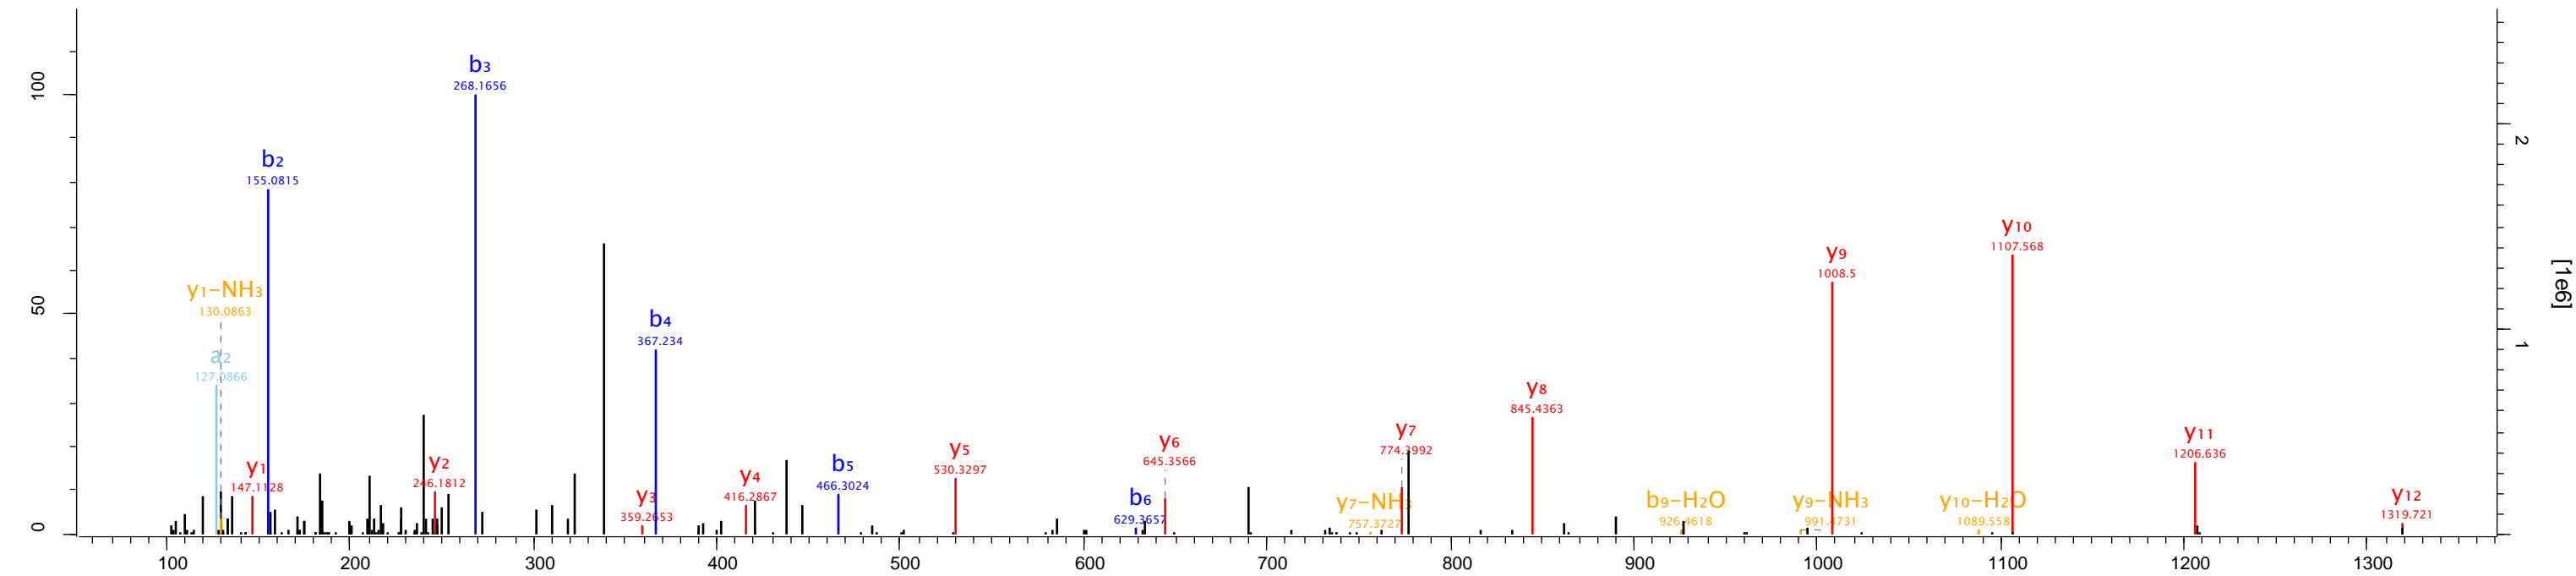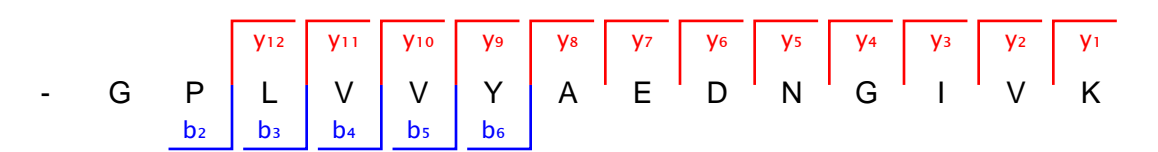

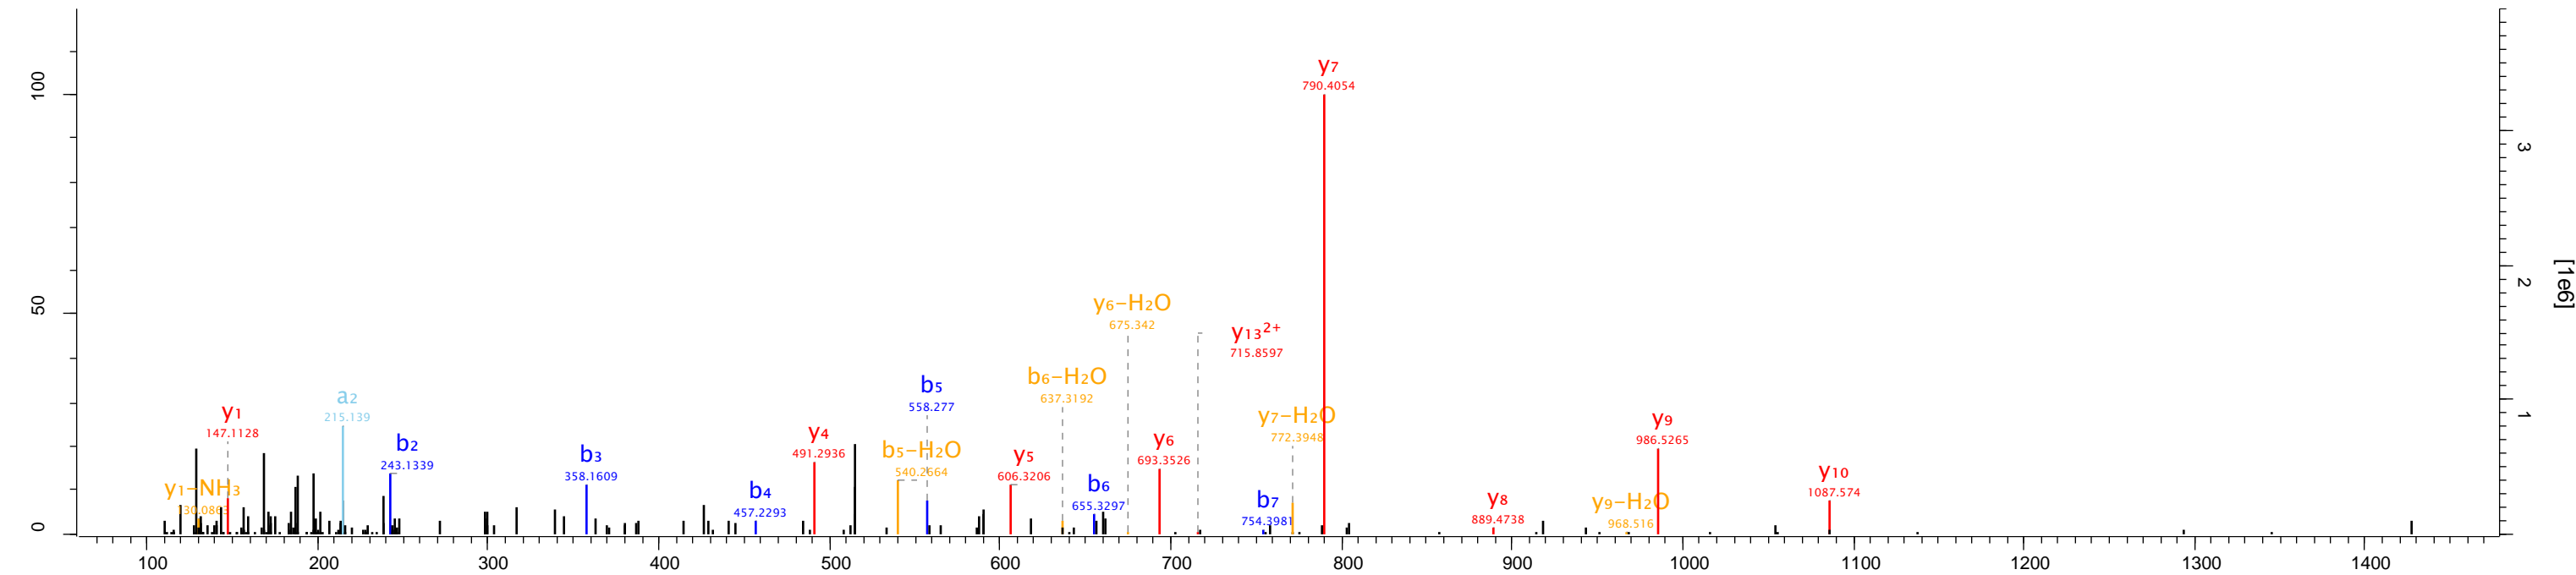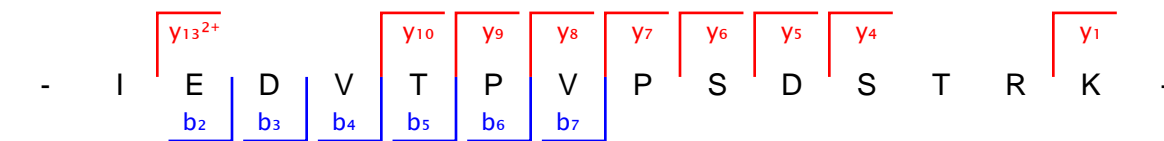



Raw file 20140827\_EXQ00\_FaHo\_SA\_SHG1\_01 Scan 8310 Method FTMS; HCD Score 27.13 m/z 596.33 Gene names RPL7A;RPL7B

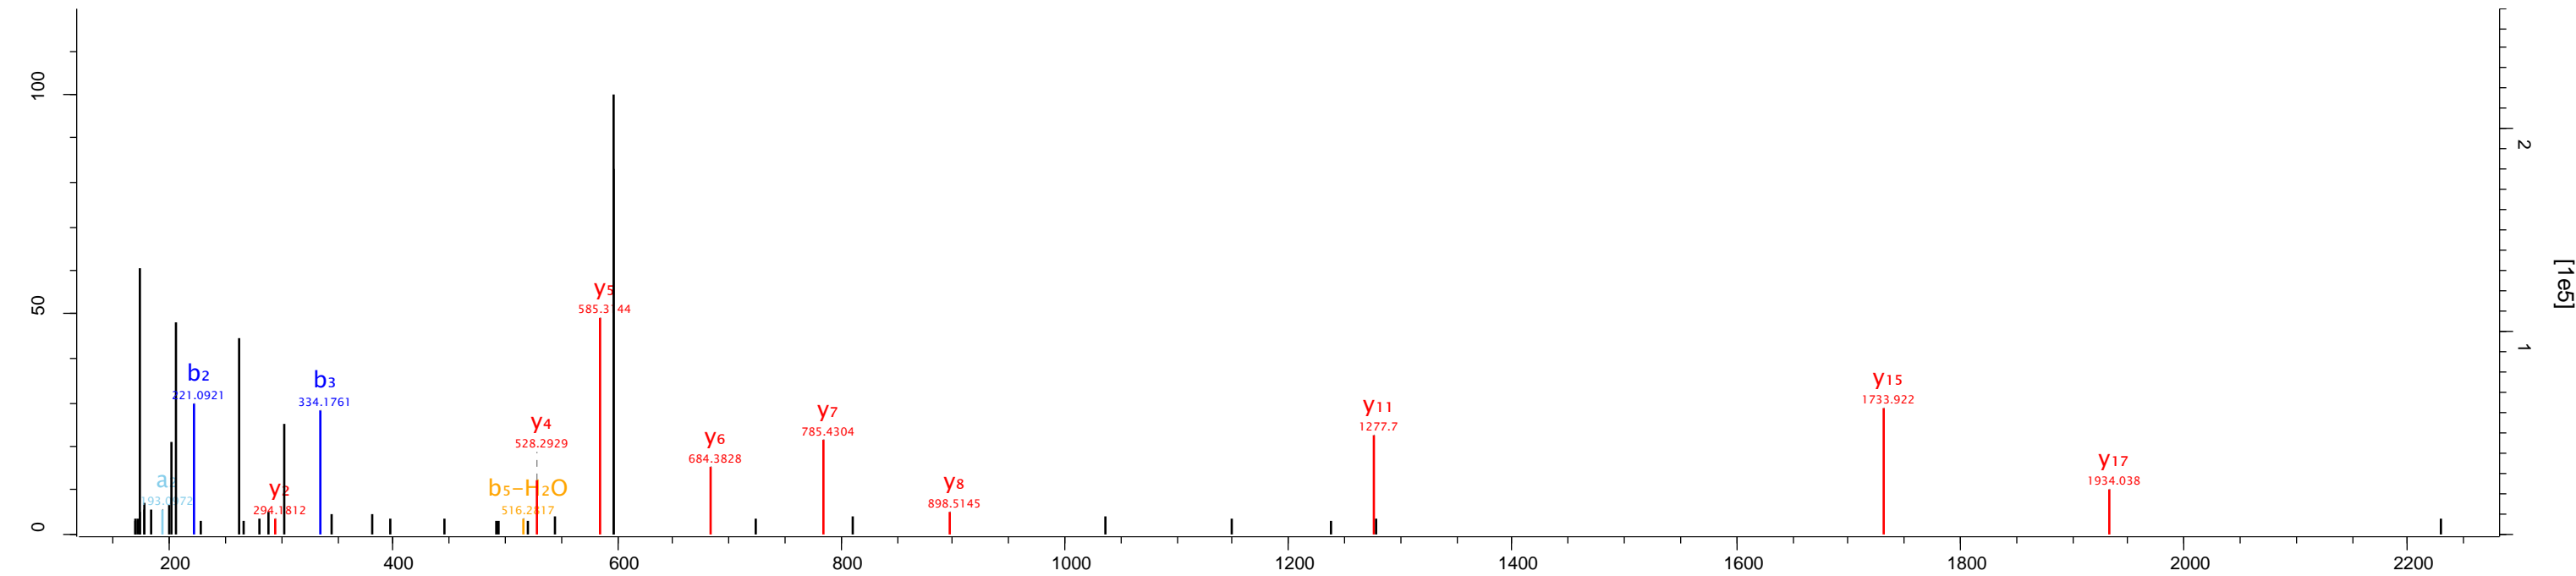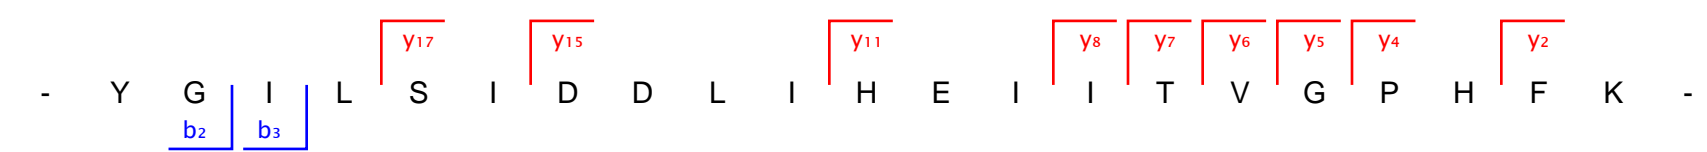

Raw file: 20140827\_EXQ00\_FaHo\_SA\_SHG1\_02  
 Scan: 2962 Method: FTMS; HCD Score: 66.27 m/z: 494.26 Gene names: RPS16B;RPS16A

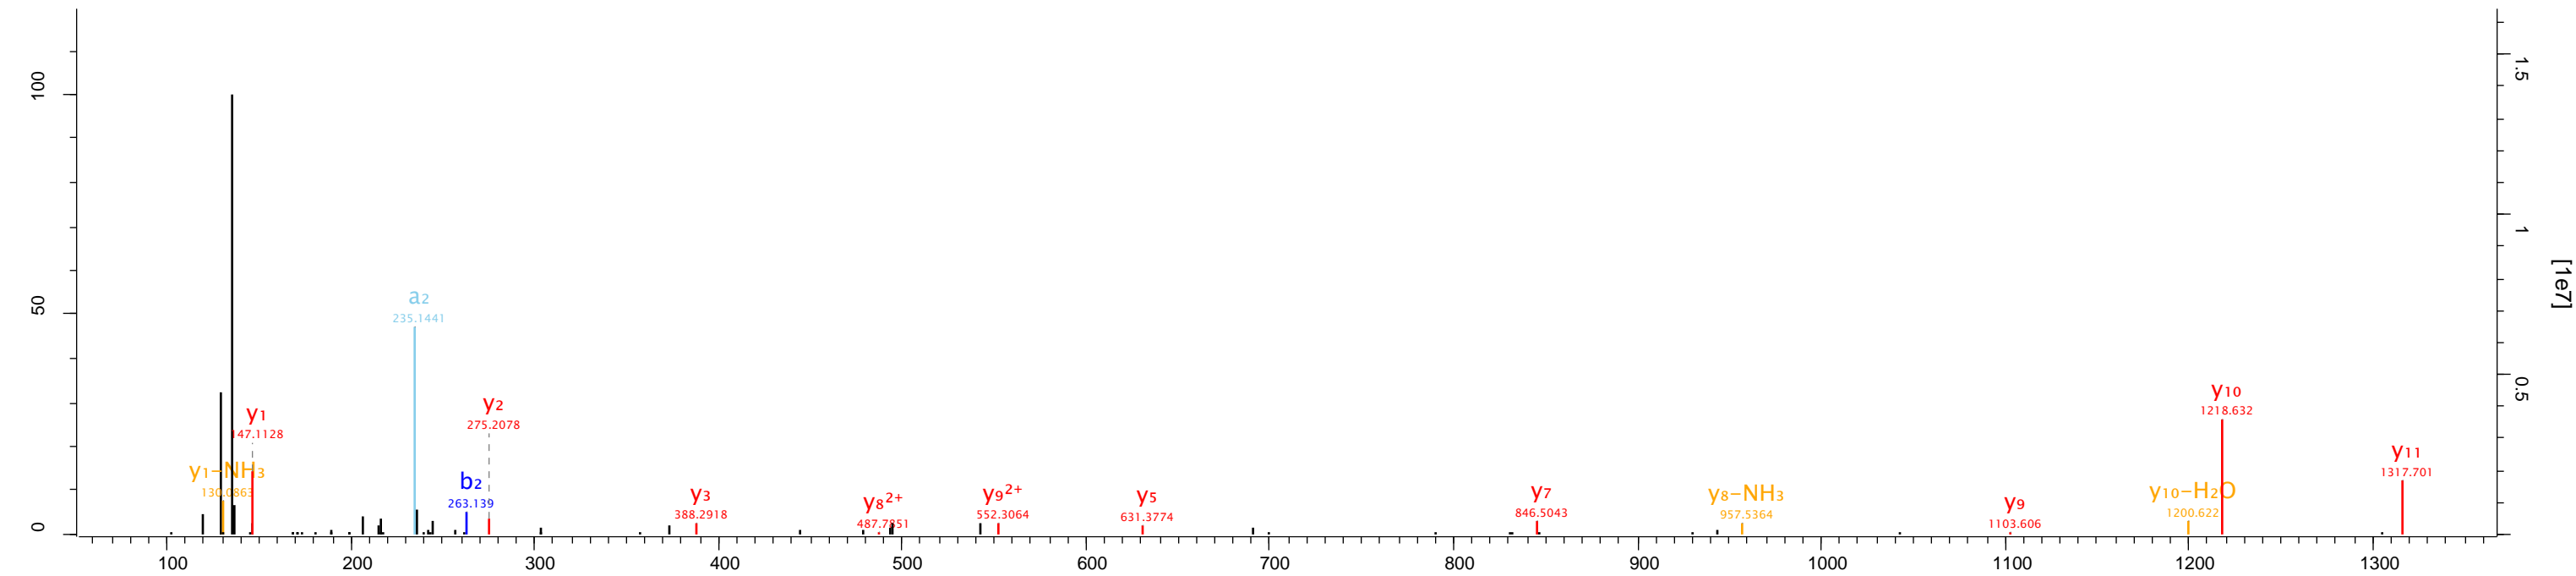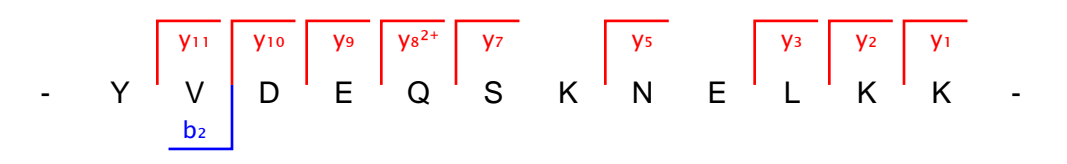

Raw file  
20140827\_EXQ00\_FaHo\_SA\_SIR2\_01

| Scan | Method    | Score | m/z    | Gene names |
|------|-----------|-------|--------|------------|
| 5060 | FTMS; HCD | 1.19  | 803.38 | PDR10      |

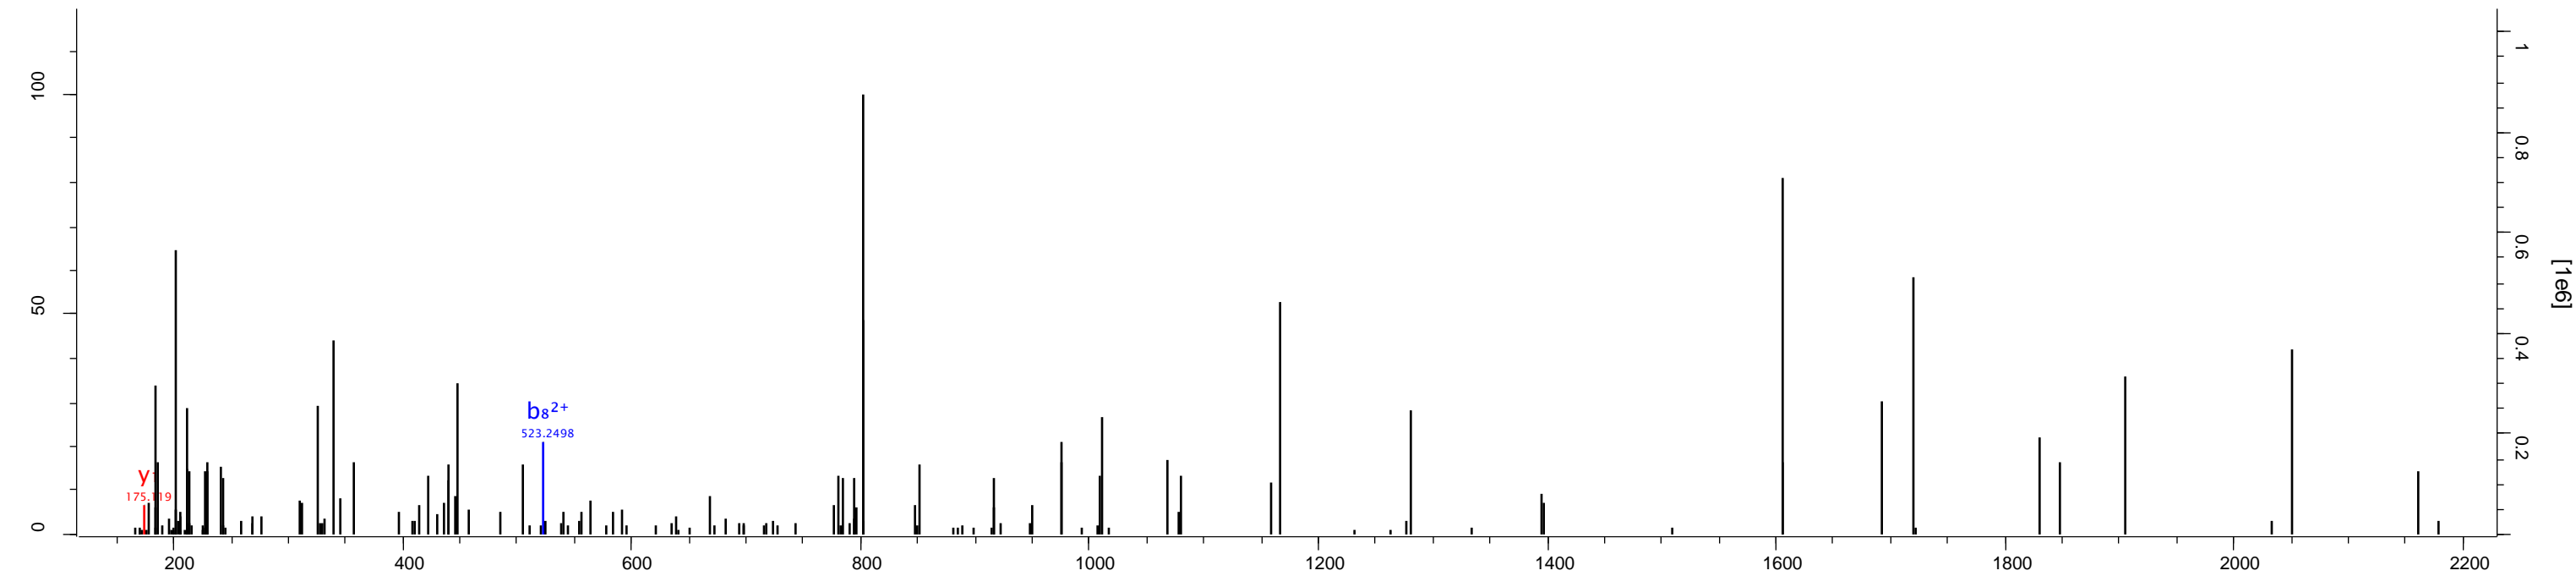

- Y F Q R M G Y V C P E R -

Annotations: **b<sub>8</sub><sup>2+</sup>** (under V), **y<sub>1</sub>** (over R)

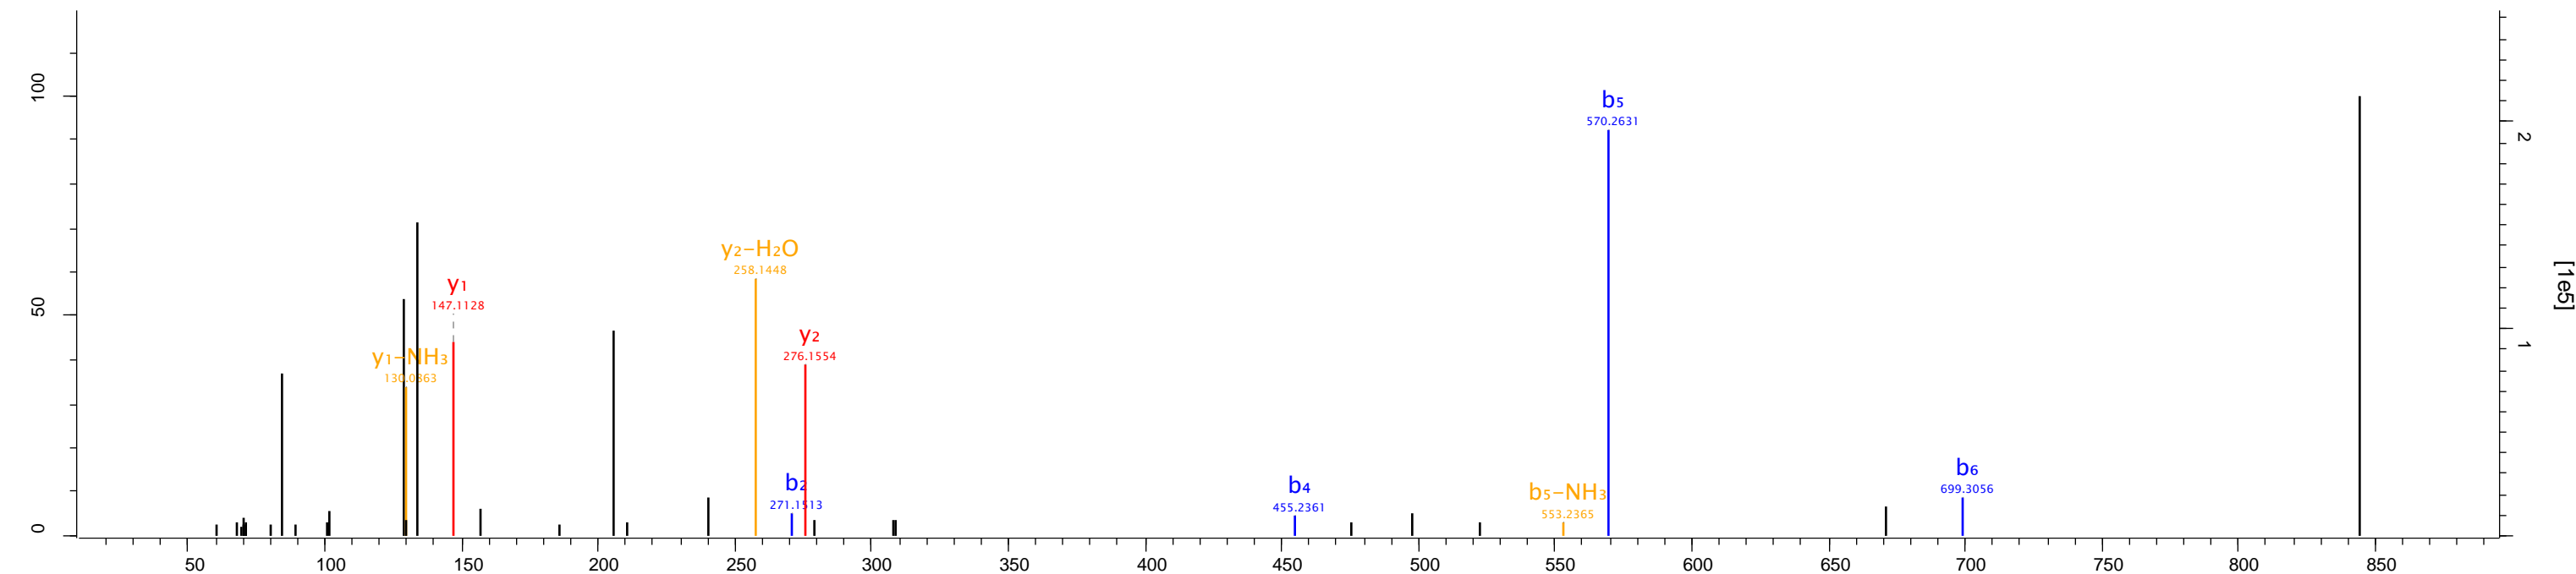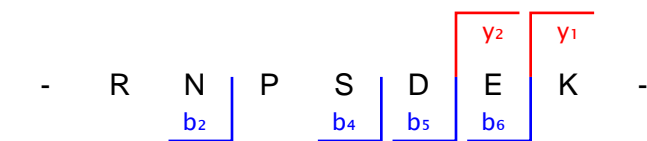

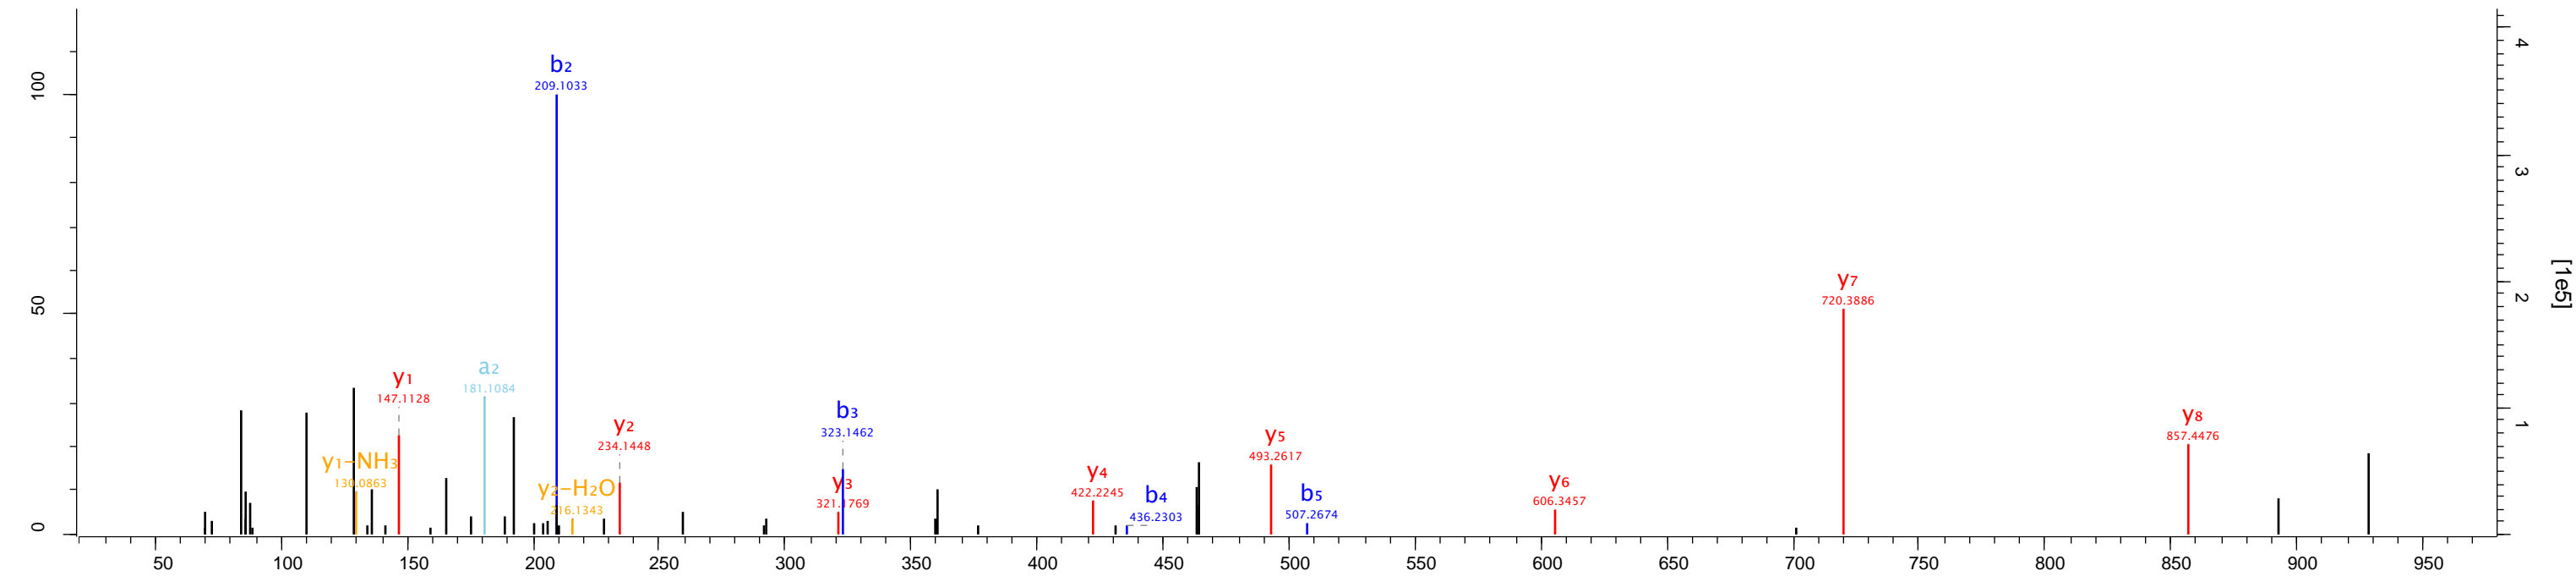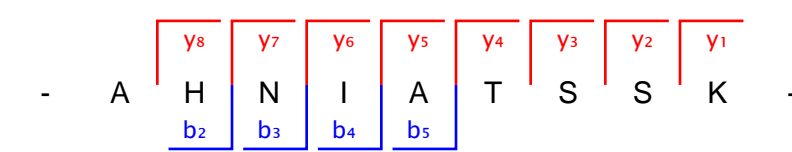

20140827\_EXQ00\_FaHo\_SA\_SIR2\_0;2936 FTMS; HCD 209.74 1037.97 TY1B-LR3;TY1A-PL;TY1A-LR2;TY1A-ER1;TY1A-DR6;TY1B-OL;TY1B-LR4;TY1B-LR2;TY1B-PL;TY1B-ER1;TY1B-PR3;TY1A-PR1;TY1A-A;TY1A-DR4;TY1B-H;TY1B-GR2;TY1B-MR2;TY1B-ER2;TY1B-OR;TY1B-BR;TY1B-DR1;TY1B-

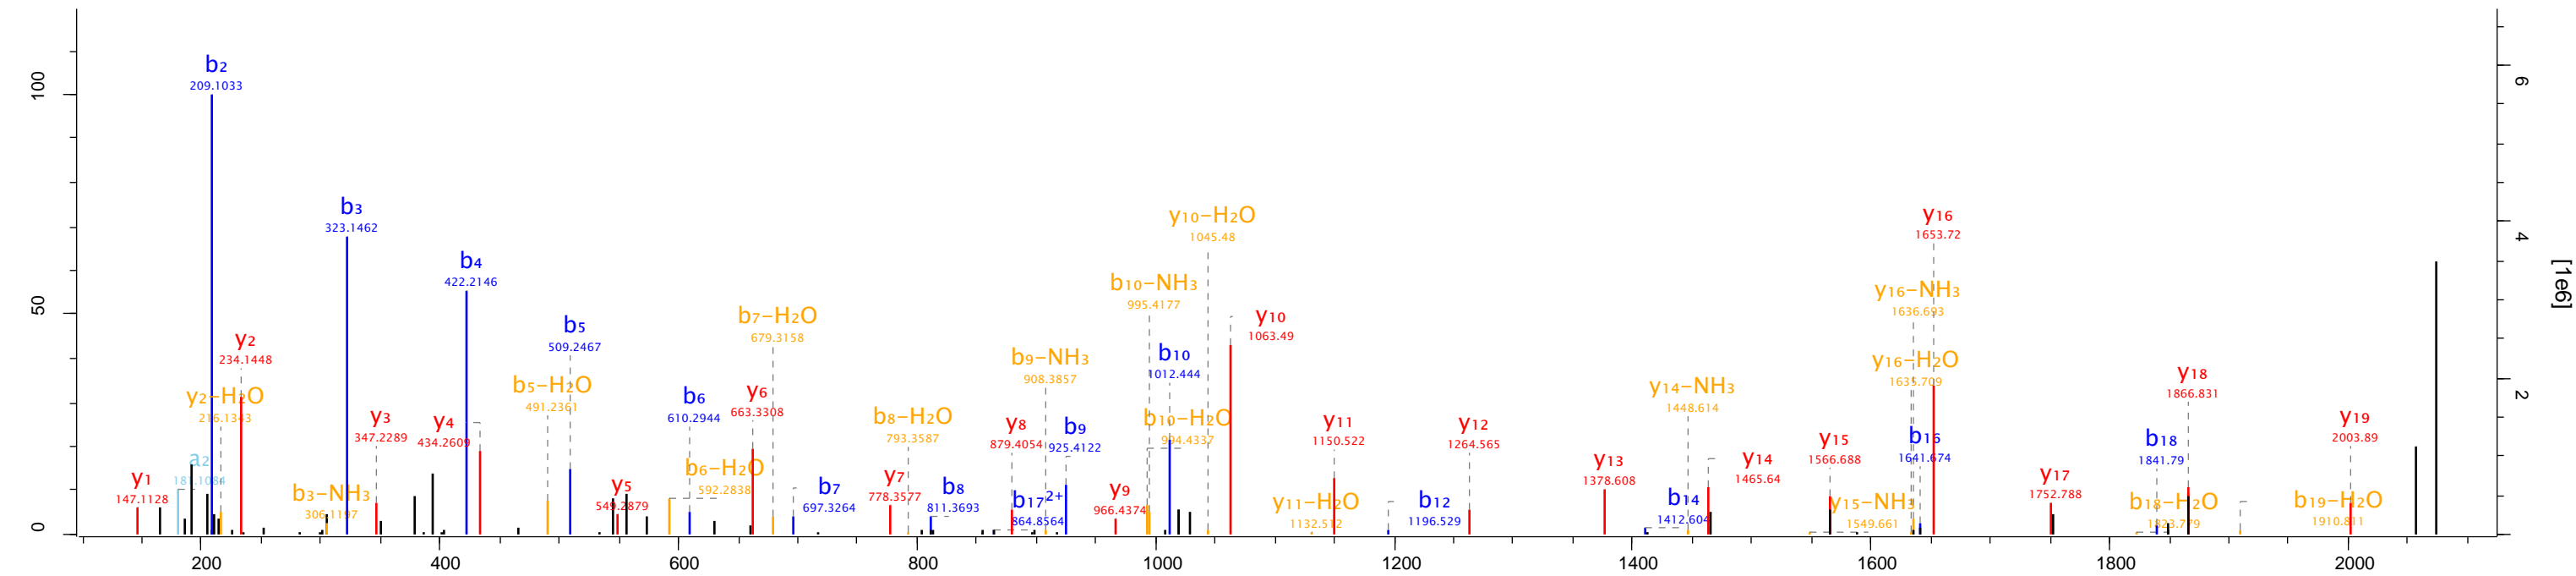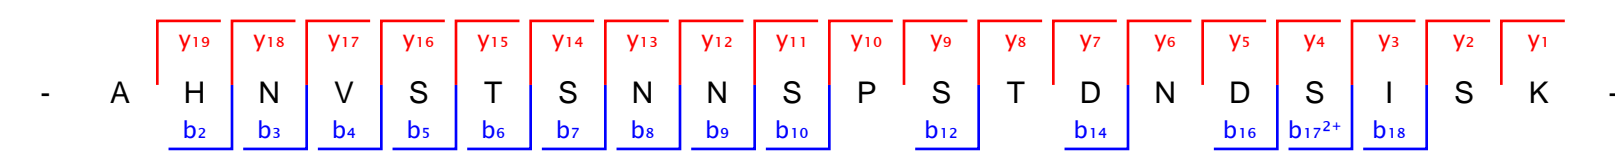

Raw file: 20140827\_EXQ00\_FaHo\_SA\_SIR2\_02  
 Scan: 3971 Method: FTMS; HCD Score: 123.02 m/z: 559.25 Gene names: SSA1;SSA2;SSA3

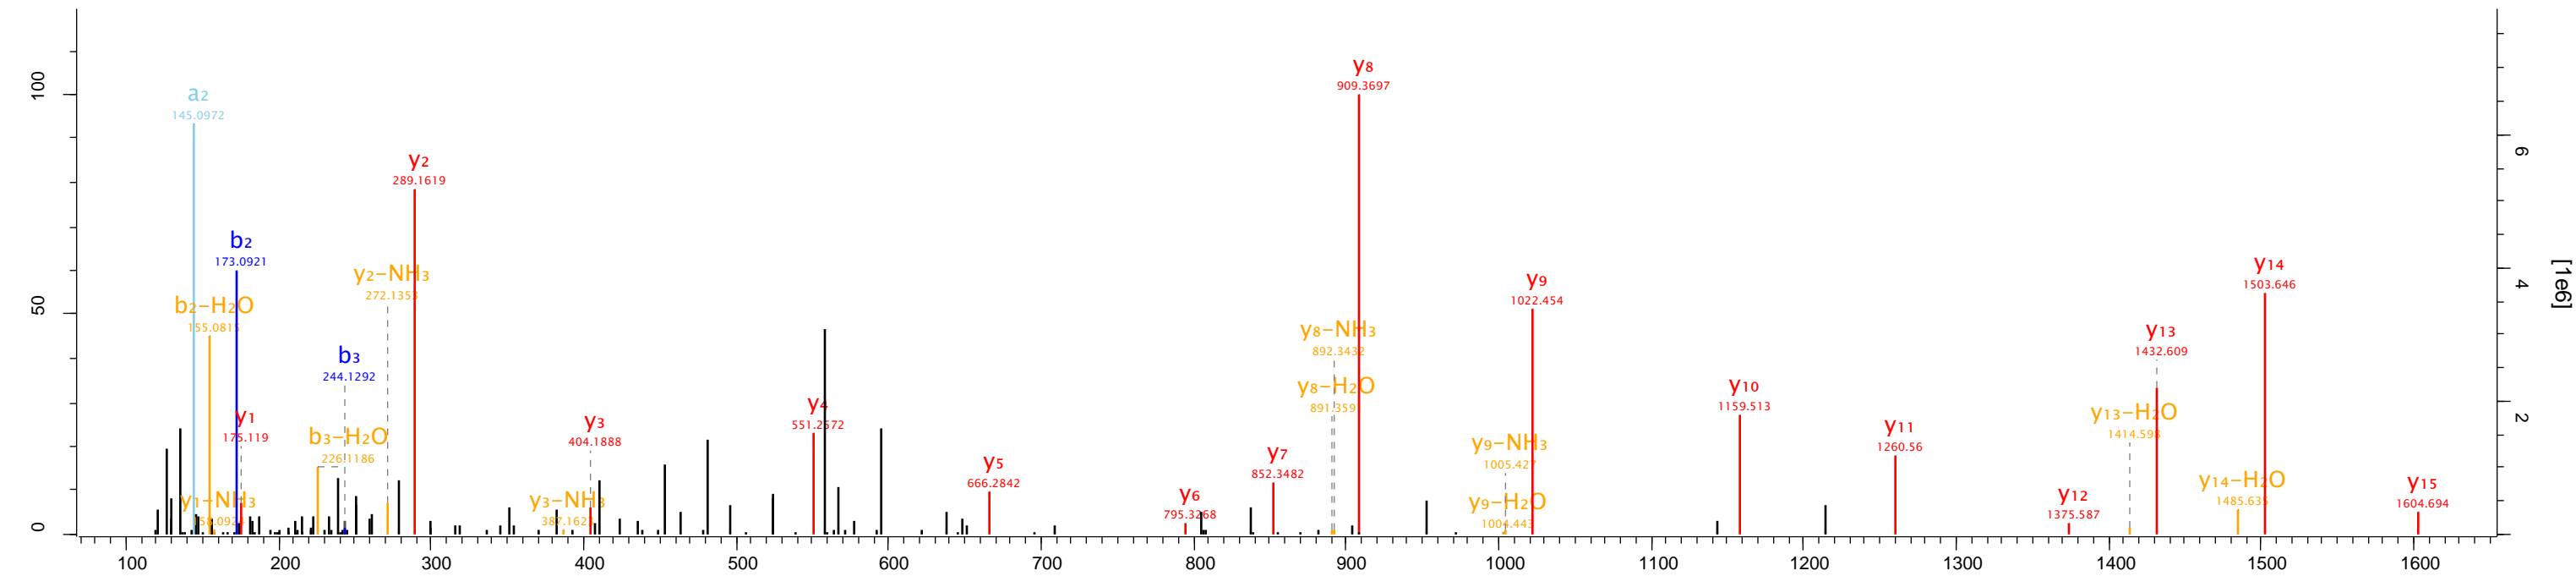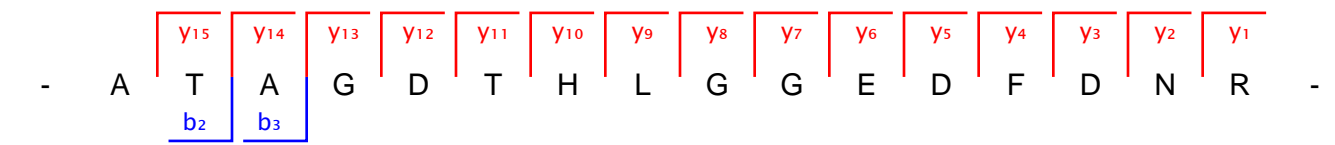

Raw file: 20140827\_EXQ00\_FaHo\_SA\_SIR2\_02  
 Scan: 4109 Method: FTMS; HCD Score: 120.45 m/z: 605.83 Gene names: TY1B-NL1;TY1B-BL;TY1B-MR1;TY1A-MR1

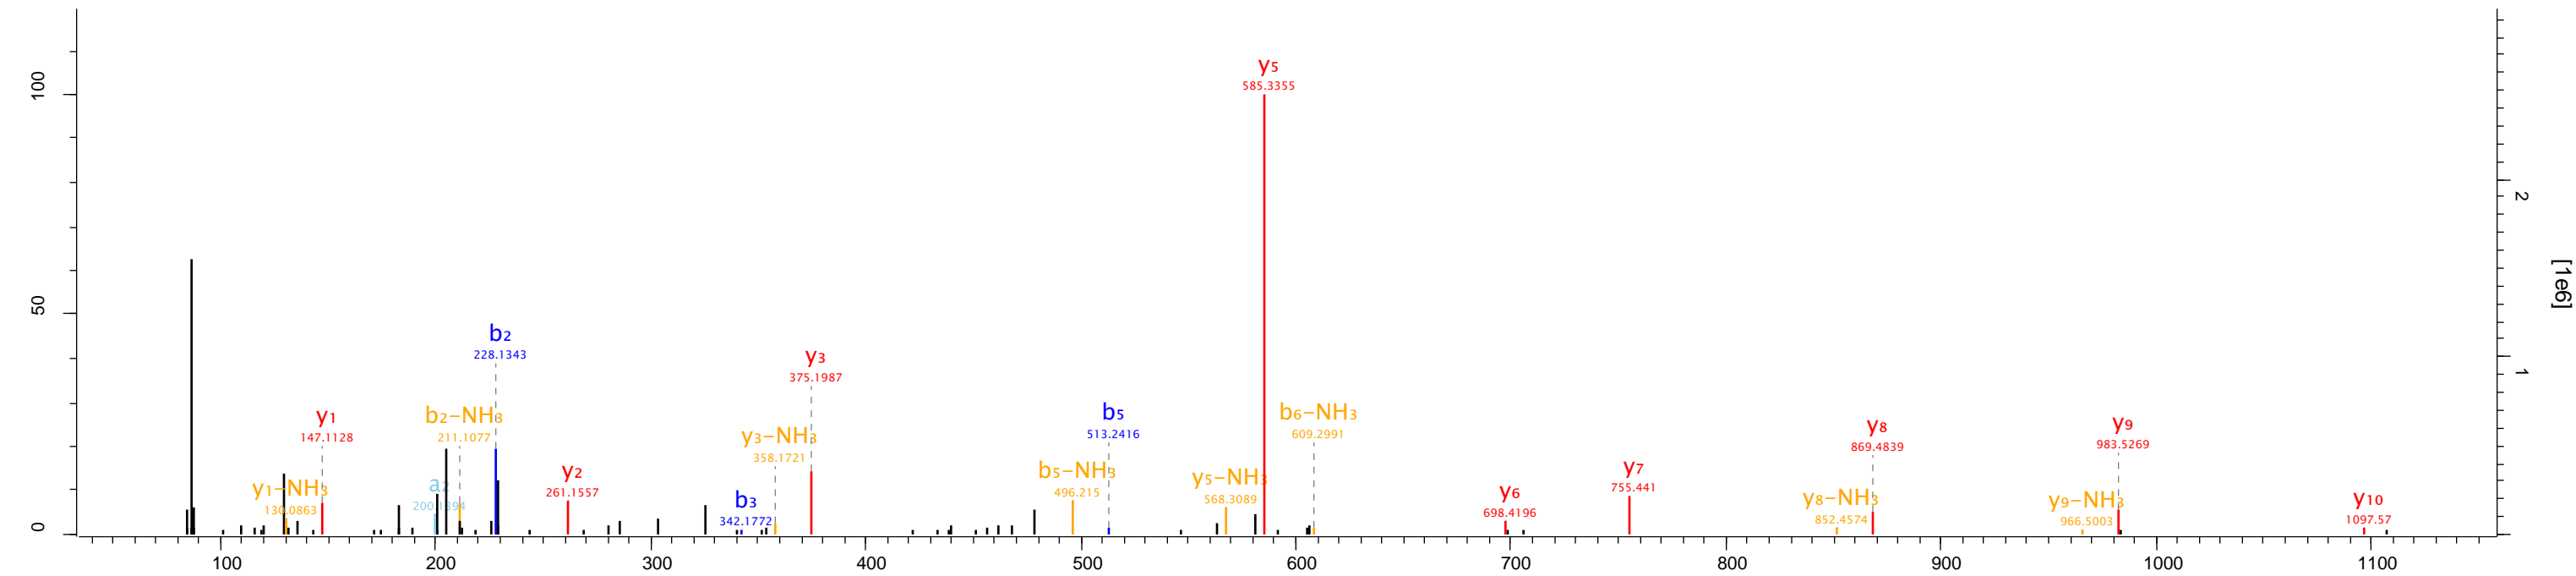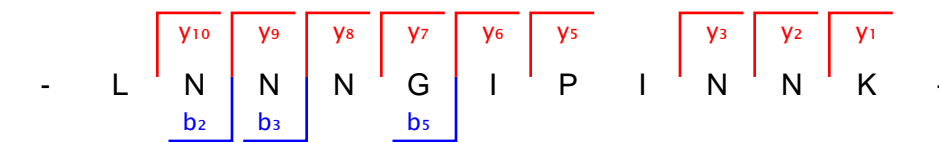



Raw file Scan Method Score m/z Gene names  
 20140827\_EXQ00\_FaHo\_SA\_SIR2\_02 4239 FTMS; HCD 50.13 446.71 TY1B-LR3;TY1B-OL;TY1B-LR4;TY1B-LR2;TY1B-PL;TY1B-ER1;TY1B-PR3;TY1B-H;TY1B-GR2;TY1B-MR2;TY1B-ER2;TY1B-OR;TY1B-BR;TY1B-DR1;TY1B-NL2;TY1B-LR1;TY1B-DR3;TY1B-NL1;TY1B-A;TY1B-BL;TY1B-MR1

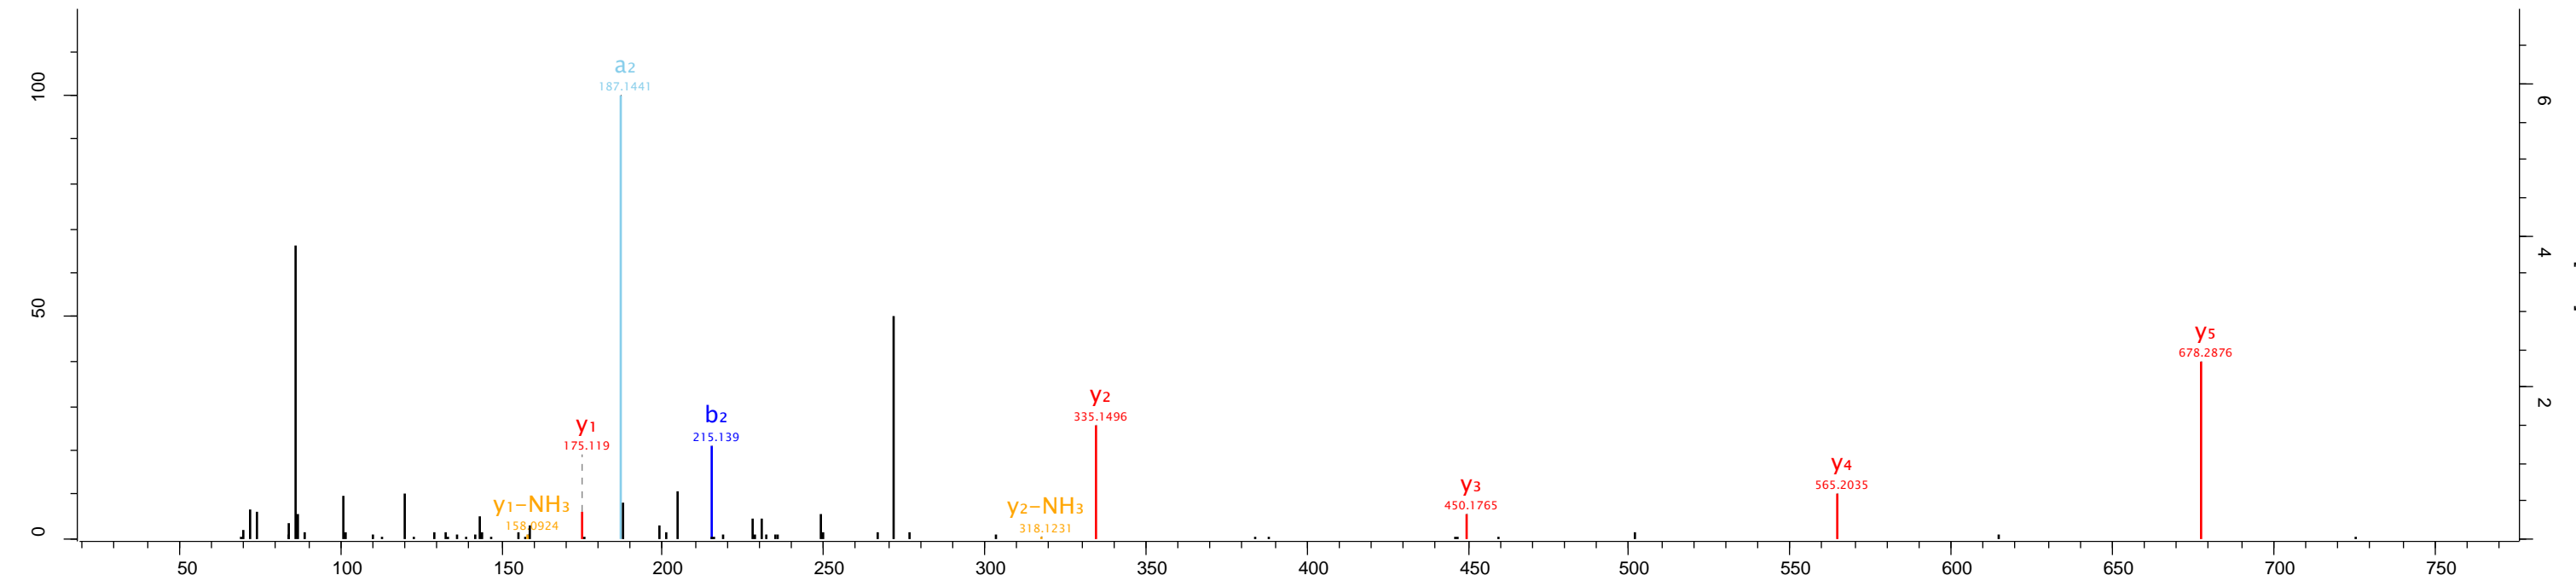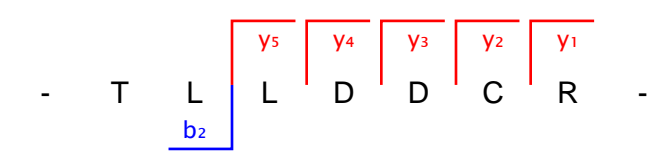

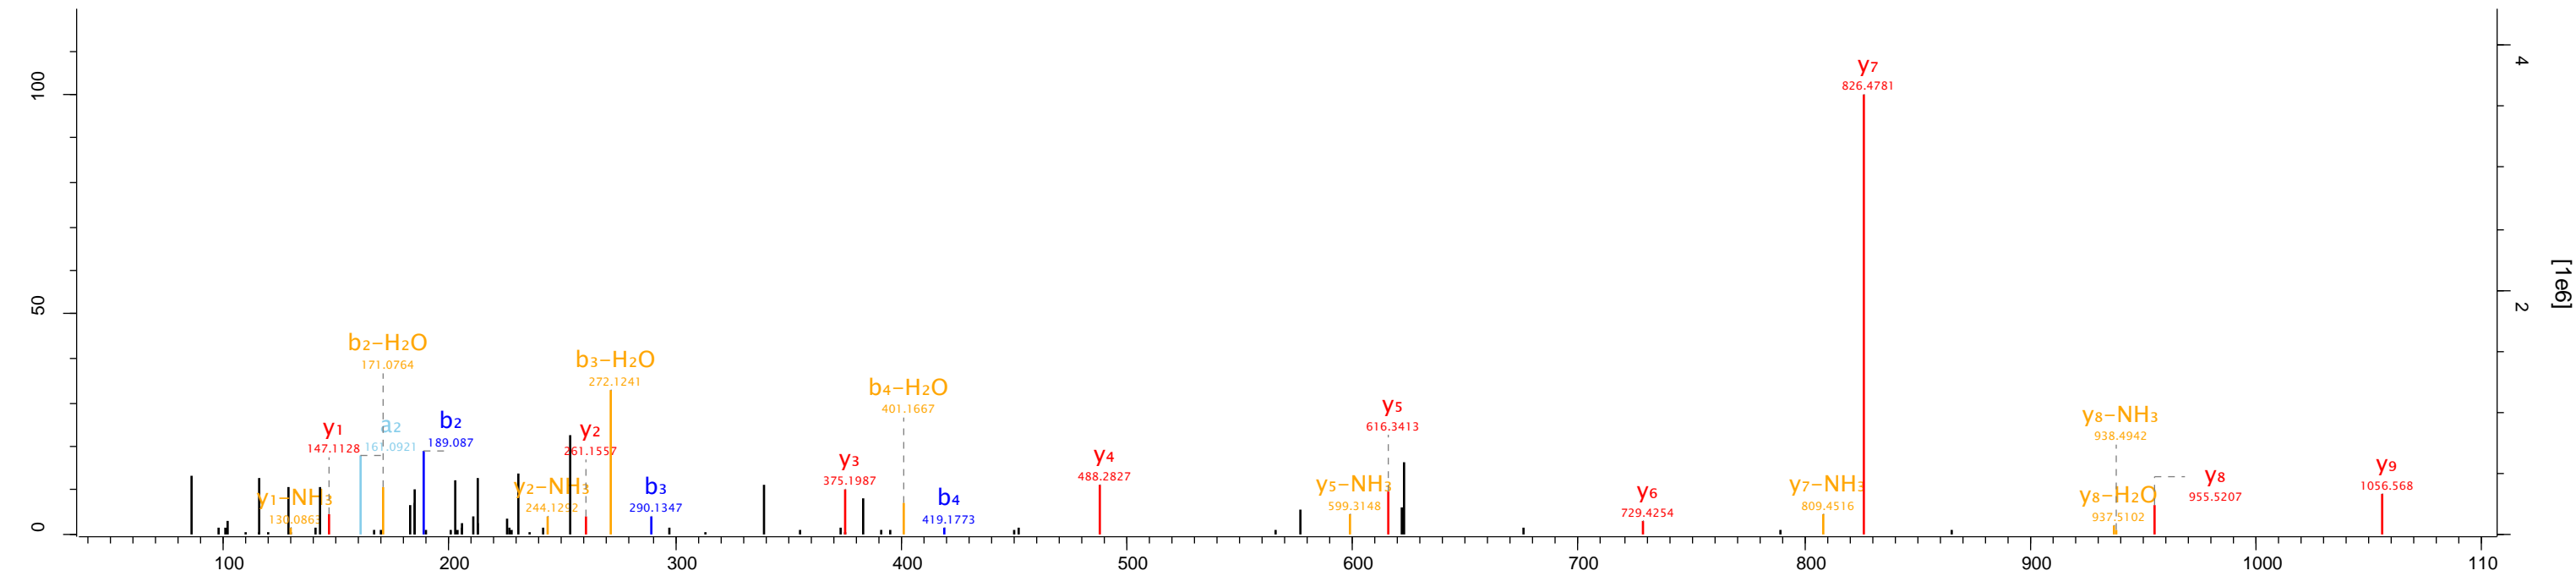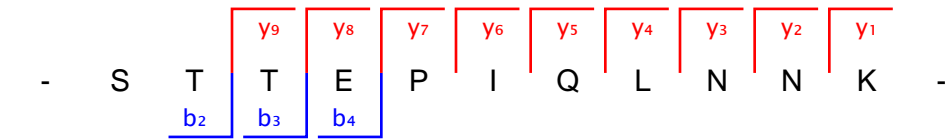

Raw file: 20140827\_EXQ00\_FaHo\_SA\_SIR2\_02  
 Scan: 5452 Method: FTMS; HCD Score: 89.55 m/z: 512.76 Gene names: TY1B-NL1;TY1B-BL;TY1B-MR1;TY1A-DR2;TY1A-MR1

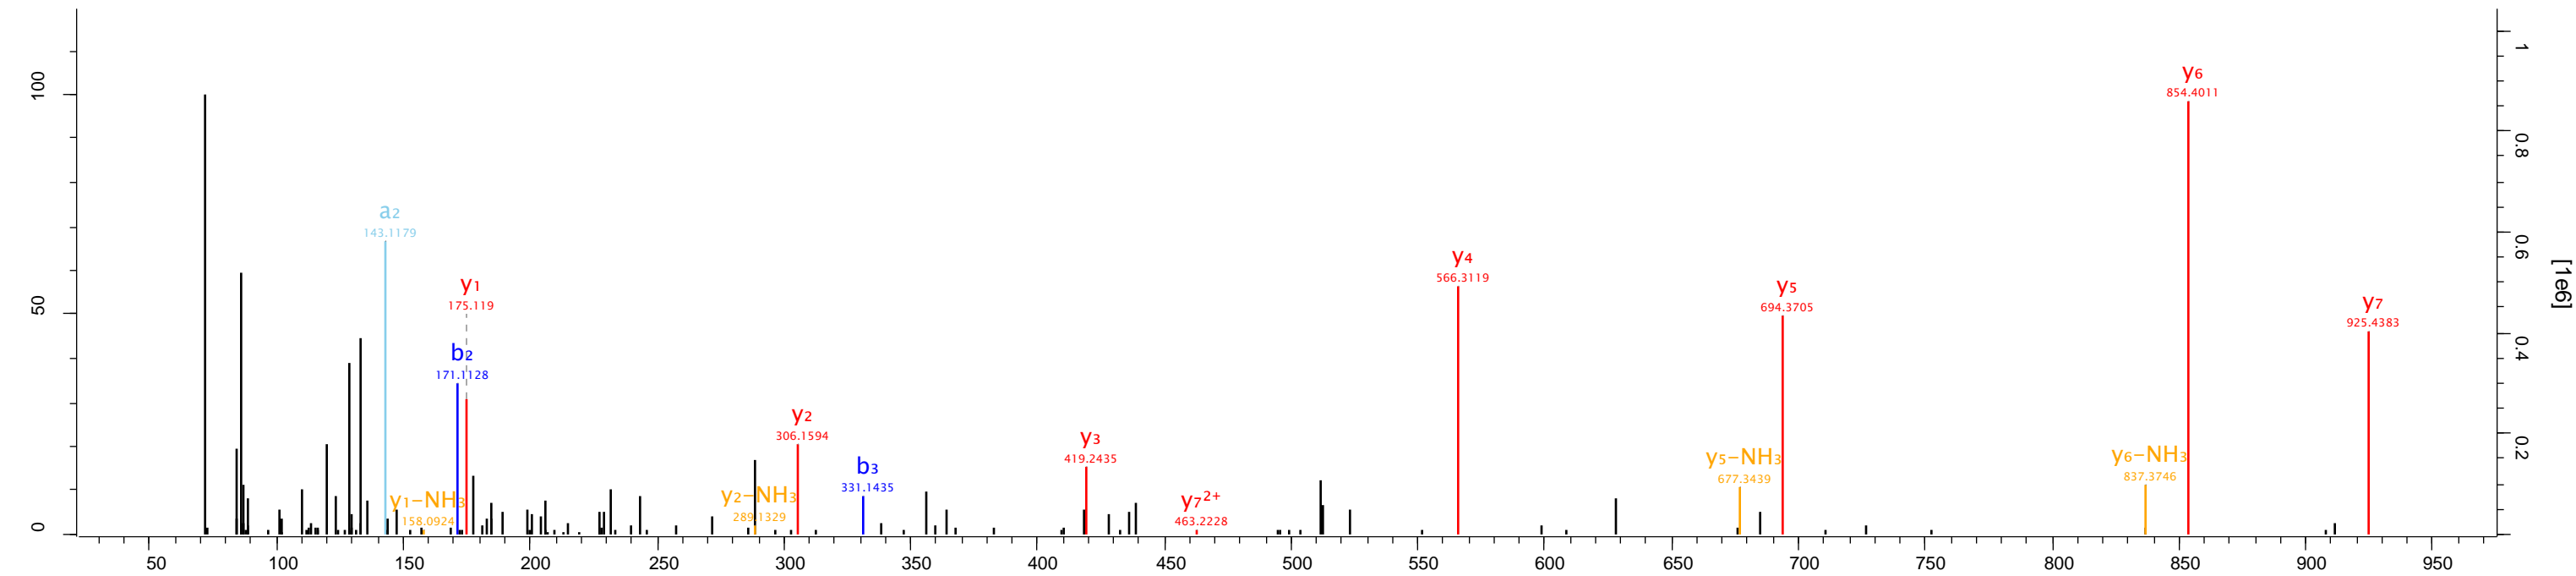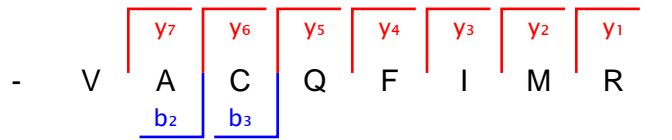

Raw file

20140827\_EXQ00\_FaHo\_SA\_SIR2\_02

Scan

5601

Method

FTMS; HCD

Score

105.38

m/z

1065.02

Gene names

TY1B-LR3;TY1B-LR4;TY1B-LR2;TY1B-PL;TY1B-ER1;TY1B-PR3;TY1B-MR2;TY1B-ER2;TY1B-OR;TY1B-BR;TY1B-NL2;TY1B-NL1;TY1B-BL;TY1B-MR1

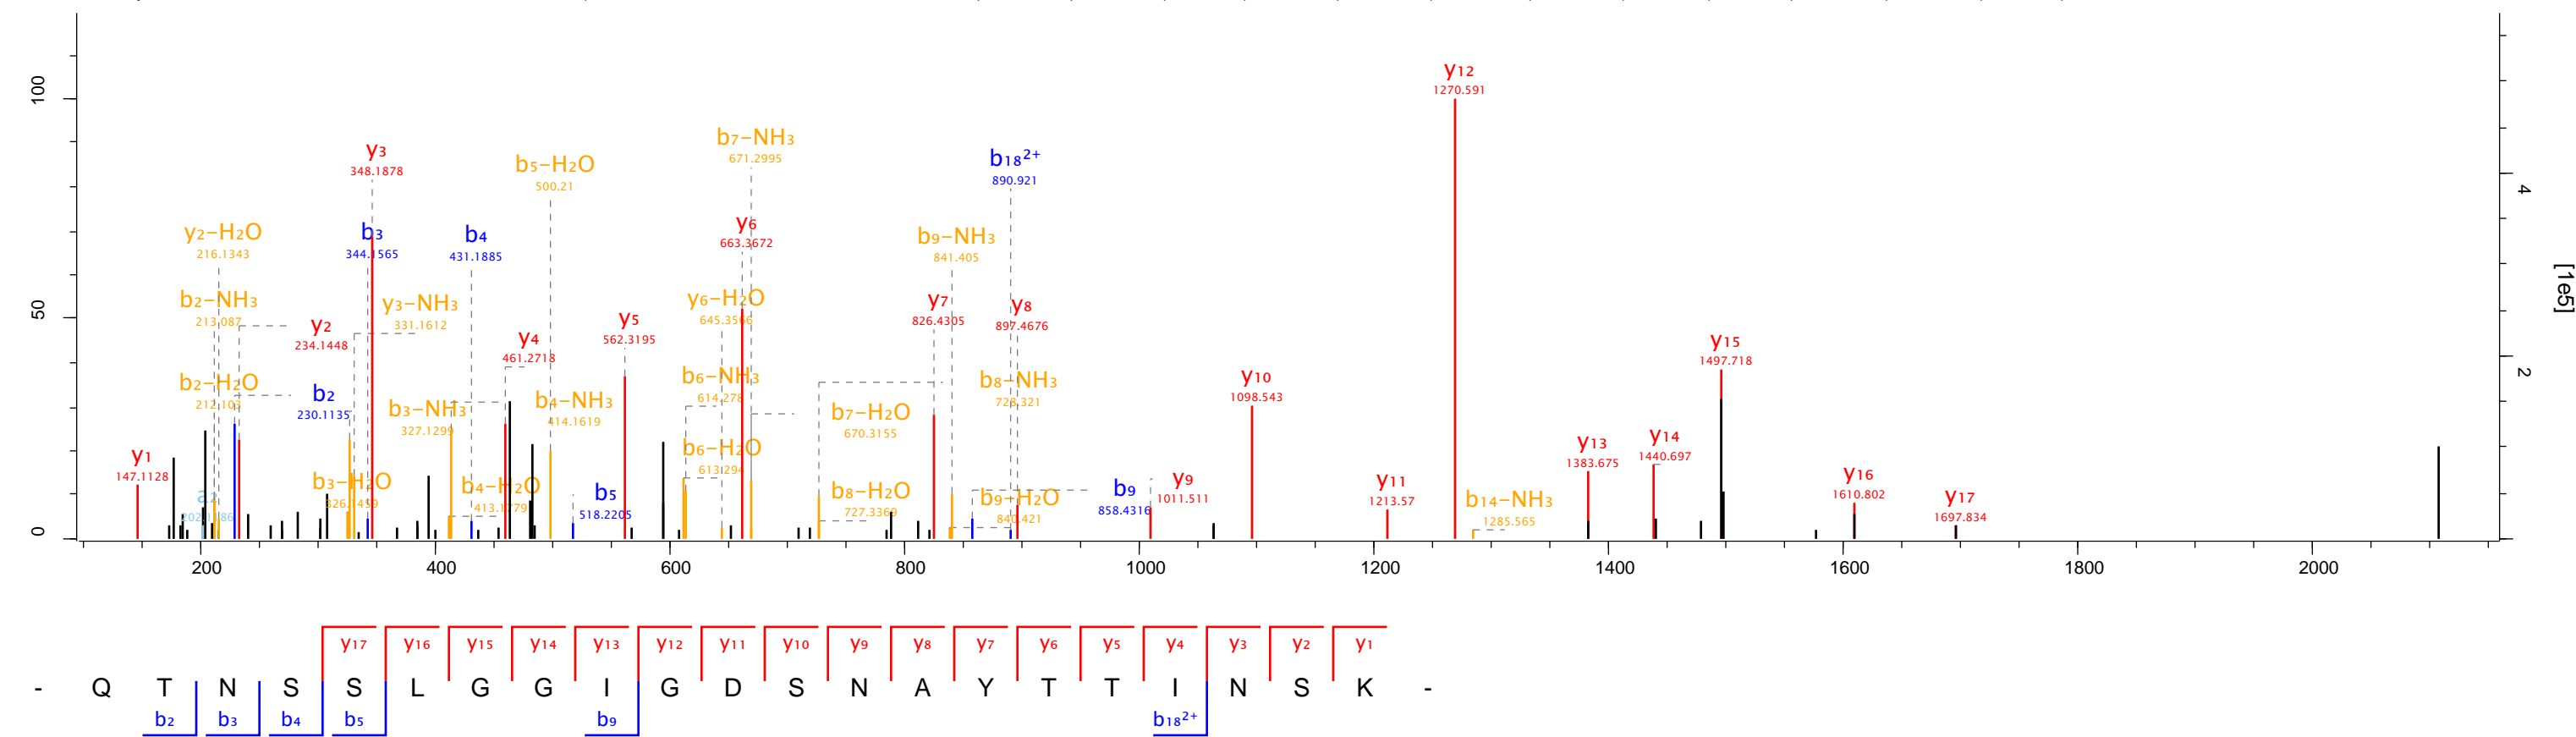

20140827\_EXQ00\_FaHo\_SA\_SIR2\_C 2290 FTMS; HCL 152.37 520.27 TY1B-LR3;TY1A-PL;TY1A-LR2;TY1A-ER1;TY1A-DR6;TY1B-OL;TY1B-LR4;TY1B-LR2;TY1B-PL;TY1B-ER1;TY1B-PR3;TY1A-PR1;TY1A-A;TY1A-DR4;TY1B-H;TY1B-GR2;TY1B-MR2;TY1B-ER2;TY1B-OR;TY1B-BR;TY1B-DR1;TY1B-NL2

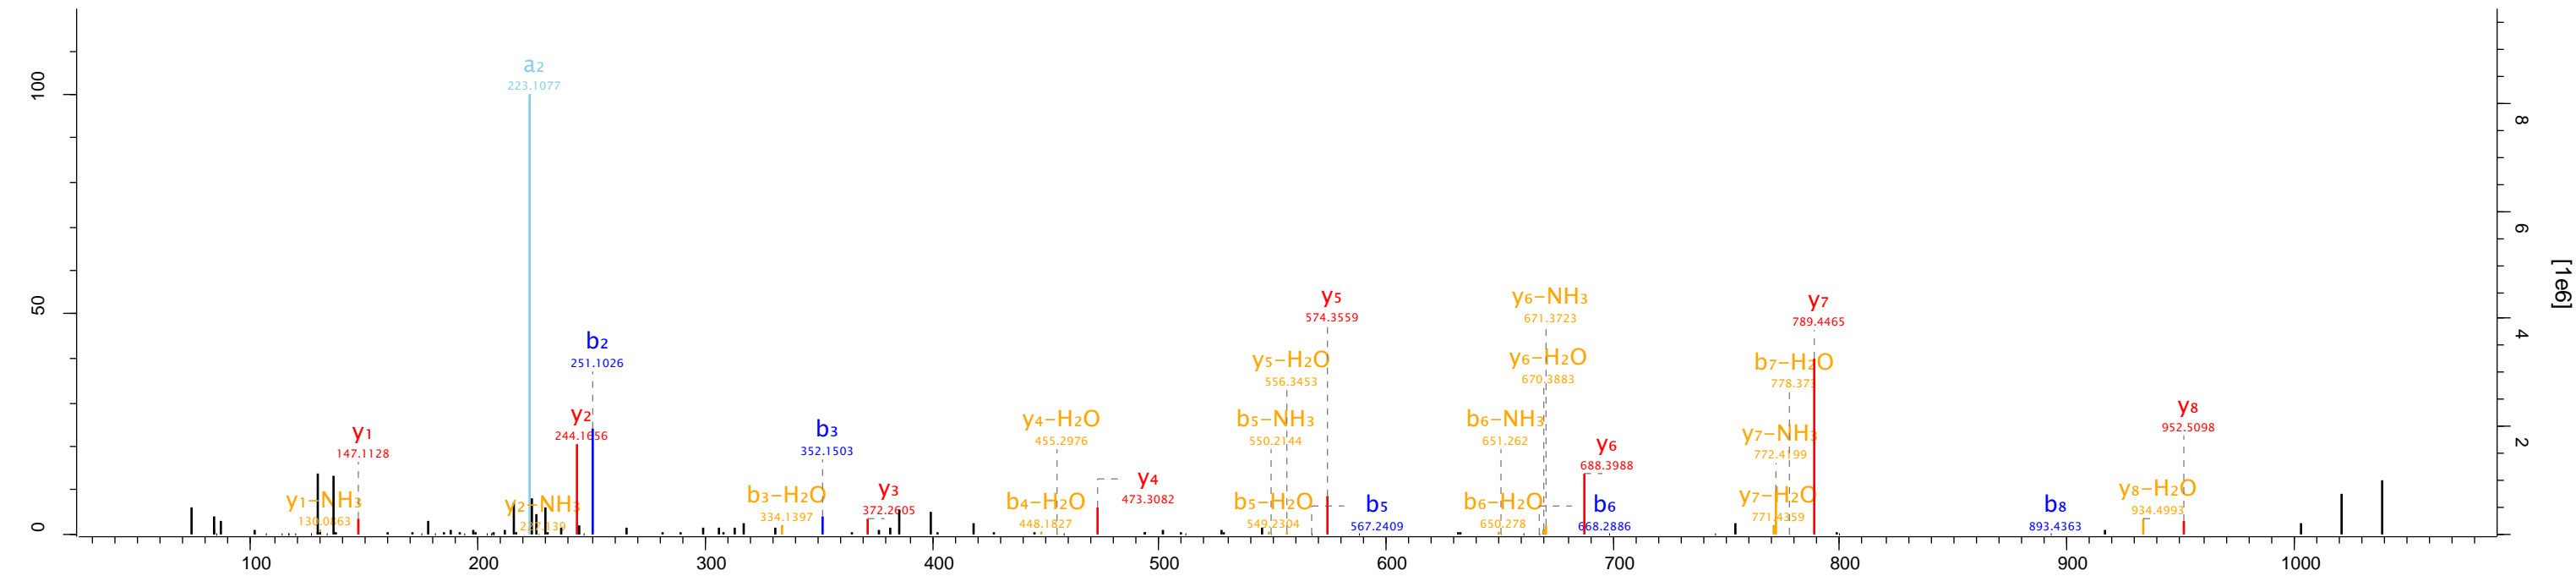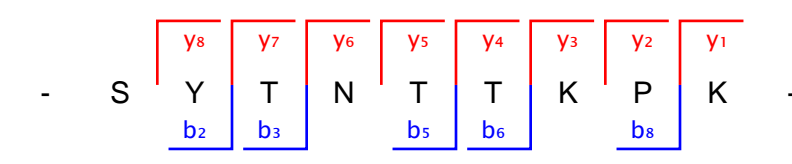

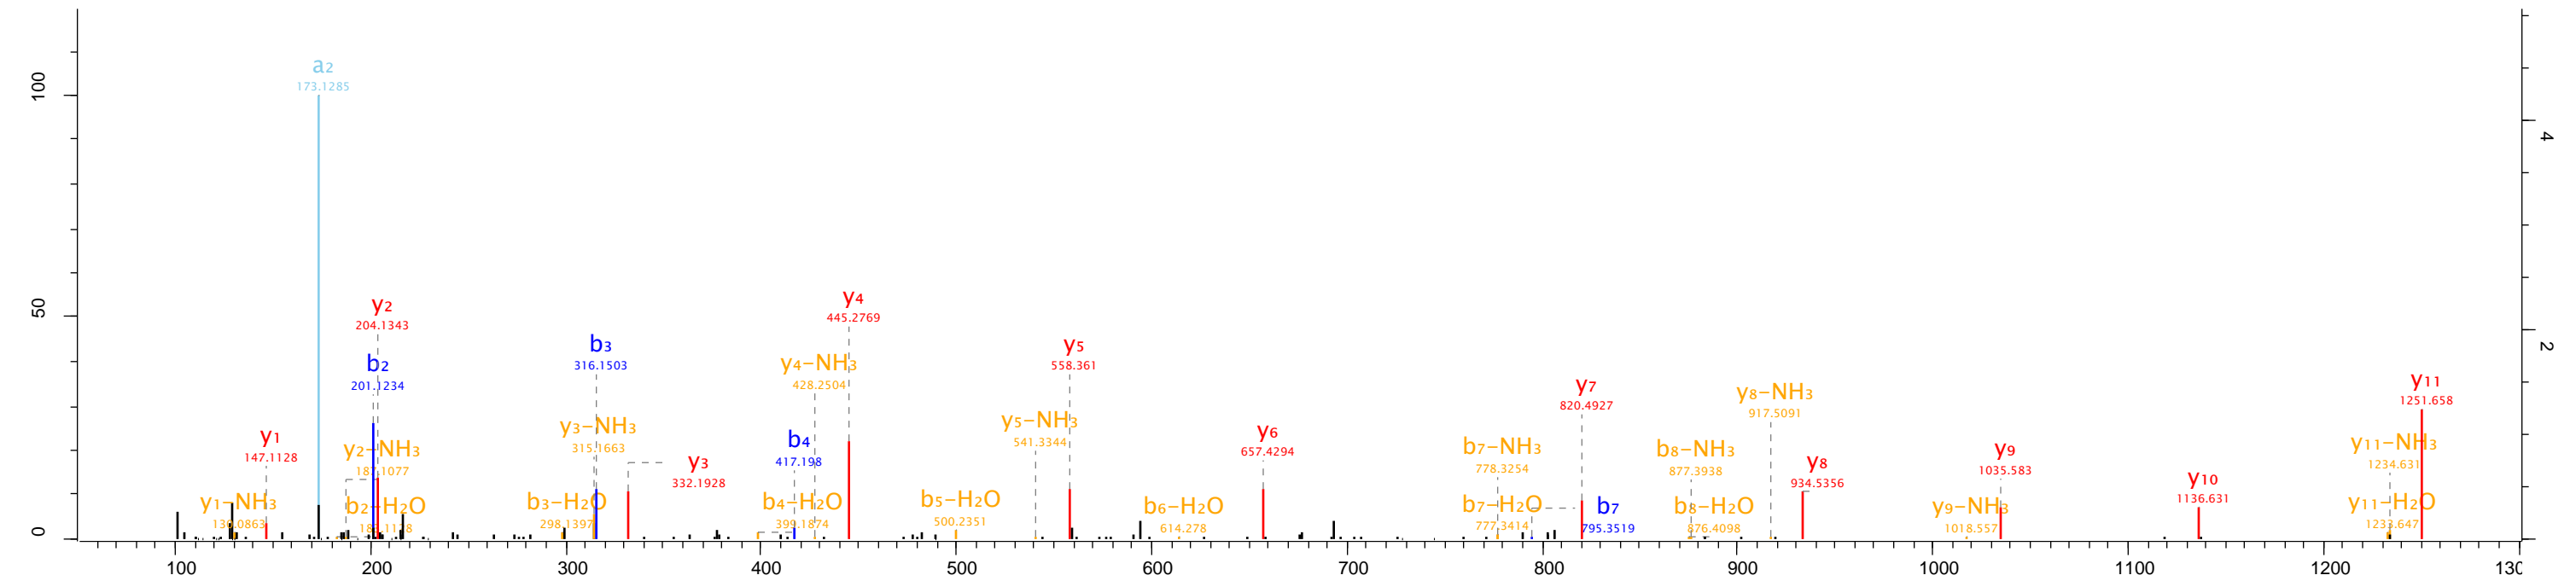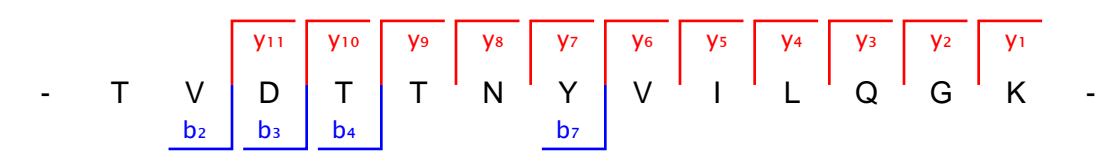

20140827\_EXQ00\_FaHo\_SA\_SIR2\_03

5676 FTMS; HCD 112.96 821.42 TY1B-LR3;TY1B-OL;TY1B-LR4;TY1B-LR2;TY1B-PL;TY1B-ER1;TY1B-PR3;TY1B-H;TY1B-GR2;TY1B-MR2;TY1B-ER2;TY1B-OR;TY1B-BR;TY1B-DR1;TY1B-LR1;TY1B-DR3;TY1B-A;TY1B-BL;TY1B-MR1

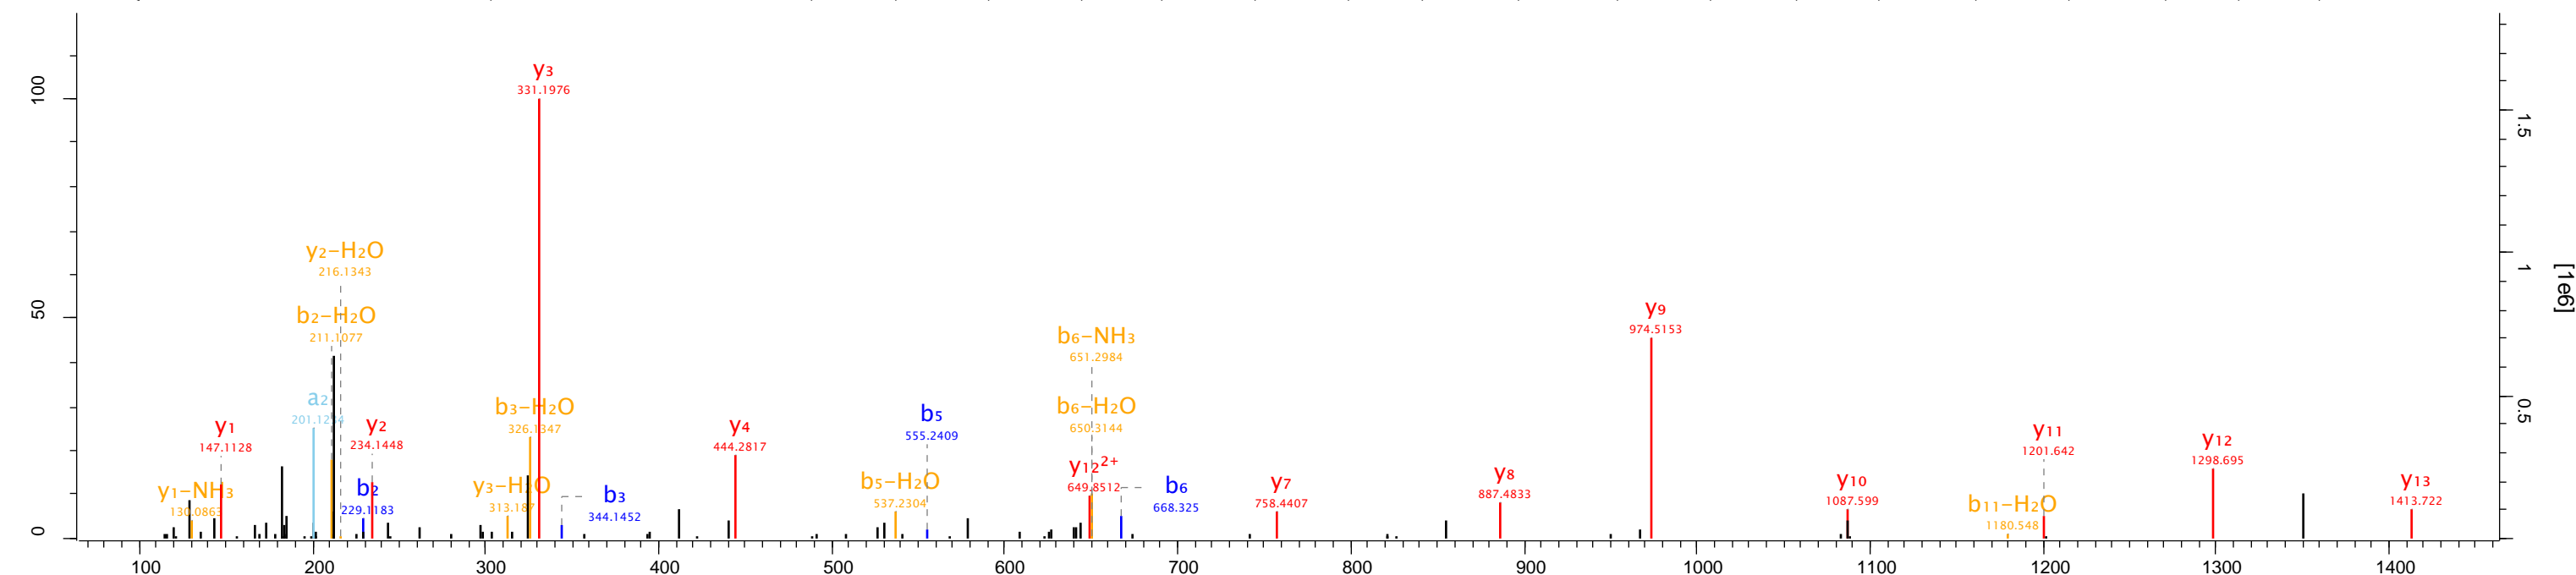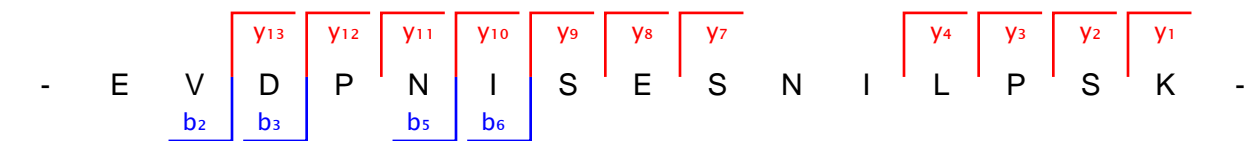

Raw file 20140827\_EXQ00\_FaHo\_SA\_SNF2\_01 Scan 6877 Method FTMS; HCD Score 96.02 m/z 727.68 Gene names RPS14B;RPS14A

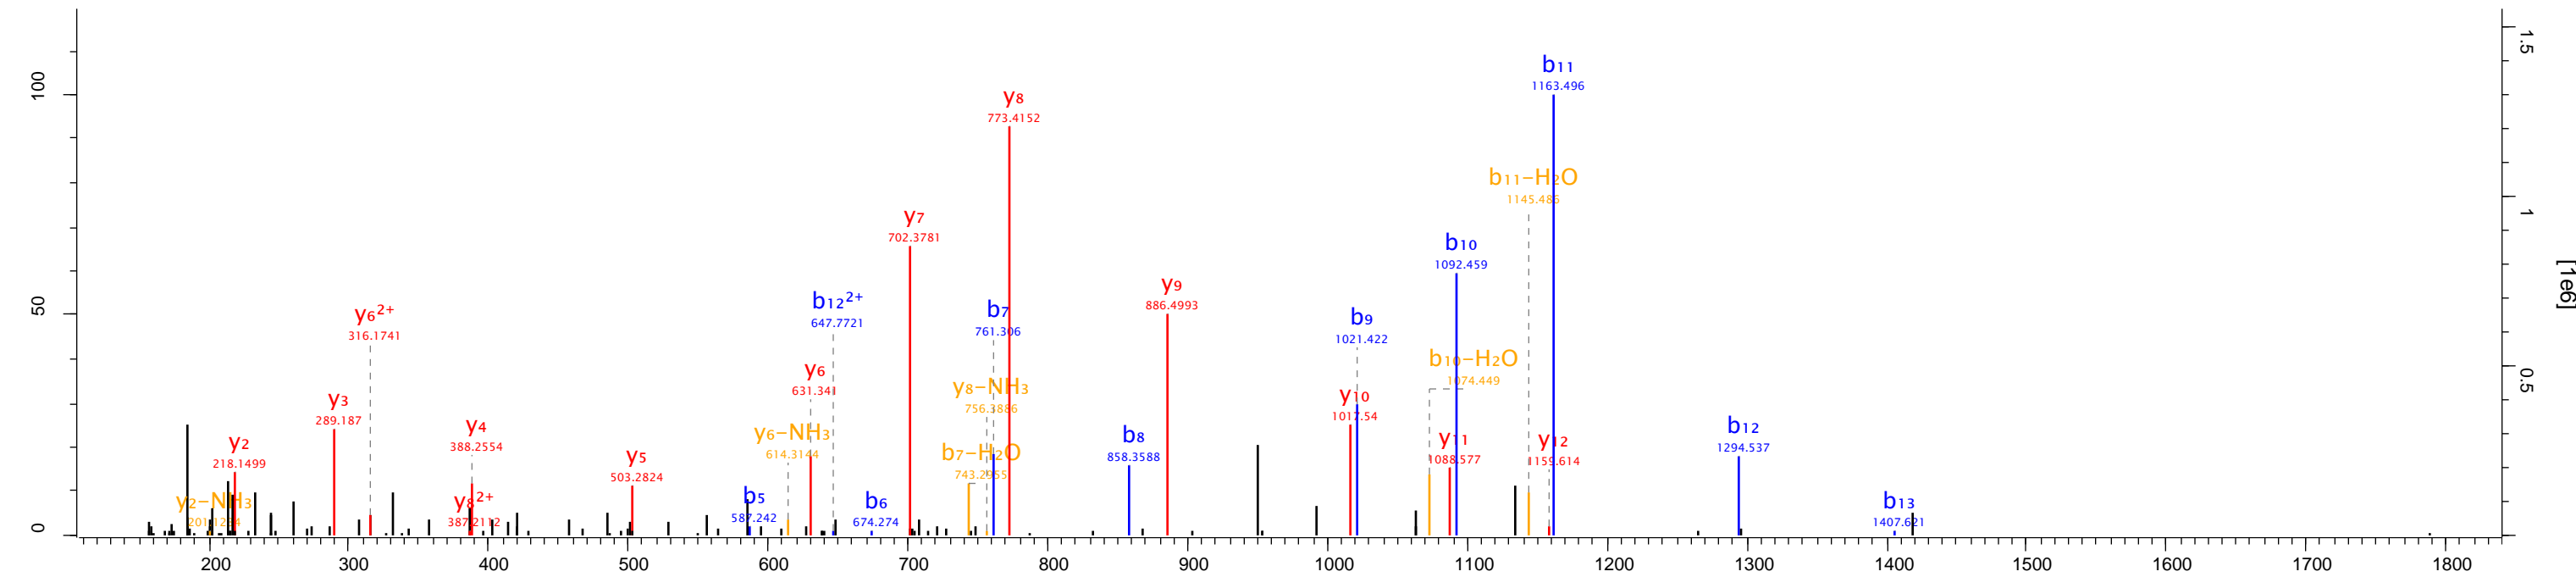

- A D R D E S S P Y A A M L A A Q D V A A K -

b<sub>5</sub>
b<sub>6</sub>
b<sub>7</sub>
b<sub>8</sub>
b<sub>9</sub>
y<sub>12</sub>
y<sub>11</sub>
y<sub>10</sub>
y<sub>9</sub>
y<sub>8</sub>
y<sub>7</sub>
y<sub>6</sub>
y<sub>5</sub>
y<sub>4</sub>
y<sub>3</sub>
y<sub>2</sub>



Raw file 20140827\_EXQ00\_FaHo\_SA\_SNF2\_02 Scan 2995 Method FTMS; HCD Score 61.34 m/z 422.21 Gene names GUK1

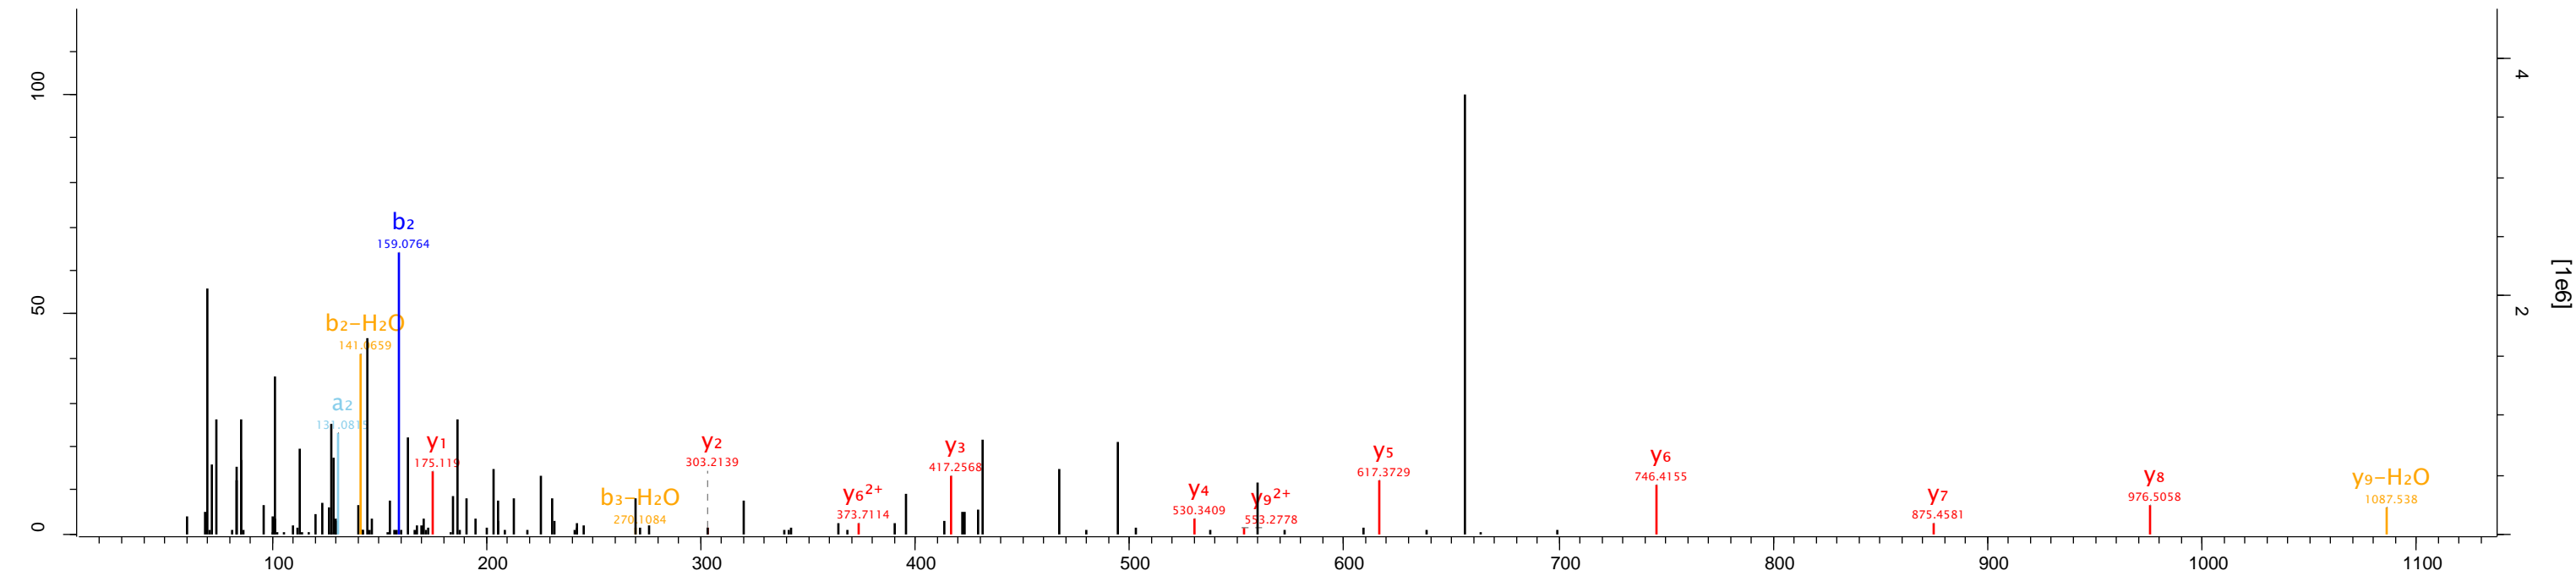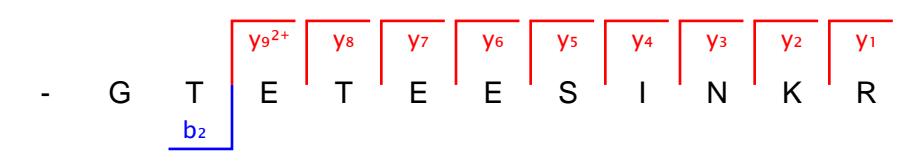

Raw file 20140827\_EXQ00\_FaHo\_SA\_SNF2\_02 Scan 5411 Method FTMS; HCD Score 179.1 m/z 546.77 Gene names RPS14B;RPS14A

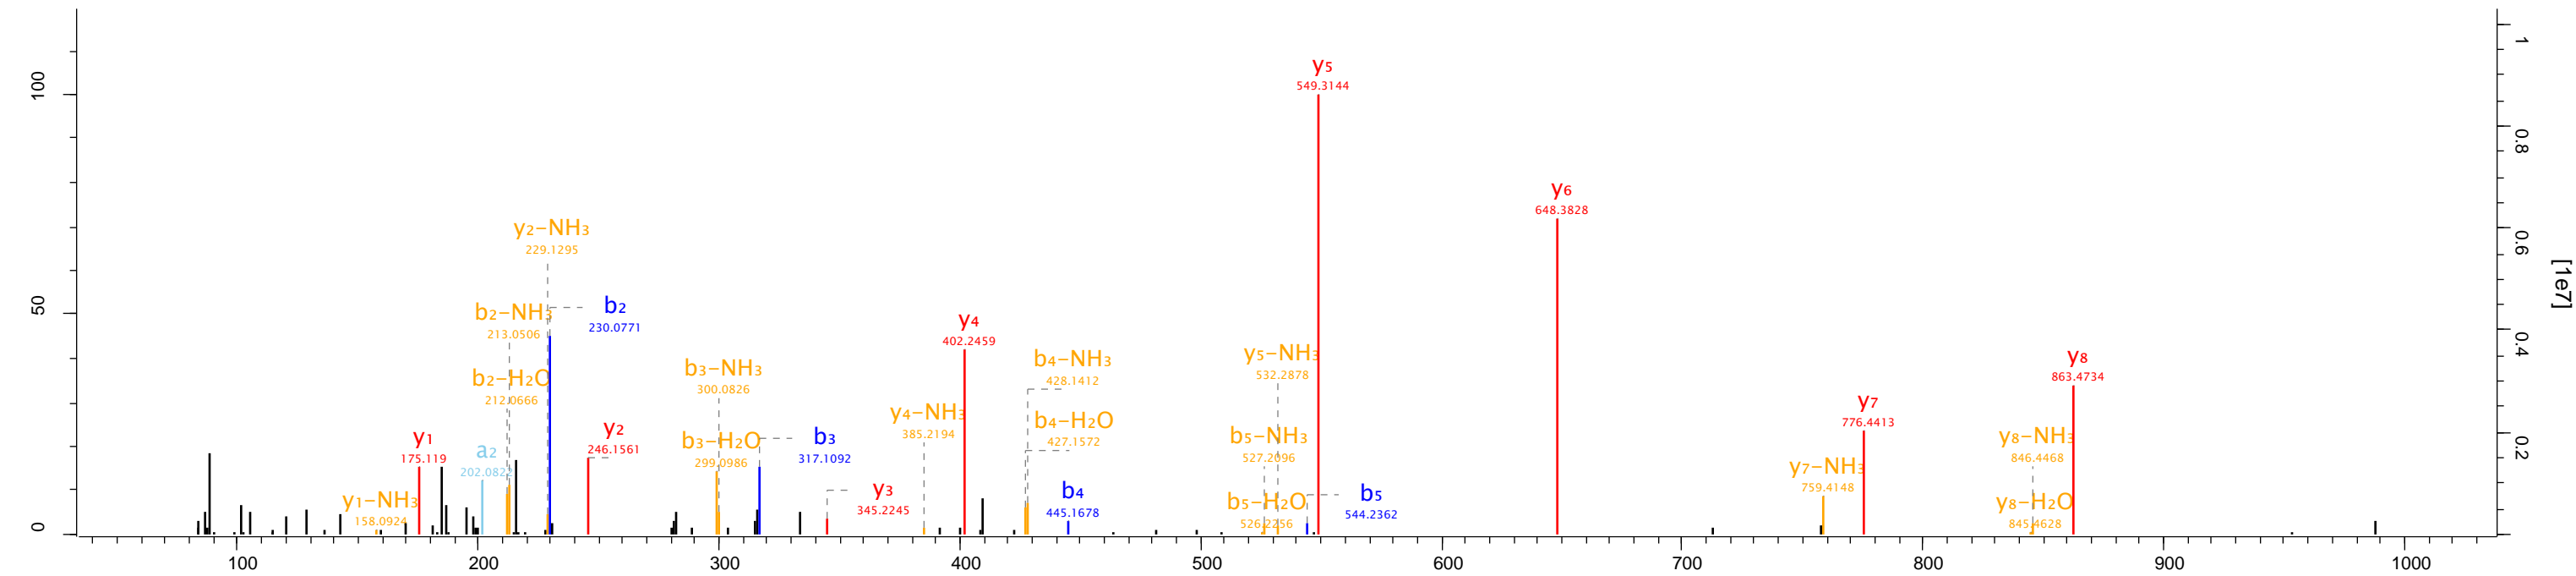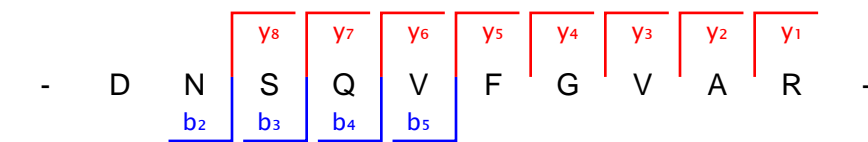

Raw file 20140827\_EXQ00\_FaHo\_SA\_SNF2\_03 Scan 3980 Method FTMS; HCD Score 132.08 m/z 423.73 Gene names RPL24A;RPL24B

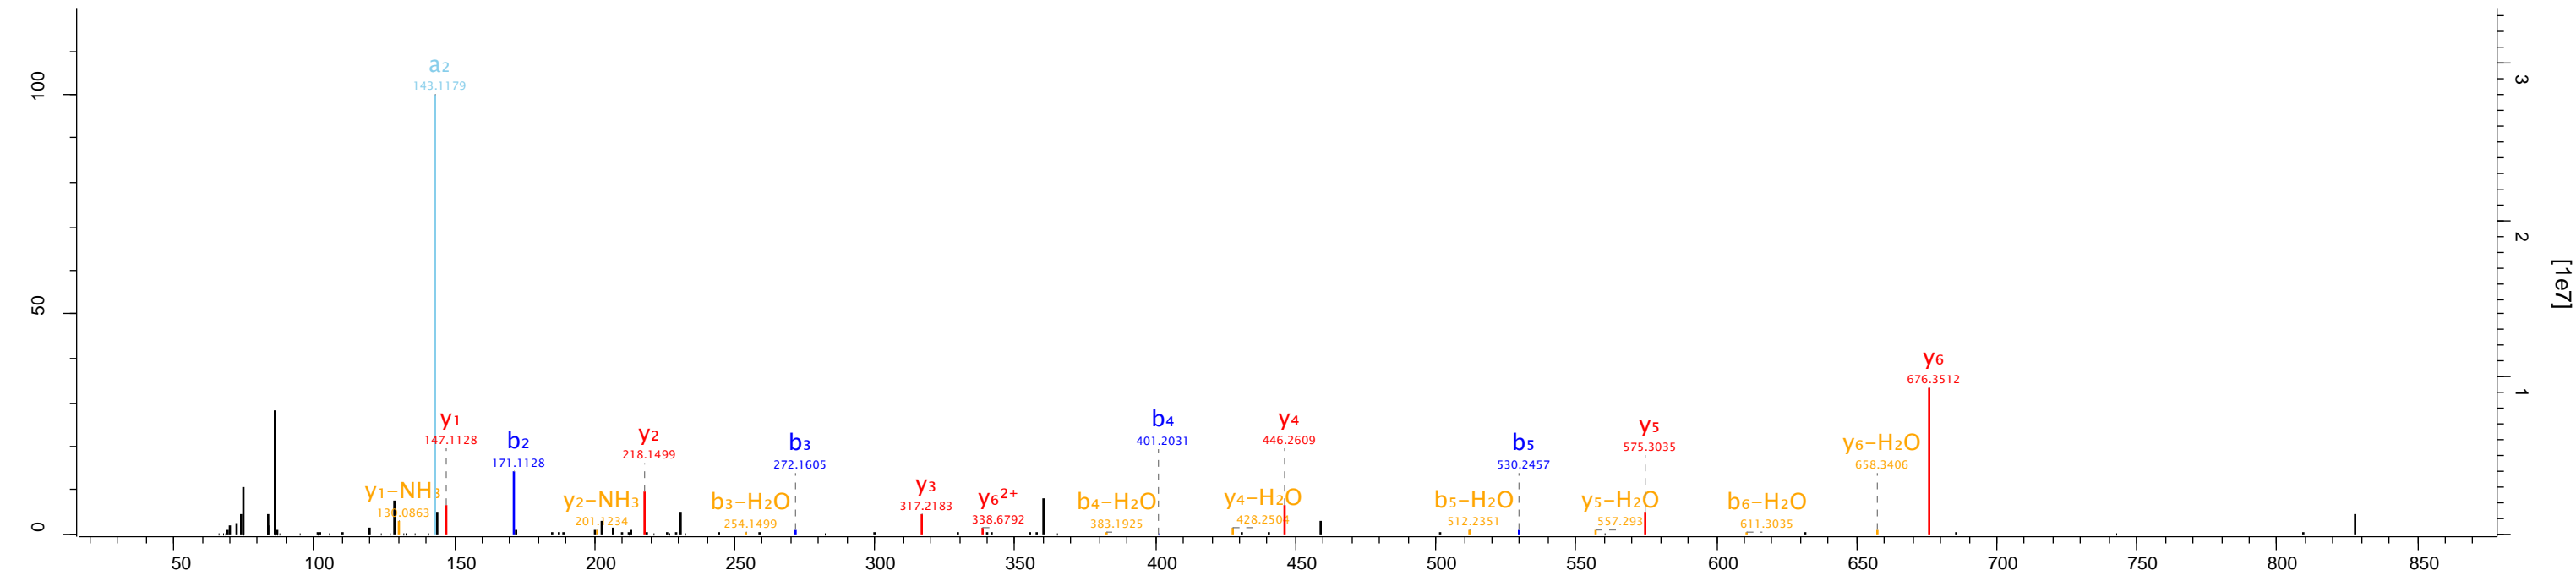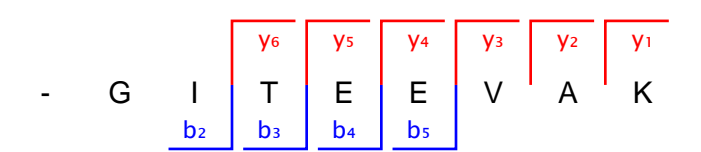

Raw file 20140827\_EXQ00\_FaHo\_SA\_SNF2\_03 Scan 5283 Method FTMS; HCD Score 61.78 m/z 514.8 Gene names RPL7A;RPL7B

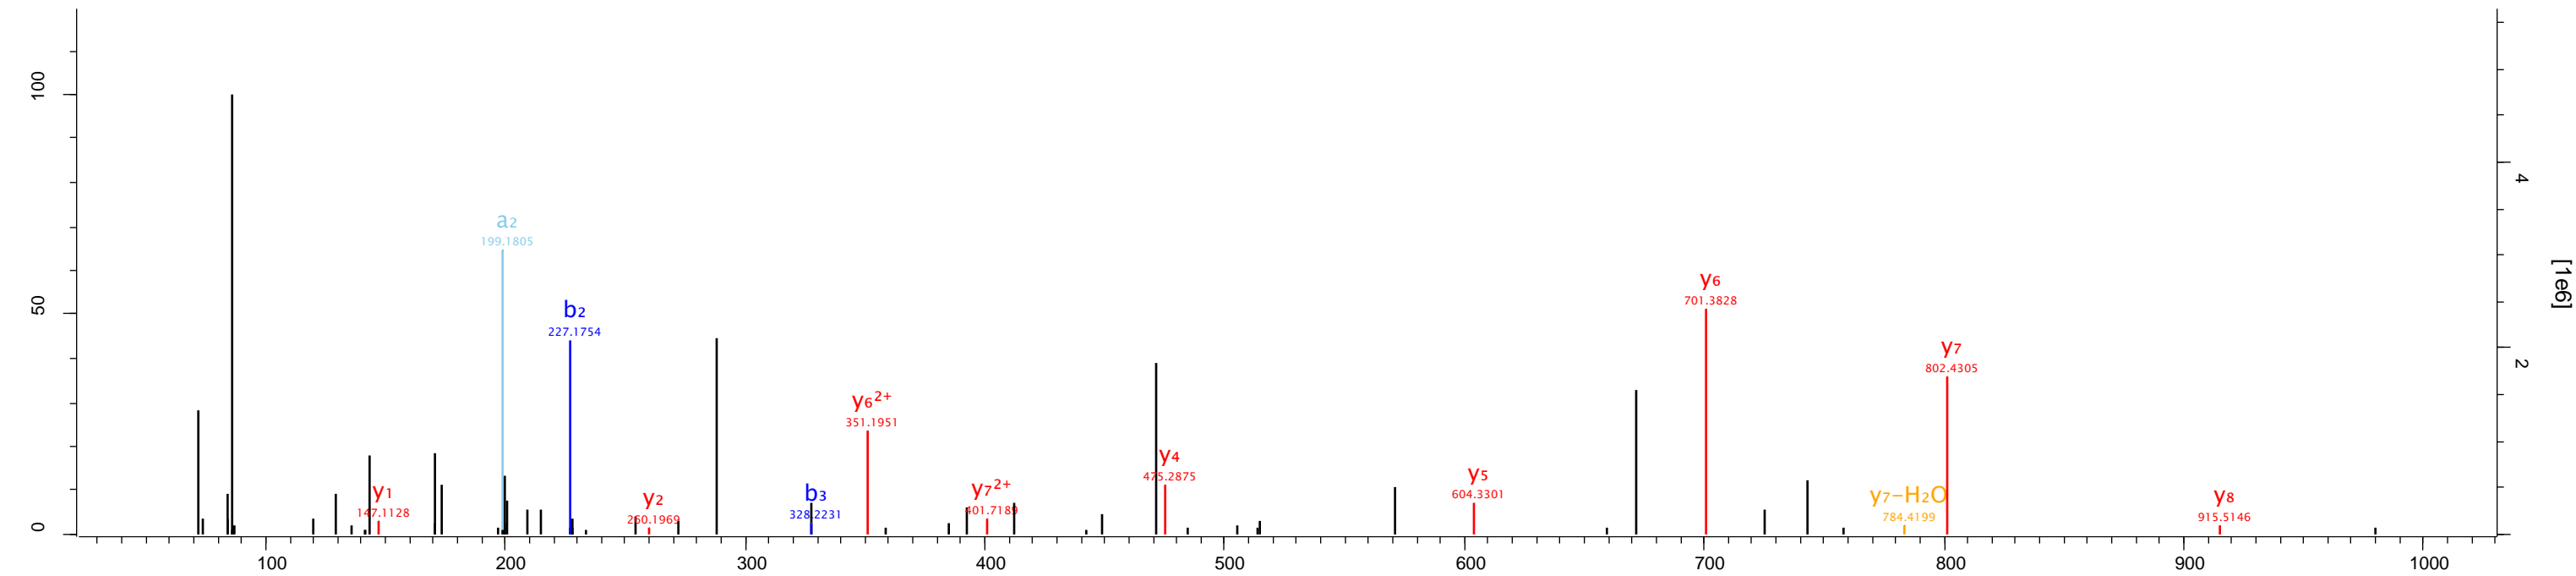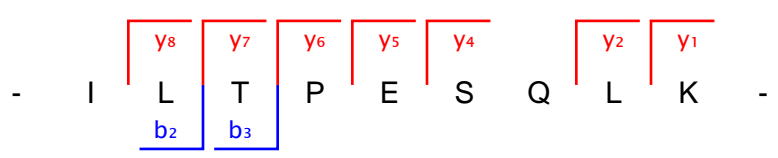

Raw file: 20140827\_EXQ00\_FaHo\_SA\_SNF2\_03  
 Scan: 5852 Method: FTMS; HCD Score: 146.11 m/z: 567.79 Gene names: RPL36A;RPL36B

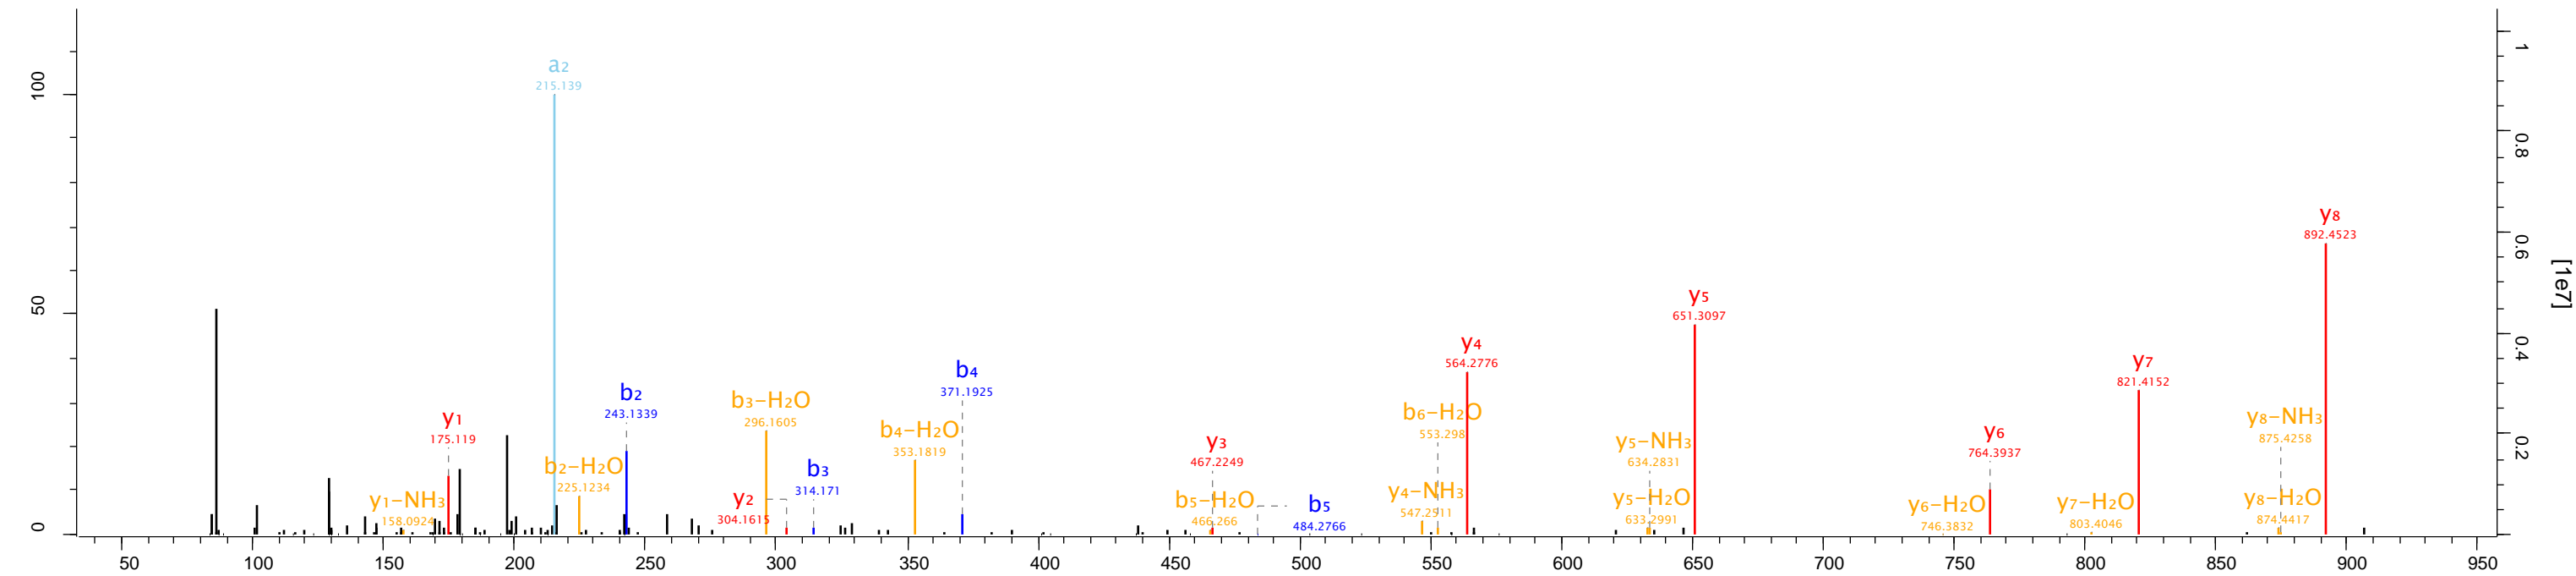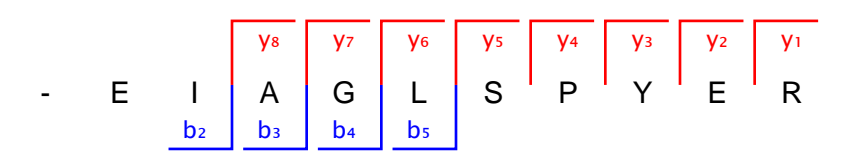

Raw file 20140827\_EXQ00\_FaHo\_SA\_SNF2\_03 Scan 6827 Method FTMS; HCD Score 166.92 m/z 816.89 Gene names ARF1;ARF2

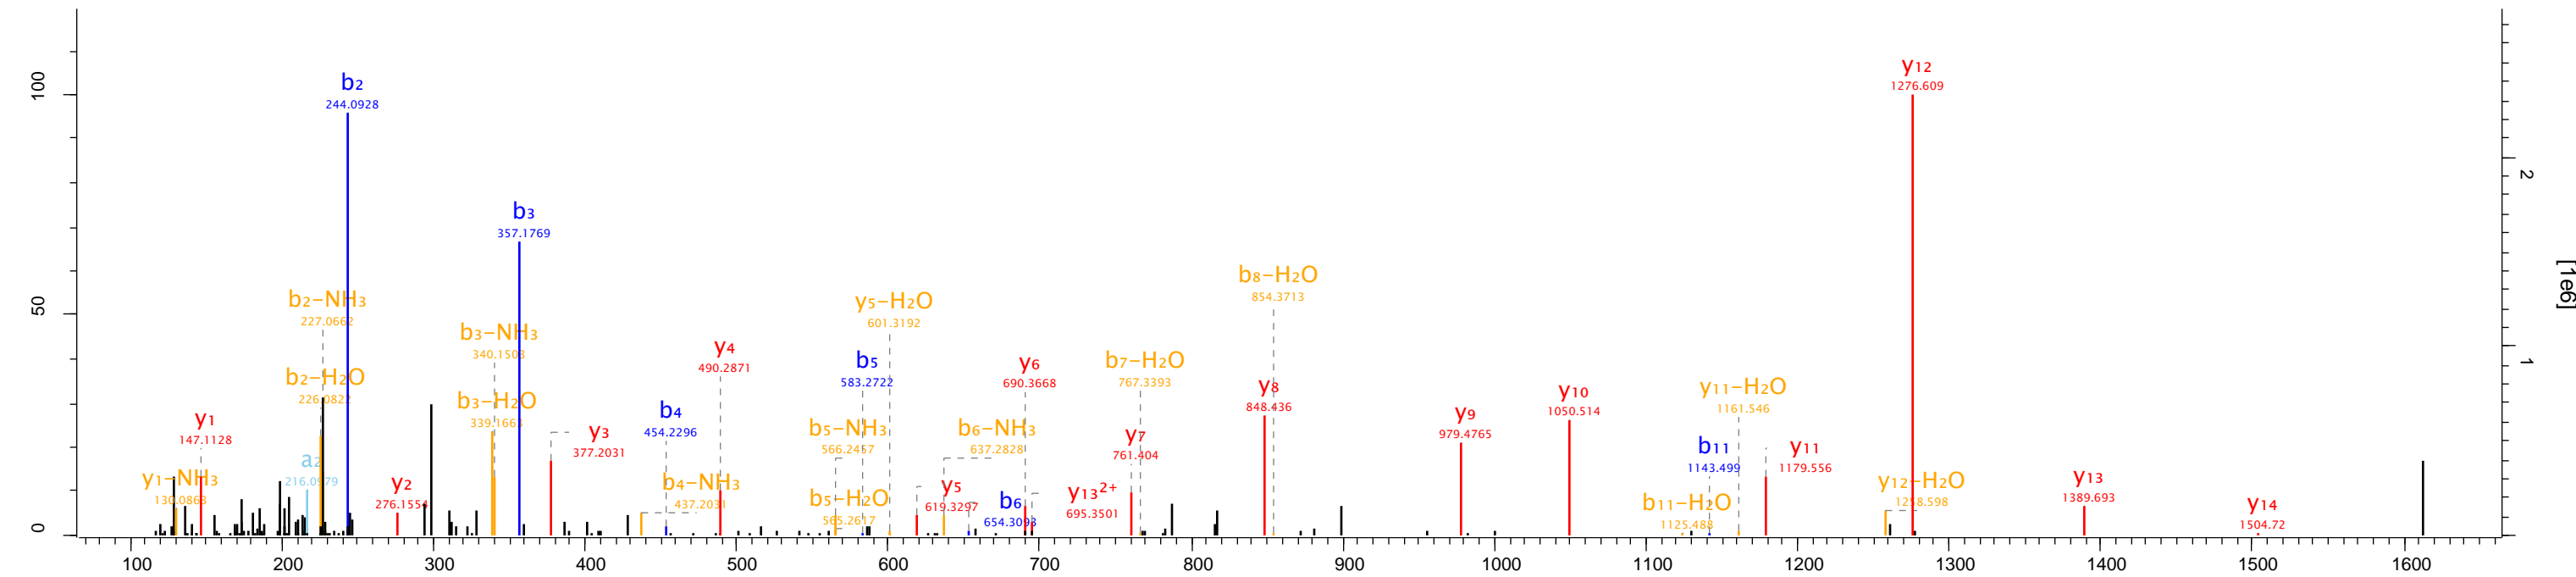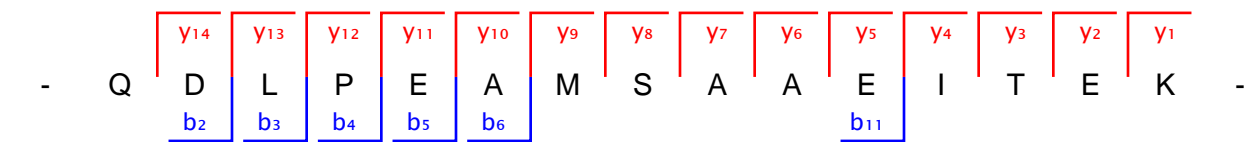

Raw file 20140827\_EXQ00\_FaHo\_SA\_SPP1\_01 Scan 3643 Method FTMS; HCD Score 158.58 m/z 786.87 Gene names RPL7A;RPL7B

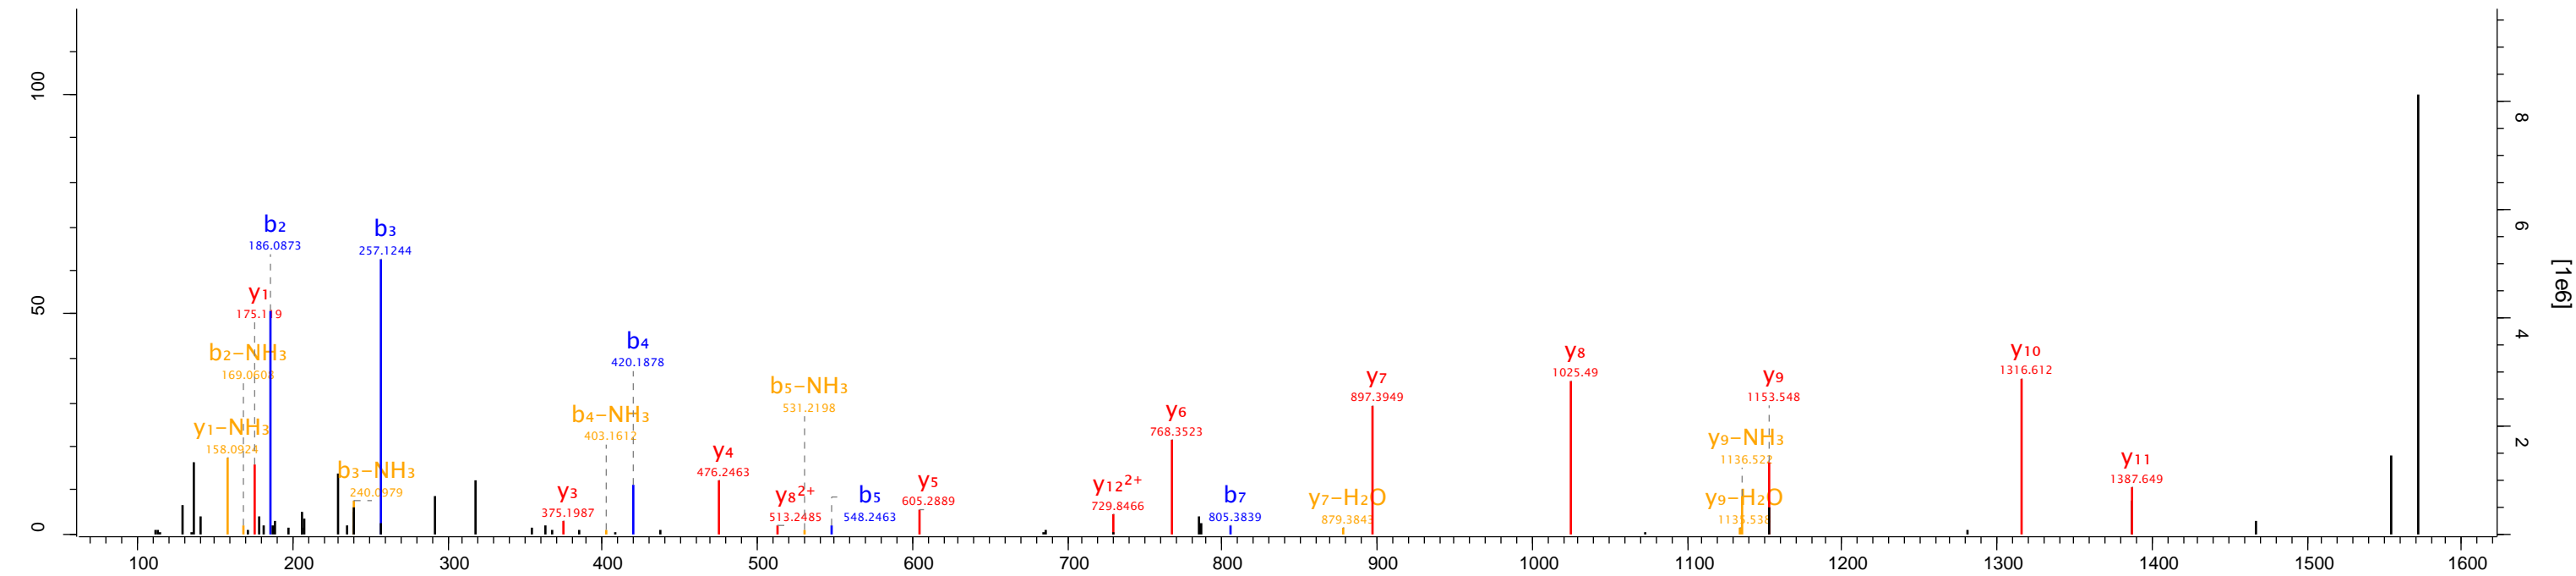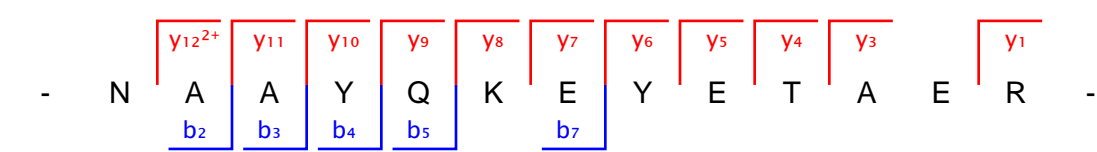

Raw file 20140827\_EXQ00\_FaHo\_SA\_SPP1\_01 Scan 5229 Method FTMS; HCD Score 160.18 m/z 643.83 Gene names RPL17B

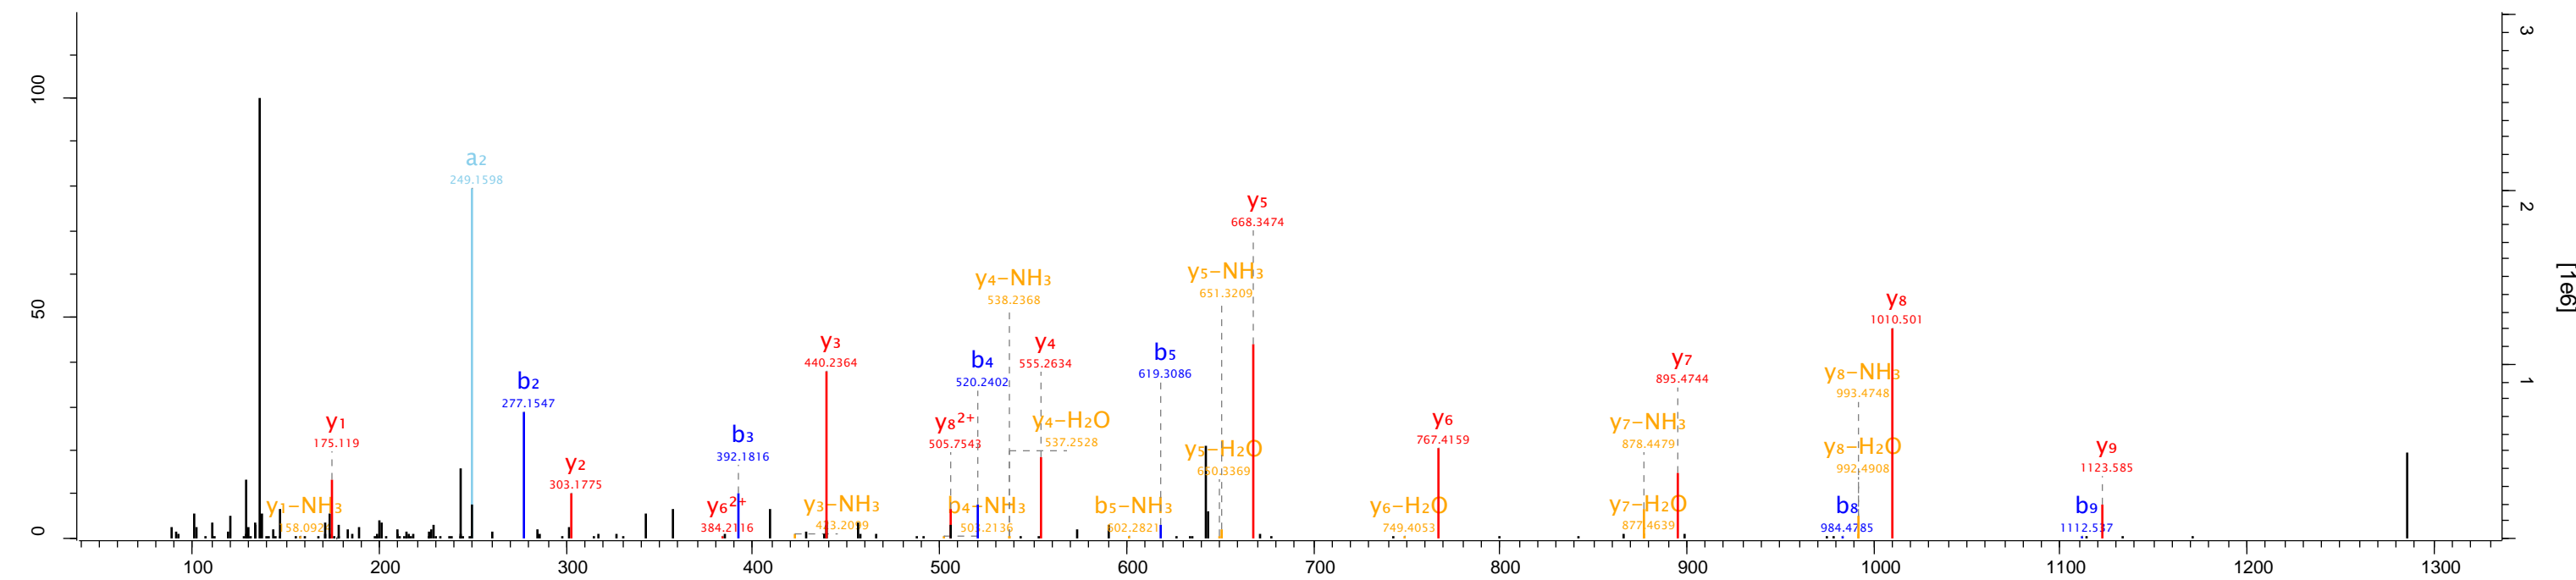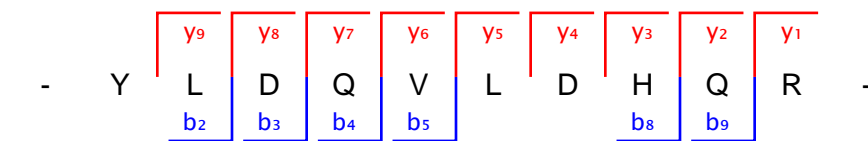



Raw file 20140827\_EXQ00\_FaHo\_SA\_SPP1\_01 Scan 6414 Method FTMS; HCD Score 118.51 m/z 808.85 Gene names CAF20

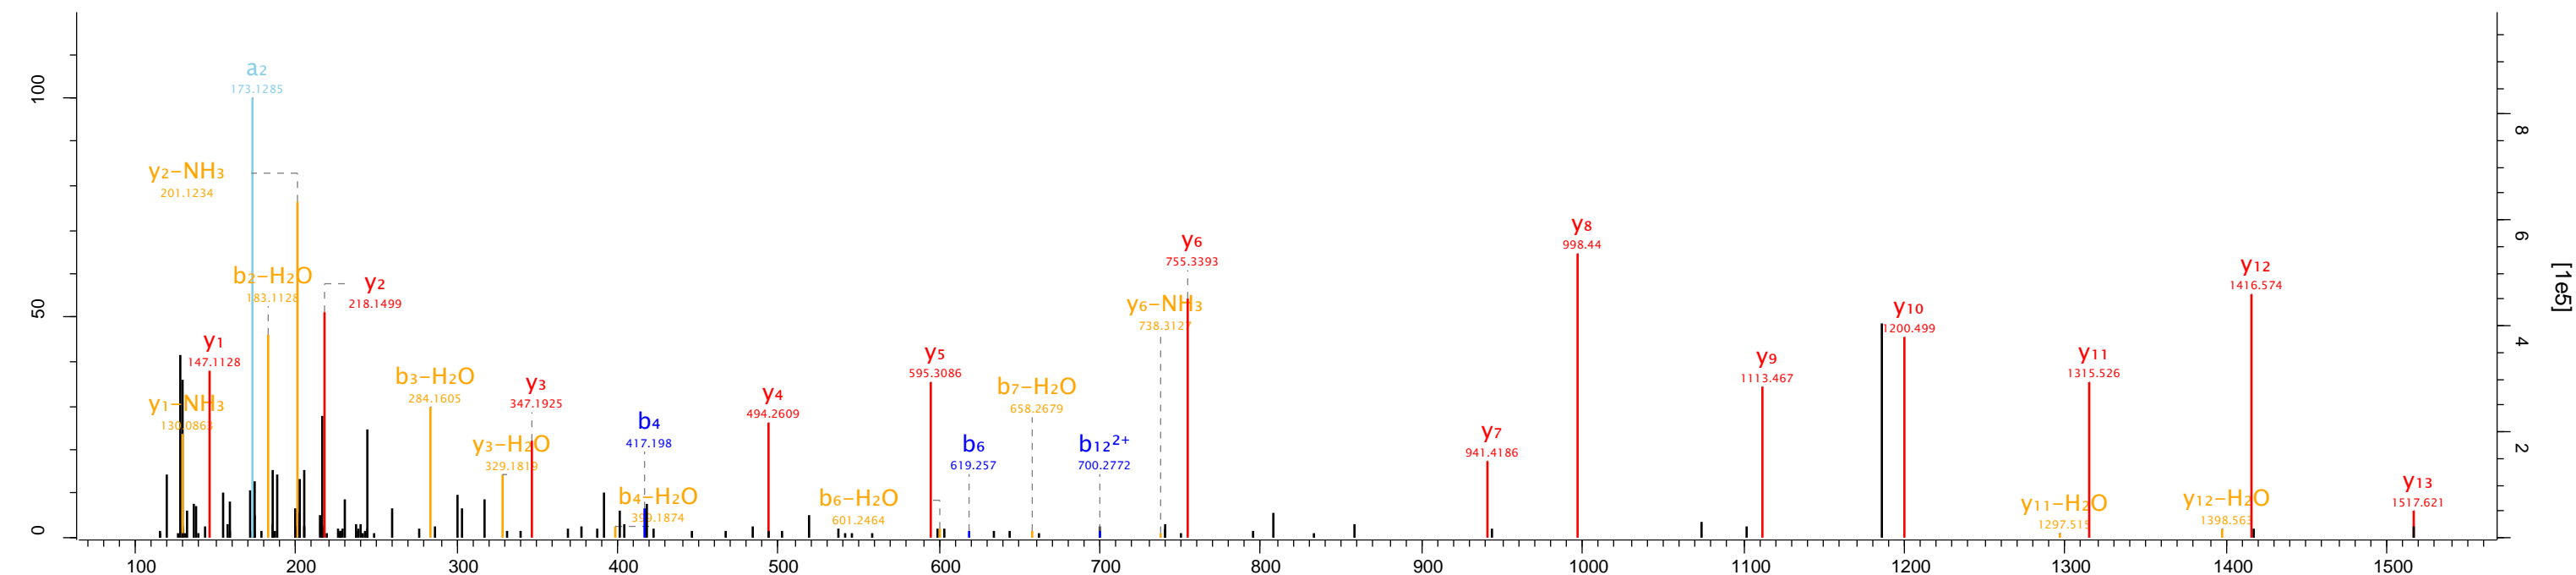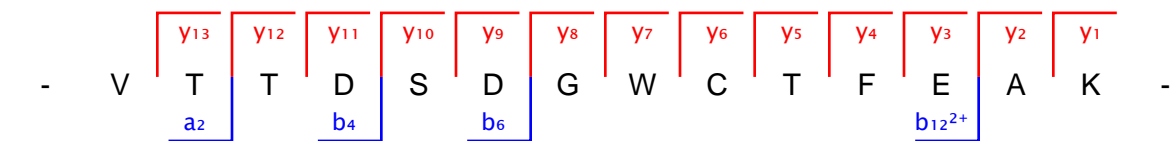

Raw file 20140827\_EXQ00\_FaHo\_SA\_SPP1\_01 Scan 6441 Method FTMS; HCD Score 66.25 m/z 544.3 Gene names RPL4B;RPL4A

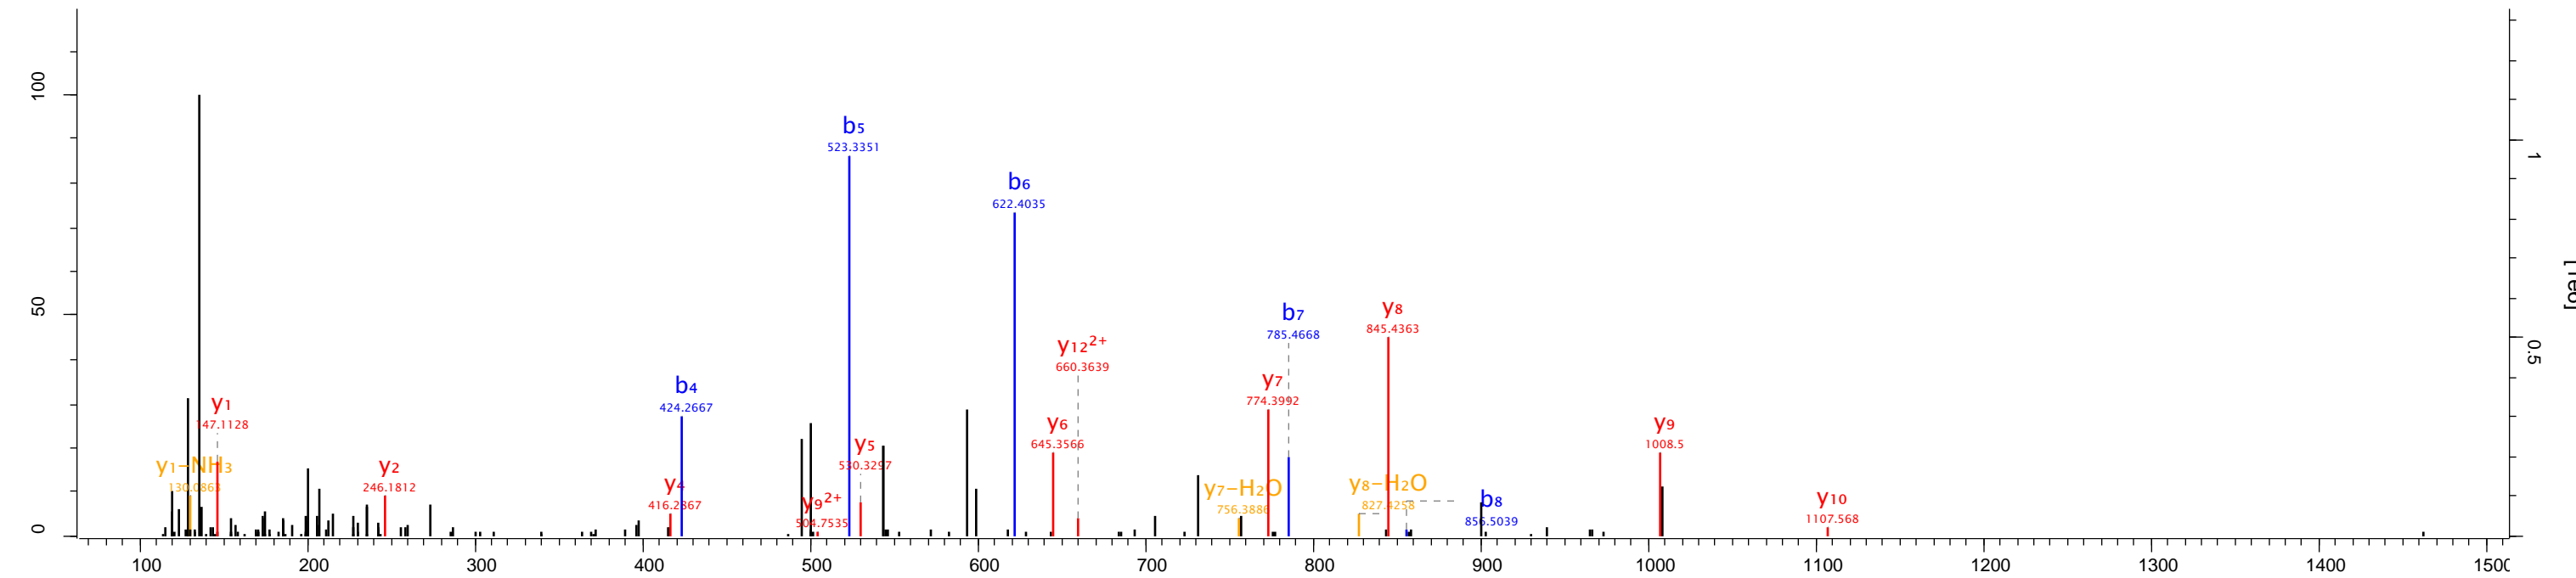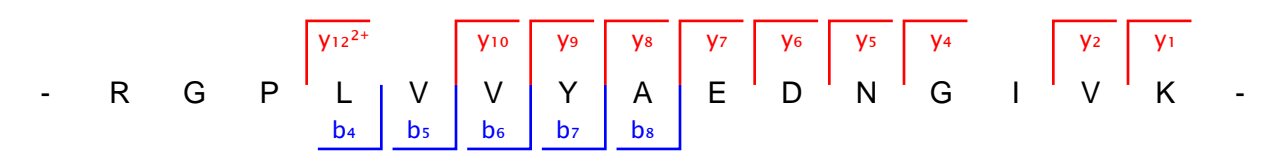

Raw file: 20140827\_EXQ00\_FaHo\_SA\_SPP1\_02  
 Scan: 4370 Method: FTMS; HCD Score: 103.83 m/z: 433.24 Gene names: RPL7A;RPL7B

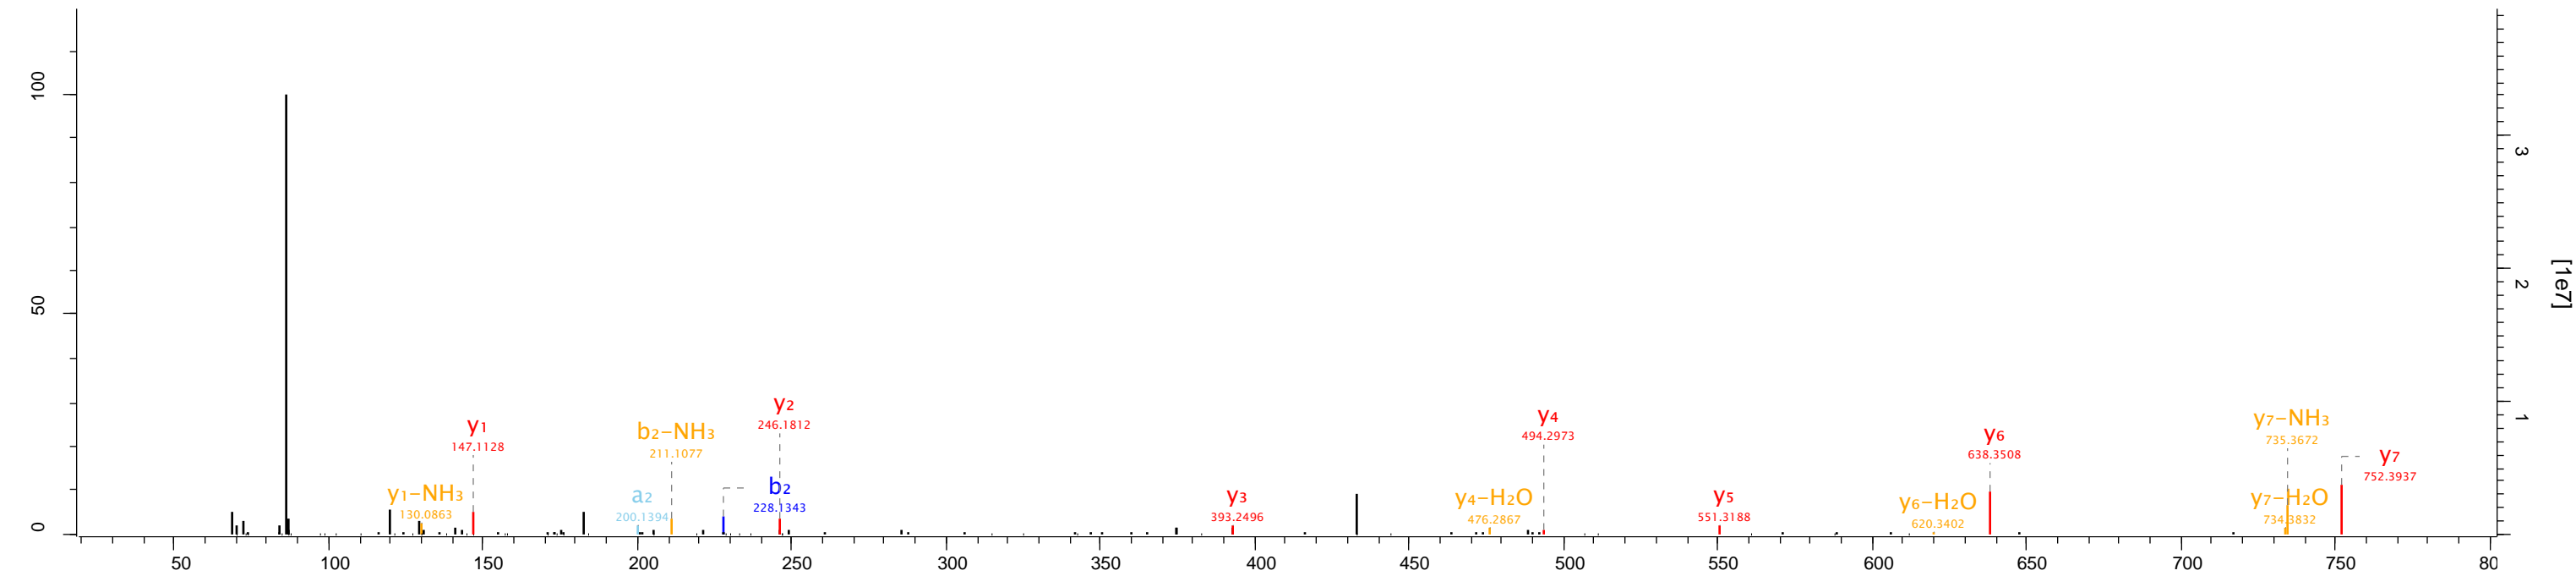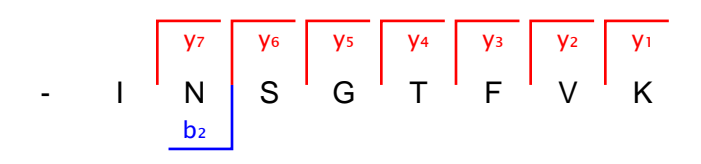

Raw file 20140827\_EXQ00\_FaHo\_SA\_SPP1\_02 Scan 4436 Method FTMS; HCD Score 125.57 m/z 490.77 Gene names RPL21A;RPL21B

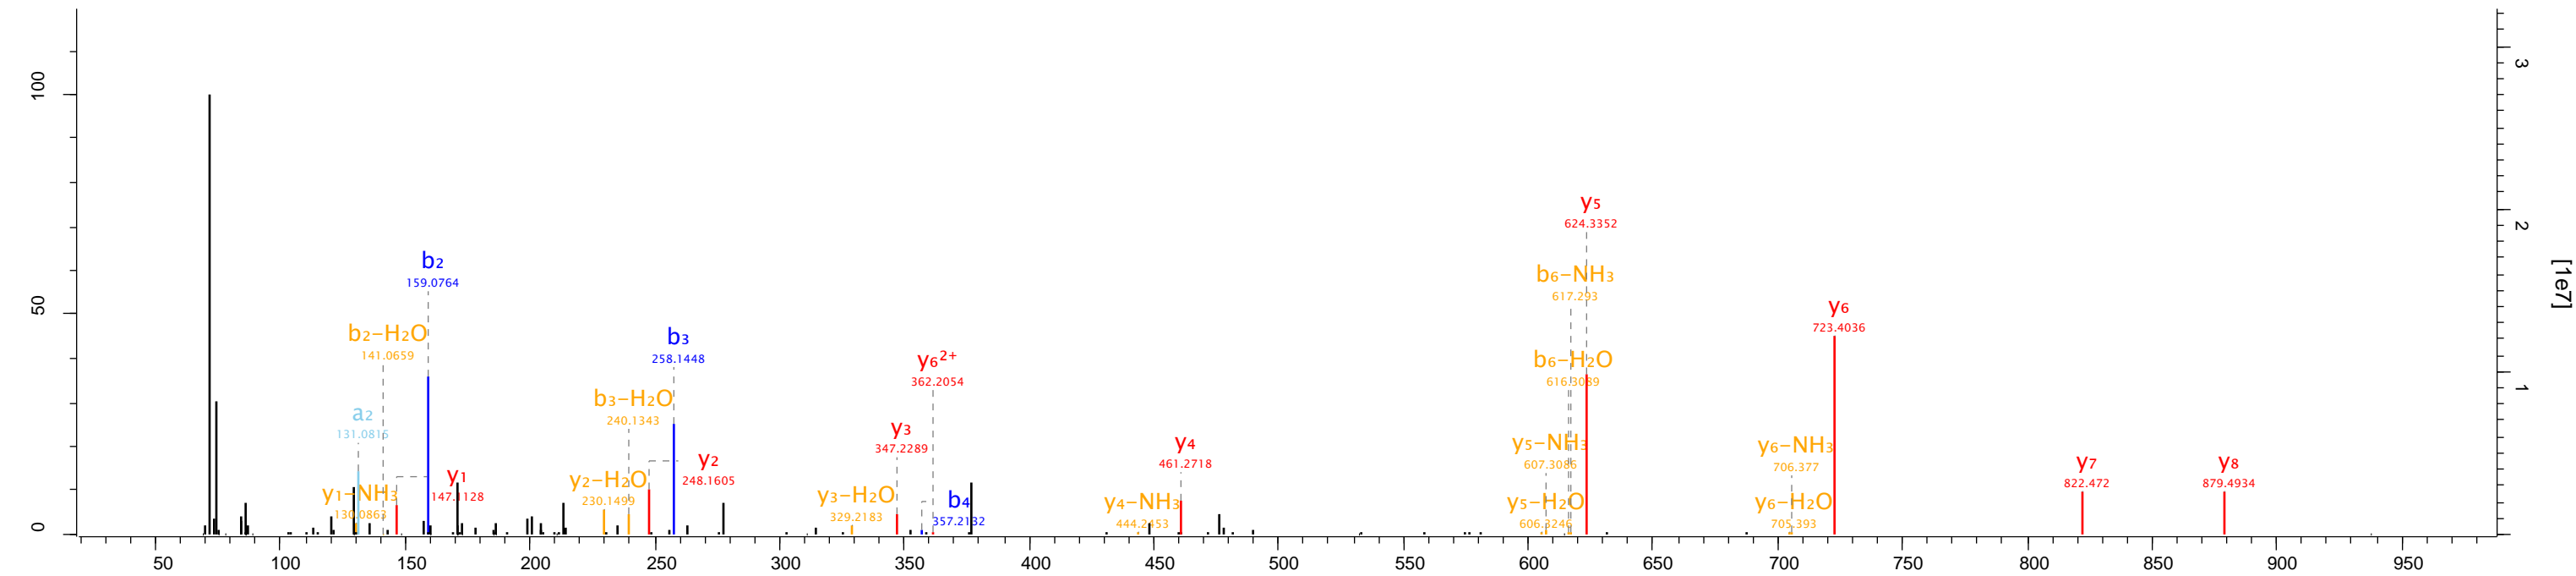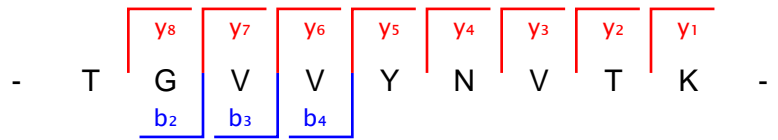

Raw file 20140827\_EXQ00\_FaHo\_SA\_SPP1\_02 Scan 8295 Method FTMS; HCD Score 121.5 m/z 885.76 Gene names ATG33

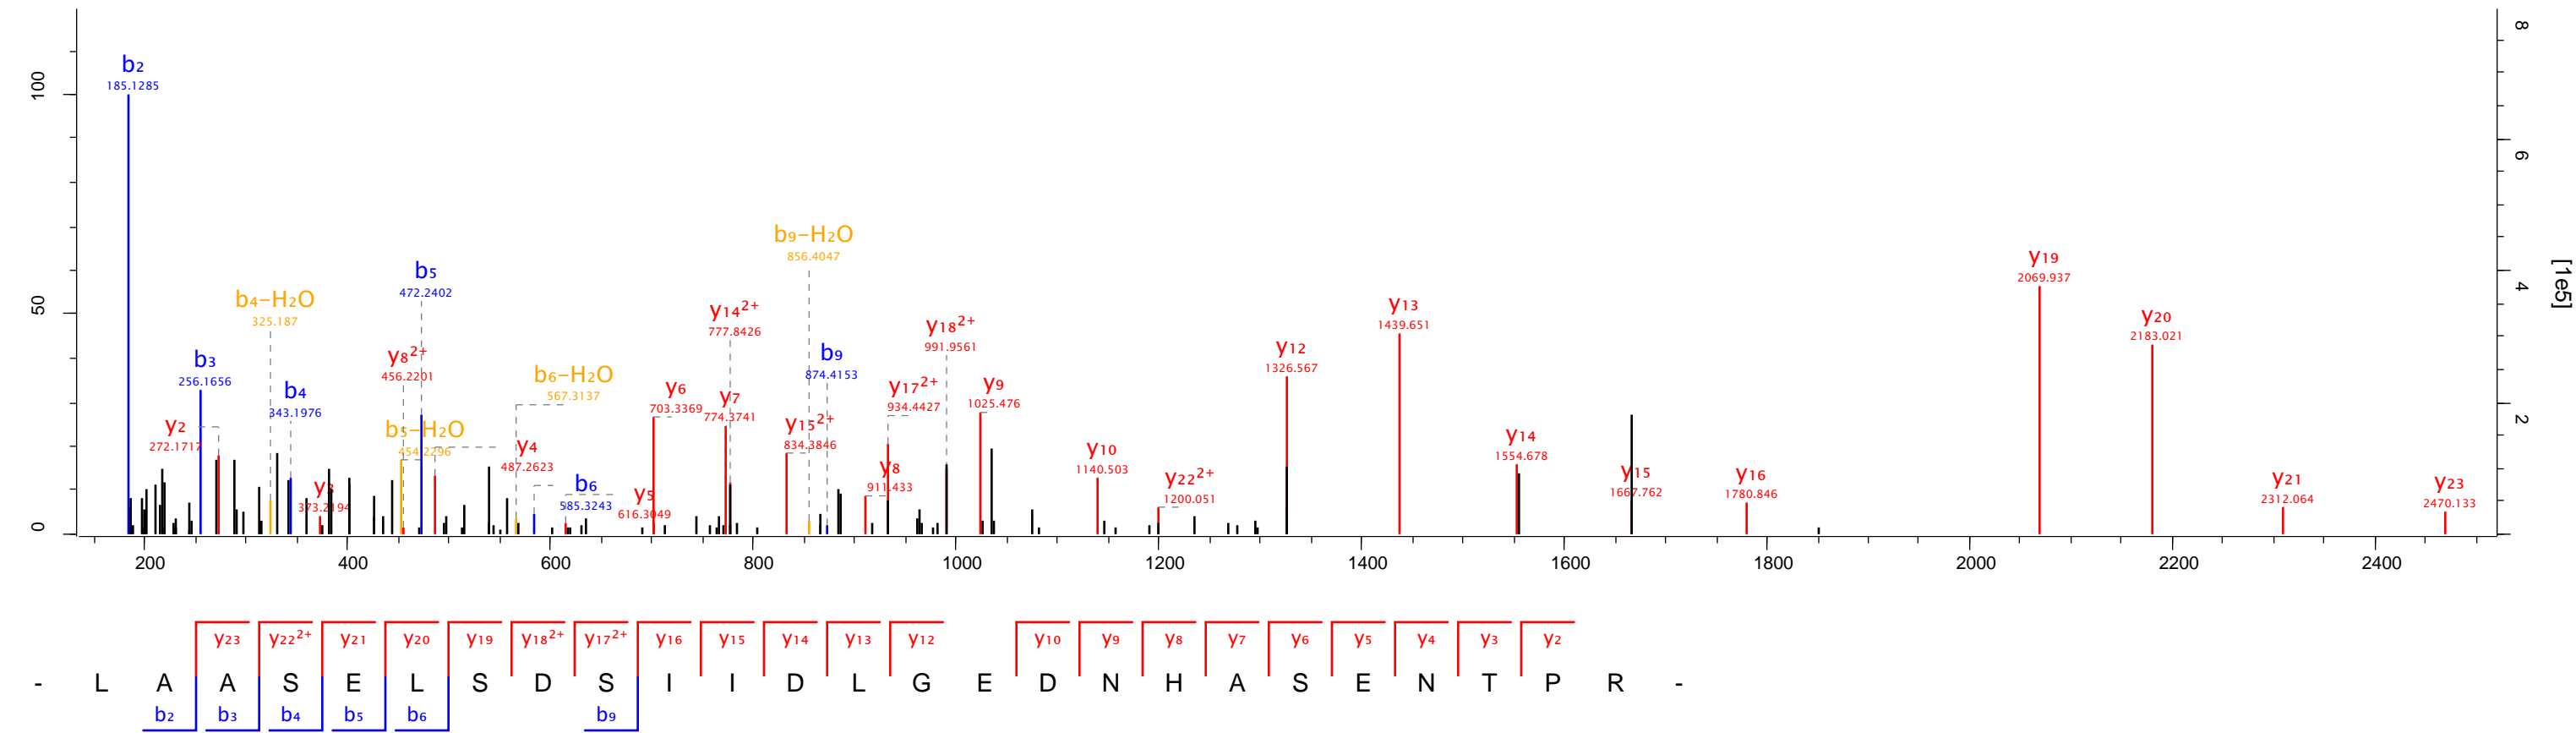

Raw file  
20140827\_EXQ00\_FaHo\_SA\_SPP1\_03

Scan 4347 Method FTMS; HCD Score 73.23 m/z 470.28 Gene names TRX2;TRX1

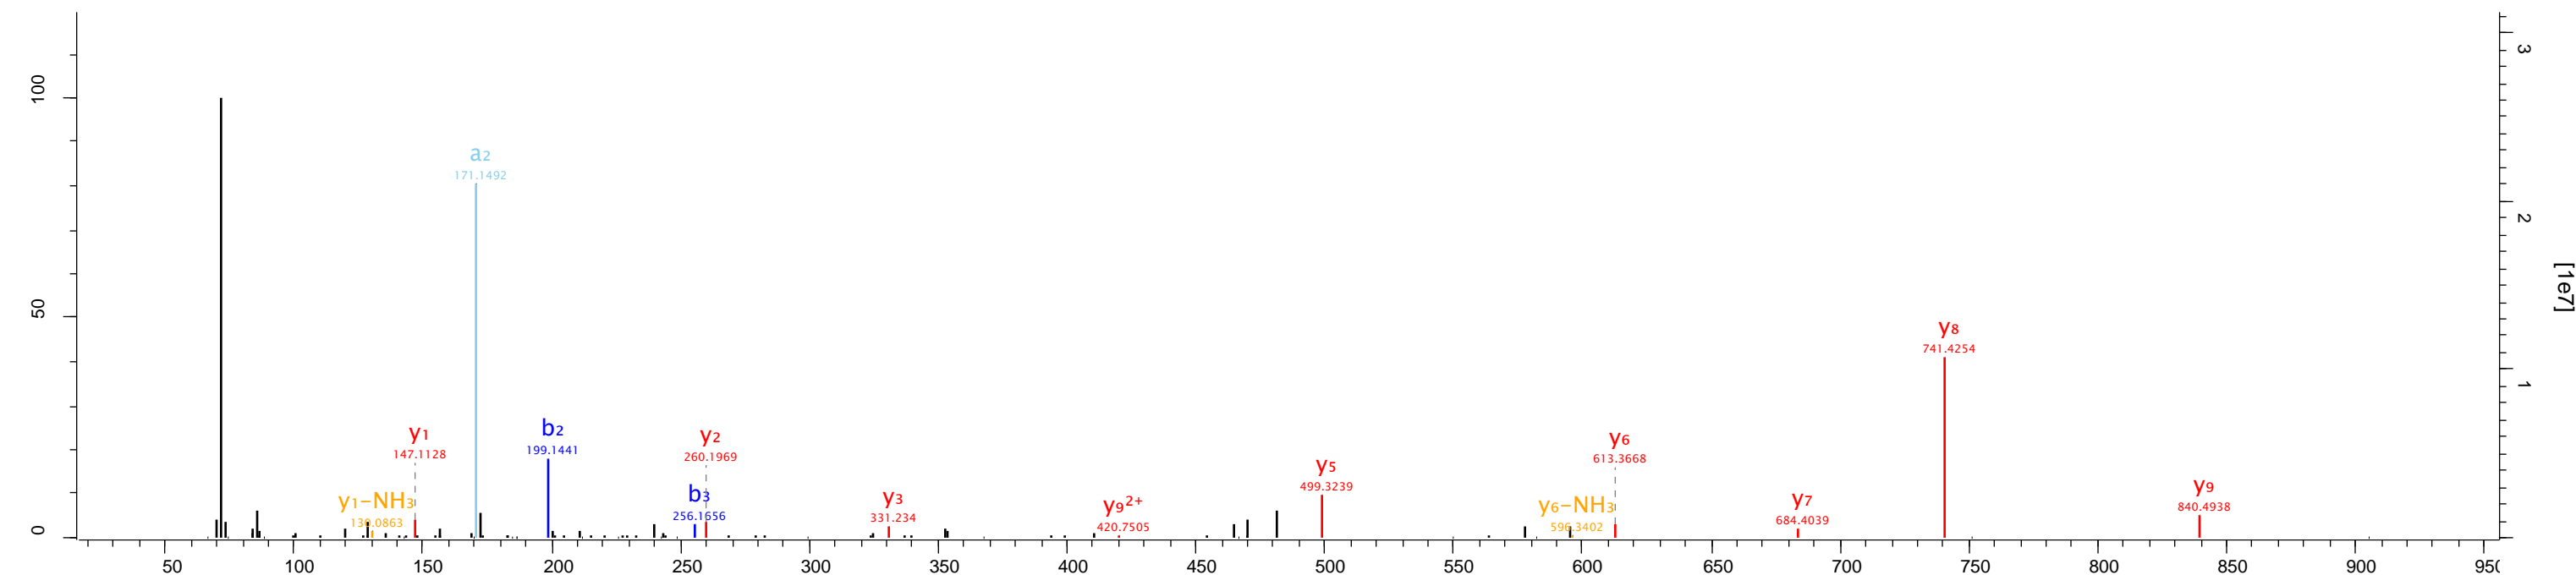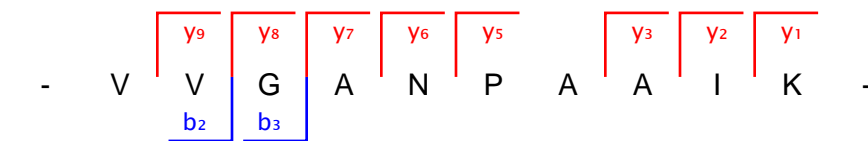

Raw file 20140827\_EXQ00\_FaHo\_SA\_SPP1\_03 Scan 5158 Method FTMS; HCD Score 98.25 m/z 761.38 Gene names RDL1

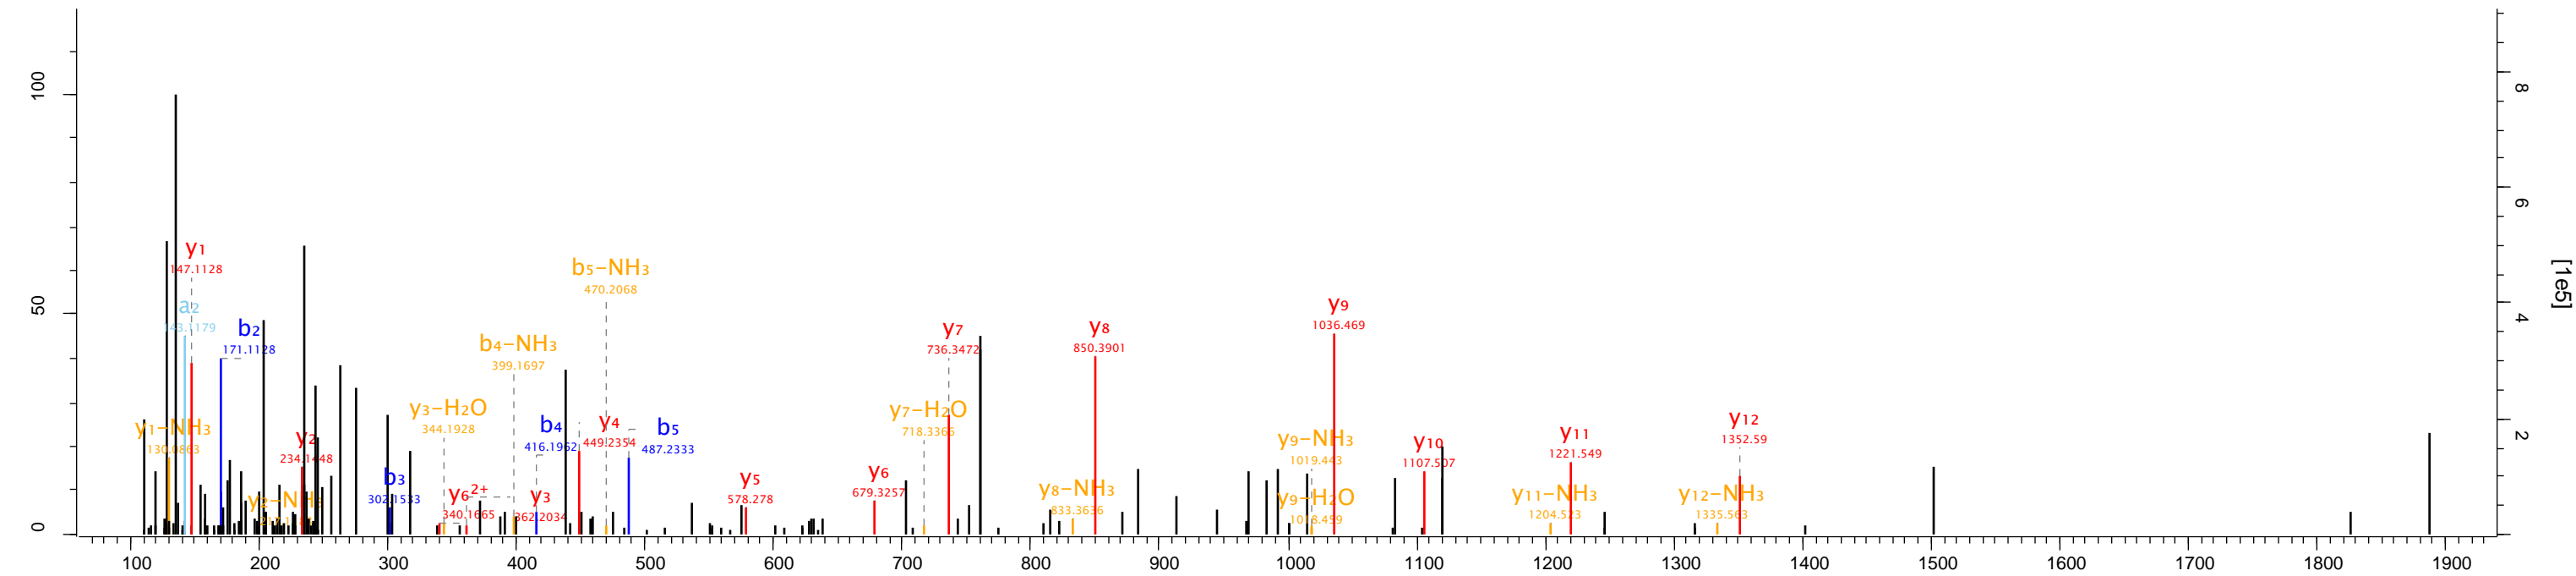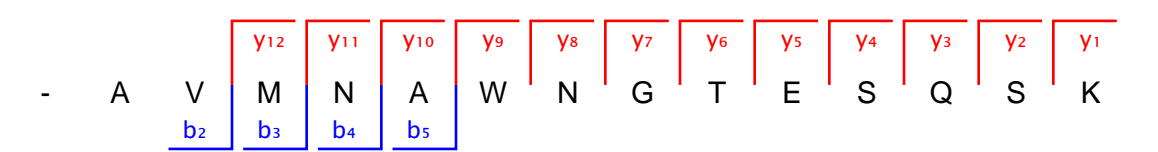

Raw file 20140827\_EXQ00\_FaHo\_SA\_SPP1\_03 Scan 5802 Method FTMS; HCD Score 120.84 m/z 703.34 Gene names NHP6B

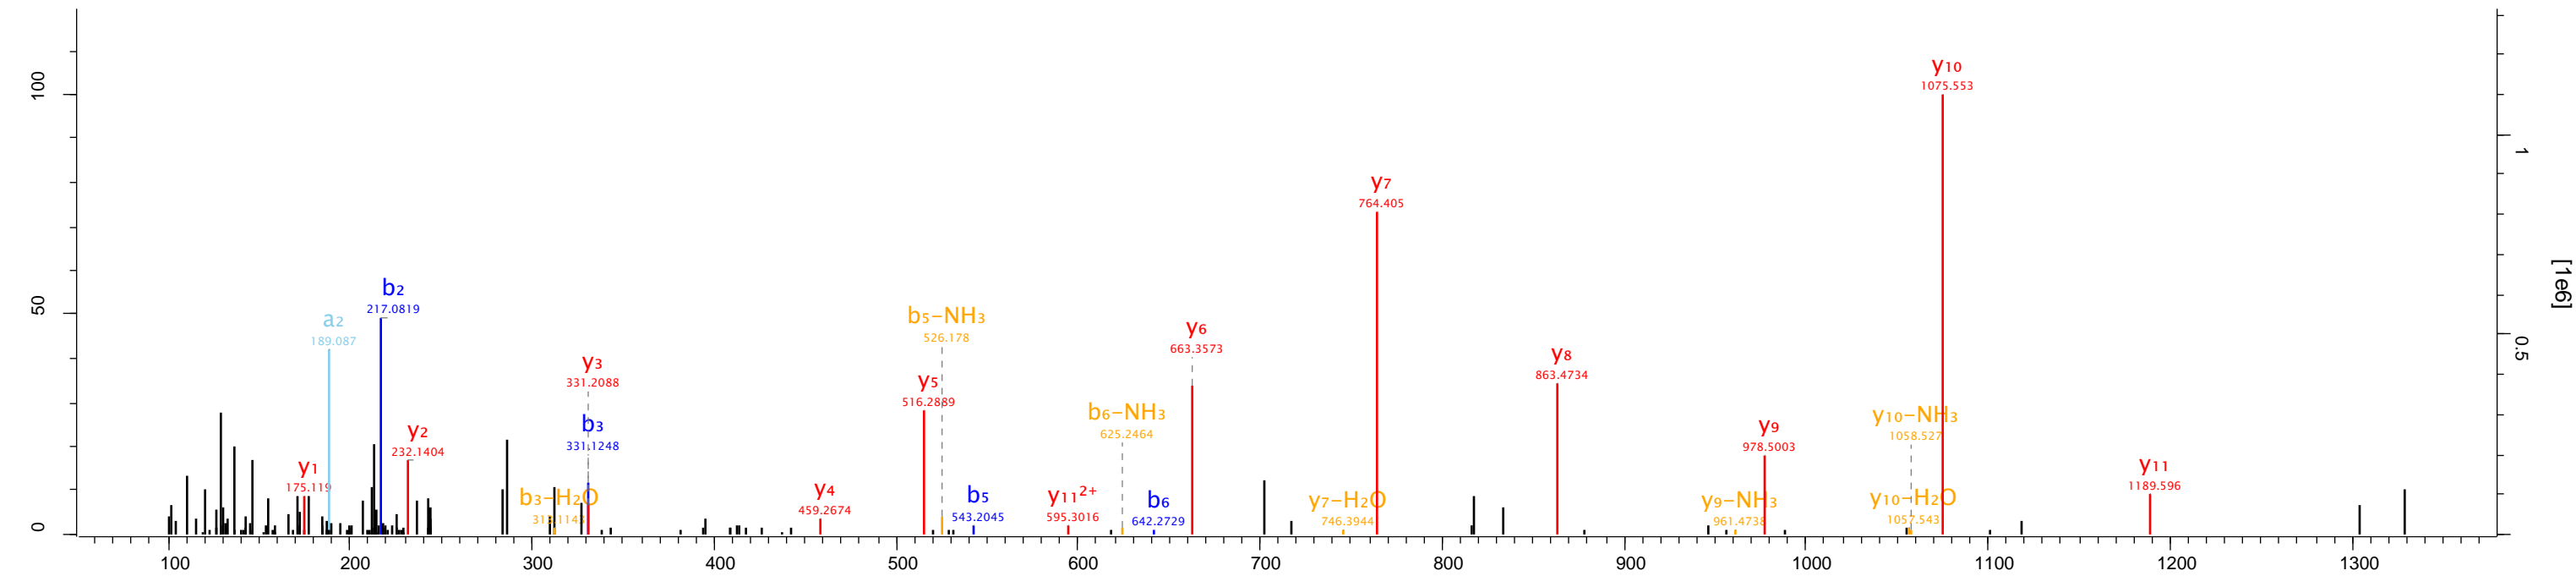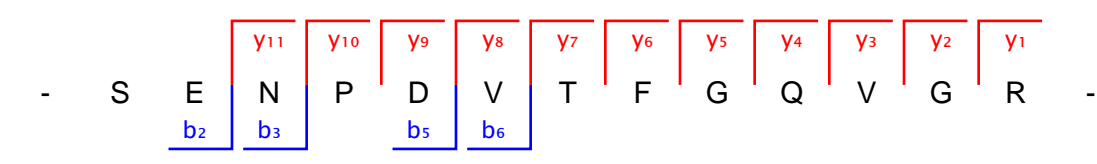



Raw file: 20140827\_EXQ00\_FaHo\_SA\_SPP1\_03  
 Scan: 7170 Method: FTMS; HCD Score: 72.32 m/z: 840.41 Gene names: ARP2

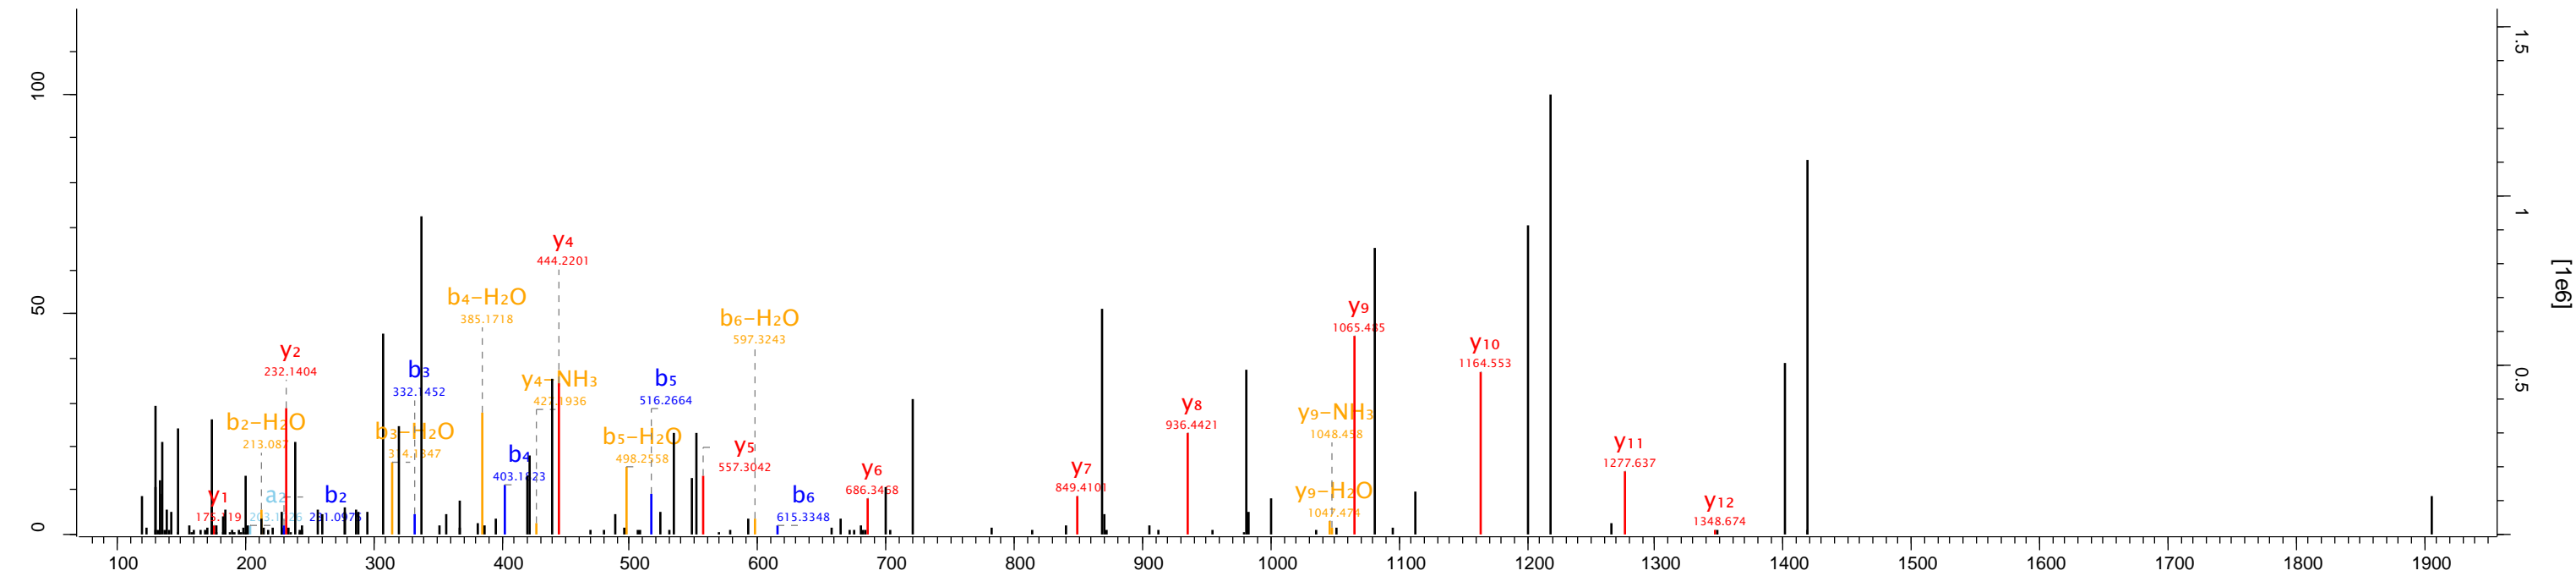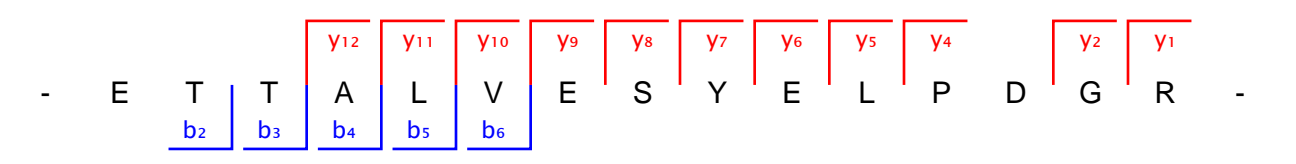

Raw file: 20140827\_EXQ00\_FaHo\_SA\_SPP1\_03  
 Scan: 8286 Method: FTMS; HCD Score: 60.66 m/z: 1036.93 Gene names: RPL22A

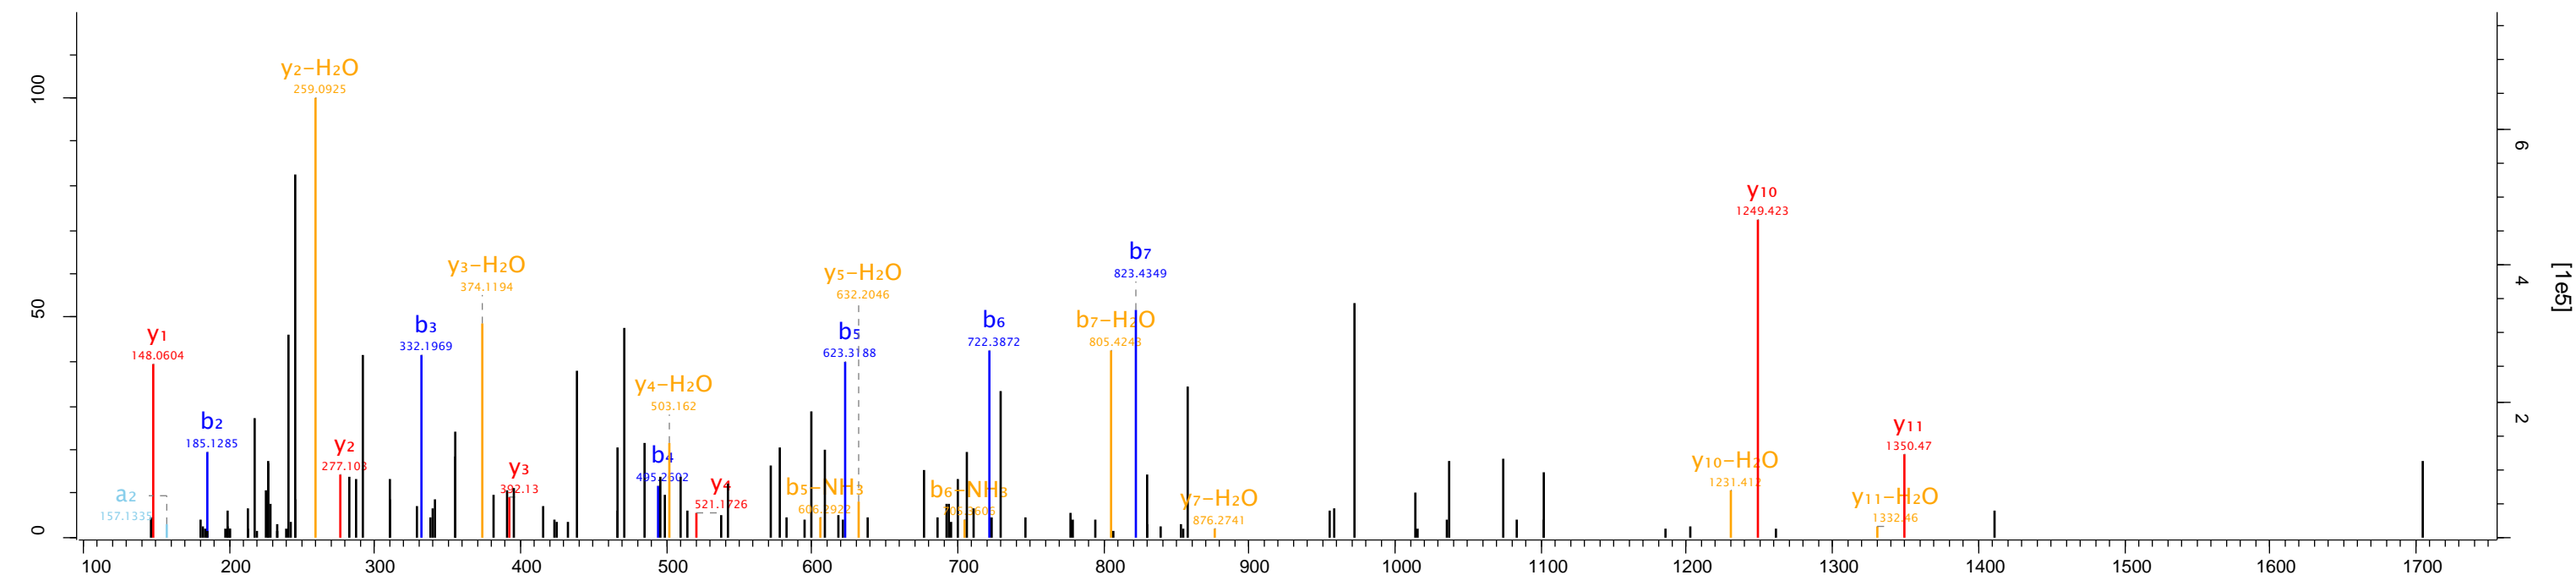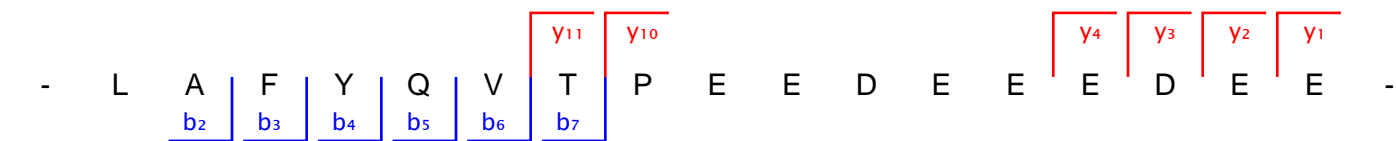

Raw file 20140827\_EXQ00\_FaHo\_SA\_SPP1\_03 Scan 8342 Method FTMS; HCD Score 180.11 m/z 789.89 Gene names ARF2

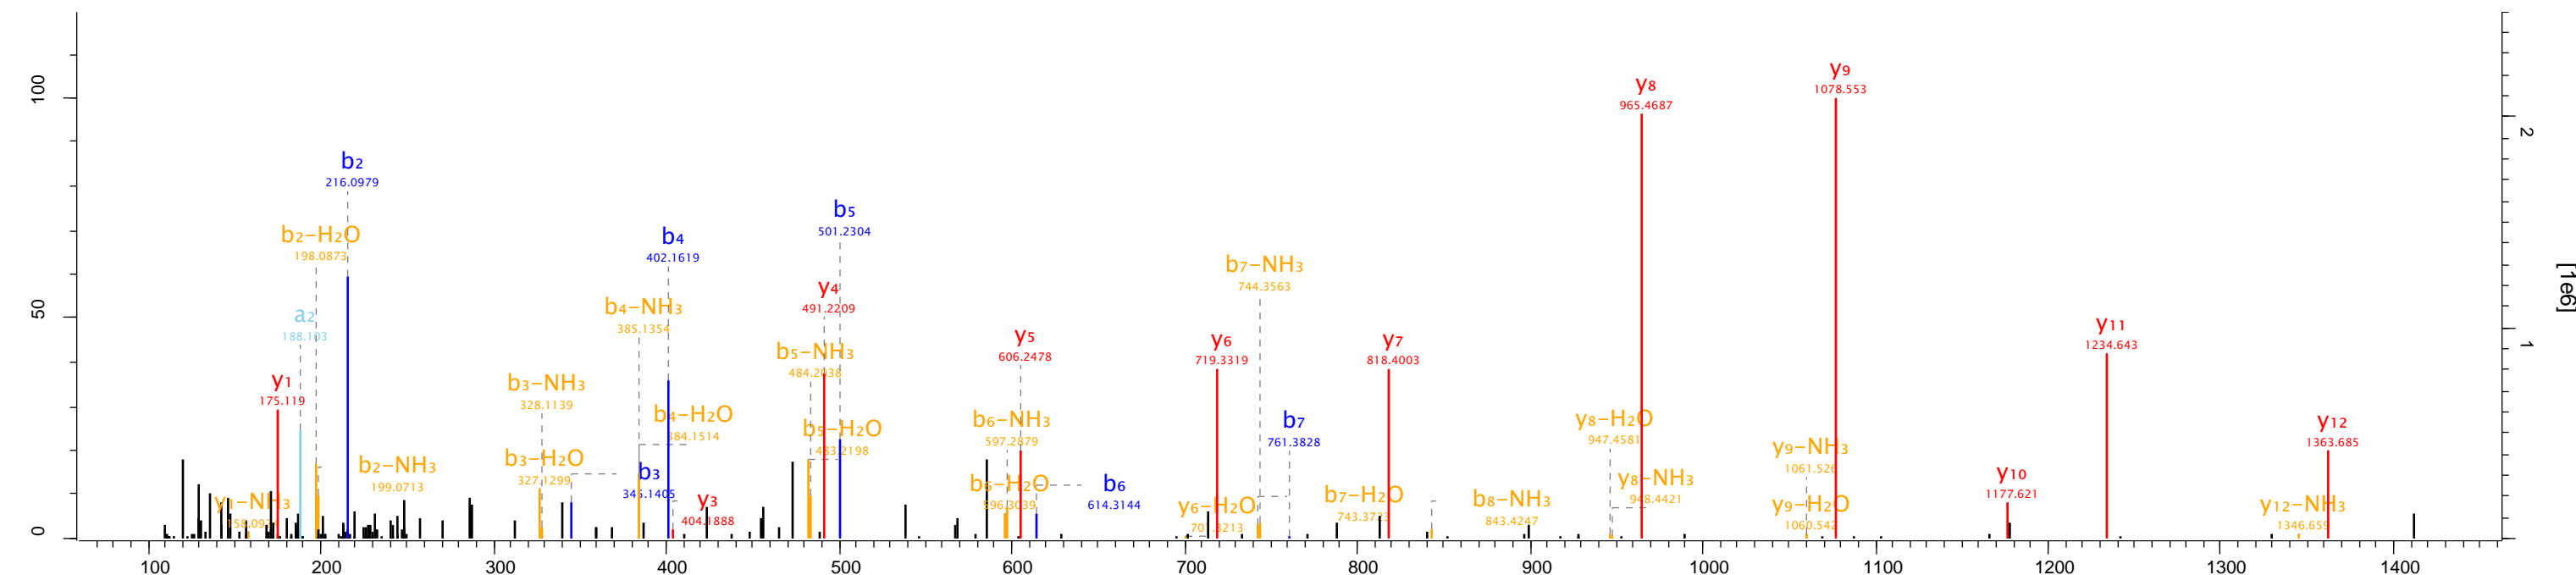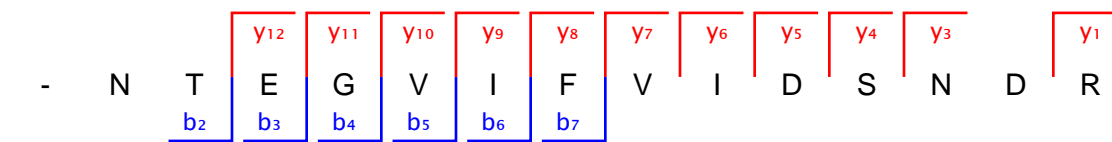

Raw file 20140827\_EXQ00\_FaHo\_SA\_SPT7\_01 Scan 4380 Method FTMS; HCD Score 146.36 m/z 530.6 Gene names PDR5;PDR15;PDR10

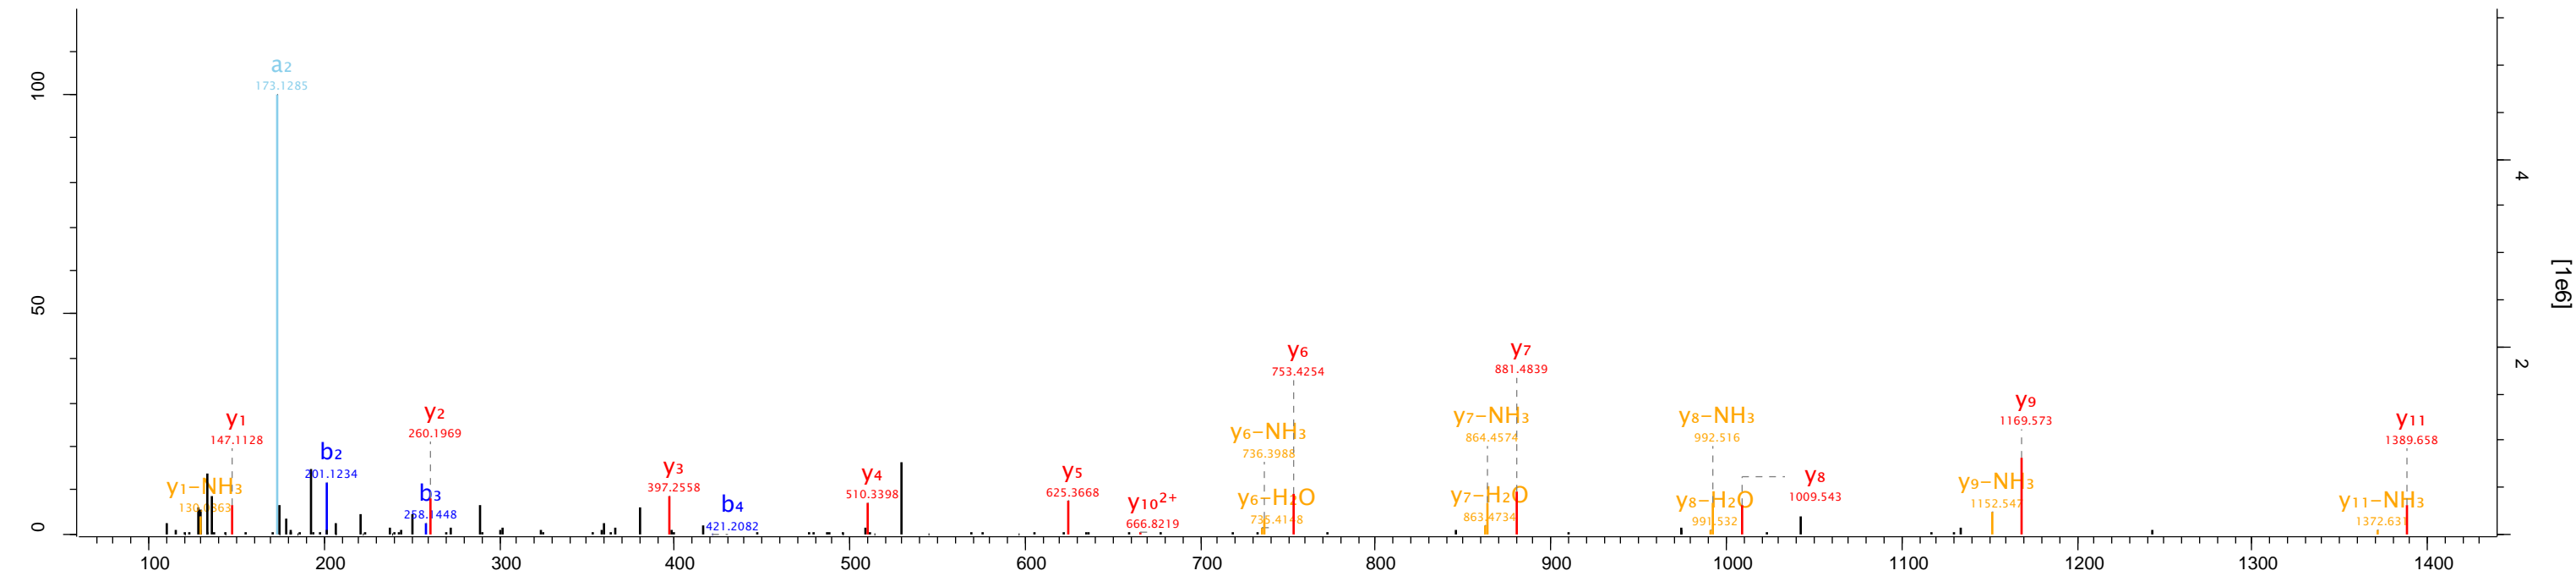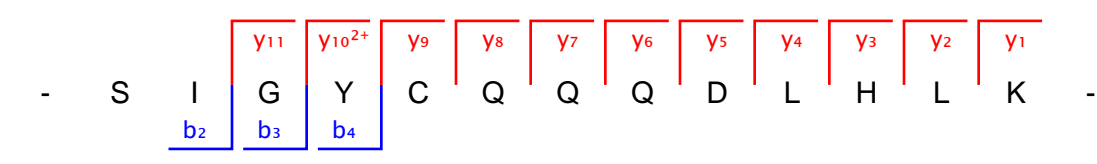

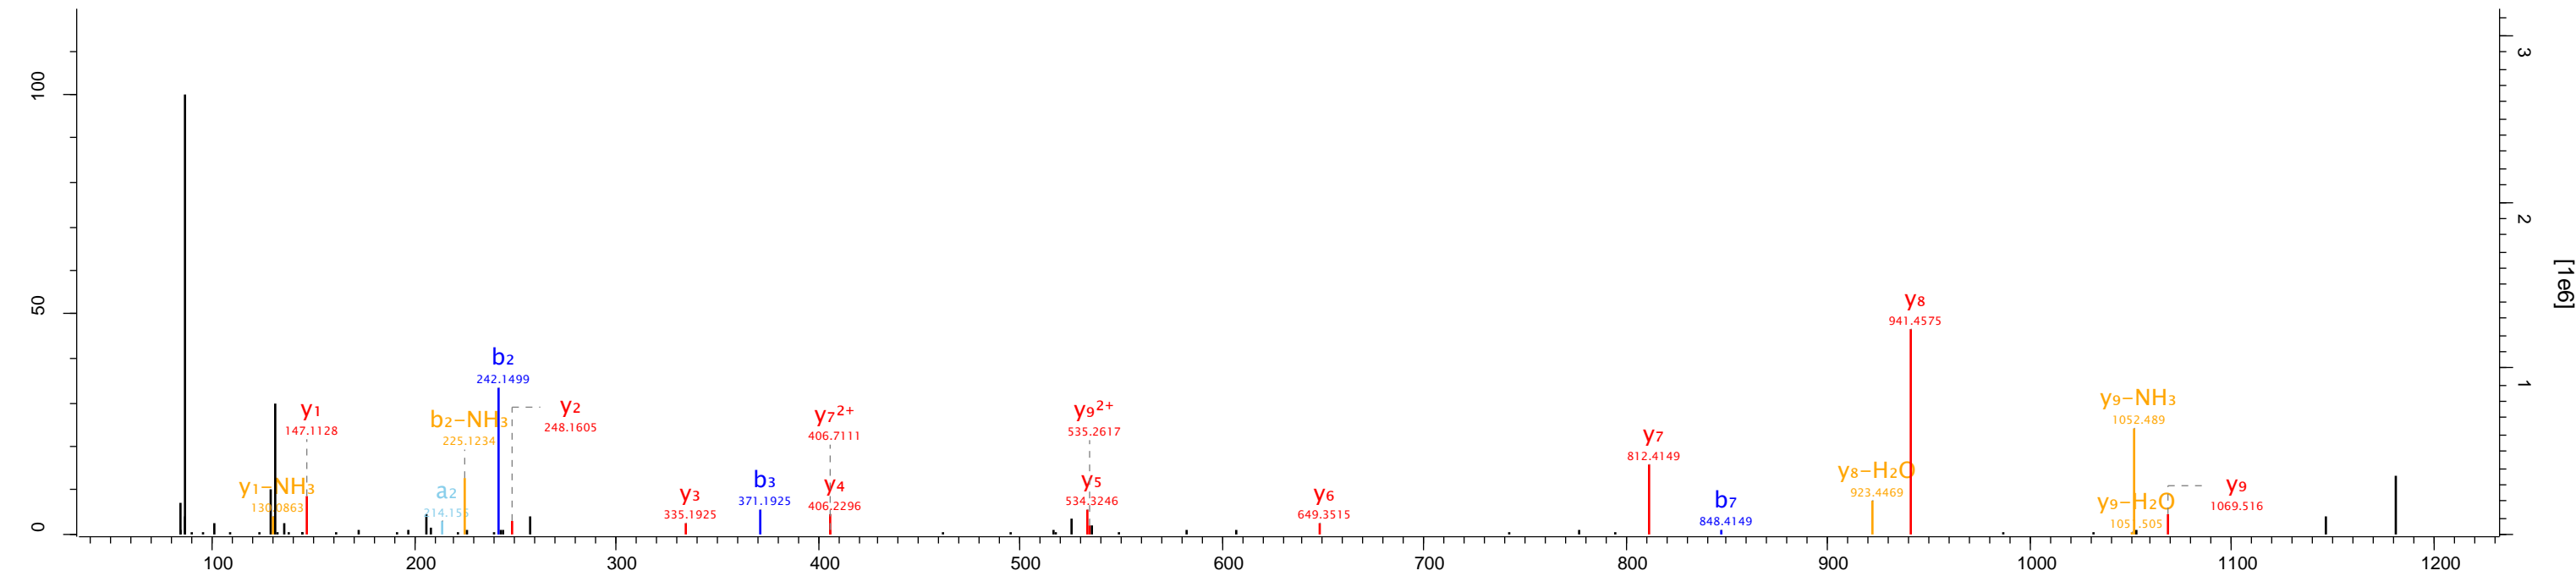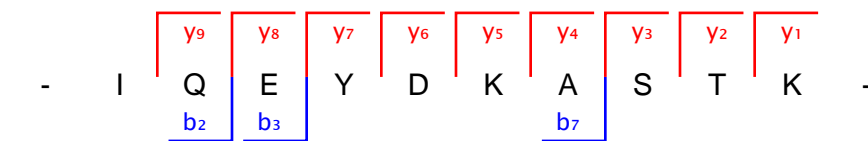

Raw file 20140827\_EXQ00\_FaHo\_SA\_SPT7\_02 Scan 3250 Method FTMS; HCD Score 90.15 m/z 584.29 Gene names FMP10

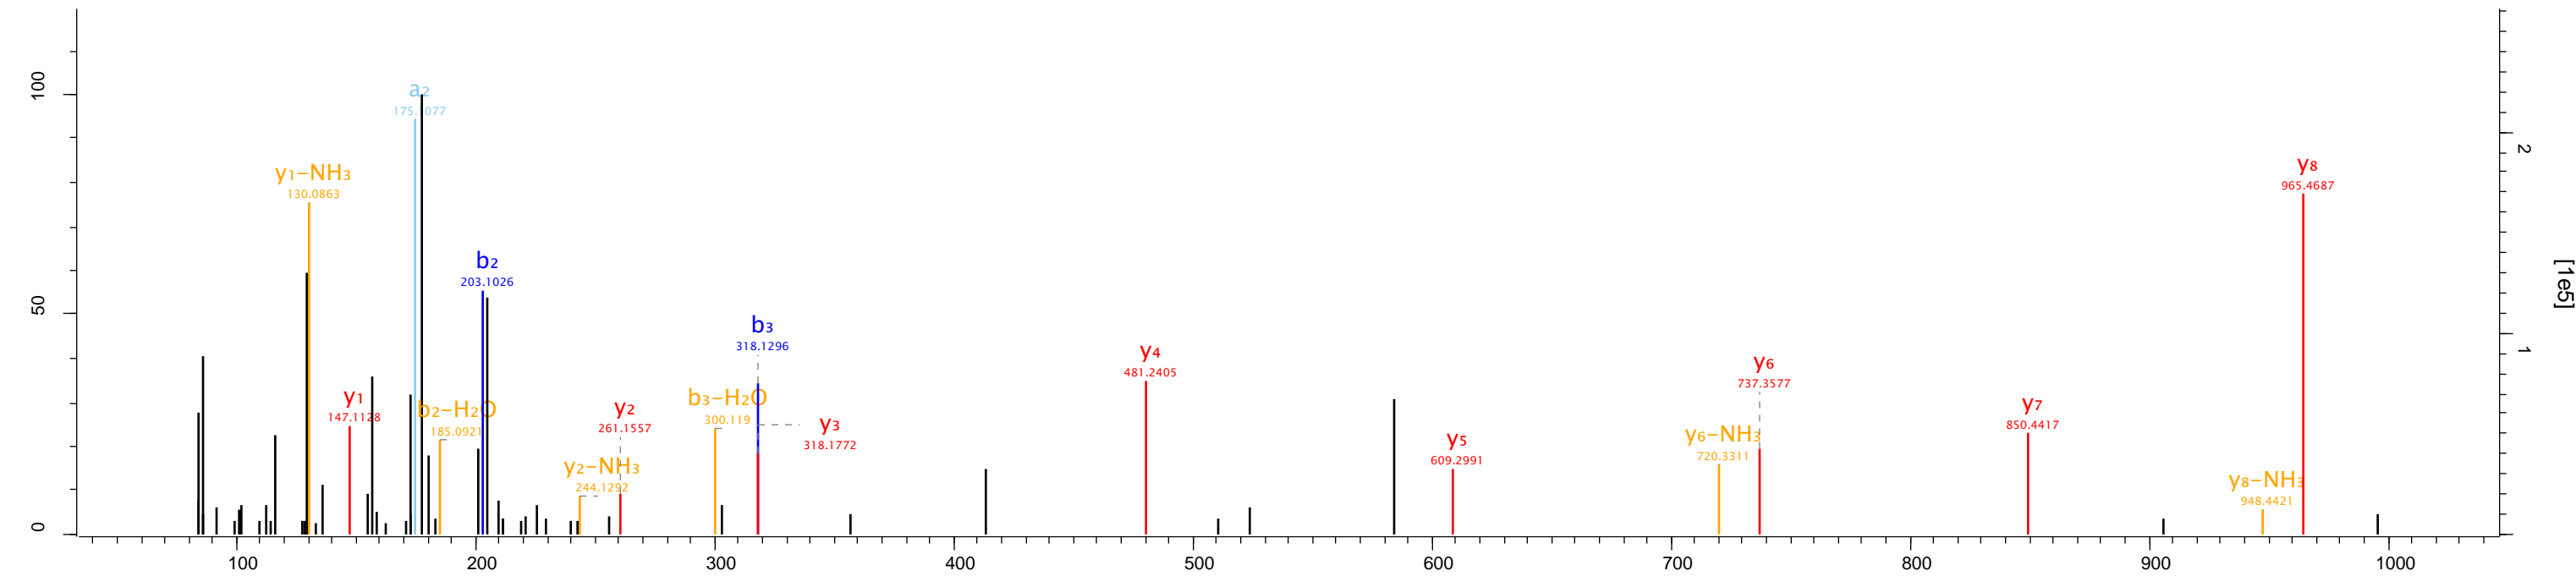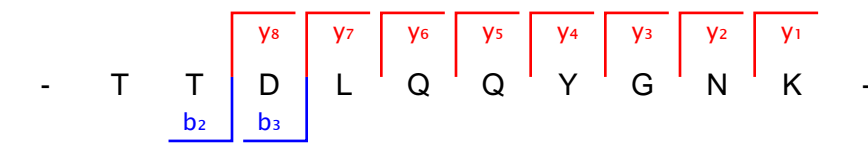

Raw file 20140827\_EXQ00\_FaHo\_SA\_SPT7\_02 Scan 3647 Method FTMS; HCD Score 81.3 m/z 403.71 Gene names PDR12;PDR10;SNQ2

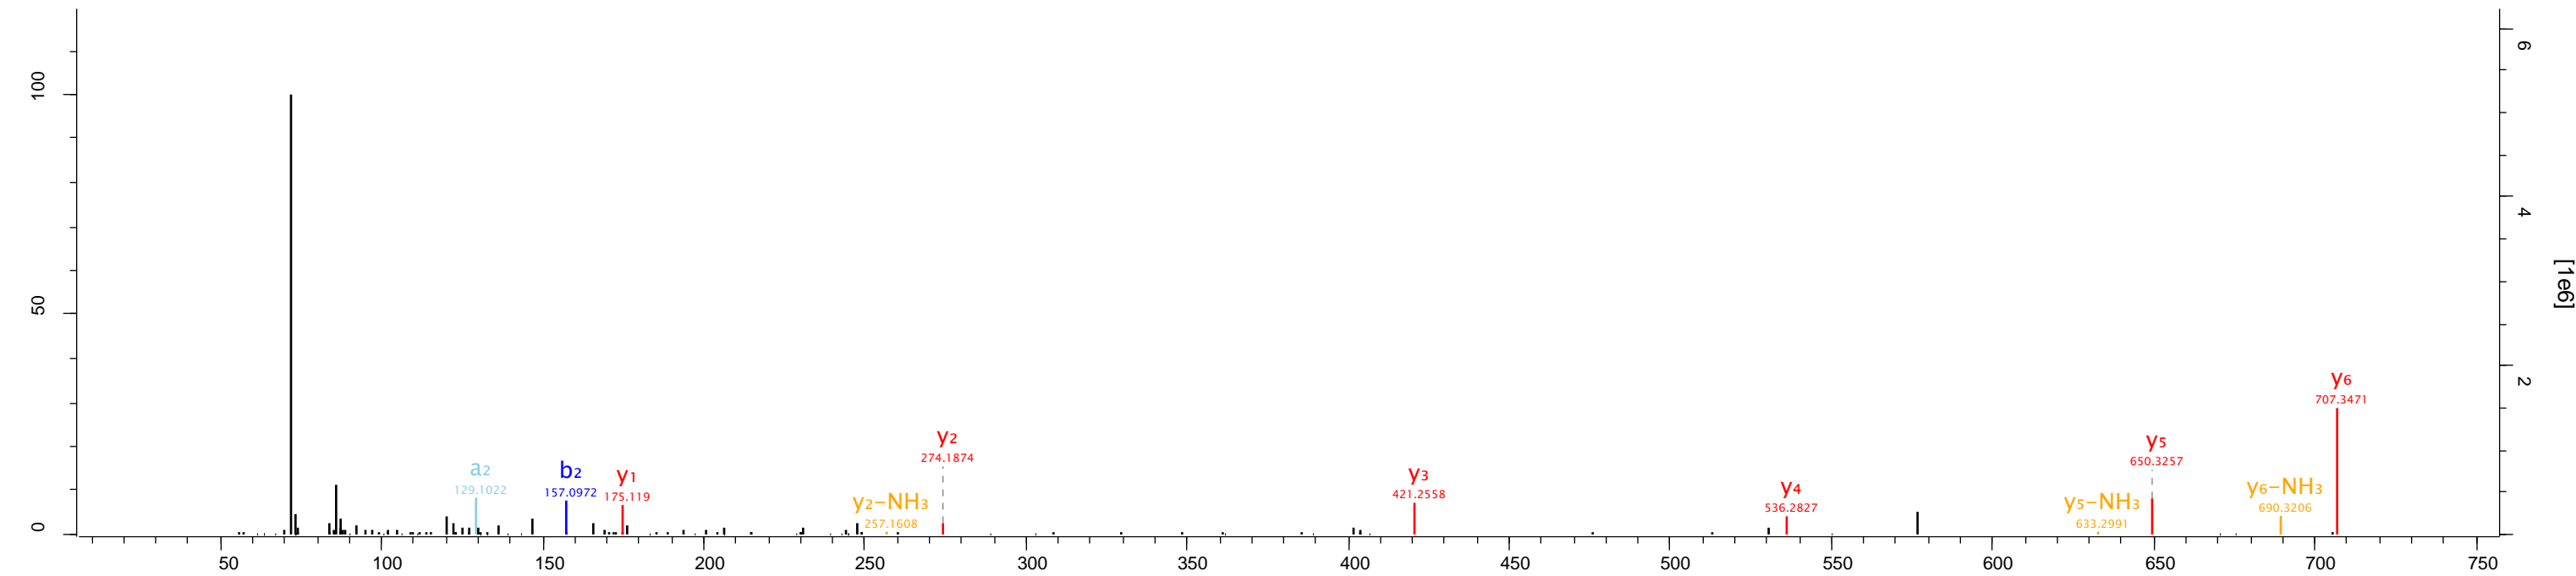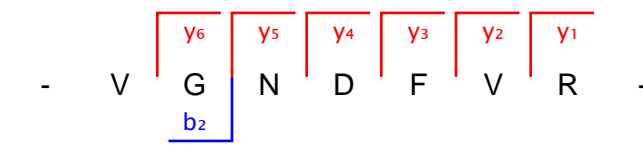

Raw file: 20140827\_EXQ00\_FaHo\_SA\_SPT7\_02  
 Scan: 6517 Method: FTMS; HCD Score: 90.71 m/z: 748.9 Gene names: TPO4

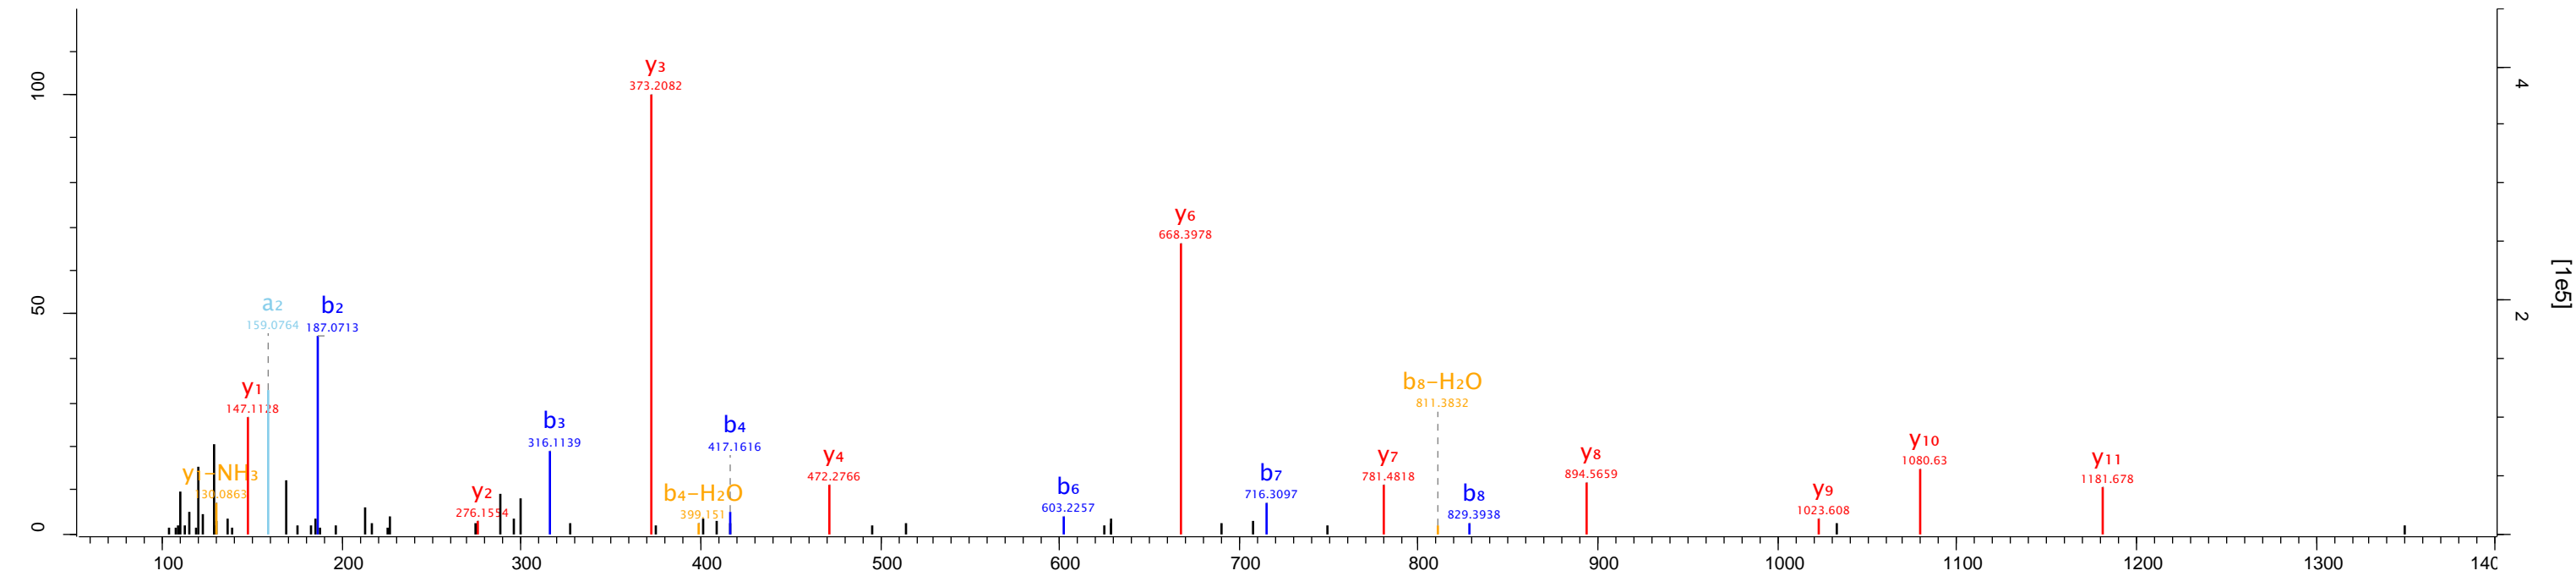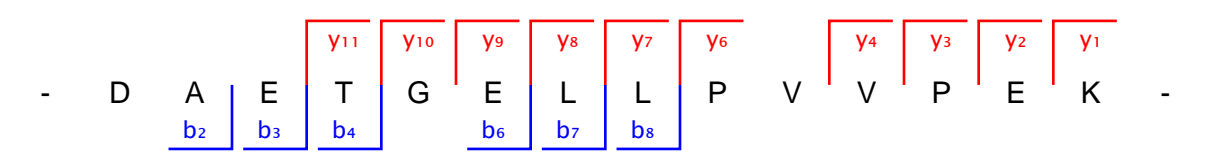



Raw file 20140827\_EXQ00\_FaHo\_SA\_STH1\_01 Scan 4465 Method FTMS; HCD Score 169.12 m/z 480.76 Gene names RPL9A;RPL9B

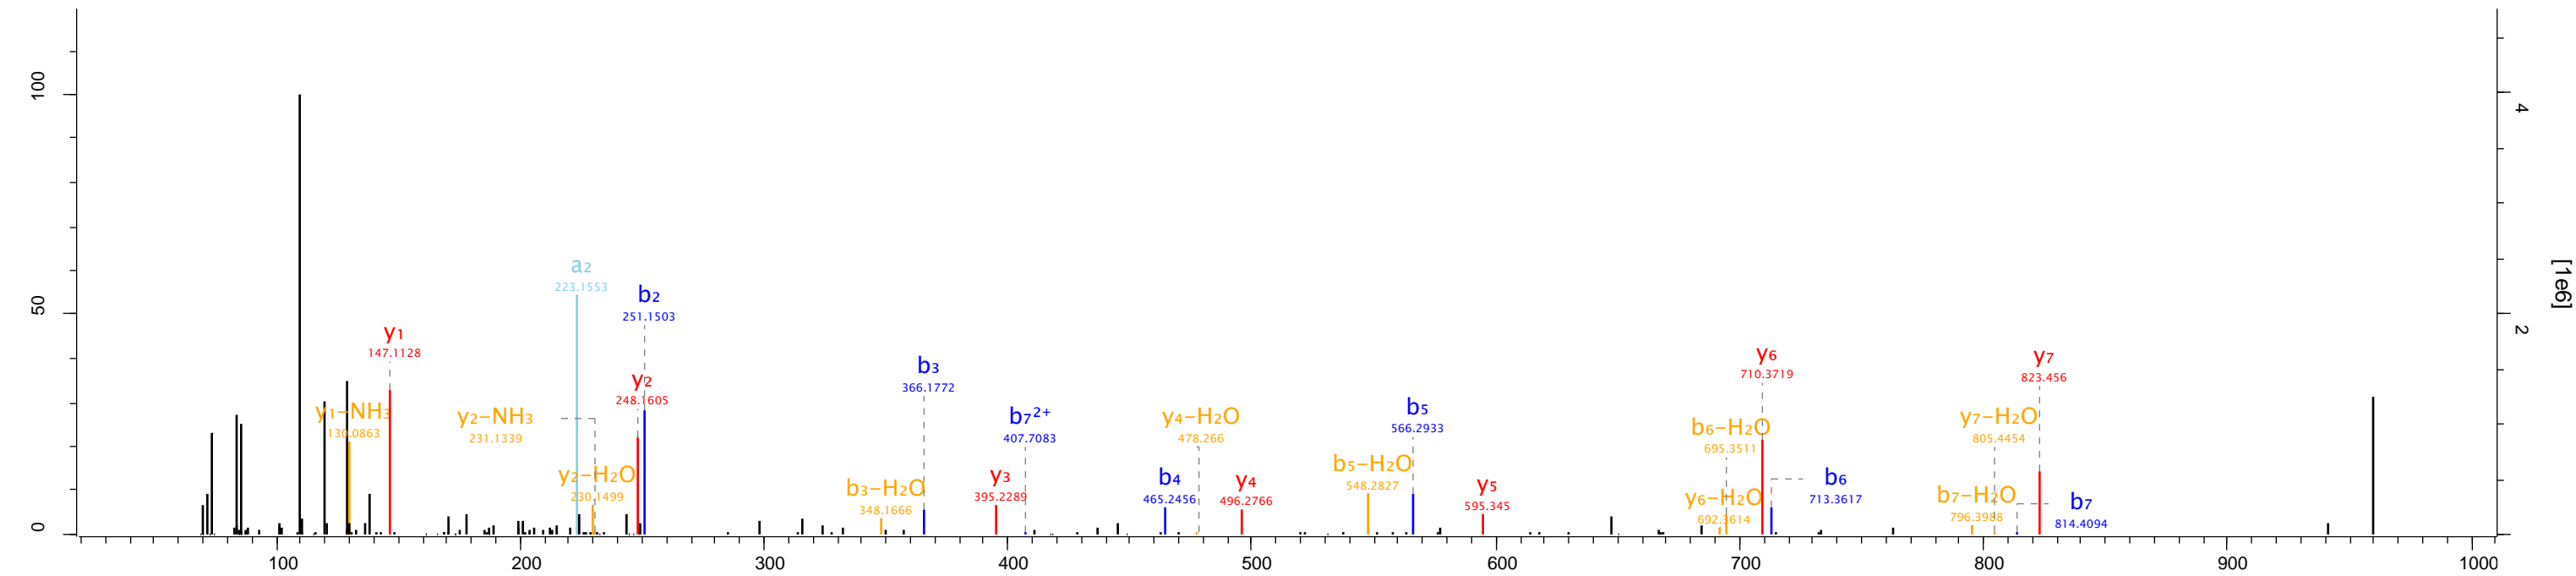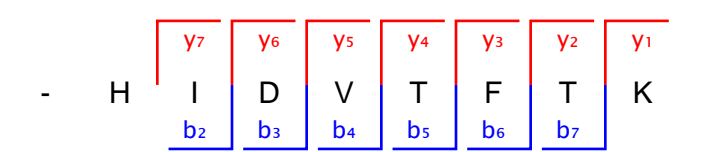

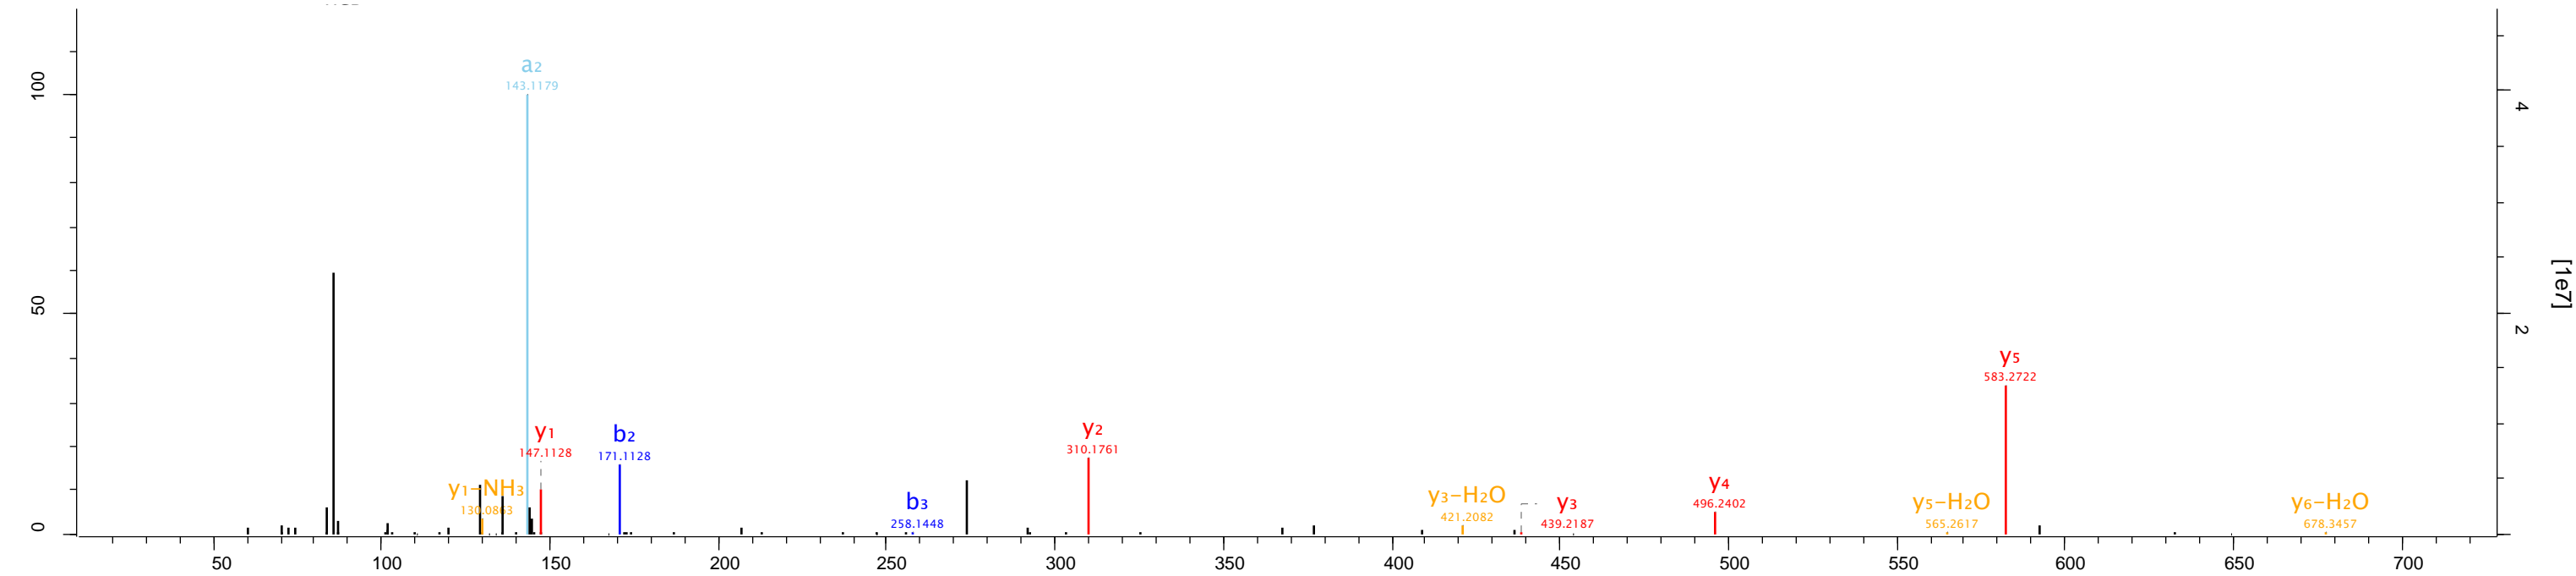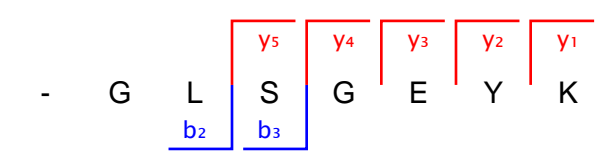

Raw file

20140827\_EXQ00\_FaHo\_SA\_STH1\_03

| Scan | Method    | Score | m/z    | Gene names                                                                                            |
|------|-----------|-------|--------|-------------------------------------------------------------------------------------------------------|
| 2099 | FTMS; HCD | 48.95 | 439.88 | TY1A-PR1;TY1A-A;TY1A-DR4;TY1B-H;TY1B-GR2;TY1B-MR2;TY1B-ER2;TY1B-OR;TY1B-BR;TY1B-DR1;TY1B-NL2;TY1B-LR1 |

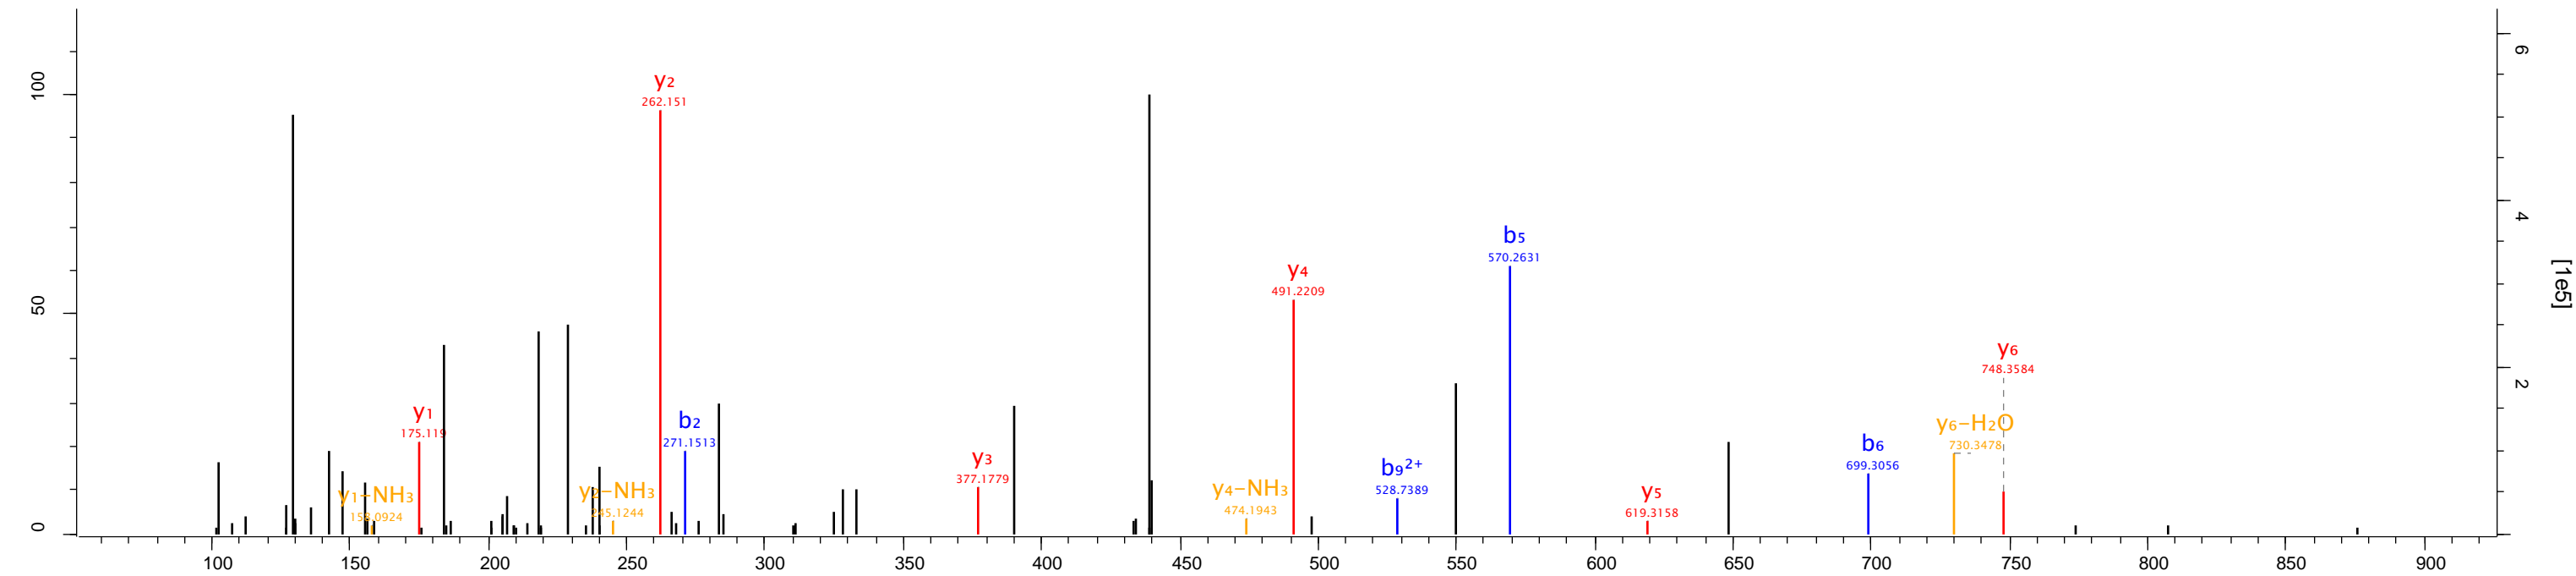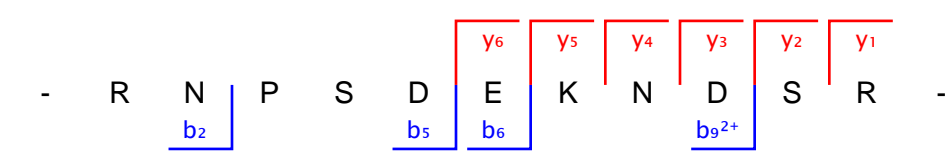

Raw file 20140827\_EXQ00\_FaHo\_SA\_STH1\_03 Scan 6449 Method FTMS; HCD Score 153.32 m/z 731.37 Gene names RPL17A;RPL17B

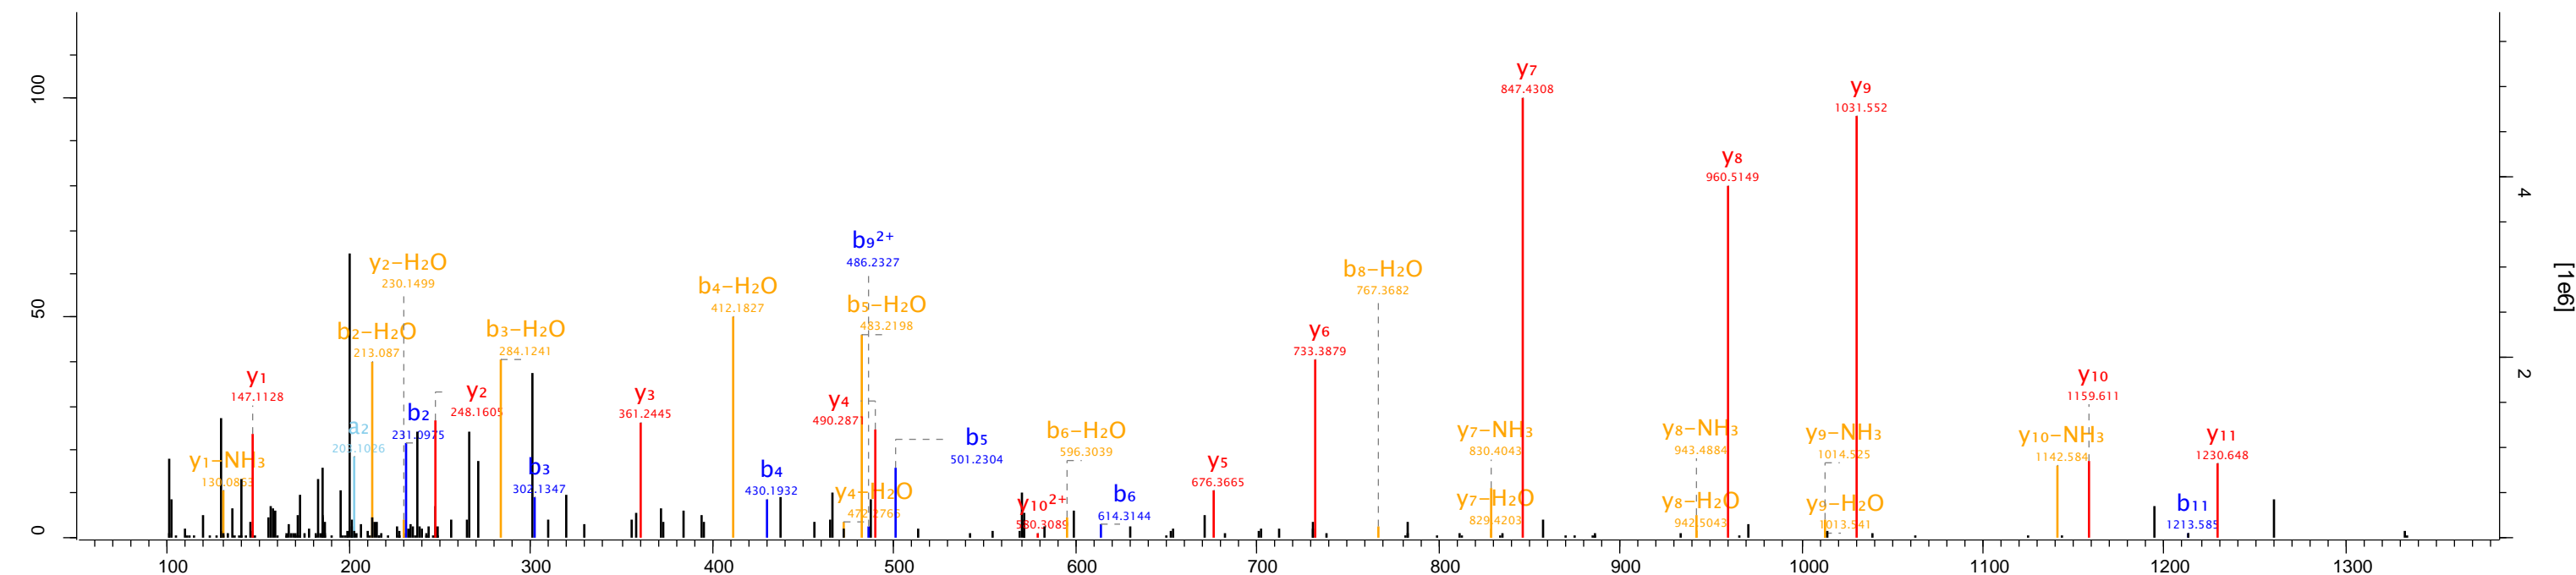

- E T A Q A I N G W E L T K -

Fragmentation mapping (b and y ions) is shown below the sequence:

- b2: T
- b3: A
- b4: Q
- b5: A
- b6: I
- b9^2+: W
- b11: L
- y1: K
- y2: T
- y3: L
- y4: E
- y5: W
- y6: G
- y7: N
- y8: I
- y9: A
- y10: Q
- y11: A

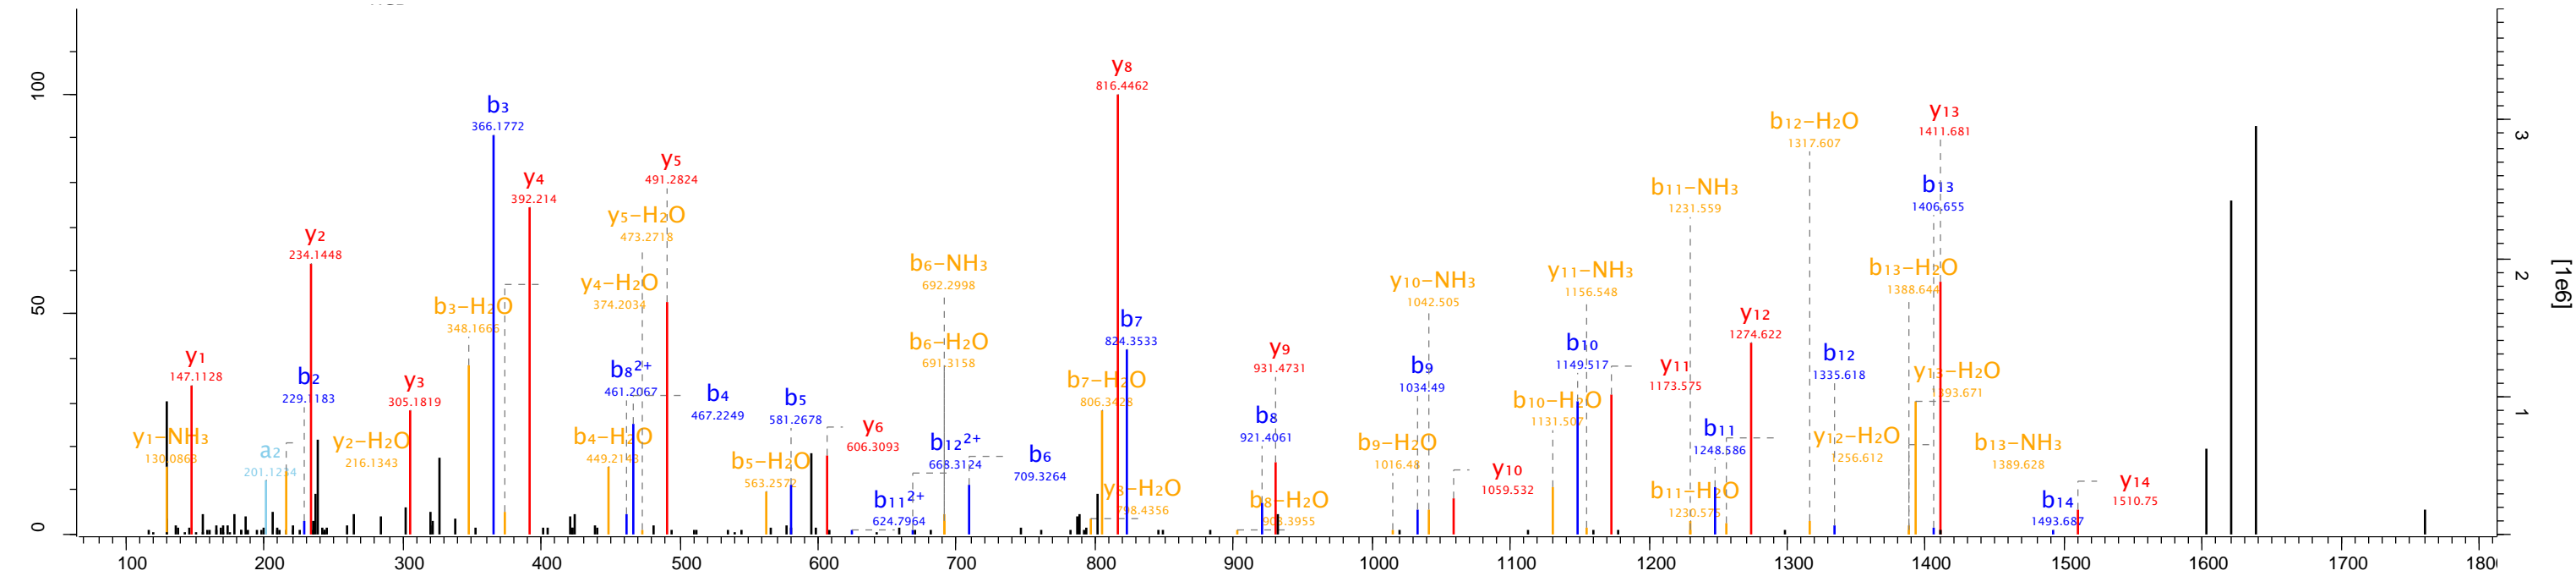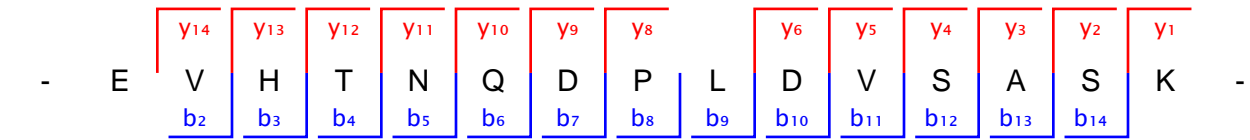

Raw file  
20140827\_EXQ00\_FaHo\_SA\_SW3\_02

Scan 4883 Method FTMS; HCD Score 204.7 m/z 867.4 Gene names TY1A-PL;TY1A-LR2;TY1A-ER1;TY1A-DR6;TY1B-LR2;TY1B-PL;TY1B-ER1;TY1A-PR1;TY1A-A;TY1A-DR4;TY1B-NL2;TY1B-NL1;TY1B-MR1;TY1A-DR2;TY1A-MR1

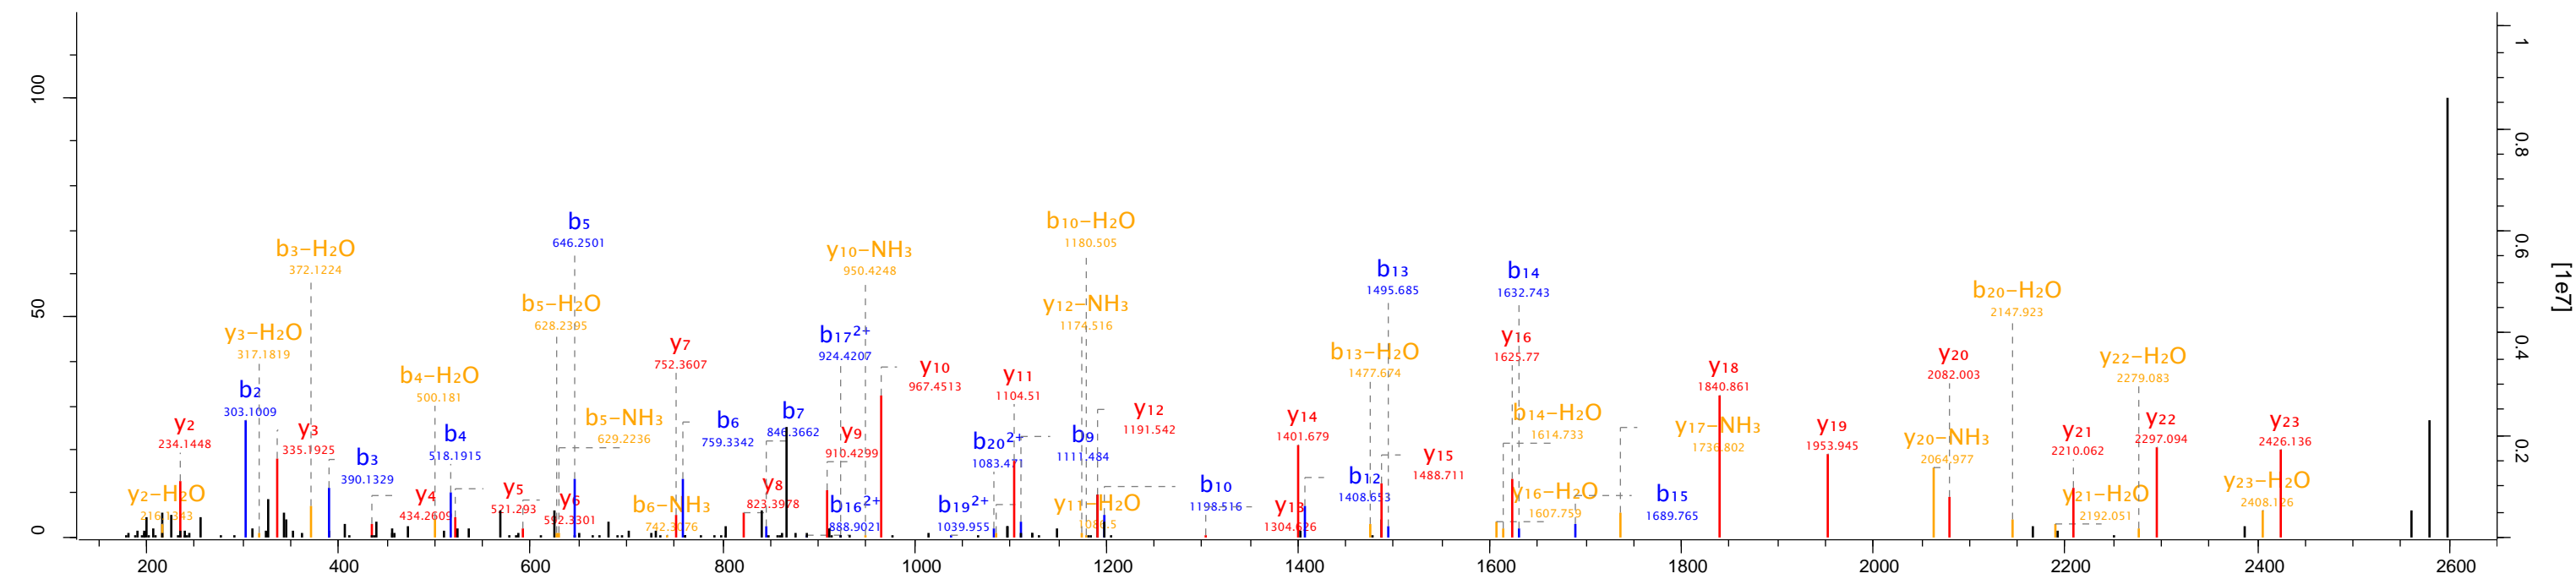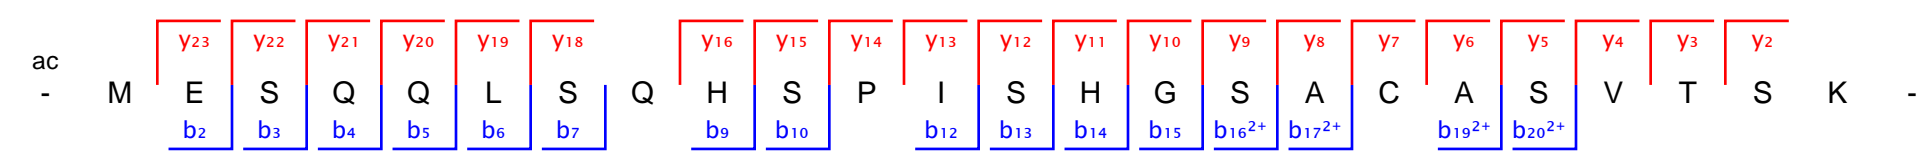

Raw file 20140827\_EXQ00\_FaHo\_SA\_SWD3\_03 Scan 3940 Method FTMS; HCD Score 141.65 m/z 670.87 Gene names RPS14B;RPS14A

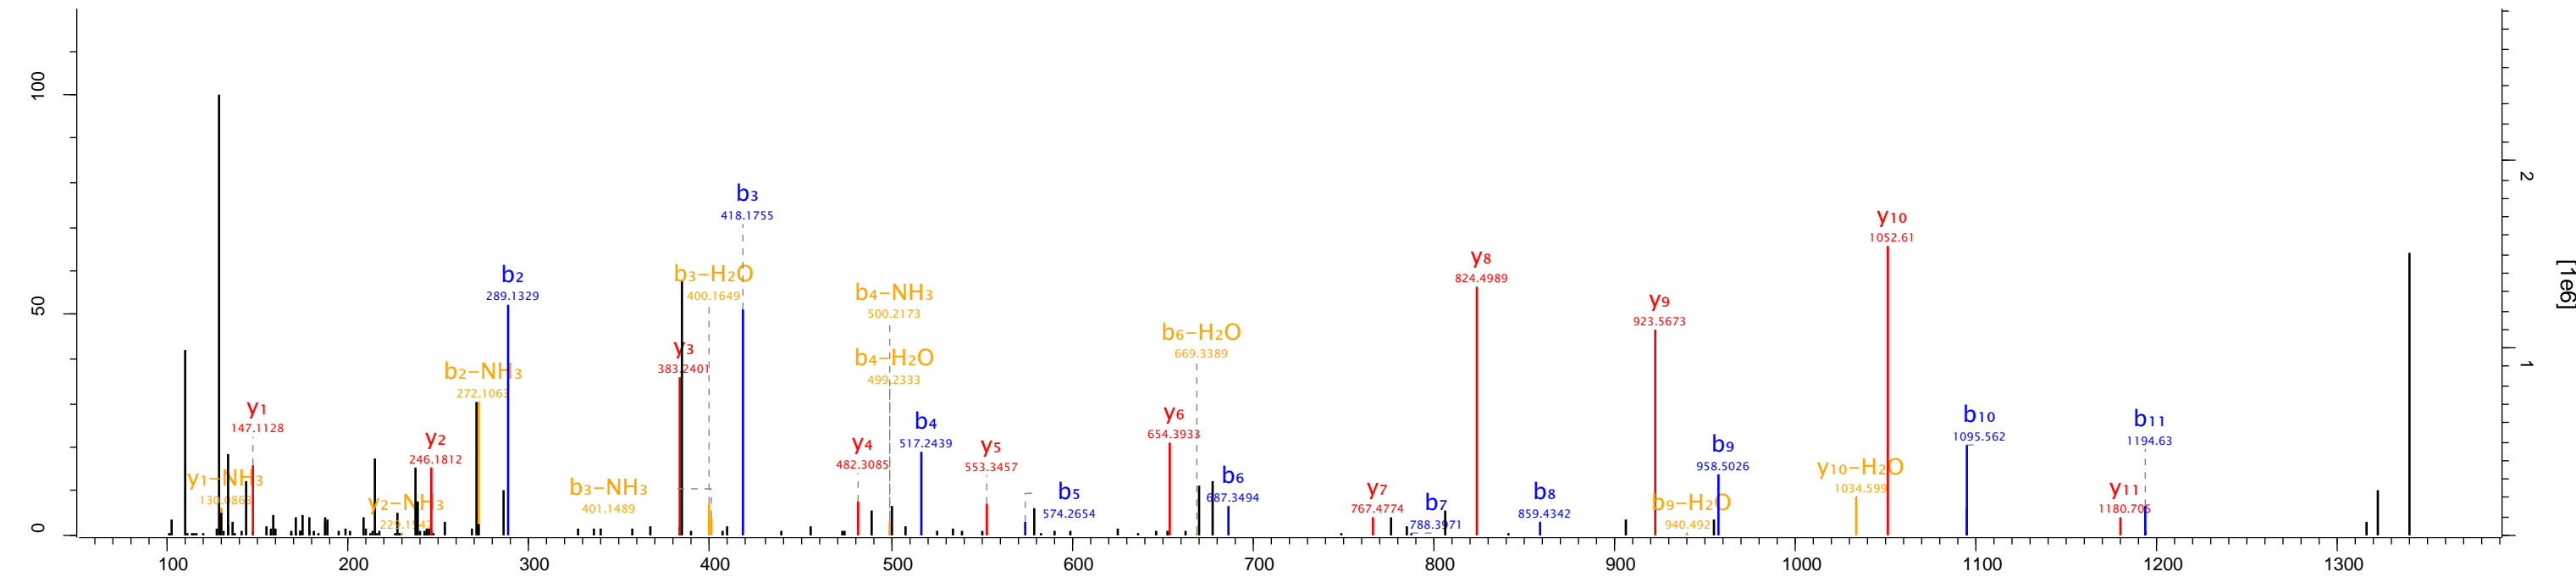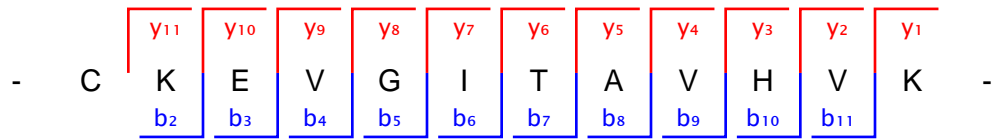

Raw file: 20140827\_EXQ00\_FaHo\_SA\_SWD3\_03  
 Scan: 6140 Method: FTMS; HCD Score: 125.74 m/z: 589.81 Gene names: RPL9A;RPL9B

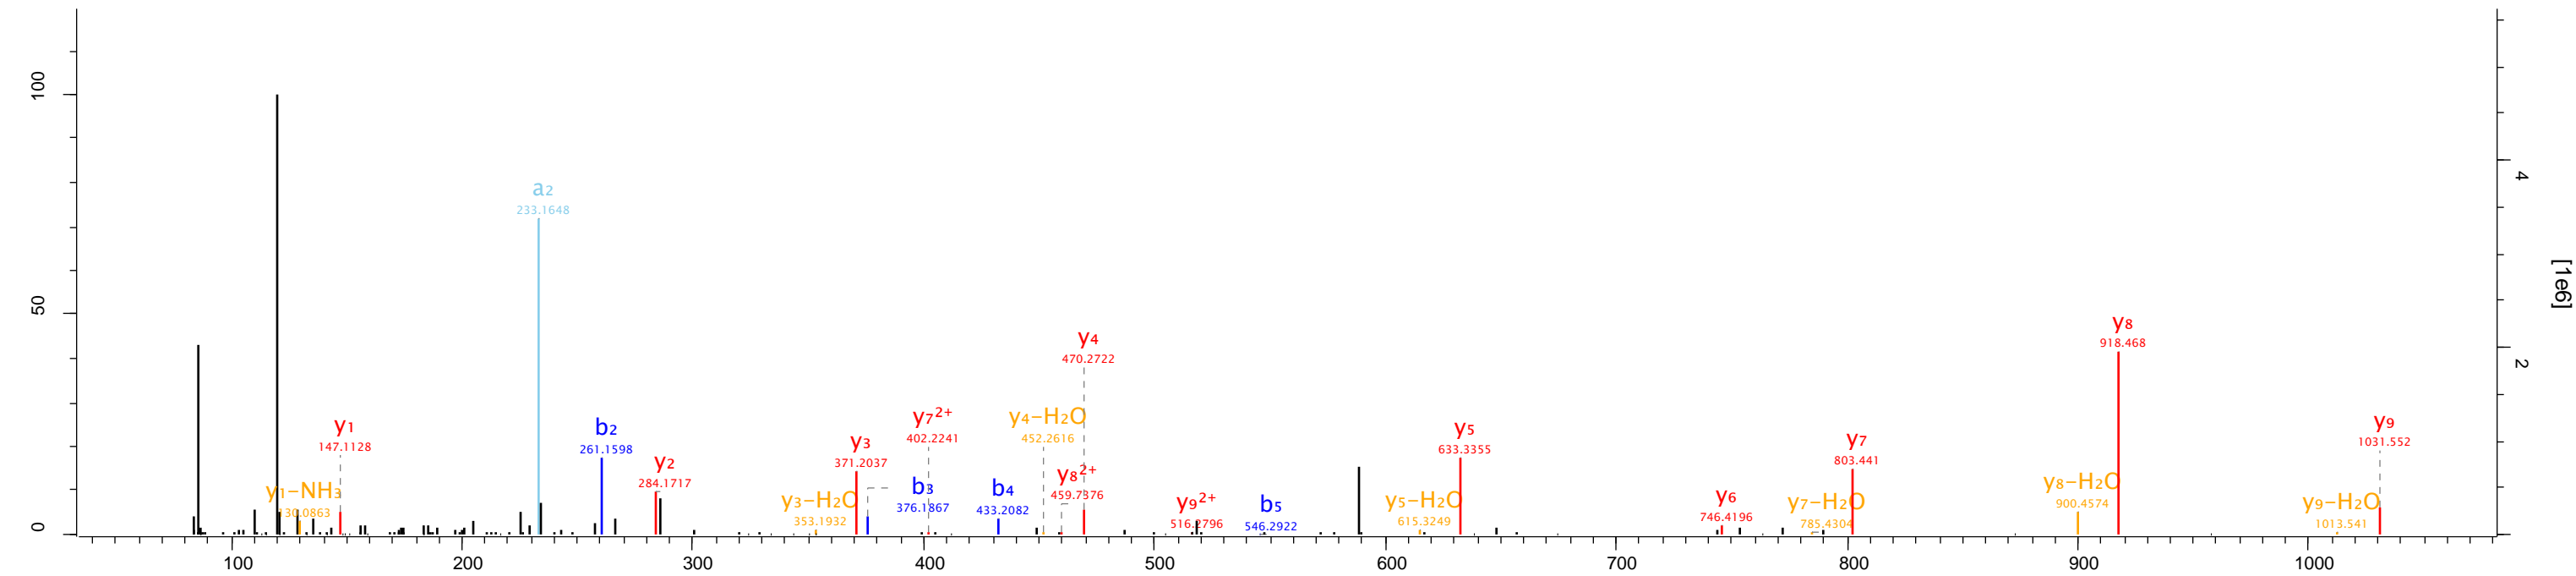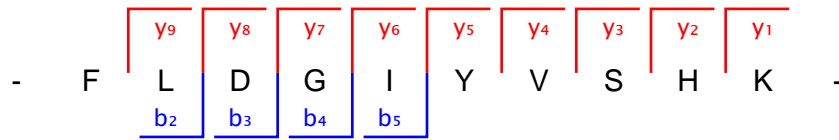



Raw file 20140827\_EXQ00\_FaHo\_SA\_SWI3\_01 Scan 3461 Method FTMS; HCD Score 98.23 m/z 448.23 Gene names RPL4B;RPL4A

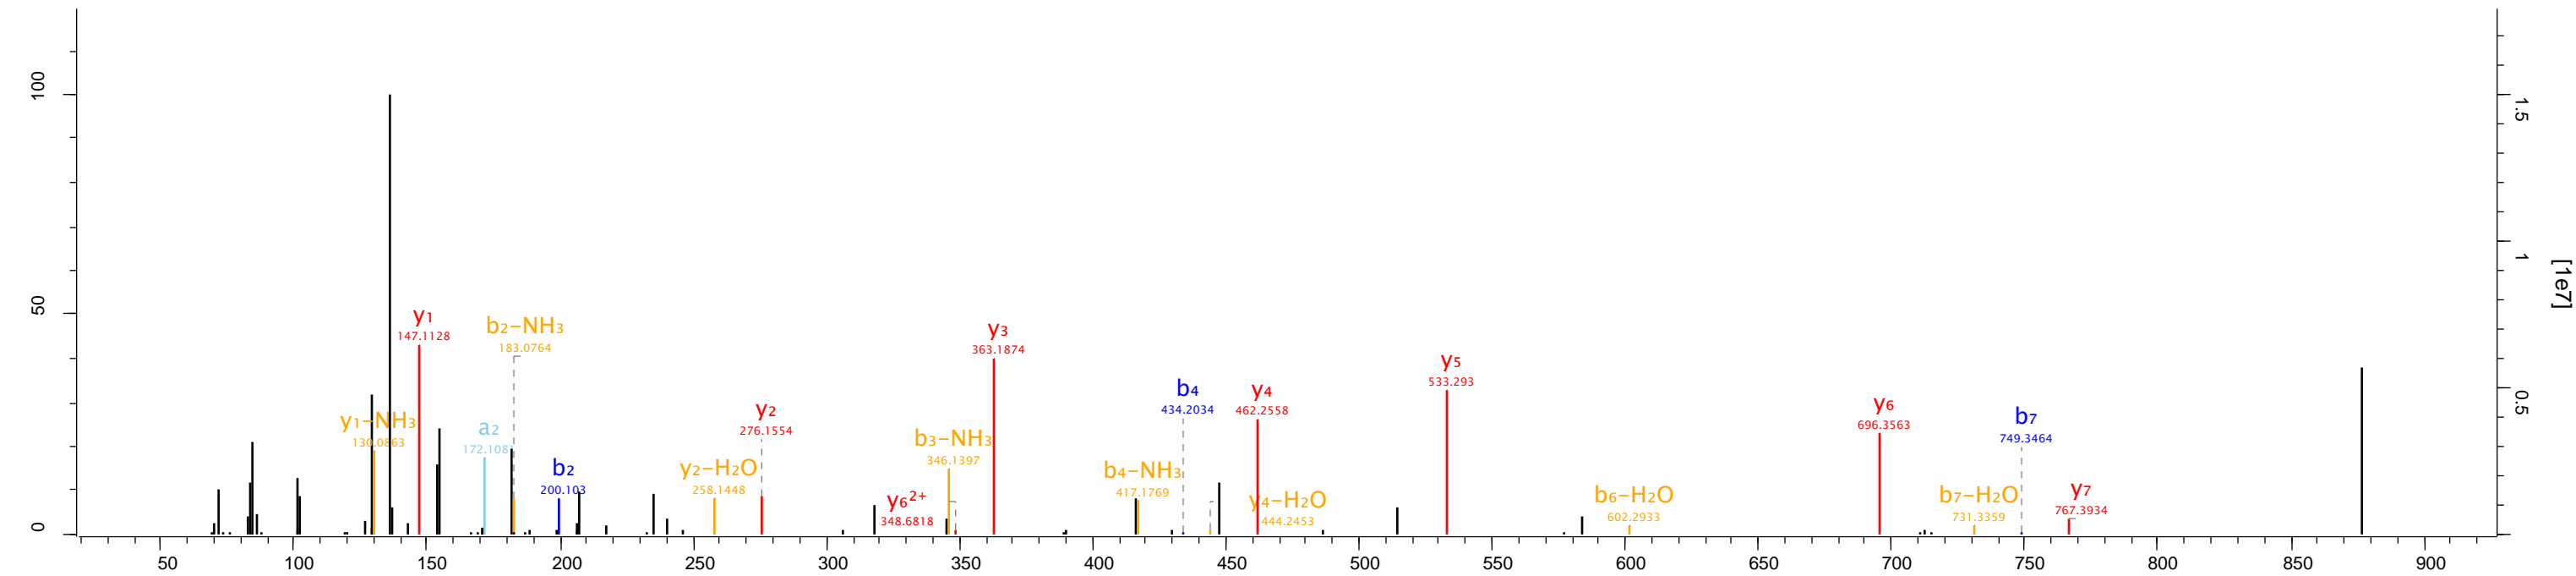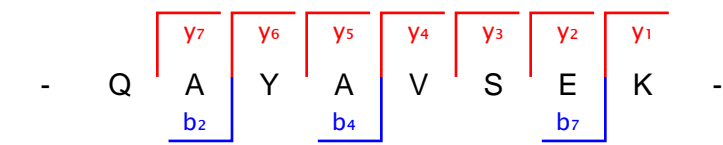

Raw file 20140827\_EXQ00\_FaHo\_SA\_SWI3\_01 Scan 3762 Method FTMS; HCD Score 77.28 m/z 411.23 Gene names RPL9A;RPL9B

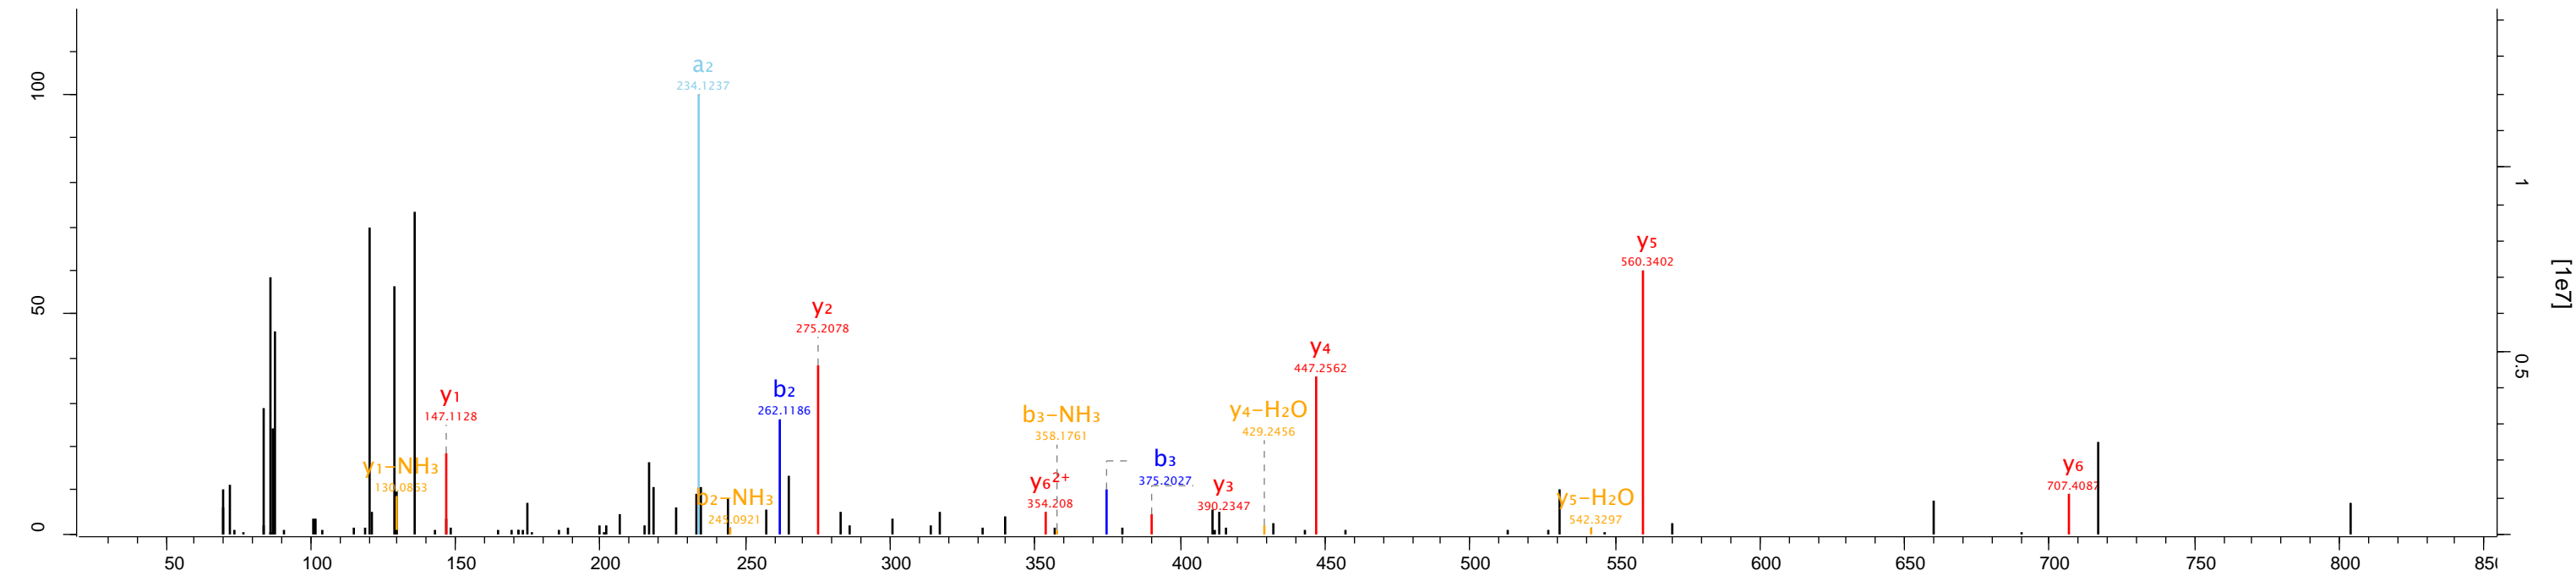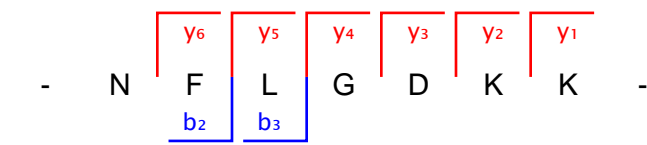

Raw file: 20140827\_EXQ00\_FaHo\_SA\_SWI3\_01  
 Scan: 4734 Method: FTMS; HCD Score: 67.23 m/z: 672.84 Gene names: ATP3

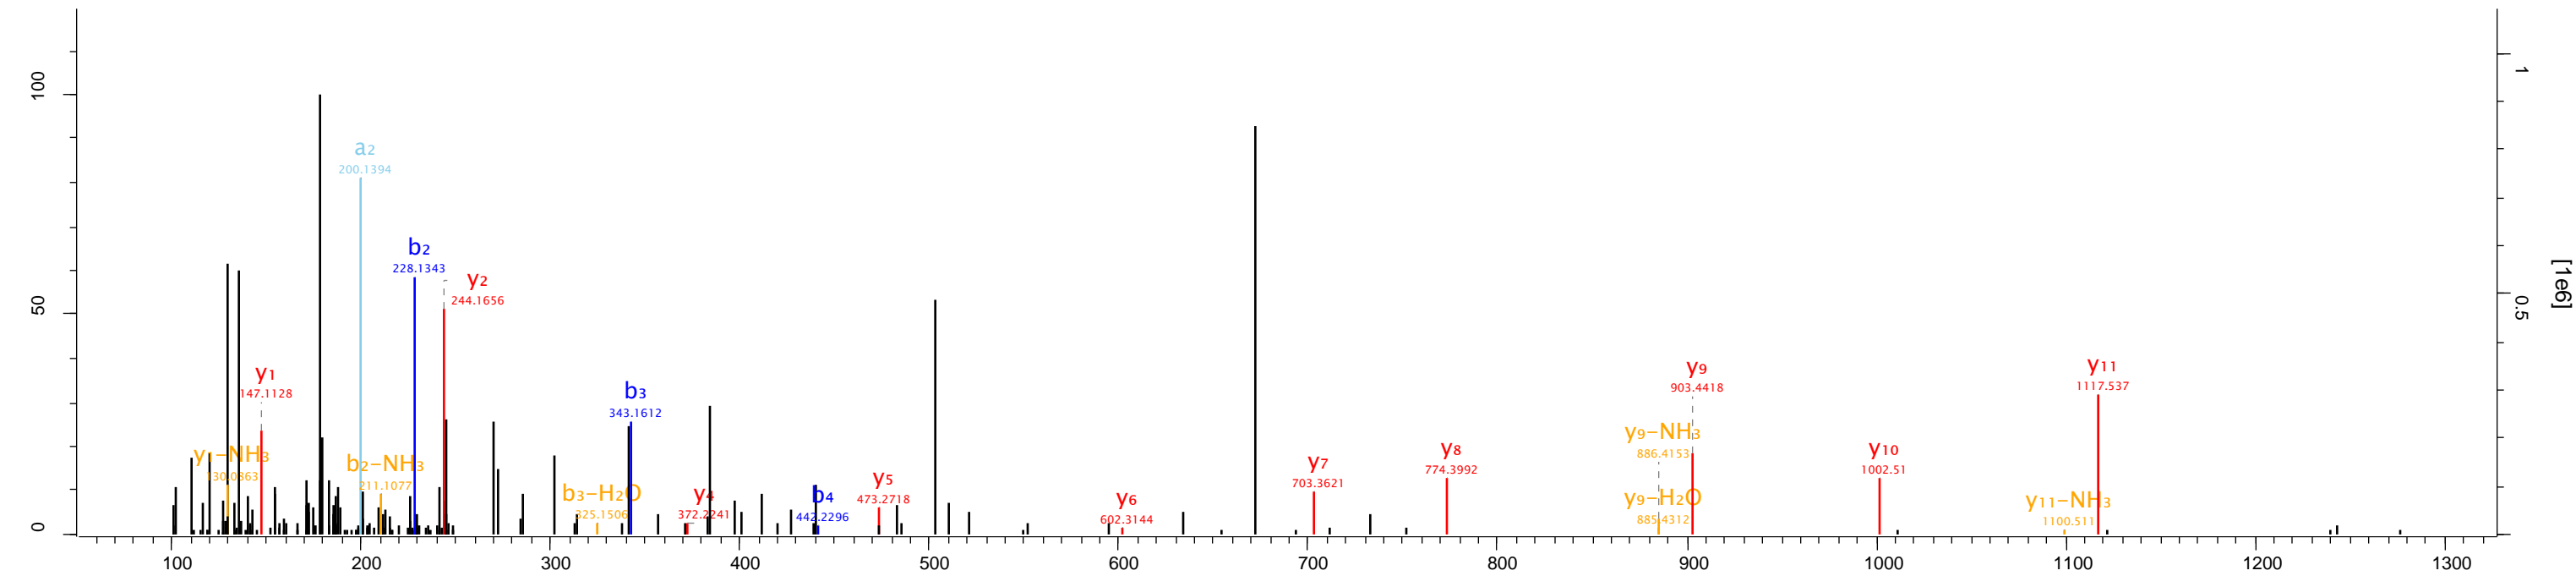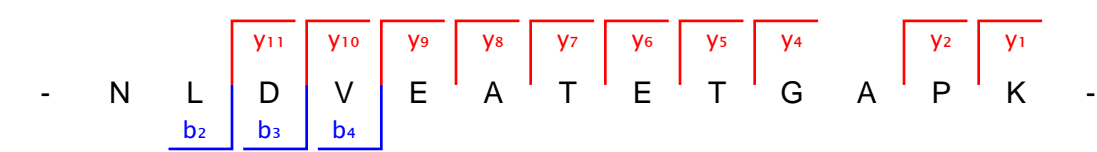

Raw file: 20140827\_EXQ00\_FaHo\_SA\_SWI3\_01  
 Scan: 5969 Method: FTMS; HCD Score: 136.57 m/z: 753.88 Gene names: RPL4B;RPL4A

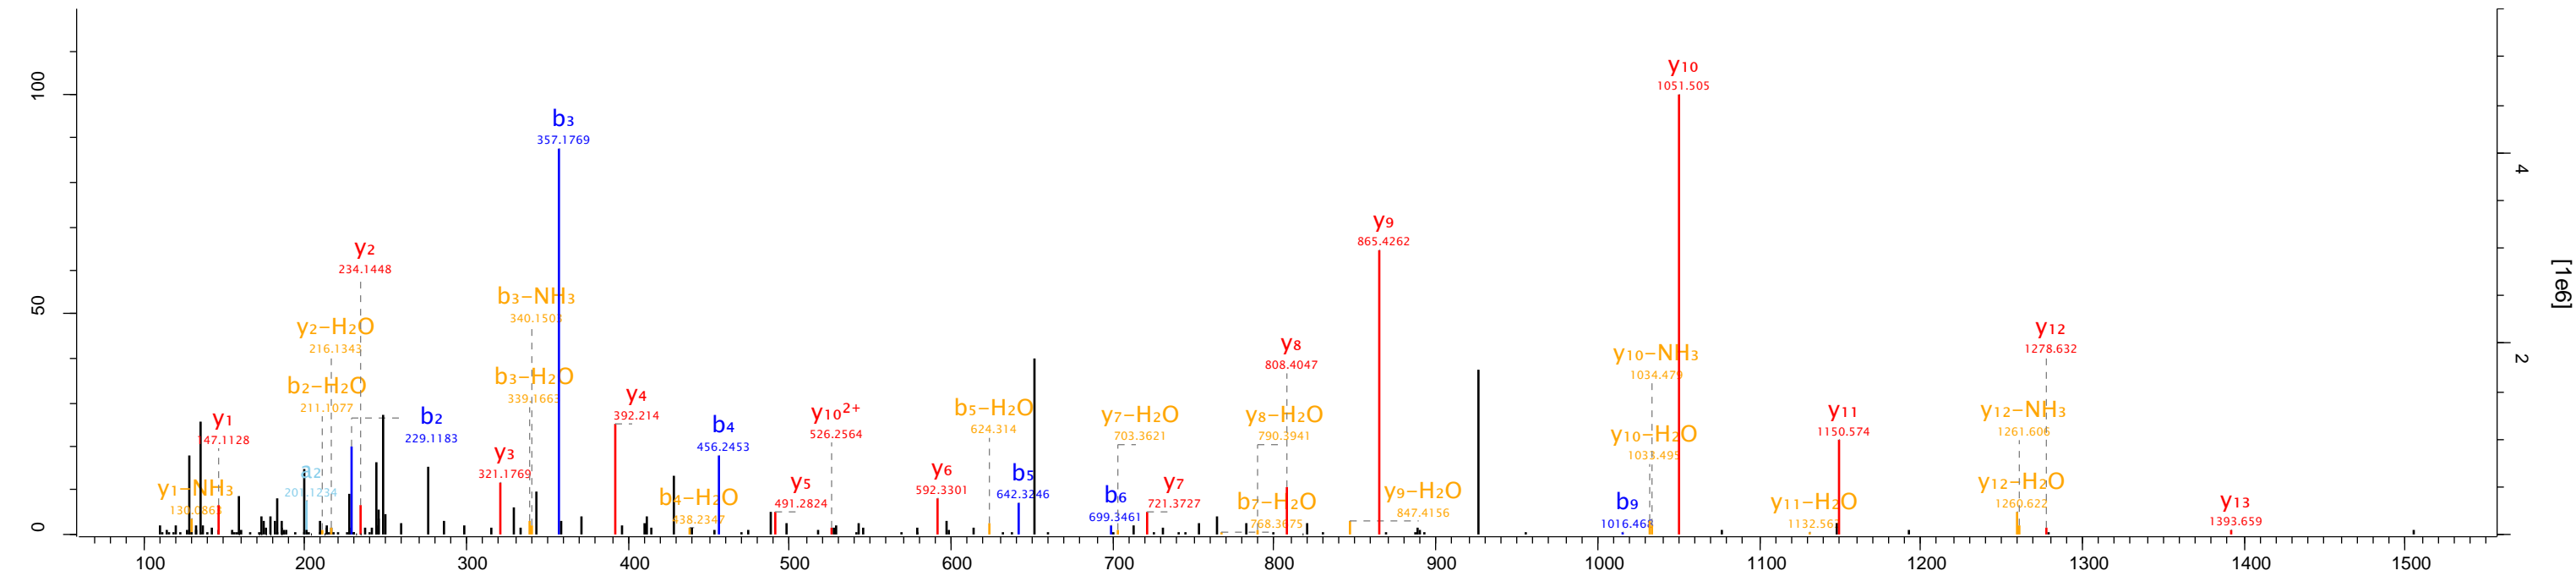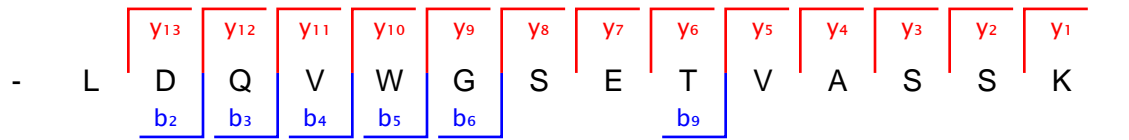

Raw file 20140827\_EXQ00\_FaHo\_SA\_SWI3\_02 Scan 3187 Method FTMS; HCD Score 85.55 m/z 676.31 Gene names RPB8

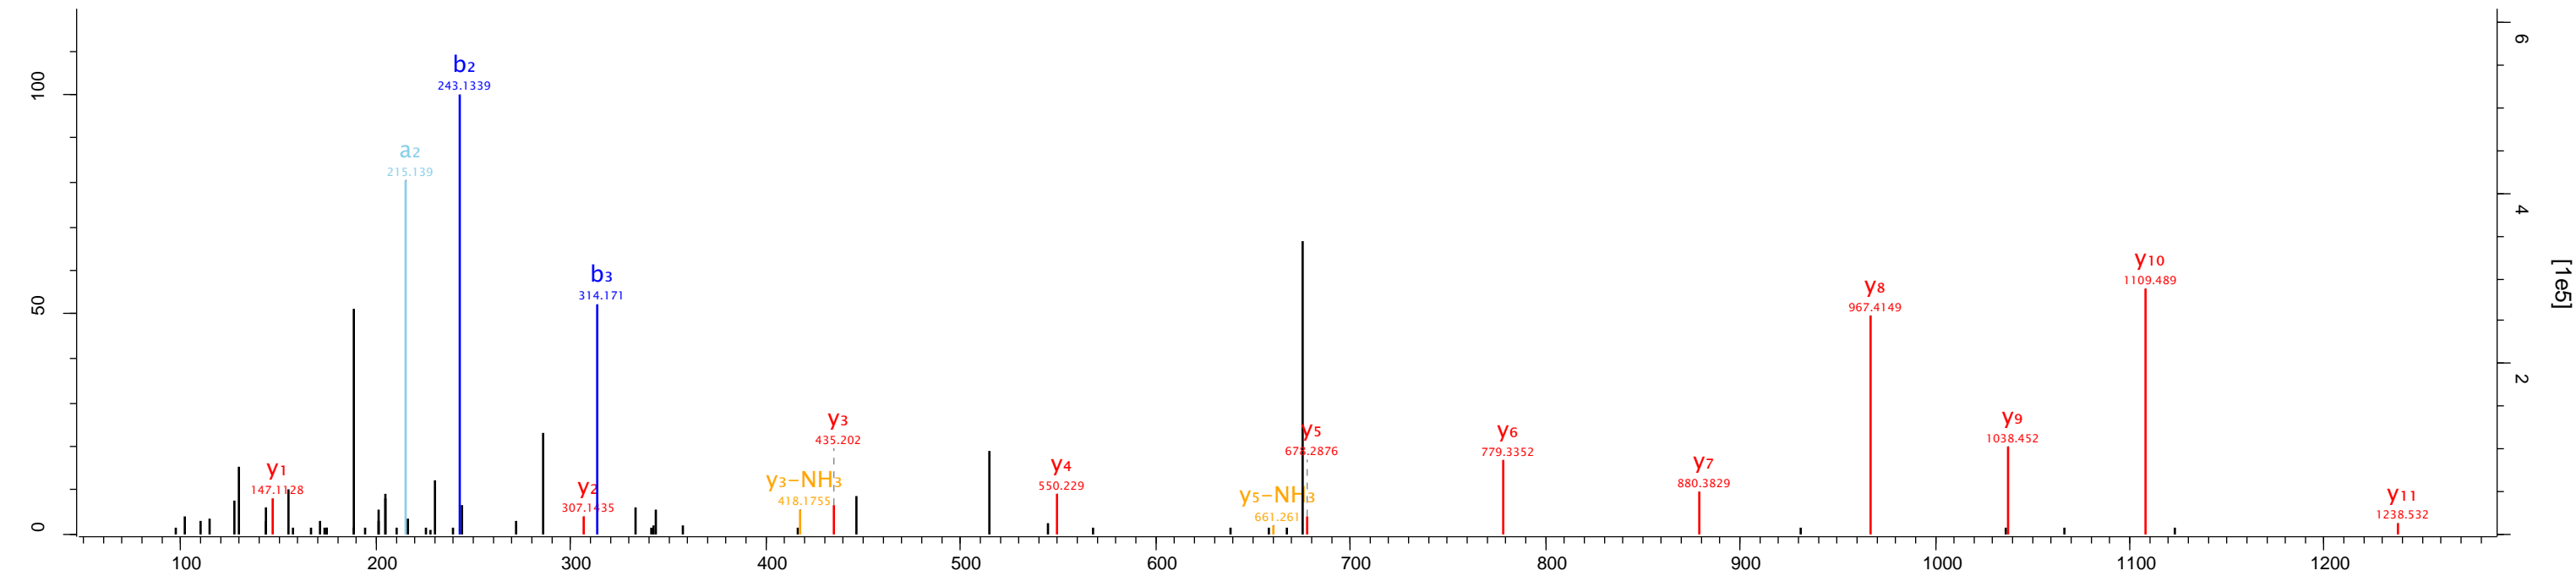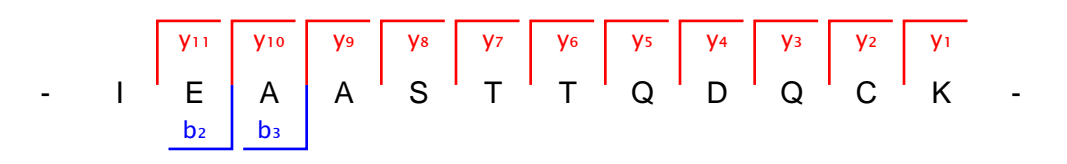

Raw file 20140827\_EXQ00\_FaHo\_SA\_SWI3\_02 Scan 4798 Method FTMS; HCD Score 81.78 m/z 440.24 Gene names PDR5;PDR15

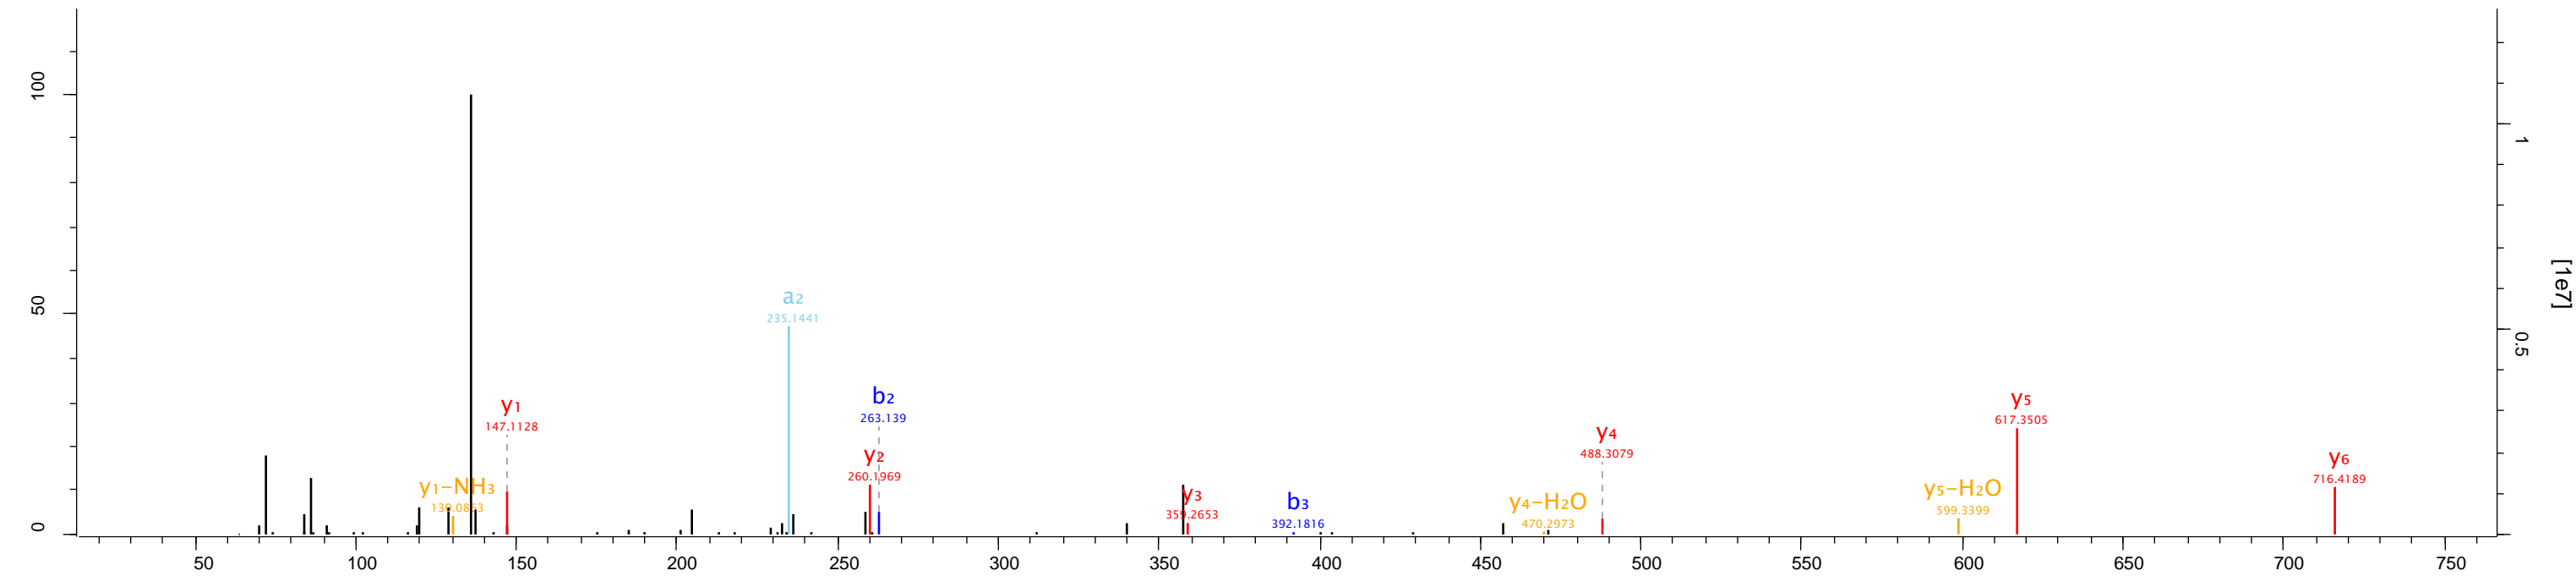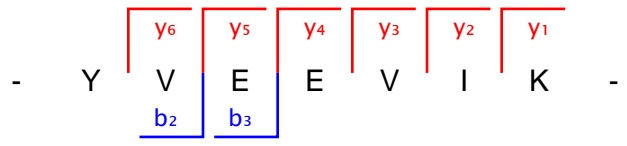

Raw file 20140827\_EXQ00\_FaHo\_SA\_SWI3\_02 Scan 4888 Method FTMS; HCD Score 143.98 m/z 708.35 Gene names RPS14B;RPS14A

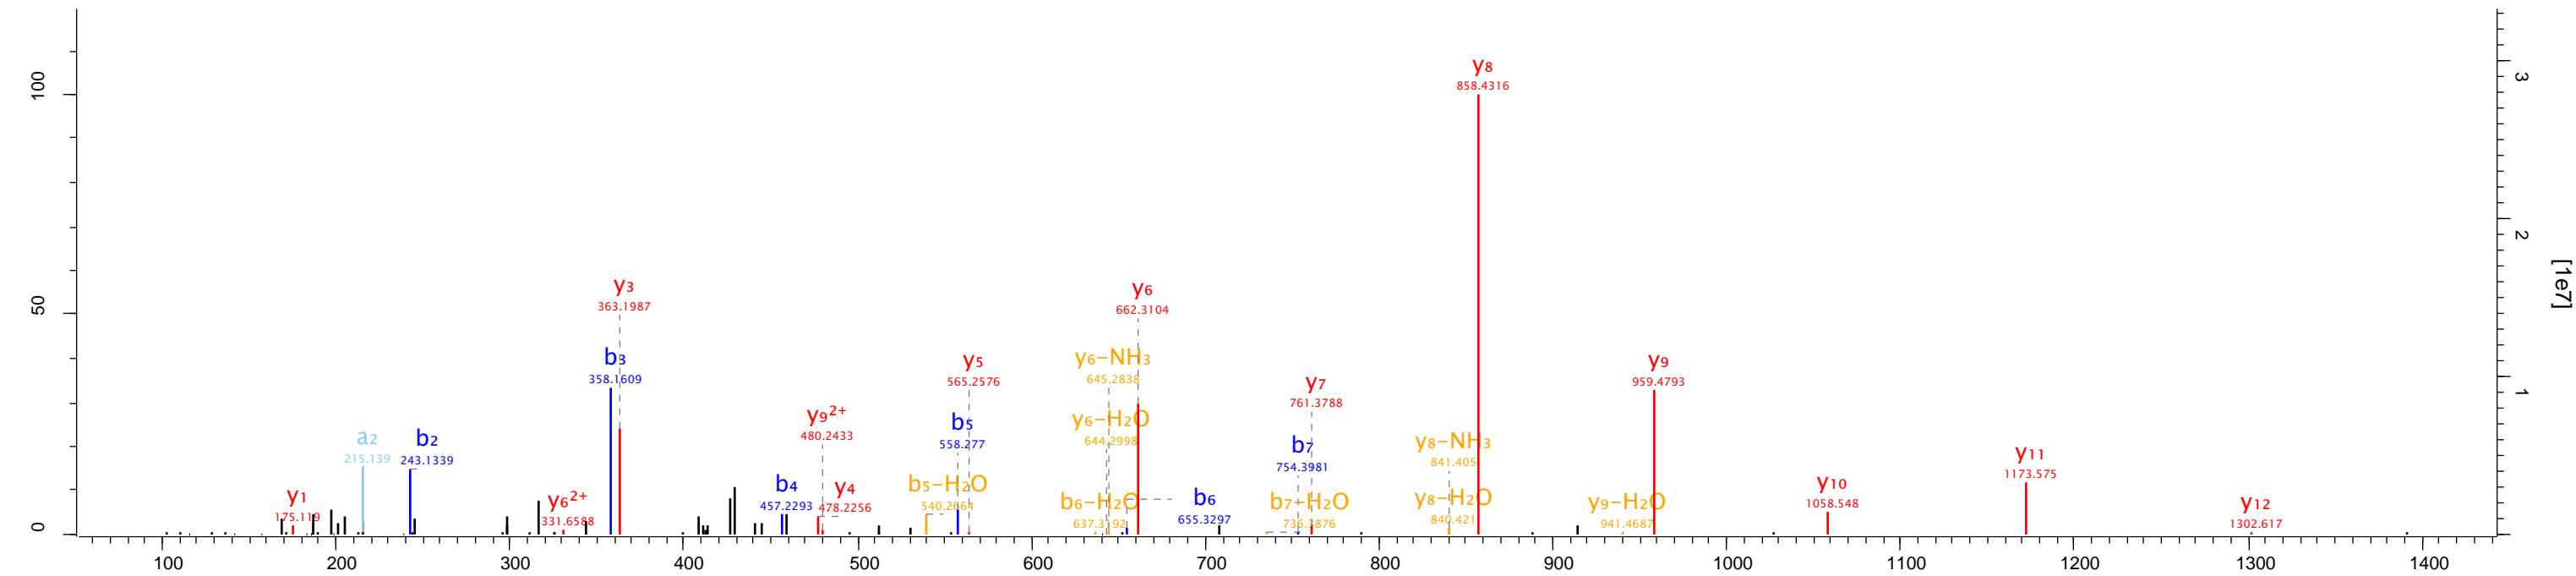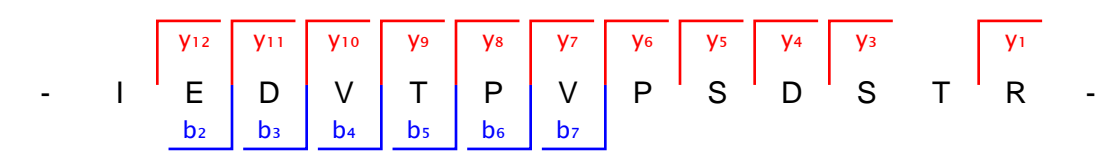

Raw file 20140827\_EXQ00\_FaHo\_SA\_SWI3\_02 Scan 6041 Method FTMS; HCD Score 214.16 m/z 901.14 Gene names RPL17A;RPL17B

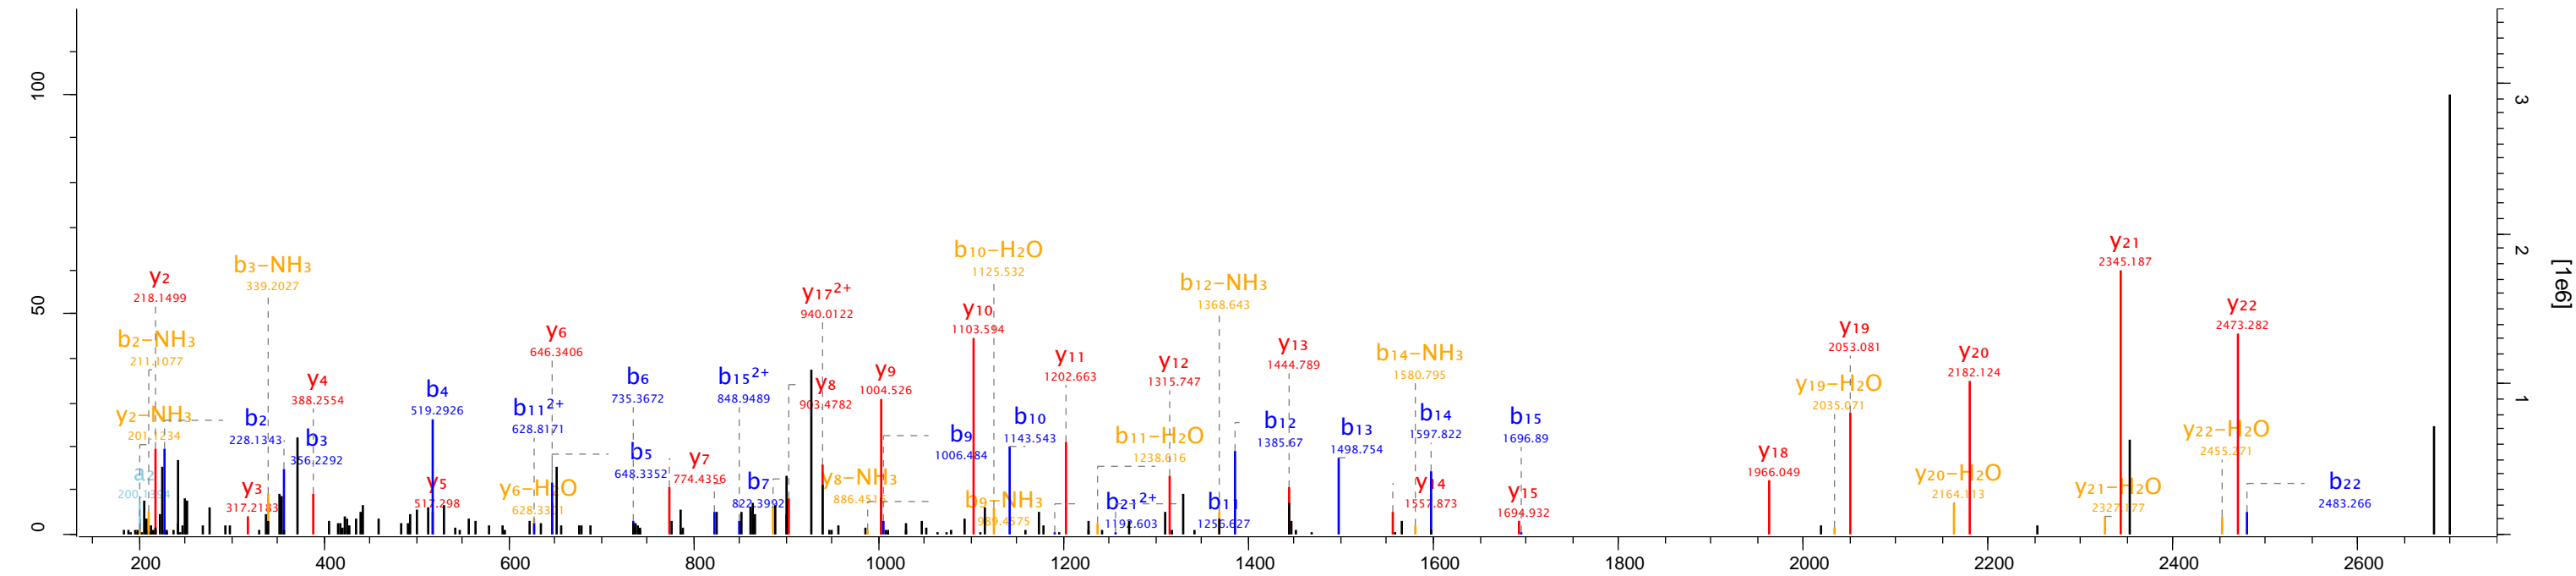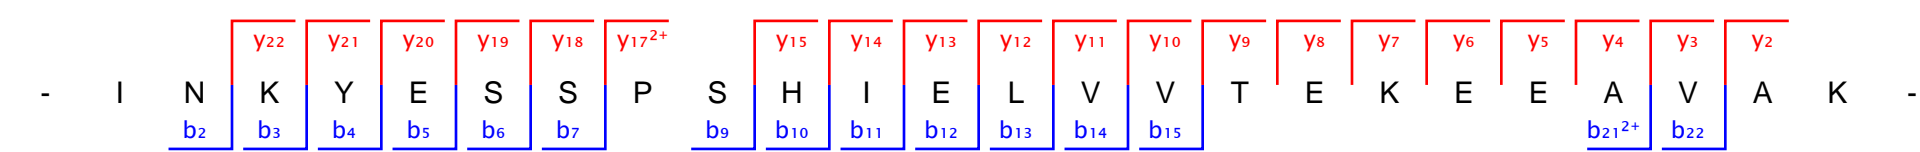



Raw file: 20140827\_EXQ00\_FaHo\_SA\_SWI3\_02  
 Scan: 8547 Method: FTMS; HCD Score: 64.82 m/z: 576.3 Gene names: APT1

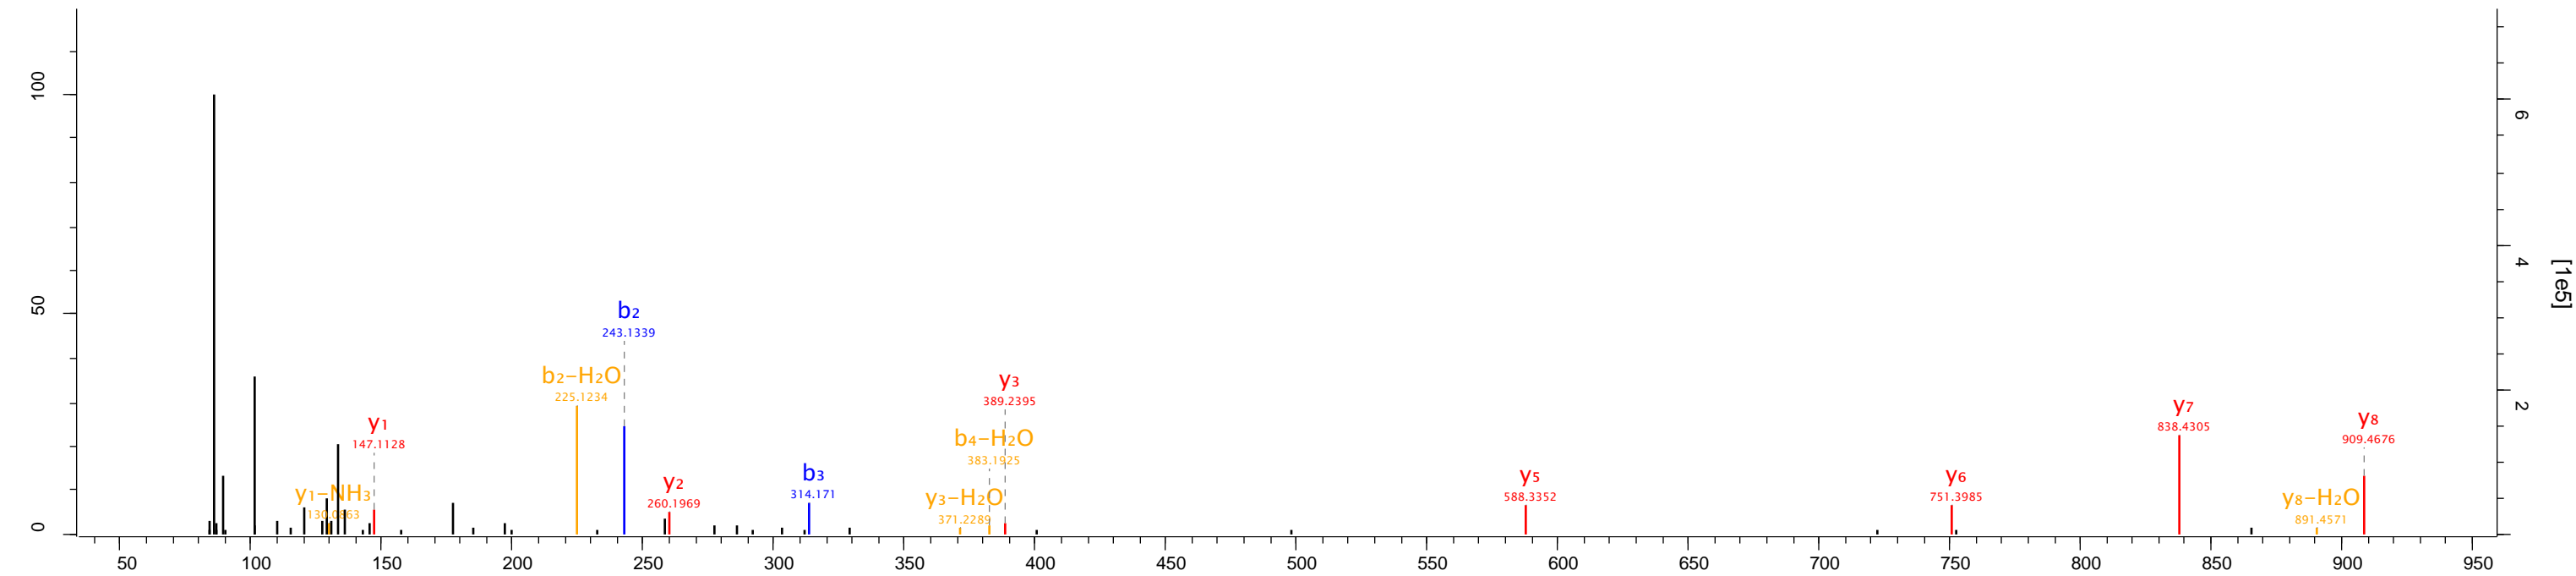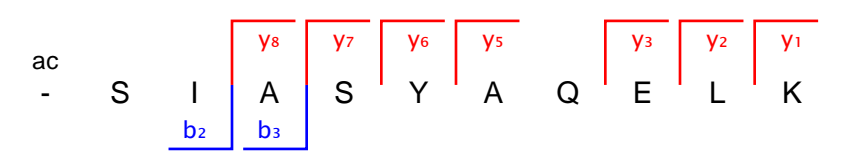

Raw file 20140827\_EXQ00\_FaHo\_SA\_SWI3\_03 Scan 8116 Method FTMS; HCD Score 73.88 m/z 702.35 Gene names RPS0A;RPS0B

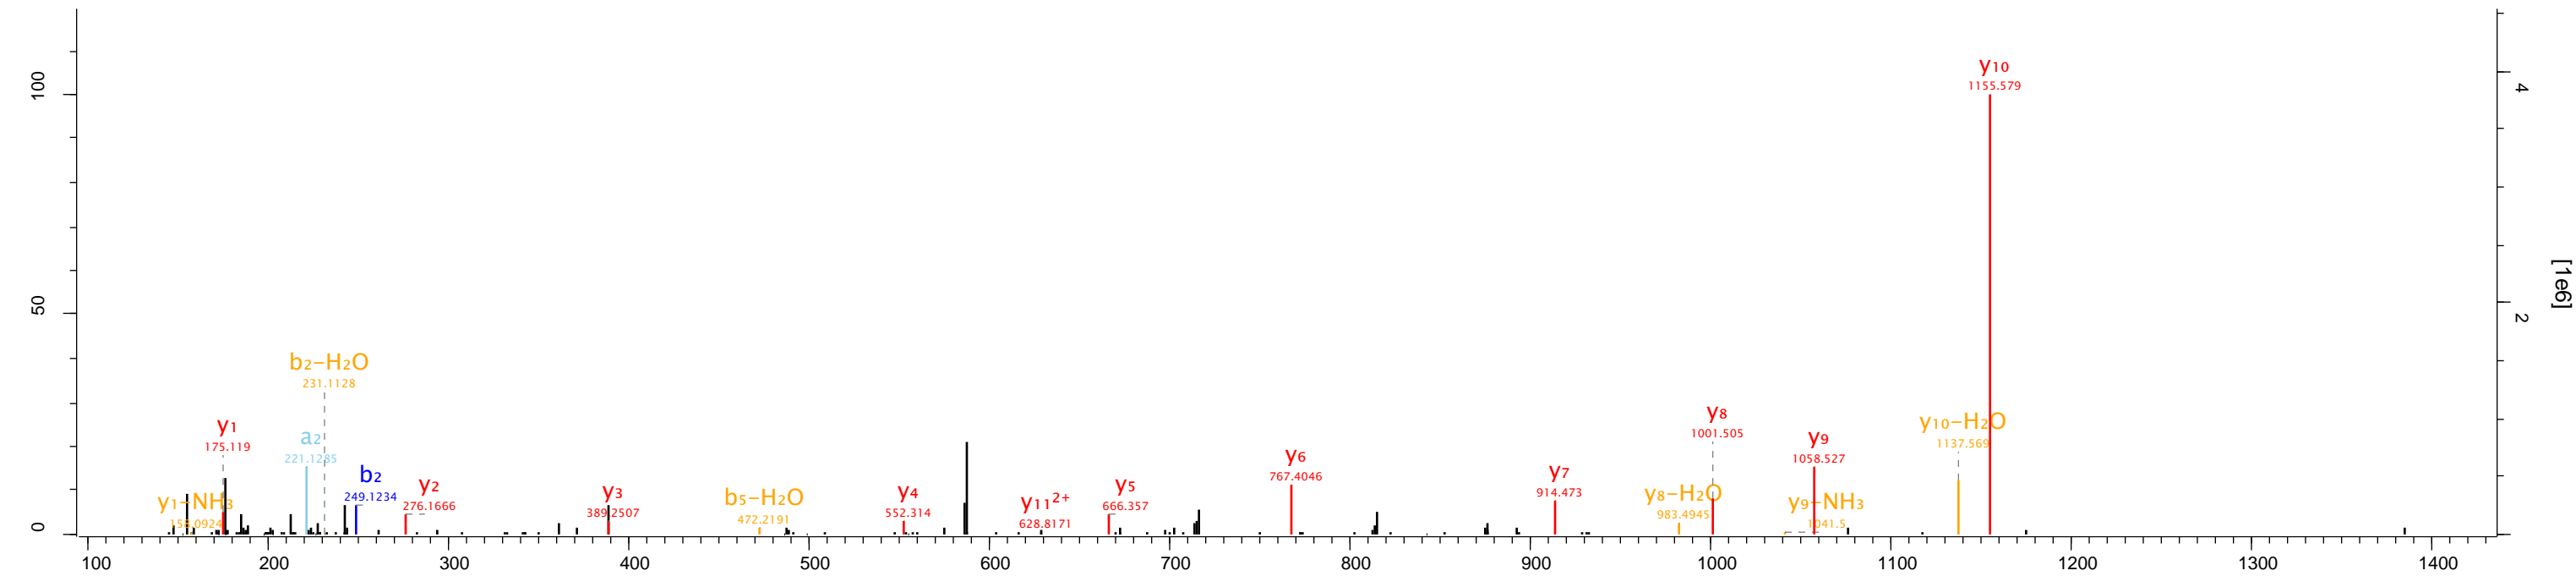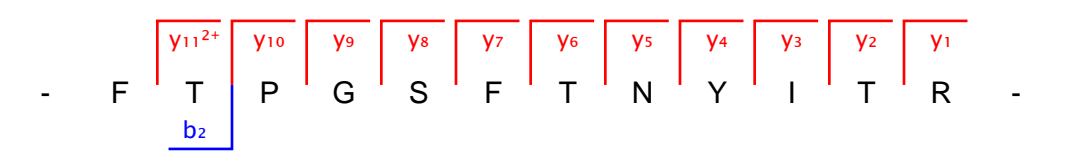

Raw file 20140827\_EXQ00\_FaHo\_SA\_YNG2\_01 Scan 4028 Method FTMS; HCD Score 35.15 m/z 380.17

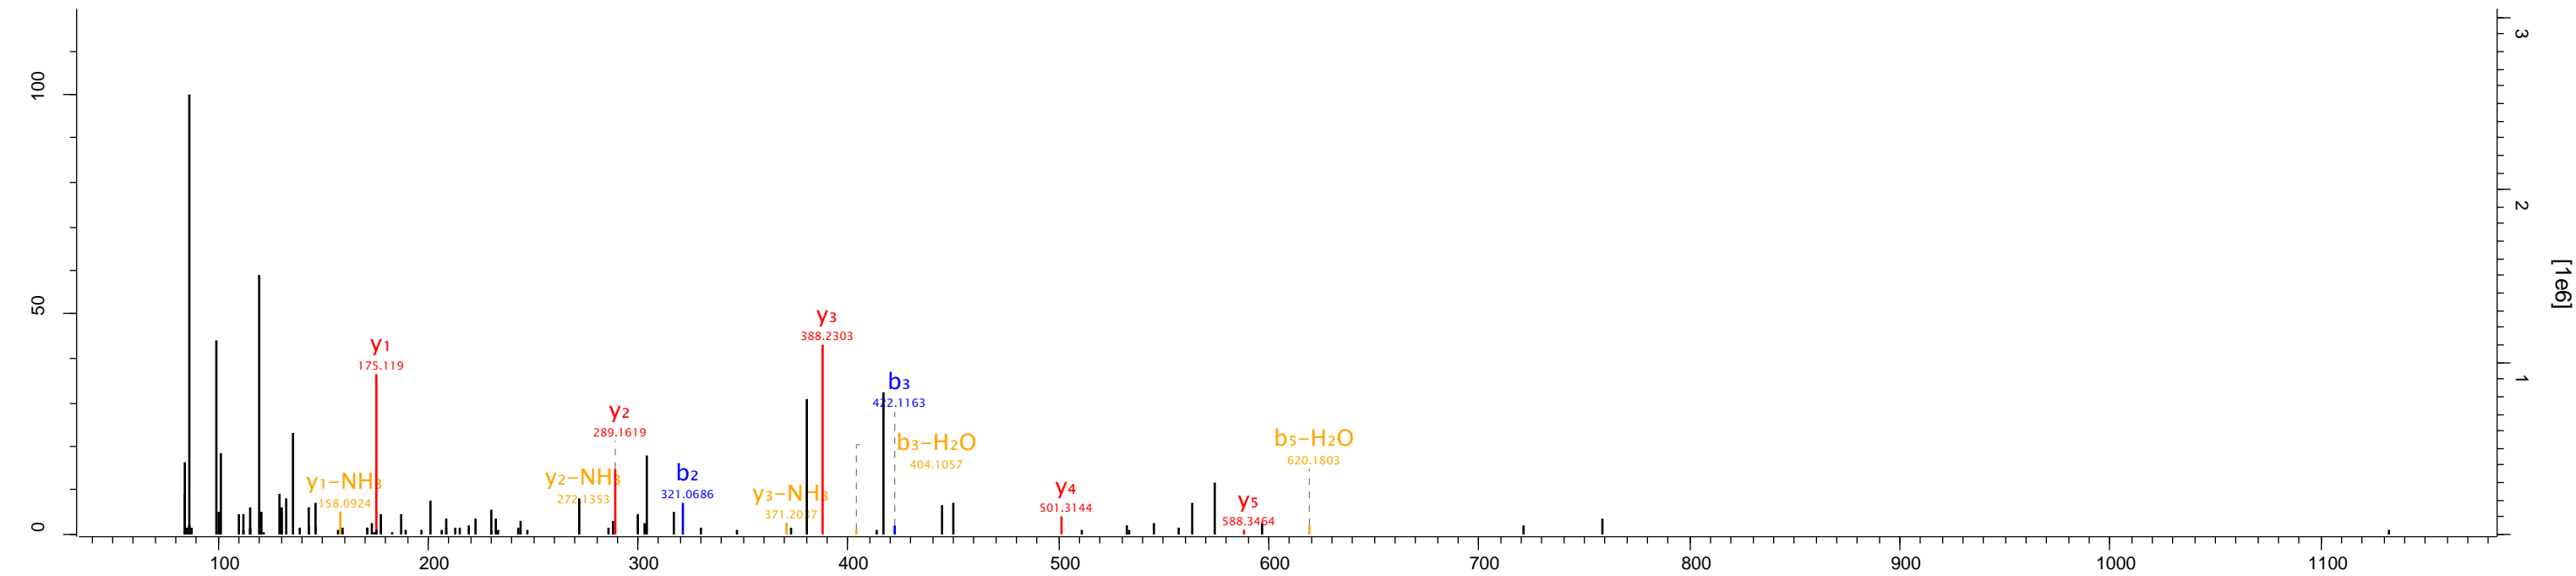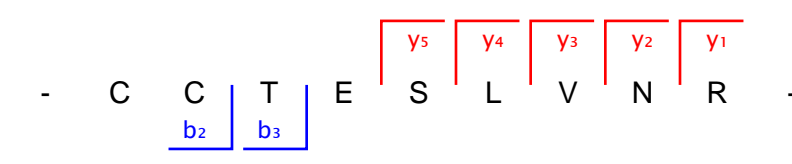

Raw file 20140827\_EXQ00\_FaHo\_SA\_YNG2\_01 Scan 5103 Method FTMS; HCD Score 147.2 m/z 599.76 Gene names PDR5;PDR15;PDR10

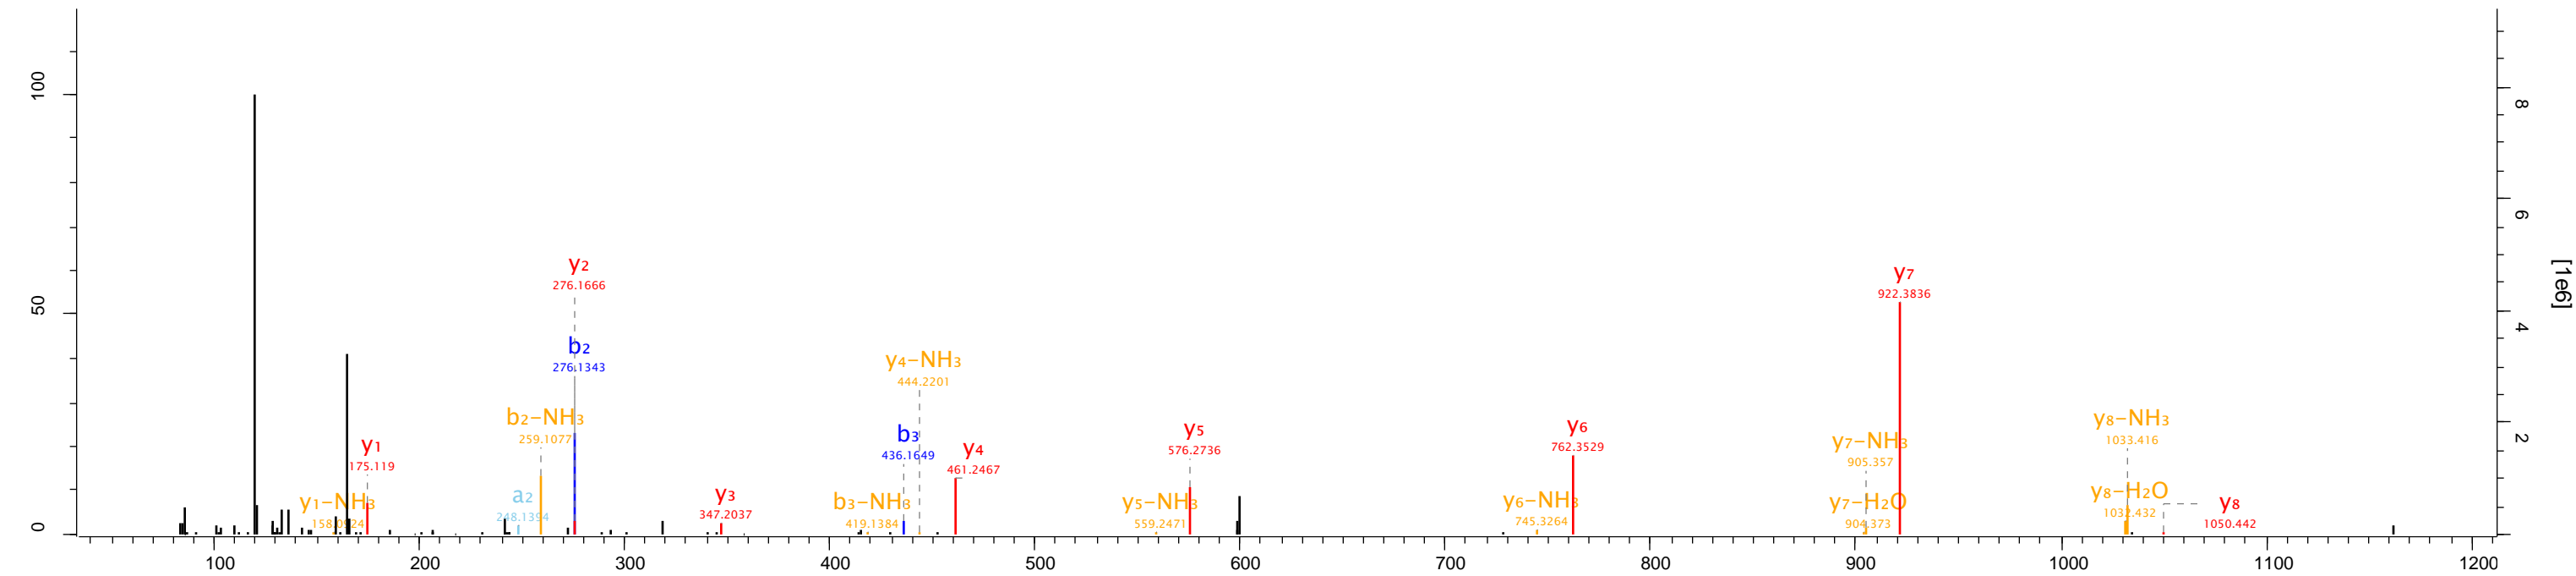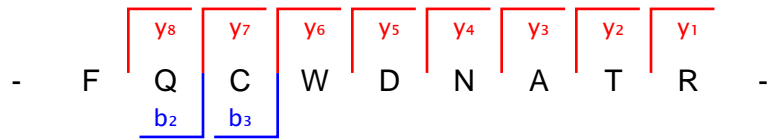

Raw file 20140827\_EXQ00\_FaHo\_SA\_YNG2\_01 Scan 5622 Method FTMS; HCD Score 80.74 m/z 562.97 Gene names RPL4B

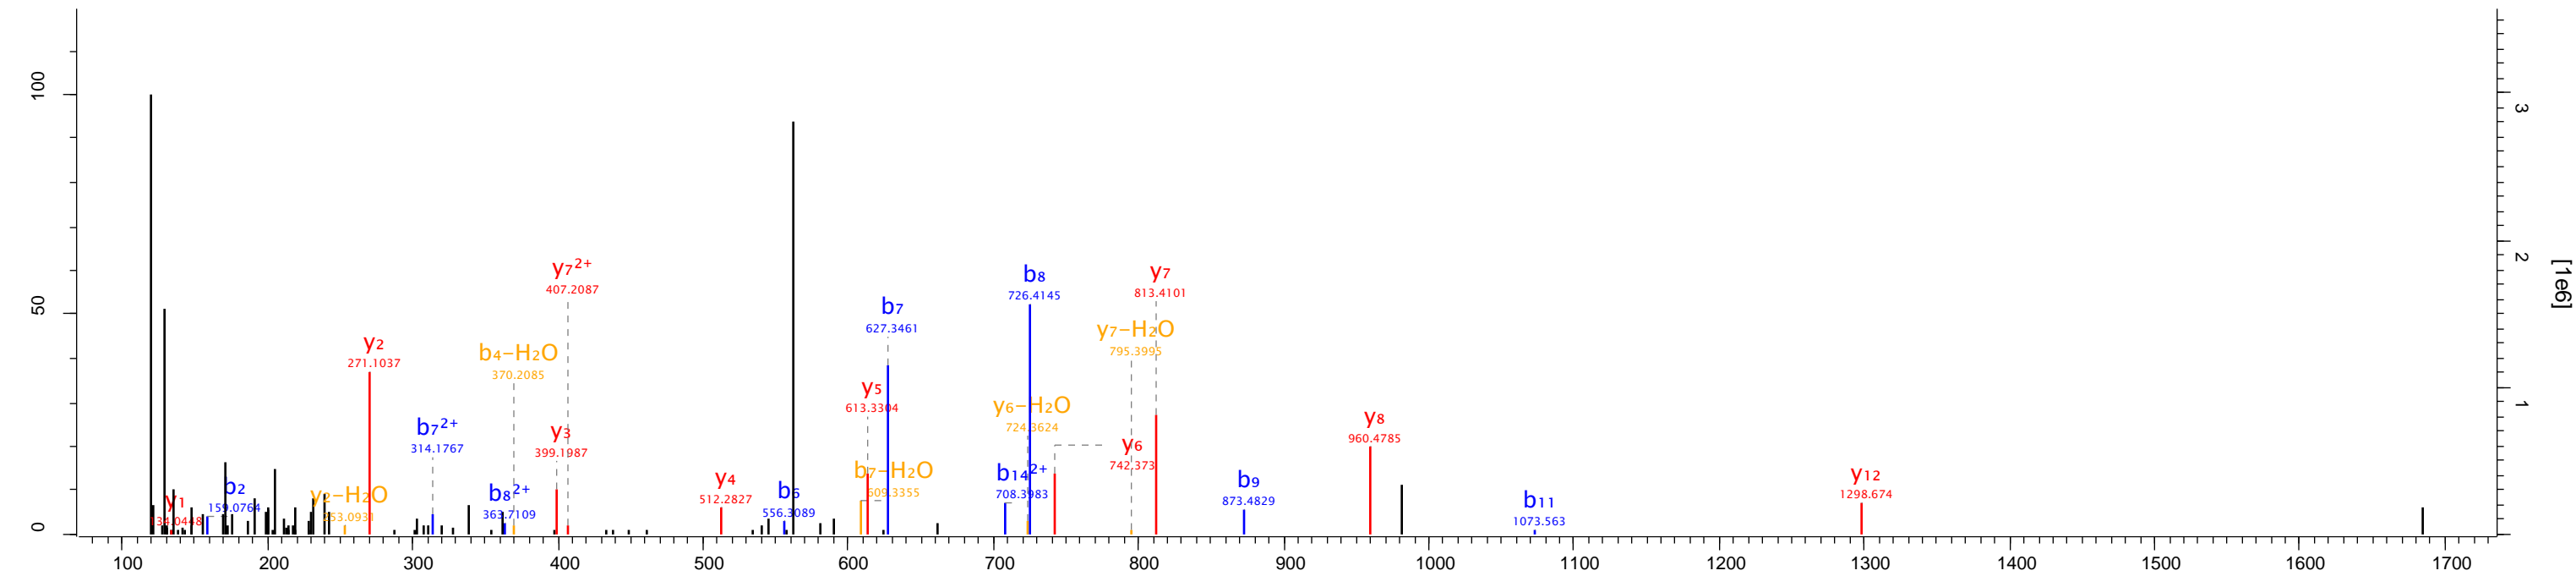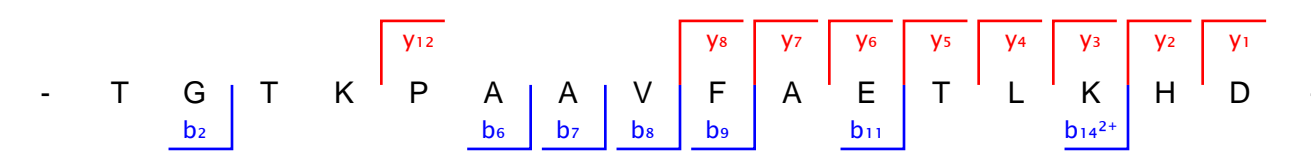

Raw file 20140827\_EXQ00\_FaHo\_SA\_YNG2\_01 Scan 6447 Method FTMS; HCD Score 195.03 m/z 705.12 Gene names RPS0A;RPS0B

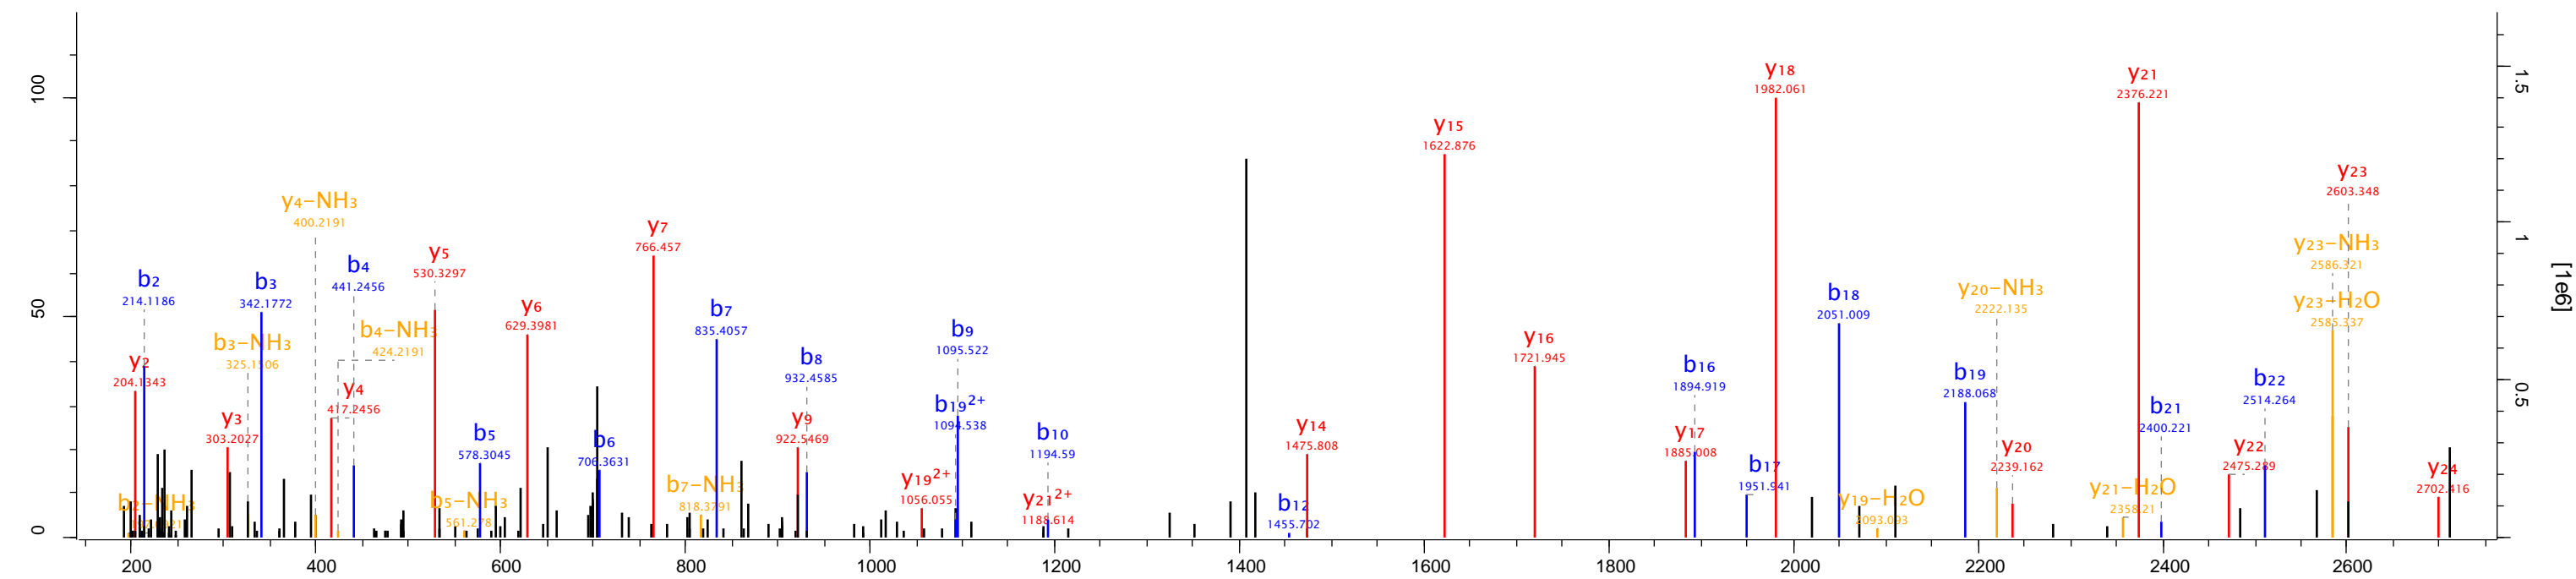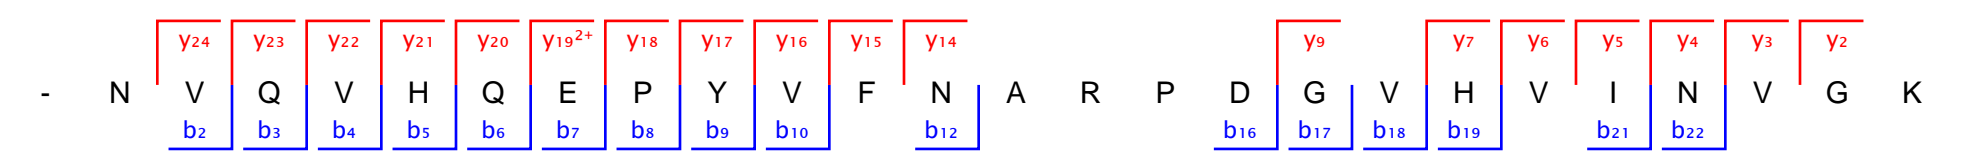

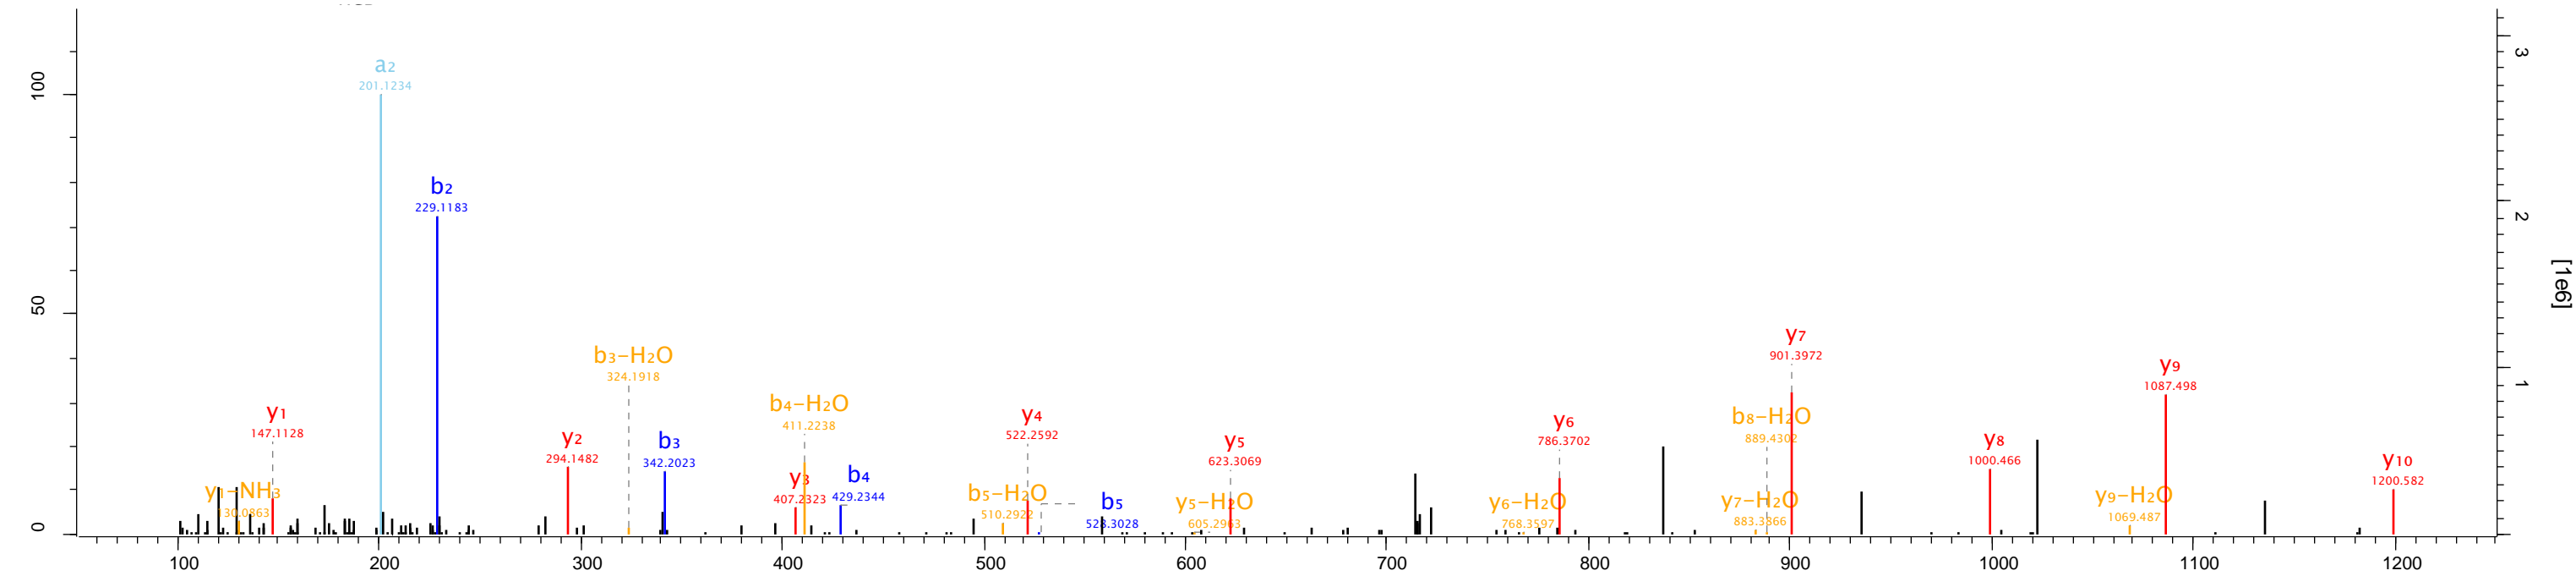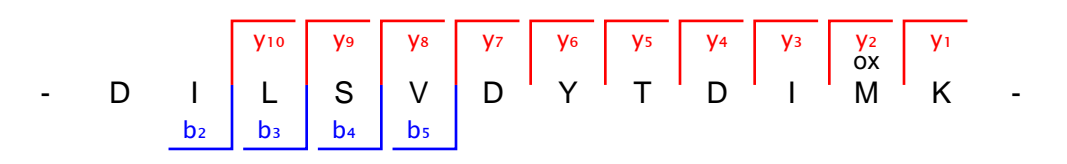

Raw file: 20140827\_EXQ00\_FaHo\_SA\_YNG2\_02  
 Scan: 3421 Method: FTMS; HCD Score: 124.46 m/z: 784.38 Gene names: SUR4

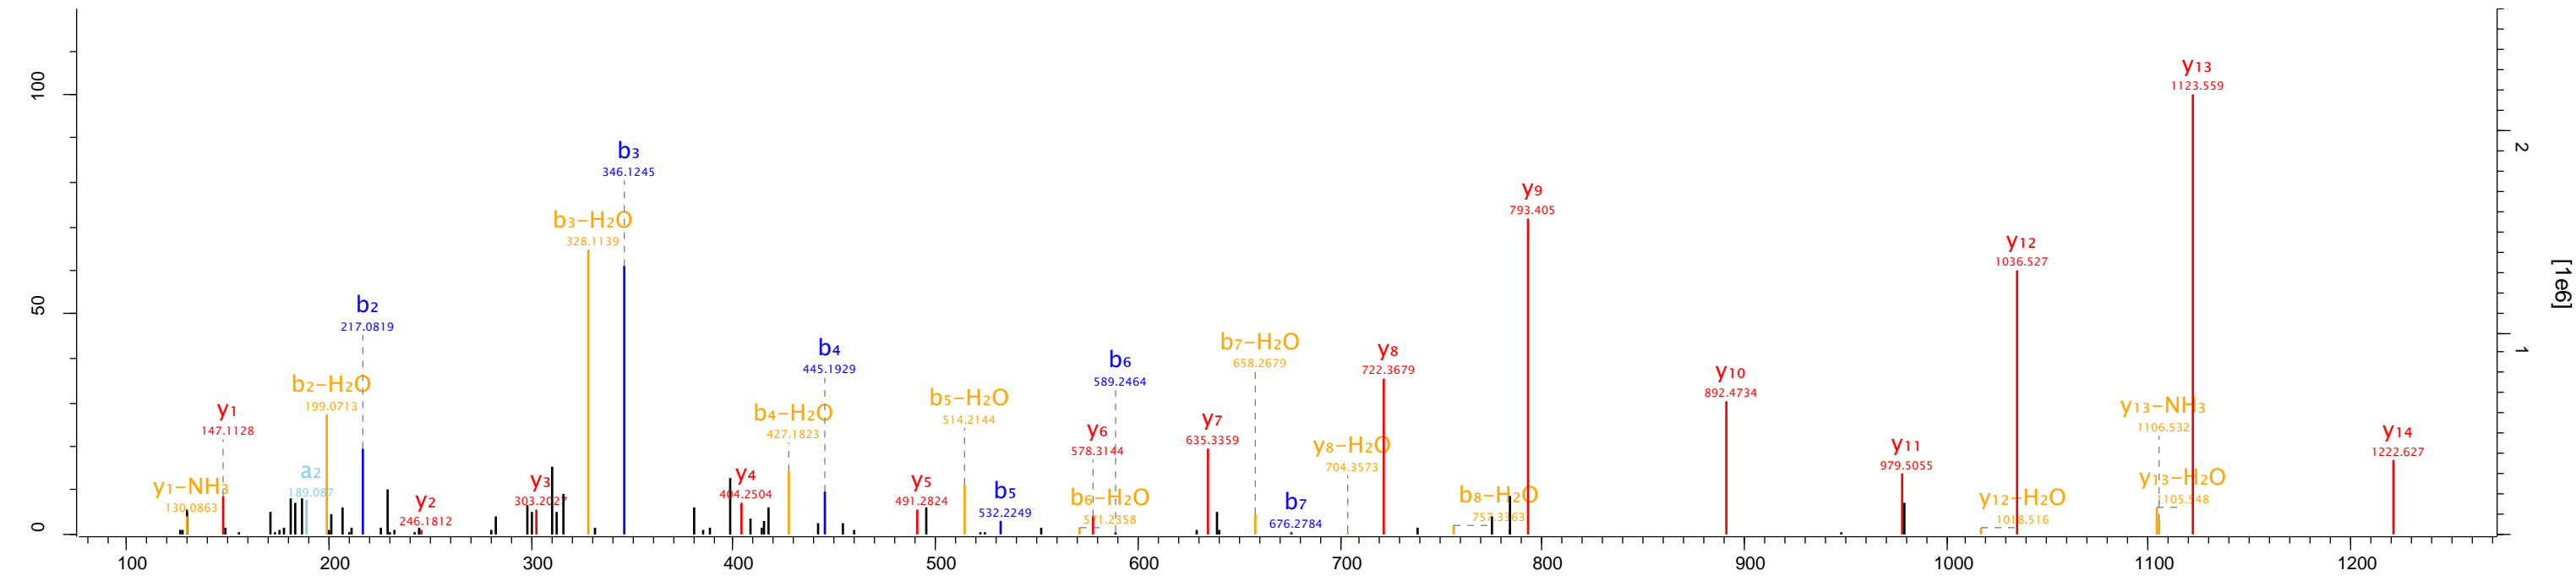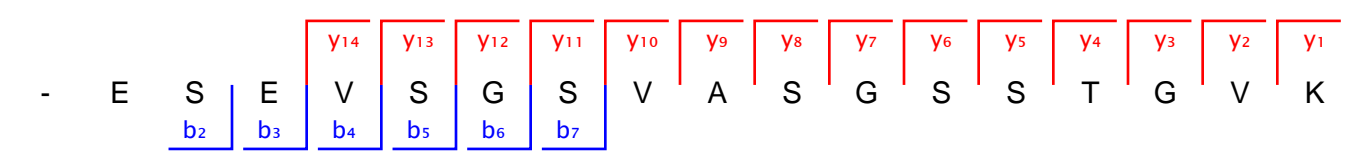



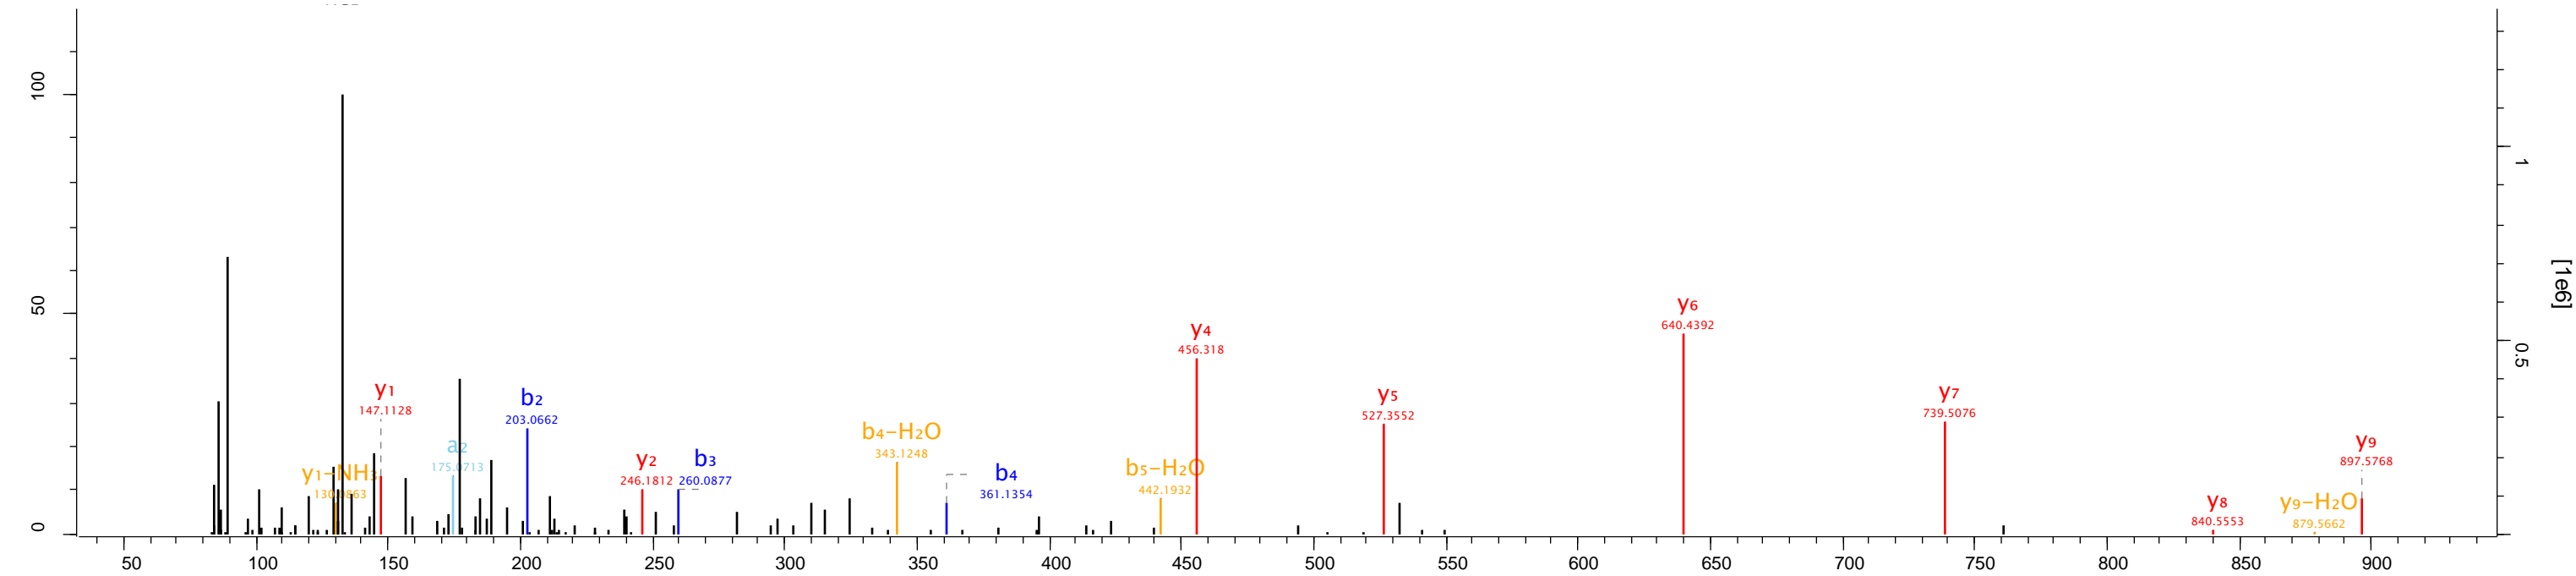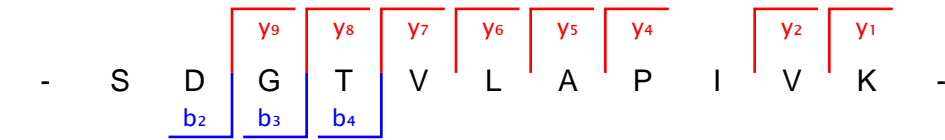

20140827\_EXQ00\_FaHo\_SA\_YNG2\_03 2422 FTMS; HCD 49.65 413.69 TY1B-LR3;TY1B-OL;TY1B-LR4;TY1B-LR2;TY1B-PL;TY1B-ER1;TY1B-PR3;TY1B-H;TY1B-GR2;TY1B-MR2;TY1B-ER2;TY1B-OR;TY1B-BR;TY1B-DR1;TY1B-NL2;TY1B-LR1;TY1B-DR3;TY1B-NL1;TY1B-A;TY1B-BL;TY1B-MR1

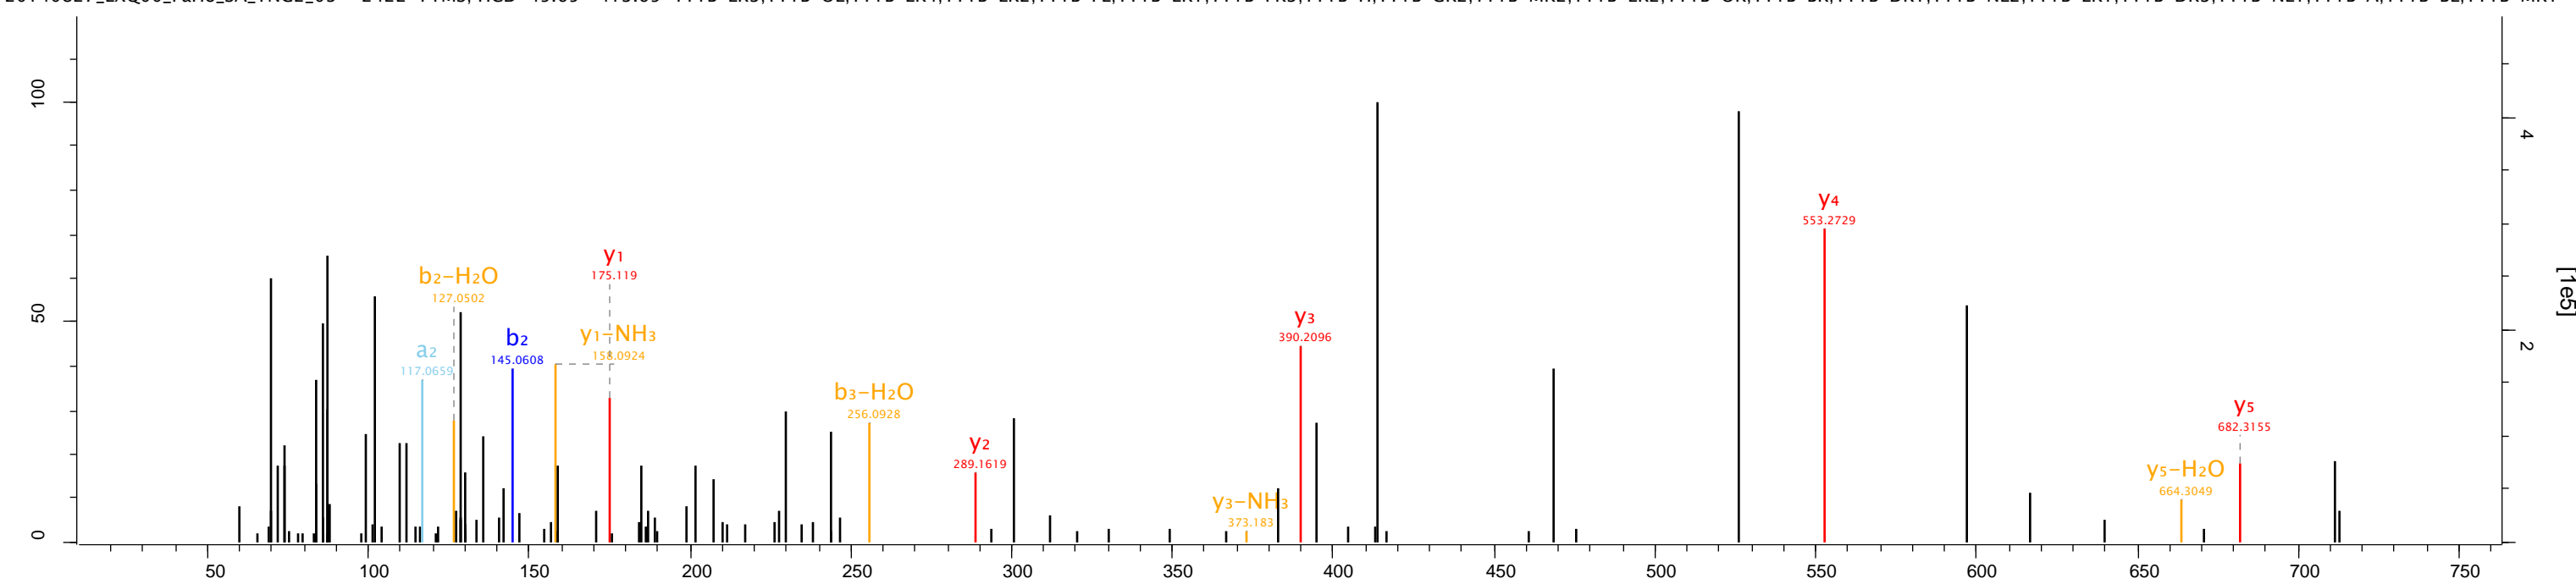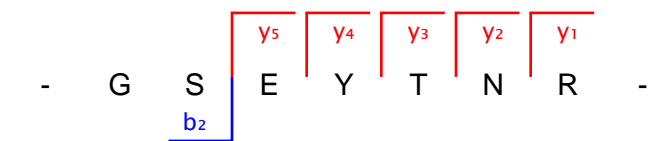

Raw file: 20140827\_EXQ00\_FaHo\_SA\_YNG2\_03  
 Scan: 3683 Method: FTMS; HCD Score: 157.3 m/z: 660.8 Gene names: TY1B-LR3;TY1B-GR2

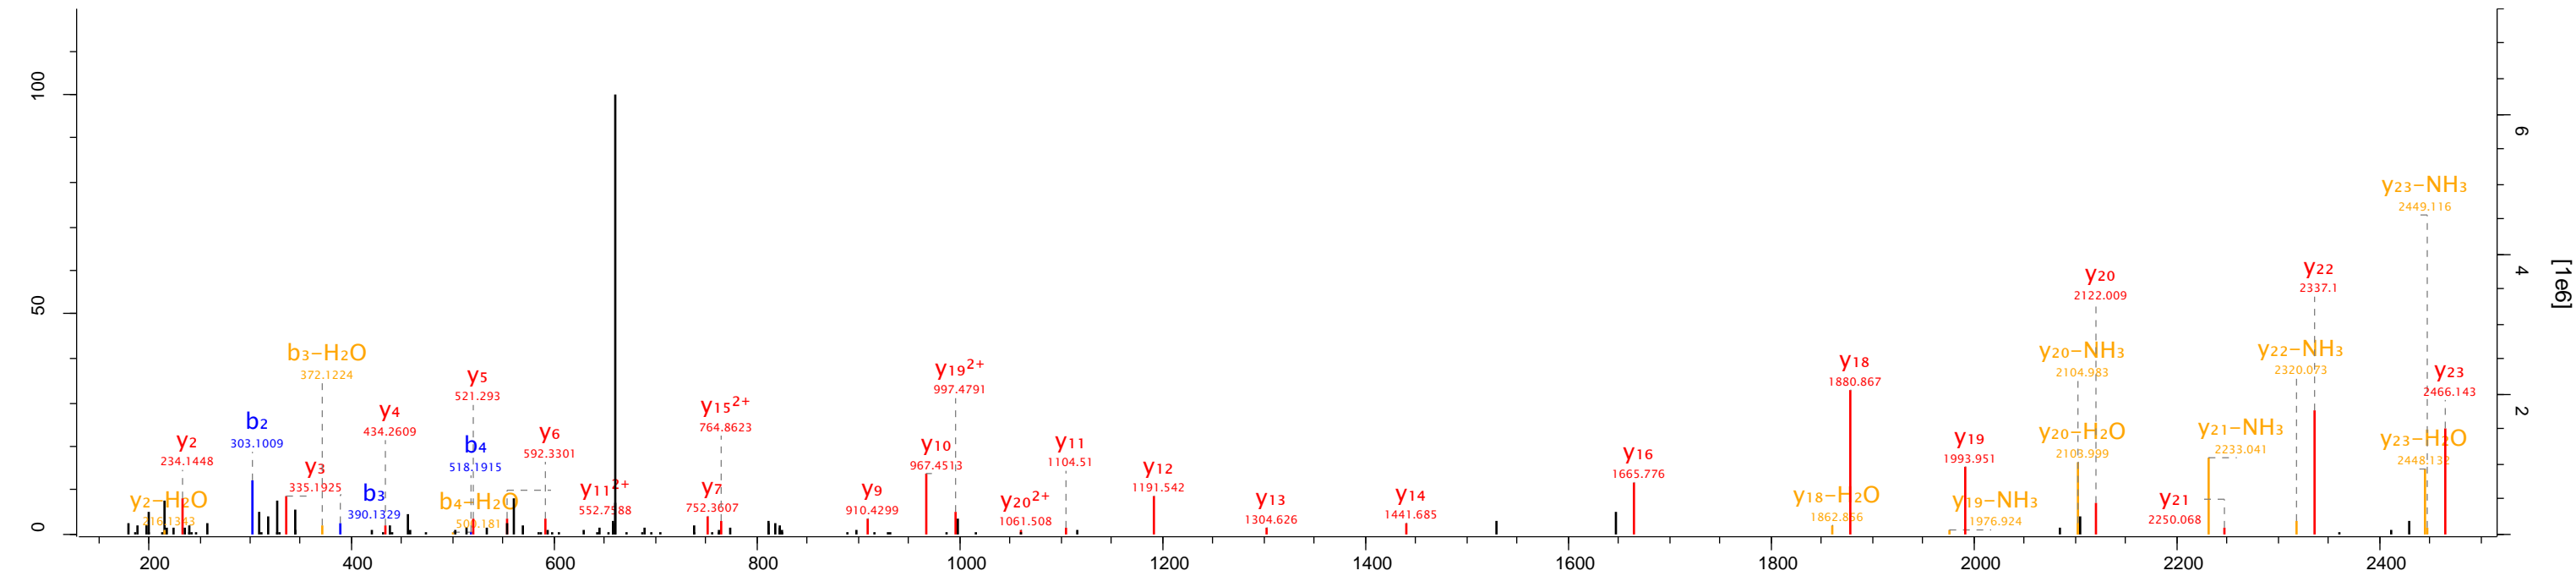

ac: M E S Q Q L S Q H S H I S H G S A C A S V T S K -

Fragmentation mapping (b and y ions):

- b2: E
- b3: S
- b4: Q
- y2: S
- y3: V
- y4: T
- y5: S
- y6: A
- y7: C
- y9: S
- y10: G
- y11: H
- y12: S
- y13: I
- y14: H
- y15<sup>2+</sup>: S
- y16: H
- y18: S
- y19: L
- y20: Q
- y21: Q
- y22: S
- y23: E

Raw file: 20140827\_EXQ00\_FaHo\_SA\_YNG2\_03  
 Scan: 4221 Method: FTMS; HCD Score: 85.81 m/z: 526.81 Gene names: RPS14B;RPS14A

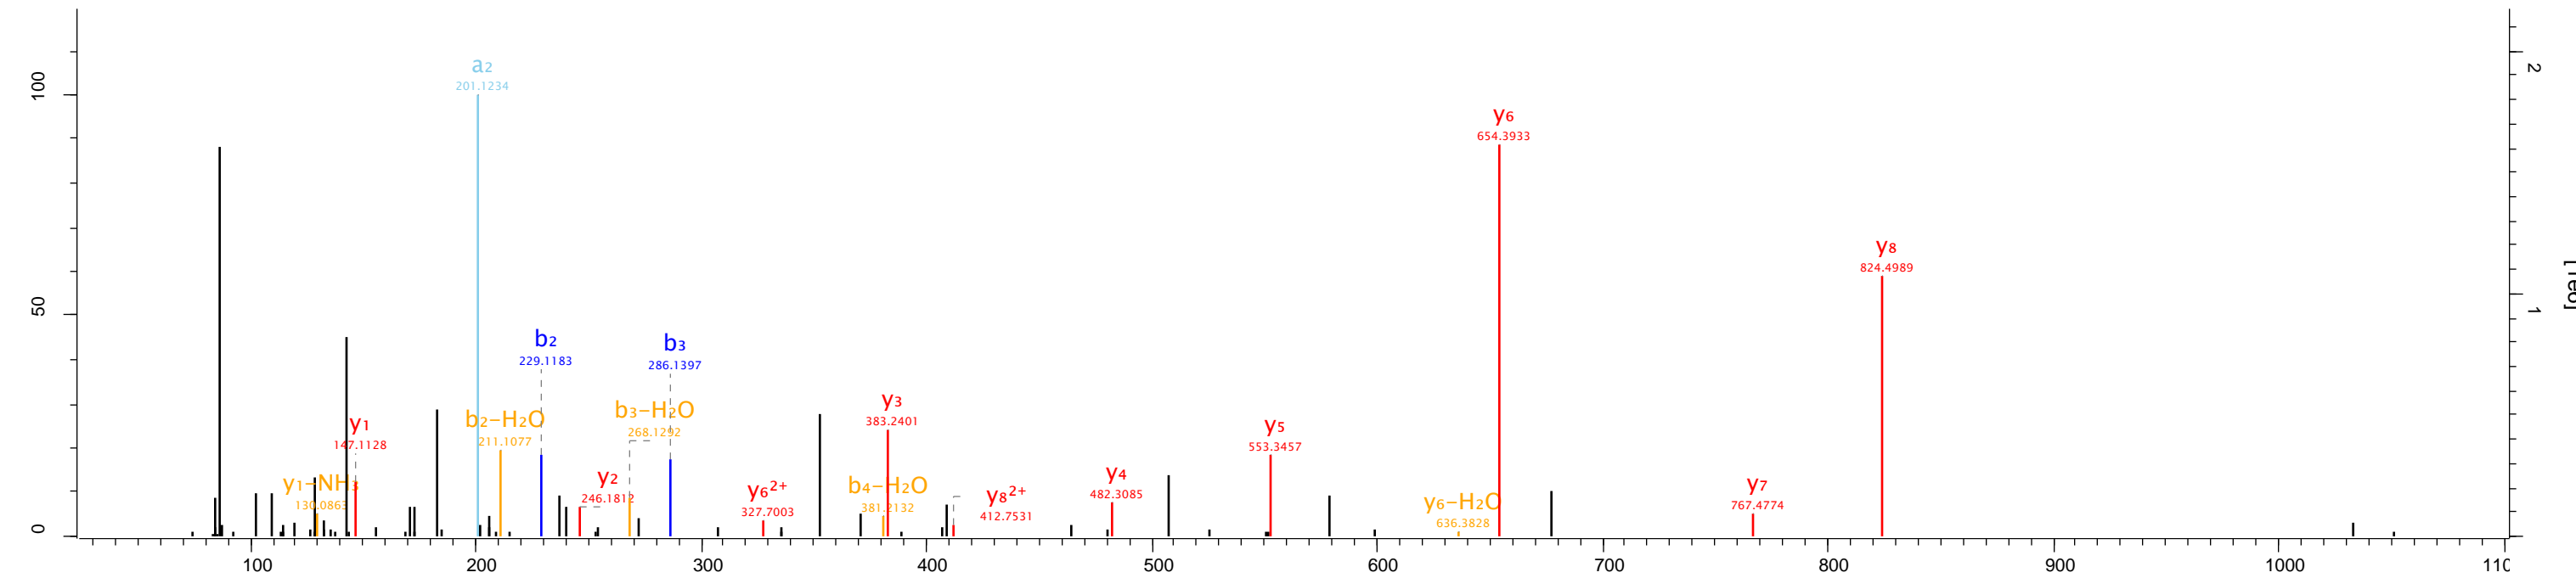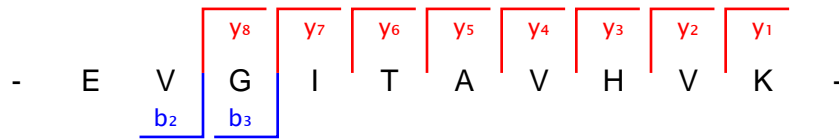

Raw file: 20140827\_EXQ00\_FaHo\_SA\_YNG2\_03  
 Scan: 5488 Method: FTMS; HCD Score: 99.69 m/z: 508.29 Gene names: YET1

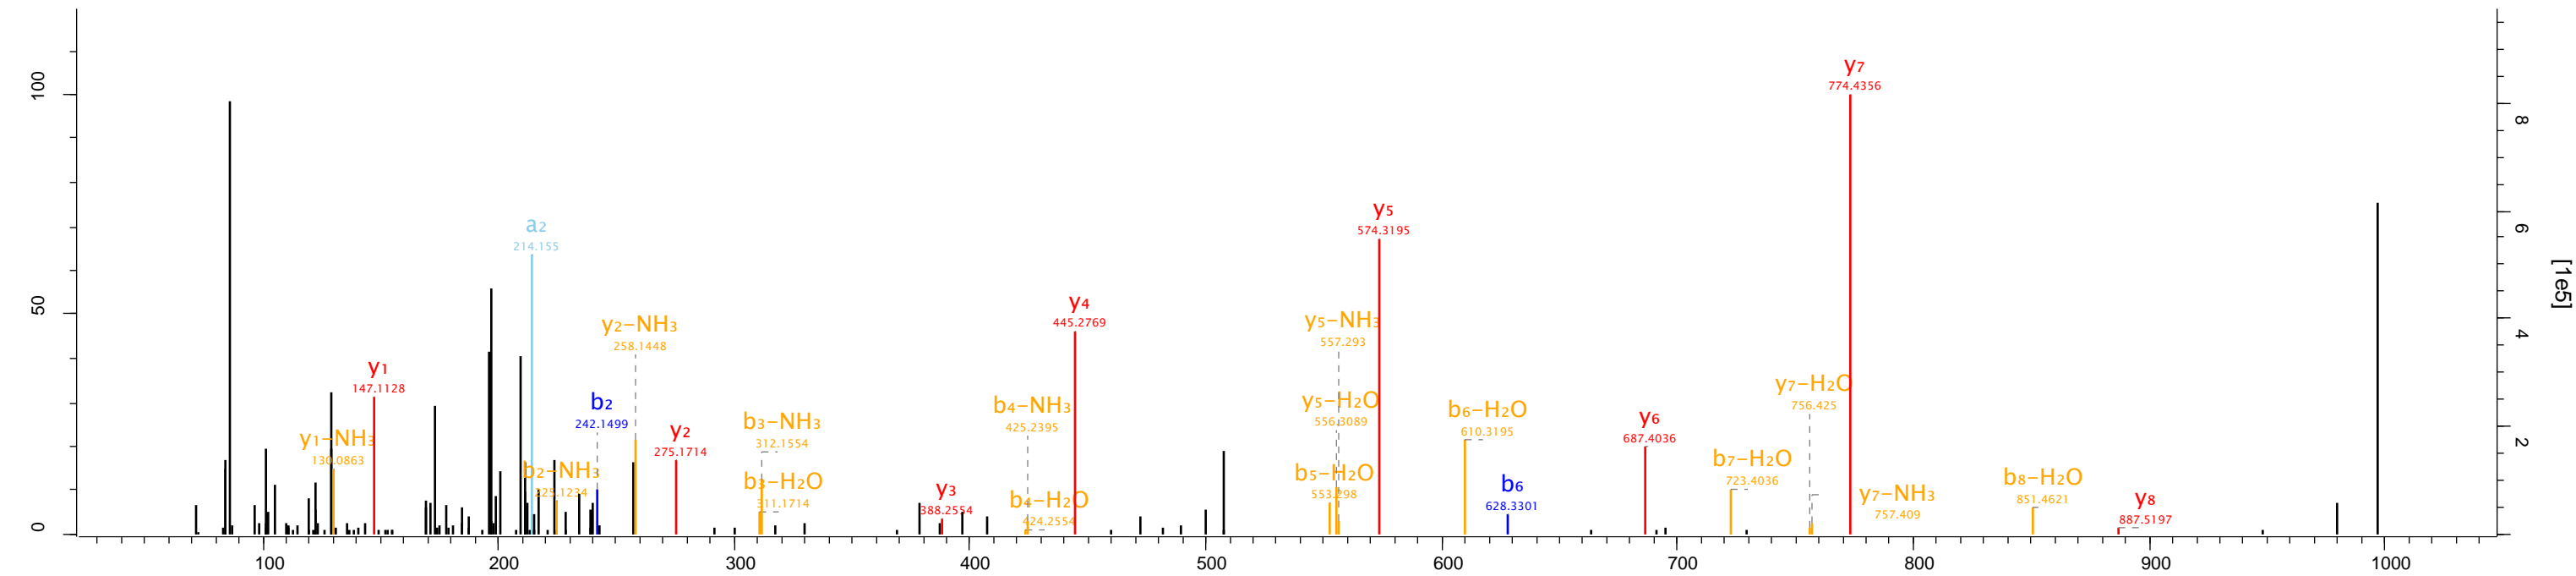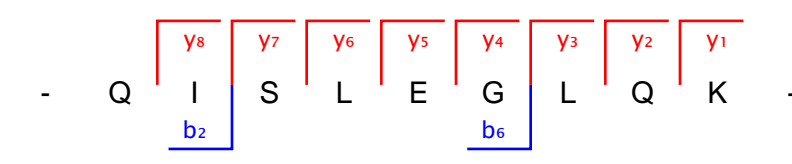

Supplement: supp_O115.049460_mcp.O115.049460-5.pdf [file supp_O115.049460_mcp.O115.049460-5.pdf]
