# Supplementary material for: A Double-Barrel Liquid Chromatography-Tandem Mass Spectrometry (LC-MS/MS) System to Quantify 96 Interactomes per Day
Source: PubMed Central journal article supplement (PMC4587330; doi:10.1074/mcp.o115.049460), 2015-04-17

| Raw file                      | Scan | Method    | Score  | m/z    | Gene names    |
|-------------------------------|------|-----------|--------|--------|---------------|
| 20140602_QEp4_FaHo_SA_ADA2_02 | 1754 | FTMS; HCD | 126.28 | 448.25 | RPL13B;RPL13A |

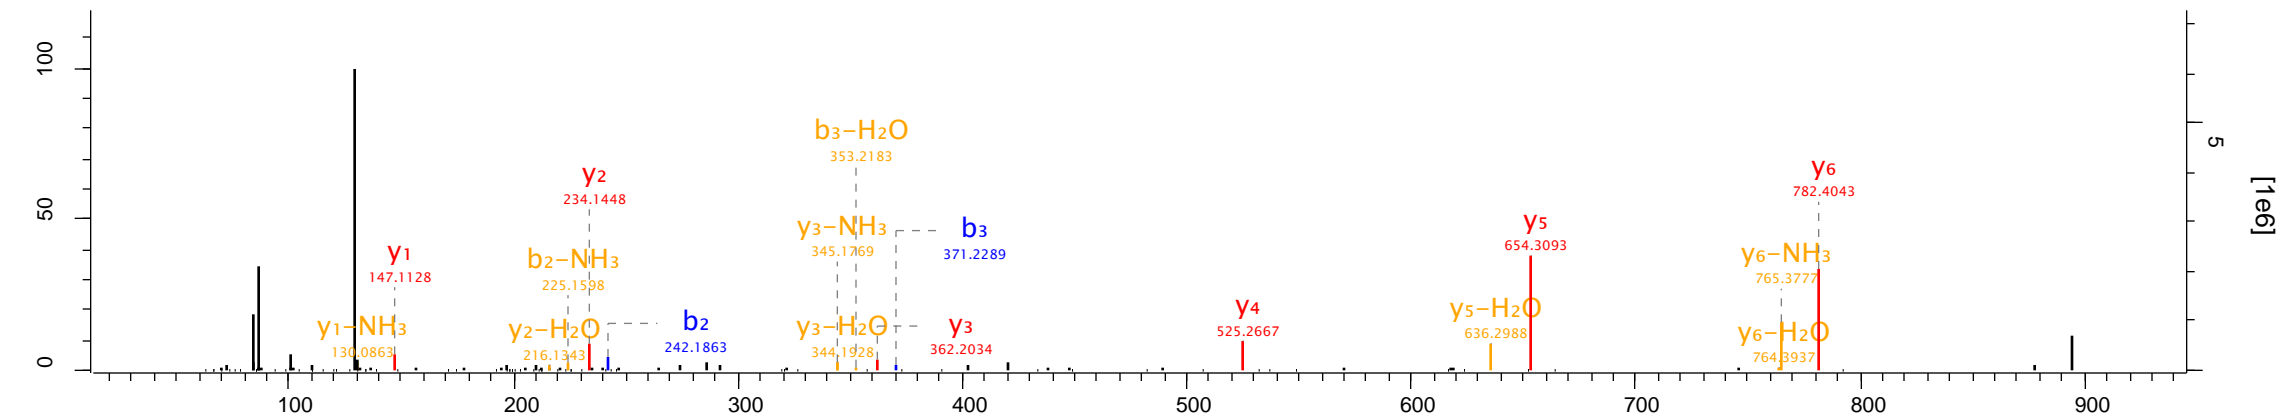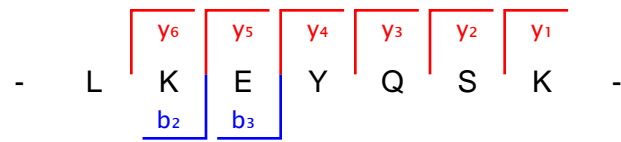

| Raw file                      | Scan | Method    | Score | m/z    | Gene names  |
|-------------------------------|------|-----------|-------|--------|-------------|
| 20140602_QEp4_FaHo_SA_ADA2_02 | 9841 | FTMS; HCD | 84.48 | 657.35 | RPL4B;RPL4A |

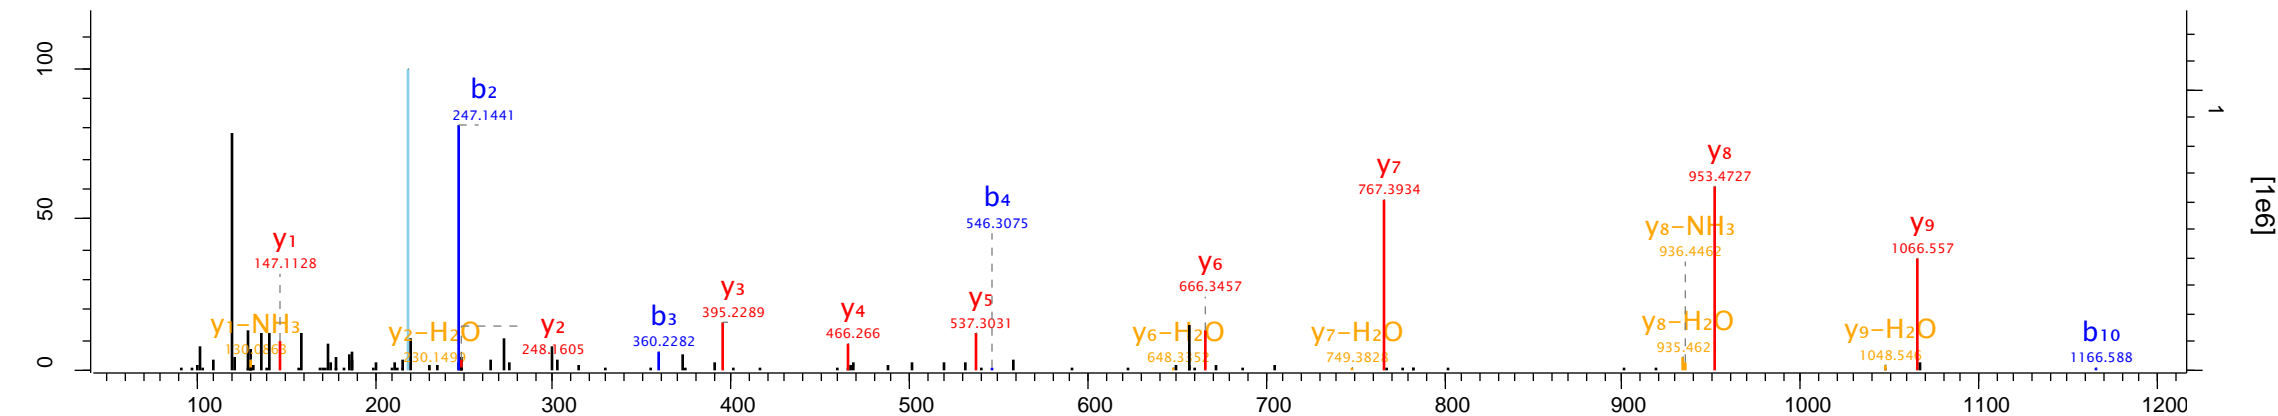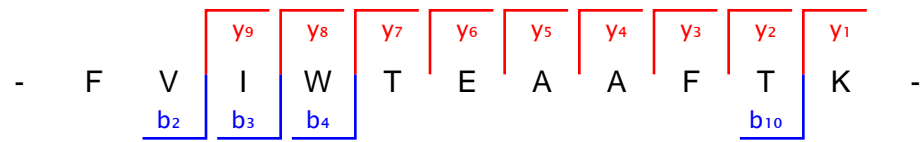

Raw file

Scan Method Score m/z Gene names

20140602\_QEp4\_FaHo\_SA\_BDF1\_01

9862 FTMS; HCD 0.19 729.63 CSL4

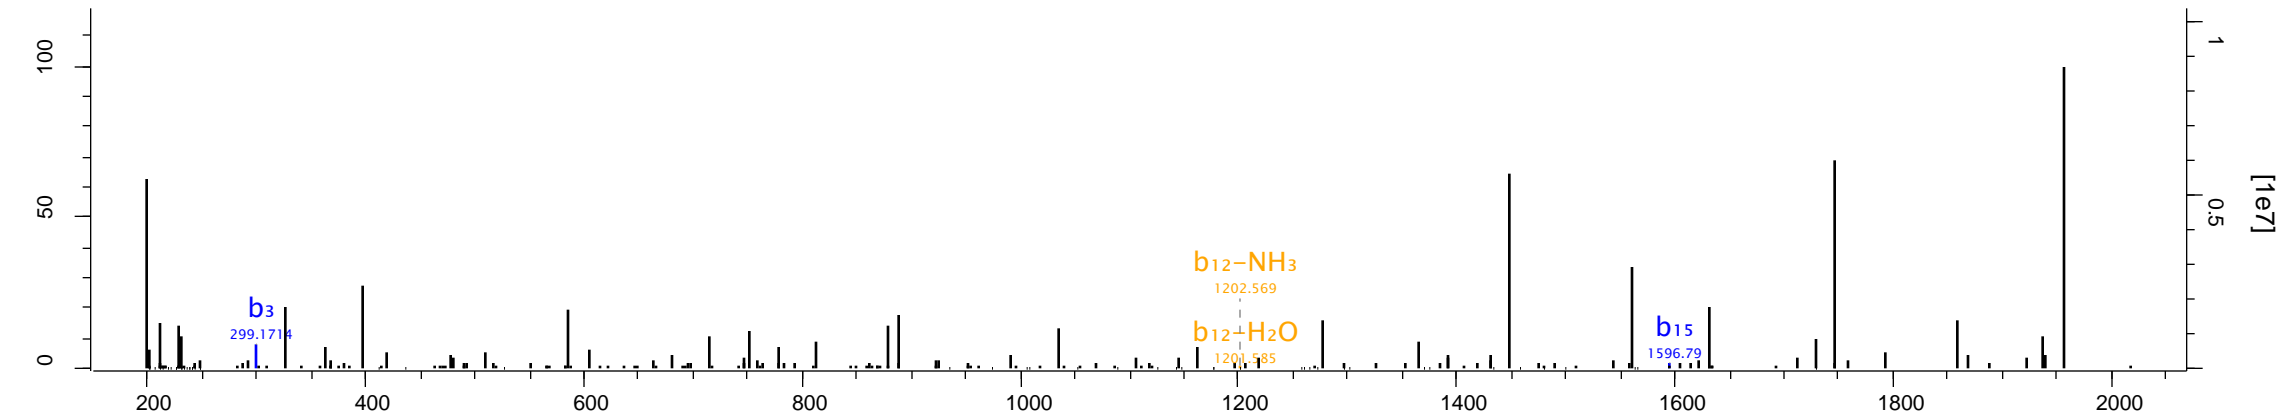

- A Q V L S L G D G T N Y Y L T T A R N D L G V V F A R -

$b_3$

$b_{15}$

Raw file Scan Method Score m/z Gene names

20140602\_QEp4\_FaHo\_SA\_BDF1\_02 8357 FTMS; HCD 48.22 637.67 EIS1

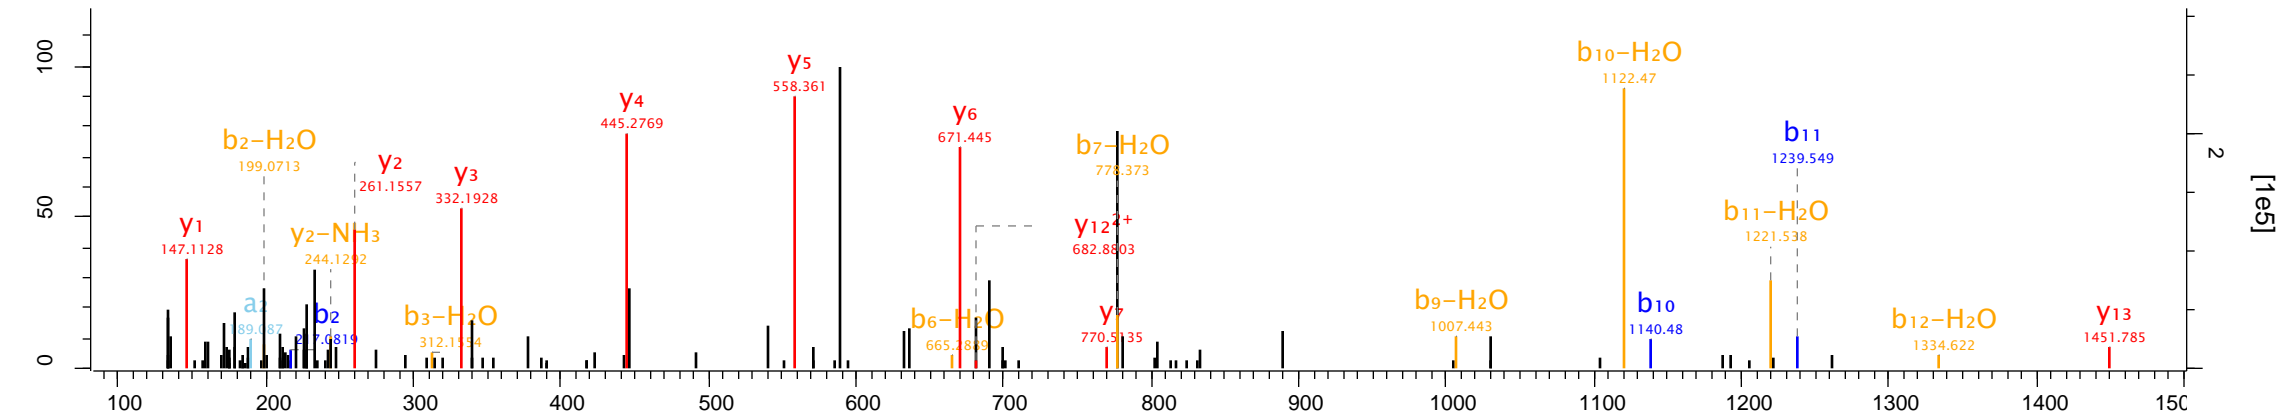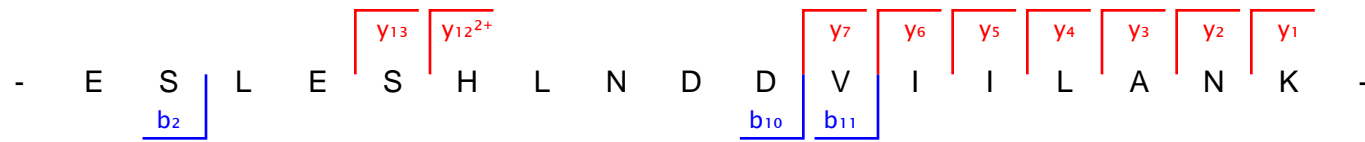

Raw file

Scar Method Score m/z Gene names

20140602\_QEp4\_FaHo\_SA\_99178\_1045\_178 FTMS; 178 1045.178 TY1B-ML1;TY1B-BR;TY1B-H;TY1B-MR2;TY1B-OR;TY1B-DR1;TY1B-NL2;TY1B-PR2;TY1B-DR5;TY1B-PR1;TY1B-JR2;TY1B-NL1;TY1B-OL;TY1B-LR4;TY1B-ML2;TY1B-DR3

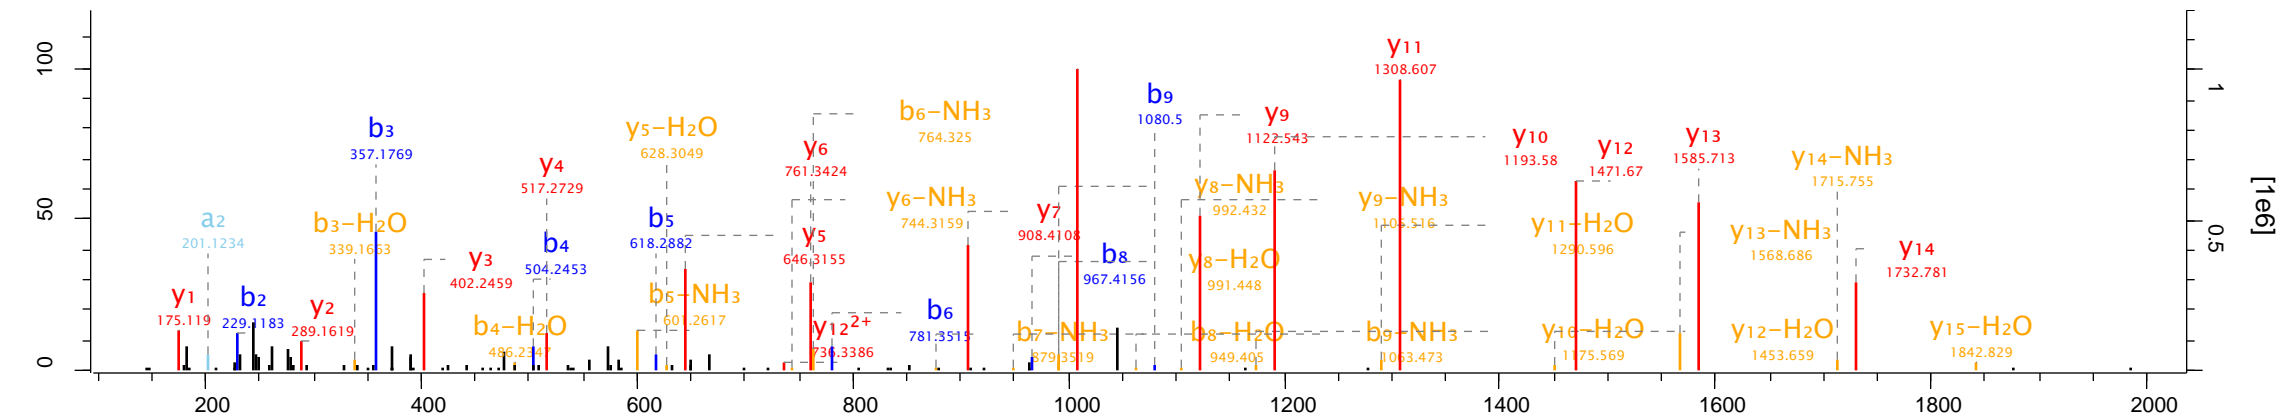

- L D Q F N Y D A L T F D E D L N R -

b<sub>2</sub> b<sub>3</sub> b<sub>4</sub> b<sub>5</sub> b<sub>6</sub> b<sub>8</sub> b<sub>9</sub>

y<sub>14</sub> y<sub>13</sub> y<sub>12</sub> y<sub>11</sub> y<sub>10</sub> y<sub>9</sub> y<sub>8</sub> y<sub>7</sub> y<sub>6</sub> y<sub>5</sub> y<sub>4</sub> y<sub>3</sub> y<sub>2</sub> y<sub>1</sub>

| Raw file                      | Scan | Method    | Score  | m/z    | Gene names |
|-------------------------------|------|-----------|--------|--------|------------|
| 20140602_QEp4_FaHo_SA_BDF2_01 | 5546 | FTMS; HCD | 151.29 | 421.77 | PRR1       |

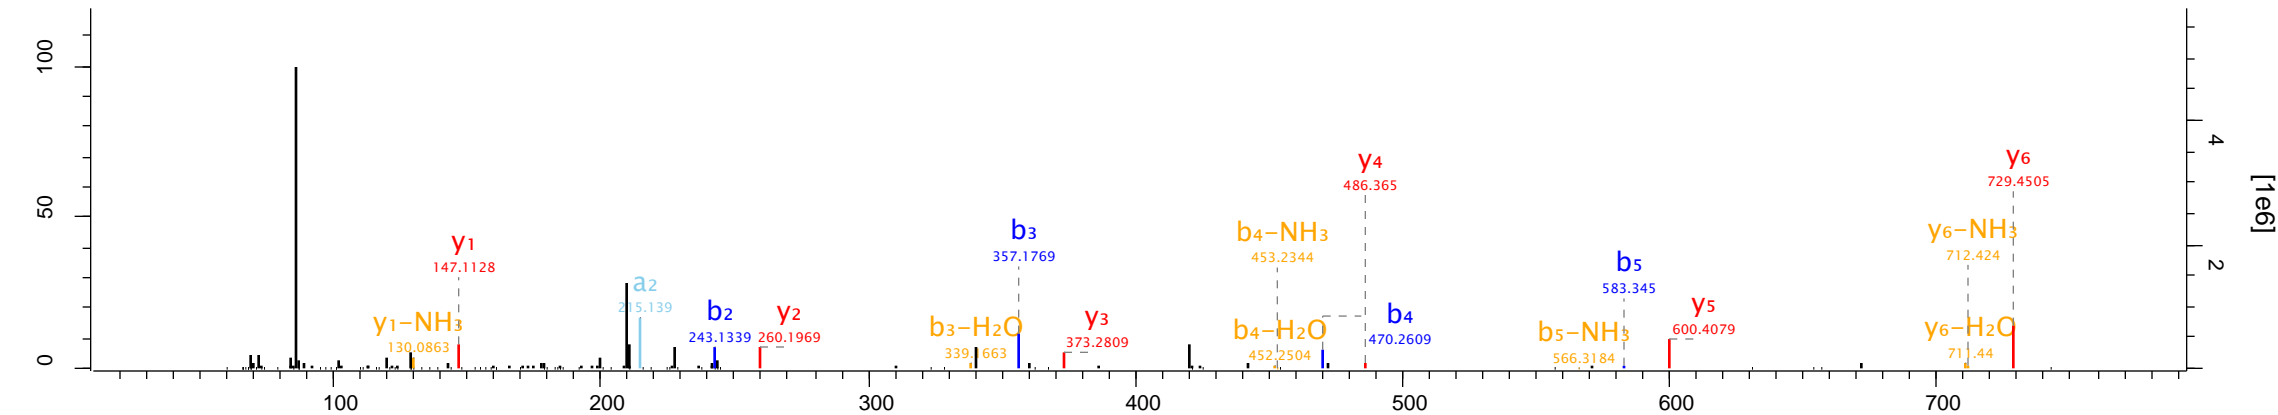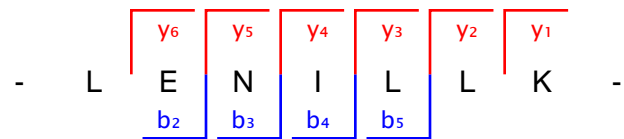

| Raw file                      | Scan | Method    | Score  | m/z    | Gene names |
|-------------------------------|------|-----------|--------|--------|------------|
| 20140602_QEp4_FaHo_SA_BDF2_01 | 8265 | FTMS; HCD | 127.02 | 700.89 | NOP12      |

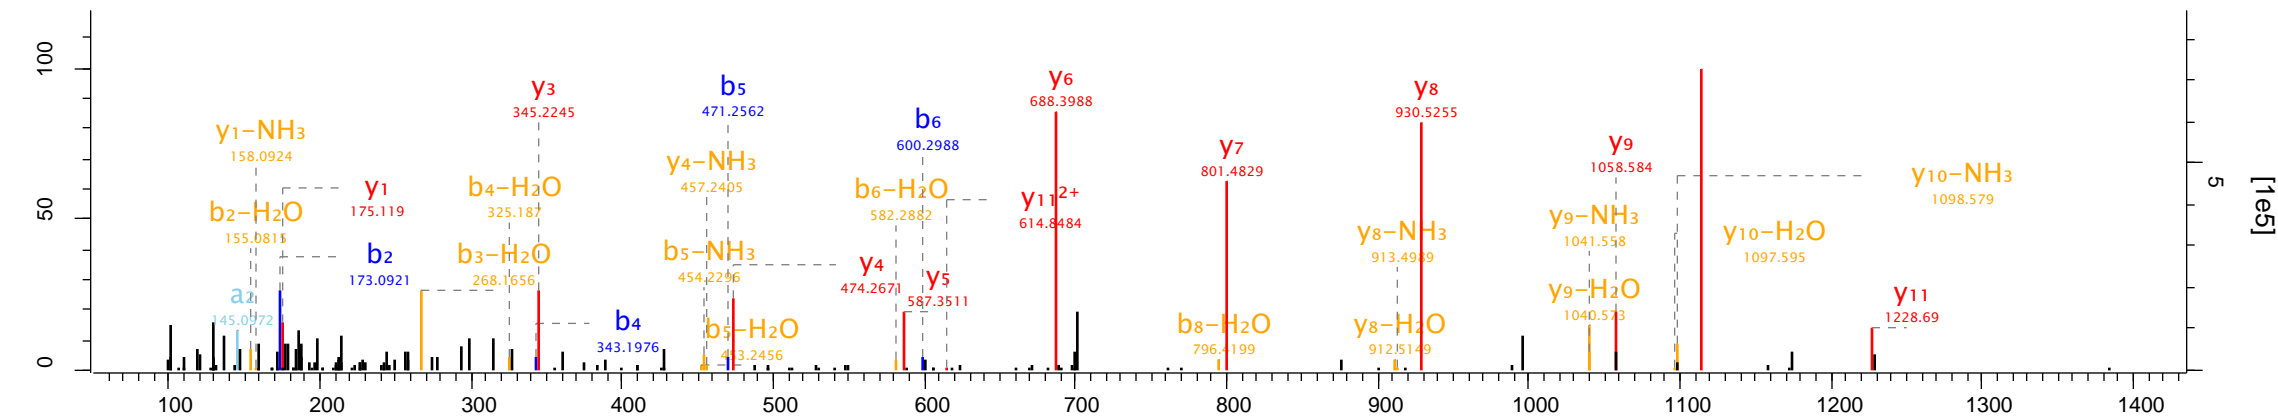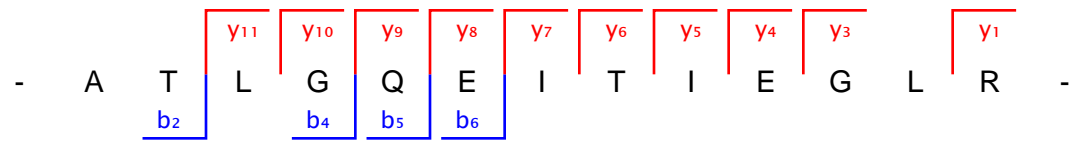

| Raw file                      | Scan | Method    | Score  | m/z    | Gene names  |
|-------------------------------|------|-----------|--------|--------|-------------|
| 20140602_QEp4_FaHo_SA_BDF2_02 | 4095 | FTMS; HCD | 178.94 | 480.76 | RPL9A;RPL9B |

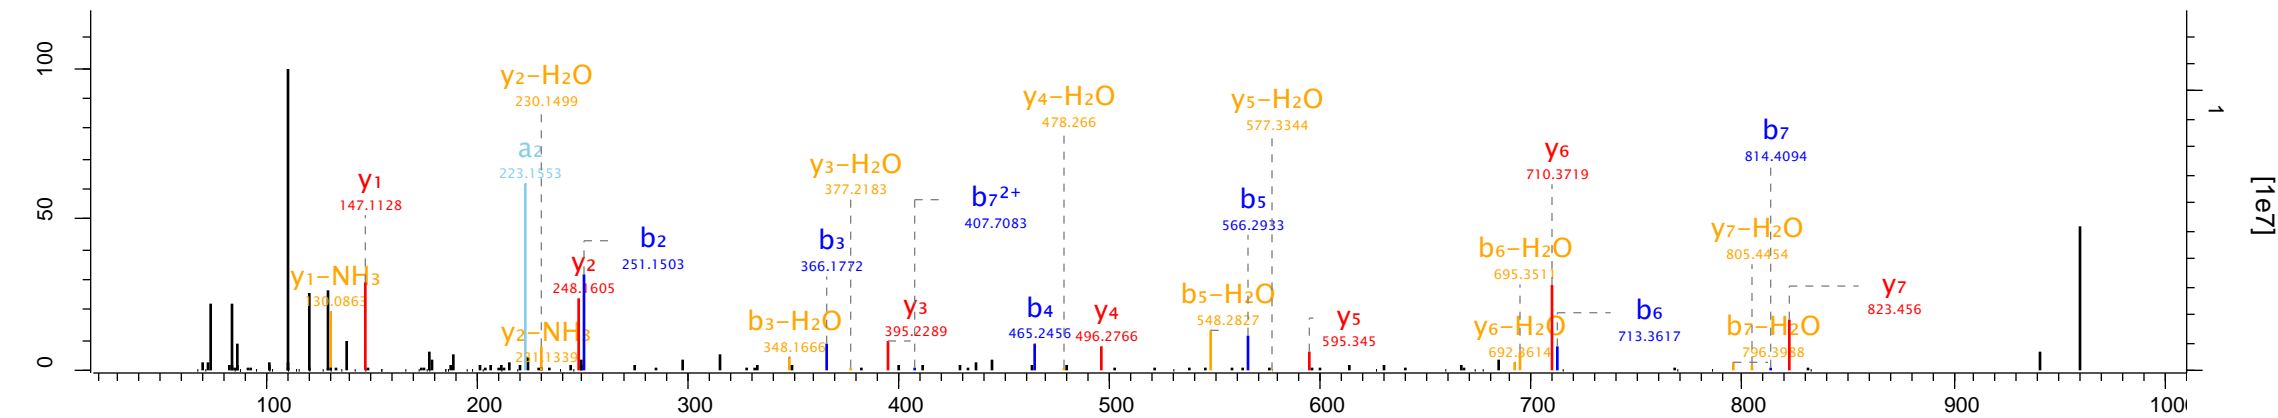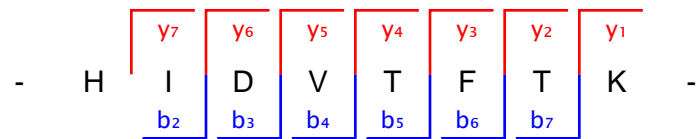



Raw file

Scan Method Score m/z Gene names

20140602\_QEp4\_FaHo\_SA\_BDF2\_02

8104 FTMS; HCD 144.29 548.29 RPA135

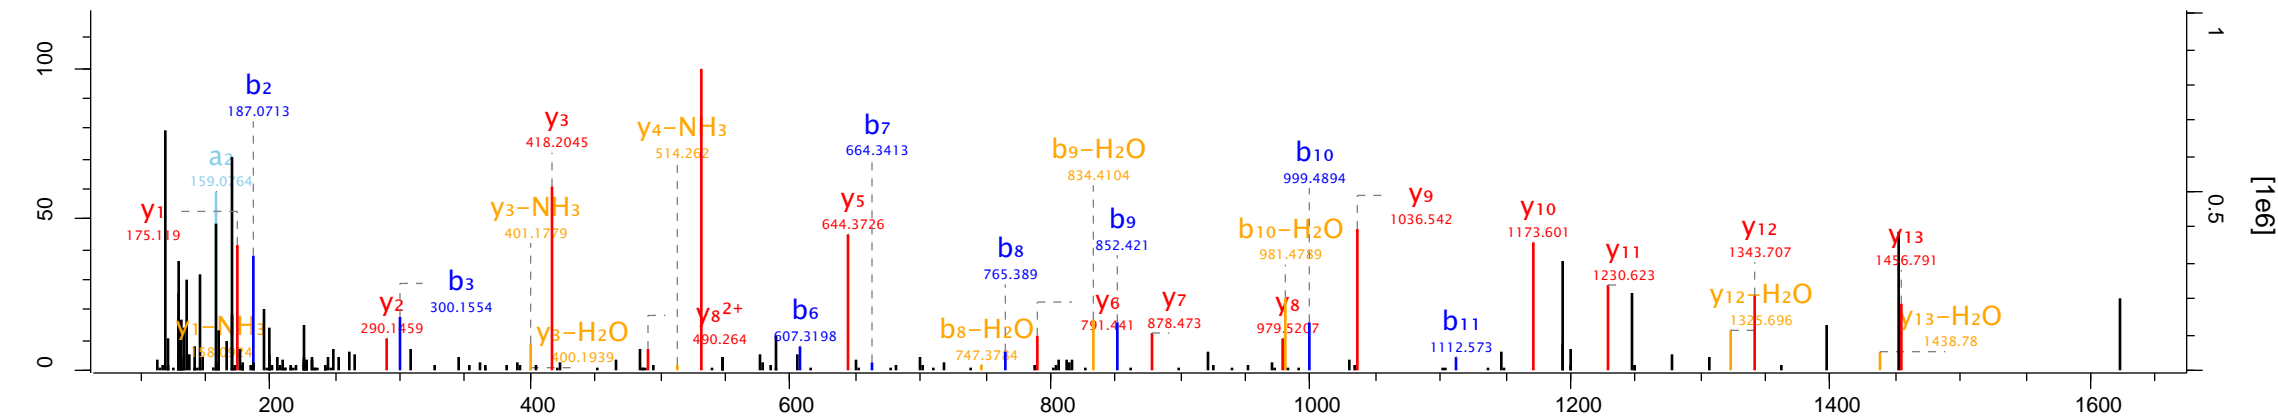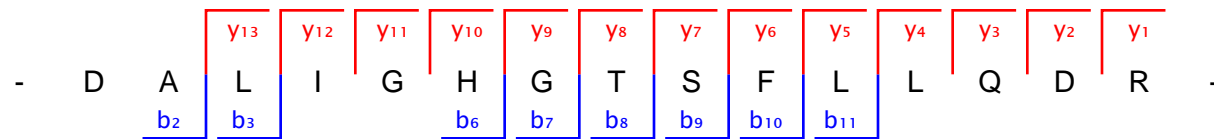

| Raw file                      | Scan | Method    | Score  | m/z    | Gene names |
|-------------------------------|------|-----------|--------|--------|------------|
| 20140602_QEp4_FaHo_SA_BDF2_02 | 8499 | FTMS; HCD | 109.44 | 544.79 | KTR3       |

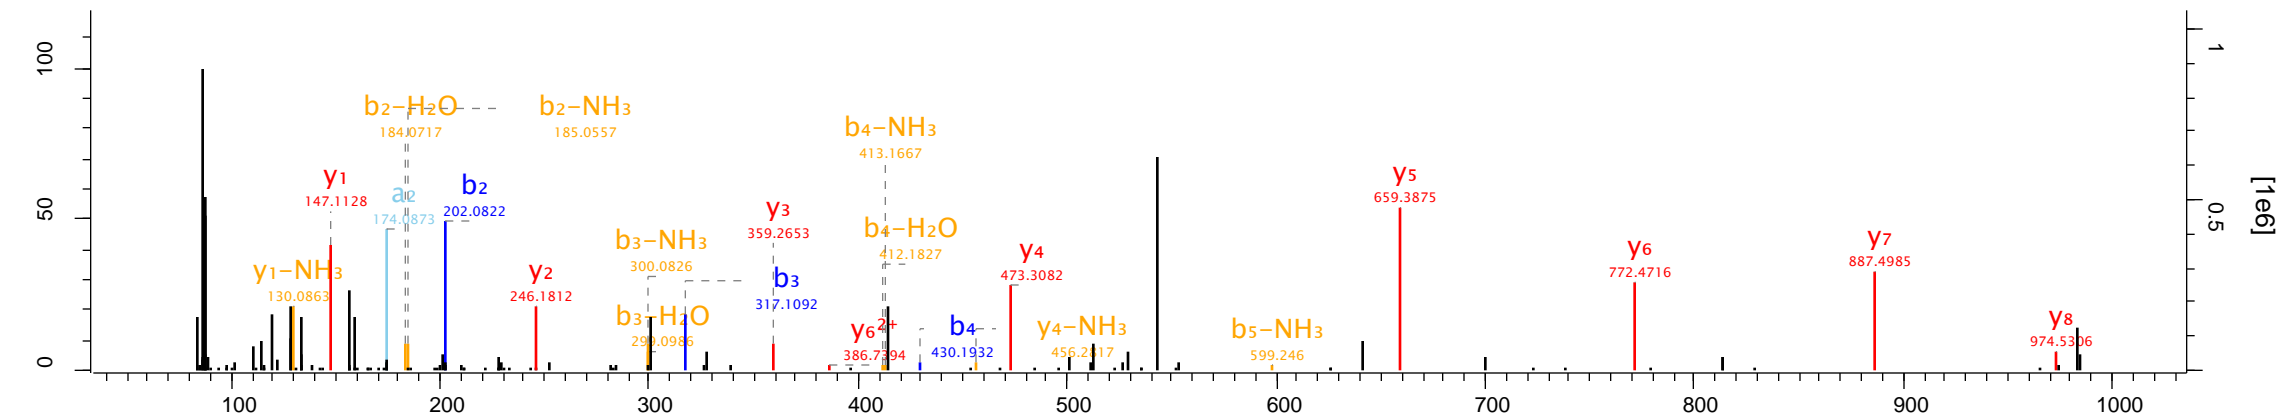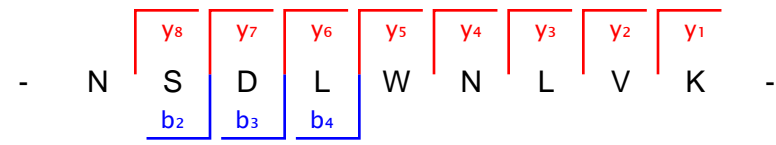

Raw file Scan Method Score m/z Gene names

20140602\_QEp4\_FaHo\_SA\_BDF2\_02 9741 FTMS; HCD 124.99 696.36 LRO1

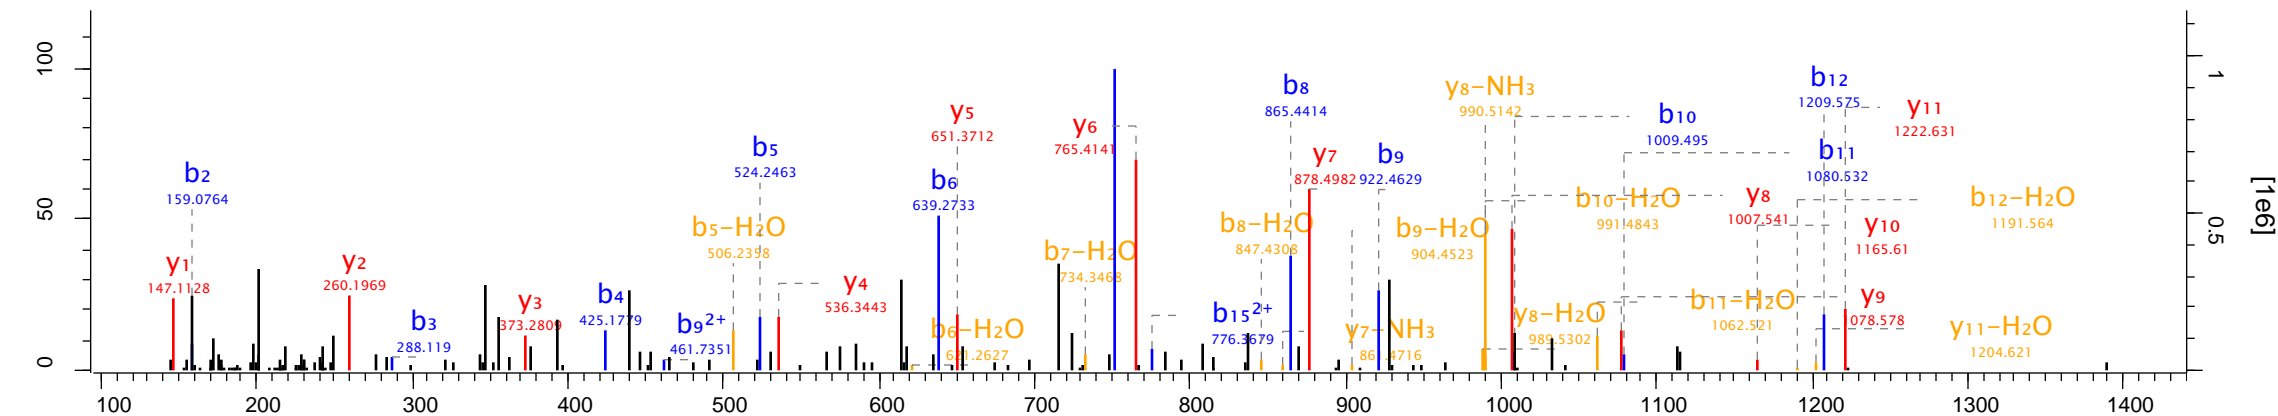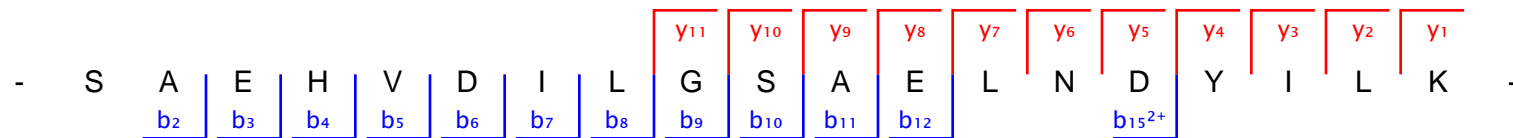

| Raw file                      | Scan | Method    | Score | m/z    | Gene names    |
|-------------------------------|------|-----------|-------|--------|---------------|
| 20140602_QEp4_FaHo_SA_BDF2_03 | 6289 | FTMS; HCD | 84.5  | 433.25 | RPL13B;RPL13A |

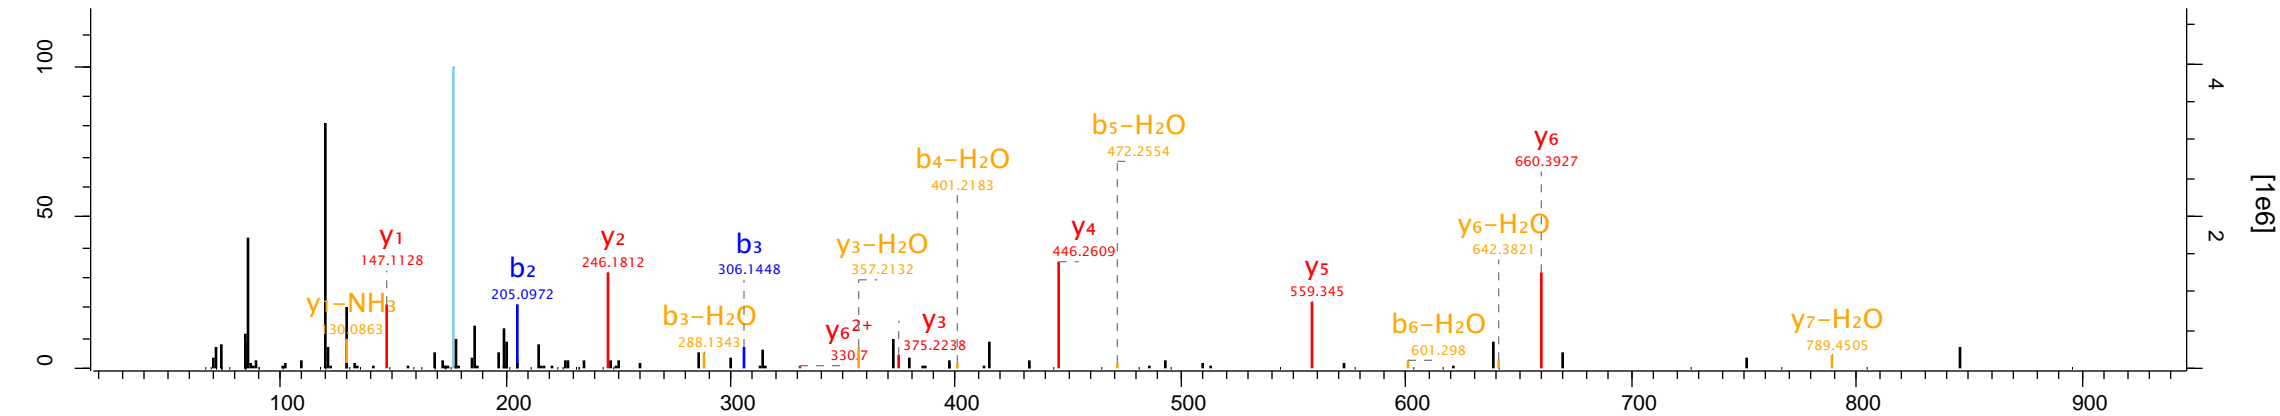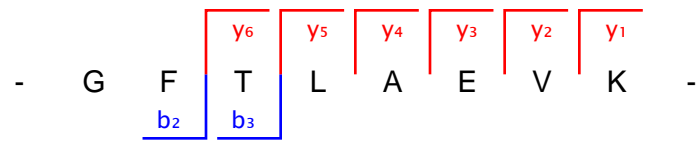

Raw file 20140602\_QEp4\_FaHo\_SA\_BDF2\_03 Scan 9040 Method FTMS; HCD Score 228.15 m/z 862.44 Gene names RPS14B;RPS14A

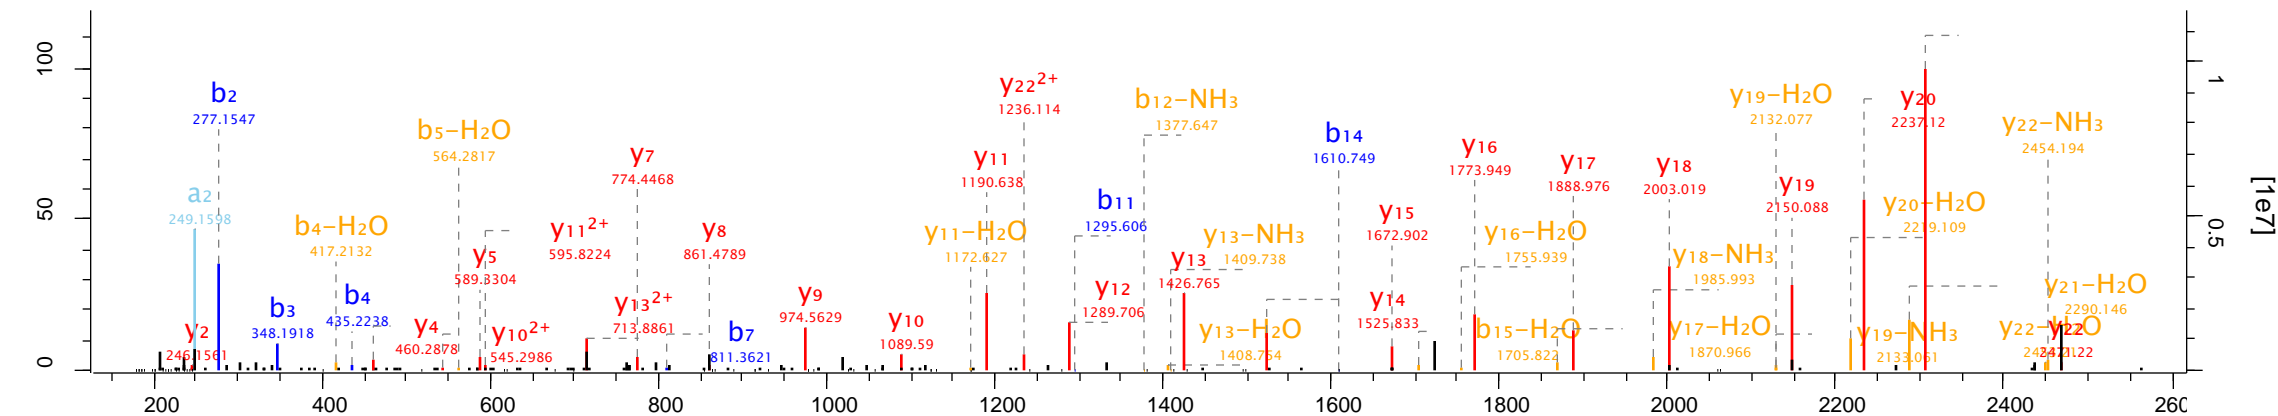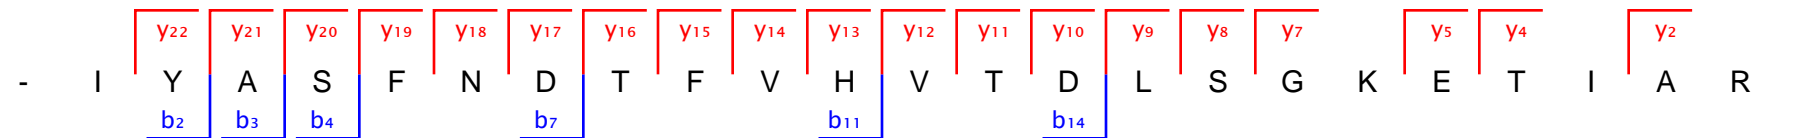

| Raw file                      | Scan | Method    | Score | m/z    | Gene names    |
|-------------------------------|------|-----------|-------|--------|---------------|
| 20140602_QEp4_FaHo_SA_CT16_01 | 4213 | FTMS; HCD | 68.58 | 468.26 | RPS14B;RPS14A |

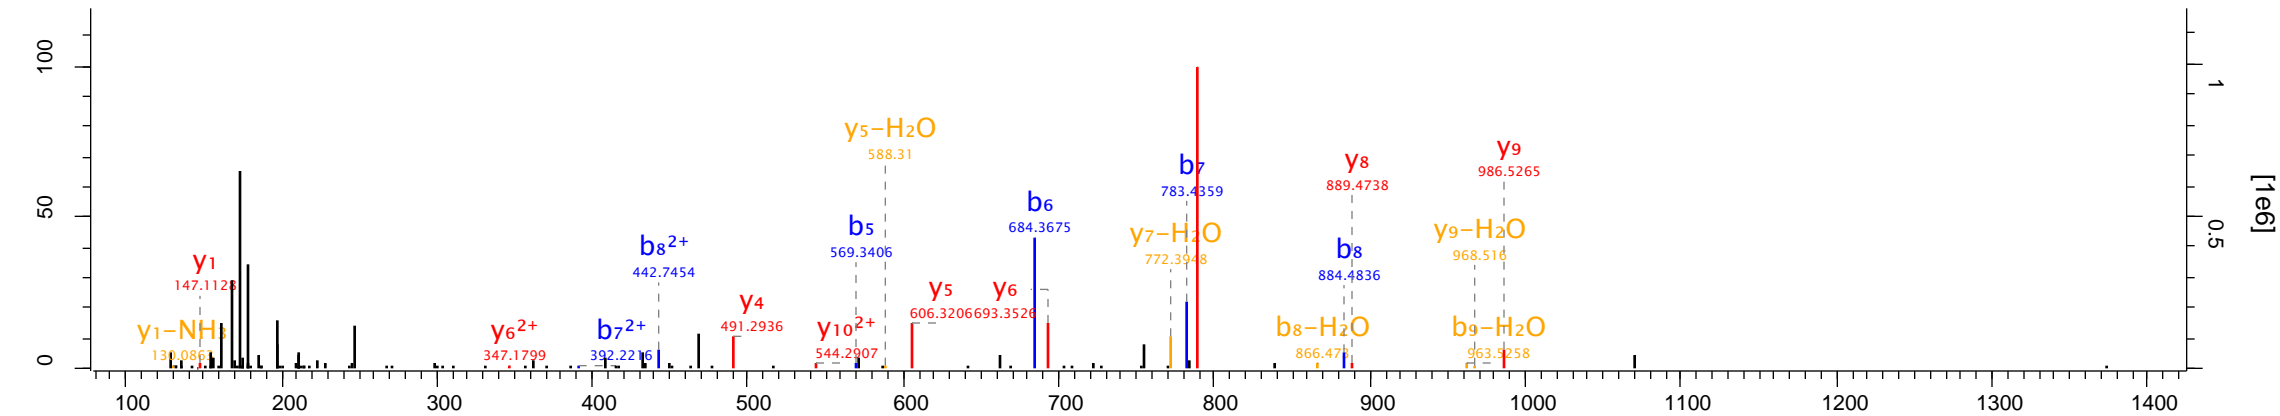

- I G R I E D V T P V P S D S T R K -

Fragmentation mapping (b and y ions):

- b<sub>5</sub> (E), b<sub>6</sub> (D), b<sub>7</sub> (V), b<sub>8</sub> (T)
- y<sub>10</sub><sup>2+</sup> (T), y<sub>9</sub> (P), y<sub>8</sub> (V), y<sub>7</sub> (P), y<sub>6</sub> (S), y<sub>5</sub> (D), y<sub>4</sub> (S), y<sub>1</sub> (K)

| Raw file                      | Scan | Method    | Score  | m/z    | Gene names  |
|-------------------------------|------|-----------|--------|--------|-------------|
| 20140602_QEp4_FaHo_SA_CT16_01 | 5974 | FTMS; HCD | 113.44 | 589.82 | RPL9A;RPL9B |

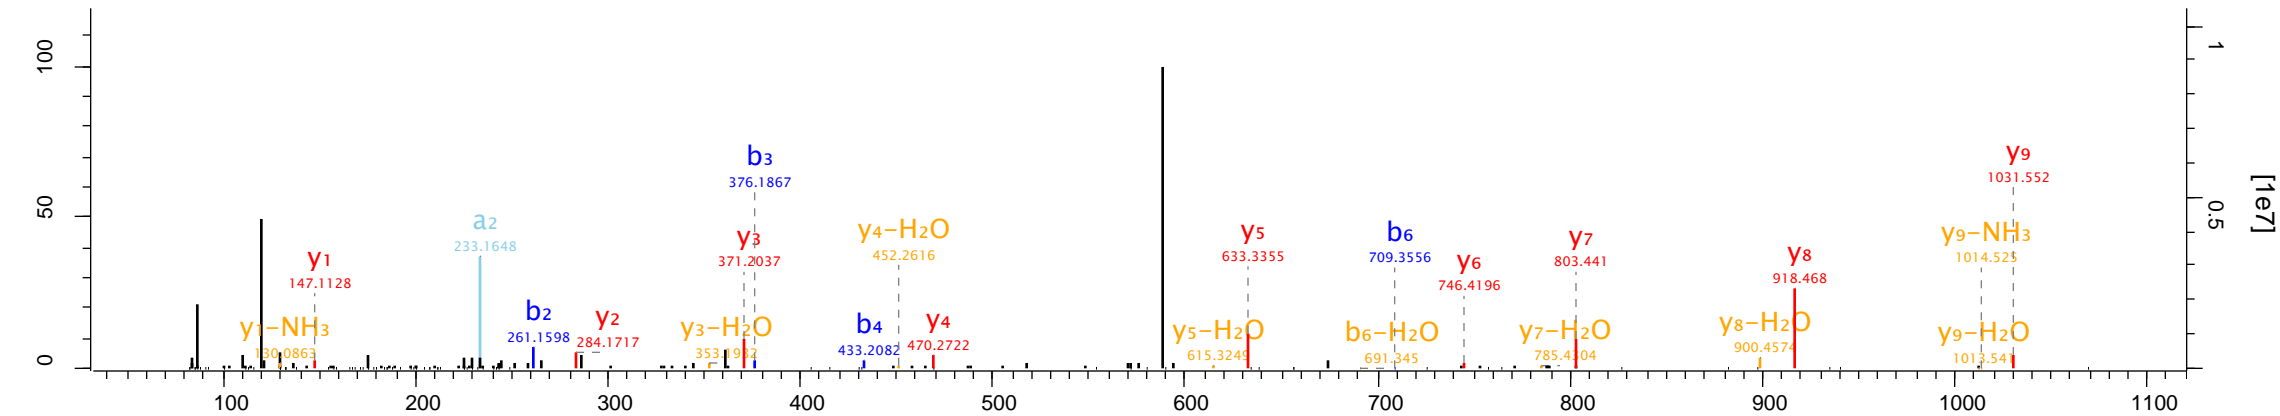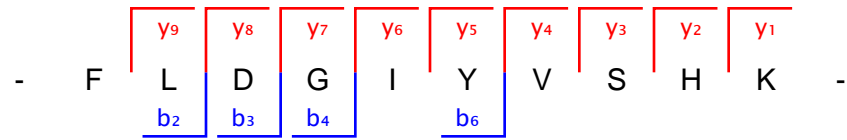

Raw file Scan Method Score m/z Gene names  
 20140602\_QEp4\_FaHo\_SA\_CT16\_01 8912 FTMS; HCD 138.75 688.03 ERG11

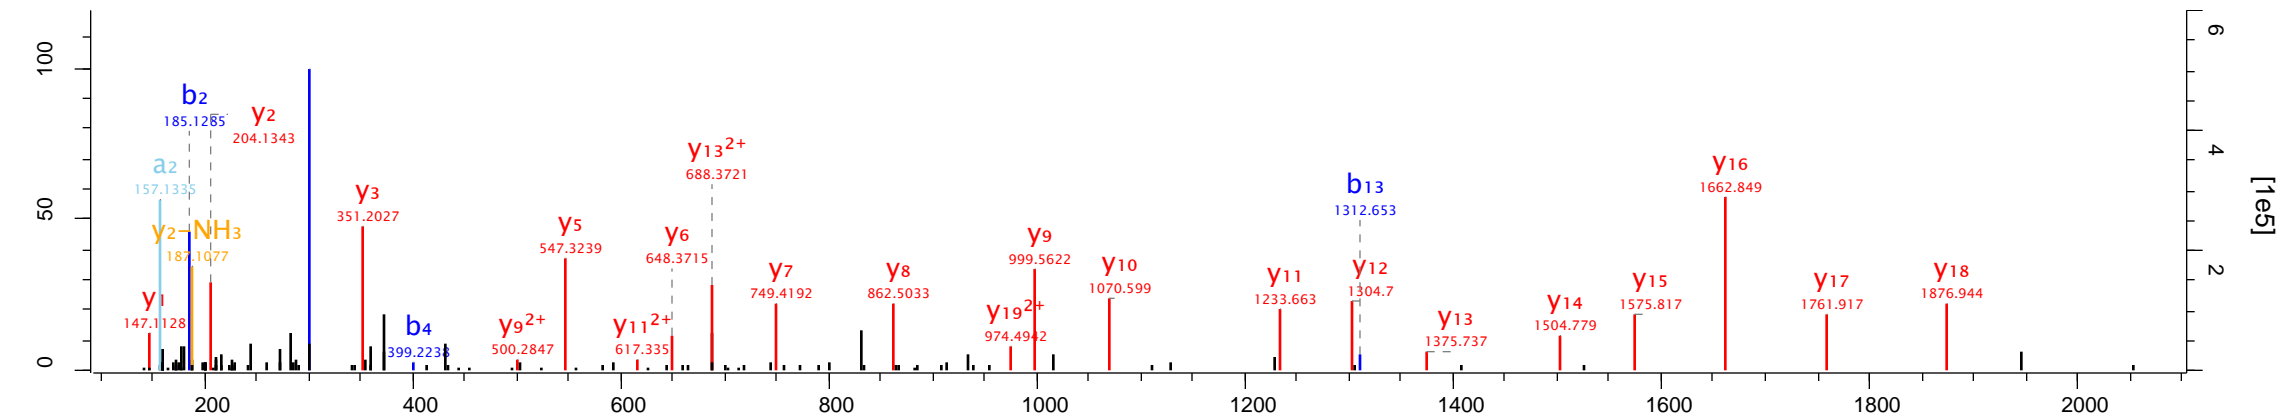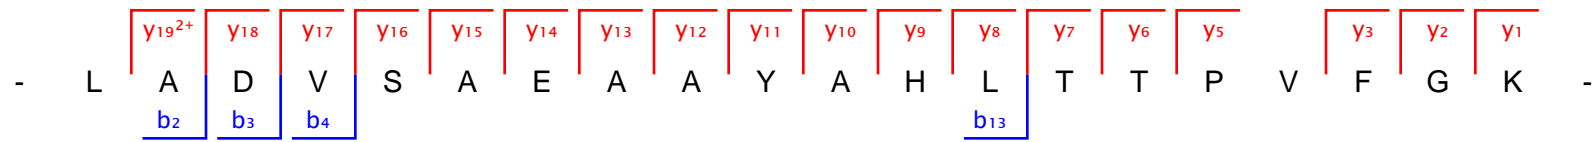





Raw file Scan Method Score m/z Gene names

20140602\_QEp4\_FaHo\_SA\_CT16\_03 3966 FTMS; HCD 76.36 538.94 FLC3

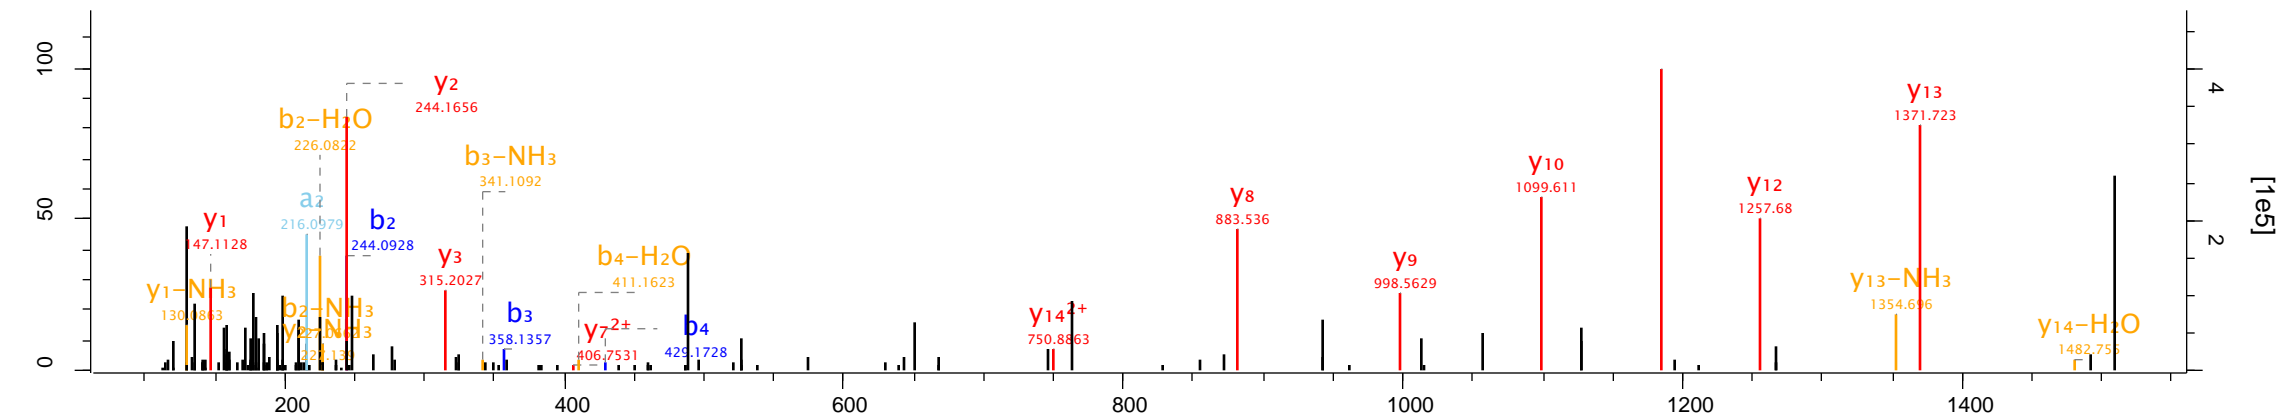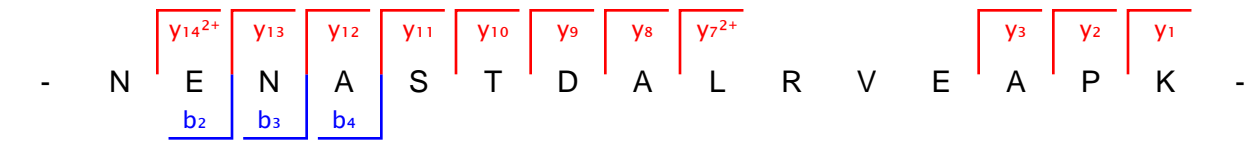

Raw file Scan Method Score m/z Gene names

20140602\_QEp4\_FaHo\_SA\_CT16\_03 5196 FTMS; HCD 66.99 475.59 NOP13

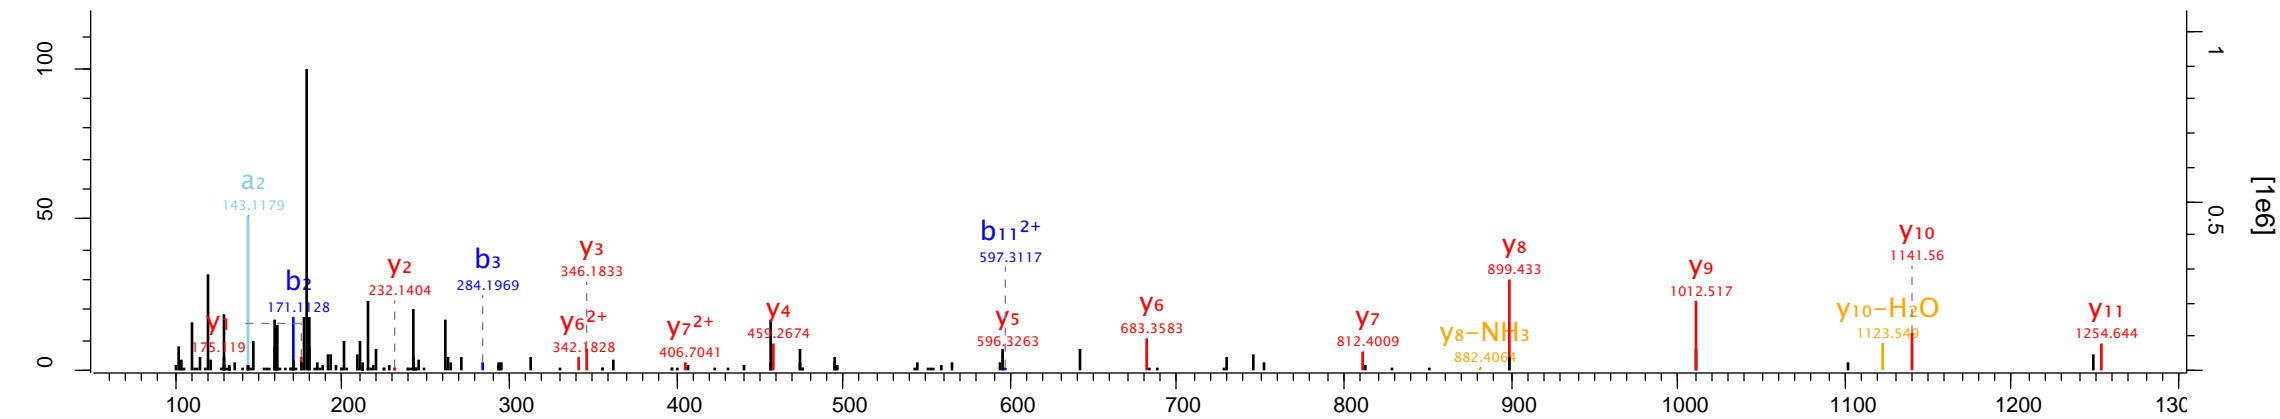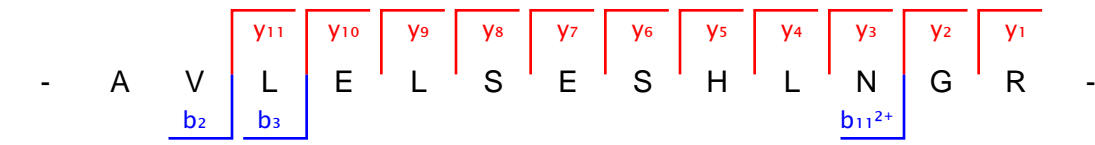

Raw file Scan Method Score m/z Gene names

20140602\_QEp4\_FaHo\_SA\_CT16\_03 9108 FTMS; HCD 91.62 623.36 PUF6

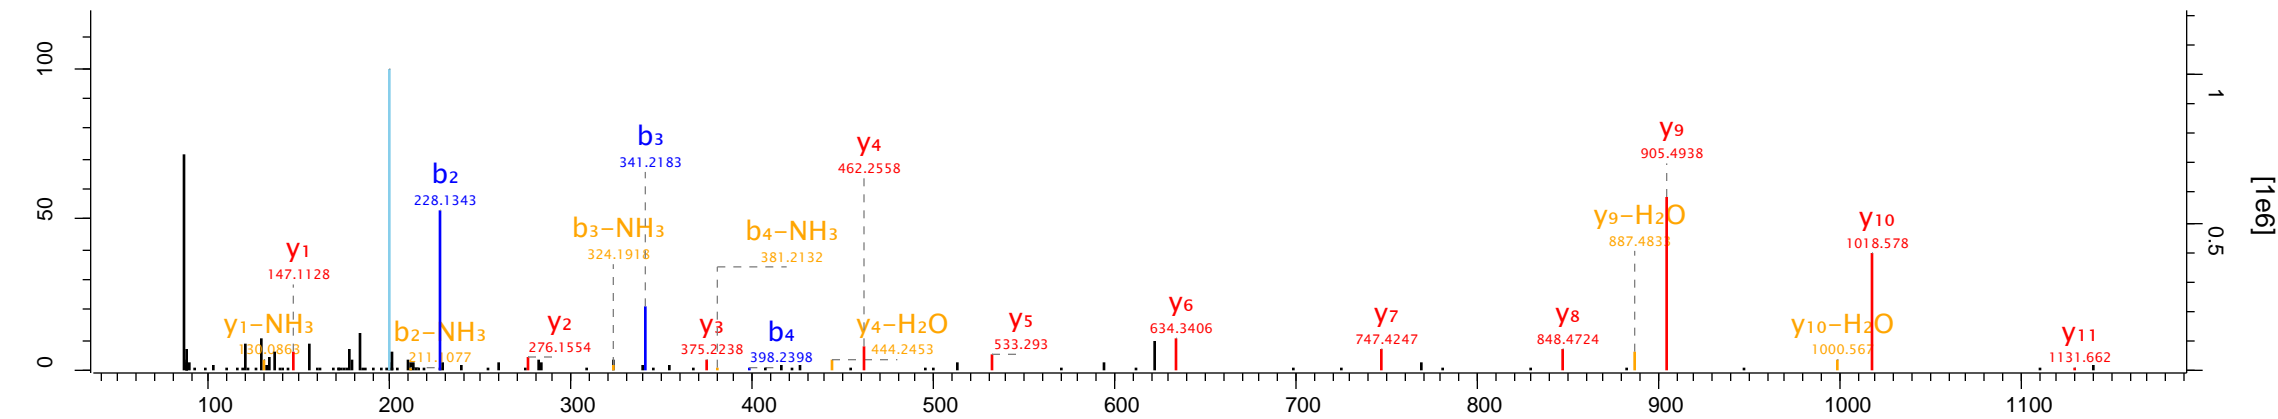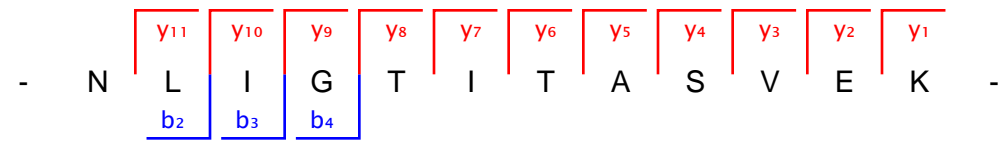

| Raw file                      | Scan | Method    | Score  | m/z    | Gene names |
|-------------------------------|------|-----------|--------|--------|------------|
| 20140602_QEp4_FaHo_SA_EAF3_01 | 3197 | FTMS; HCD | 138.85 | 415.25 | TY1B-OL    |

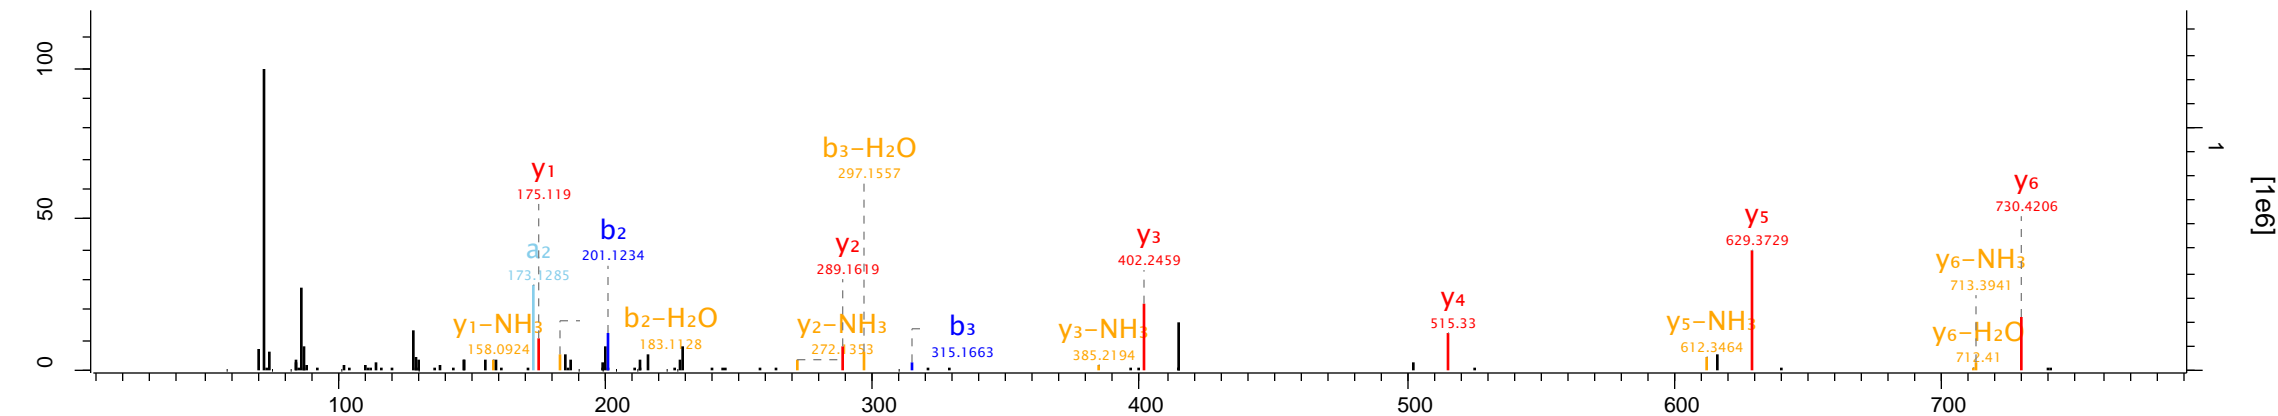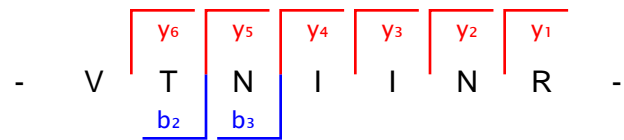

Raw file Scan Method Score m/z Gene names

20140602\_QEp4\_FaHo\_SA\_E 53931 FTMS; 53.56 590.9 TY1B-ML1;TY1B-BR;TY1B-H;TY1B-MR2;TY1B-OR;TY1B-DR1;TY1B-PR2;TY1B-DR5;TY1B-PR1;TY1B-JR2;TY1B-OL;TY1B-LR4;TY1B-ML2;TY1B-DR3;TY1B-PR3;TY1B-P

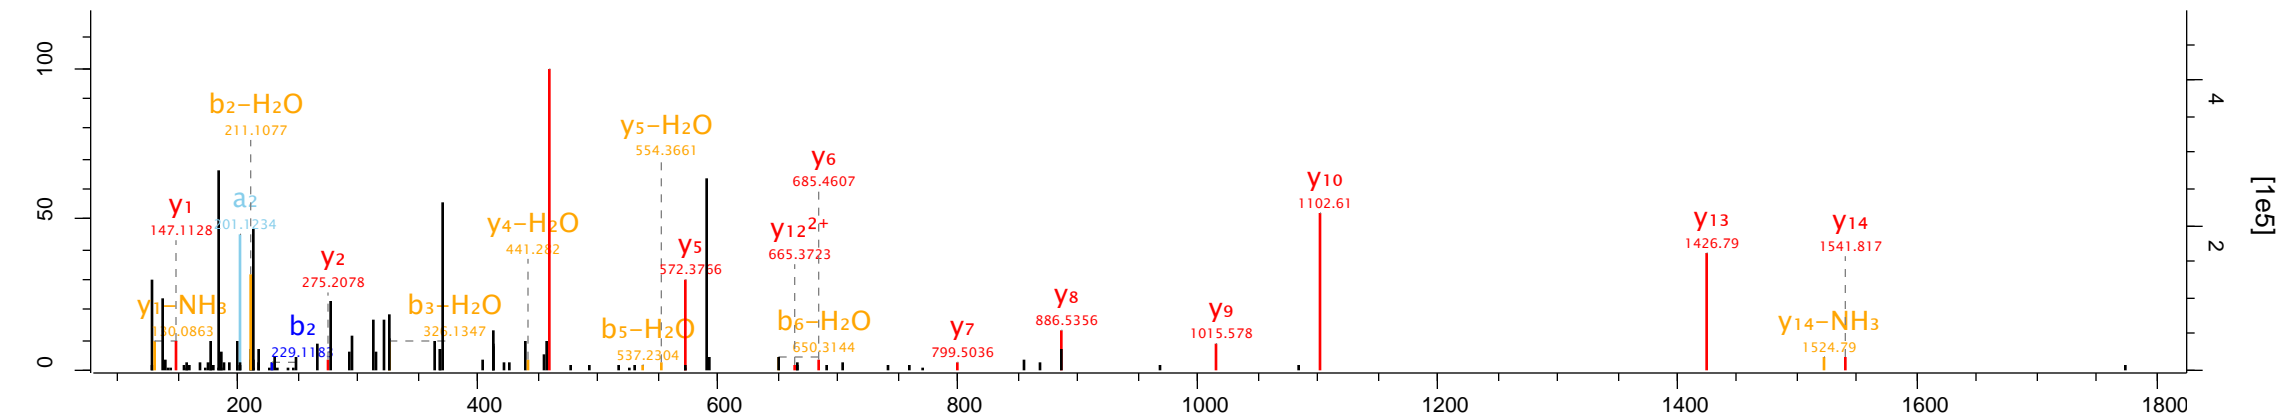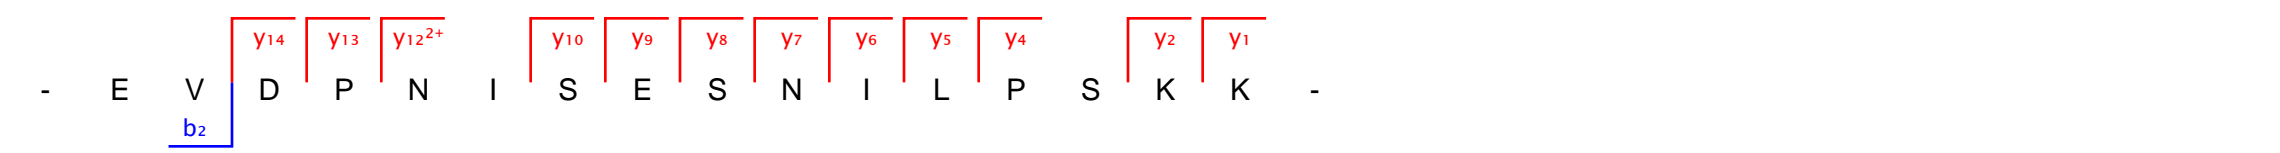

20140602\_QEp4\_FaHo\_S235\_FTMS; 411.1038.TY1B-ML1;TY1B-BR;TY1A-PR1;TY1A-A;TY1A-DR4;TY1B-H;TY1B-MR2;TY1B-OR;TY1B-DR1;TY1B-NL2;TY1B-PR2;TY1B-DR5;TY1B-PR1;TY1B-JR2;TY1A-PL;TY1A-LR2;TY1A

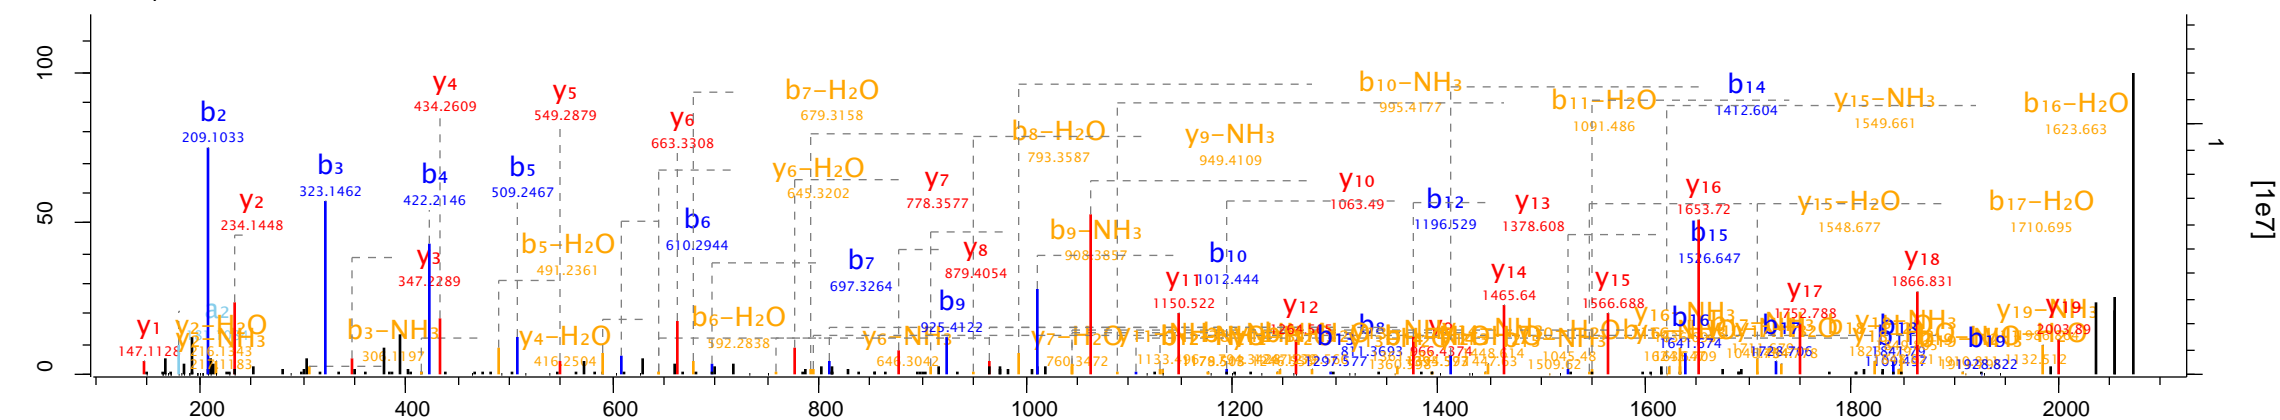

-

A

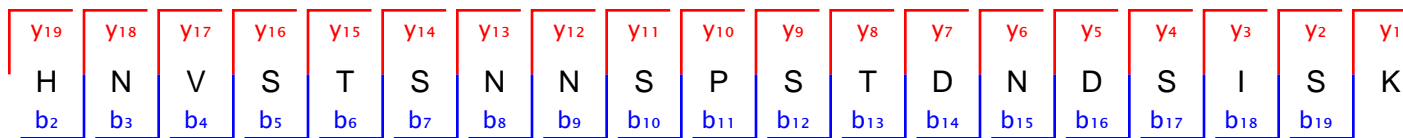

20140602\_QEp4\_FaHo\_SA\_260:FTMS; 55.6 308.4 TY1B-ML1;TY1B-BR;TY1B-OR;TY1B-DR1;TY1B-NL2;TY1B-PR2;TY1B-DR5;TY1B-PR1;TY1B-JR2;TY1B-NL1;TY1B-OL;TY1B-LR4;TY1B-ML2;TY1B-DR3;TY1B-PR3;TY1B-PL;

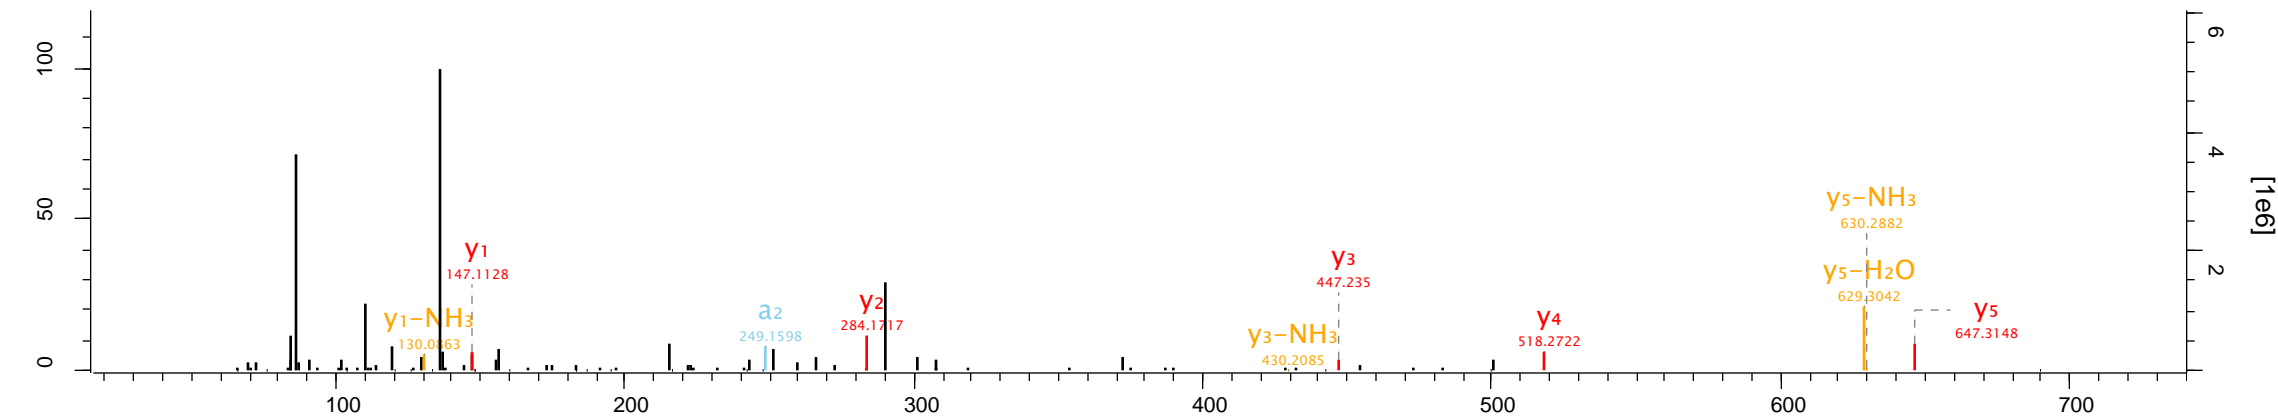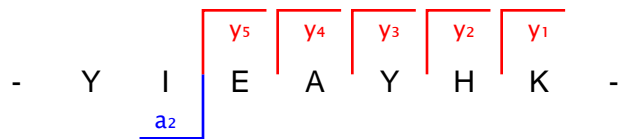



Raw file

Scan

Method

Score

m/z

Gene names

20140602\_QEp4\_FaHo\_SA\_EAF3\_02

3519

FTMS; HCD

115.7

403.54

TY1A-PL;TY1A-LR2;TY1A-ER1;TY1A-DR6;TY1A-DR2

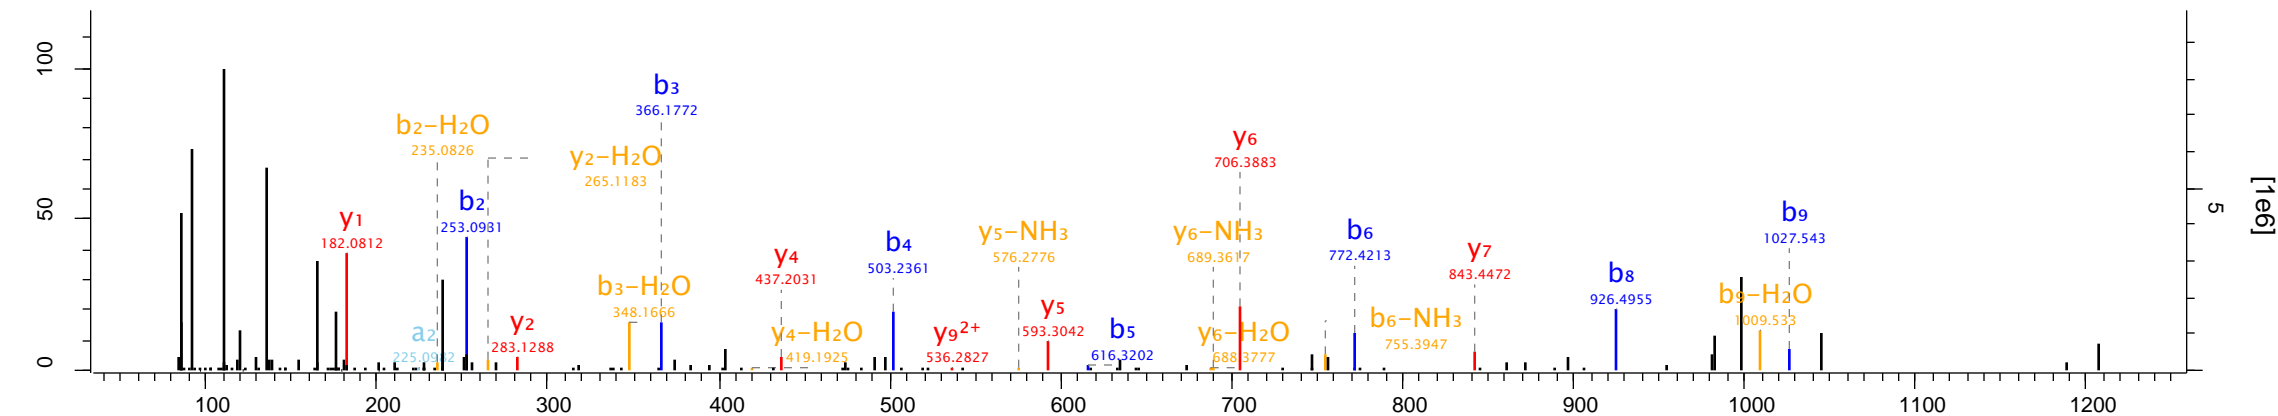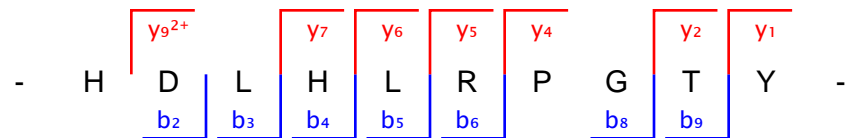

20140602\_QEp4\_FaHo\_SA\_EAF3\_0 3637 FTMS; HCD 110.74 645.3 TY1B-ML1;TY1B-MR2;TY1B-OR;TY1B-DR1;TY1B-PR2;TY1B-DR5;TY1B-PR1;TY1B-JR2;TY1B-OL;TY1B-LR4;TY1B-ML2;TY1B-PR3;TY1B-PL;TY1B-LR2;TY1B-

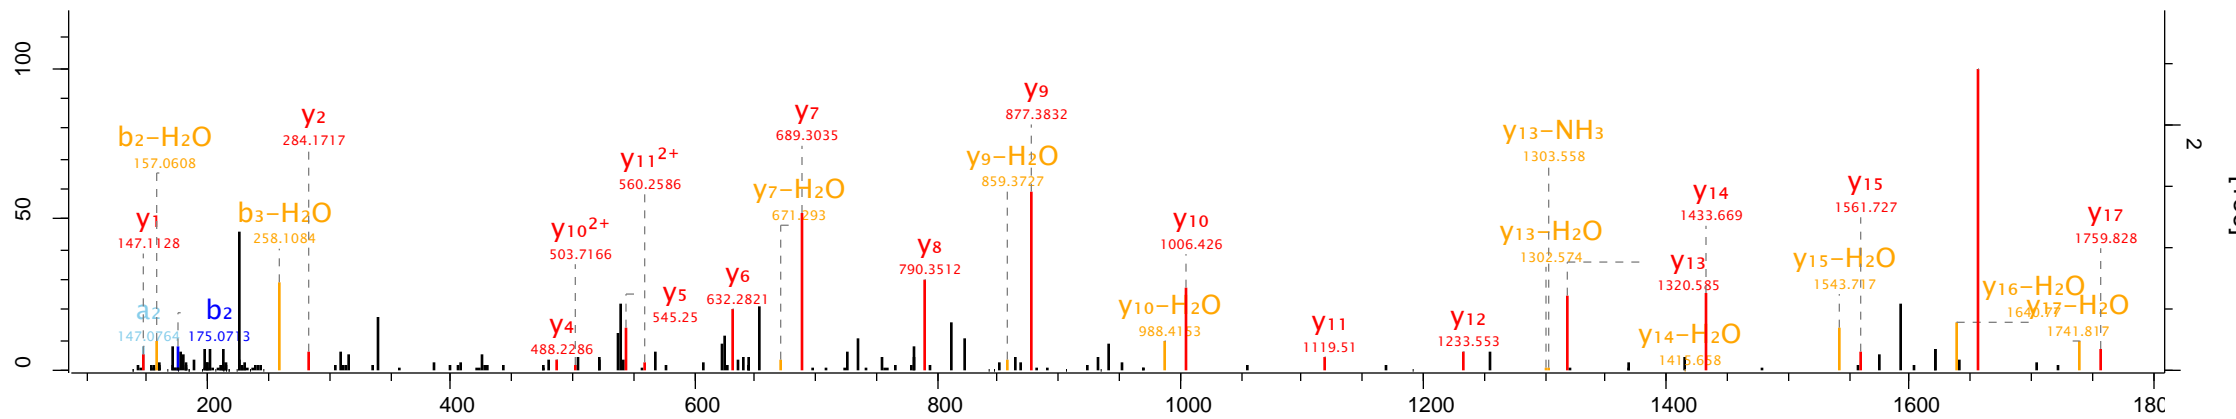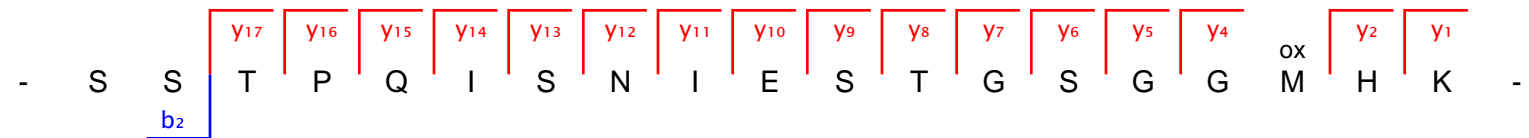

| Raw file                      | Scan | Method    | Score | m/z    | Gene names               |
|-------------------------------|------|-----------|-------|--------|--------------------------|
| 20140602_QEp4_FaHo_SA_EAF3_02 | 3709 | FTMS; HCD | 97.81 | 427.55 | TY1A-PR1;TY1A-A;TY1A-DR4 |

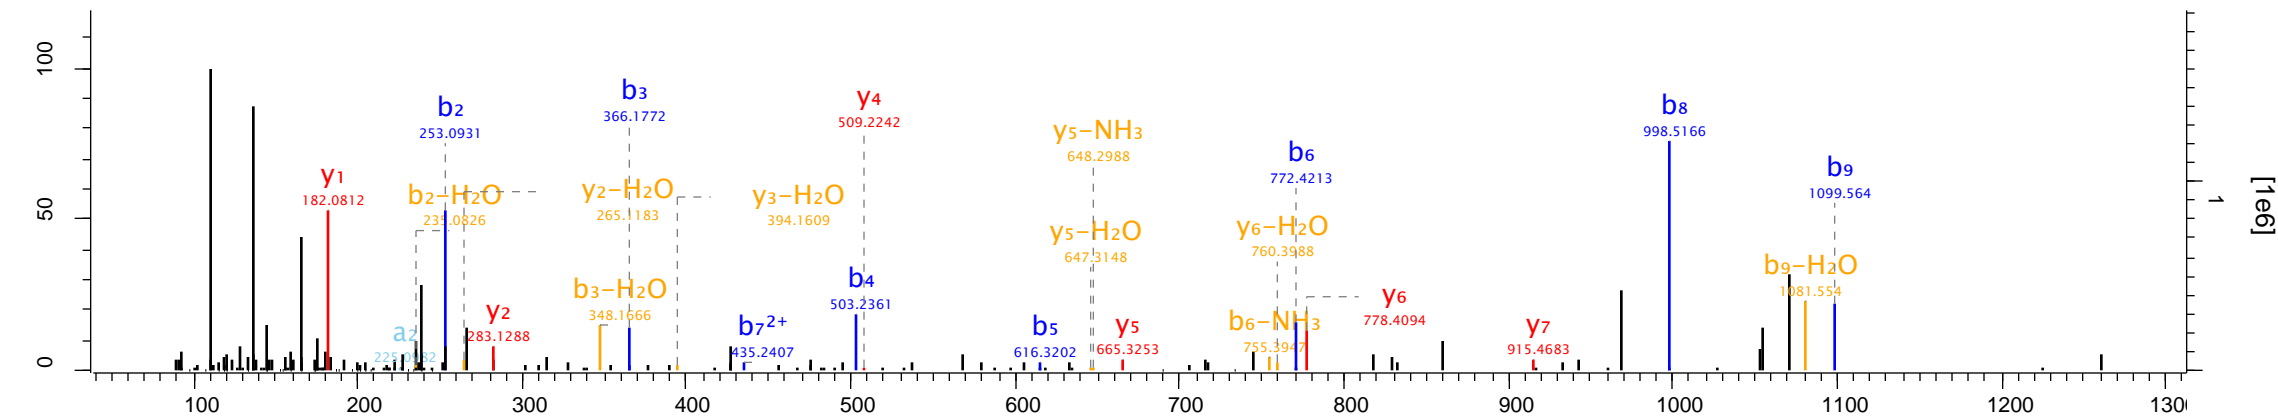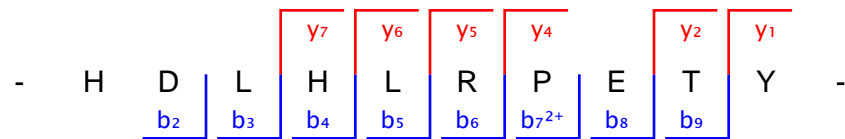

Raw file

ScanMethod Score m/z Gene names

20140602\_QEp4\_FaHo\_SA\_3973 FTMS; 98.4; 422.2 TY1B-ML1;TY1B-BR;TY1B-MR2;TY1B-OR;TY1B-DR1;TY1B-NL2;TY1B-PR2;TY1B-DR5;TY1B-PR1;TY1B-JR2;TY1B-NL1;TY1B-OL;TY1B-LR4;TY1B-ML2;TY1B-DR3;TY1B-P

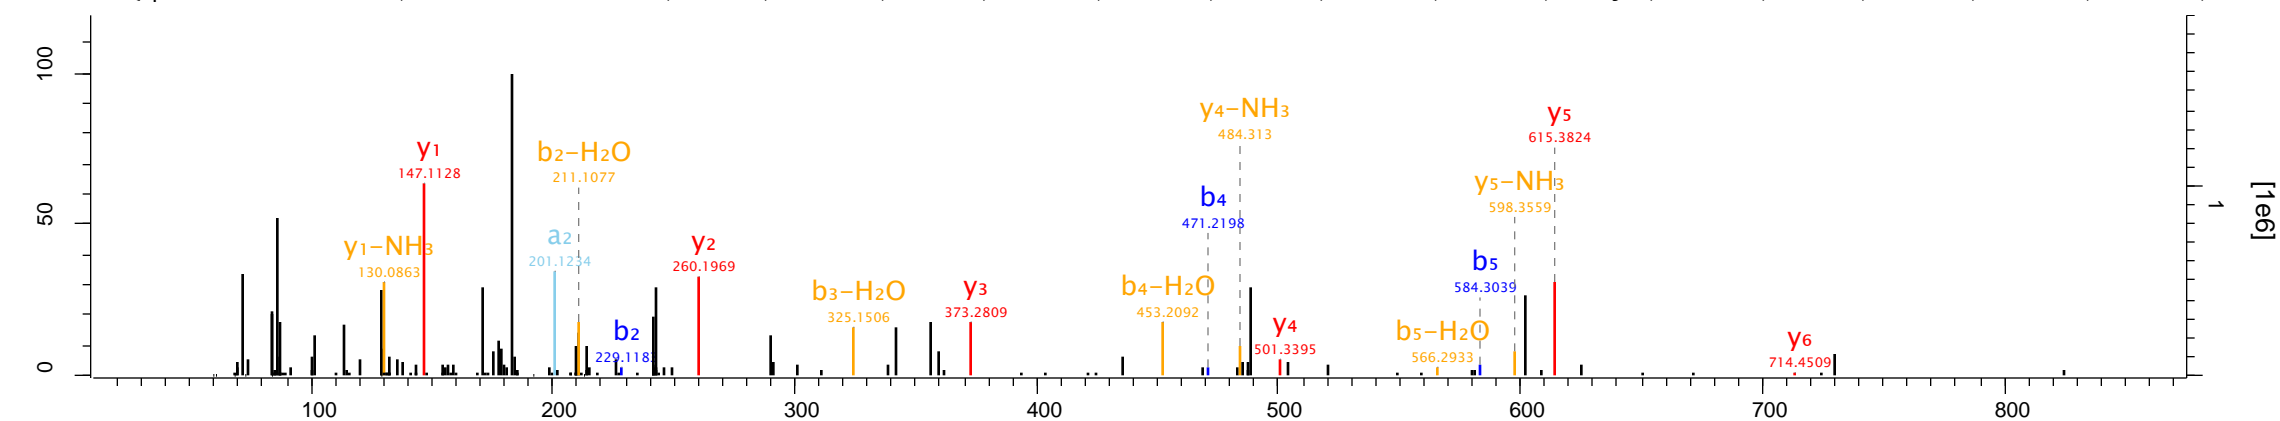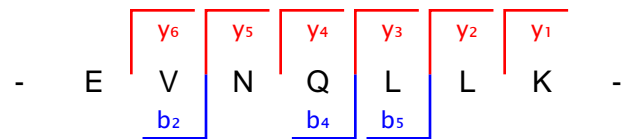

20140602\_QEp4\_Fa 42

A 630 389 TY1B-ML1;TY1B-BR;TY1B-H;TY1B-MR2;TY1B-OR;TY1B-DR1;TY1B-NL2;TY1B-PR2;TY1B-DR5;TY1B-PR1;TY1B-JR2;TY1B-NL1;TY2B-C;TY1B-OL;TY1B-LR4;TY1B-ML2;TY1B-DR3;TY1B-

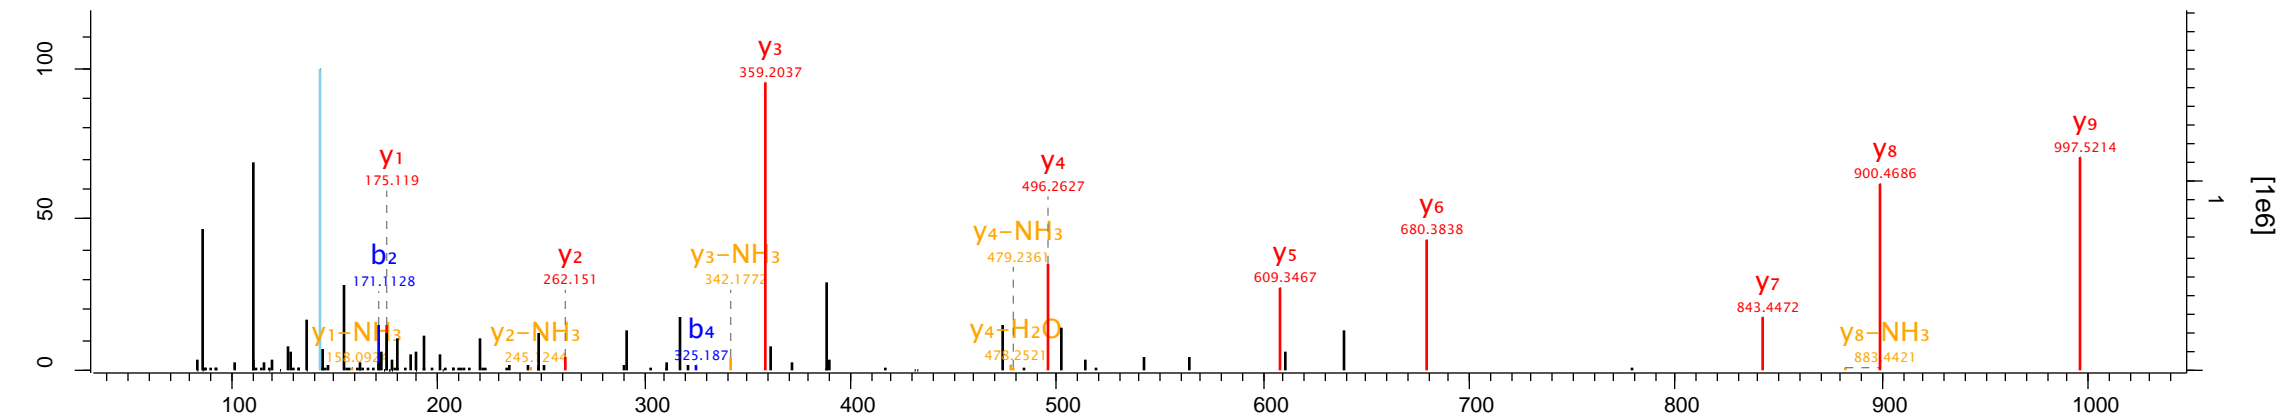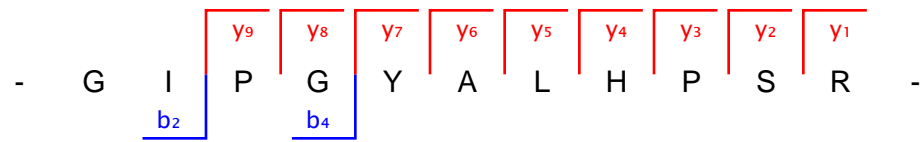

Raw file Scan Method Score m/z Gene names

20140602\_QEp4\_FaHo\_SA\_EAF 4566 FTMS; 94.02 492.9 TY1B-ML1;TY1B-BR;TY1B-H;TY1B-MR2;TY1B-OR;TY1B-PR2;TY1B-DR5;TY1B-PR1;TY1B-JR2;TY1B-NL1;TY1B-OL;TY1B-LR4;TY1B-ML2;TY1B-PR3;TY1B-PL;TY1B-

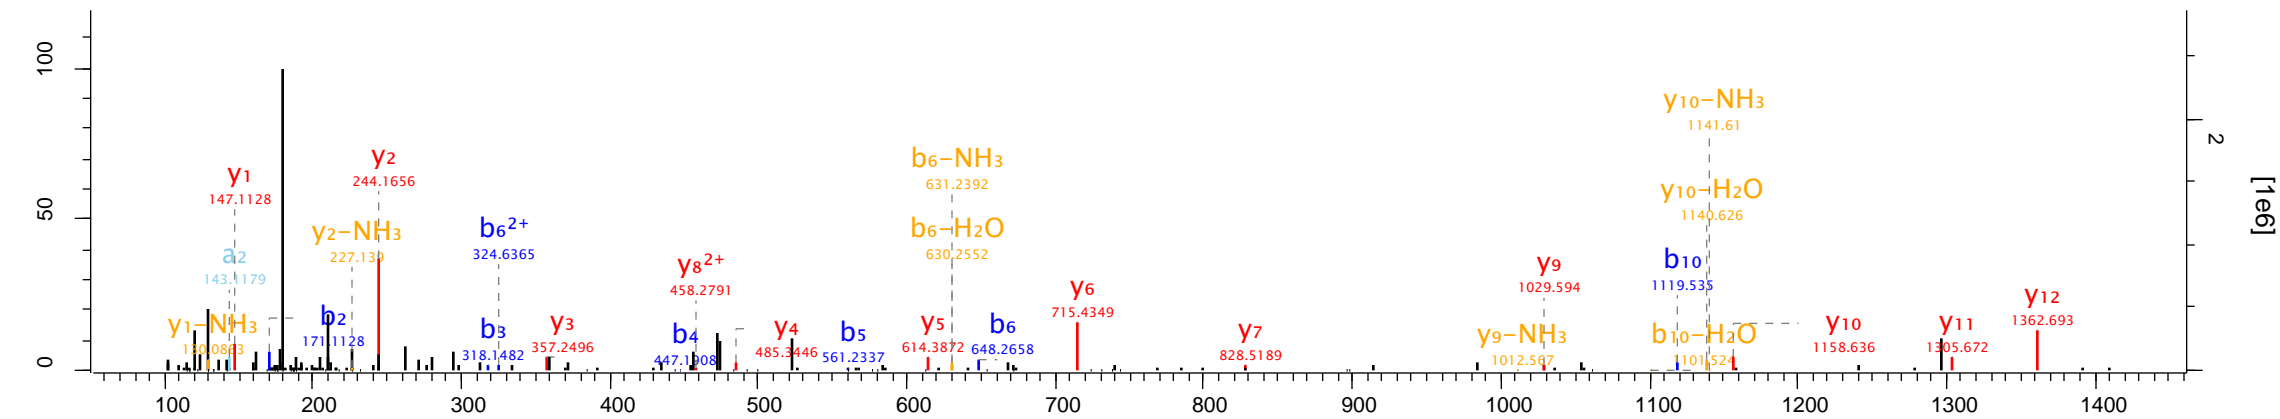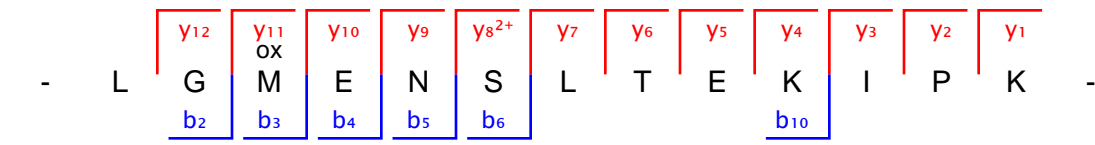

Raw file

ScanMethod Score m/z Gene names

20140602\_QEp4\_FaHo\_SA\_58991.FTMS; 120.6 364.8 TY1B-ML1;TY1B-BR;TY1B-H;TY1B-MR2;TY1B-OR;TY1B-DR1;TY1B-NL2;TY1B-PR2;TY1B-DR5;TY1B-PR1;TY1B-JR2;TY1B-NL1;TY1B-OL;TY1B-LR4;TY1B-ML2;TY1B-DR3

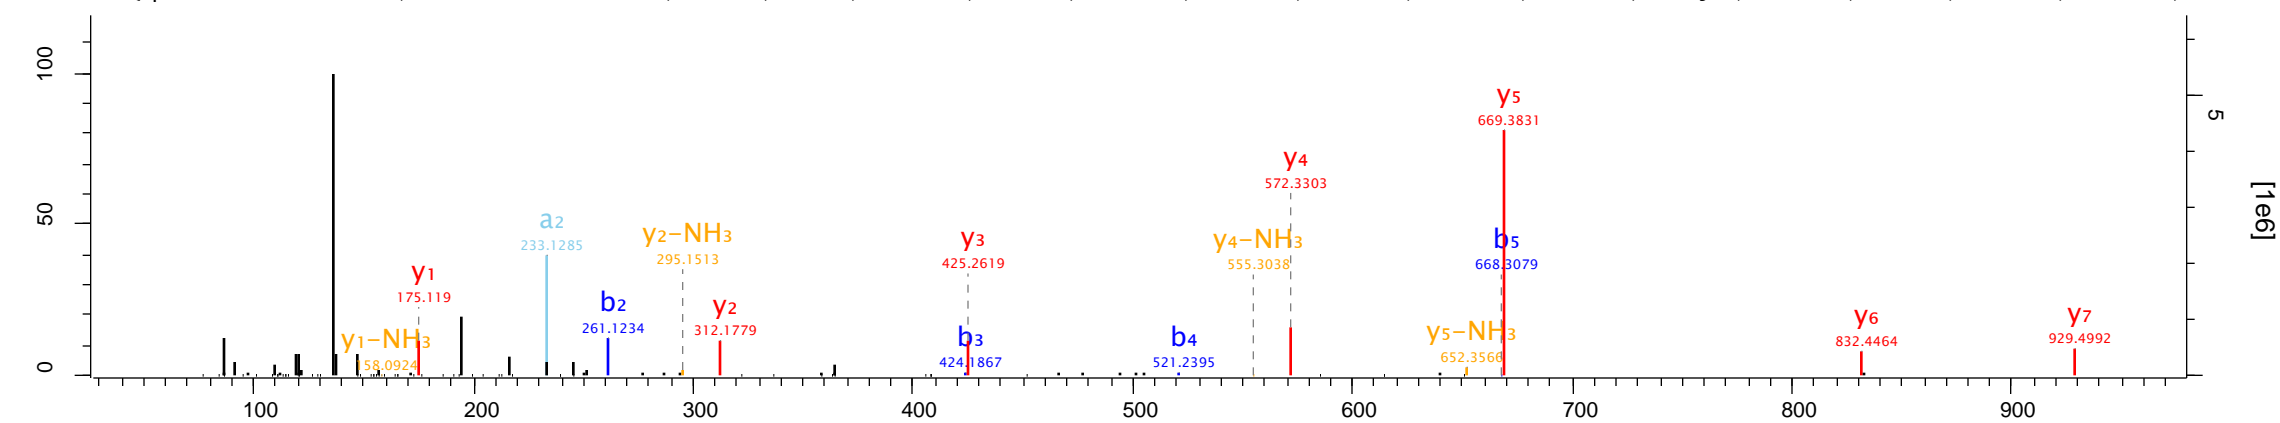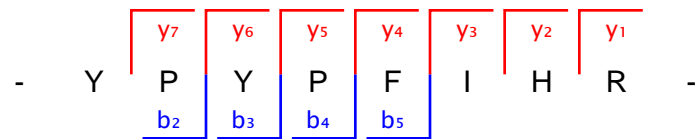

Raw file

Scan Method

Score

m/z

Gene names

20140602\_QEp4\_FaHo\_SA\_EAF3 5992 FTMS; 137.1{479.7{TY2B-C;TY2B-B;TY2B-GR2;TY2B-F;TY2B-GR1;TY2A-GR1;TY2B-OR1;TY2A-DR2;TY2B-DR1;TY2B-DR3;TY2B-LR1;TY2B-OR2;TY2A-OR1;TY2A-LR2;TY2A-OR2;

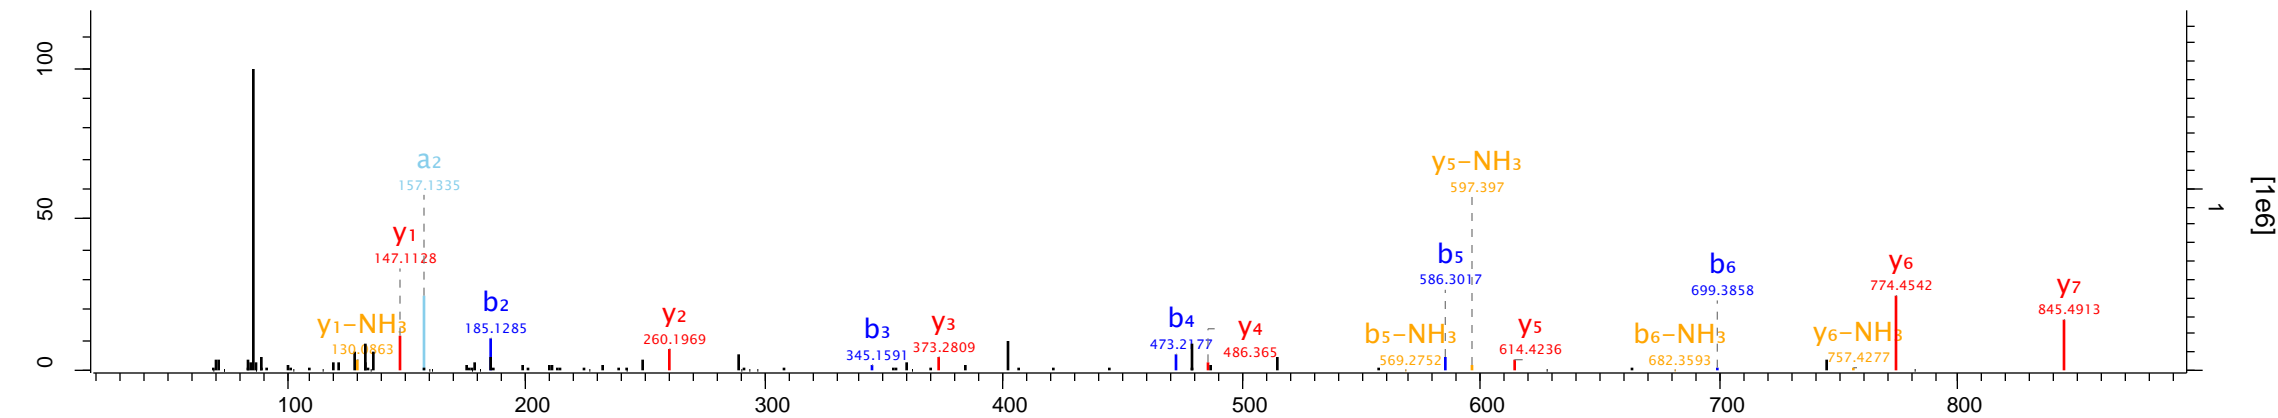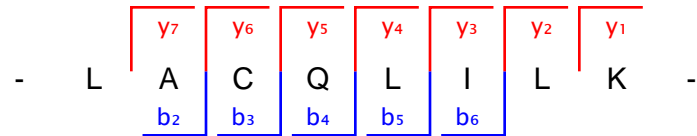



20140602\_QEp4\_FaHo\_SA\_EA 61 & FTMS; 54.27 431.5 TY1B-ML1;TY1B-BR;TY1B-H;TY1B-MR2;TY1B-OR;TY1B-DR1;TY1B-NL2;TY1B-PR2;TY1B-DR5;TY1B-PR1;TY1B-JR2;TY1B-NL1;TY1B-OL;TY1B-LR4;TY1B-ML2;TY1B-

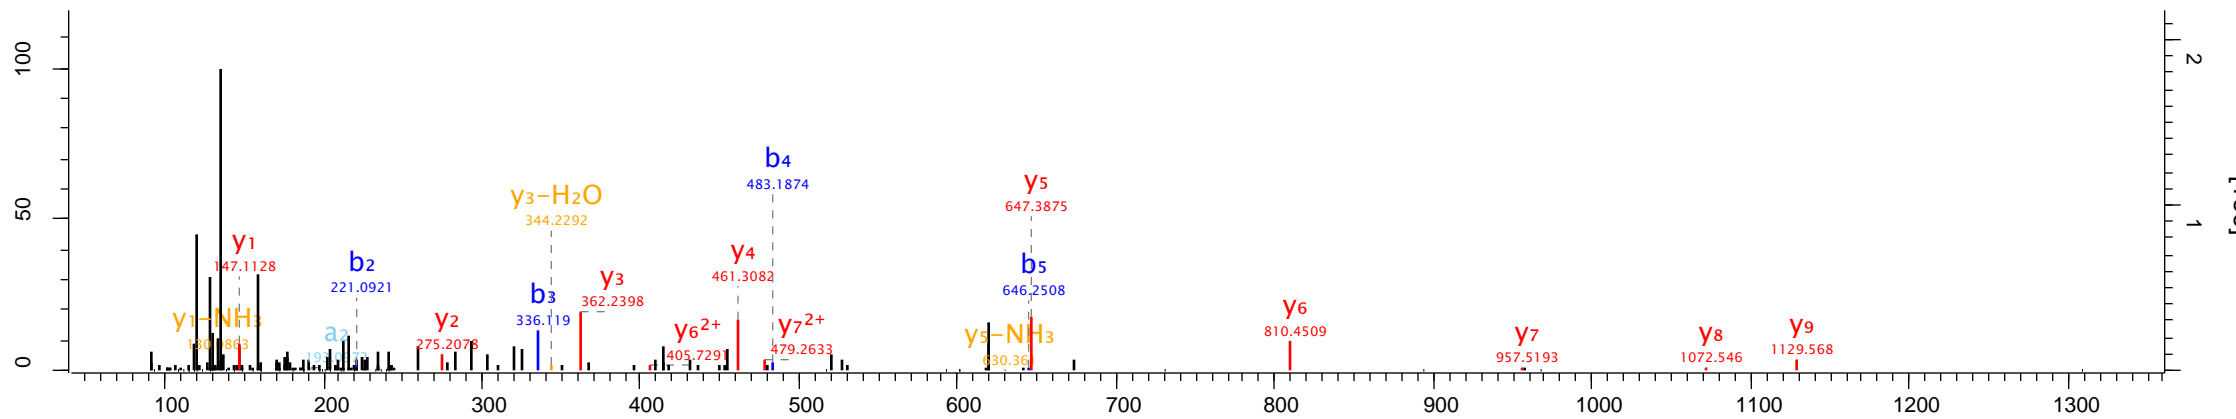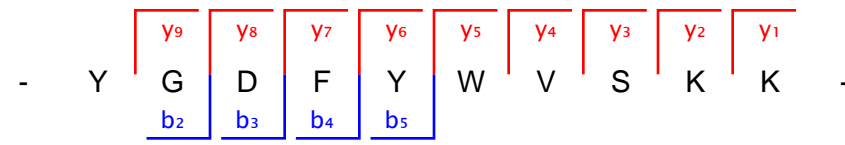

Raw file Scan Method Score m/z Gene names

20140602\_QEp4\_FaHo\_SA\_E\_7064\_FTMS; 107.5 614.8 TY1B-PR1;TY1B-JR2;TY2B-C;TY1B-OL;TY1B-LR4;TY1B-ML2;TY1B-DR3;TY1B-PR3;TY1B-PL;TY1B-LR2;TY1B-DR6;TY1B-A;TY2B-B;TY2B-GR2;TY2B-F;TY2B-GR1;TY2

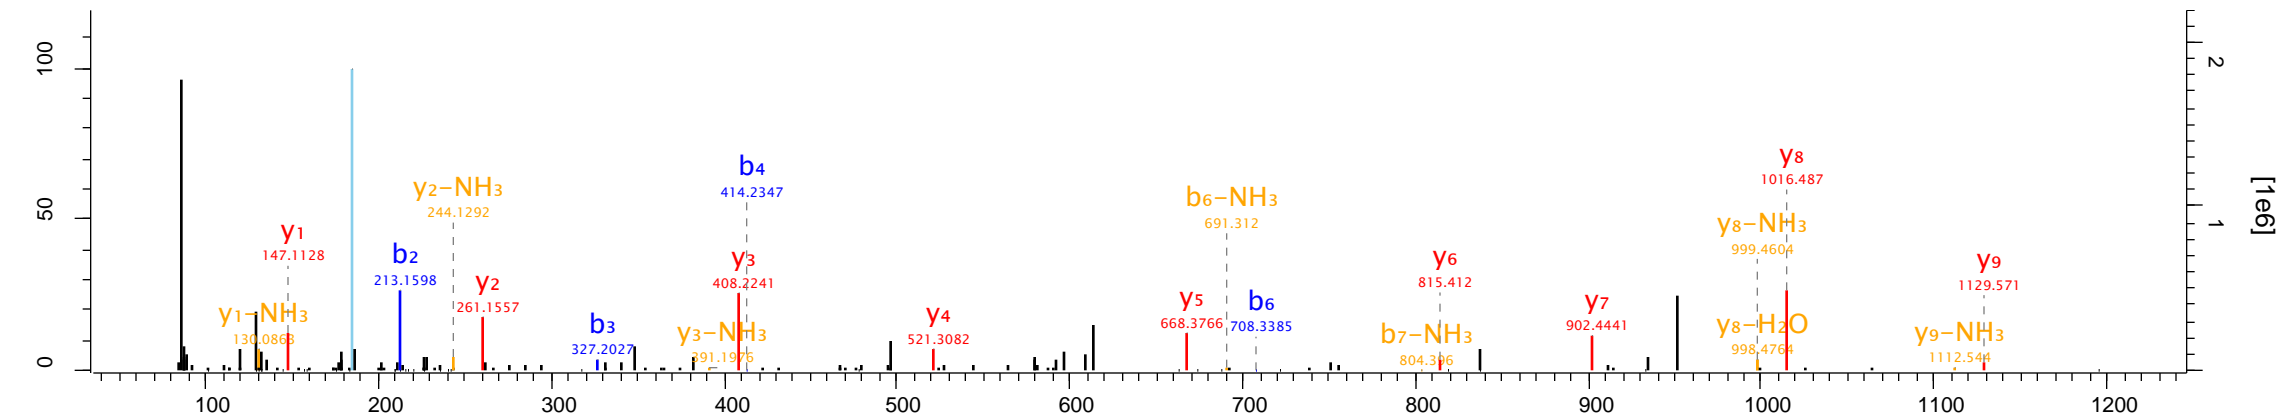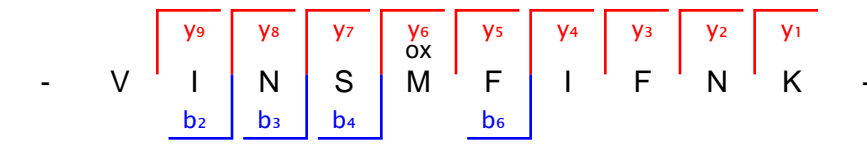

Raw file Scan Method Score m/z Gene names

20140602\_QEp4\_FaHo\_SA\_EA 798 FTMS; 114.51726.0 TY1B-DR1;TY1B-NL2;TY1B-PR1;TY2B-C;TY1B-OL;TY1B-LR4;TY1B-ML2;TY1B-DR3;TY1B-PL;TY1B-LR2;TY1B-DR6;TY1B-A;TY2B-B;TY2B-GR2;TY2B-F;TY2B-GR1;

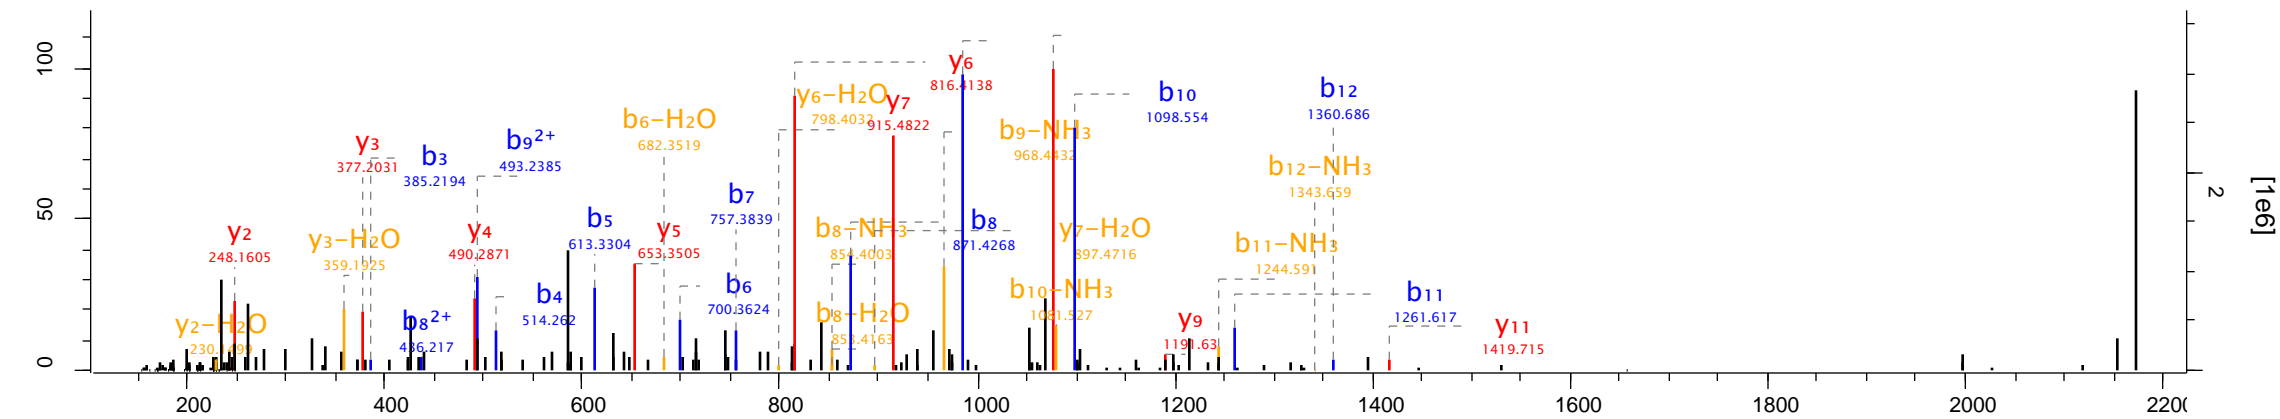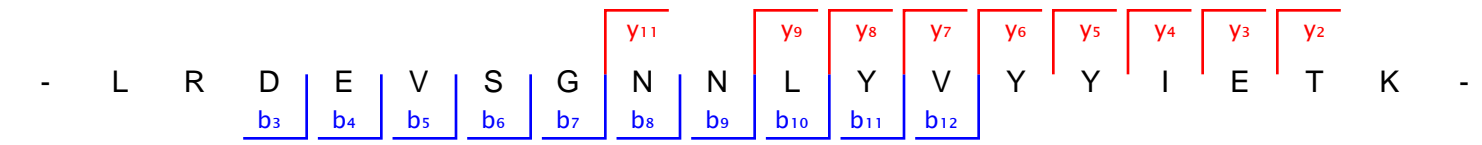

20140602\_QEp4\_Fa 835 A 880 592 TY1B-ML1;TY1B-BR;TY1B-H;TY1B-MR2;TY1B-OR;TY1B-DR1;TY1B-NL2;TY1B-PR2;TY1B-DR5;TY1B-PR1;TY1B-JR2;TY1B-NL1;TY2B-C;TY1B-OL;TY1B-LR4;TY1B-ML2;TY1B-DR3;TY1B-

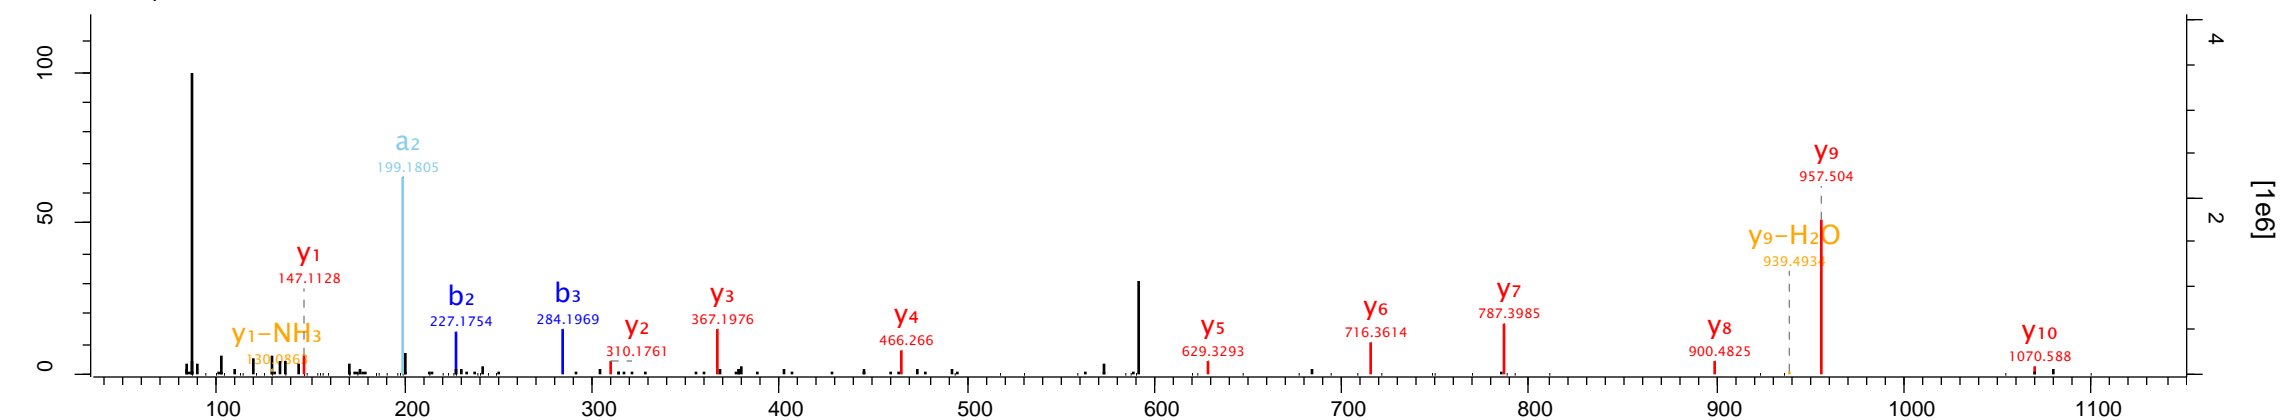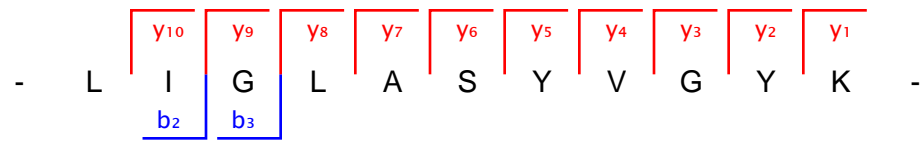

20140602\_QEp4\_FaHo\_SA\_219 FTMS; 183.7 503.9 TY1B-ML1;TY1B-BR;TY1B-H;TY1B-MR2;TY1B-OR;TY1B-DR1;TY1B-NL2;TY1B-PR2;TY1B-DR5;TY1B-PR1;TY1B-JR2;TY1B-NL1;TY1B-OL;TY1B-LR4;TY1B-ML2;TY1B-DR

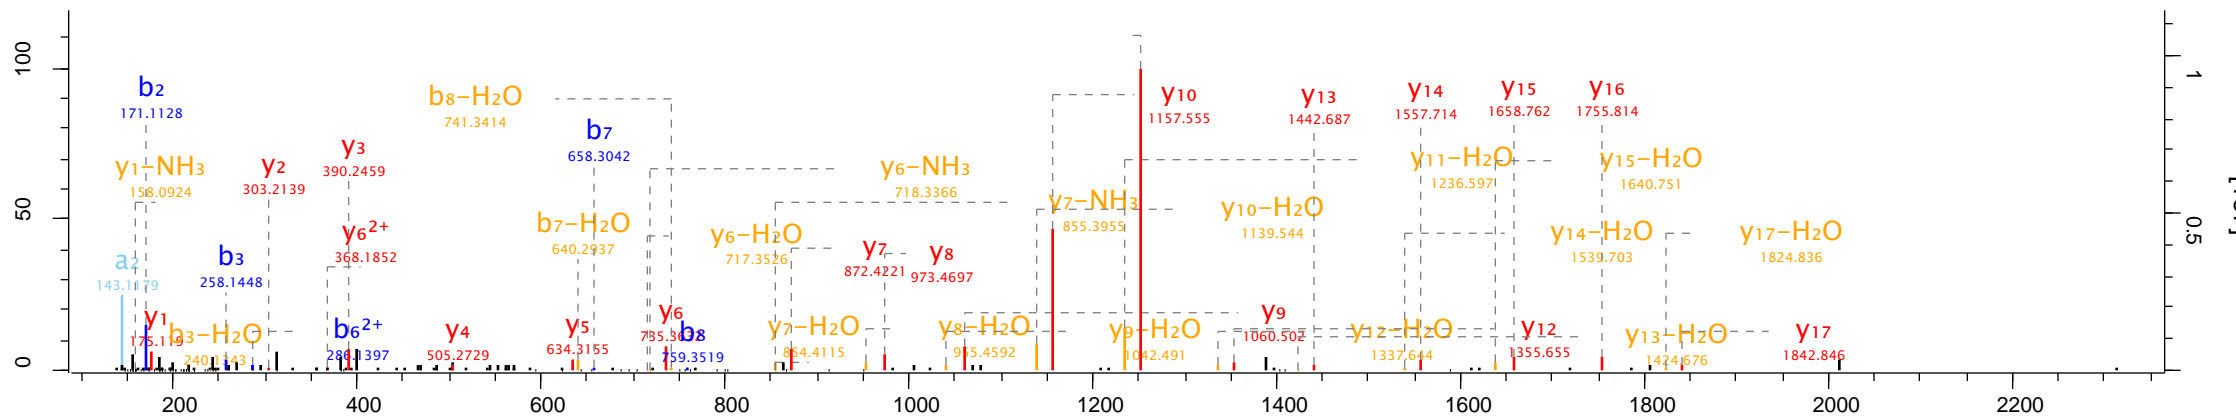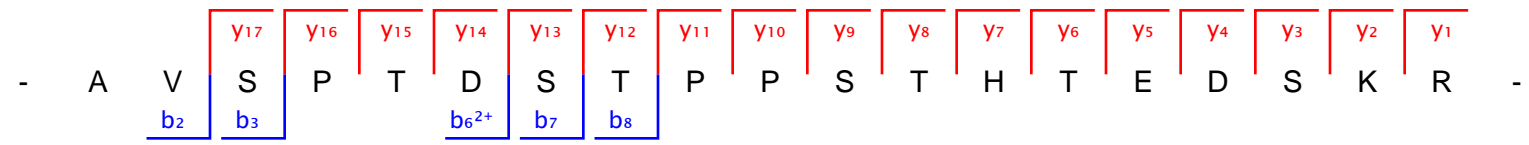

Raw file

Scan Method Score m/z Gene names

20140602\_QEp4\_FaHo\_SA\_E2681\_FTMS; 74.61409.2 TY1B-ML1;TY1B-BR;TY1B-H;TY1B-MR2;TY1B-OR;TY1B-DR1;TY1B-NL2;TY1B-PR2;TY1B-DR5;TY1B-PR1;TY1B-JR2;TY1B-NL1;TY1B-OL;TY1B-LR4;TY1B-ML2;TY1B-D

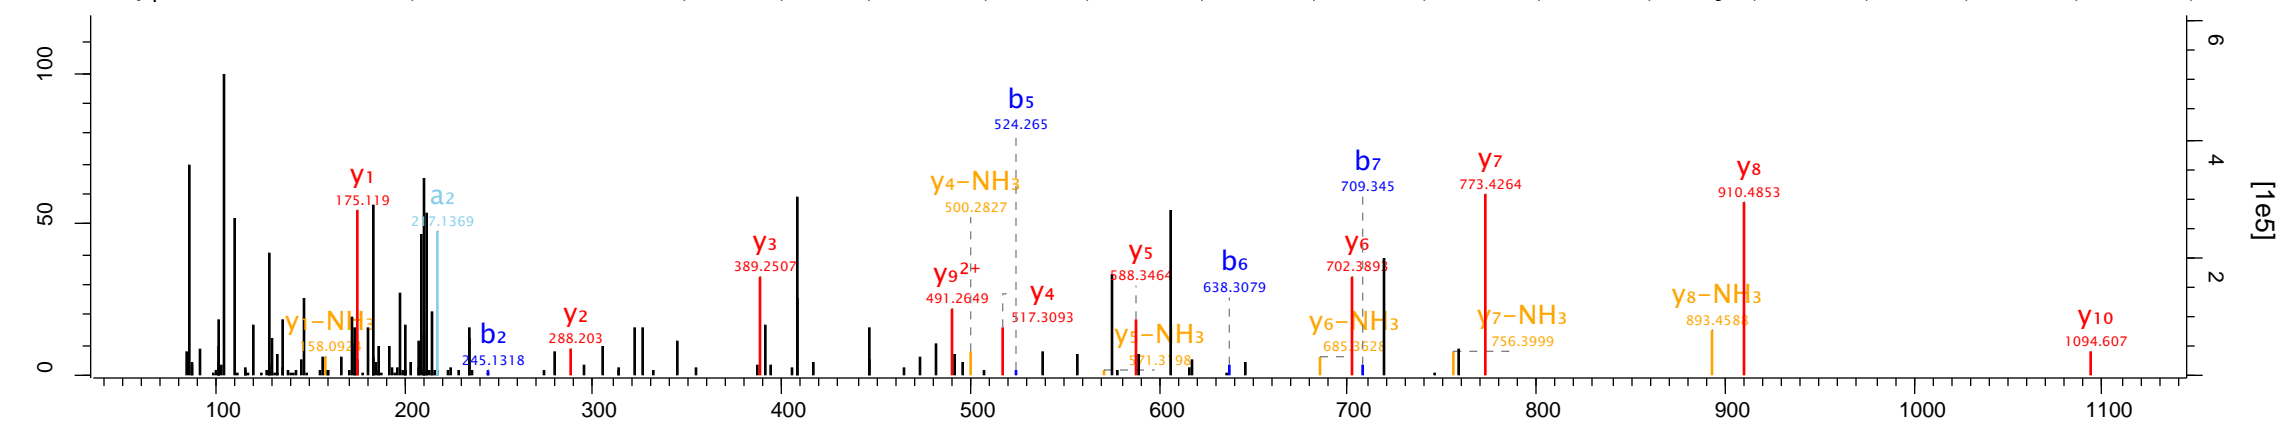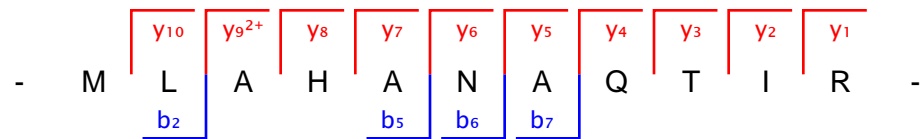

Raw file 20140602\_QEp4\_FaHo\_SA\_EAF3\_03 Scan 3033 Method FTMS; HCD Score 183.01 m/z 667.31 Gene names TY1B-LR4

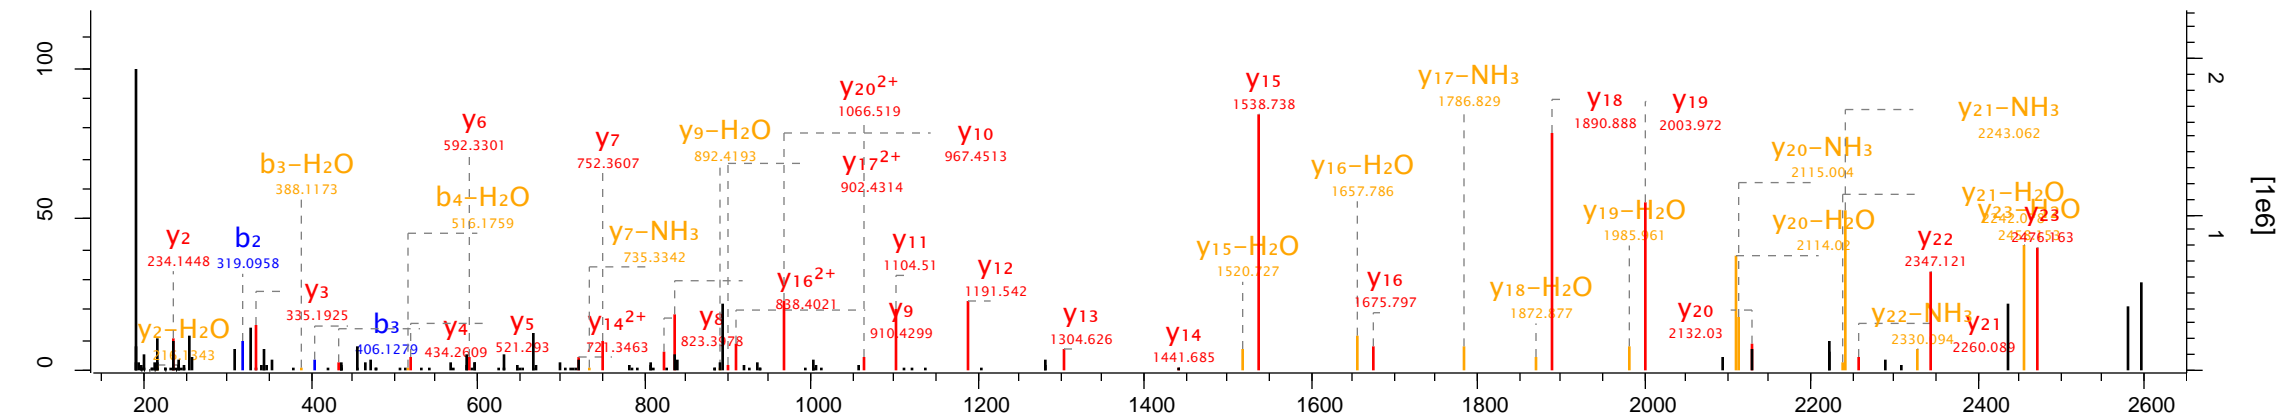

ac ox M E S Q Q L S Q H P H I S H G S A C A S V T S K -

b<sub>2</sub> b<sub>3</sub>

20140602\_QEp4\_FaHo\_SA\_376: FTMS; 40.0: 491.5 TY1B-ML1;TY1B-BR;TY1B-H;TY1B-MR2;TY1B-OR;TY1B-DR1;TY1B-NL2;TY1B-PR2;TY1B-DR5;TY1B-PR1;TY1B-JR2;TY1B-NL1;TY1B-OL;TY1B-LR4;TY1B-ML2;TY1B-DR3;

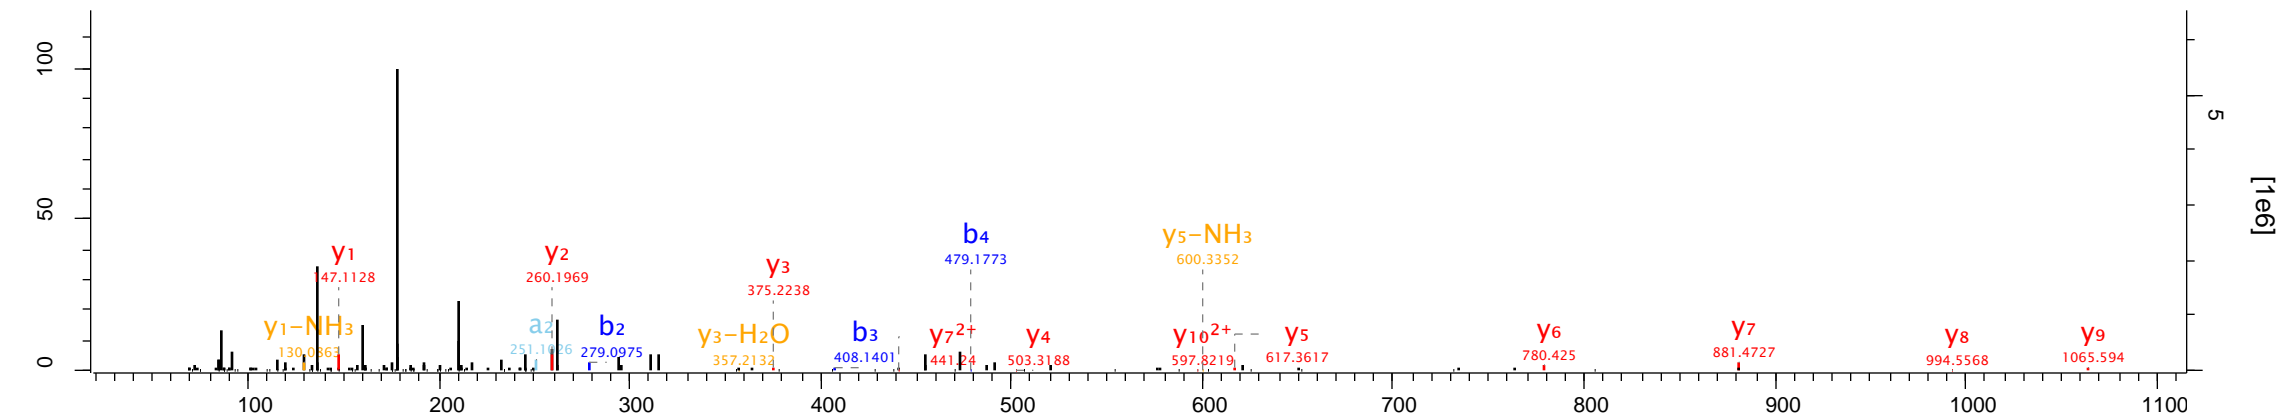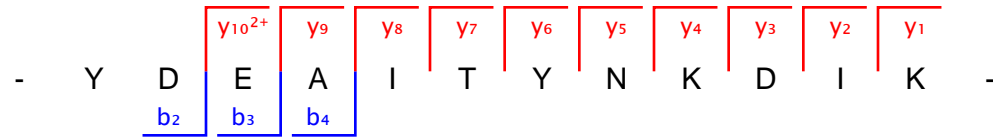



20140602\_QEp4\_FaHo\_S 624 FTMS; 179.6894.5 TY1B-ML1;TY1B-H;TY1B-DR1;TY1B-NL2;TY1B-PR2;TY1B-DR5;TY1B-PR1;TY2B-C;TY1B-OL;TY1B-LR4;TY1B-ML2;TY1B-DR3;TY1B-PR3;TY1B-PL;TY1B-LR2;TY1B-DR6;TY1B-

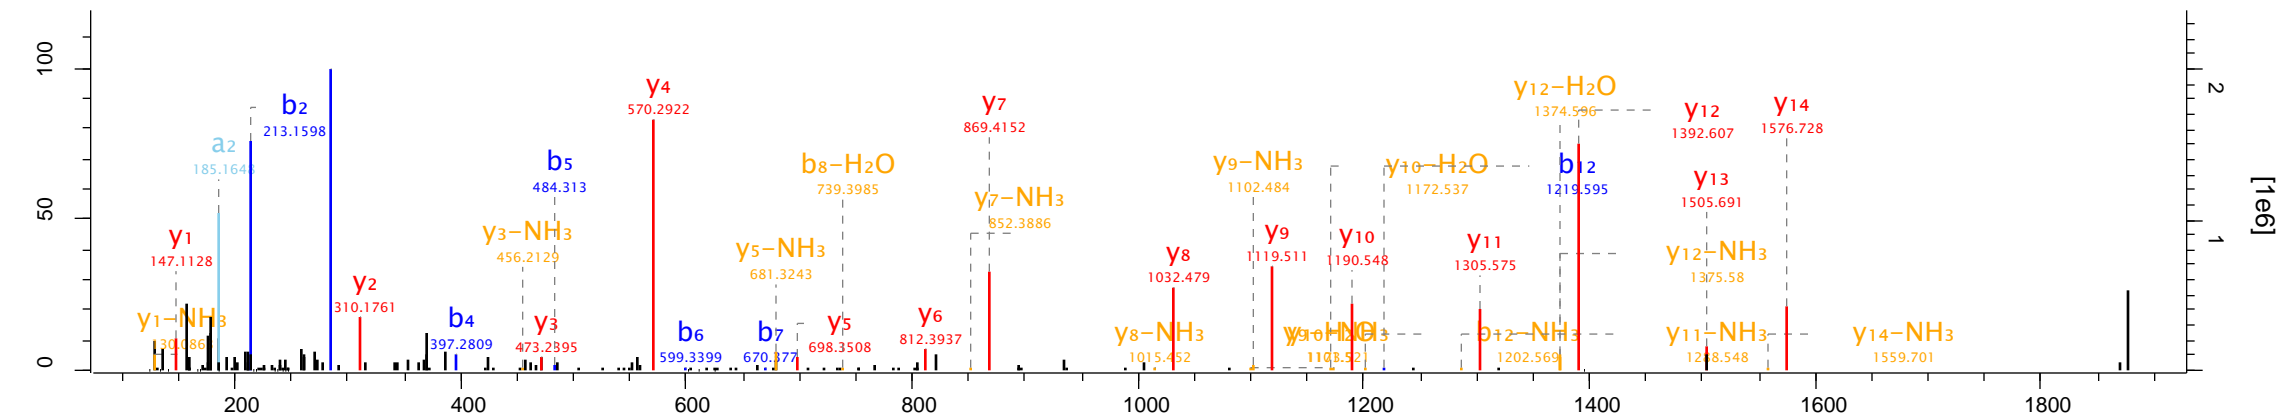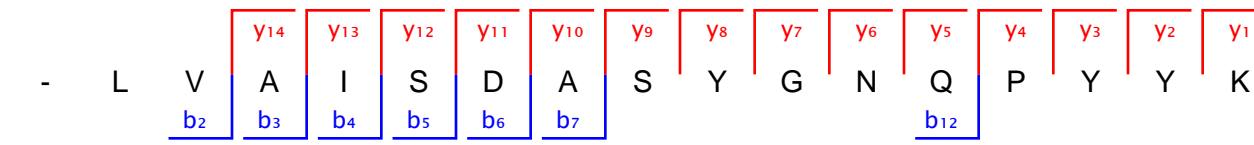

Raw file Scan Method Score m/z Gene names

20140602\_QEp4\_FaHo\_SA\_EAF3\_0: 9689 FTMS; HCD 132.39 788.15 TY1B-ML1;TY1B-BR;TY1B-H;TY1B-MR2;TY1B-OR;TY1B-NL2;TY1B-PR2;TY1B-PR1;TY1B-JR2;TY1B-NL1;TY1B-OL;TY1B-ML2;TY1B-PR3;TY1B-BL;TY1B-M

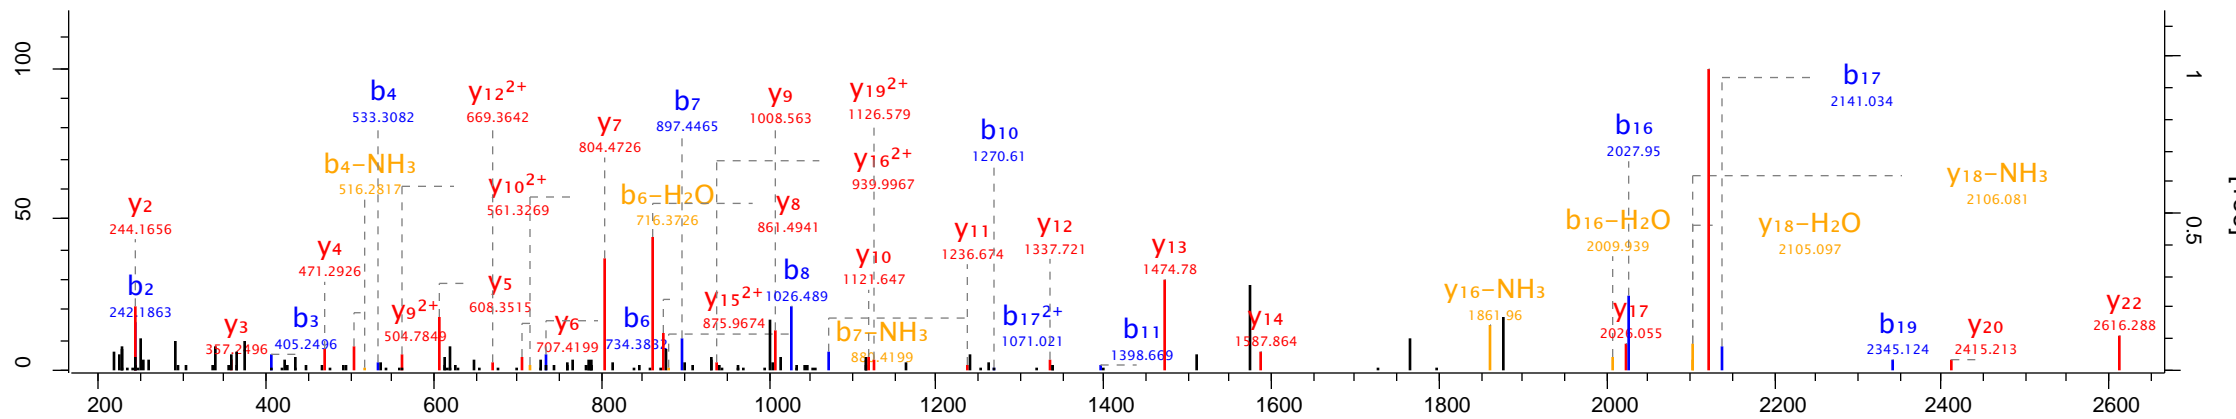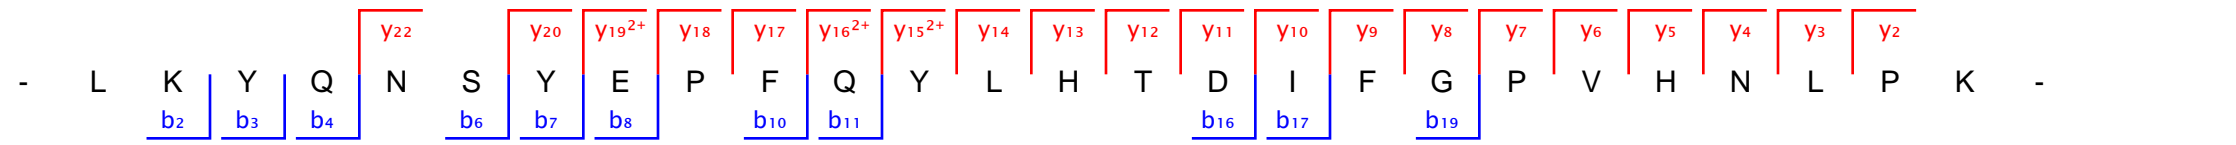

| Raw file                      | Scan | Method    | Score  | m/z    | Gene names |
|-------------------------------|------|-----------|--------|--------|------------|
| 20140602_QEp4_FaHo_SA_ECM5_03 | 5374 | FTMS; HCD | 116.03 | 437.89 | RPL24A     |

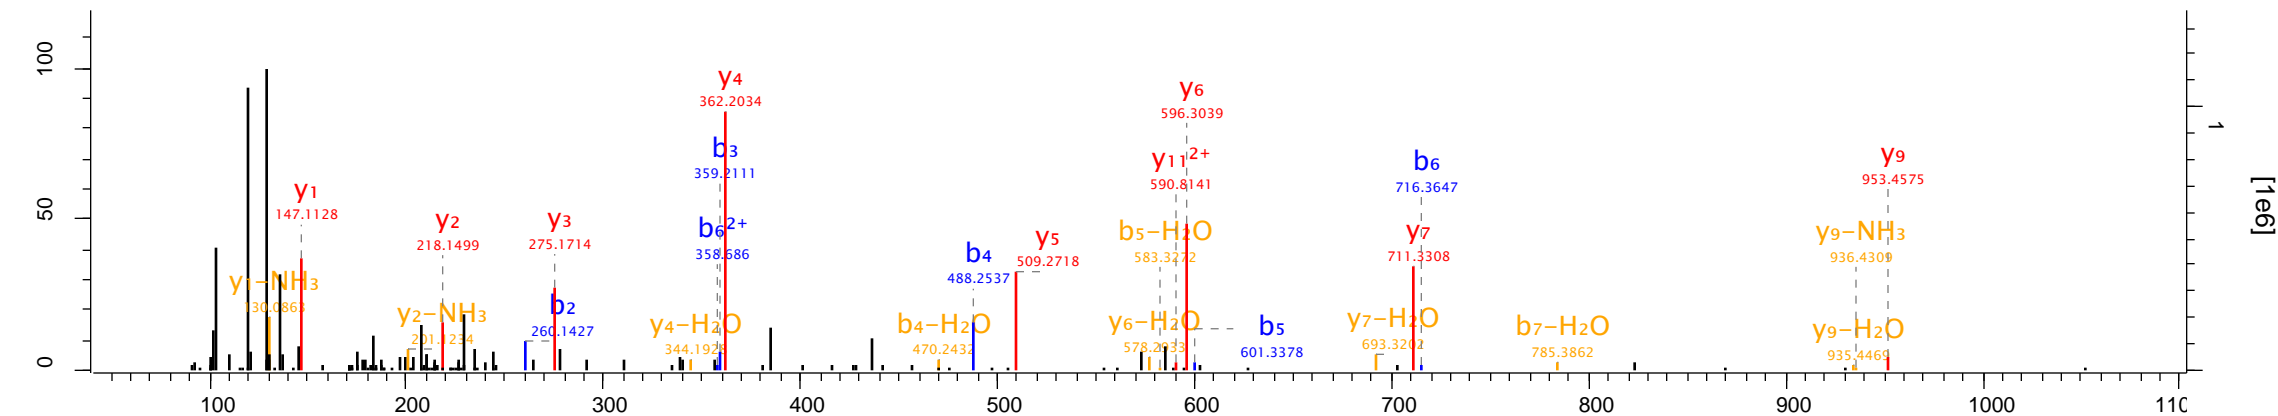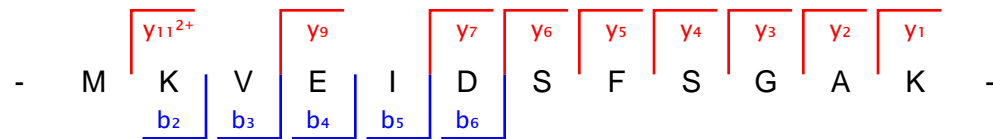

20140602\_QEp4\_FaHo\_SA\_620140602\_196.726.3 FTMS; 196.726.3 TY1B-ML1;TY1B-BR;TY1B-H;TY1B-MR2;TY1B-OR;TY1B-DR1;TY1B-NL2;TY1B-PR2;TY1B-DR5;TY1B-PR1;TY1B-JR2;TY1B-NL1;TY1B-OL;TY1B-LR4;TY1B-ML2;TY1B-DR3;

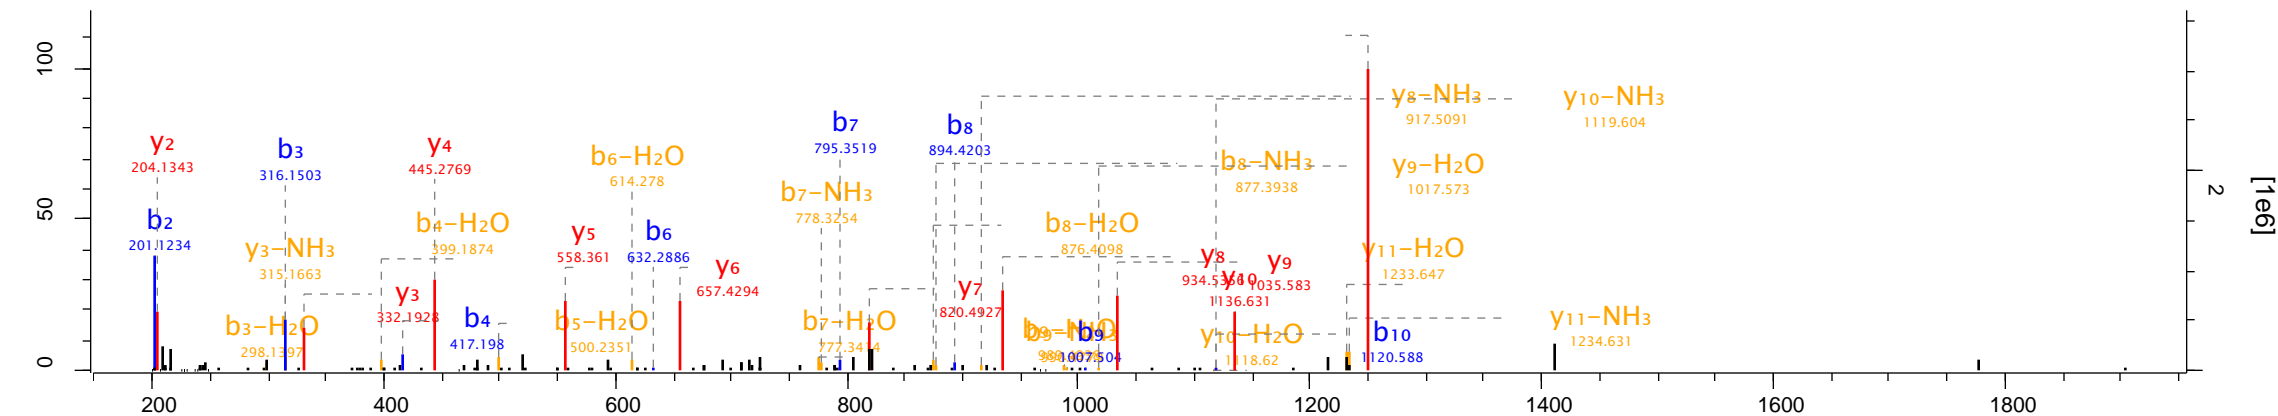

- T V D T T N Y V I L Q G K -

b<sub>2</sub> b<sub>3</sub> b<sub>4</sub> b<sub>6</sub> b<sub>7</sub> b<sub>8</sub> b<sub>9</sub> b<sub>10</sub>

y<sub>11</sub> y<sub>10</sub> y<sub>9</sub> y<sub>8</sub> y<sub>7</sub> y<sub>6</sub> y<sub>5</sub> y<sub>4</sub> y<sub>3</sub> y<sub>2</sub>

Raw file

20140602\_QEp4\_FaHo\_SA\_ECM5\_03

Scan Method Score m/z Gene names

9565 FTMS; HCD 171.21 797.39 ARF1;ARF2

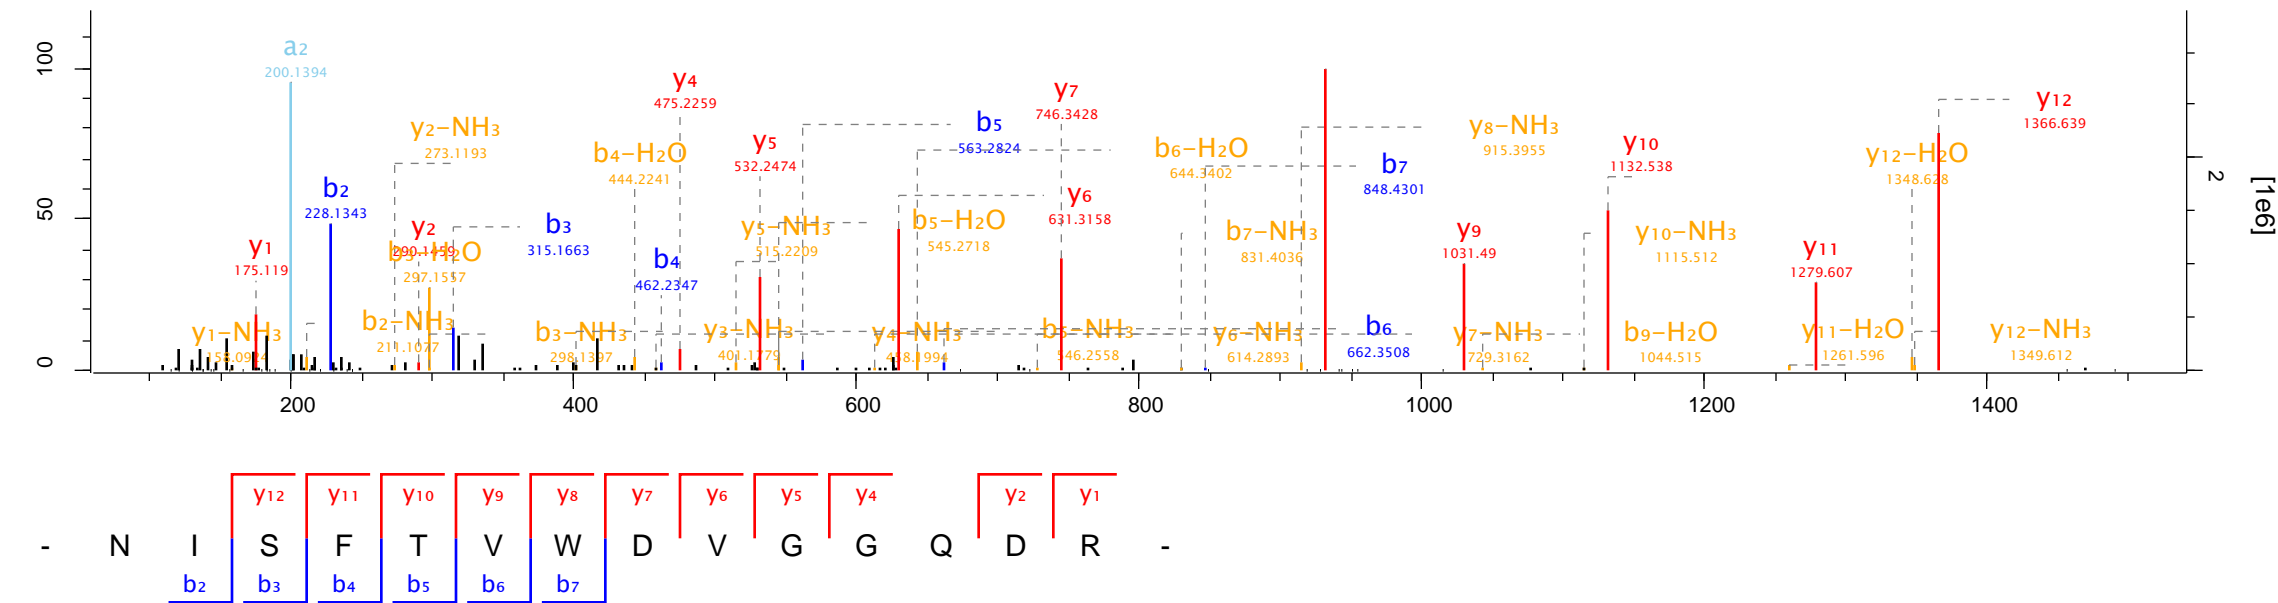

Raw file Scan Method Score m/z  
20140602\_QEp4\_FaHo\_SA\_GCN5\_01 4728 FTMS; HCD 14.16 495.25

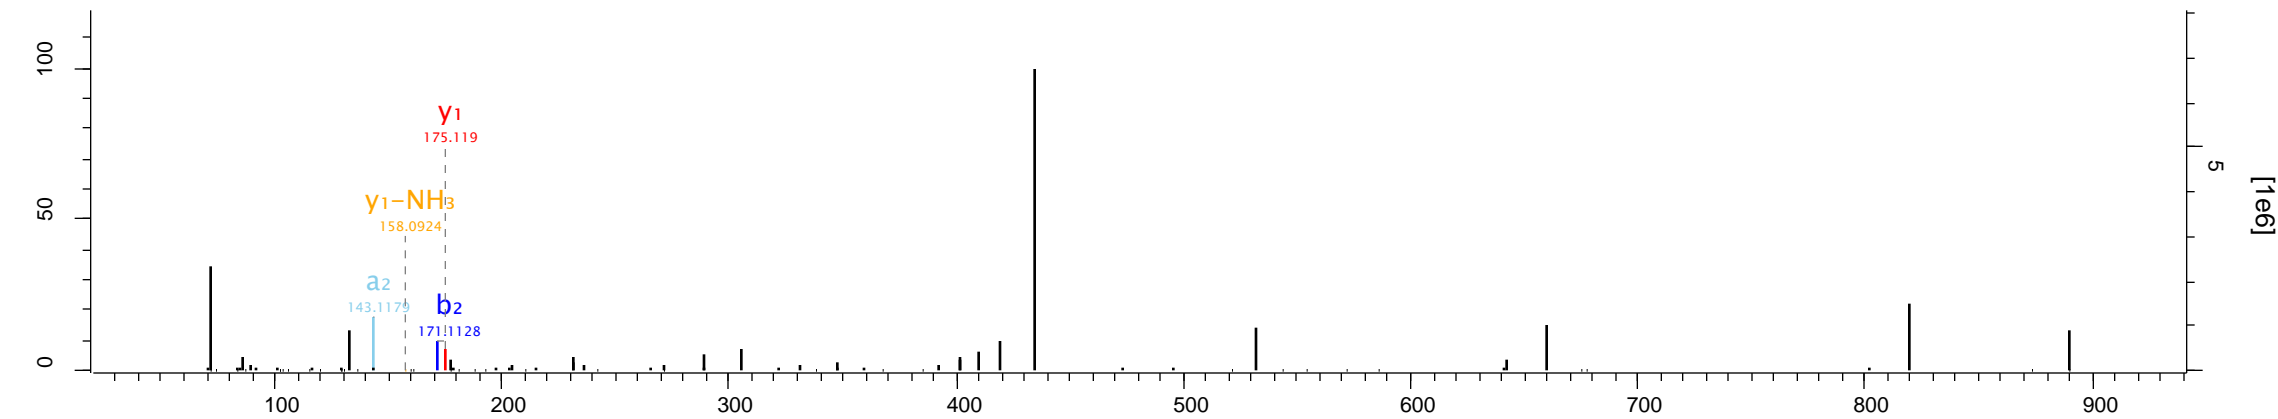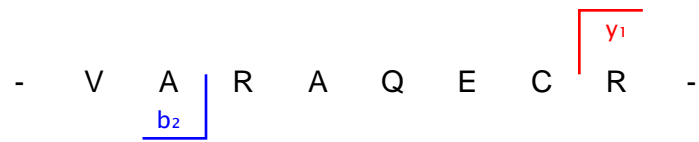

Raw file 20140602\_QEp4\_FaHo\_SA\_GCN5\_01 Scan 6510 Method FTMS; HCD Score 207.04 m/z 731.38 Gene names RPL17A;RPL17B

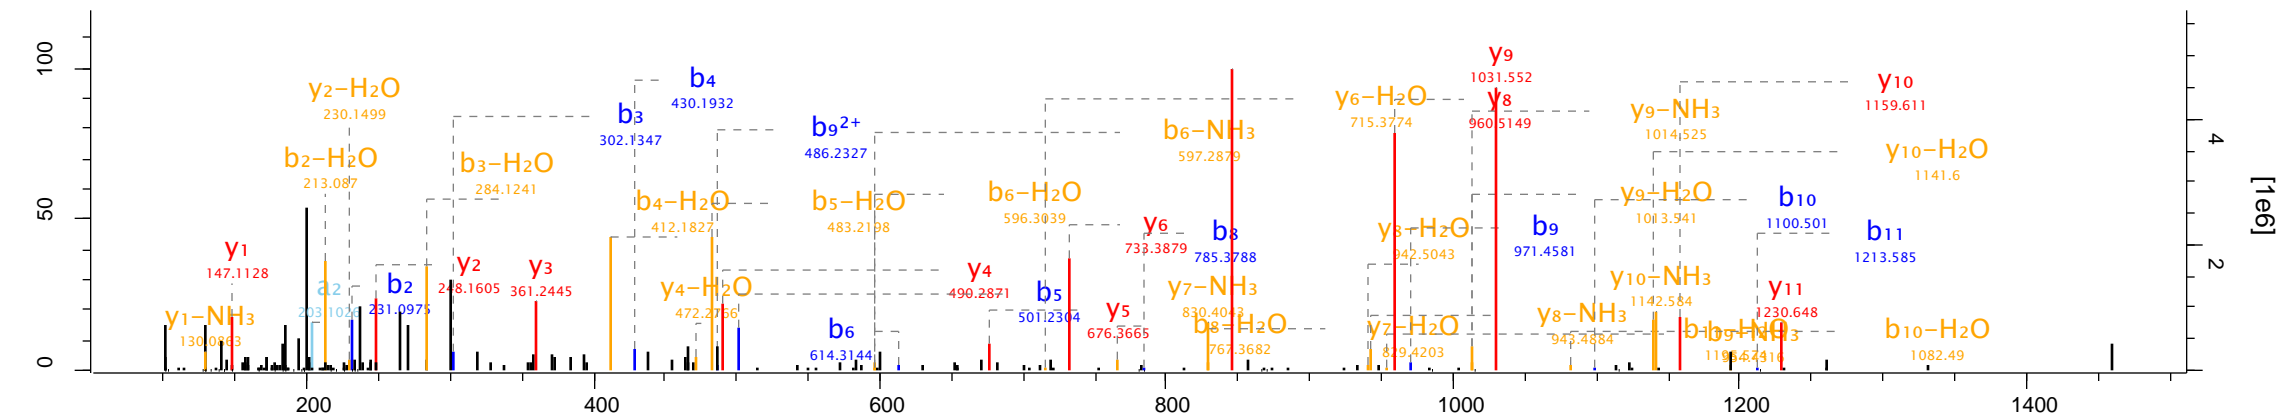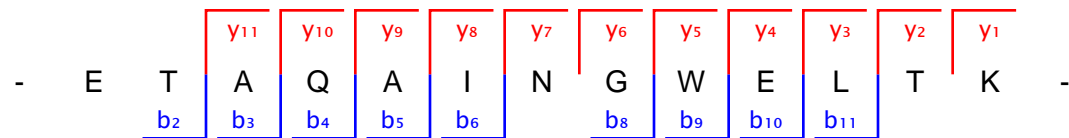

20140602\_QEp4\_FaHo\_SA\_(8665) FTMS; 150.9815.( TY1B-ML1;TY1B-BR;TY1B-H;TY1B-MR2;TY1B-OR;TY1B-DR1;TY1B-NL2;TY1B-PR2;TY1B-DR5;TY1B-PR1;TY1B-JR2;TY1B-NL1;TY1B-OL;TY1B-LR4;TY1B-ML2;TY1B-DR

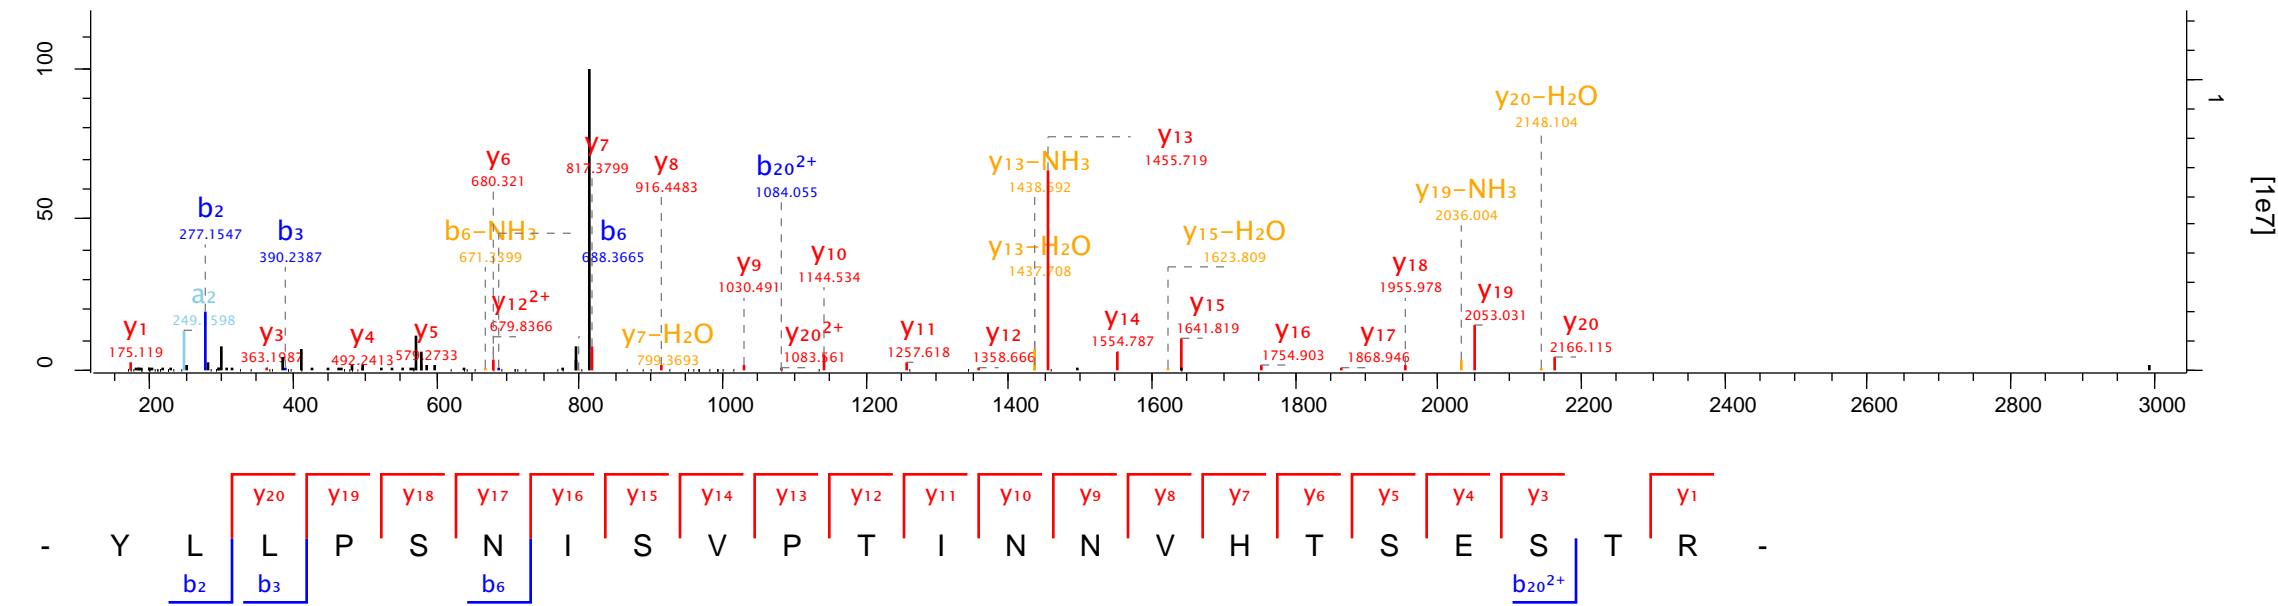



Raw file Scan Method Score m/z Gene names  
 20140602\_QEp4\_FaHo\_SA\_GCN5\_01 8932 FTMS; HCD 313.37 1008.01 RPS14B;RPS14A

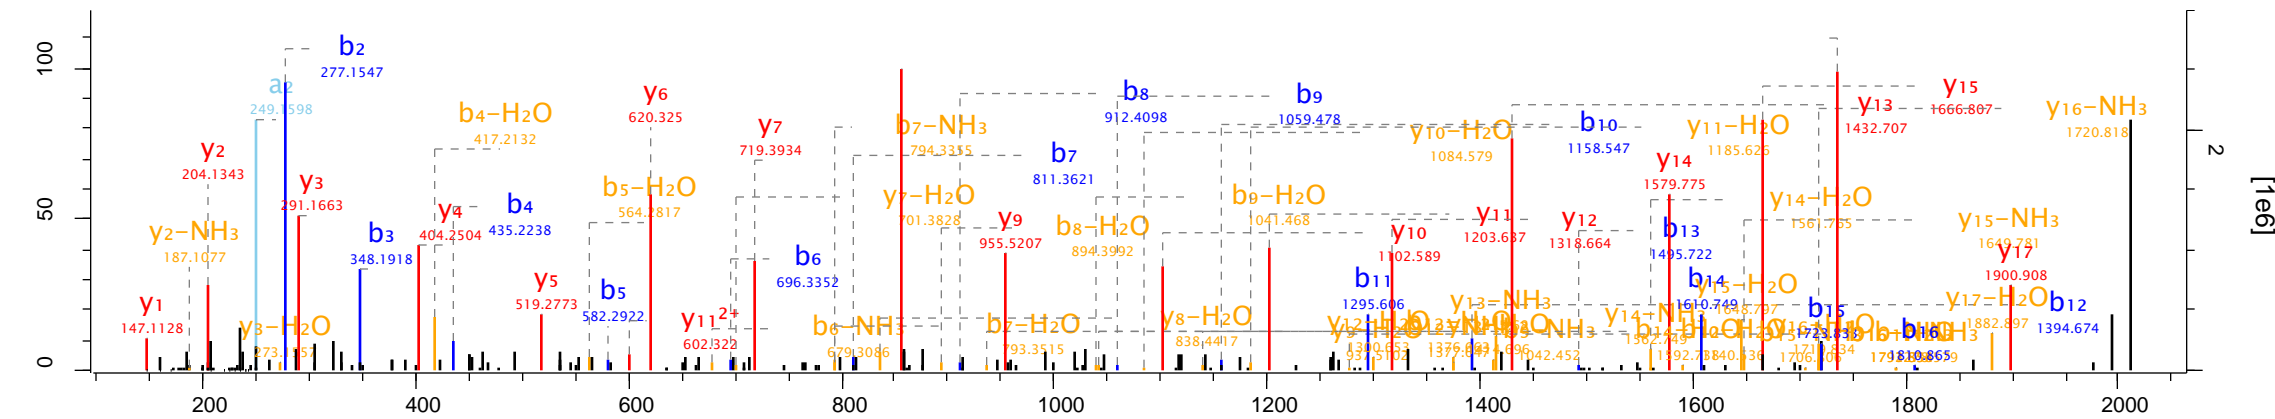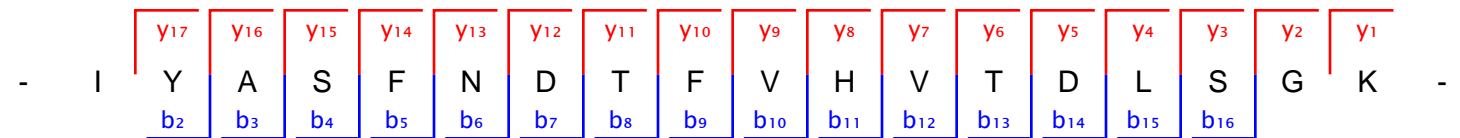

Raw file 20140602\_QEp4\_FaHo\_SA\_GCN5\_01 Scan 9012 Method FTMS; HCD Score 183.03 m/z 606.87 Gene names RPL14B;RPL14A

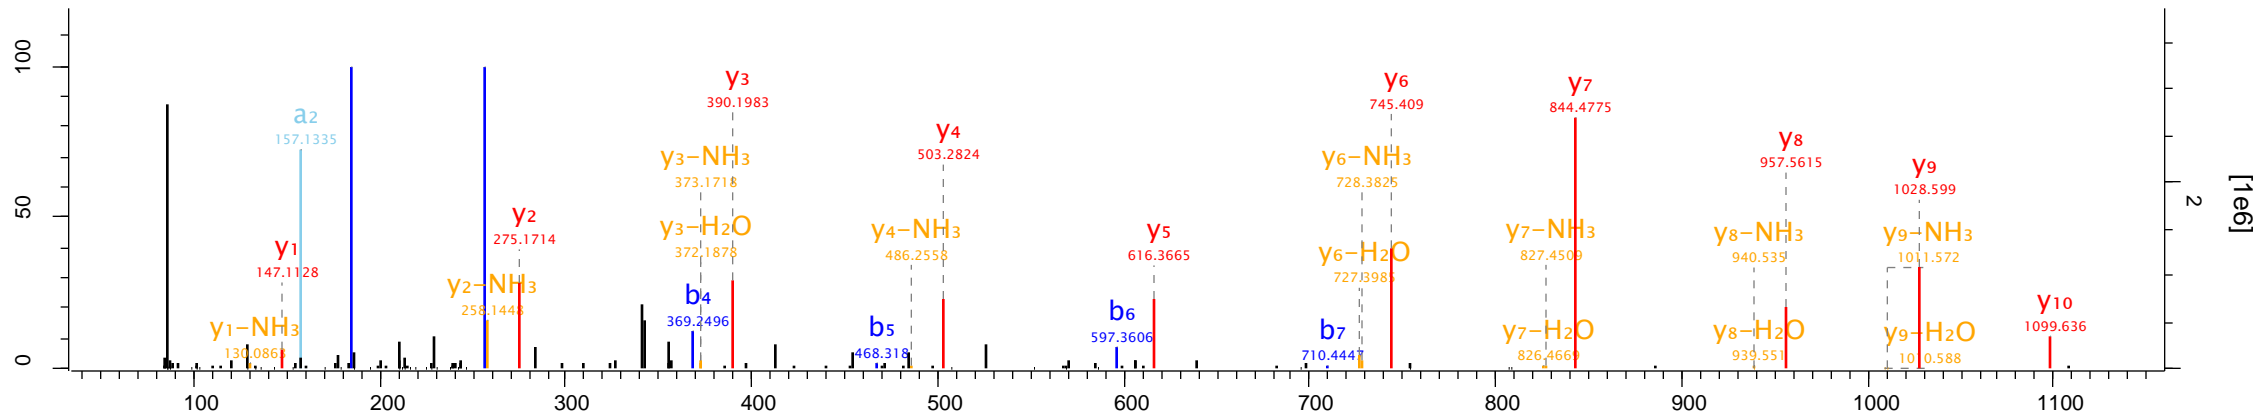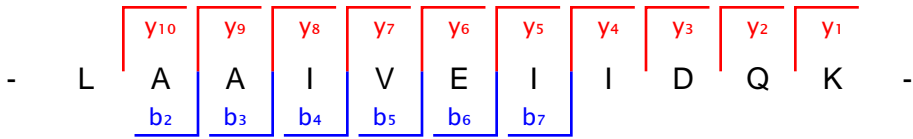

20140602\_QEp4\_FaHo.101 (FTMS) 320.1130. TY1B-ML1;TY1B-BR;TY1A-PR1;TY1A-A;TY1A-DR4;TY1B-H;TY1B-MR2;TY1B-OR;TY1B-DR1;TY1B-NL2;TY1B-PR2;TY1B-DR5;TY1B-PR1;TY1B-JR2;TY1A-PL;TY1A-LR2;TY1A-

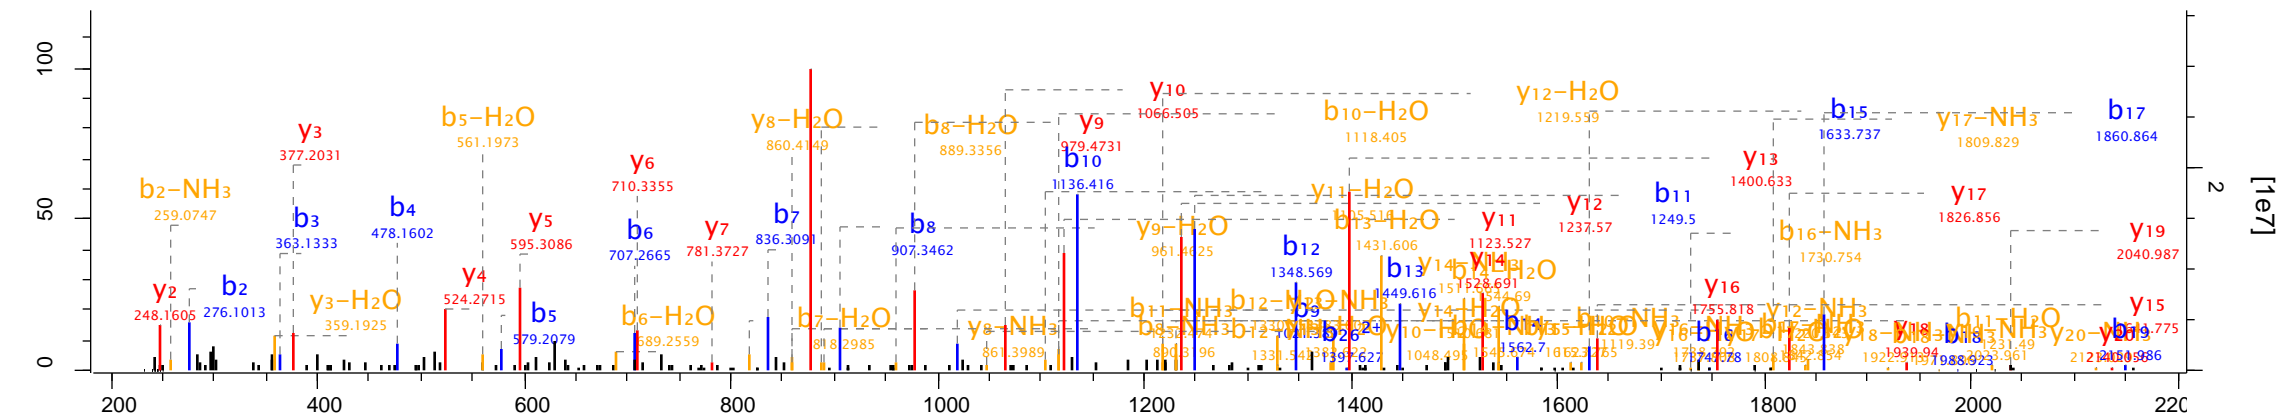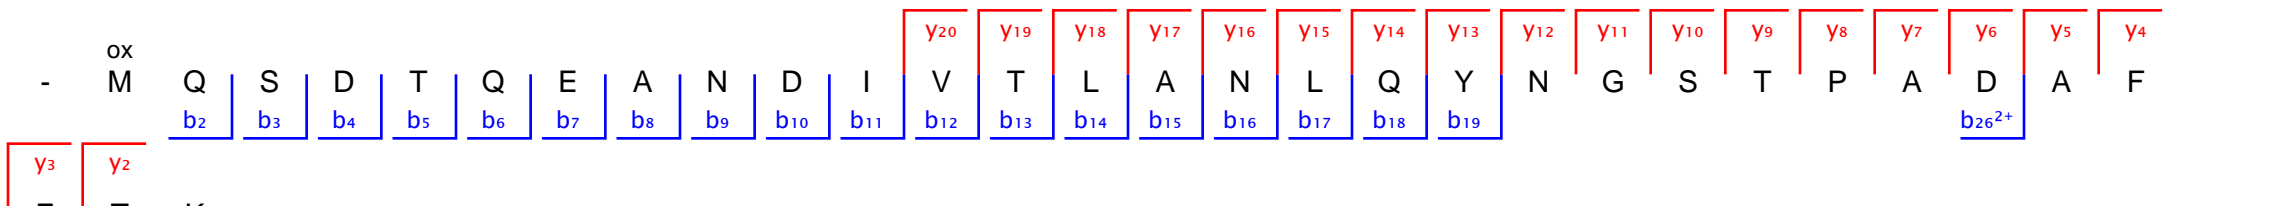

Raw file

Scan

Method

Score

m/z

Gene names

20140602\_QEp4\_FaHo\_SA\_GFP\_01

10112

FTMS; HCD

127.64

985.51

RPL13B

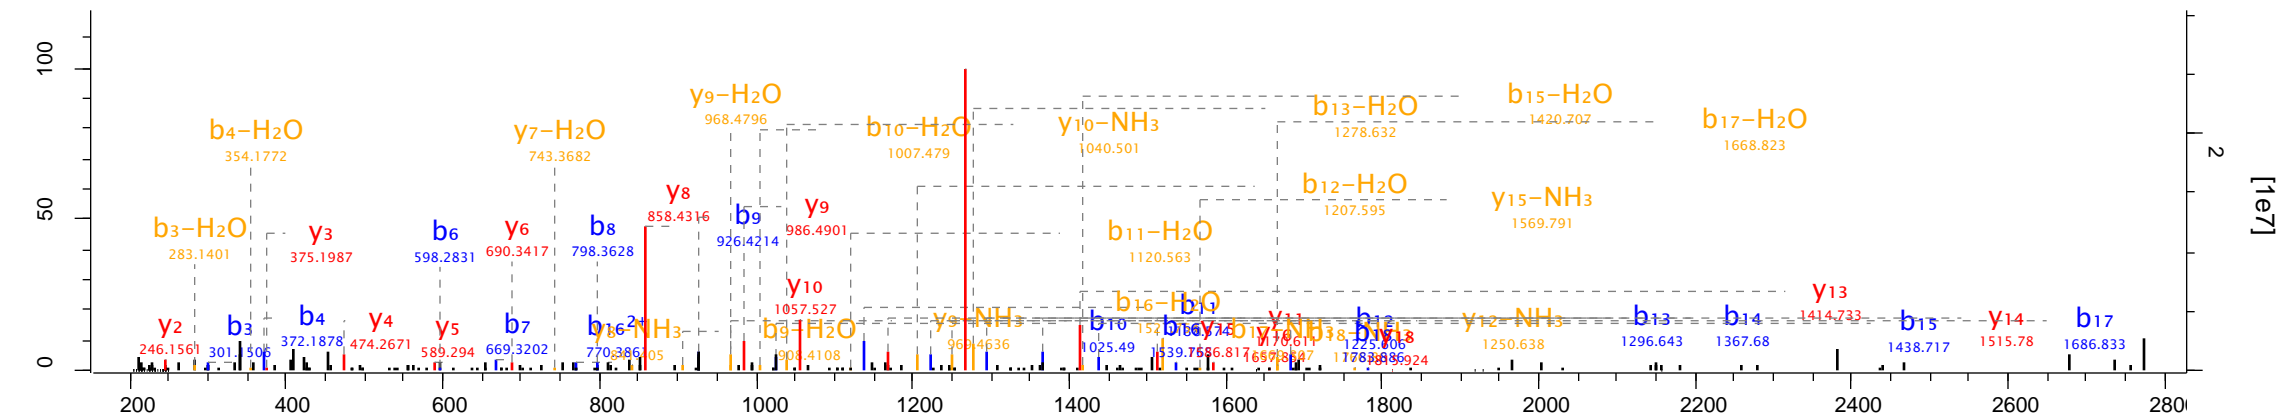

- D G K A P E A E Q V L S A A A T F P I A Q P A T D V E A

b<sub>3</sub> b<sub>4</sub> b<sub>6</sub> b<sub>7</sub> b<sub>8</sub> b<sub>9</sub> b<sub>10</sub> b<sub>11</sub> b<sub>12</sub> b<sub>13</sub> b<sub>14</sub> b<sub>15</sub> b<sub>16</sub> b<sub>17</sub> b<sub>18</sub> y<sub>18</sub> y<sub>16</sub> y<sub>15</sub> y<sub>14</sub> y<sub>13</sub> y<sub>12</sub> y<sub>11</sub> y<sub>10</sub> y<sub>9</sub> y<sub>8</sub> y<sub>6</sub> y<sub>5</sub> y<sub>4</sub> y<sub>3</sub> y<sub>2</sub>

| Raw file                     | Scan | Method    | Score  | m/z    | Gene names    |
|------------------------------|------|-----------|--------|--------|---------------|
| 20140602_QEp4_FaHo_SA_GFP_02 | 3638 | FTMS; HCD | 157.99 | 482.76 | RPL13B;RPL13A |

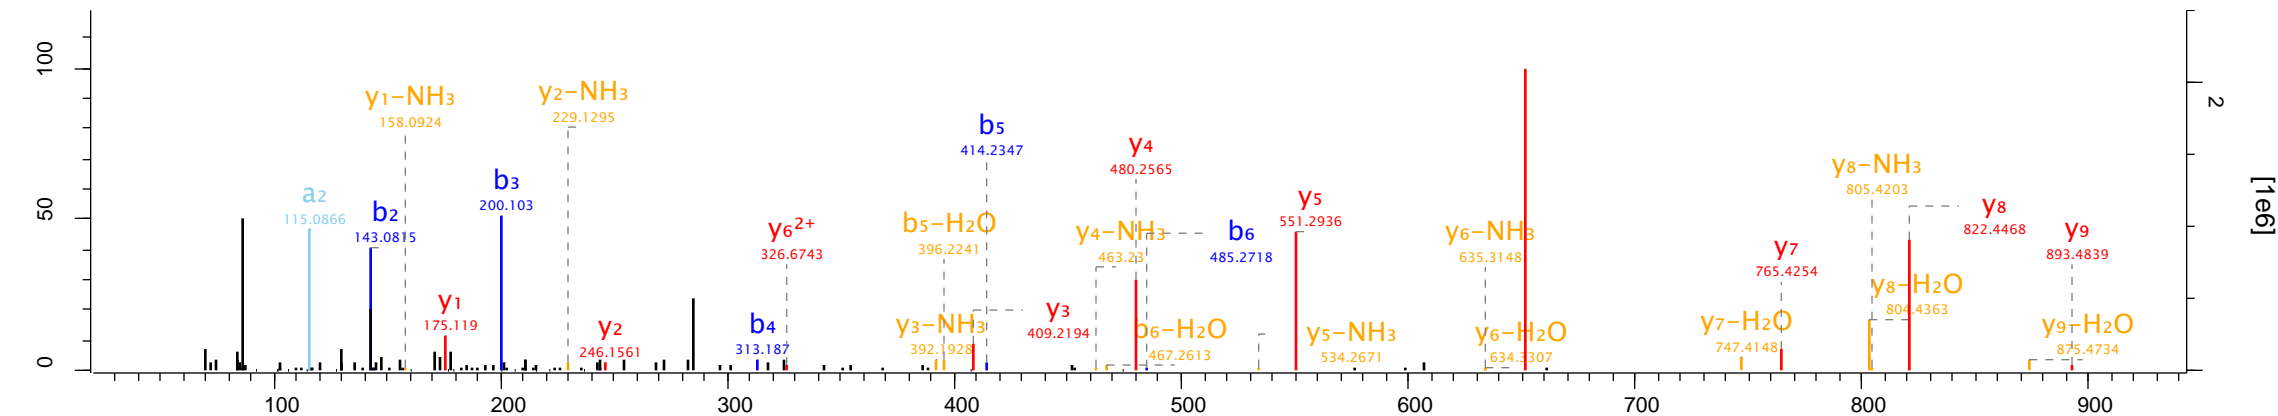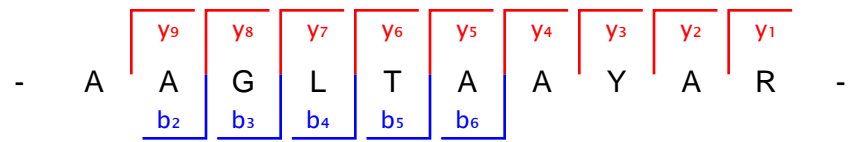

Raw file 20140602\_QEp4\_FaHo\_SA\_GFP\_02 Scan 4003 Method FTMS; HCD Score 197.36 m/z 708.35 Gene names RPS14B;RPS14A

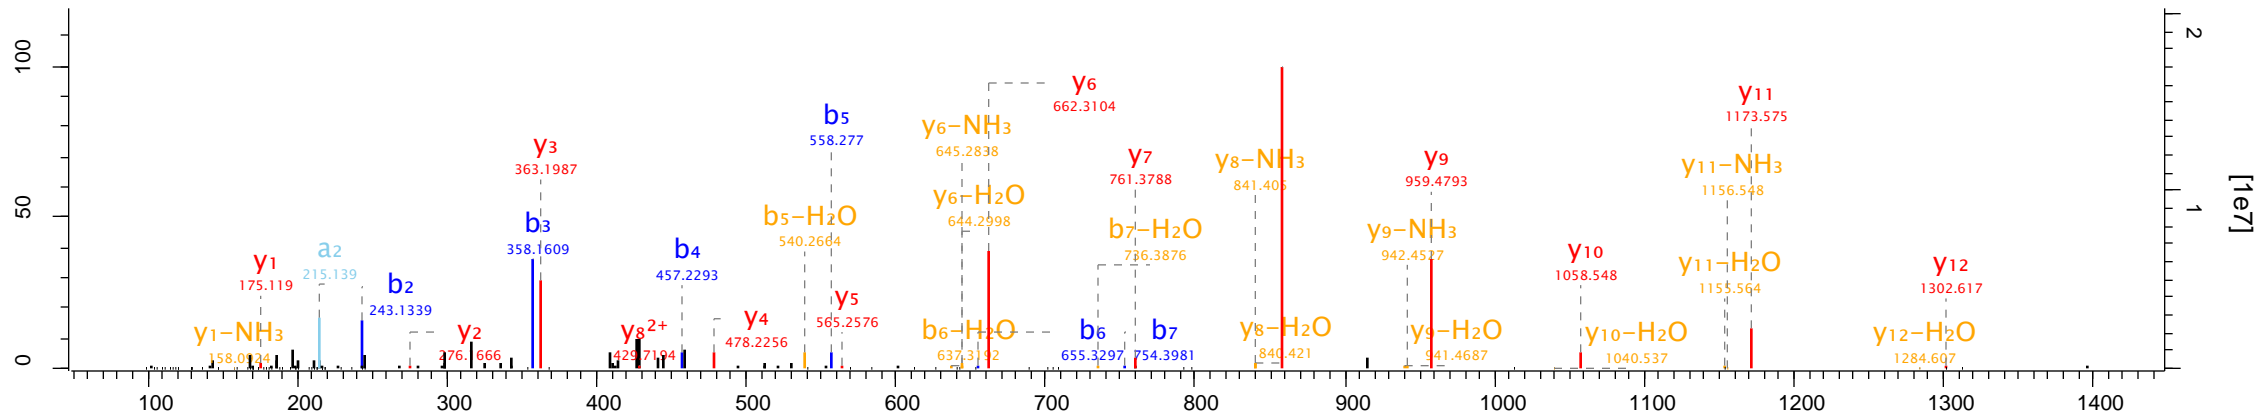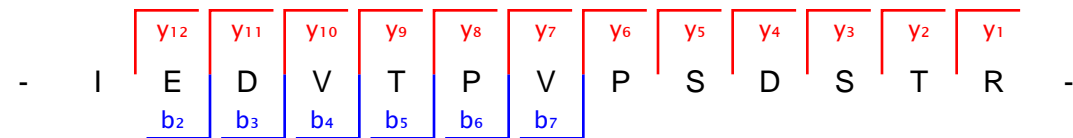

Raw file

Scan Method

Score m/z

Gene names

20140602\_QEp4\_FaHo\_SA\_HDA11475 FTMS; 74.84 464.7! TY2B-C;TY2B-B;TY2B-GR2;TY2B-F;TY2B-GR1;TY2A-GR1;TY2B-OR1;TY2A-DR2;TY2B-DR1;TY2B-DR3;TY2B-LR1;TY2B-OR2;TY2A-OR1;TY2A-LR2;TY2A-OR2;

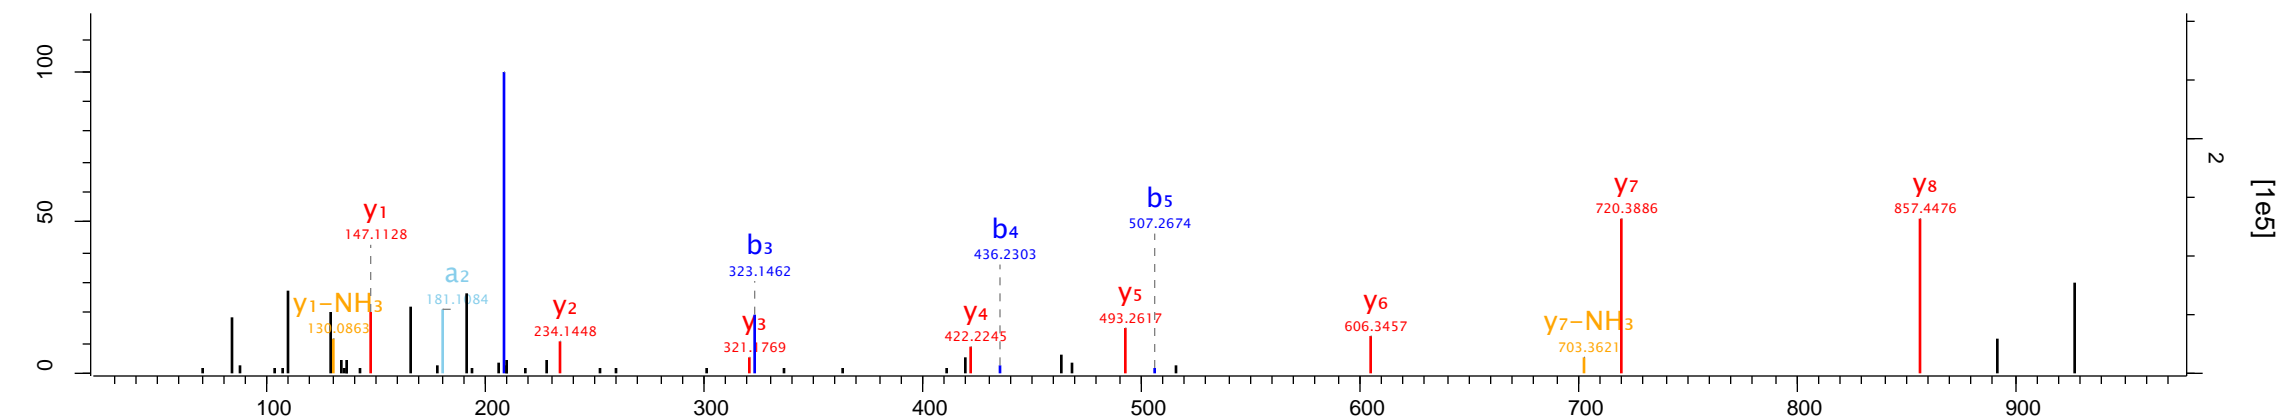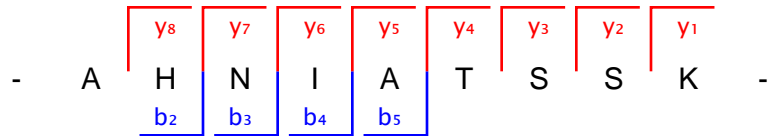

| Raw file                      | Scan | Method    | Score | m/z    | Gene names |
|-------------------------------|------|-----------|-------|--------|------------|
| 20140602_QEp4_FaHo_SA_HDA1_03 | 7657 | FTMS; HCD | 87.18 | 624.36 | ATP5       |

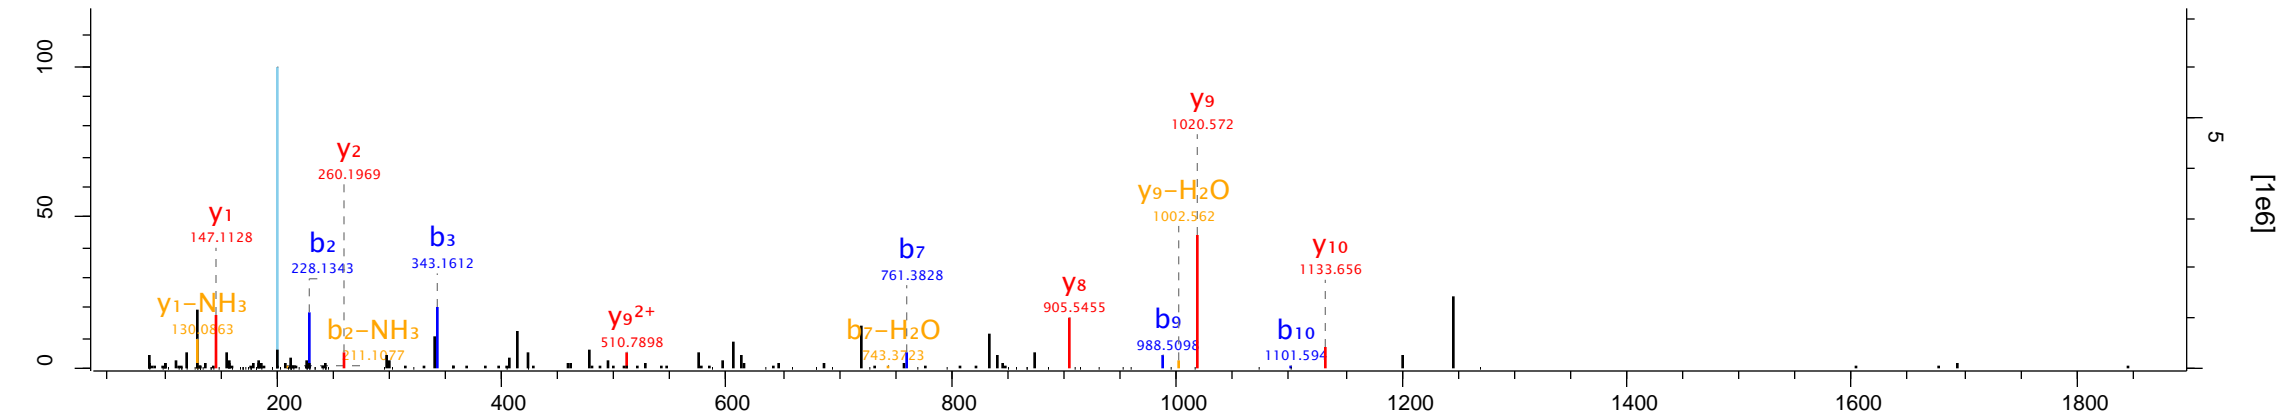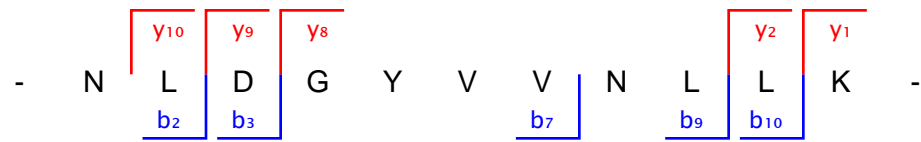



20140602\_QEp4\_Fal9L1 D 12J( 5S3 TY1B-ML1;TY1B-BR;TY1B-H;TY1B-MR2;TY1B-OR;TY1B-DR1;TY1B-NL2;TY1B-PR2;TY1B-DR5;TY1B-PR1;TY1B-JR2;TY1B-NL1;TY2B-C;TY1B-OL;TY1B-LR4;TY1B-ML2;TY1B-DR3;TY1

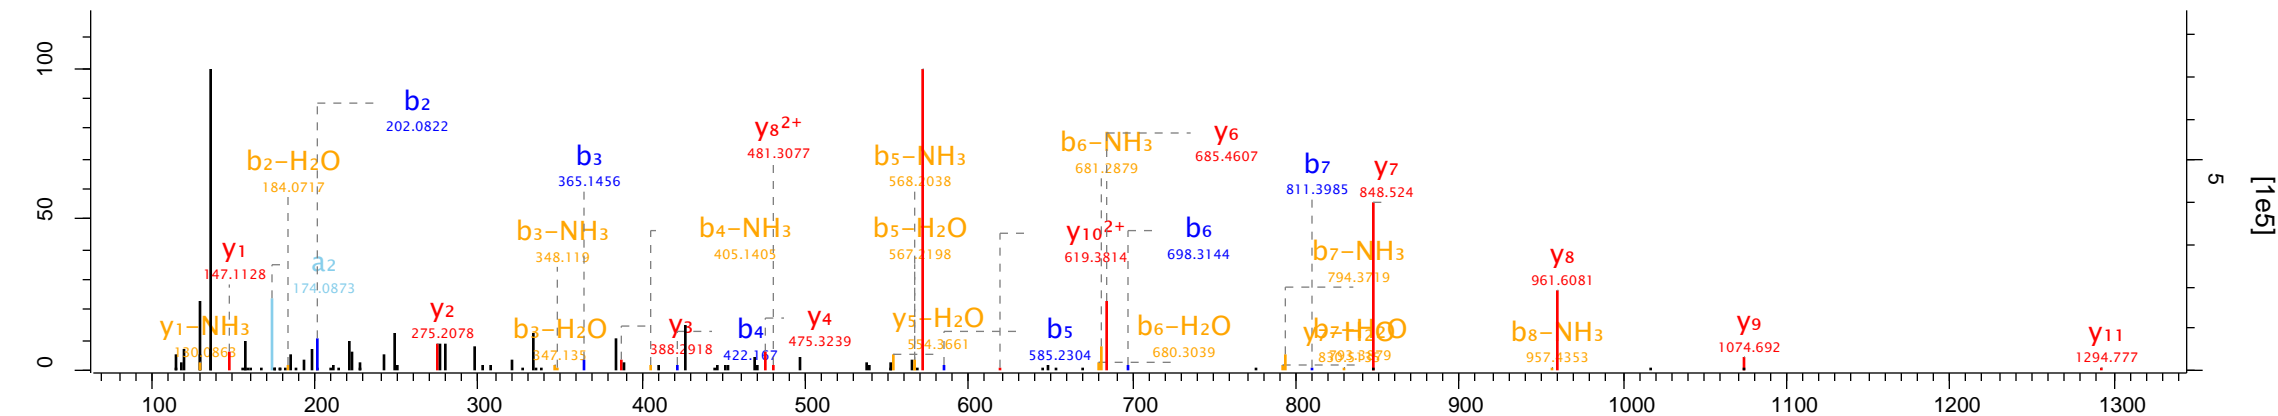

- N S Y G Y I I Y L P S L K K -

Fragmentation scheme showing amino acid residues and their corresponding b and y ions:

- b<sub>2</sub> (S)
- b<sub>3</sub> (Y)
- b<sub>4</sub> (G)
- b<sub>5</sub> (Y)
- b<sub>6</sub> (I)
- b<sub>7</sub> (I)
- y<sub>1</sub> (K)
- y<sub>2</sub> (K)
- y<sub>3</sub> (L)
- y<sub>4</sub> (S)
- y<sub>5</sub> (P)
- y<sub>6</sub> (L)
- y<sub>7</sub> (Y)
- y<sub>8</sub> (I)
- y<sub>9</sub> (I)
- y<sub>10</sub><sup>2+</sup> (Y)
- y<sub>11</sub> (G)

| Raw file                      | Scan | Method    | Score | m/z   | Gene names |
|-------------------------------|------|-----------|-------|-------|------------|
| 20140602_QEp4_FaHo_SA_HDA2_01 | 5949 | FTMS; HCD | 94.47 | 545.3 | ARF1;ARF2  |

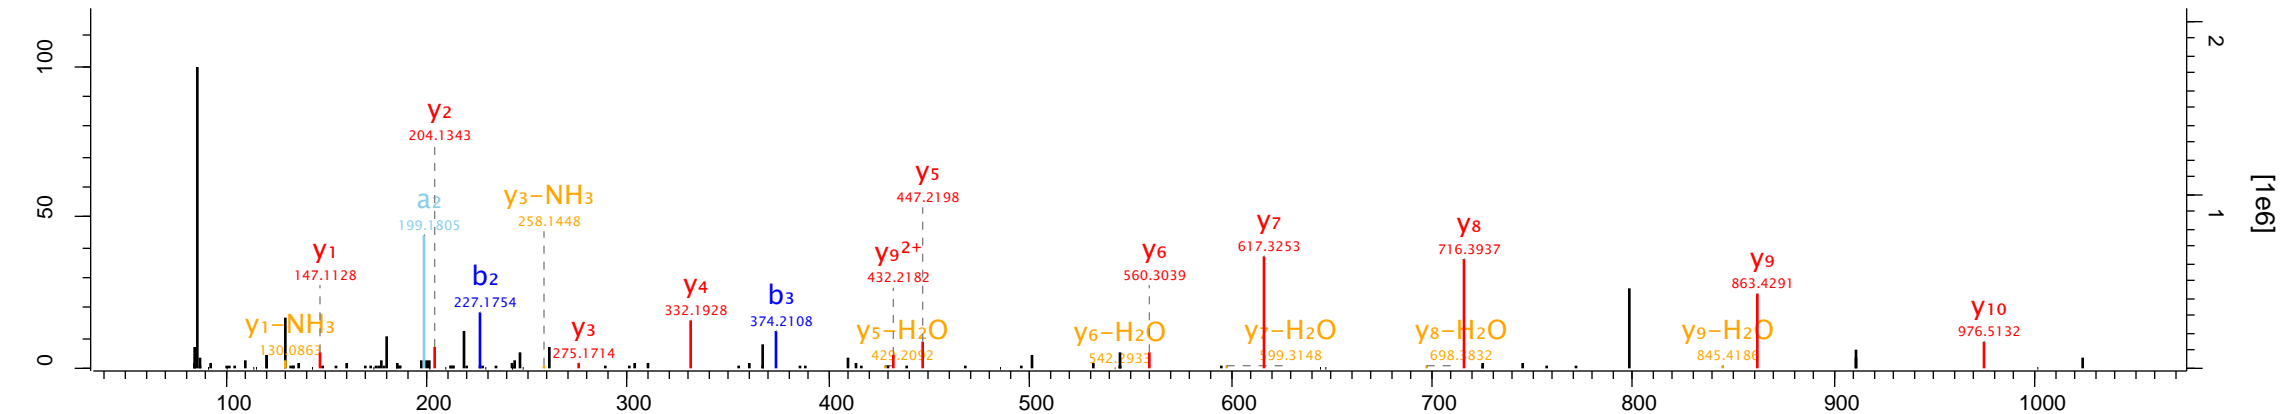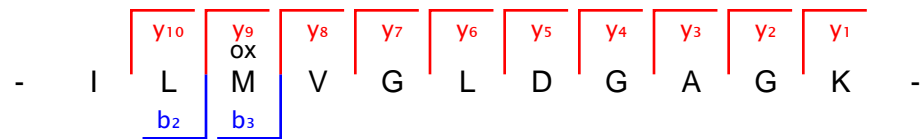

| Raw file                      | Scan | Method    | Score | m/z    | Gene names |
|-------------------------------|------|-----------|-------|--------|------------|
| 20140602_QEp4_FaHo_SA_HDA2_02 | 5927 | FTMS; HCD | 55.45 | 757.04 | HXT6;HXT7  |

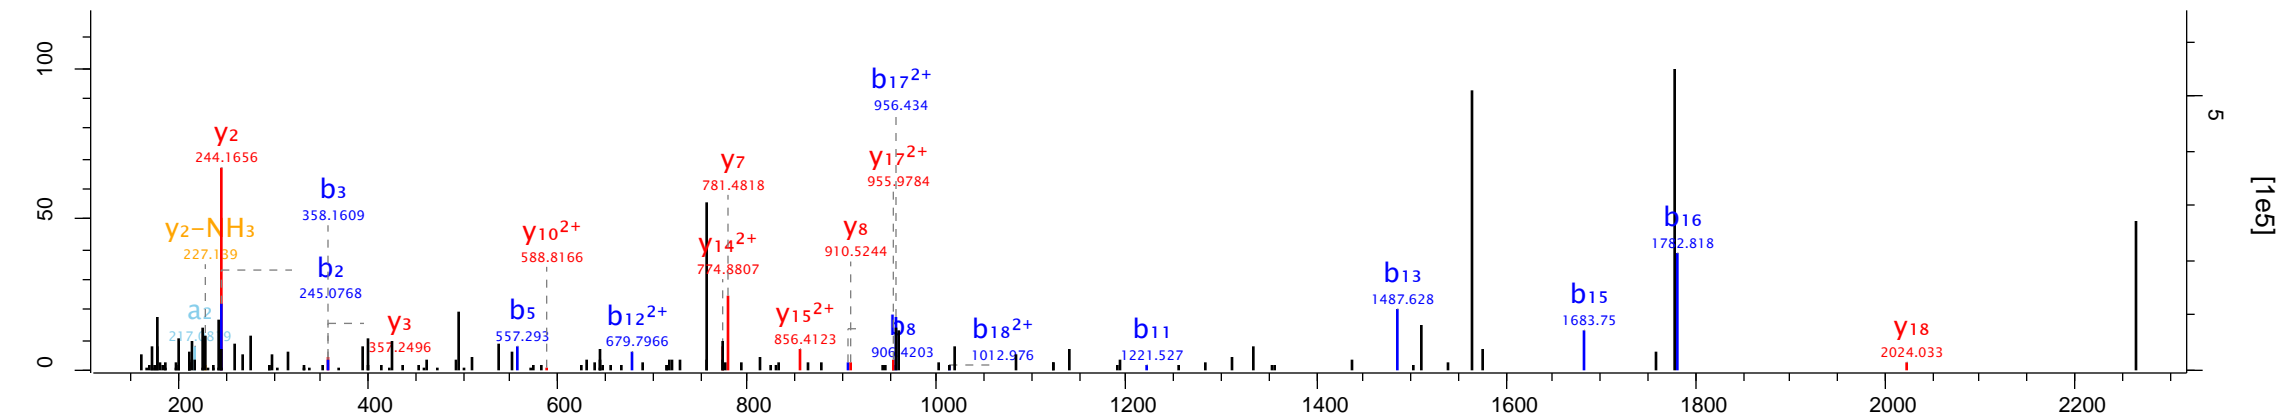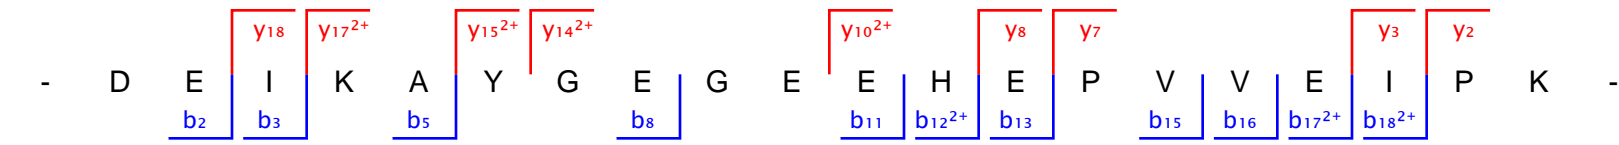

Raw file Scan Method Score m/z Gene names

20140602\_QEp4\_FaHo\_SA\_HDA2\_02 7570 FTMS; HCD 209.36 919.7 HXT6;HXT7

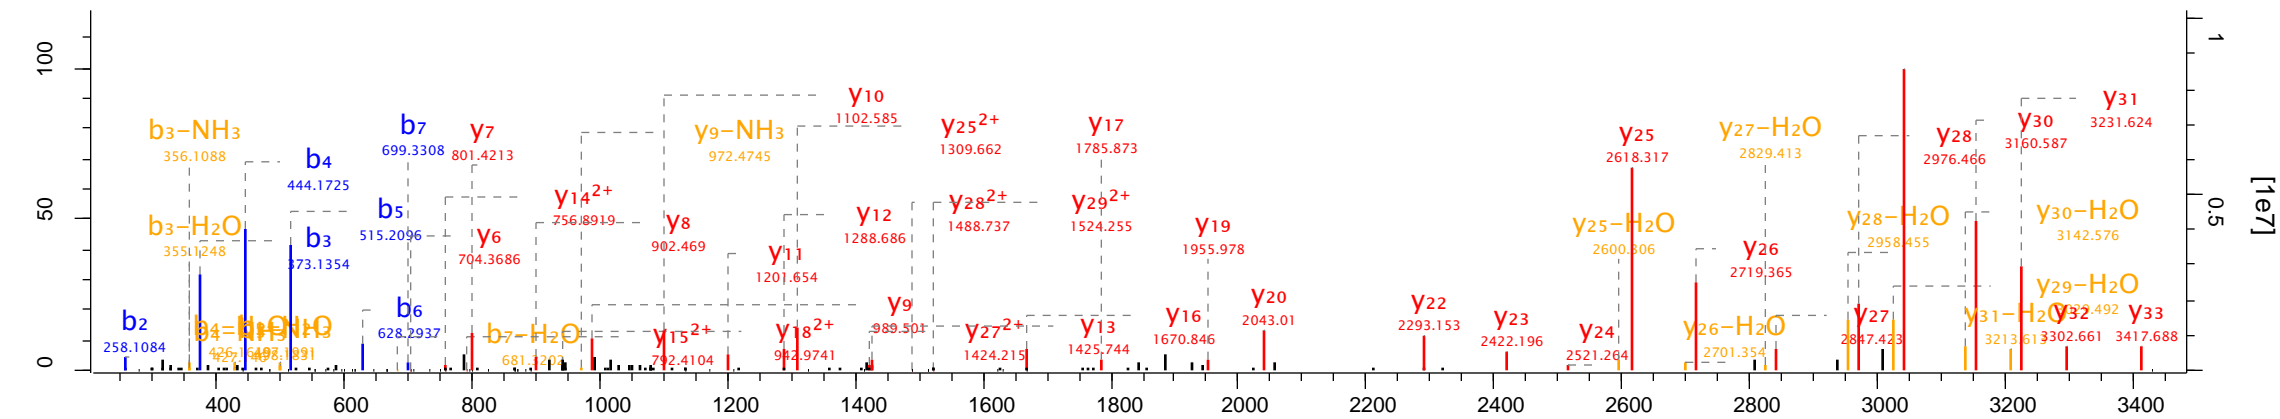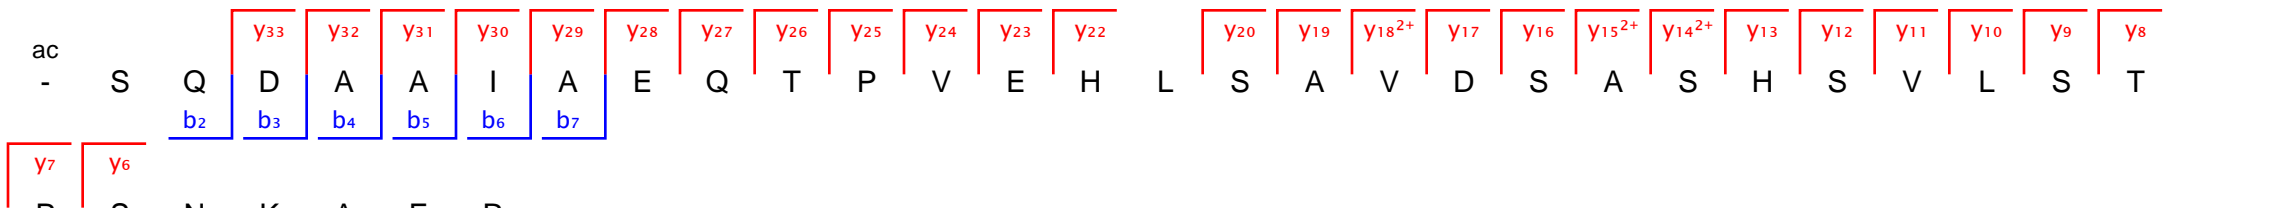

20140602\_QEp4\_FaH 861 FTMS 144 714 TY1B-ML1;TY1B-BR;TY1A-PR1;TY1A-A;TY1A-DR4;TY1B-H;TY1B-MR2;TY1B-OR;TY1B-DR1;TY1B-NL2;TY1B-PR2;TY1B-DR5;TY1B-PR1;TY1B-JR2;TY1A-PL;TY1A-LR2;TY1A-ER1;TY

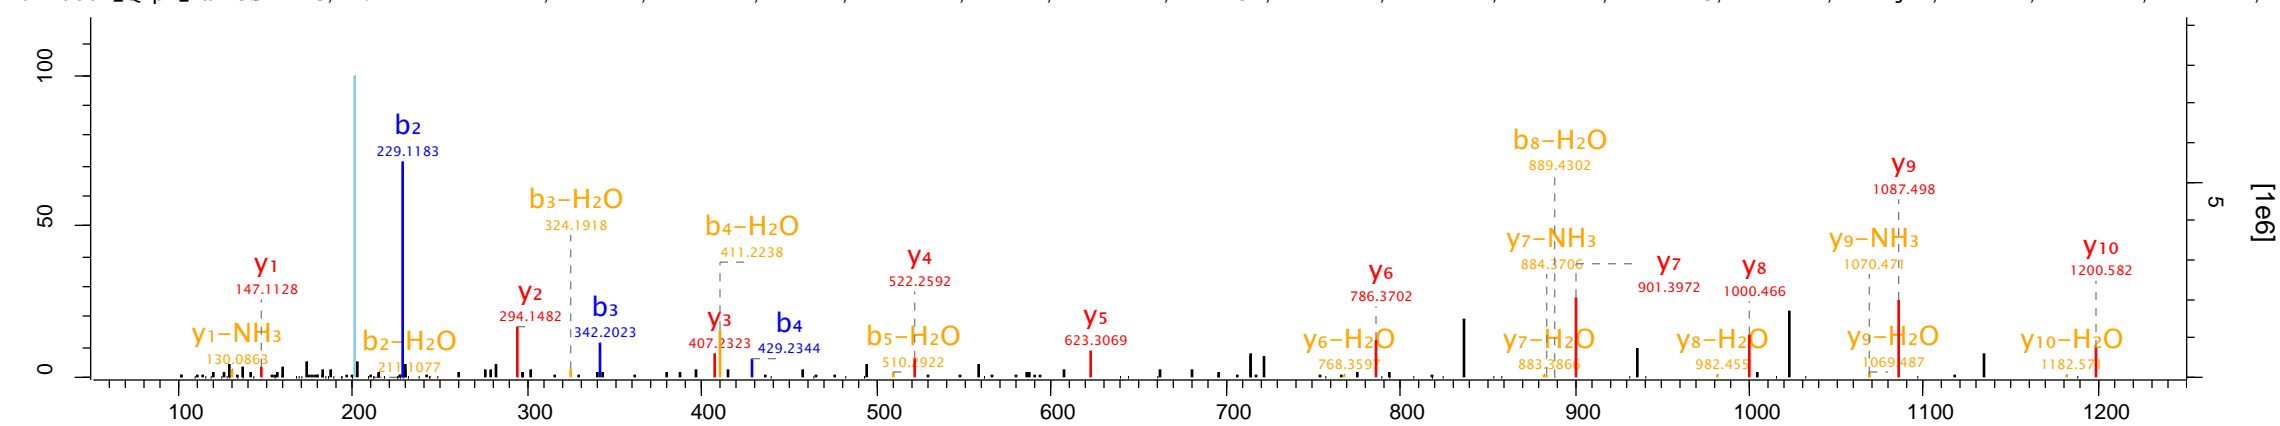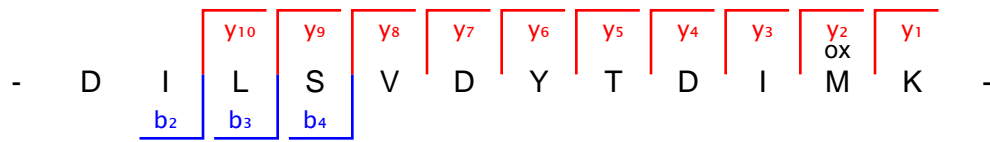

Raw file Scan Method Score m/z Gene names

20140602\_QEp4\_FaHo\_SA\_HDA2\_02 9702 FTMS; HCD 143.28 675.02 VTC2

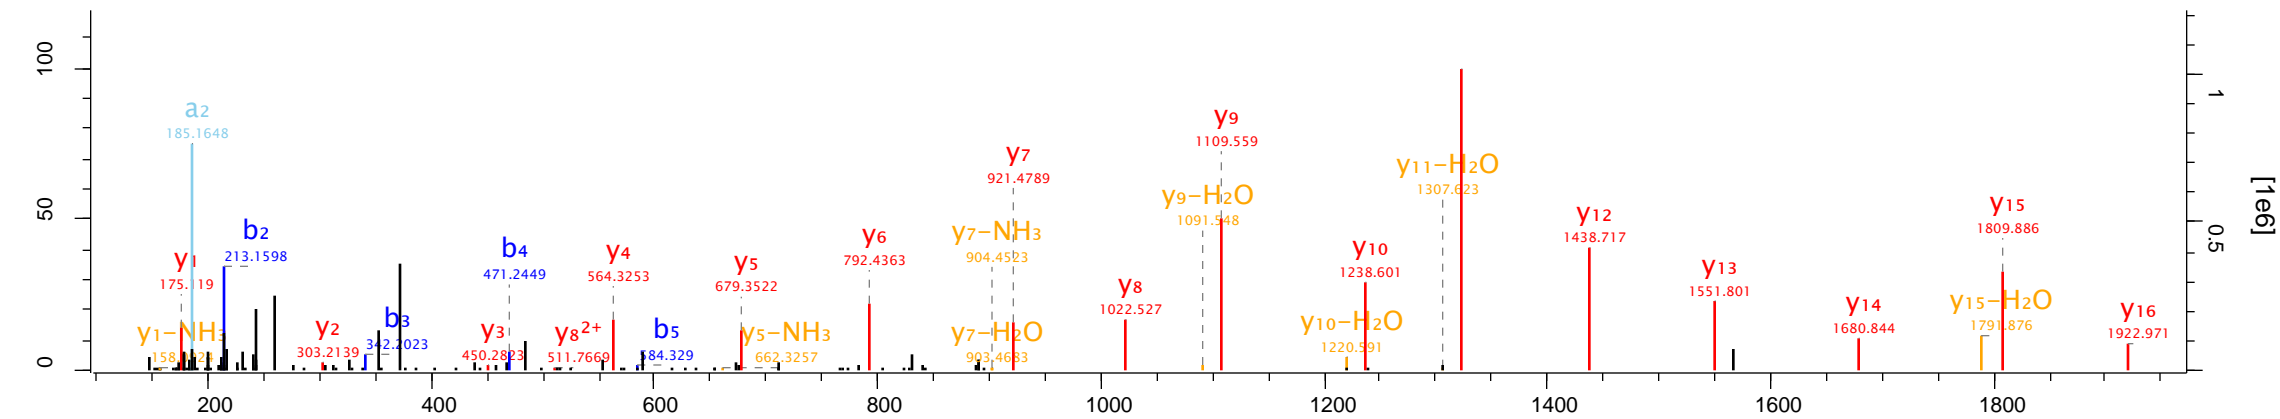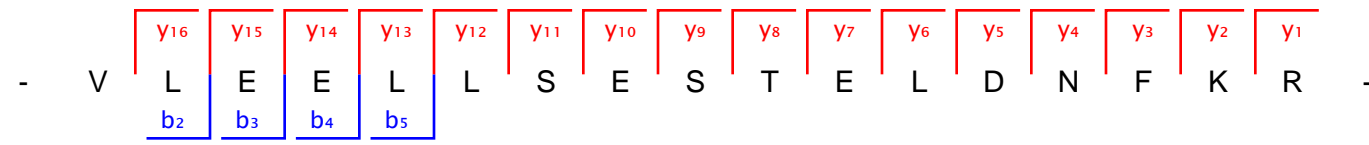

Raw file Scan Method Score m/z Gene names

20140602\_QEp4\_FaHo\_SA\_HDA2\_03 1947 FTMS; HCD 118.74 430.73 HXT6;HXT7

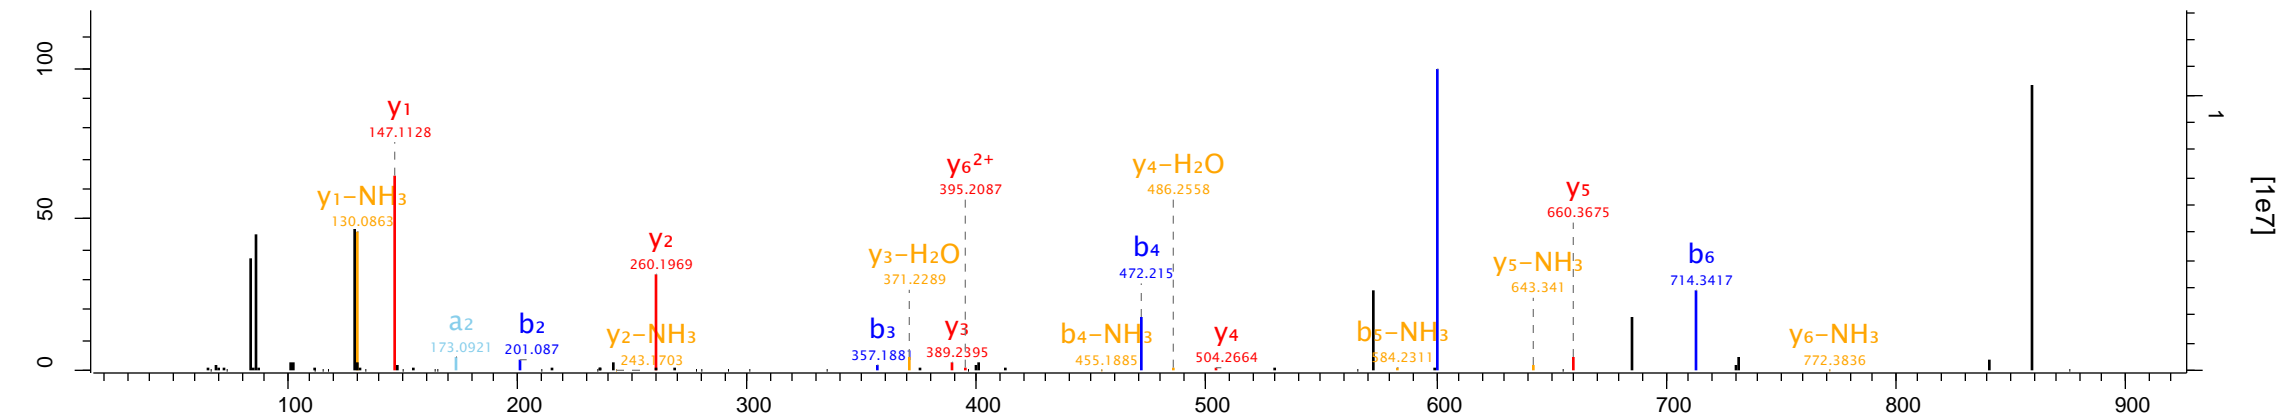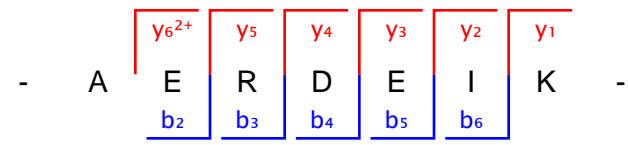

Raw file Scan Method Score m/z Gene names

20140602\_QEp4\_FaHo\_SA\_HDA2\_03 2338 FTMS; HCD 111.65 359.71 HXT6;HXT7

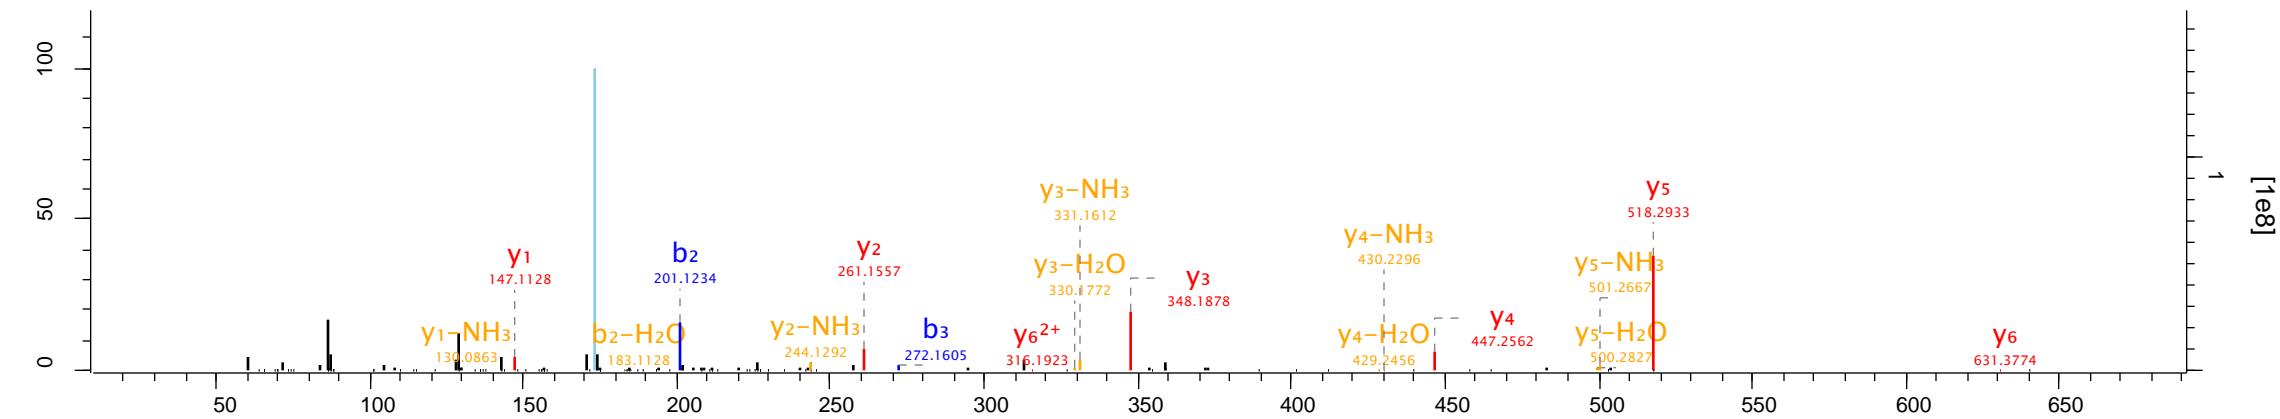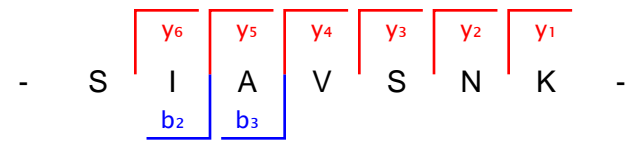



| Raw file                      | Scan | Method    | Score | m/z    | Gene names  |
|-------------------------------|------|-----------|-------|--------|-------------|
| 20140602_QEp4_FaHo_SA_HDA2_03 | 2819 | FTMS; HCD | 84.23 | 411.23 | RPL9A;RPL9B |

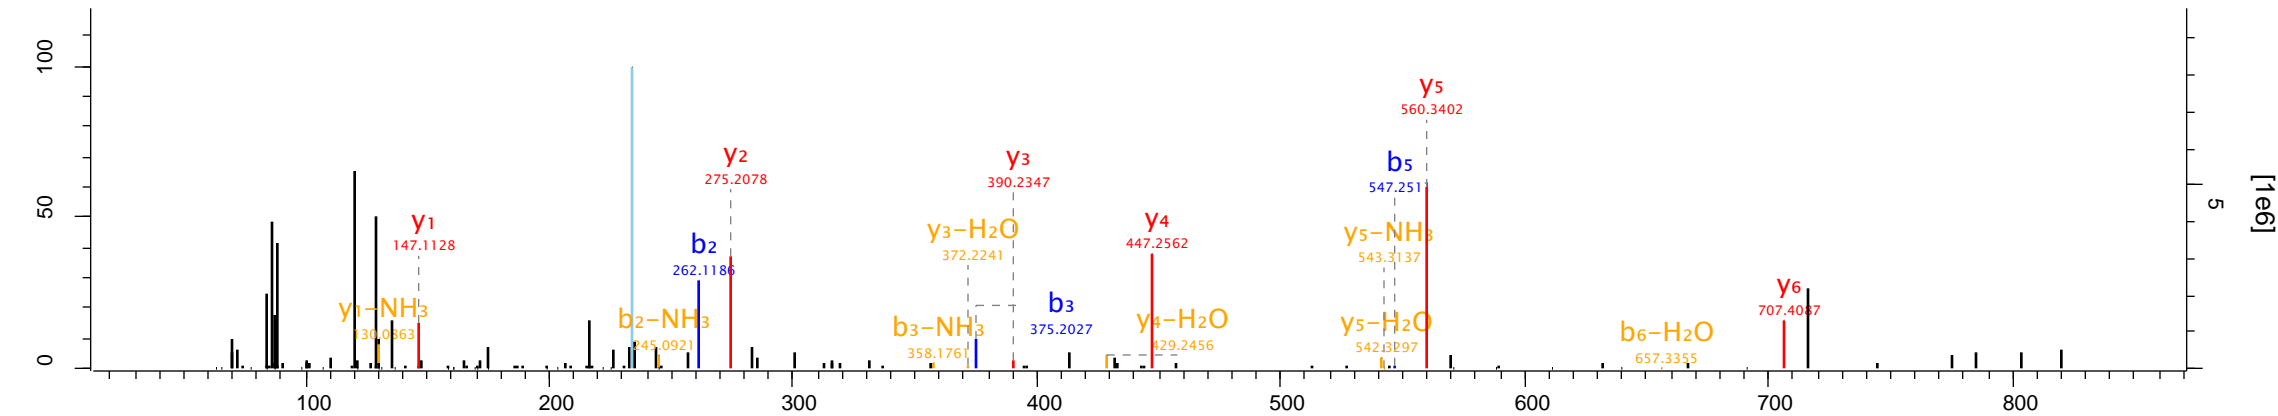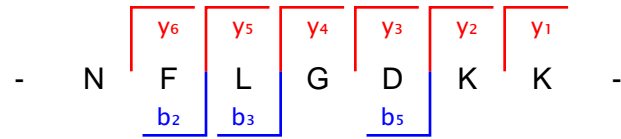

Raw file Scan Method Score m/z Gene names

20140602\_QEp4\_FaHo\_SA\_HDA2\_03 3197 FTMS; HCD 195.79 492.28 CMD1

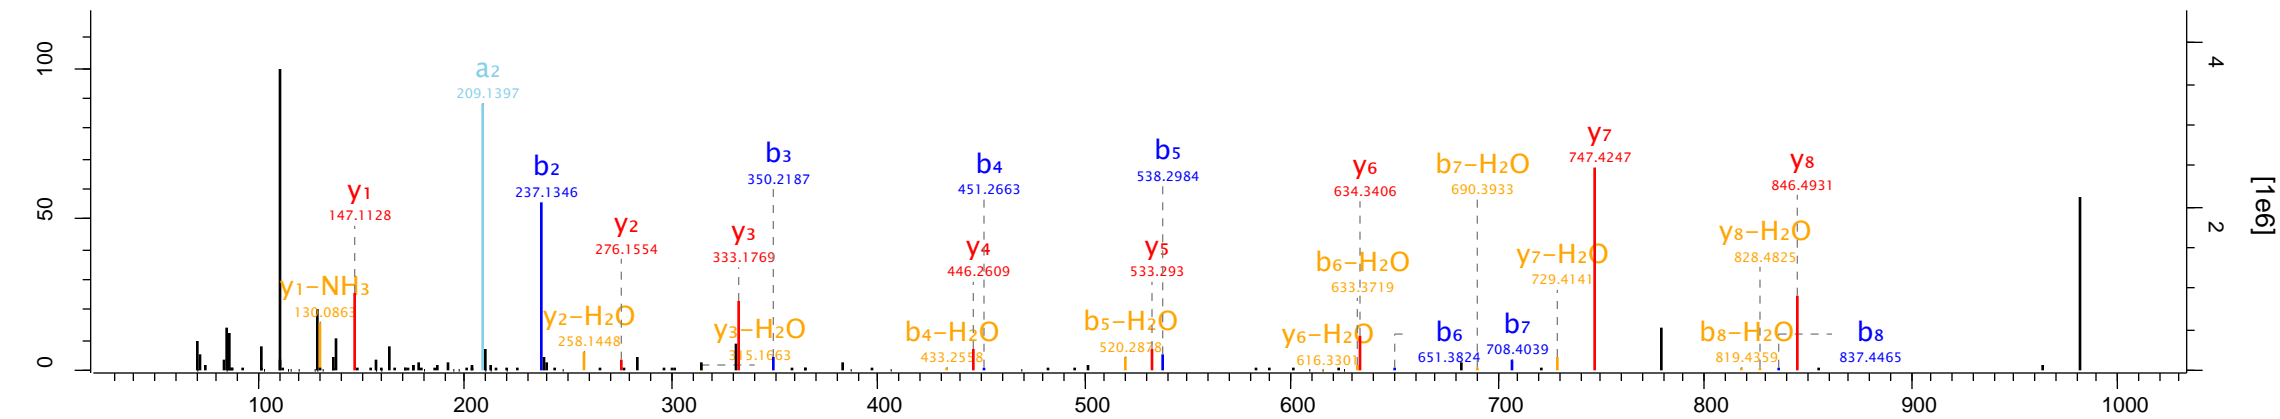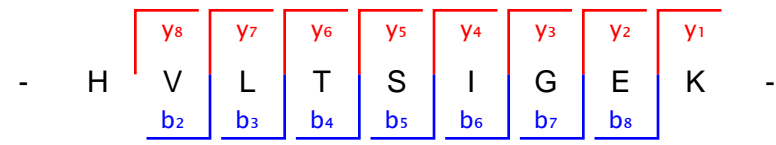

| Raw file                      | Scan | Method    | Score  | m/z    | Gene names |
|-------------------------------|------|-----------|--------|--------|------------|
| 20140602_QEp4_FaHo_SA_HDA2_03 | 3305 | FTMS; HCD | 125.47 | 449.22 | HXT6;HXT7  |

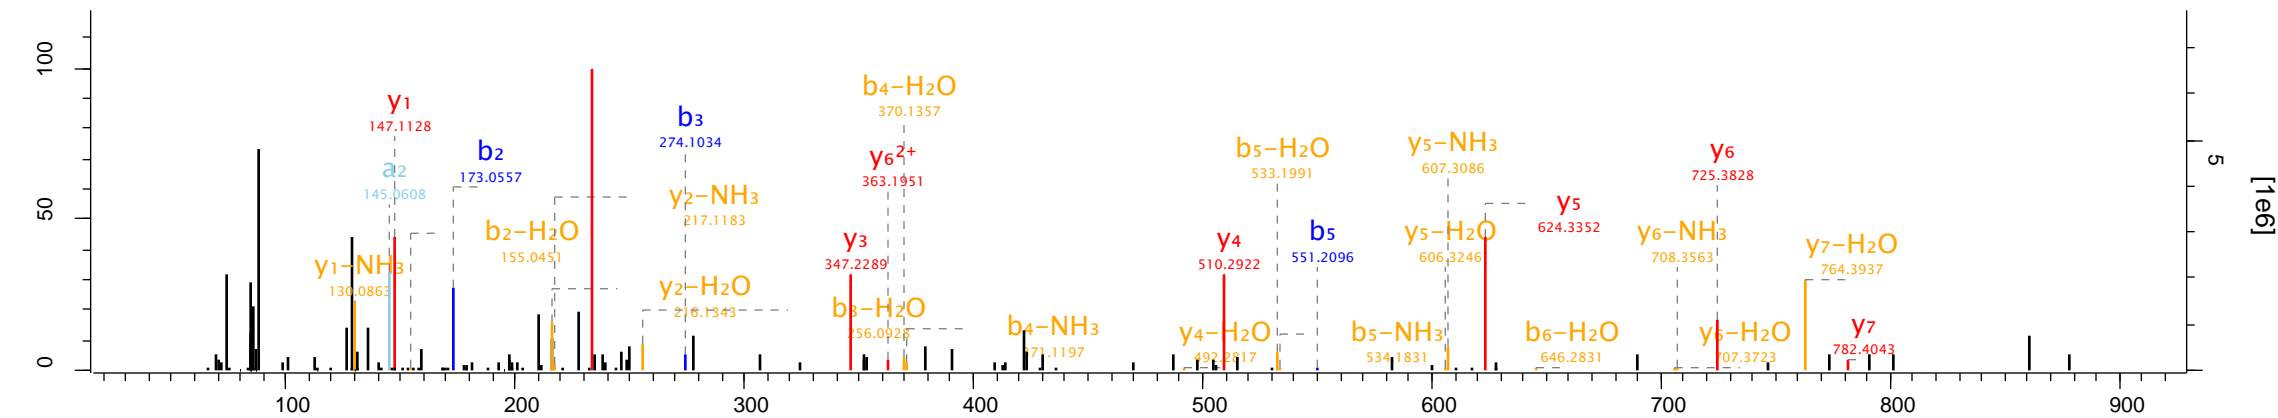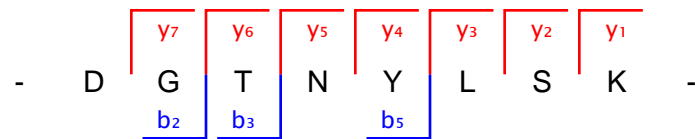

| Raw file                      | Scan | Method    | Score | m/z    | Gene names |
|-------------------------------|------|-----------|-------|--------|------------|
| 20140602_QEp4_FaHo_SA_HDA2_03 | 3410 | FTMS; HCD | 85.36 | 390.22 | HXT6;HXT7  |

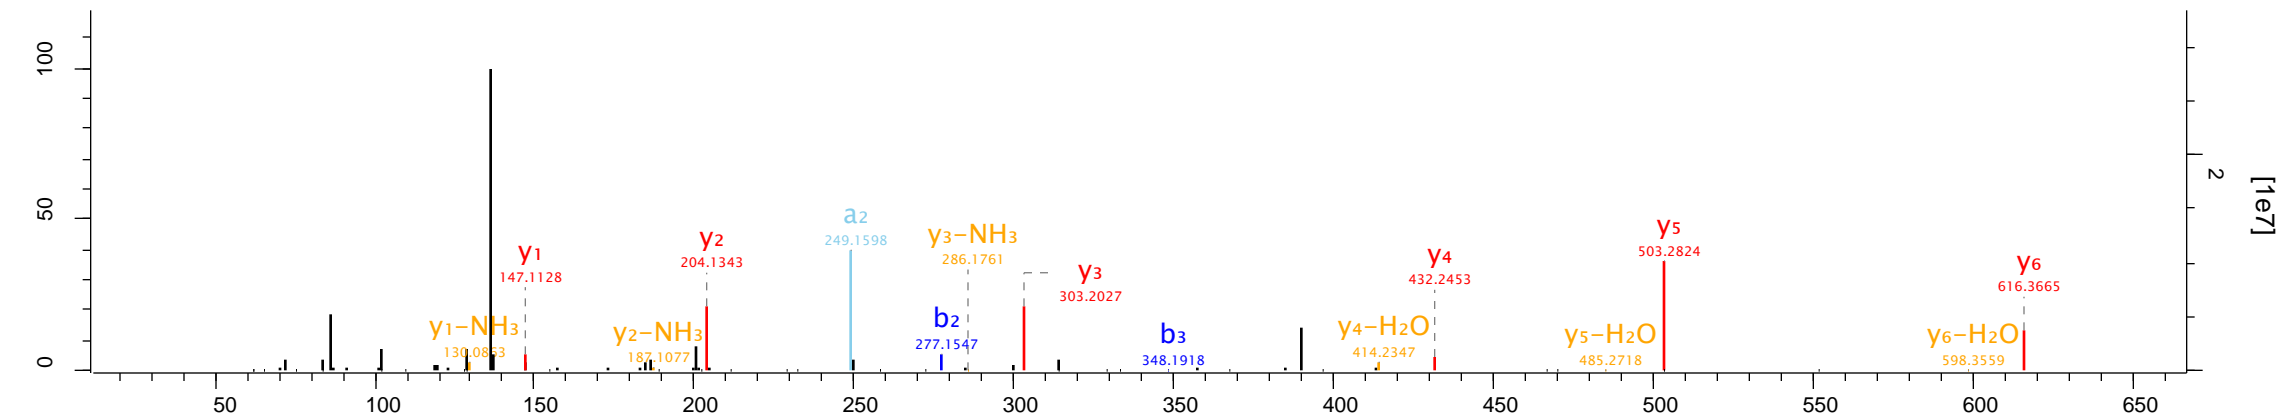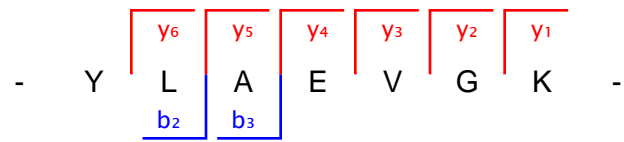

| Raw file                      | Scan | Method    | Score | m/z    | Gene names |
|-------------------------------|------|-----------|-------|--------|------------|
| 20140602_QEp4_FaHo_SA_HDA2_03 | 5308 | FTMS; HCD | 88.56 | 594.96 | HXT6;HXT7  |

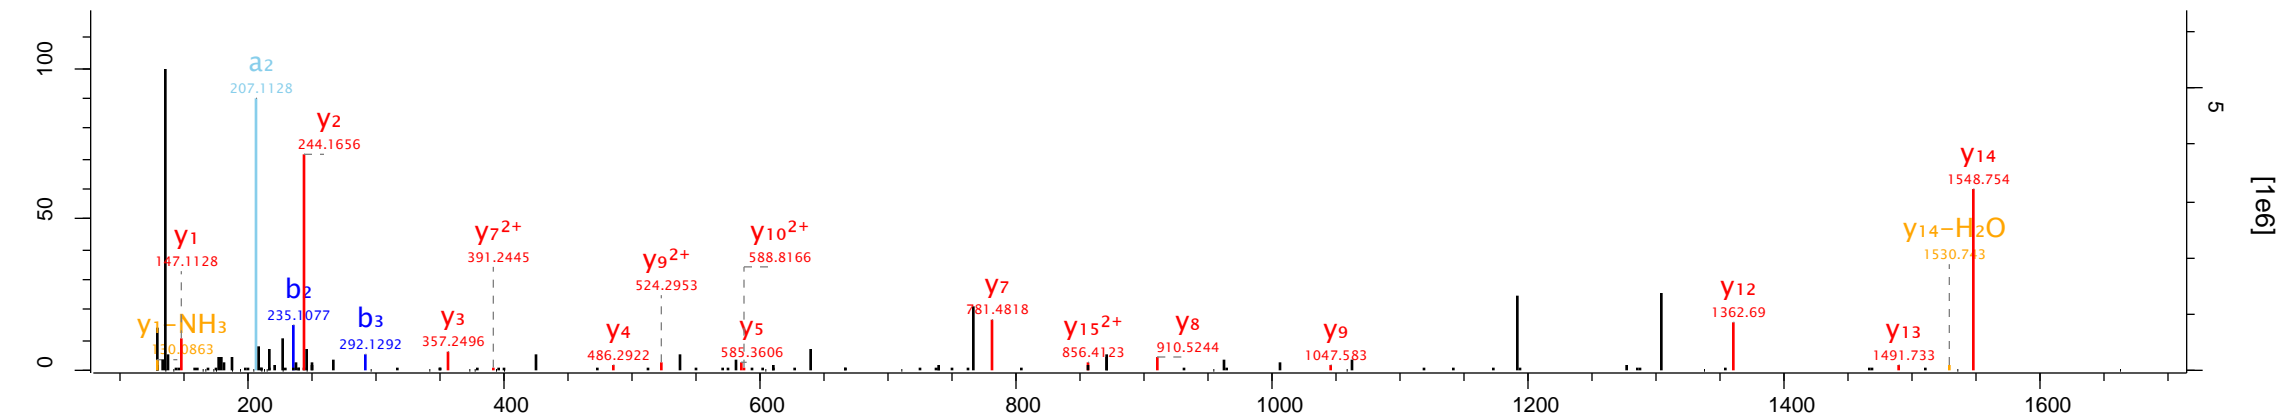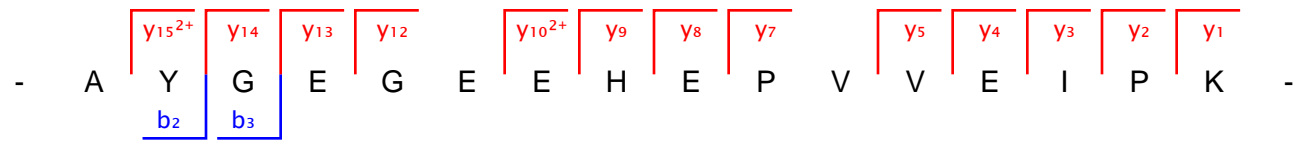

Raw file Scan Method Score m/z Gene names

20140602\_QEp4\_FaHo\_SA\_HDA2\_03 5821 FTMS; HCD 72.36 702 SHM1

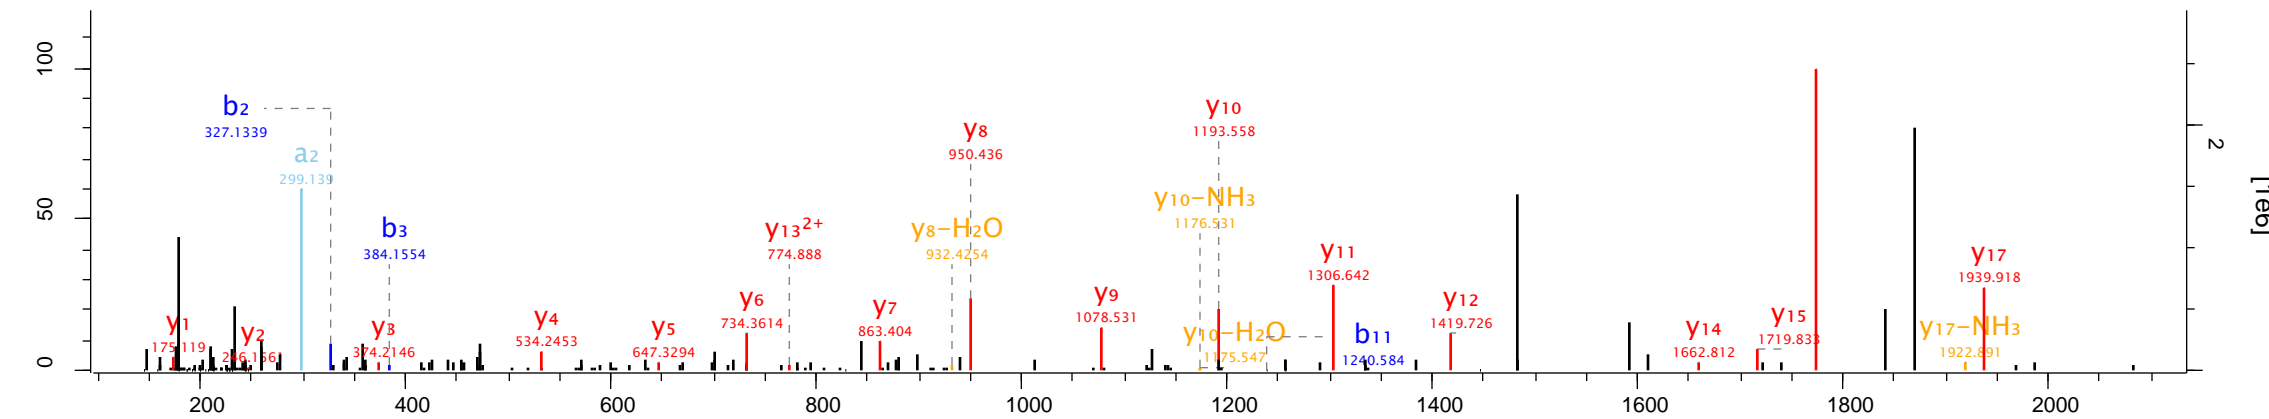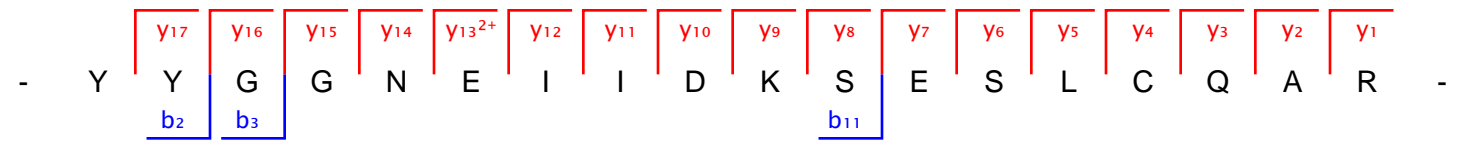

Raw file 20140602\_QEp4\_FaHo\_SA\_HDA2\_03 Scan 5869 Method FTMS; HCD Score 217.19 m/z 545.96 Gene names PST2

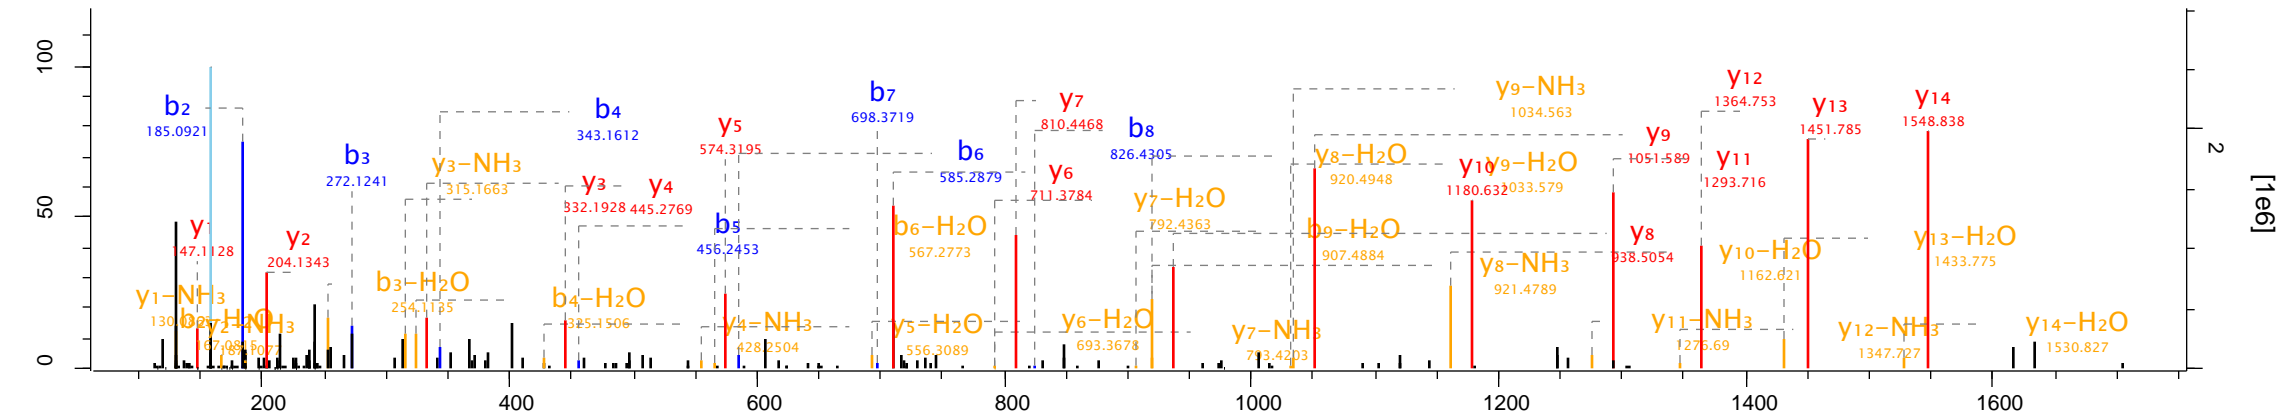

- S P S A L E L Q V H E I Q G K -

y14 y13 y12 y11 y10 y9 y8 y7 y6 y5 y4 y3 y2 y1  
b2 b3 b4 b5 b6 b7 b8

Raw file Scan Method Score m/z Gene names

20140602\_QEp4\_FaHo\_SA\_HDA2\_03 7364 FTMS; HCD 152.85 833.22 HXT6;HXT7

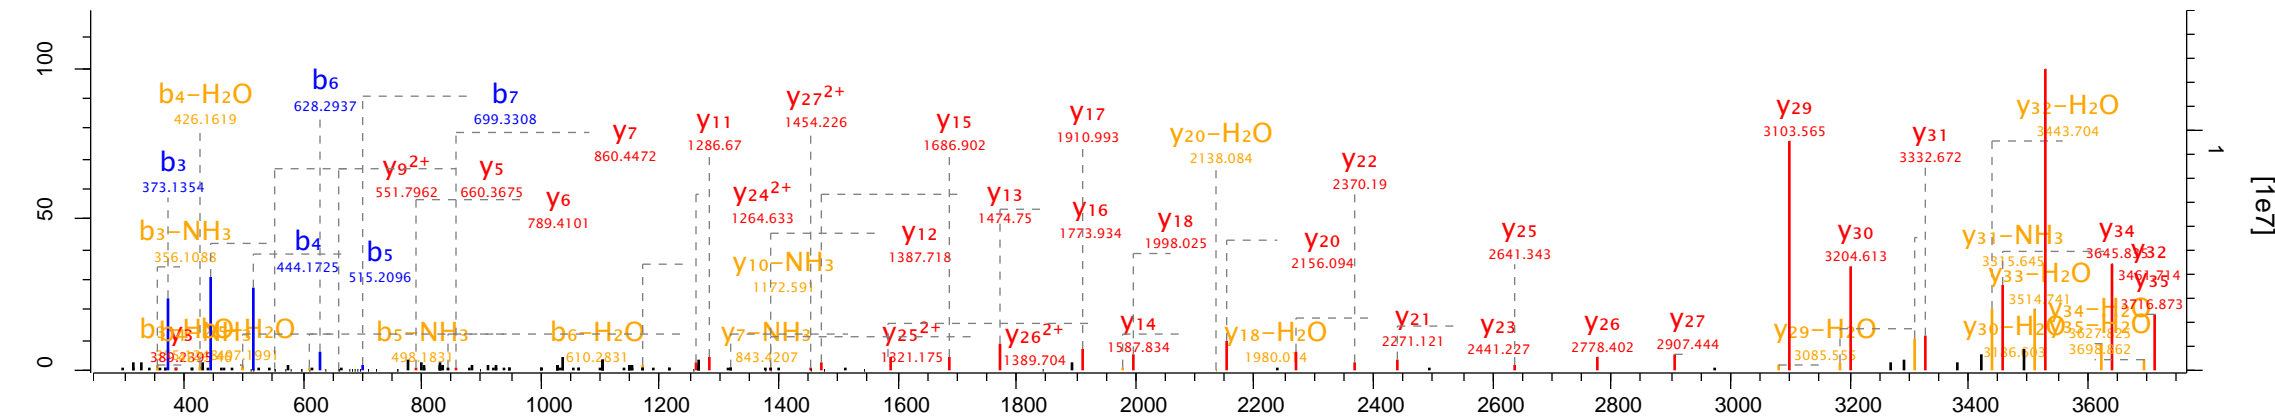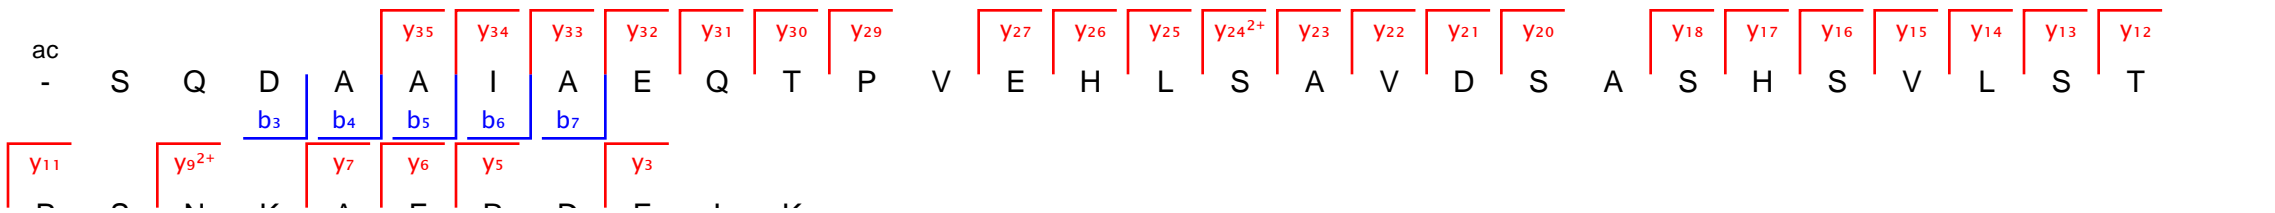





Raw file Scan Method Score m/z Gene names  
 20140602\_QEp4\_FaHo\_SA\_HDA2\_03 8909 FTMS; HCD 206.66 733.87 HXT6;HXT7

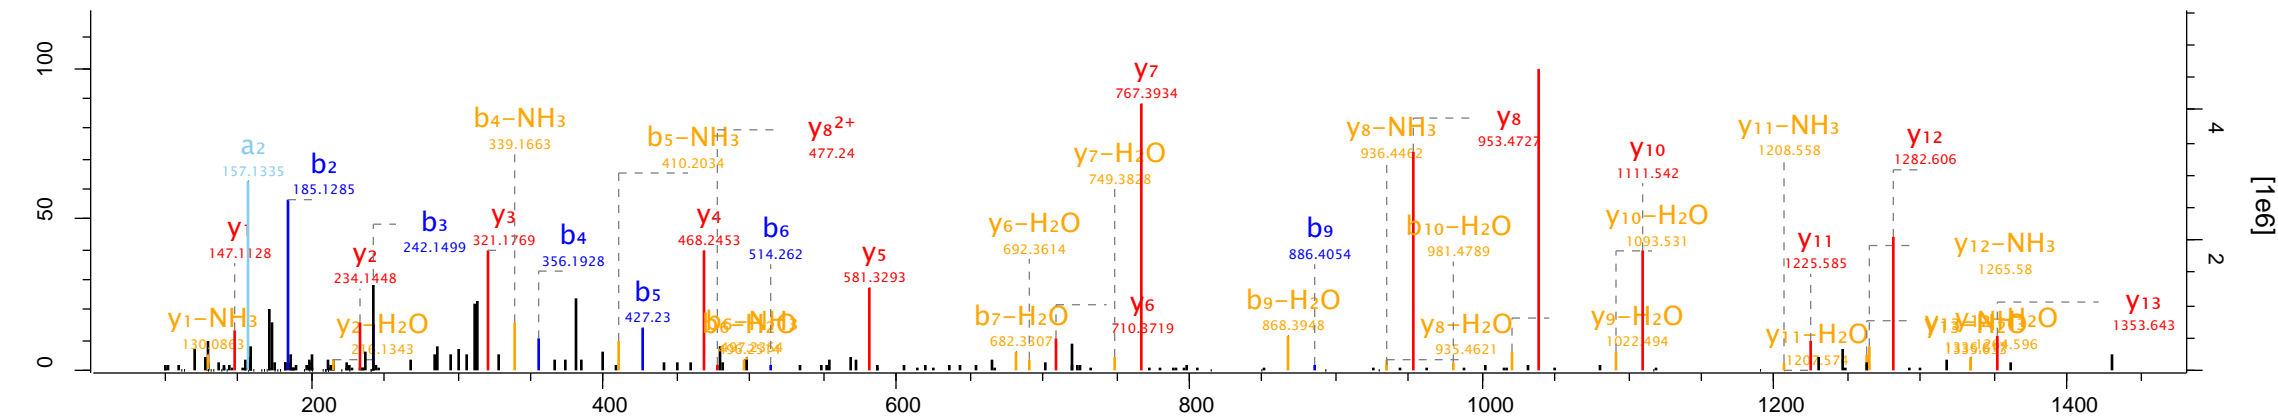

- L A G N A S W G E L F S S K -

Fragmentation mapping (b and y ions):

- b<sub>2</sub> (A), b<sub>3</sub> (AG), b<sub>4</sub> (AGN), b<sub>5</sub> (AGNA), b<sub>6</sub> (AGNAS), b<sub>9</sub> (E)
- y<sub>1</sub> (K), y<sub>2</sub> (SS), y<sub>3</sub> (SFS), y<sub>4</sub> (SFL), y<sub>5</sub> (SLE), y<sub>6</sub> (SEL), y<sub>7</sub> (SLEW), y<sub>8</sub> (SLEW), y<sub>9</sub> (SLEW), y<sub>10</sub> (SLEWA), y<sub>11</sub> (SLEWAN), y<sub>12</sub> (SLEWAG), y<sub>13</sub> (SLEWAGN)

| Raw file                      | Scan  | Method    | Score  | m/z    | Gene names  |
|-------------------------------|-------|-----------|--------|--------|-------------|
| 20140602_QEp4_FaHo_SA_HDA2_03 | 10020 | FTMS; HCD | 129.05 | 882.96 | RPS0B;RPS0A |

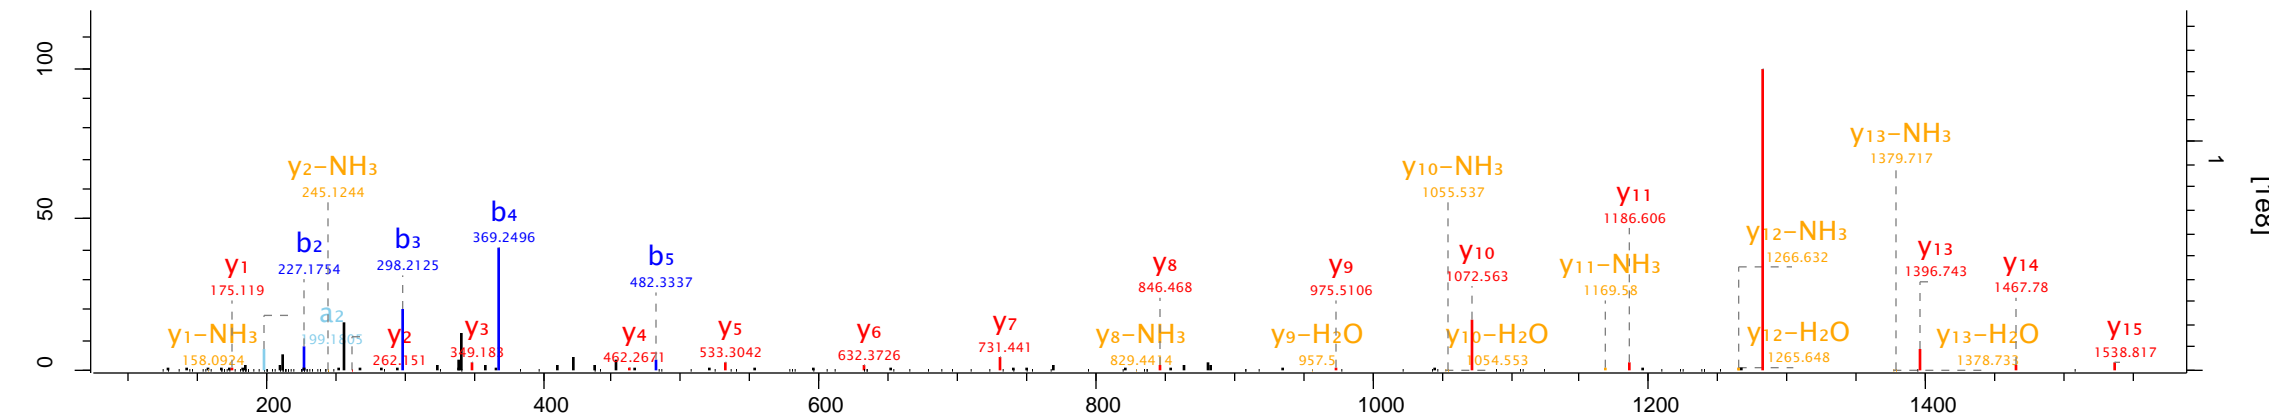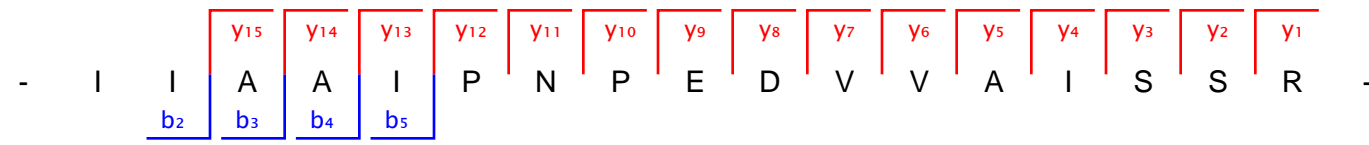

Raw file Scan Method Score m/z Gene names  
 20140602\_QEp4\_FaHo\_SA\_HDA2\_03 10198 FTMS; HCD 215.32 1156.11 HXT6;HXT7

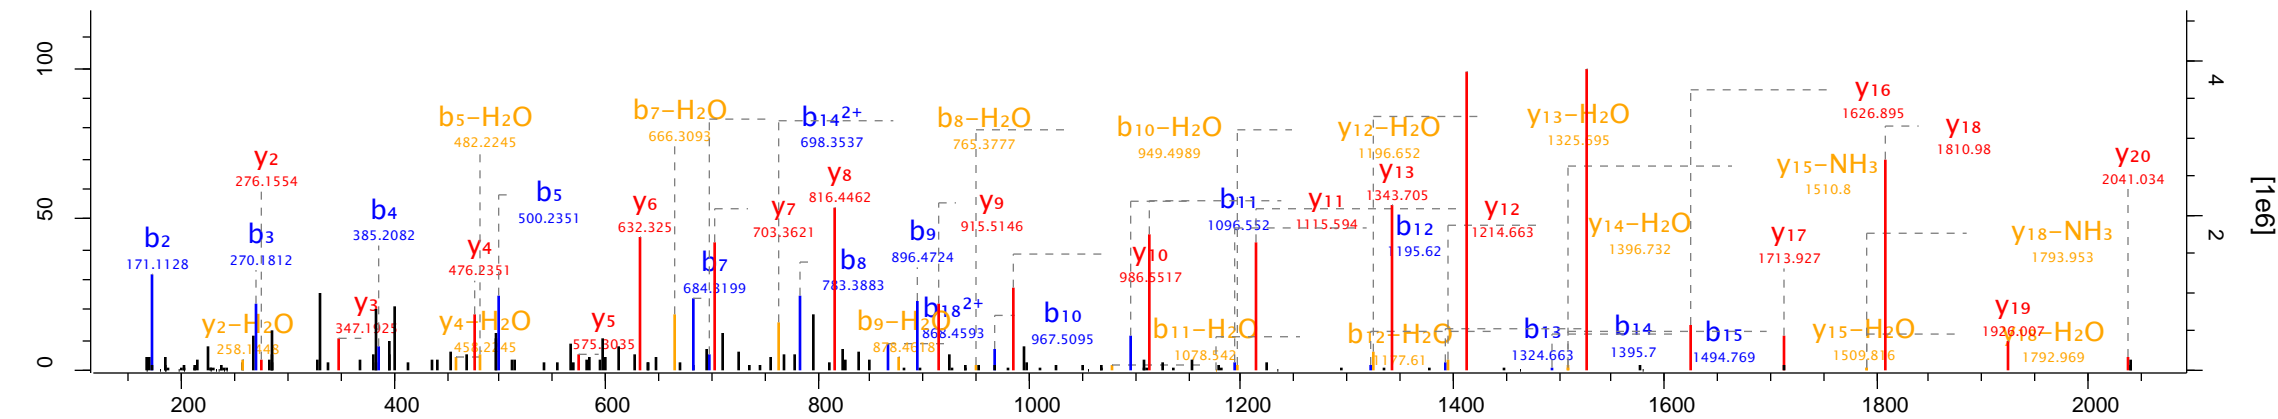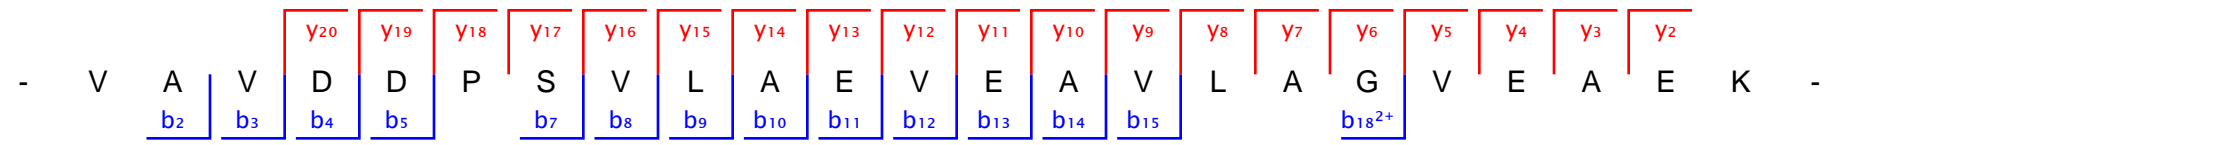

Raw file Scan Method Score m/z Gene names  
 20140602\_QEp4\_FaHo\_SA\_HDA3\_01 5095 FTMS; HCD 106.1 846.07 HSP30

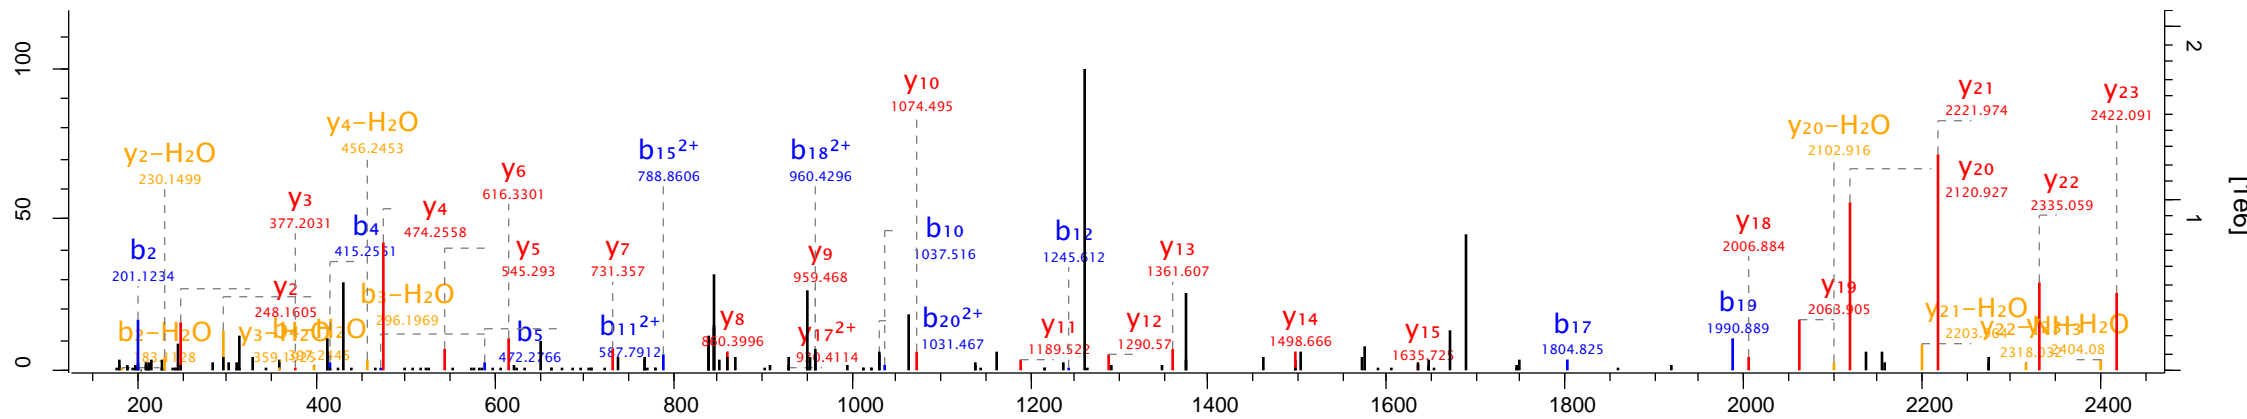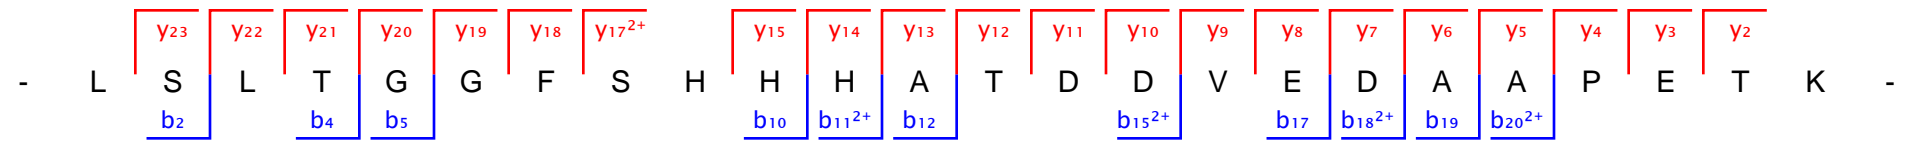

Raw file Scan Method Score m/z Gene names

20140602\_QEp4\_FaHo\_SA\_HDA3\_01 5269 FTMS; HCD 70.68 434.57 GPH1

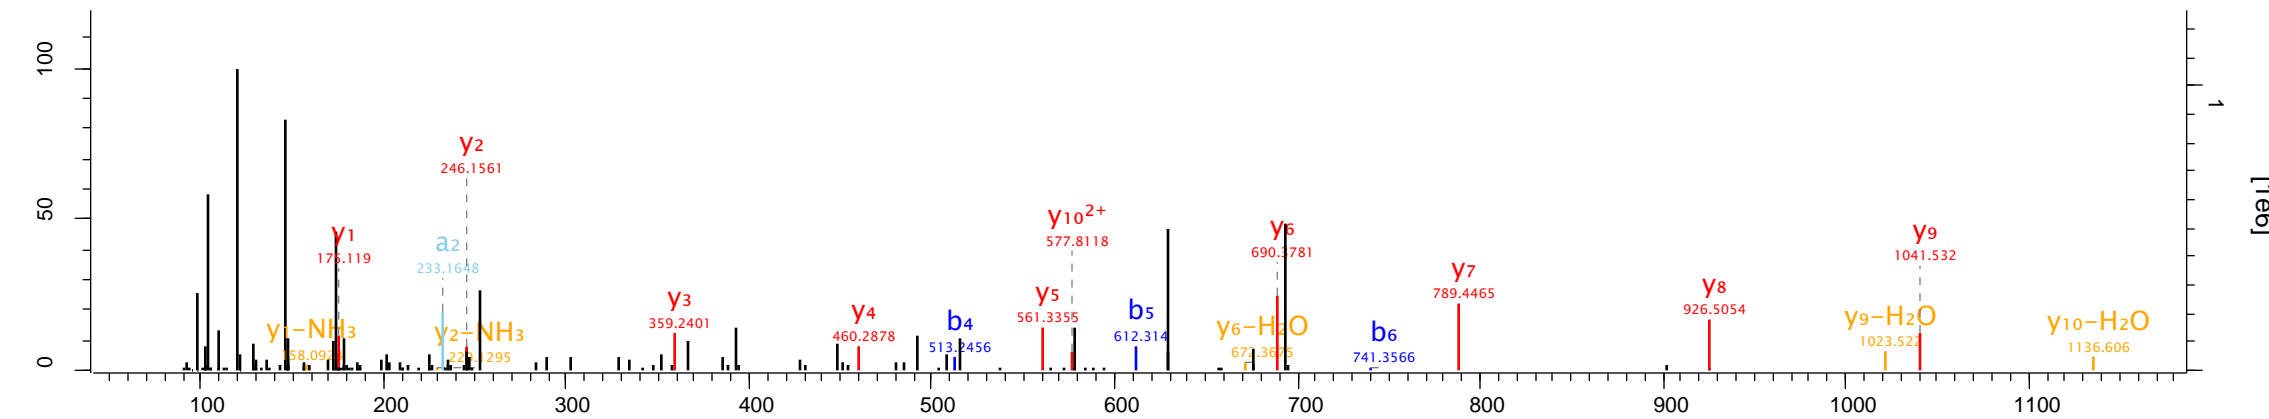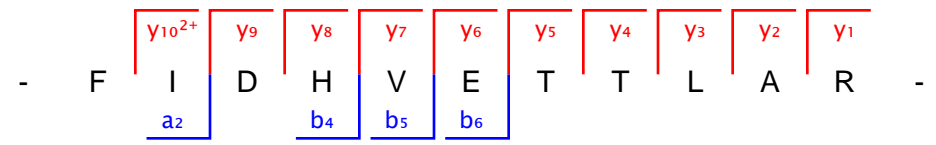

Raw file Scan Method Score m/z Gene names

20140602\_QEp4\_FaHo\_SA\_HDA3\_02 4577 FTMS; HCD 133.86 689.98 HXT6

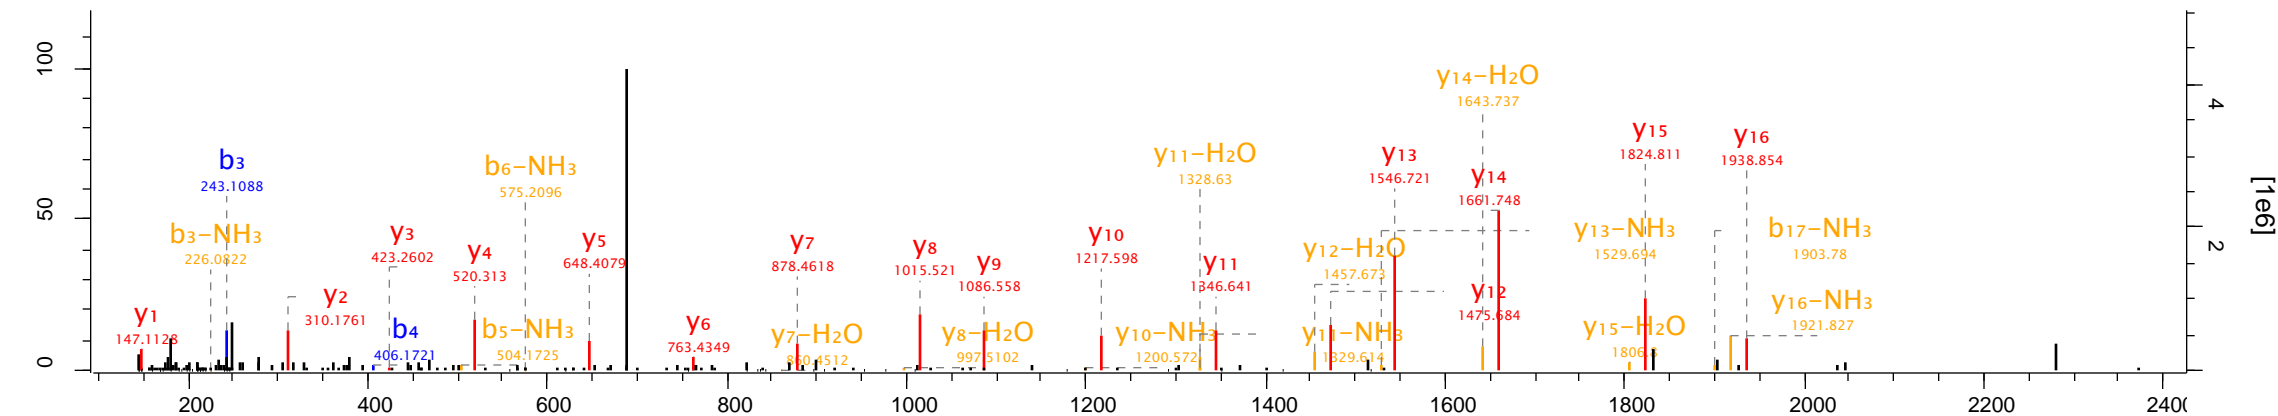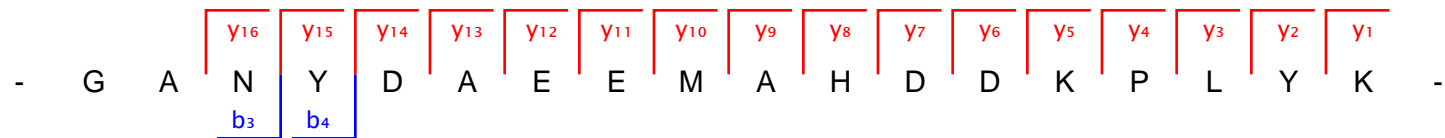

| Raw file                      | Scan | Method    | Score  | m/z    | Gene names |
|-------------------------------|------|-----------|--------|--------|------------|
| 20140602_QEp4_FaHo_SA_HDA3_02 | 5020 | FTMS; HCD | 142.12 | 675.87 | HXT6;HXT7  |

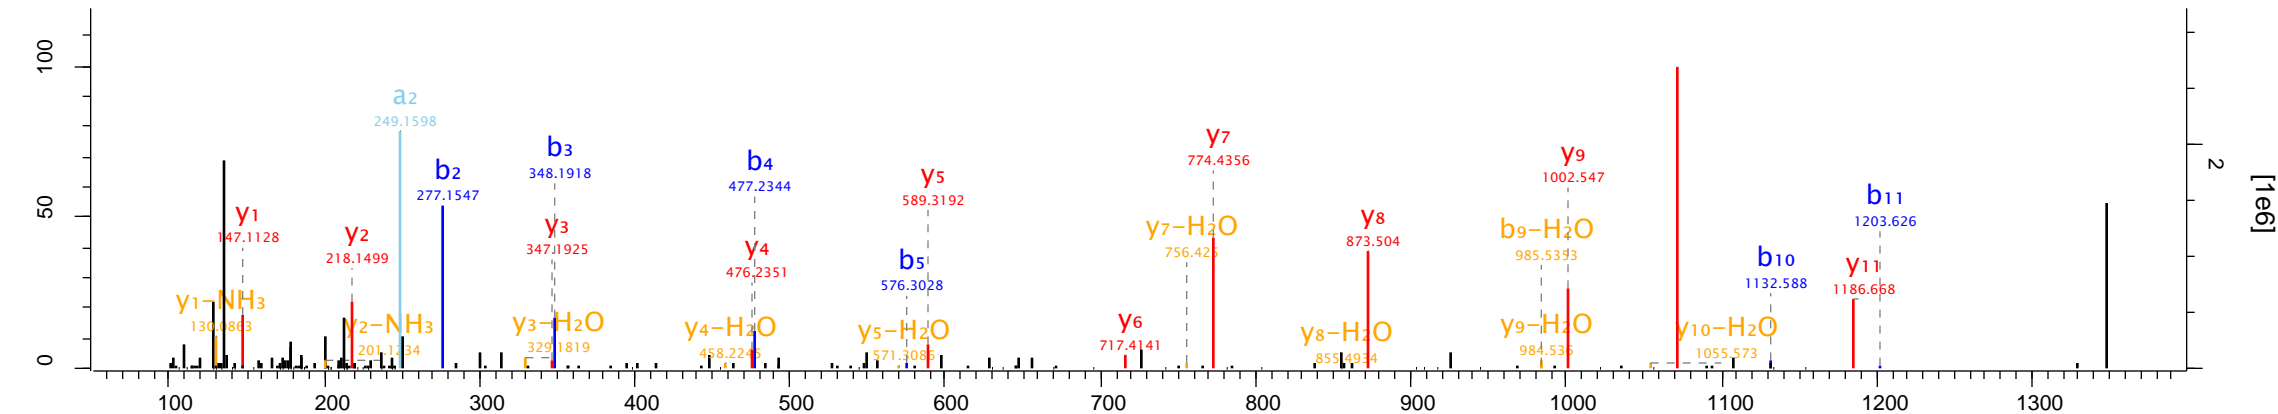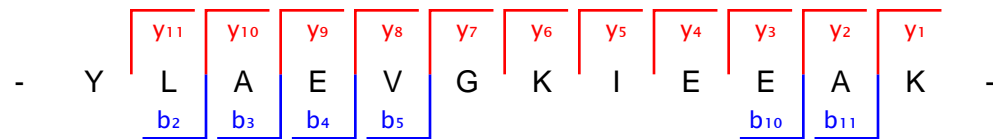



Raw file Scan Method Score m/z Gene names

20140602\_QEp4\_FaHo\_SA\_HDA3\_02 9252 FTMS; HCD 50.3 634.31 HUA1

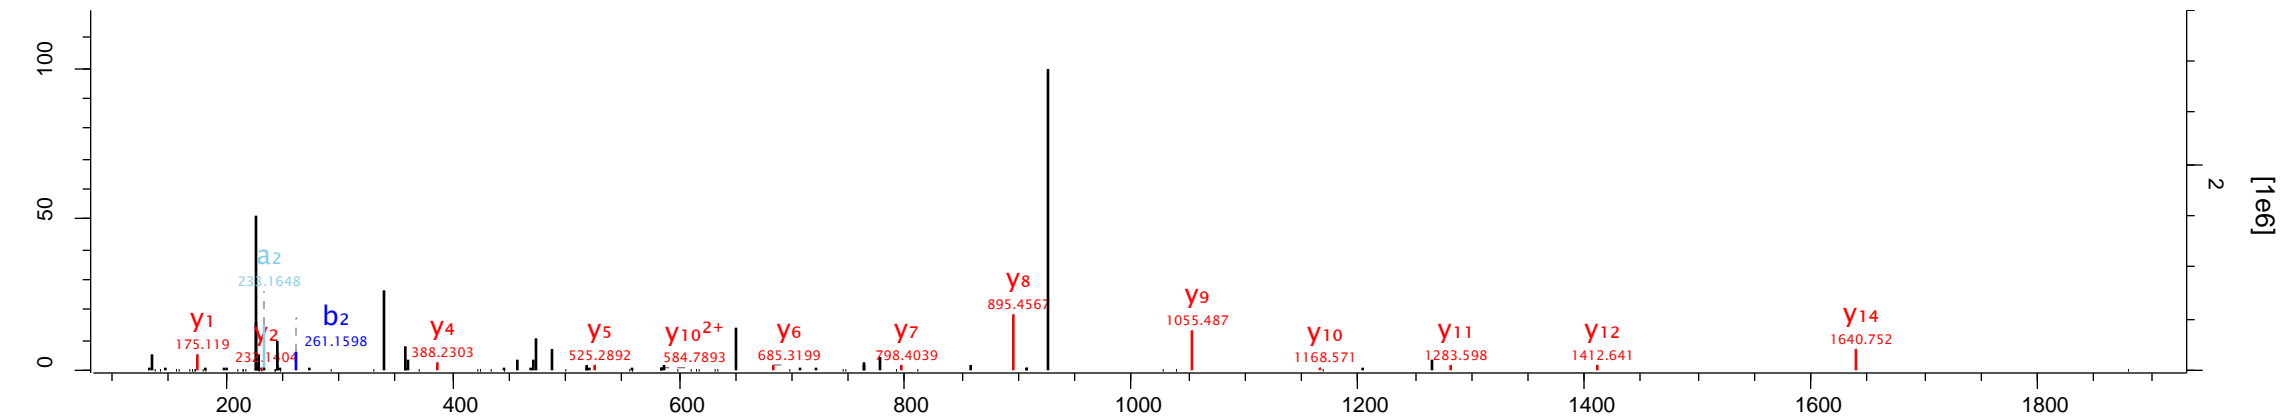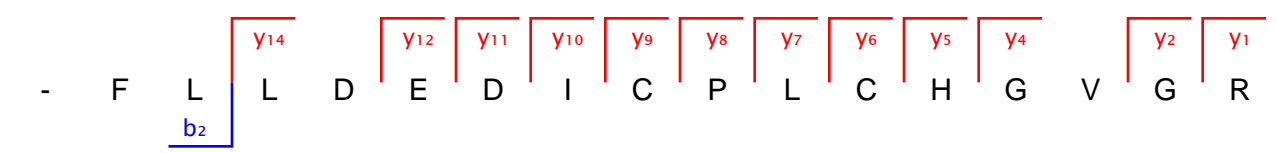

Raw file

20140602\_QEp4\_FaHo\_SA\_HDA3\_03

Scan Method Score m/z Gene names

1935 FTMS; HCD 135.6 366.7 RPS0A

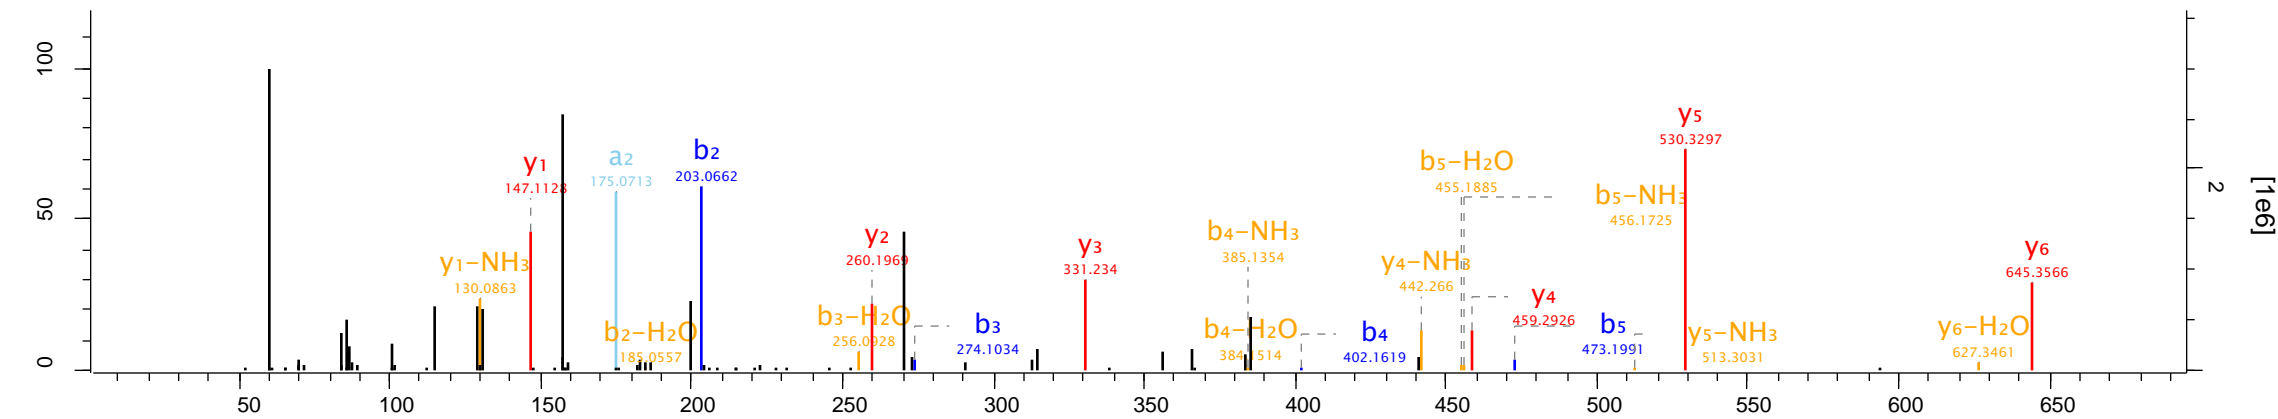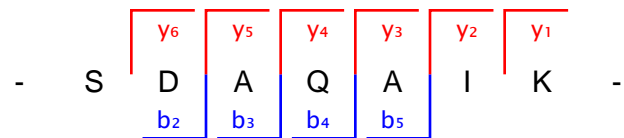

Raw file Scan Method Score m/z Gene names

20140602\_QEp4\_FaHo\_SA\_HDA3\_03 2243 FTMS; HCD 144.57 581.8 HXT6;HXT7

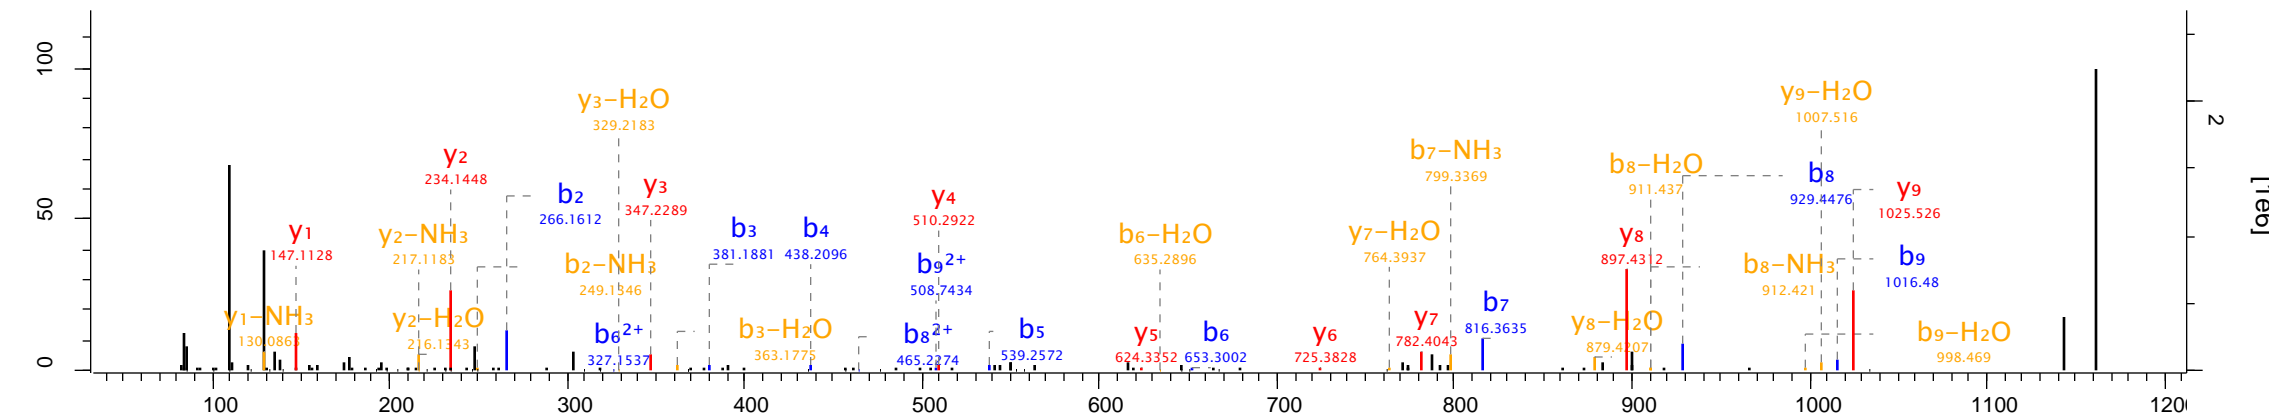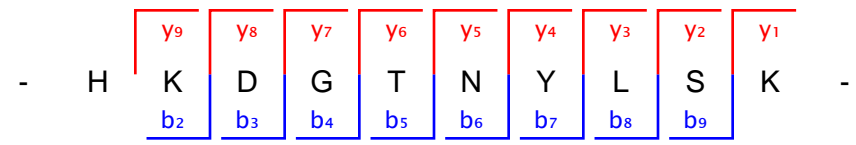

| Raw file                      | Scan | Method    | Score | m/z    | Gene names |
|-------------------------------|------|-----------|-------|--------|------------|
| 20140602_QEp4_FaHo_SA_HDA3_03 | 5116 | FTMS; HCD | 74.99 | 484.26 | EMI2       |

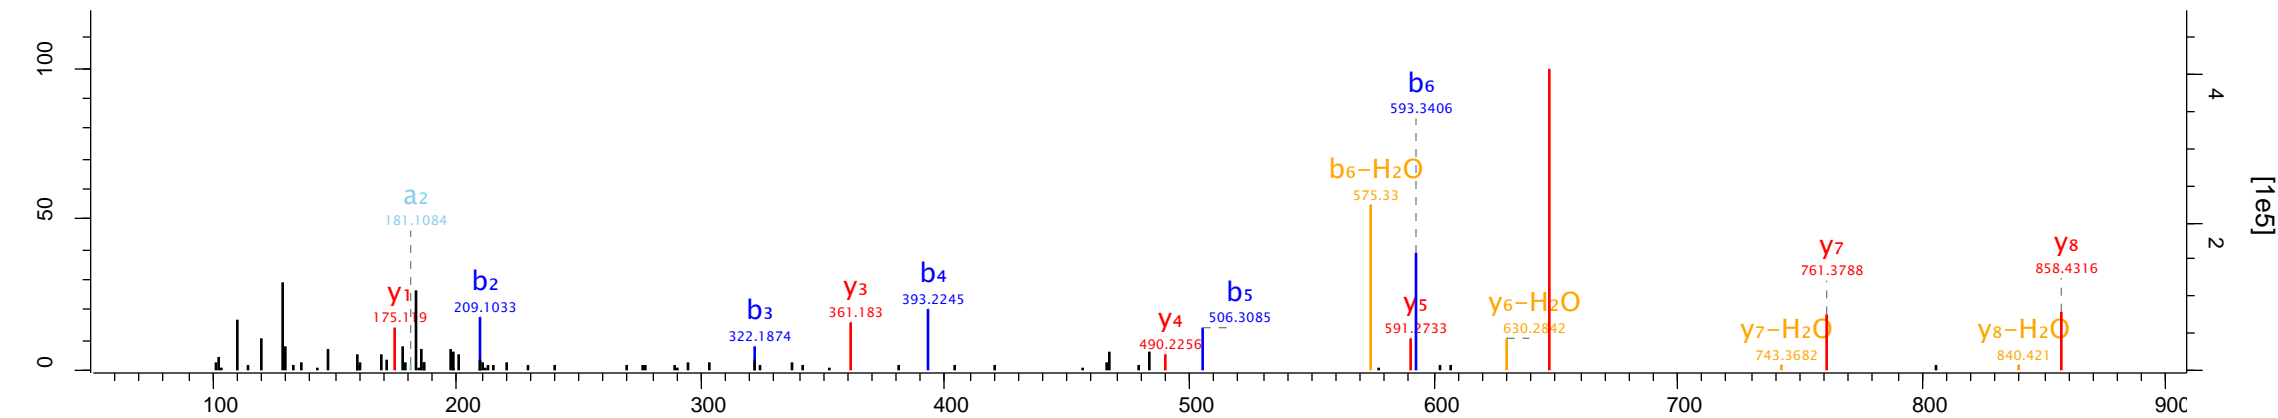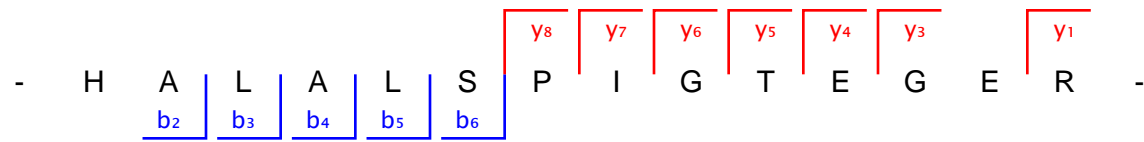

Raw file Scan Method Score m/z Gene names

20140602\_QEp4\_FaHo\_SA\_HDA3\_03 6959 FTMS; HCD 85.94 749.71 GAS3

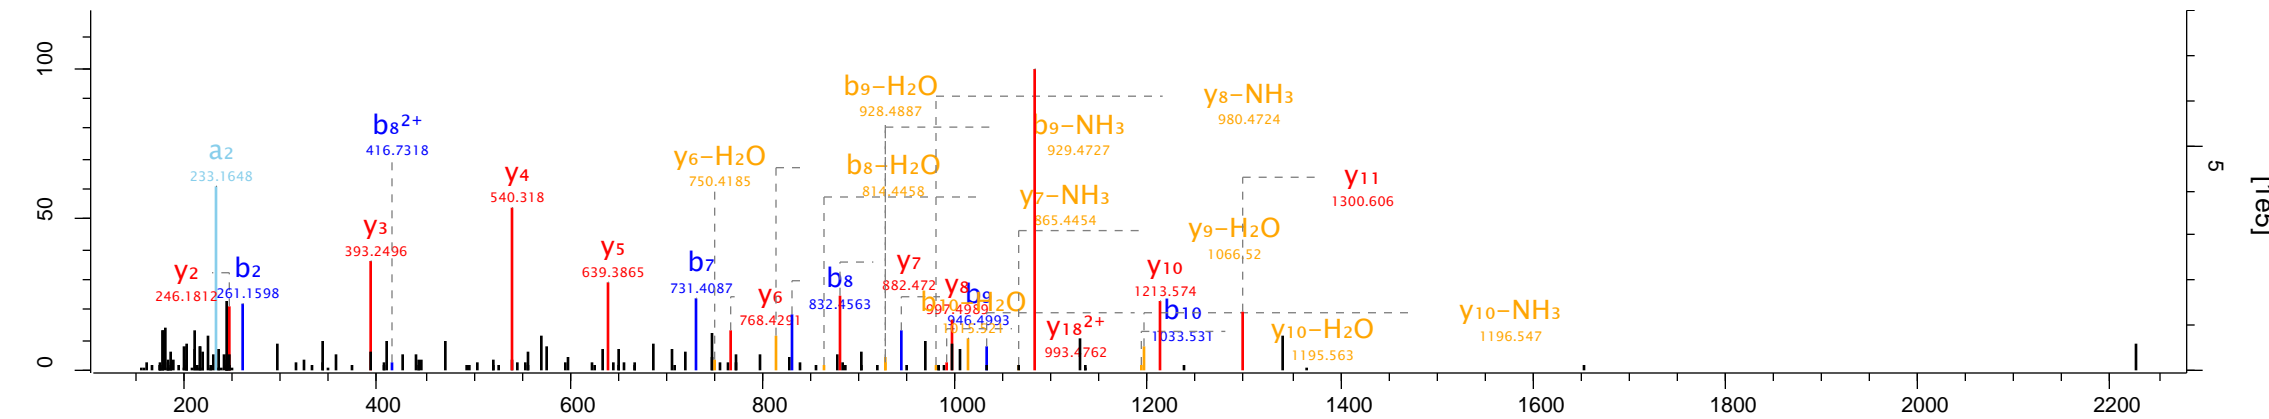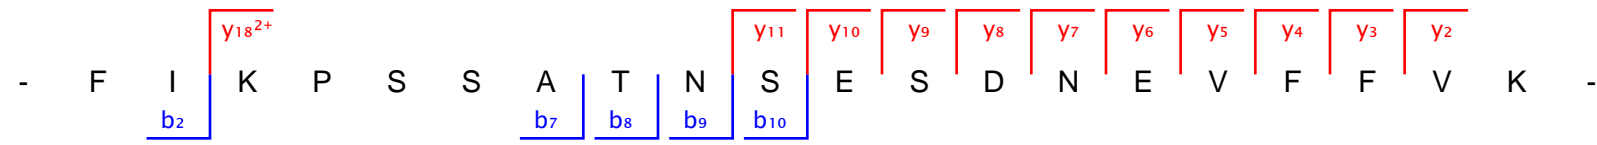

| Raw file                      | Scan | Method    | Score | m/z    | Gene names |
|-------------------------------|------|-----------|-------|--------|------------|
| 20140602_QEp4_FaHo_SA_HDA3_03 | 6990 | FTMS; HCD | 73.8  | 603.32 | YIL108W    |

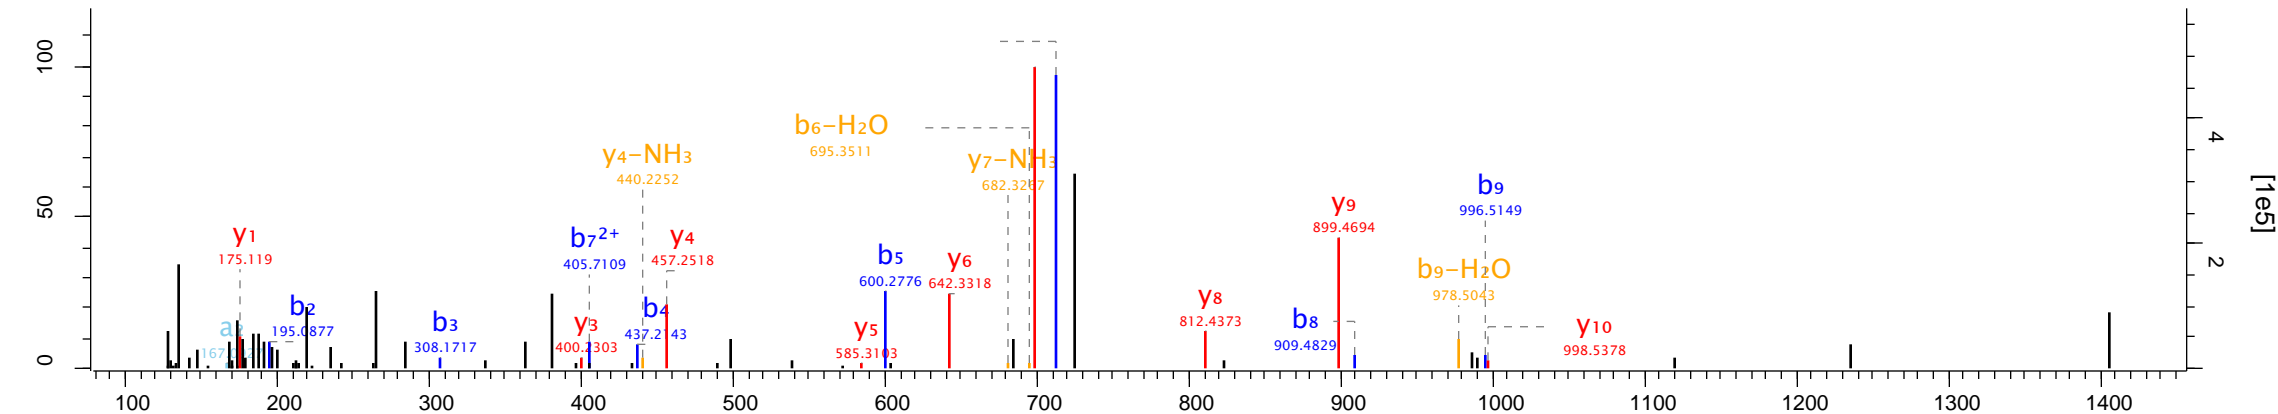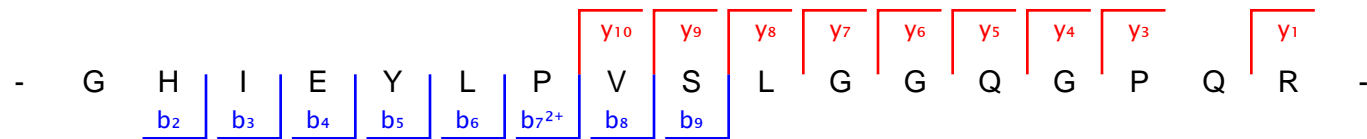

Raw file Scan Method Score m/z Gene names

20140602\_QEp4\_FaHo\_SA\_HDA3\_03 9521 FTMS; HCD 87.18 583.33 ERV46

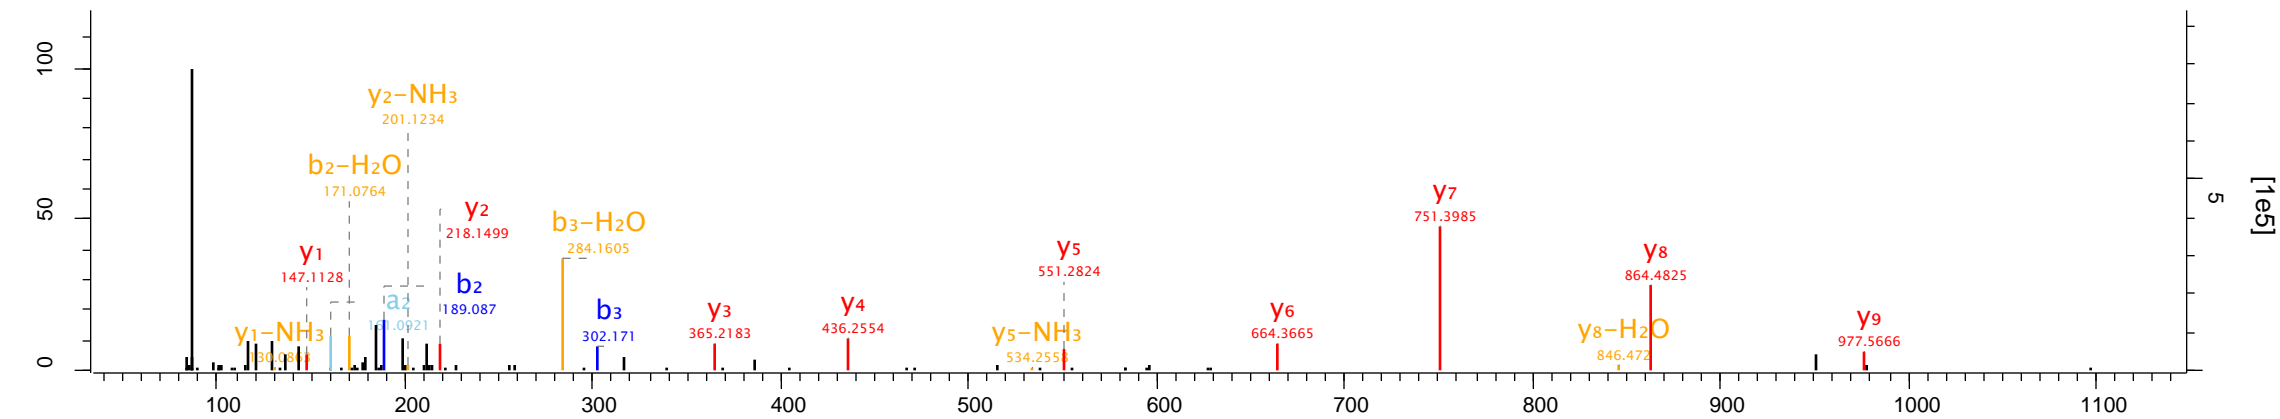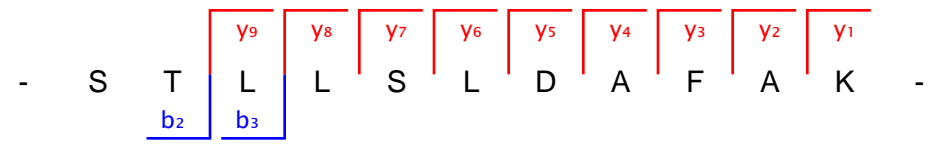

Raw file Scan Method Score m/z Gene names

20140602\_QEp4\_FaHo\_SA\_HDA3\_03 9694 FTMS; HCD 90.46 791.75 HEM15

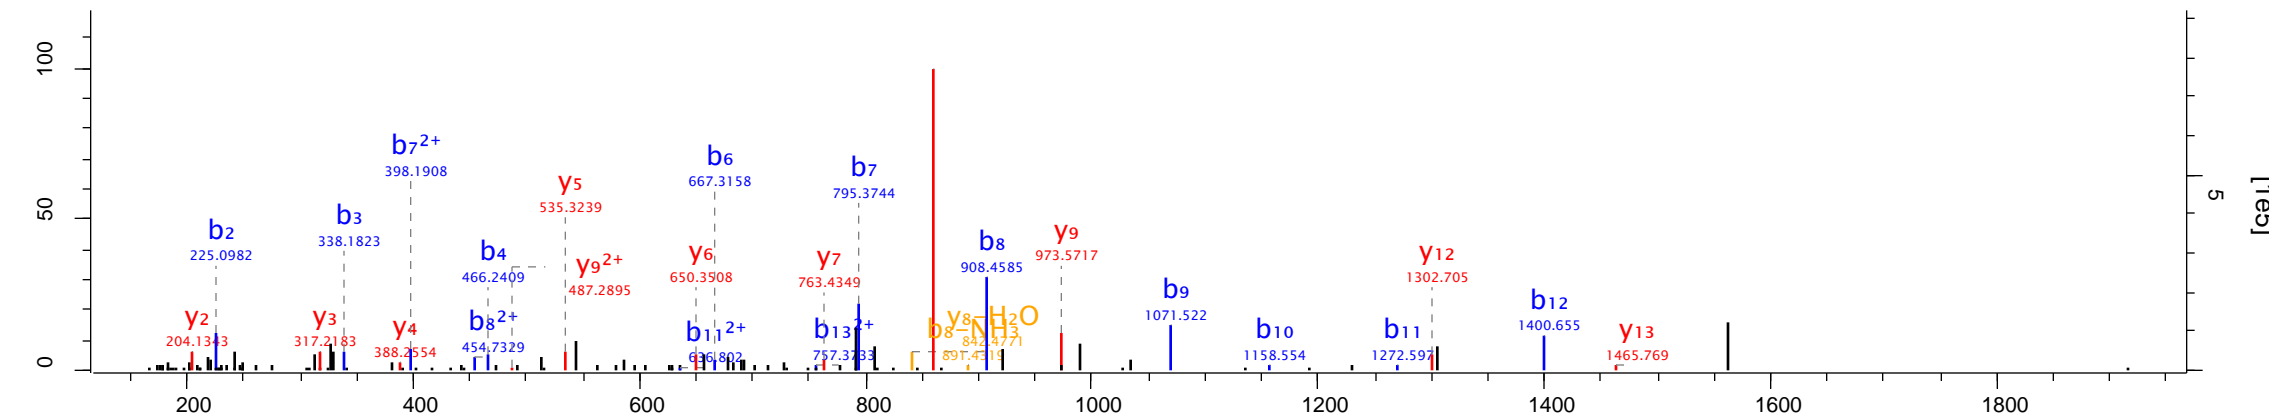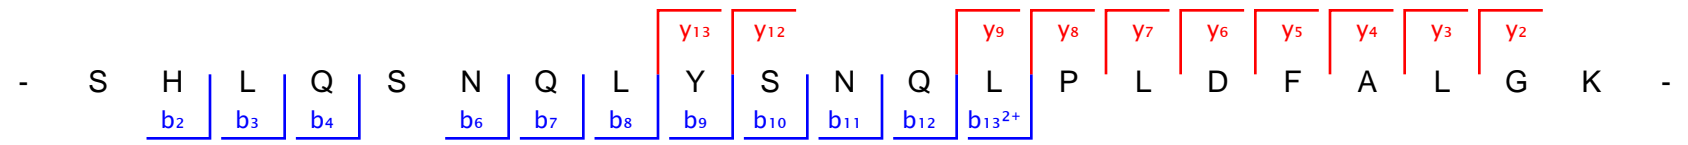



| Raw file                      | Scan | Method    | Score  | m/z    | Gene names  |
|-------------------------------|------|-----------|--------|--------|-------------|
| 20140602_QEp4_FaHo_SA_HIF1_01 | 3543 | FTMS; HCD | 118.03 | 578.85 | RPL7A;RPL7B |

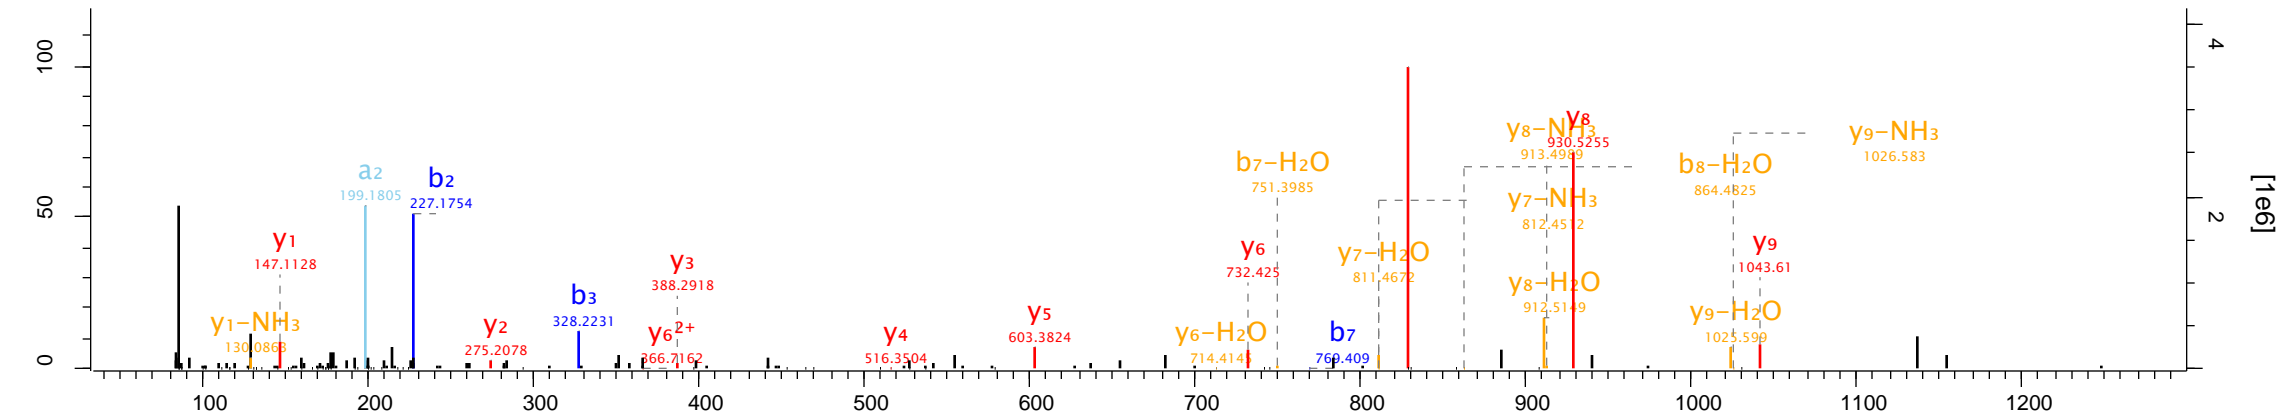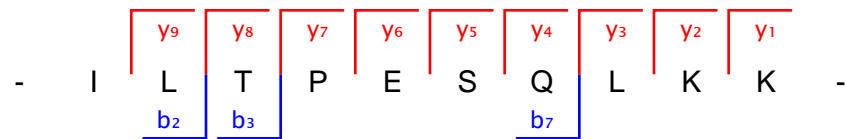

Raw file

20140602\_QEp4\_FaHo\_SA\_HIF1\_01

Scan Method Score m/z Gene names

8440 FTMS; HCD 220.85 789.89 ARF2

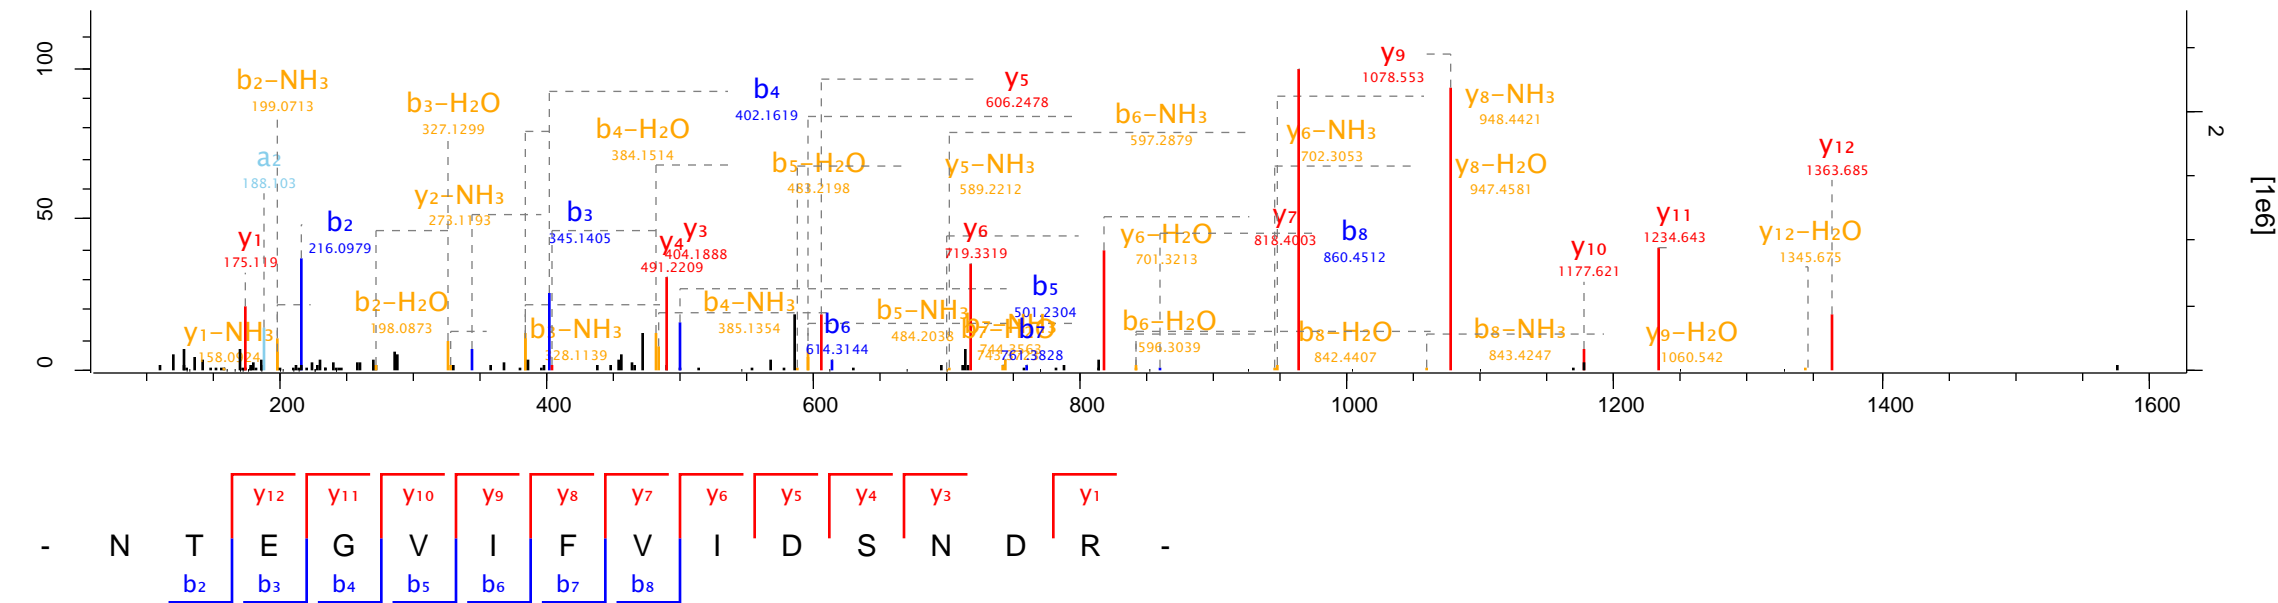

Raw file Scan Method Score m/z Gene names

20140602\_QEp4\_FaHo\_SA\_HIF1\_02 5313 FTMS; HCD 164.79 885.73 TY1B-ML1

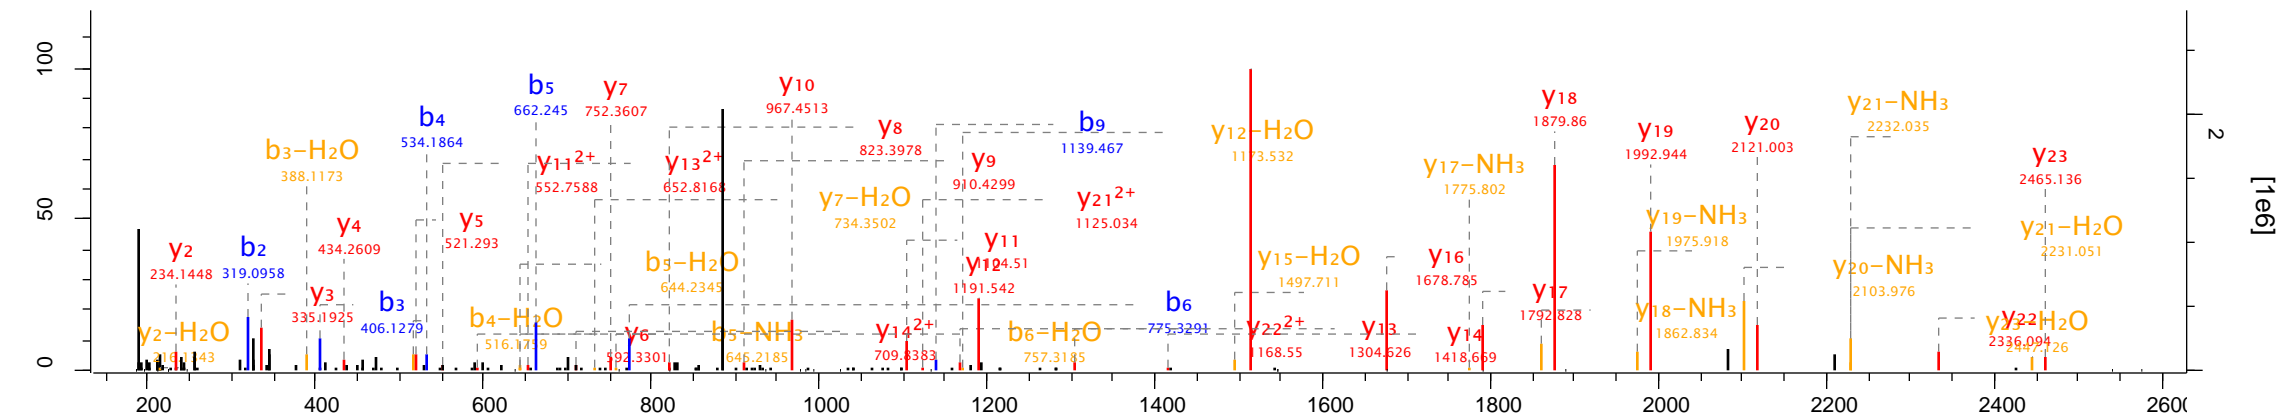

ac ox M E S Q Q L S N Y P N I S H G S A C A S V T S K -

b<sub>2</sub> b<sub>3</sub> b<sub>4</sub> b<sub>5</sub> b<sub>6</sub> b<sub>9</sub>

Raw file Scan Method Score m/z Gene names

20140602\_QEp4\_FaHo\_SA\_HIF1\_5380 FTMS; 44.64 735.37 TY1B-ML1;TY1B-MR2;TY1B-OR;TY1B-DR1;TY1B-PR2;TY1B-DR5;TY1B-PR1;TY1B-JR2;TY1B-OL;TY1B-LR4;TY1B-ML2;TY1B-DR3;TY1B-PR3;TY1B-PL;TY1B-LR

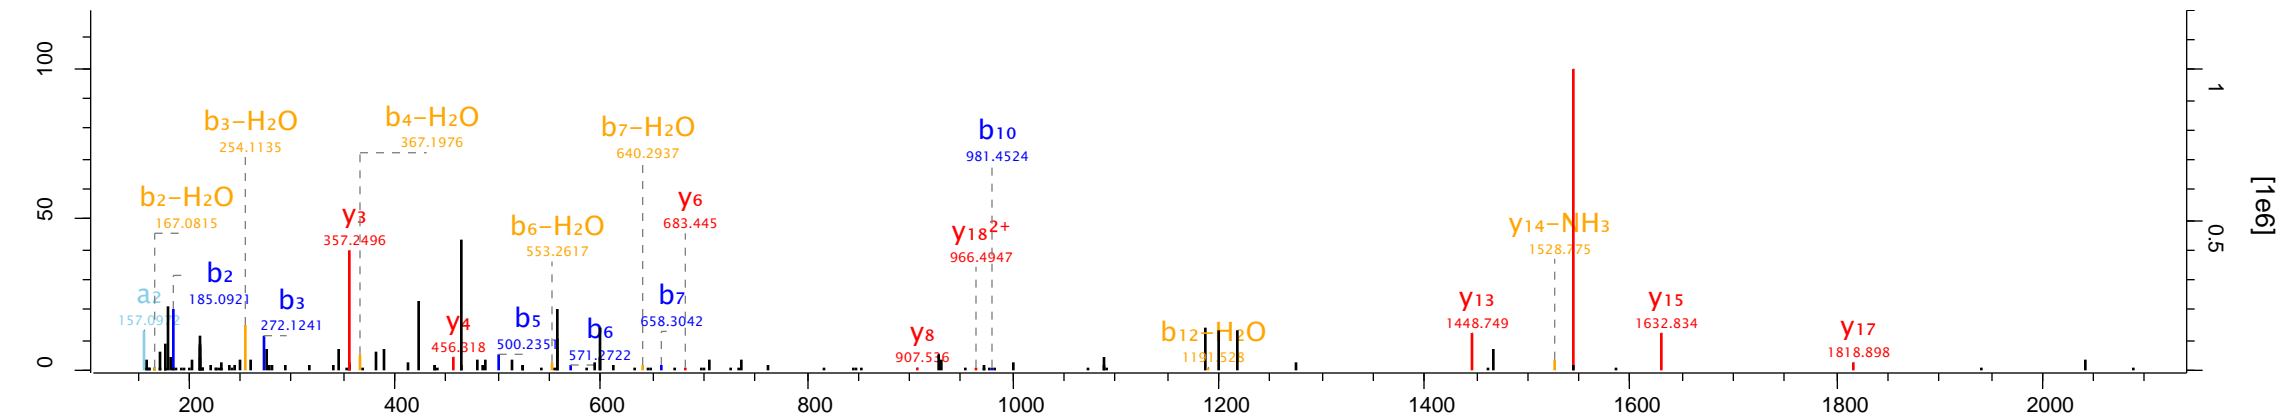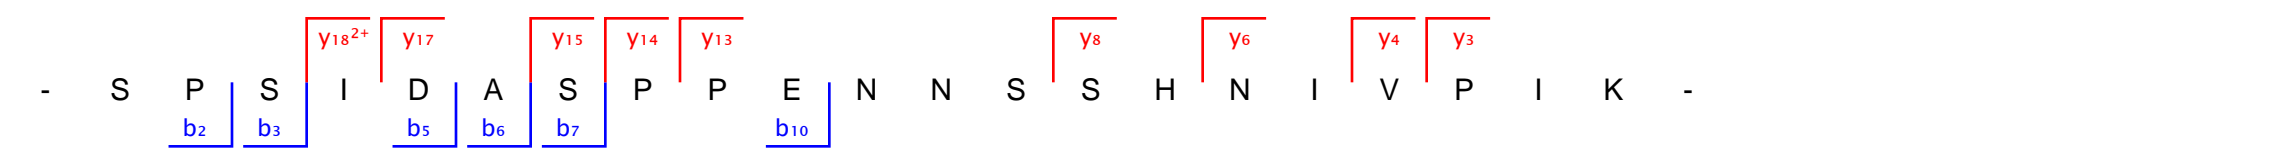

| Raw file                      | Scan | Method    | Score | m/z    | Gene names  |
|-------------------------------|------|-----------|-------|--------|-------------|
| 20140602_QEp4_FaHo_SA_HIF1_03 | 2444 | FTMS; HCD | 98.58 | 448.23 | RPL4B;RPL4A |

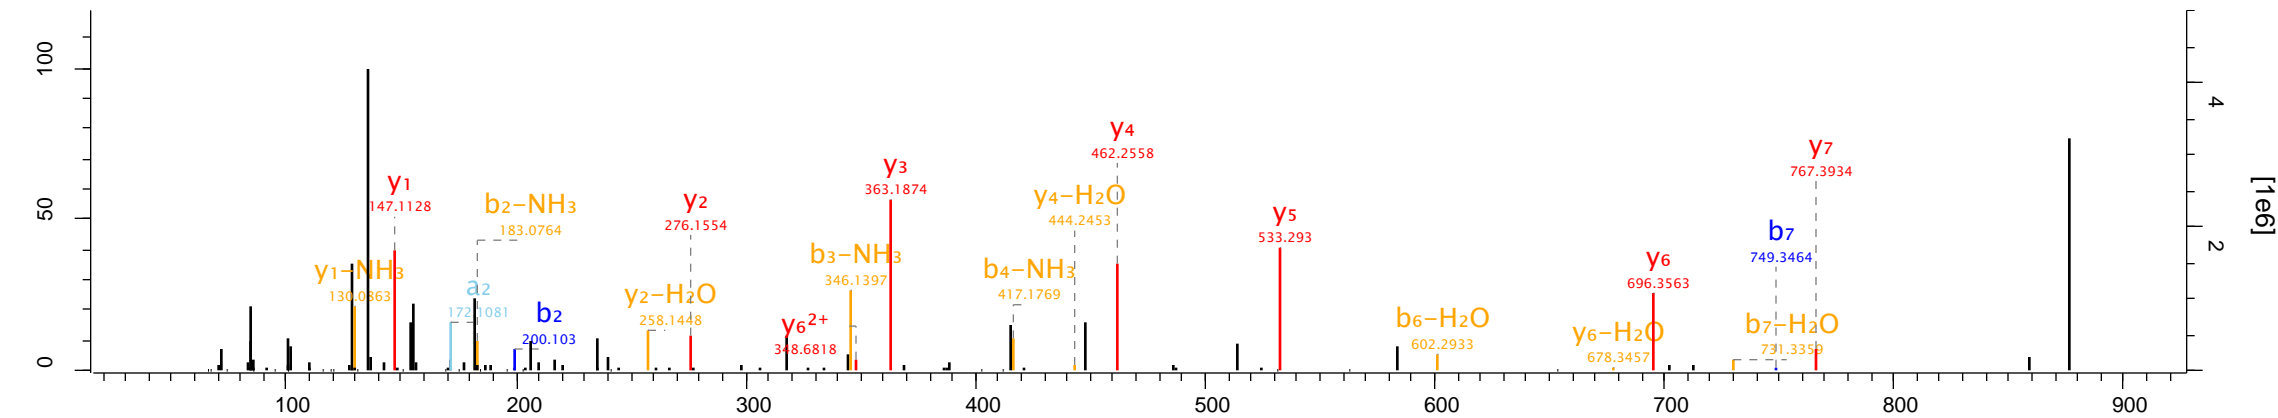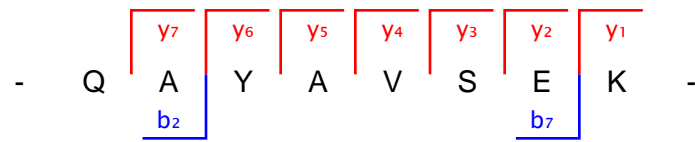

Raw file Scan Method Score m/z Gene names

20140602\_QEp4\_FaHo\_SA\_HIF1\_03 7284 FTMS; HCD 121.99 466.29 NTF2

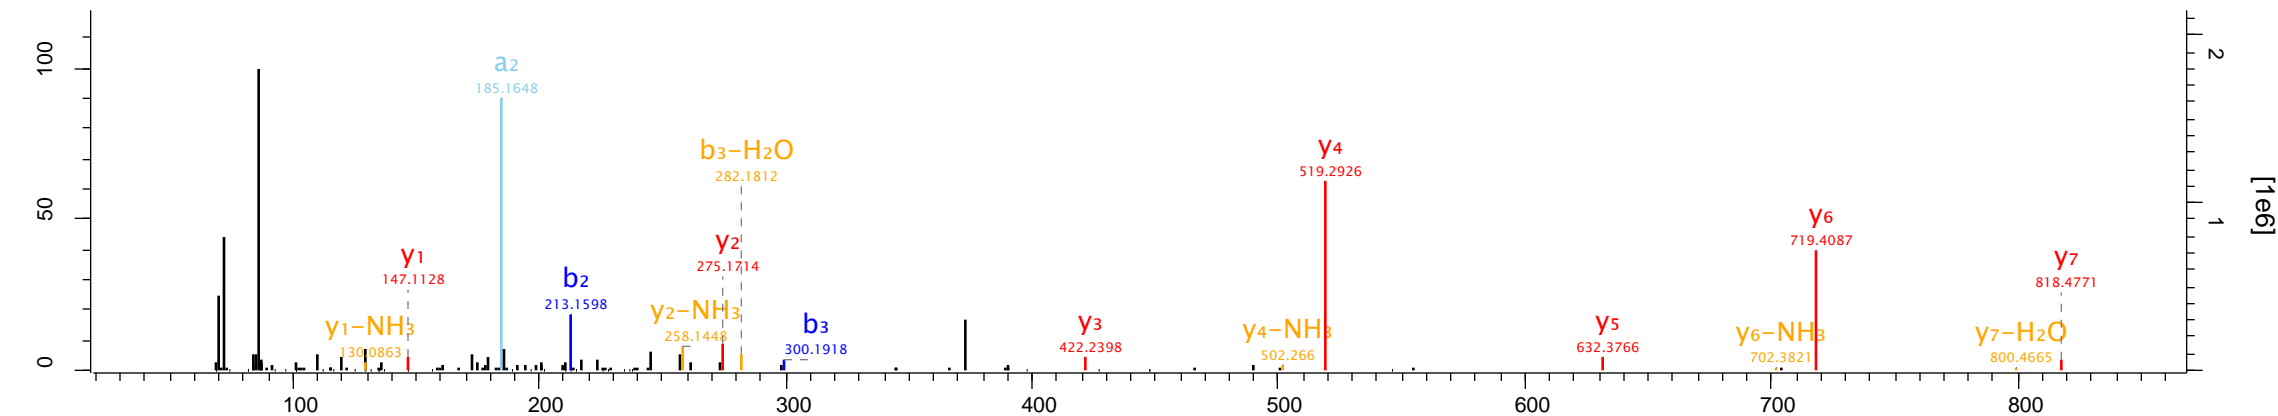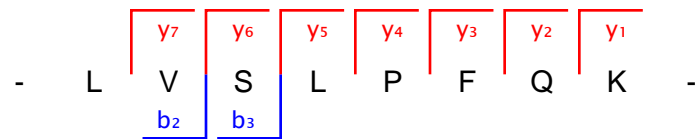

| Raw file                      | Scan | Method    | Score | m/z    | Gene names    |
|-------------------------------|------|-----------|-------|--------|---------------|
| 20140602_QEp4_FaHo_SA_IOC4_03 | 3370 | FTMS; HCD | 97.97 | 320.19 | RPL31A;RPL31B |

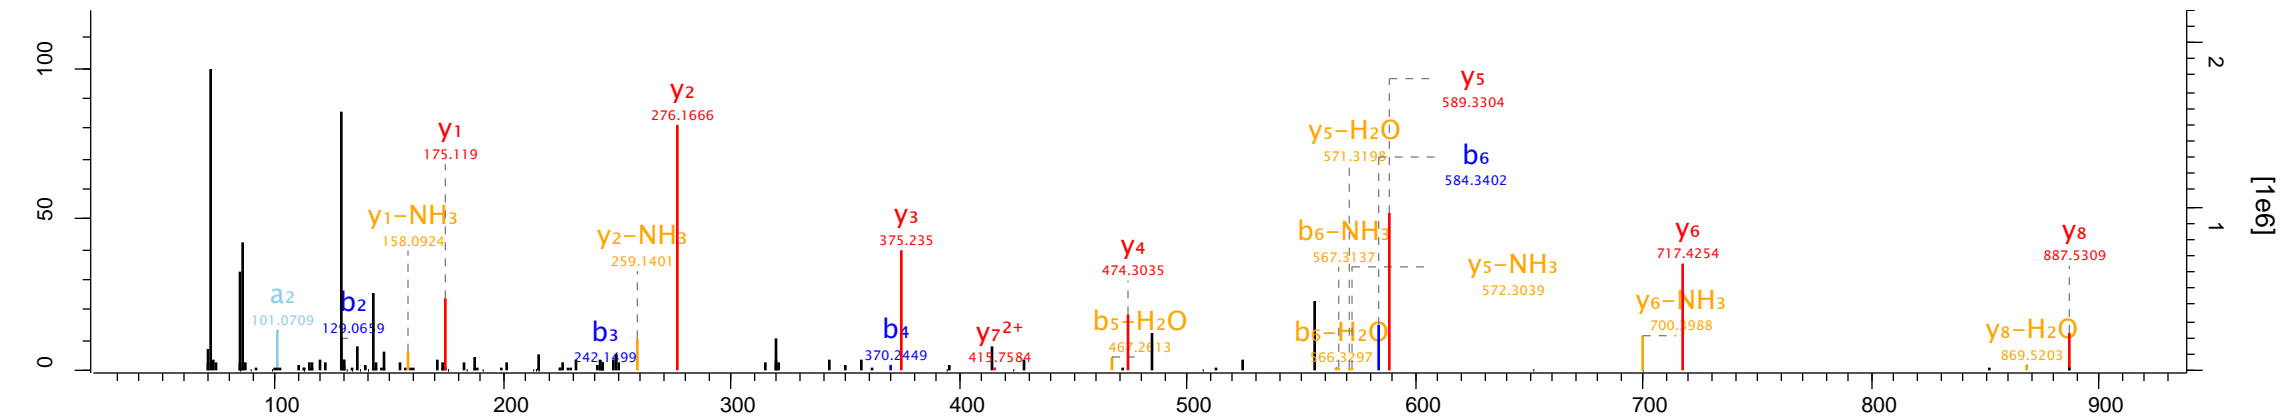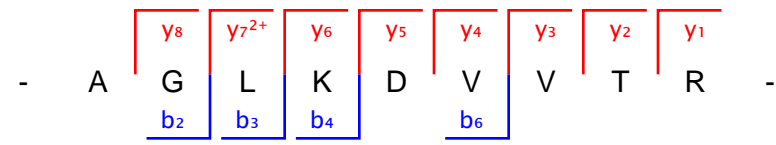

| Raw file                      | Scan | Method    | Score  | m/z    | Gene names    |
|-------------------------------|------|-----------|--------|--------|---------------|
| 20140602_QEp4_FaHo_SA_IOC4_03 | 4928 | FTMS; HCD | 198.07 | 461.74 | RPL14B;RPL14A |

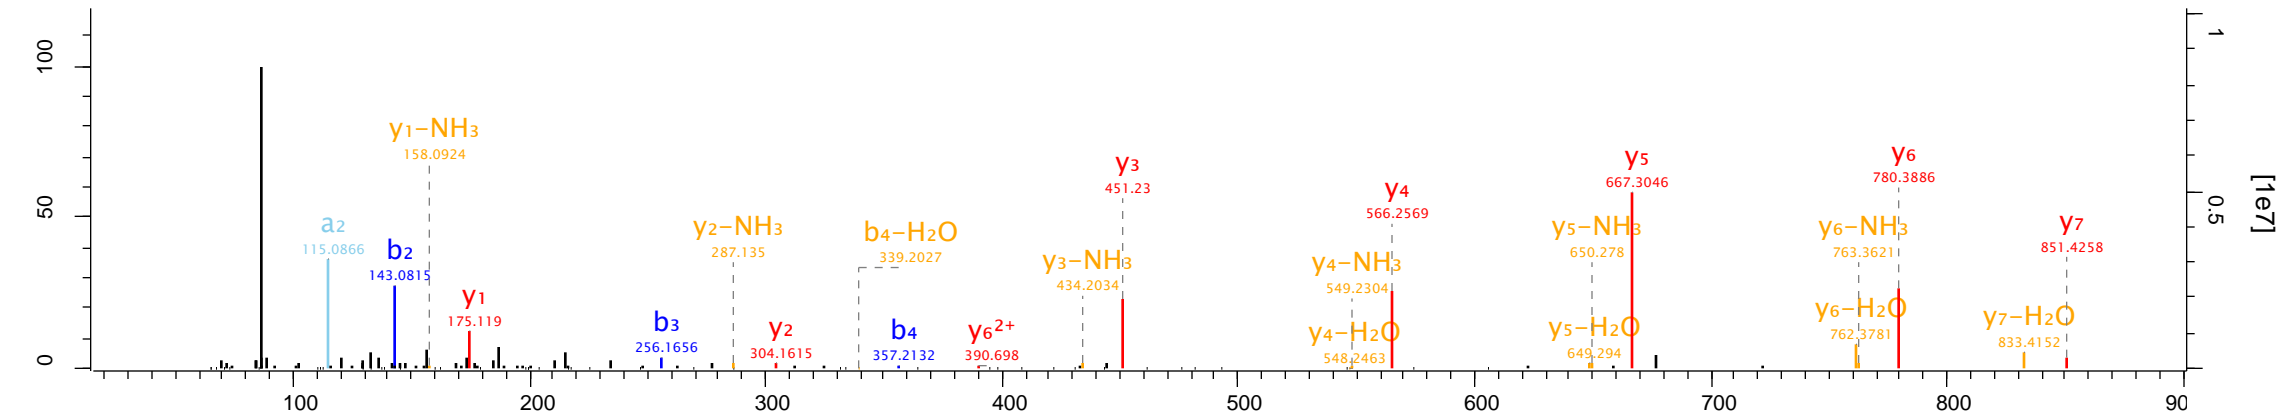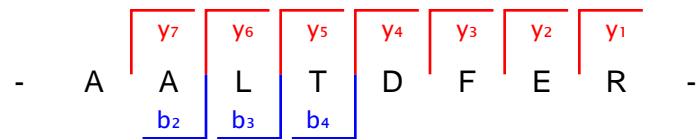



| Raw file                      | Scan | Method    | Score  | m/z   | Gene names |
|-------------------------------|------|-----------|--------|-------|------------|
| 20140602_QEp4_FaHo_SA_IOC4_03 | 5826 | FTMS; HCD | 104.22 | 493.8 | CDC19;PYK2 |

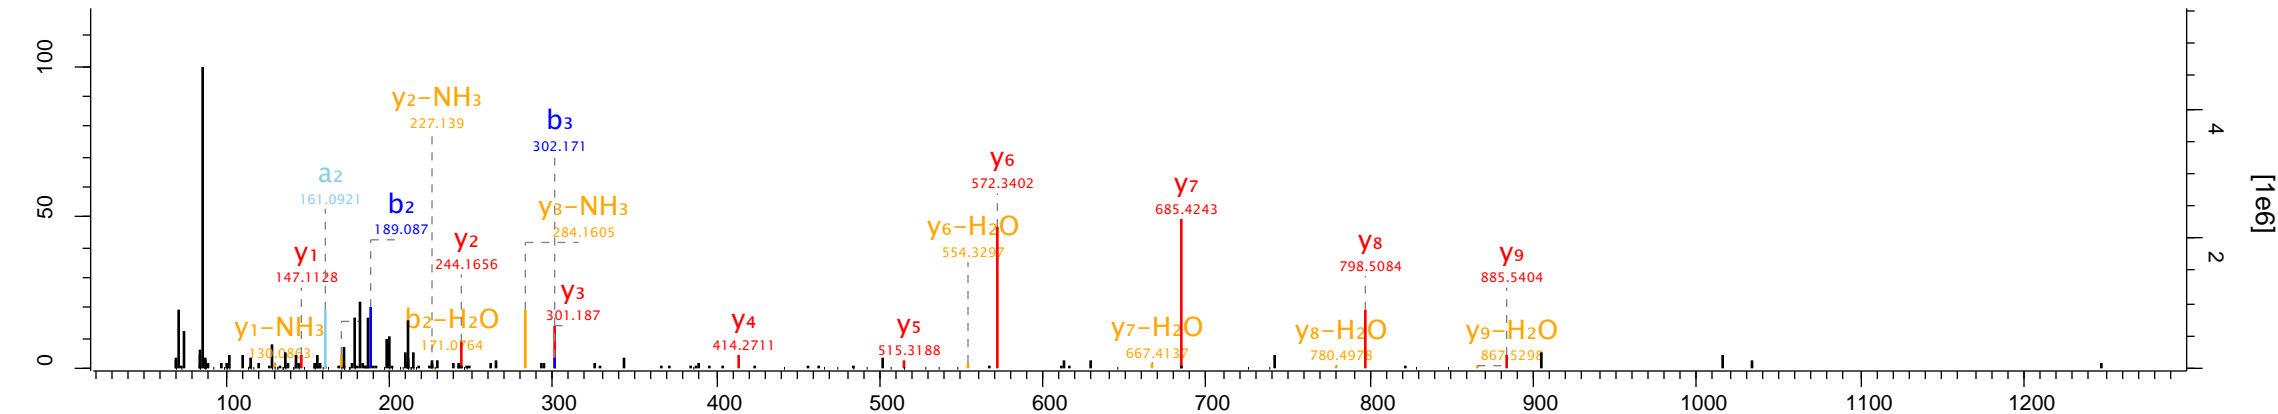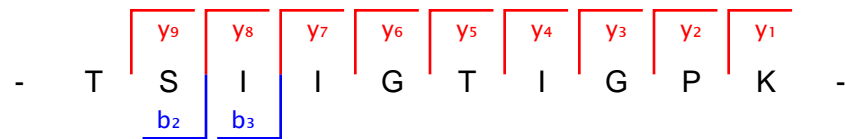

Raw file

Scan Method Score m/z Gene names

20140602\_QEp4\_FaHo\_SA\_IOC4\_03

8661 FTMS; HCD 128.54 715.9 DCW1

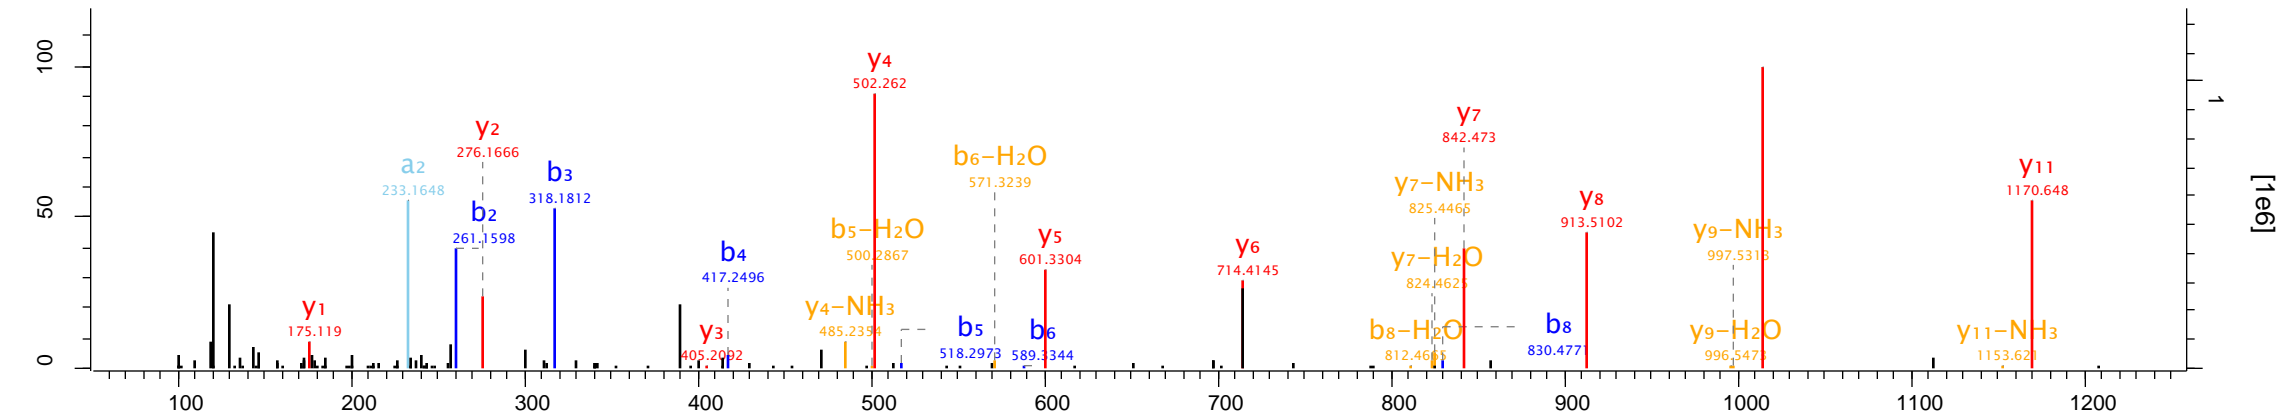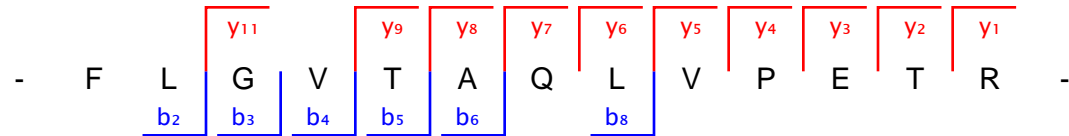

Raw file Scan Method Score m/z Gene names

20140602\_QEp4\_FaHo\_SA\_NTO1\_02 2834 FTMS; HCD 134.26 486.76 RPL36B

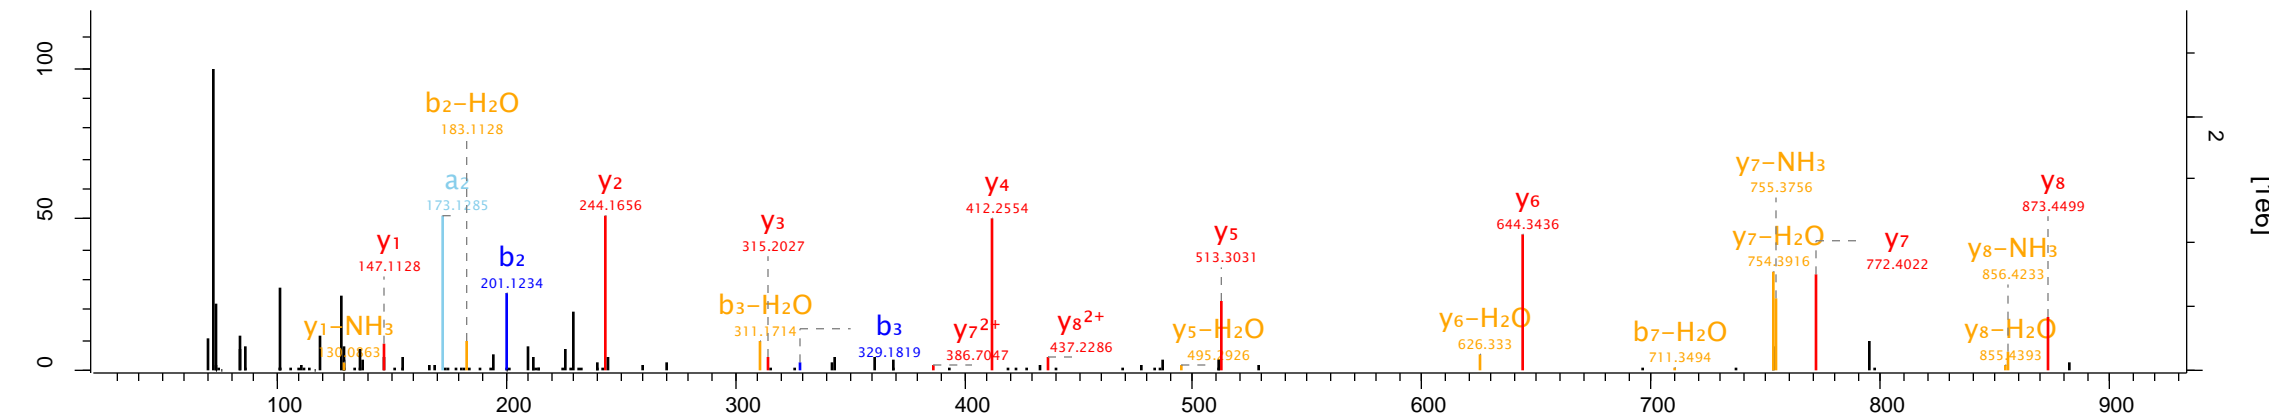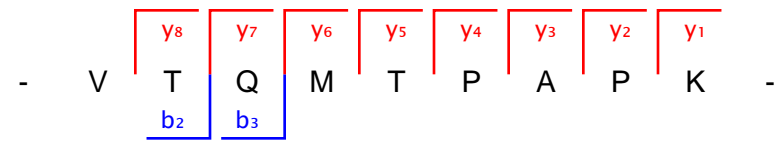

| Raw file                      | Scan | Method    | Score  | m/z   | Gene names    |
|-------------------------------|------|-----------|--------|-------|---------------|
| 20140602_QEp4_FaHo_SA_NTO1_03 | 2936 | FTMS; HCD | 134.85 | 390.7 | RPL17A;RPL17B |

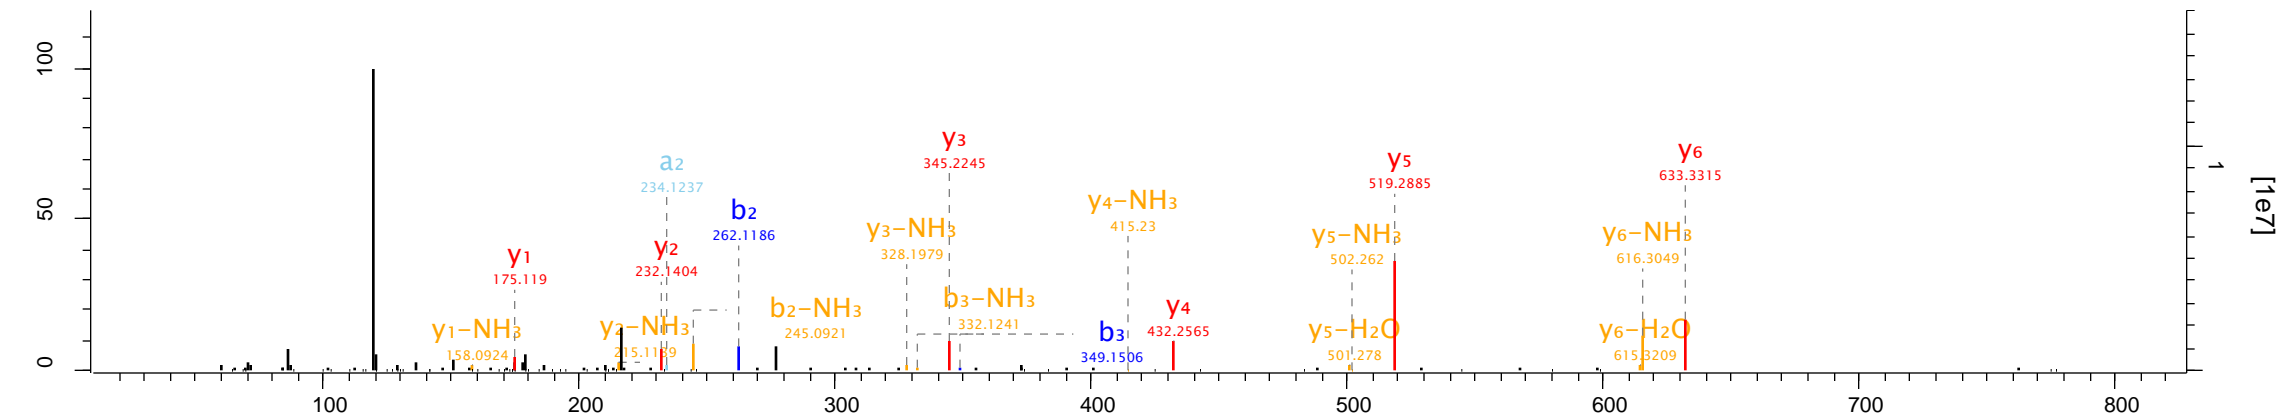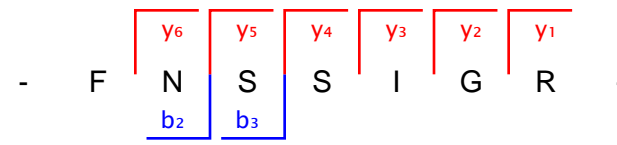

| Raw file                      | Scan | Method    | Score  | m/z    | Gene names  |
|-------------------------------|------|-----------|--------|--------|-------------|
| 20140602_QEp4_FaHo_SA_NTO1_03 | 3110 | FTMS; HCD | 163.84 | 414.75 | RPL9A;RPL9B |

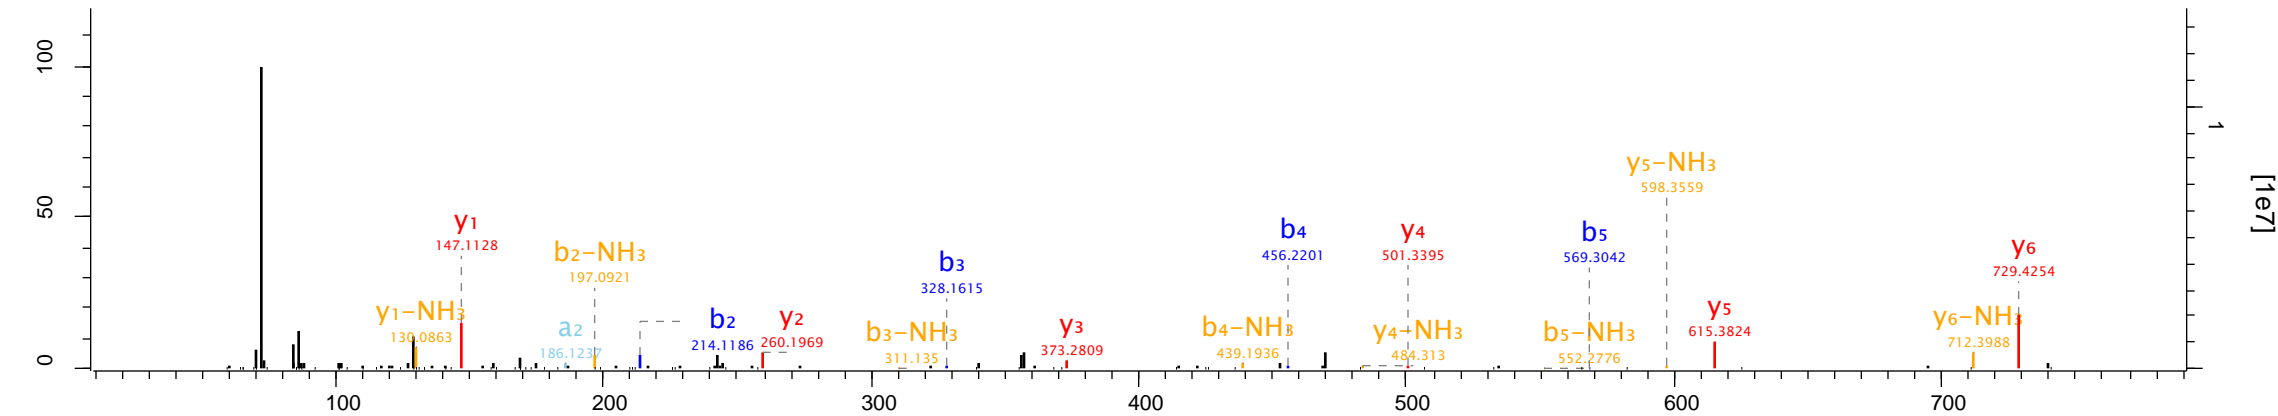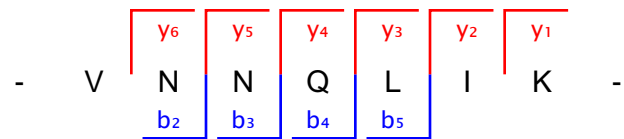

| Raw file                      | Scan | Method    | Score  | m/z    | Gene names                         |
|-------------------------------|------|-----------|--------|--------|------------------------------------|
| 20140602_QEp4_FaHo_SA_NTO1_03 | 3675 | FTMS; HCD | 167.67 | 605.83 | TY1B-NL1;TY1B-BL;TY1B-MR1;TY1A-MR1 |

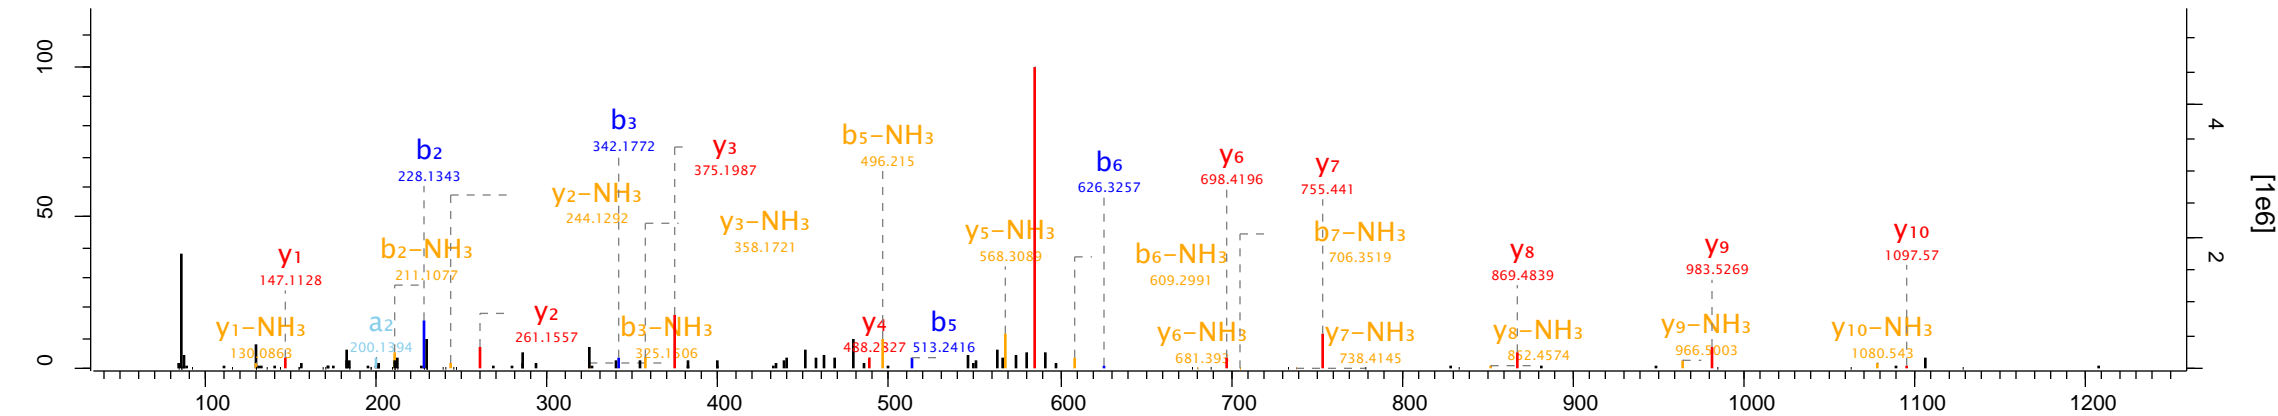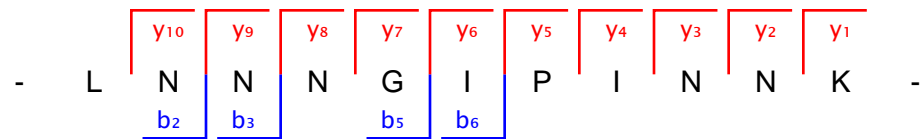

Raw file Scan Method Score m/z Gene names  
 20140602\_QEp4\_FaHo\_SA\_NTO1\_03 5759 FTMS; HCD 233.87 1064.51 TY1B-BR;TY1B-MR2;TY1B-OR;TY1B-NL2;TY1B-JR2;TY1B-NL1;TY1B-LR4;TY1B-PR3;TY1B-PL;TY1B-LR2;TY1B-DR6;TY1B-BL;TY1B-MR1

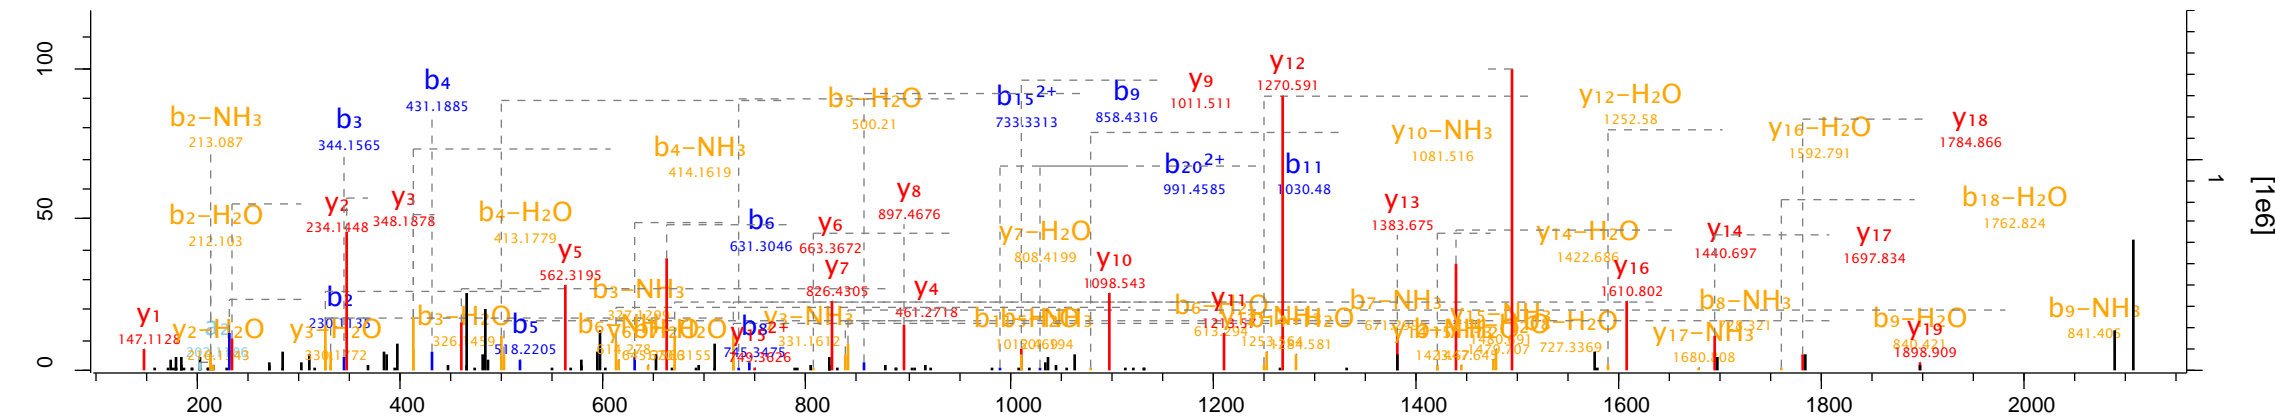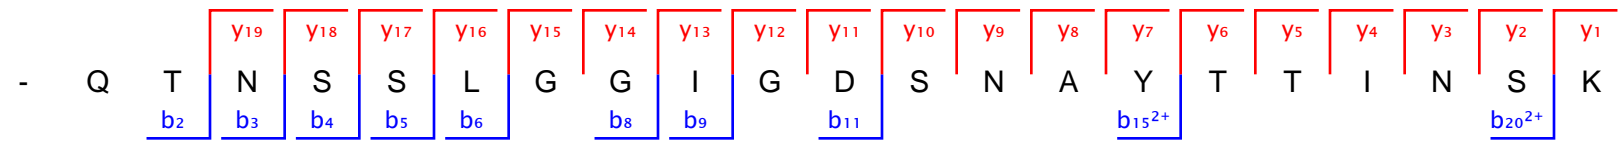

| Raw file                      | Scan | Method    | Score  | m/z   | Gene names    |
|-------------------------------|------|-----------|--------|-------|---------------|
| 20140602_QEp4_FaHo_SA_NTO1_03 | 6277 | FTMS; HCD | 154.84 | 580.3 | RPL31A;RPL31B |

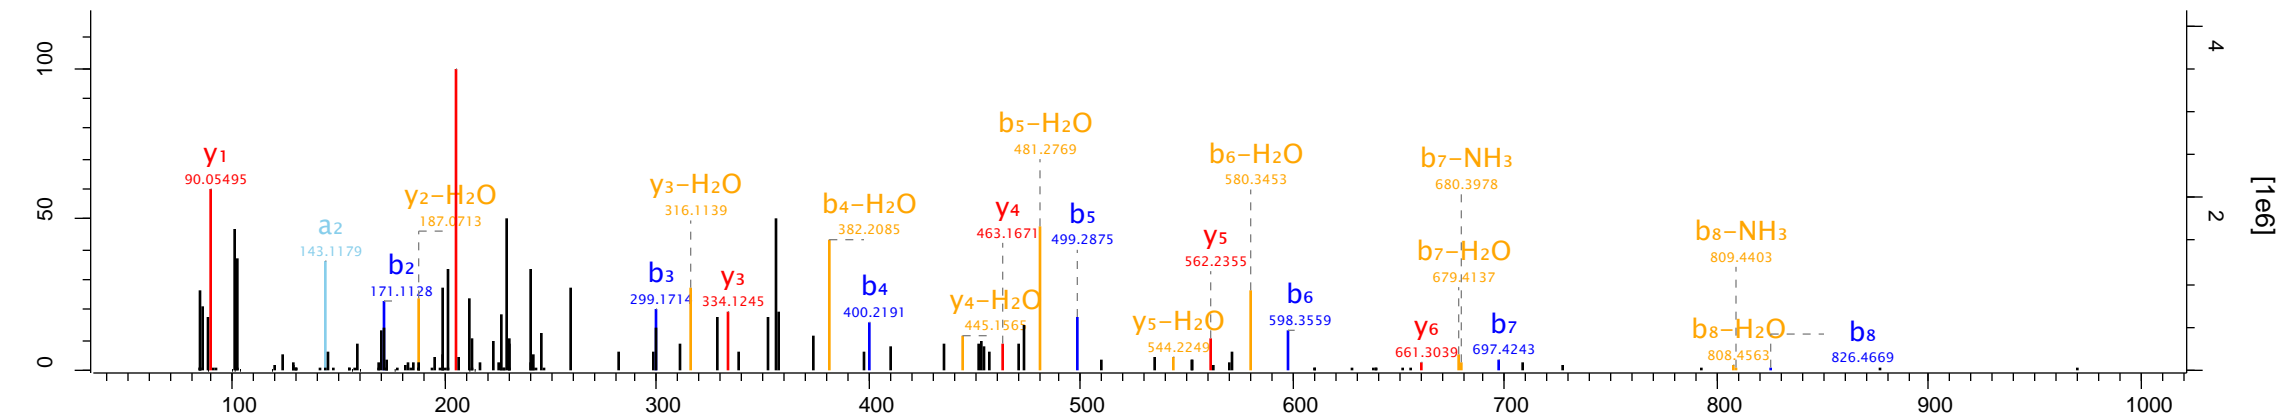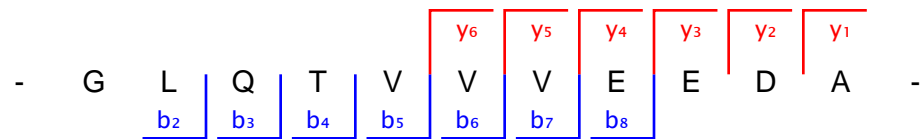



| Raw file                          | Scan | Method    | Score | m/z    | Gene names  |
|-----------------------------------|------|-----------|-------|--------|-------------|
| 20140602_QEp4_FaHo_SA_parental_01 | 6375 | FTMS; HCD | 91.91 | 394.25 | RPL7A;RPL7B |

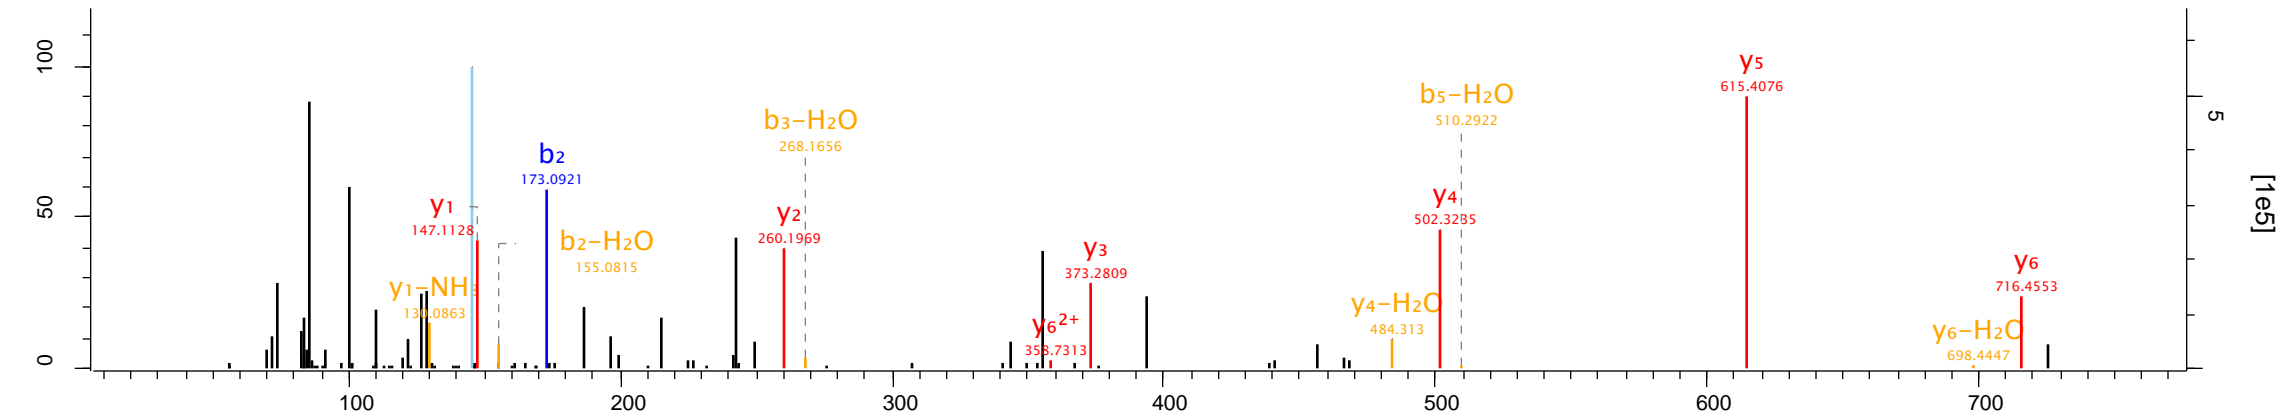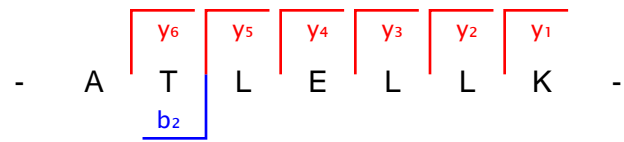

| Raw file                          | Scan | Method    | Score  | m/z    | Gene names |
|-----------------------------------|------|-----------|--------|--------|------------|
| 20140602_QEp4_FaHo_SA_parental_01 | 7691 | FTMS; HCD | 113.93 | 579.83 | SSS1       |

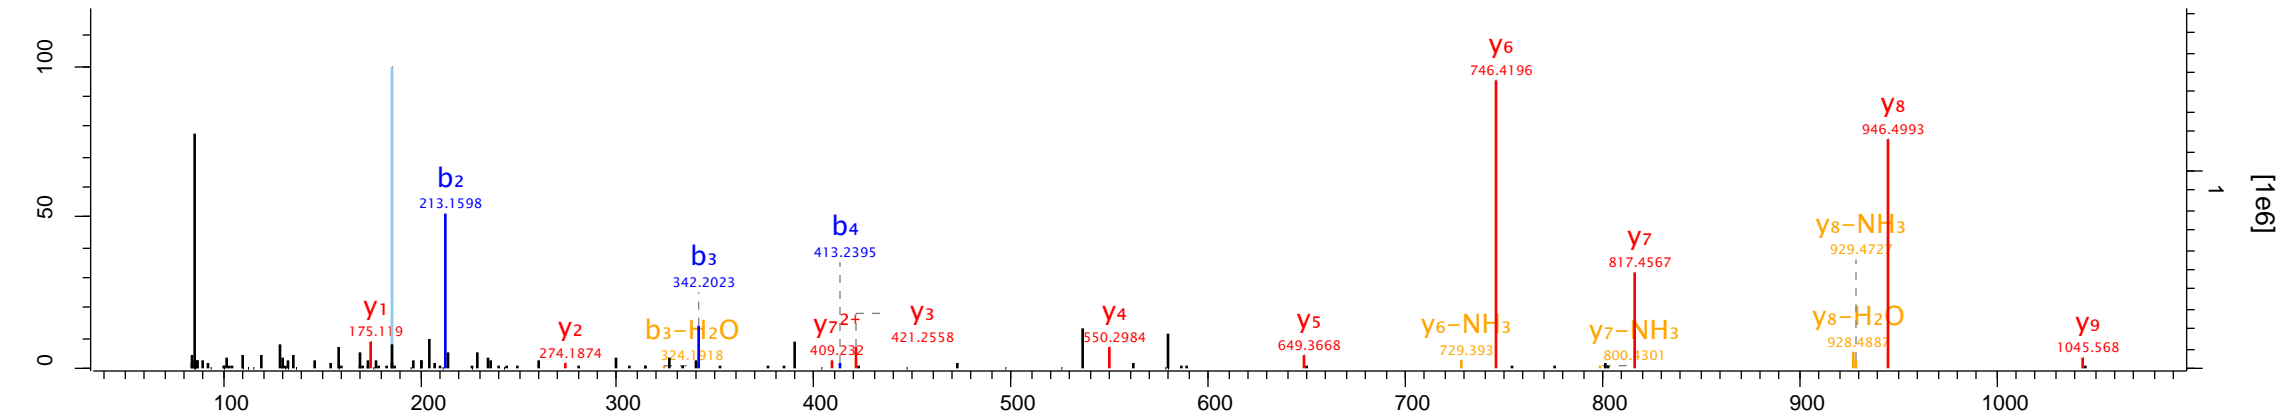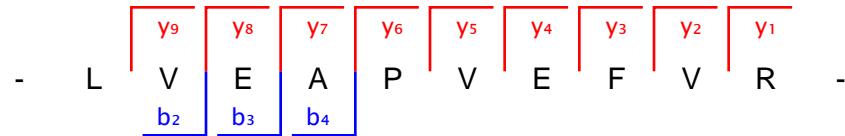

Raw file

Scan Method Score m/z Gene names

20140602\_QEp4\_FaHo\_SA\_parental\_02

1683 FTMS; HCD 87.25 431.23 TY1A-PL;TY1A-LR2;TY1A-ER1;TY1A-DR6;TY1B-OL;TY1B-LR4;TY1B-ML2;TY1B-PR3;TY1B-PL;TY1B-LR2;TY1B-DR6

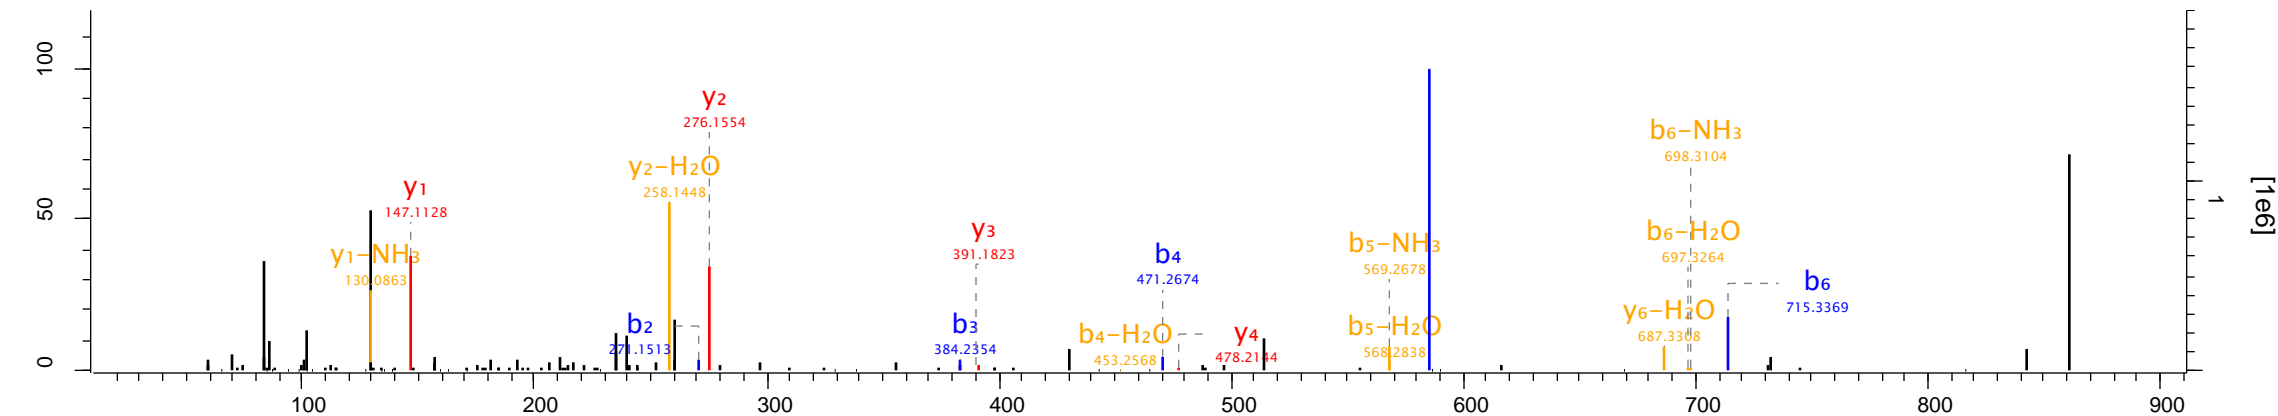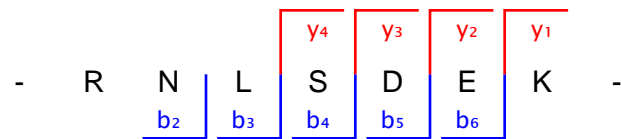

| Raw file                          | Scan | Method    | Score | m/z    | Gene names    |
|-----------------------------------|------|-----------|-------|--------|---------------|
| 20140602_QEp4_FaHo_SA_parental_02 | 2081 | FTMS; HCD | 30.57 | 343.85 | RPL13B;RPL13A |

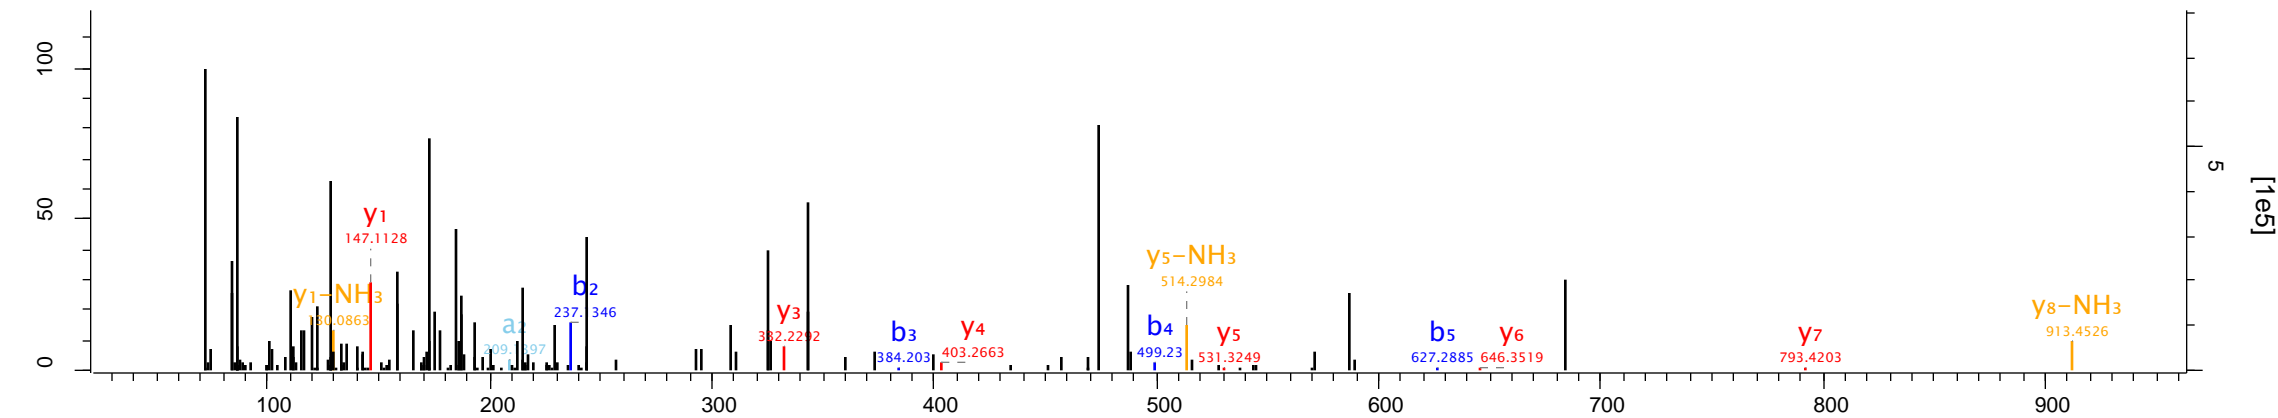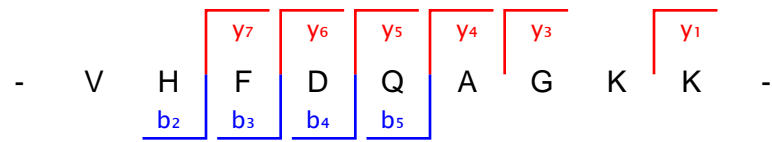

Raw file

Scan Method Score m/z Gene names

20140602\_QEp4\_FaHo\_SA\_parental\_02

3361 FTMS; HCD 94.41 367.21 TY1B-ML1;TY1B-BR;TY1B-H;TY1B-MR2;TY1B-OR;TY1B-PR2;TY1B-DR5;TY1B-JR2;TY1B-NL1;TY1B-PR3;TY1B-BL;TY1B-MR1

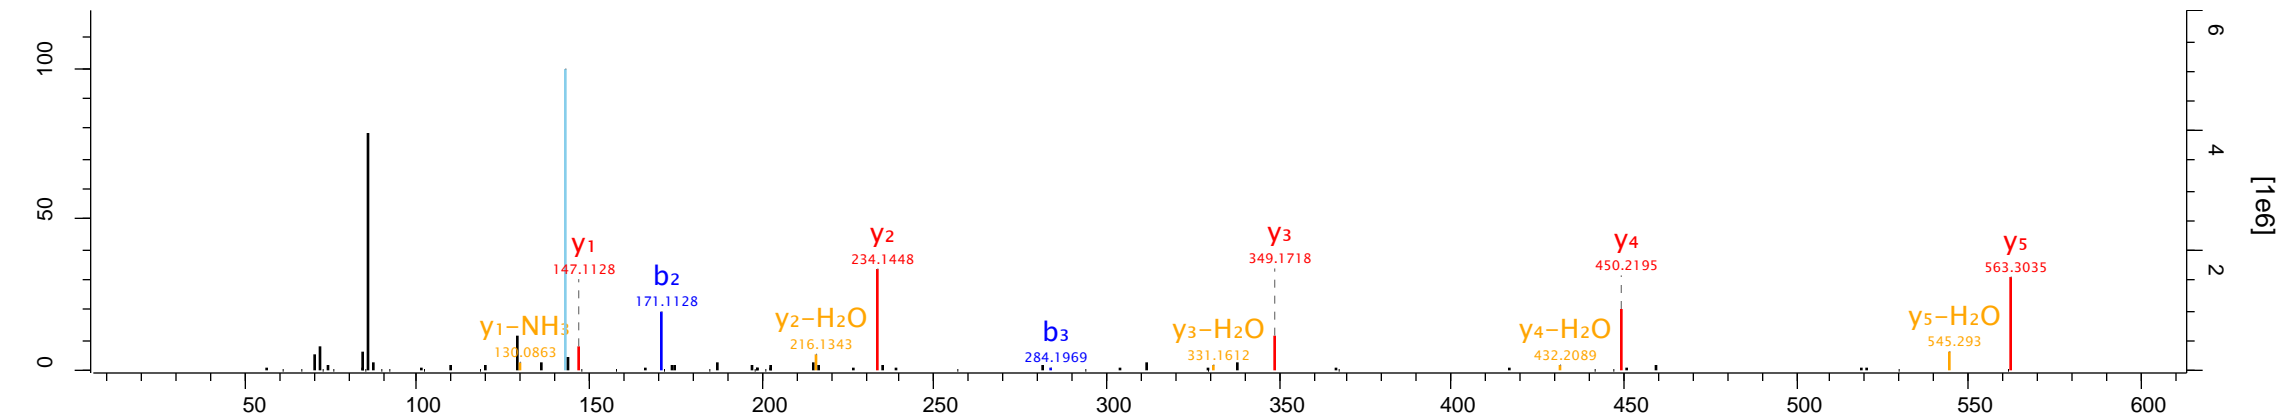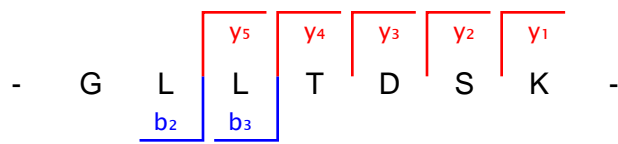

20140602\_QEp4\_FaHo 35 FTMSn 1470558.TY1B-ML1;TY1B-BR;TY1B-H;TY1B-MR2;TY1B-OR;TY1B-DR1;TY1B-NL2;TY1B-PR2;TY1B-DR5;TY1B-PR1;TY1B-JR2;TY1B-NL1;TY2B-C;TY1B-OL;TY1B-LR4;TY1B-ML2;TY1B-DR3;T

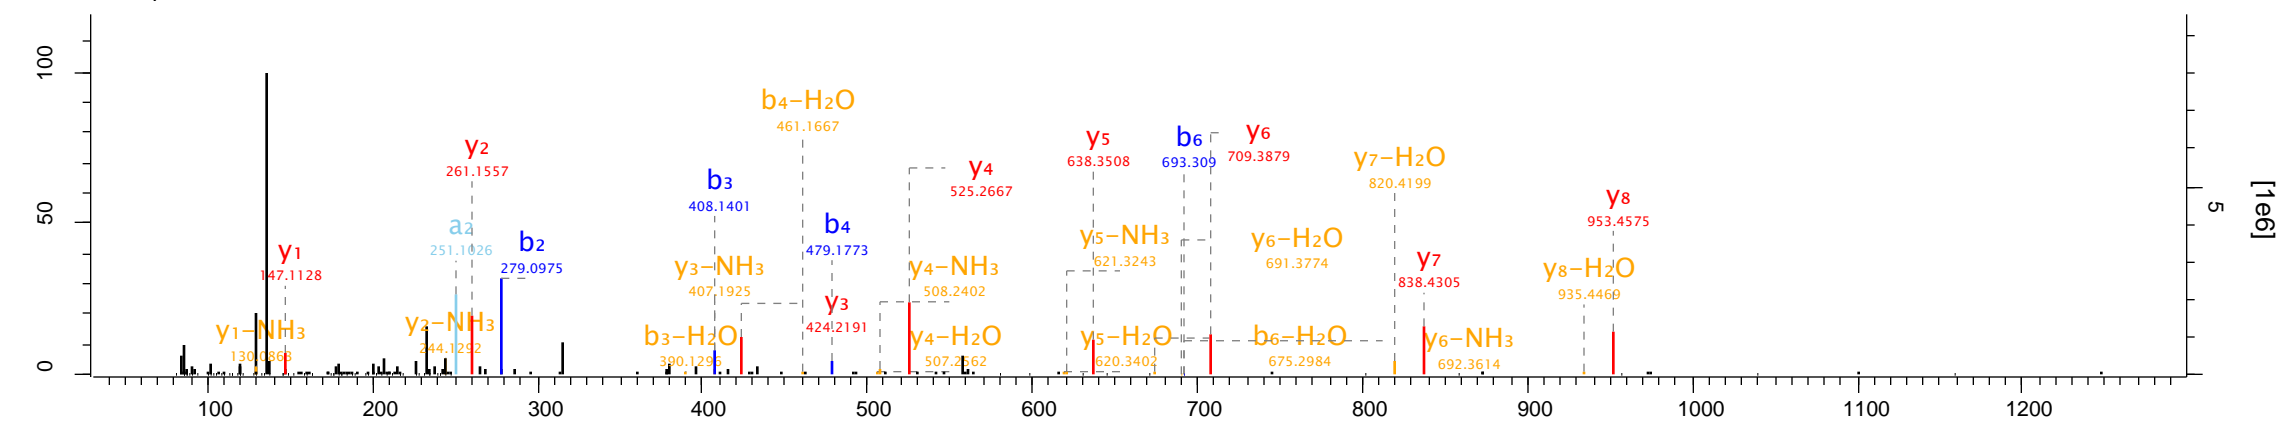

- Y y8 y7 y6 y5 y4 y3 y2 y1 -  
b2 b3 b4 b6 -  
 - Y D E A I T Y N K -

Raw file

Scan Method

Score m/z

Gene names

20140602\_QEp4\_FaHo\_SA\_pare 3563 FTMS; 105.2 381.2 TY1B-NL2;TY1B-PR1;TY2B-C;TY1B-OL;TY1B-LR4;TY1B-ML2;TY1B-DR3;TY1B-PL;TY1B-LR2;TY1B-DR6;TY1B-A;TY2B-B;TY2B-GR2;TY2B-F;TY2B-GR1;TY2B-OR1

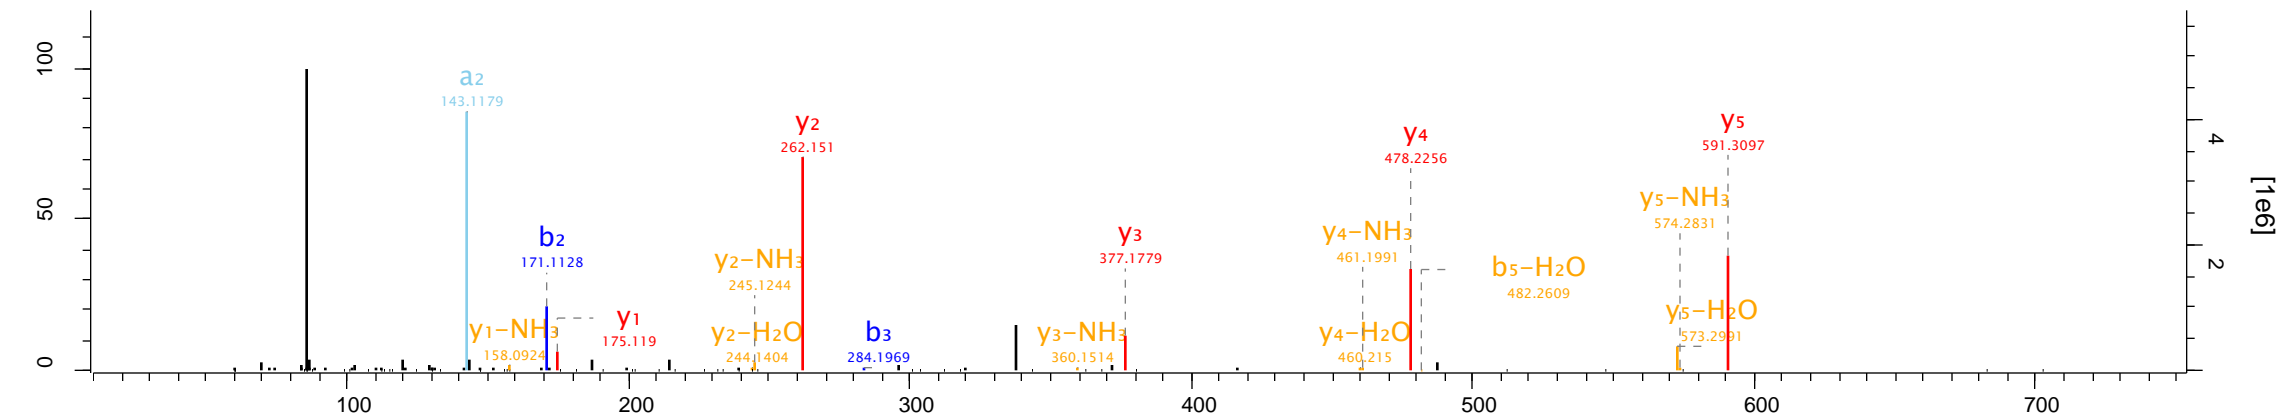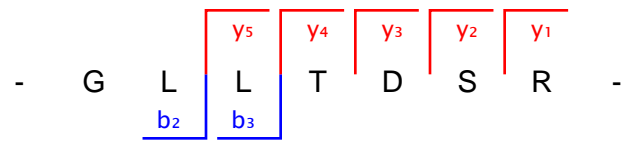

Raw file

Scan

Method

Score

m/z

Gene names

20140602\_QEp4\_FaHo\_SA\_parental\_02

4199

FTMS; HCD

138.99

497.88

TY1B-JR2;TY1B-OL;TY1B-LR4;TY1B-ML2;TY1B-PL;TY1B-LR2;TY1B-DR6

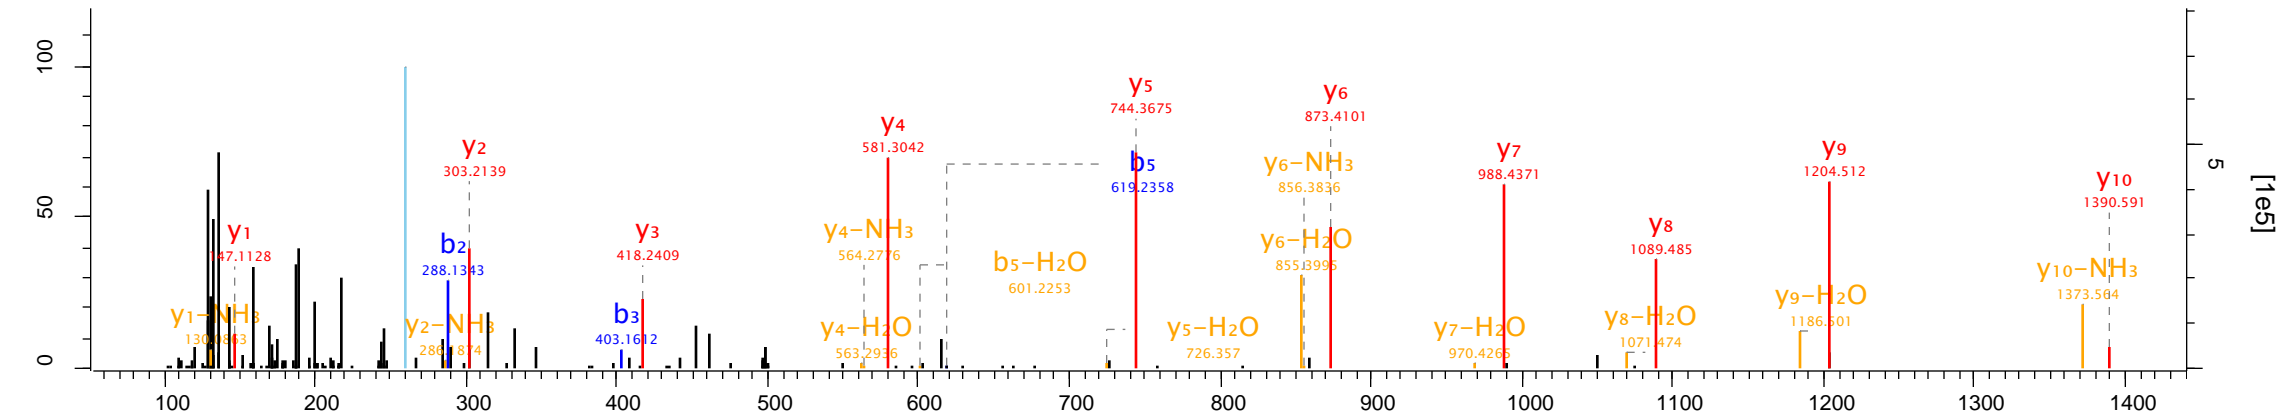

- T W D T D E Y Y D R K -

b<sub>2</sub> b<sub>3</sub> b<sub>5</sub>

y<sub>10</sub> y<sub>9</sub> y<sub>8</sub> y<sub>7</sub> y<sub>6</sub> y<sub>5</sub> y<sub>4</sub> y<sub>3</sub> y<sub>2</sub> y<sub>1</sub>



| Raw file                          | Scan | Method    | Score | m/z    | Gene names |
|-----------------------------------|------|-----------|-------|--------|------------|
| 20140602_QEp4_FaHo_SA_parental_02 | 4997 | FTMS; HCD | 82.64 | 695.85 | TY1B-PR3   |

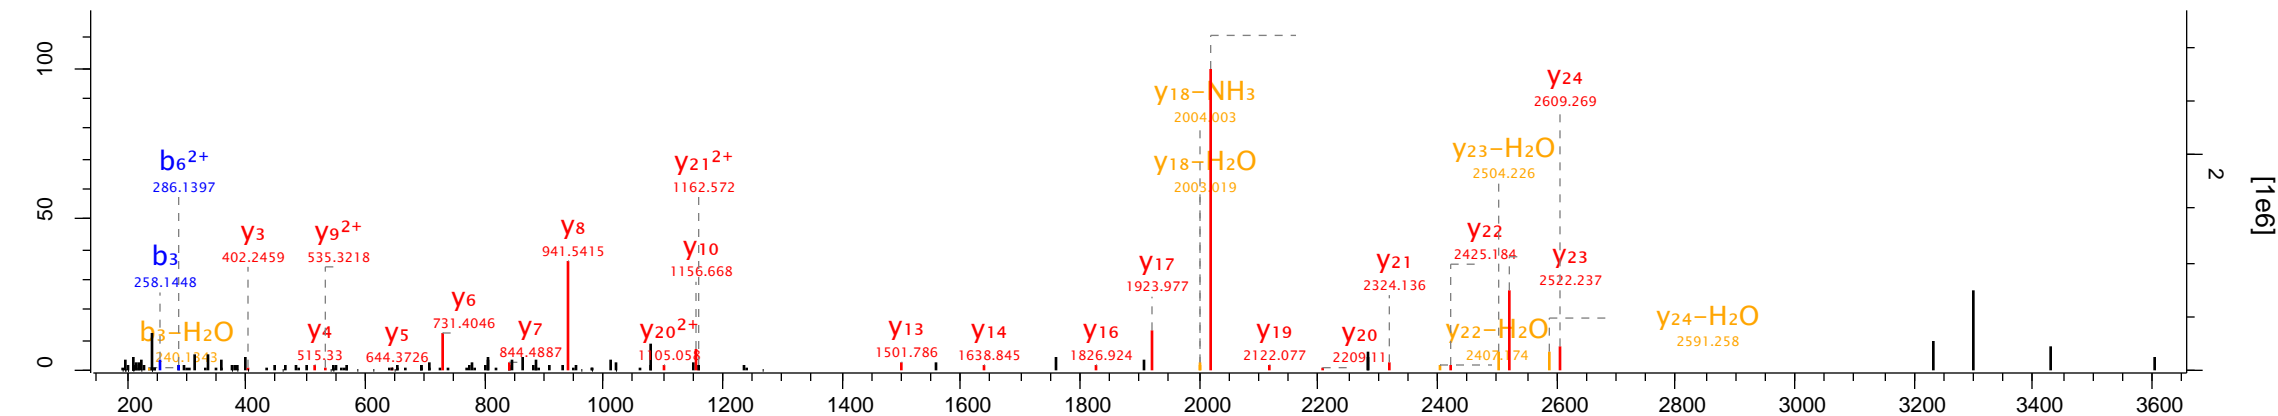

- A V S P T D S T P P S T H T E D S K P I S E I N L R -

Fragmentation sites are indicated by red brackets above the sequence, labeled y24, y23, y22, y21, y20, y19, y18, y17, y16, y14, y13, y10, y9<sup>2+</sup>, y8, y7, y6, y5, y4, y3. Blue brackets below the sequence indicate b3 and b6<sup>2+</sup> fragments.

Raw file Scan Method Score m/z Gene names

20140602\_QEp4\_FaHo\_SA\_parental\_02 7727 FTMS; HCD 120.93 781.63 TY1B-ML1;TY1B-H;TY1B-NL2;TY1B-PR2;TY1B-DR5;TY1B-PR1;TY1B-OL;TY1B-LR4;TY1B-ML2;TY1B-PR3;TY1B-PL;TY1B-LR2;TY1B-DR6

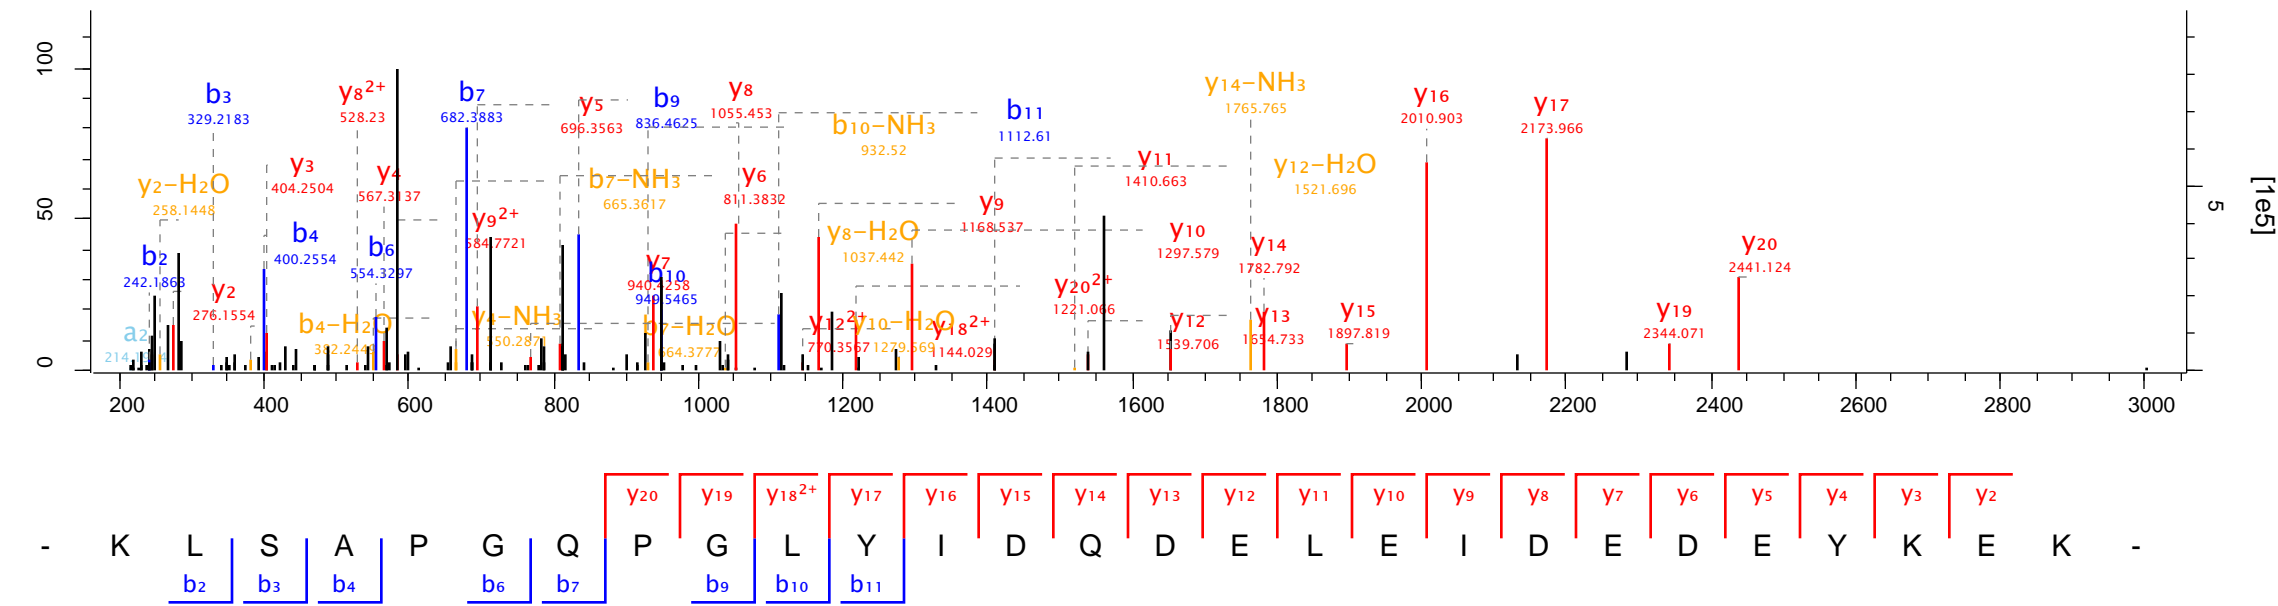

Raw file Scan Method Score m/z Gene names

20140602\_QEp4\_FaHo\_SA\_parental\_02 9615 FTMS; HCD 67.65 678.68 GCN20

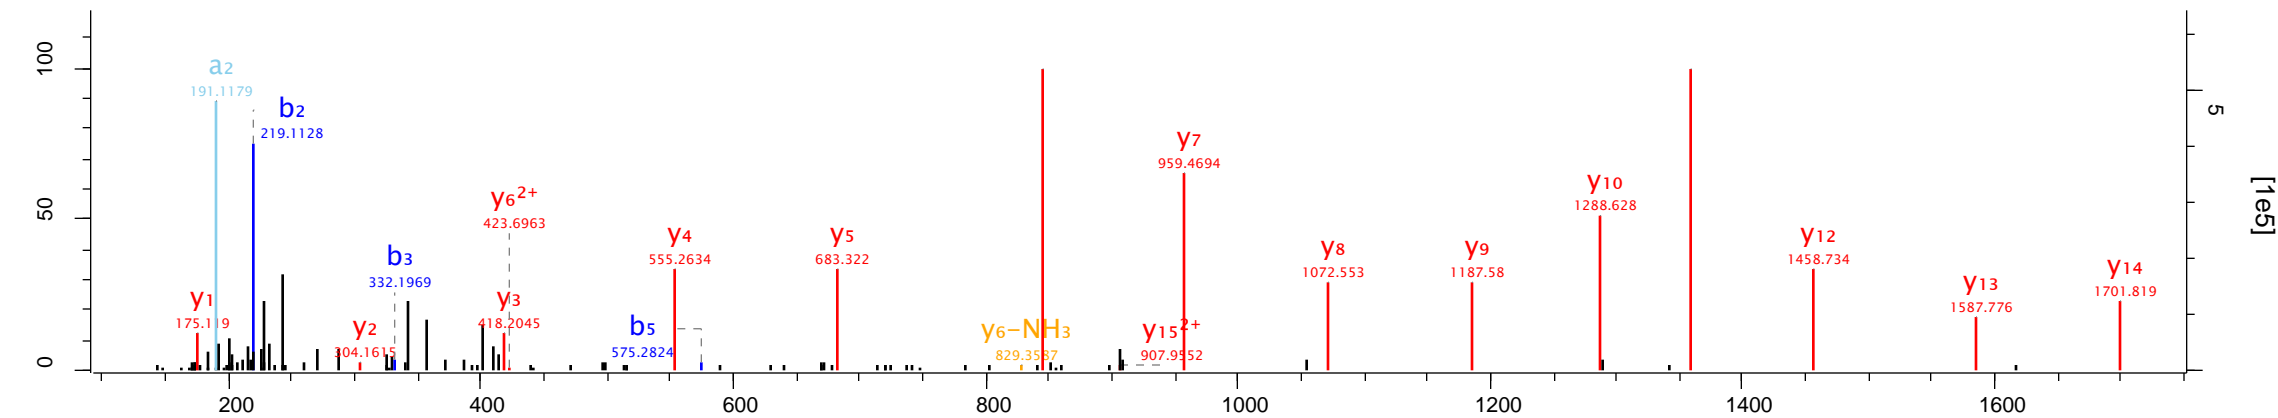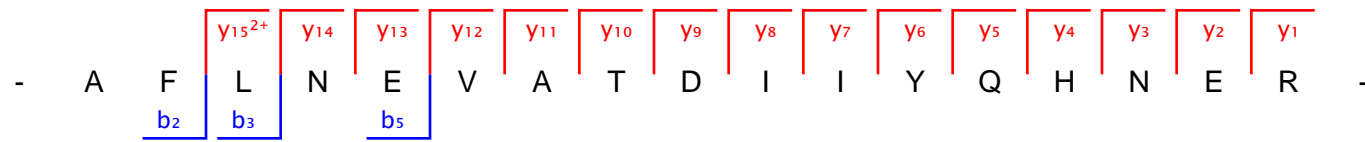

Raw file Scan Method Score m/z Gene names

20140602\_QEp4\_FaHo\_SA\_parent: 7684 FTMS; 159.94 660.3; TY1B-ML1;TY1B-BR;TY1B-H;TY1B-MR2;TY1B-OR;TY1B-PR2;TY1B-DR5;TY1B-JR2;TY1B-NL1;TY1B-OL;TY1B-ML2;TY1B-PR3;TY1B-PL;TY1B-LR2;TY1B-BL;TY

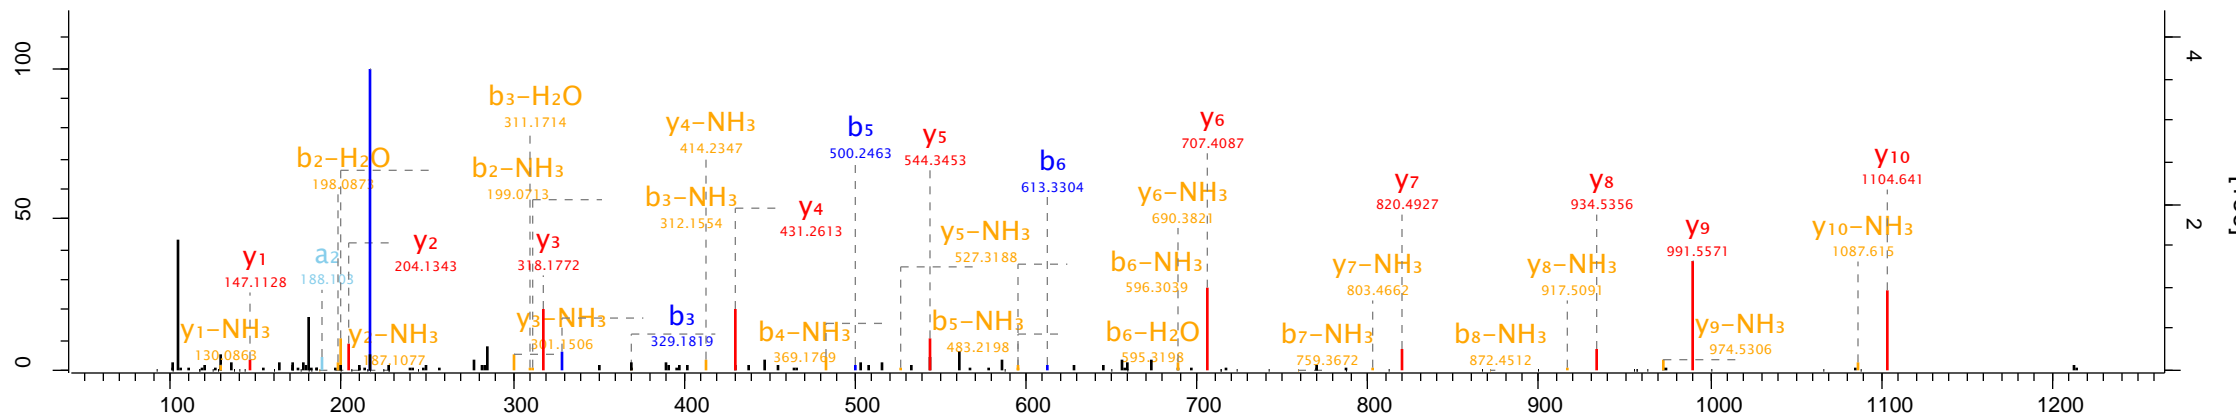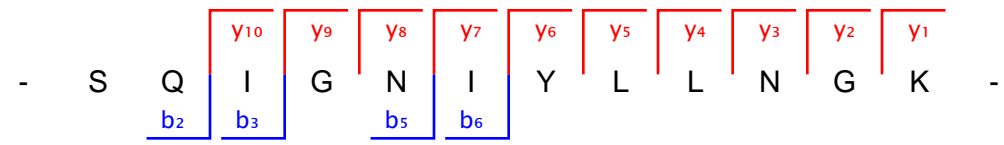

Raw file 20140602\_QEp4\_FaHo\_SA\_PHO23\_01 Scan 3609 Method FTMS; HCD Score 169.79 m/z 772.4 Gene names RPS14B;RPS14A

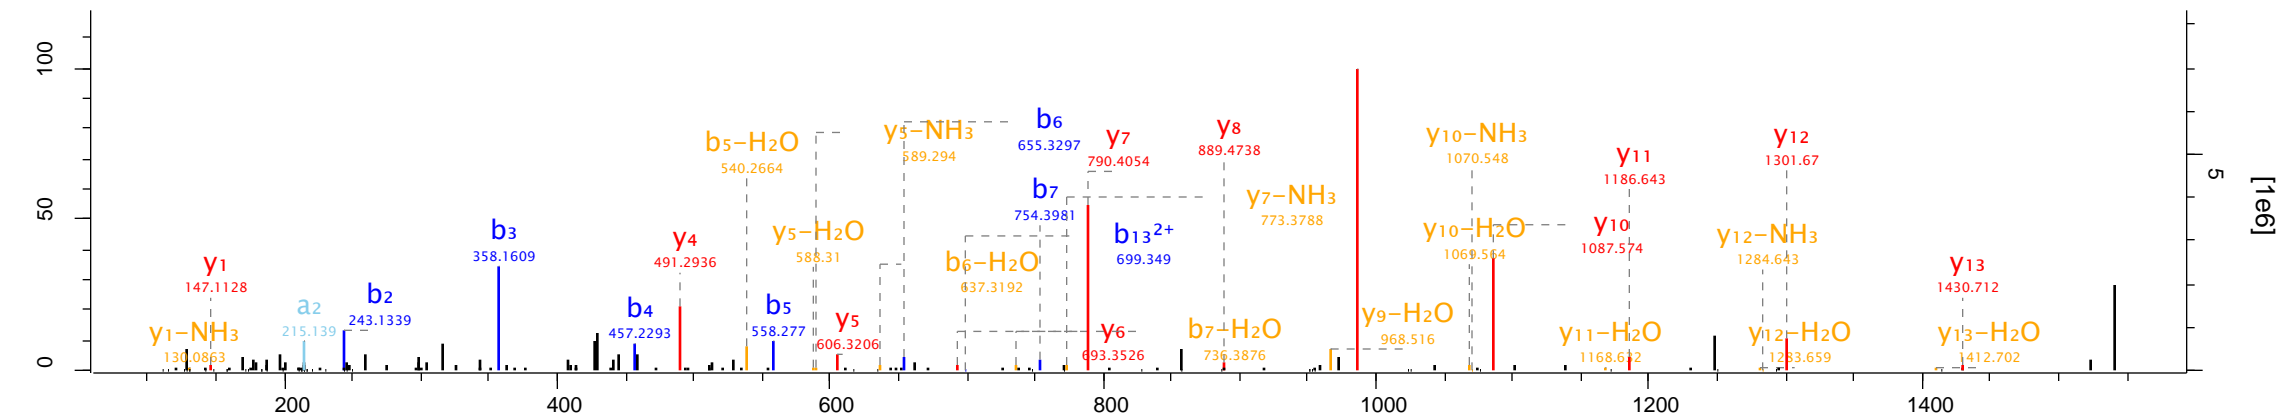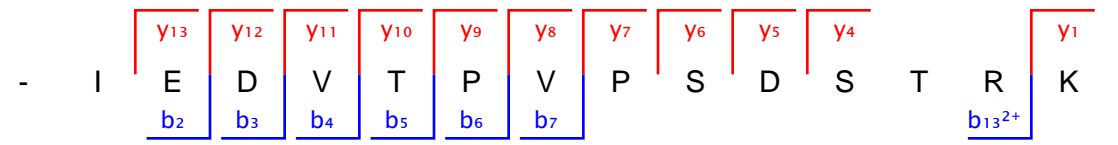

Raw file

Scan Method Score m/z Gene names

20140602\_QEp4\_FaHo\_SA\_PHO23\_01

3747 FTMS; HCD 115.57 665.85 RPO41

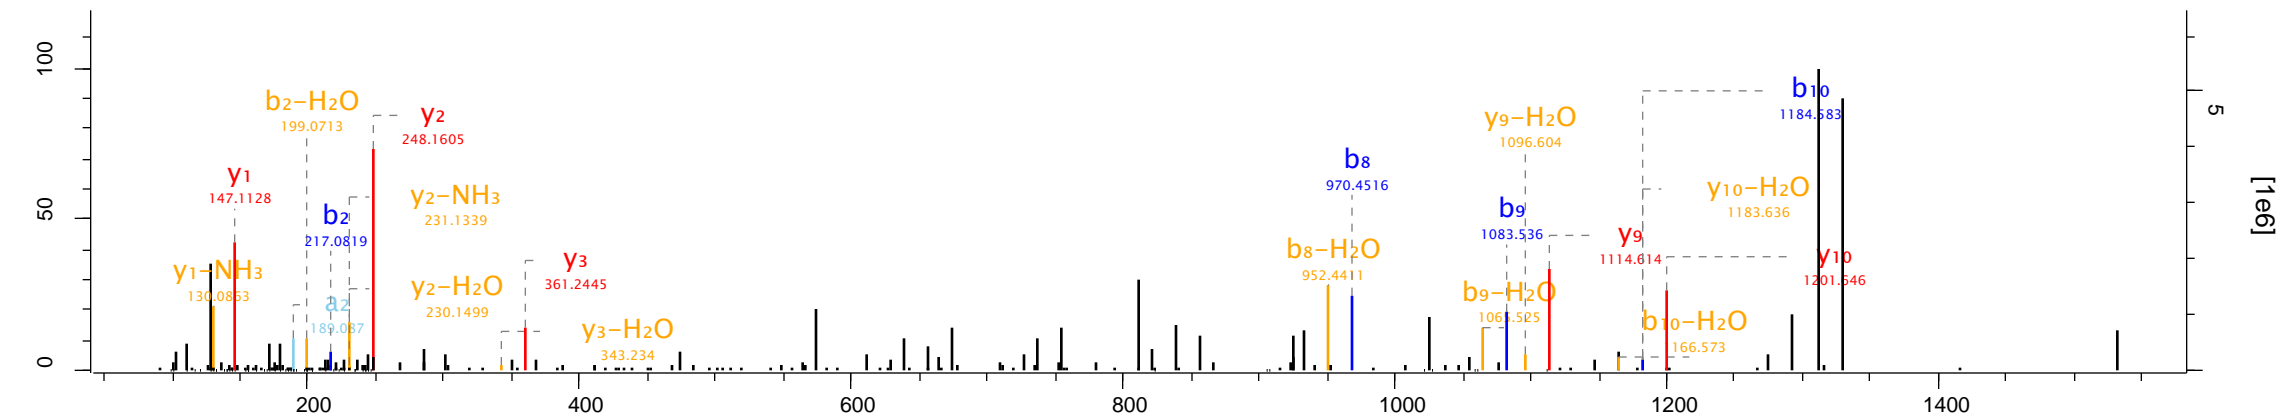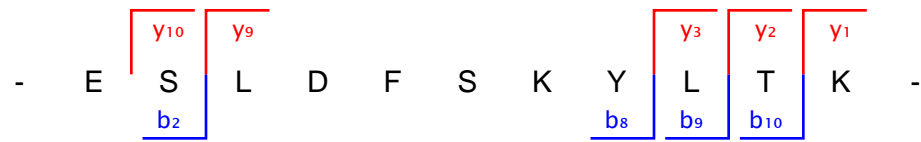

| Raw file                       | Scan | Method    | Score  | m/z    | Gene names                |
|--------------------------------|------|-----------|--------|--------|---------------------------|
| 20140602_QEp4_FaHo_SA_PHO23_01 | 5074 | FTMS; HCD | 158.98 | 690.33 | TY1B-BL;TY1B-MR1;TY1A-MR1 |

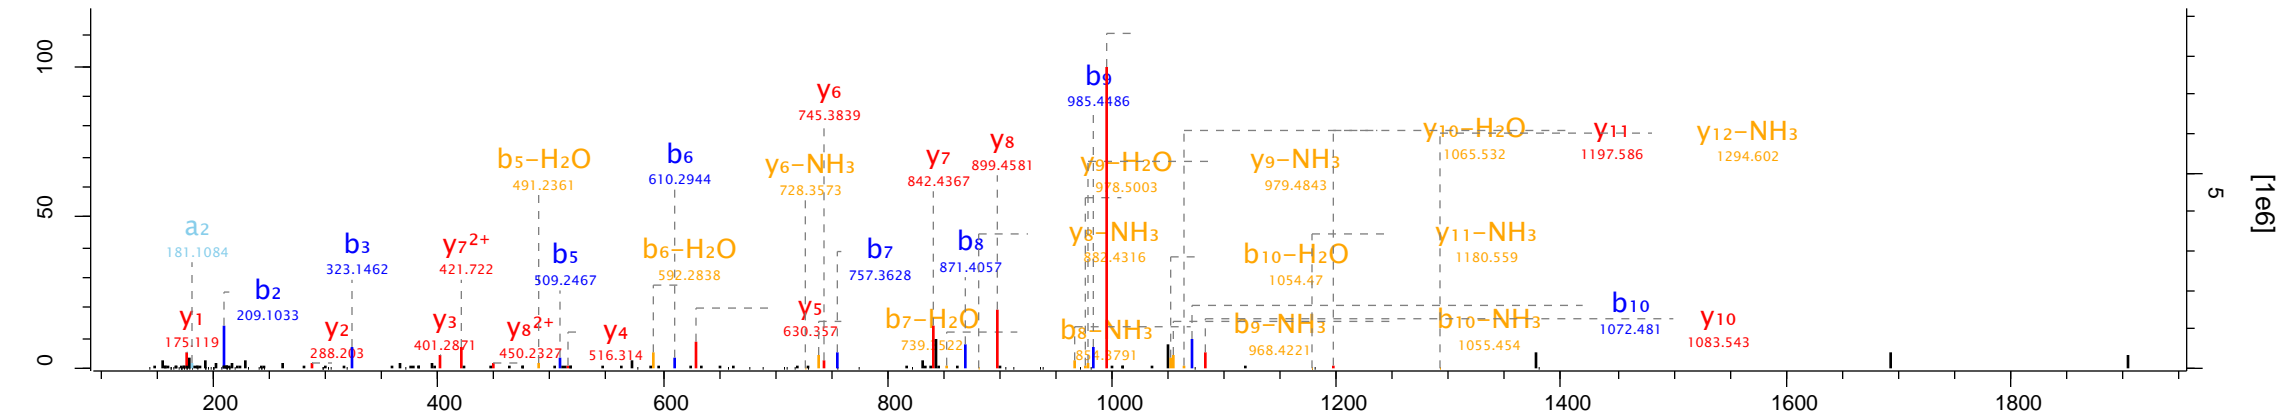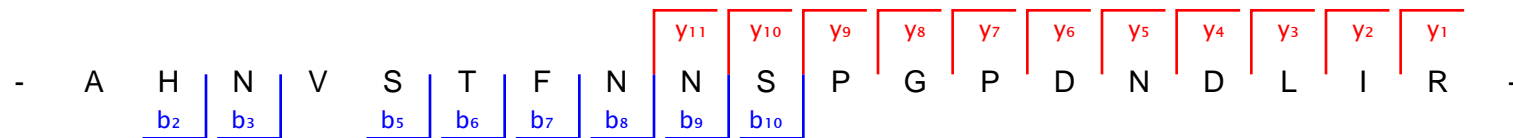

Raw file Scan Method Score m/z Gene names

20140602\_QEp4\_FaHo\_SA\_PHO23\_01 5456 FTMS; HCD 221.83 890.41 TY1B-OL

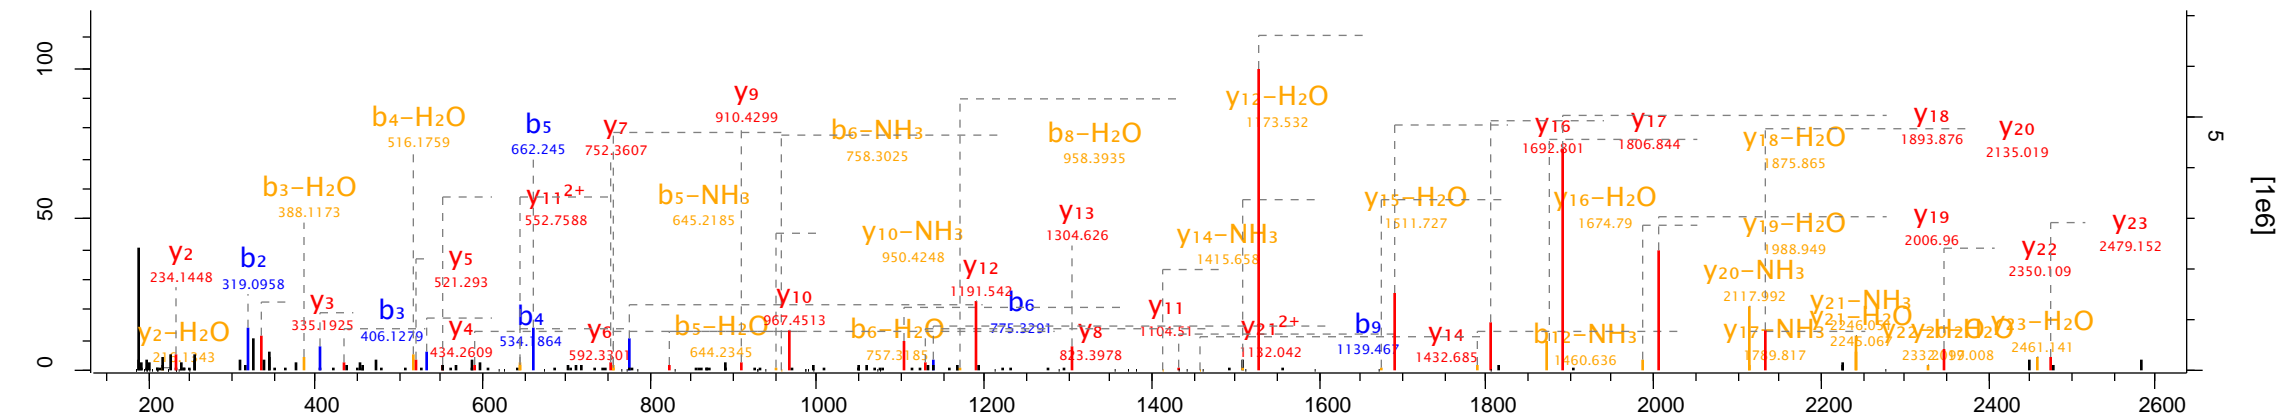

ac ox M E S Q Q L S N Y P Q I S H G S A C A S V T S K -

b<sub>2</sub> b<sub>3</sub> b<sub>4</sub> b<sub>5</sub> b<sub>6</sub> b<sub>9</sub>



Raw file

20140602\_QEp4\_FaHo\_SA\_PHO23\_01

Scan Method Score m/z Gene names

9876 FTMS; HCD 140.45 985.51 RPL13A

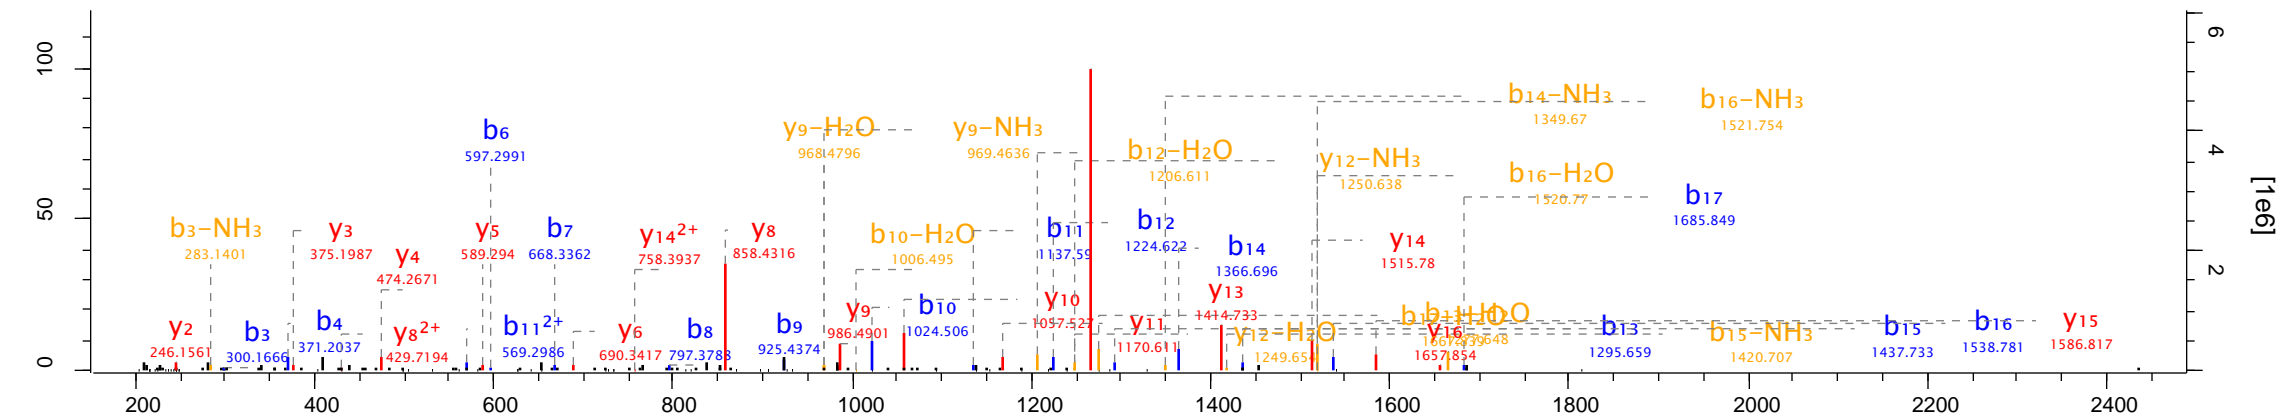

- N G K A P E A E Q V L S A A A T F P I A Q P A T D V E A

b<sub>3</sub> b<sub>4</sub> b<sub>6</sub> b<sub>7</sub> b<sub>8</sub> b<sub>9</sub> b<sub>10</sub> b<sub>11</sub> b<sub>12</sub> b<sub>13</sub> b<sub>14</sub> b<sub>15</sub> b<sub>16</sub> b<sub>17</sub> y<sub>16</sub> y<sub>15</sub> y<sub>14</sub> y<sub>13</sub> y<sub>12</sub> y<sub>11</sub> y<sub>10</sub> y<sub>9</sub> y<sub>8</sub> y<sub>6</sub> y<sub>5</sub> y<sub>4</sub> y<sub>3</sub> y<sub>2</sub>

Raw file 20140602\_QEp4\_FaHo\_SA\_PHO23\_02 Scan 4954 Method FTMS; HCD Score 169.65 m/z 667.33 Gene names RPL13B;RPL13A

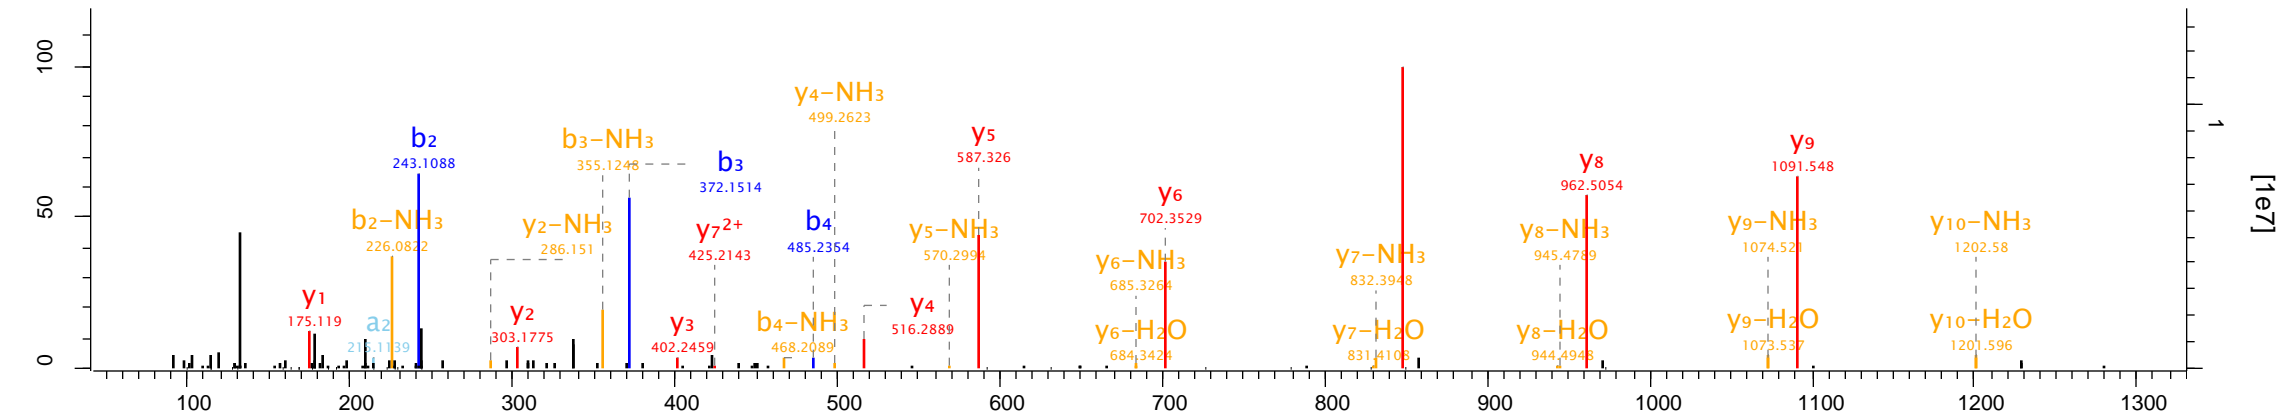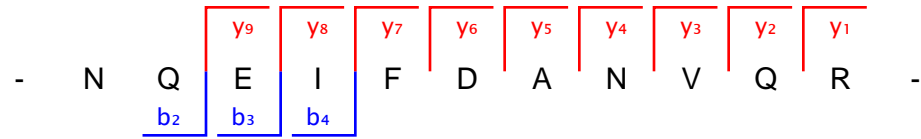

Raw file Scan Method Score m/z Gene names

20140602\_QEp4\_FaHo\_SA\_PHO23\_02 9130 FTMS; HCD 140.2 787.74 TOM22

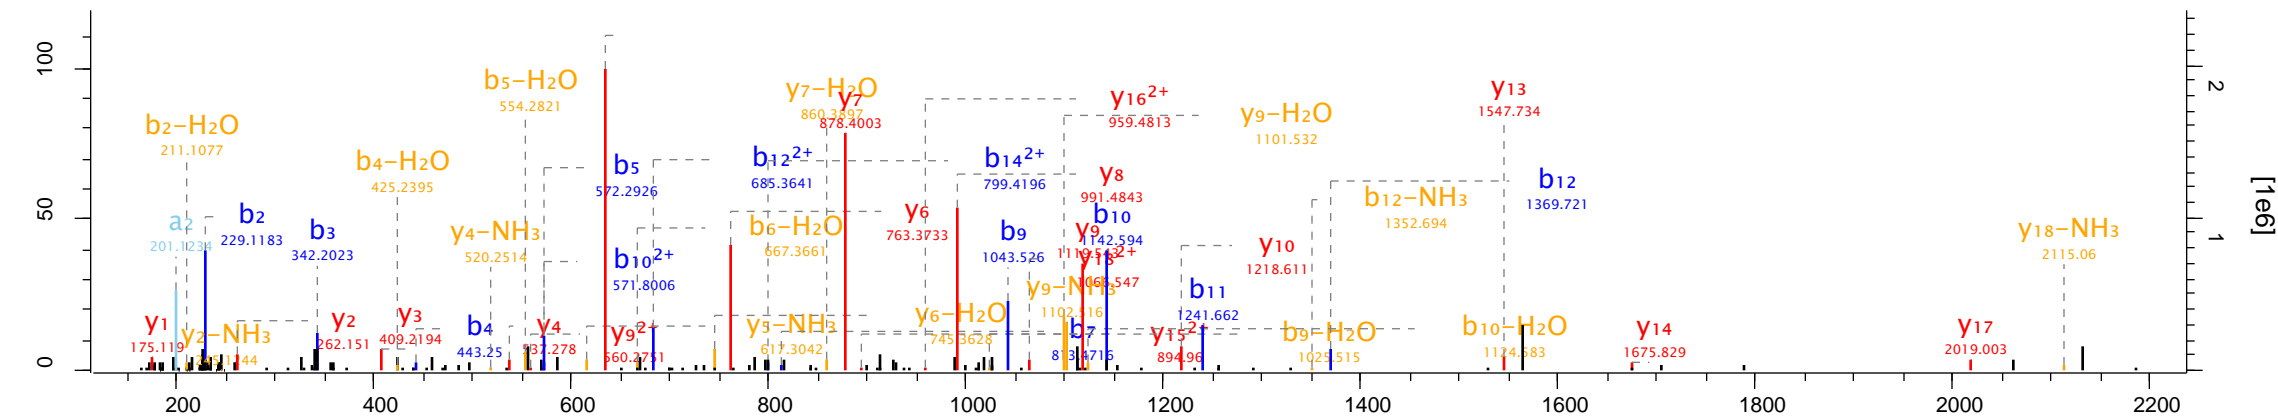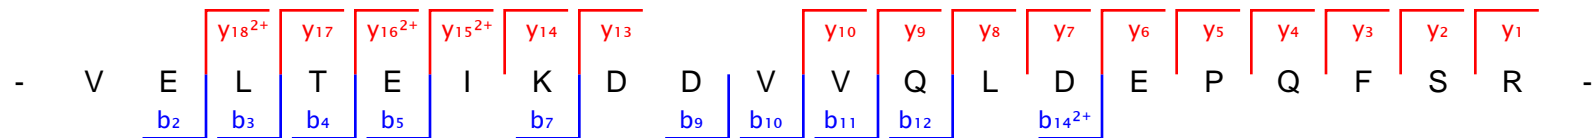

| Raw file                       | Scan | Method    | Score  | m/z    | Gene names |
|--------------------------------|------|-----------|--------|--------|------------|
| 20140602_QEp4_FaHo_SA_PHO23_03 | 3751 | FTMS; HCD | 133.86 | 518.24 | ARF1;ARF2  |

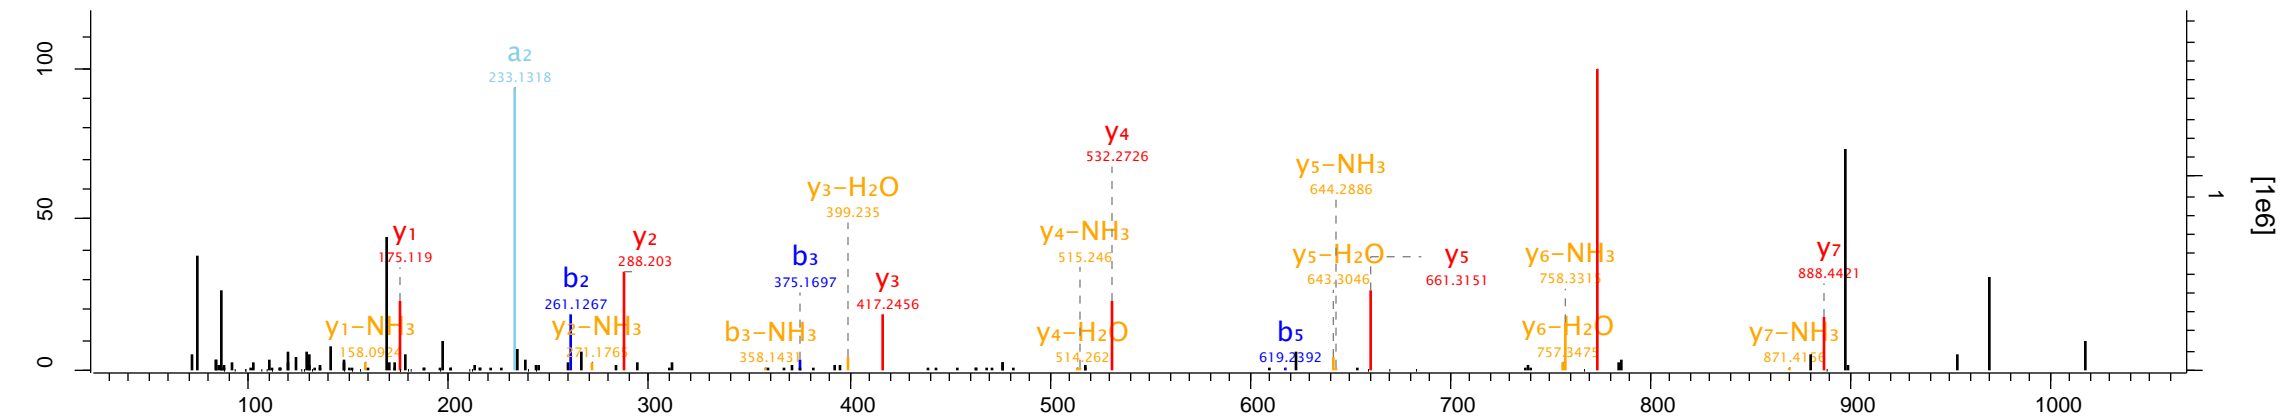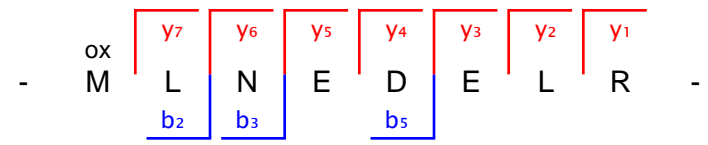

Raw file Scan Method Score m/z Gene names

20140602\_QEp4\_FaHo\_SA\_PHO23\_03 5581 FTMS; HCD 219.23 893.08 TY1B-BL

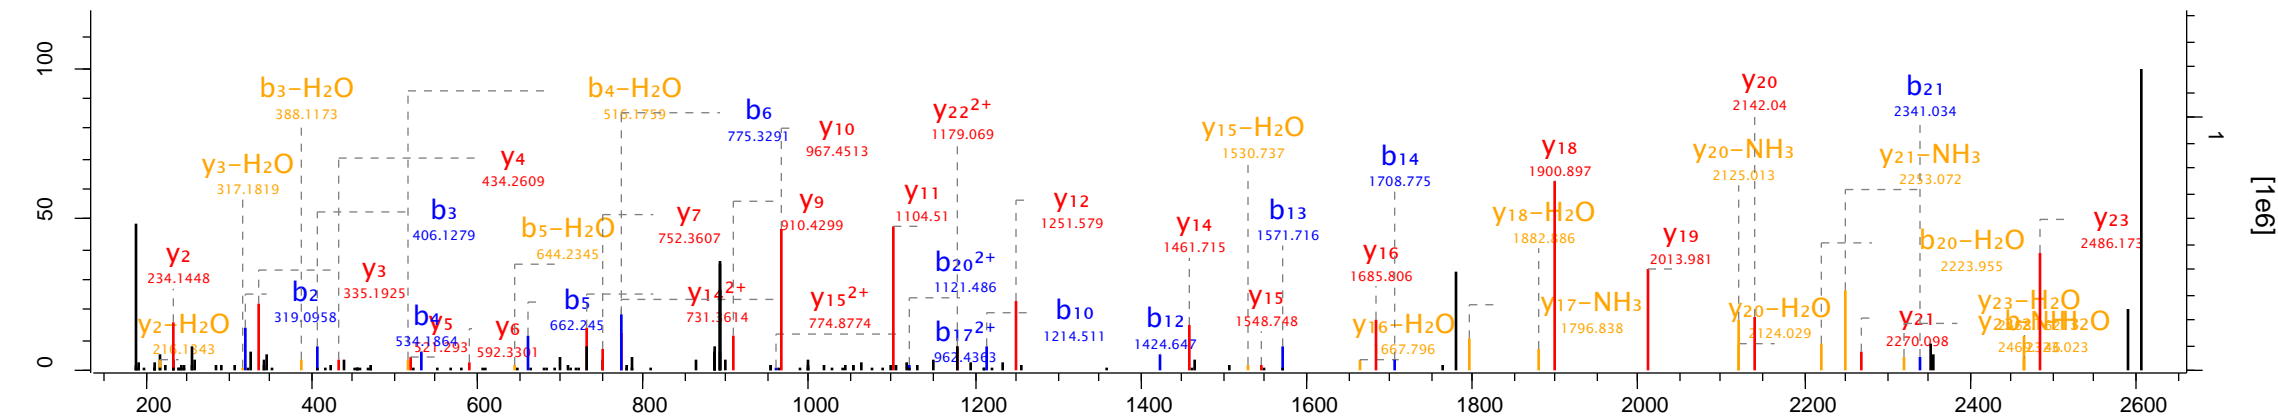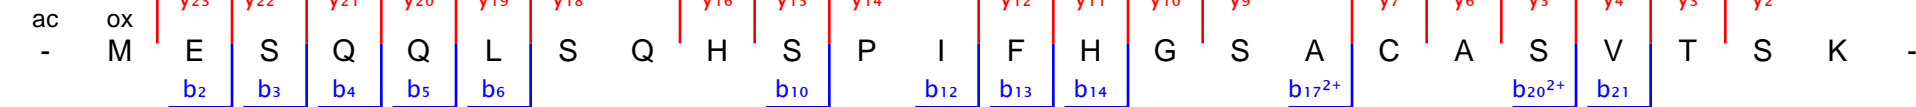

| Raw file                      | Scan | Method    | Score  | m/z    | Gene names    |
|-------------------------------|------|-----------|--------|--------|---------------|
| 20140602_QEp4_FaHo_SA_RCO1_02 | 2326 | FTMS; HCD | 175.88 | 505.25 | RPL17A;RPL17B |

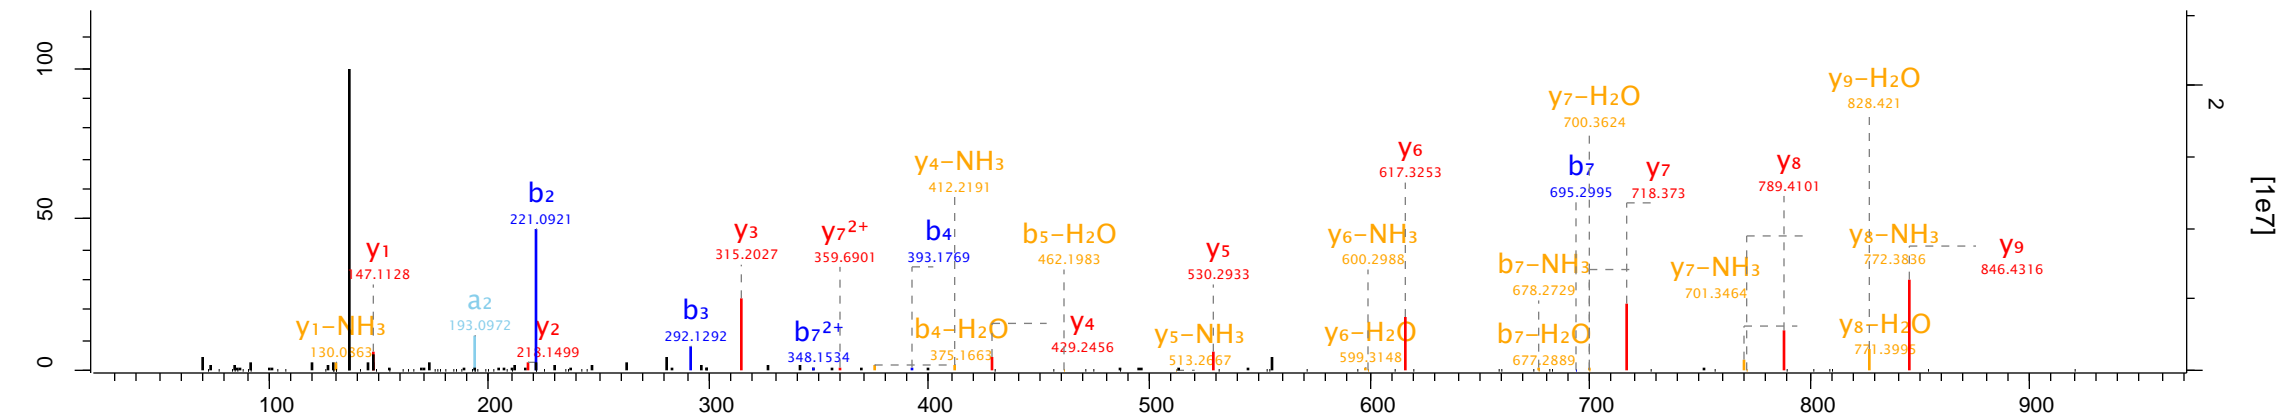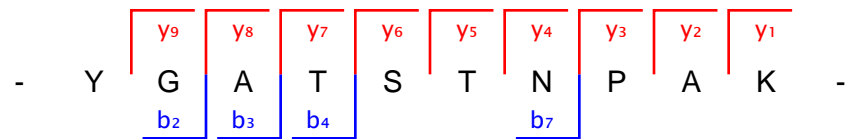

Raw file 20140602\_QEp4\_FaHo\_SA\_RCO1\_02 Scan 3957 Method FTMS; HCD Score 148.96 m/z 681.84 Gene names RPL36B;RPL36A

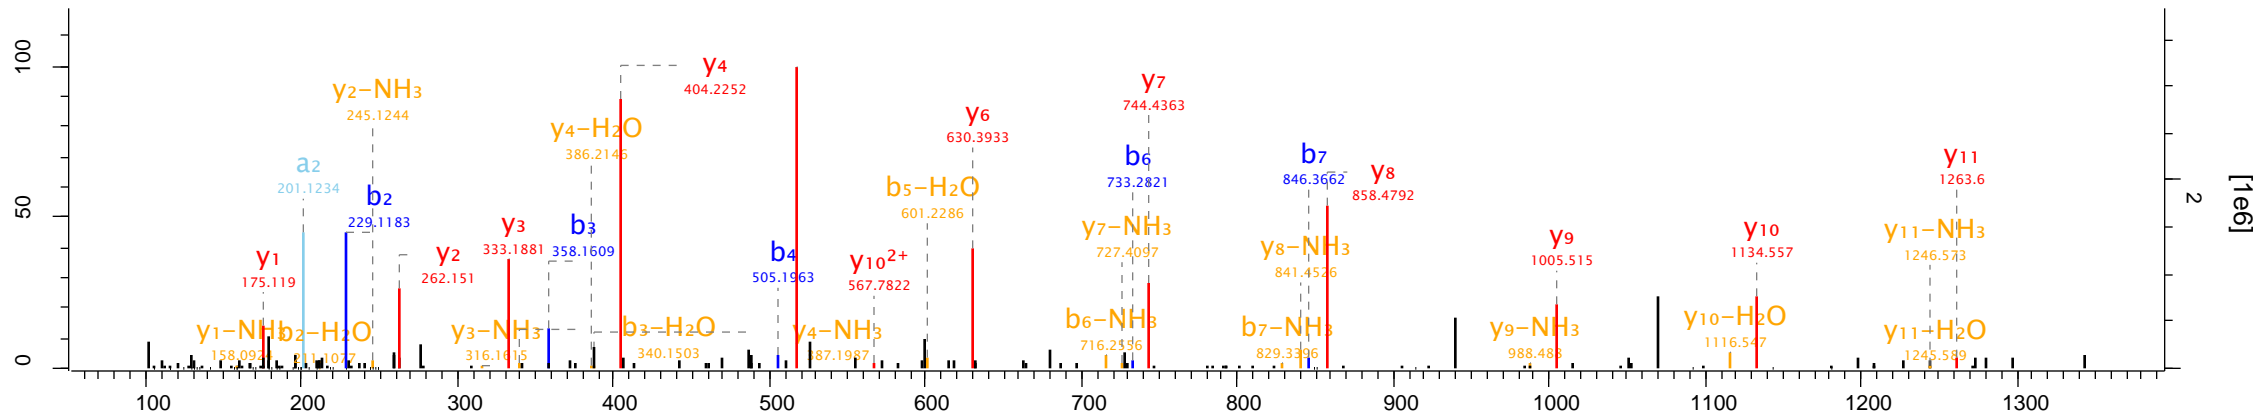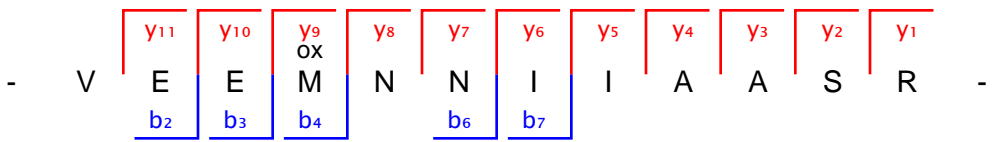

Raw file Scan Method Score m/z Gene names

20140602\_QEp4\_FaHo\_SA\_RCO1\_02 7234 FTMS; HCD 183.15 871.4 TY1B-PR3

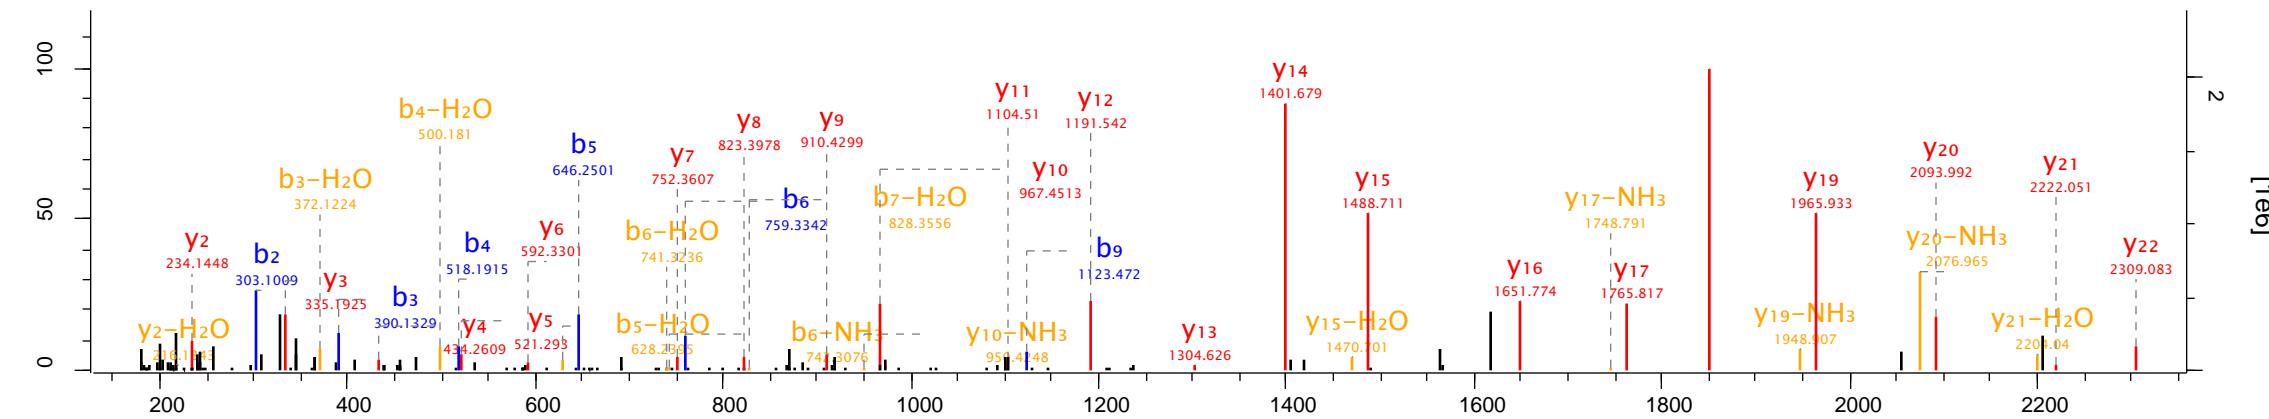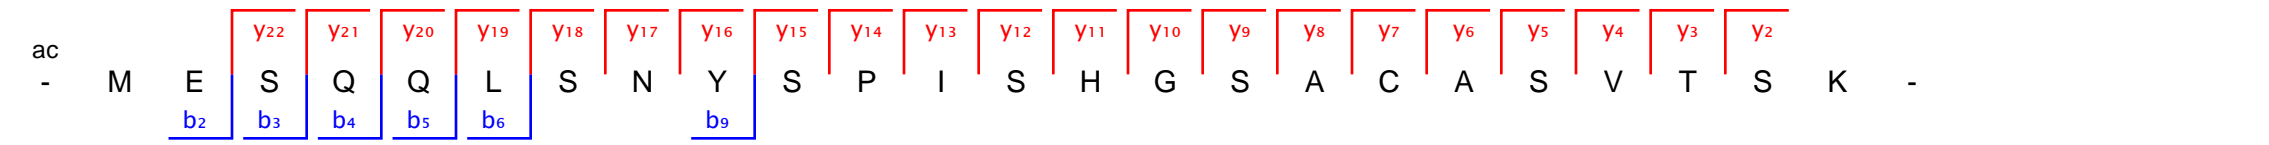



Raw file Scan Method Score m/z Gene names

20140602\_QEp4\_FaHo\_SA\_RCO1\_02 9347 FTMS; HCD 142.91 852.45 VMA2

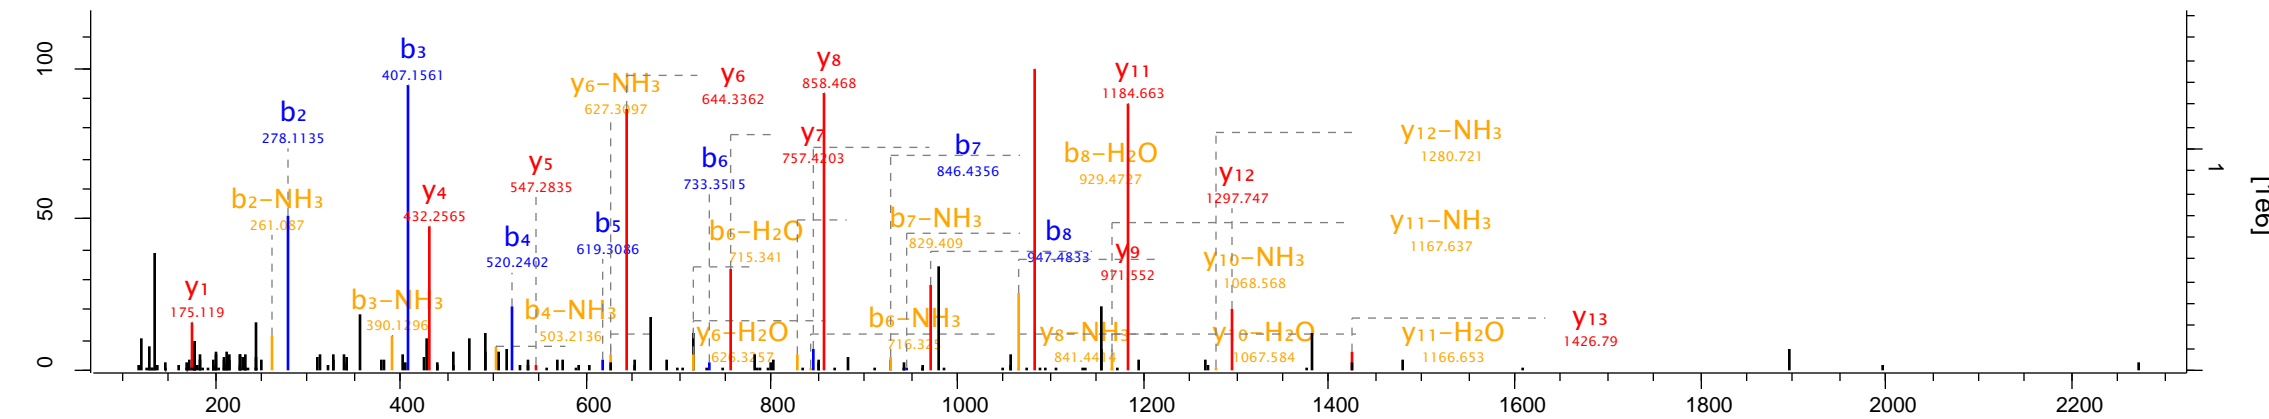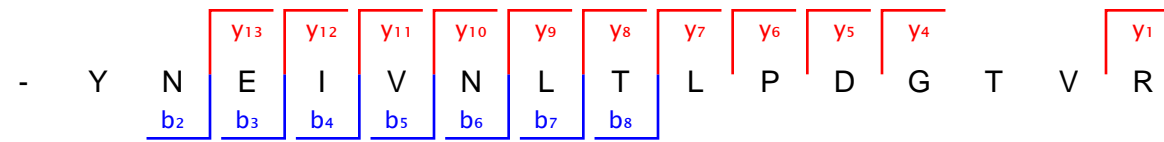

| Raw file                      | Scan | Method    | Score | m/z    | Gene names      |
|-------------------------------|------|-----------|-------|--------|-----------------|
| 20140602_QEp4_FaHo_SA_RCO1_03 | 2675 | FTMS; HCD | 90.37 | 569.29 | YHR212C;YAR060C |

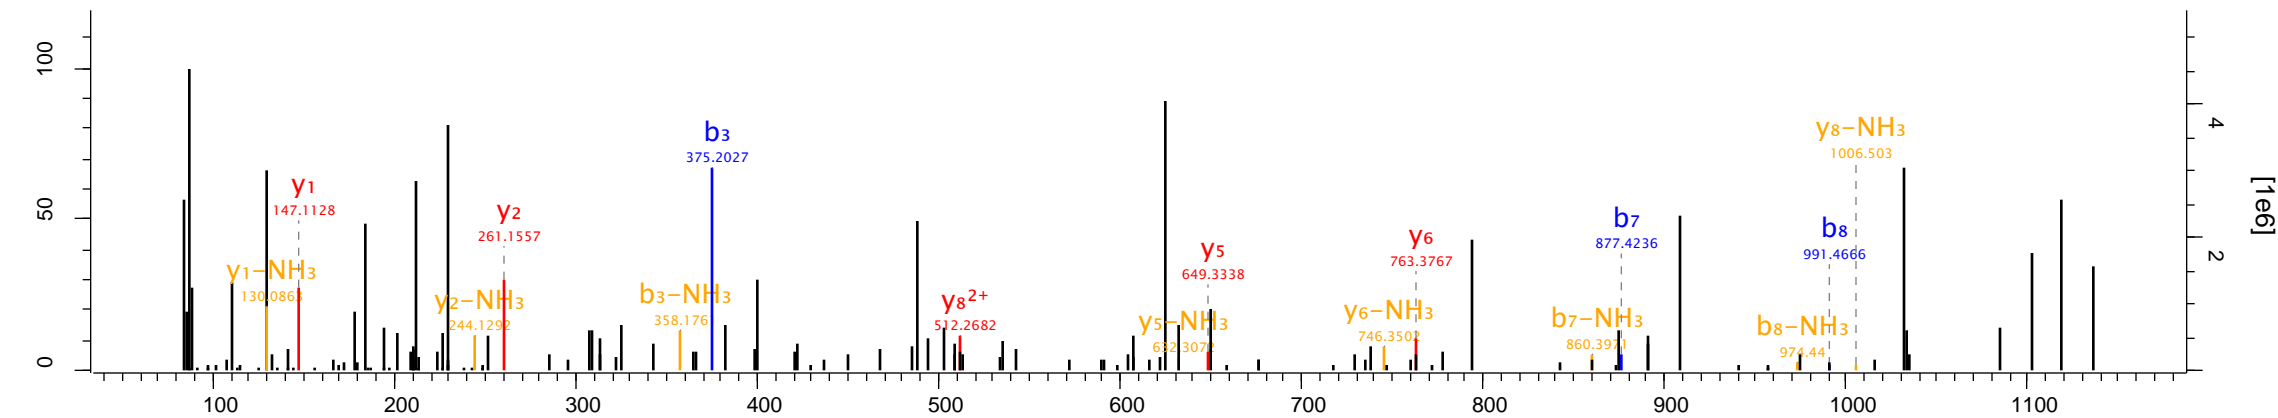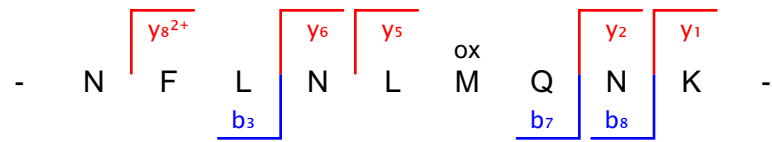

| Raw file                      | Scan | Method    | Score | m/z    | Gene names |
|-------------------------------|------|-----------|-------|--------|------------|
| 20140602_QEp4_FaHo_SA_RCO1_03 | 3799 | FTMS; HCD | 73.23 | 470.29 | TRX2;TRX1  |

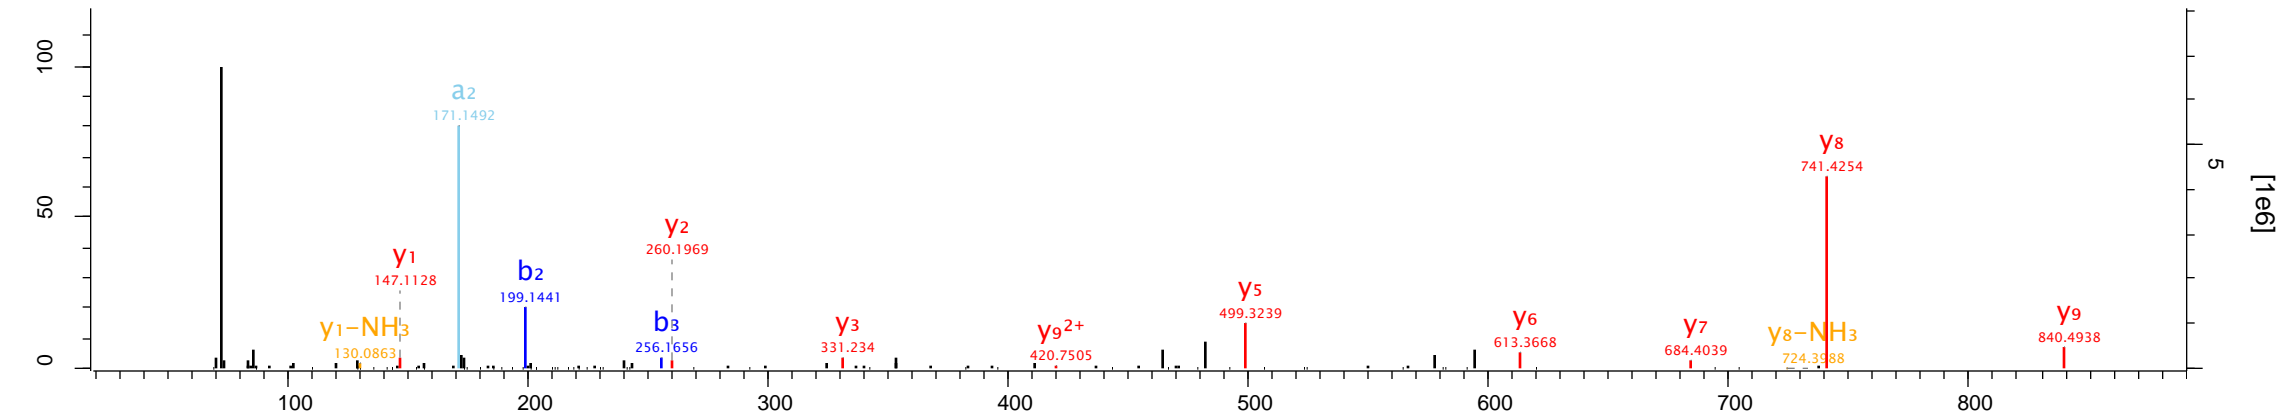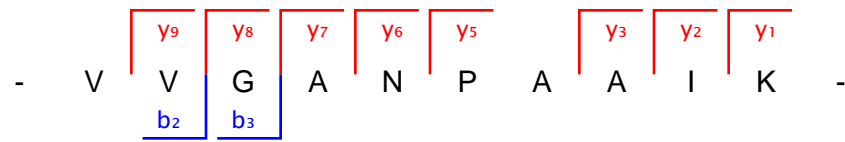

20140602\_QEp4\_FaHo\_SA\_380 FTMS; 107.9 589.2 TY1B-ML1;TY1B-BR;TY1B-H;TY1B-MR2;TY1B-OR;TY1B-DR1;TY1B-NL2;TY1B-PR2;TY1B-DR5;TY1B-PR1;TY1B-JR2;TY1B-NL1;TY1B-OL;TY1B-LR4;TY1B-ML2;TY1B-DR3

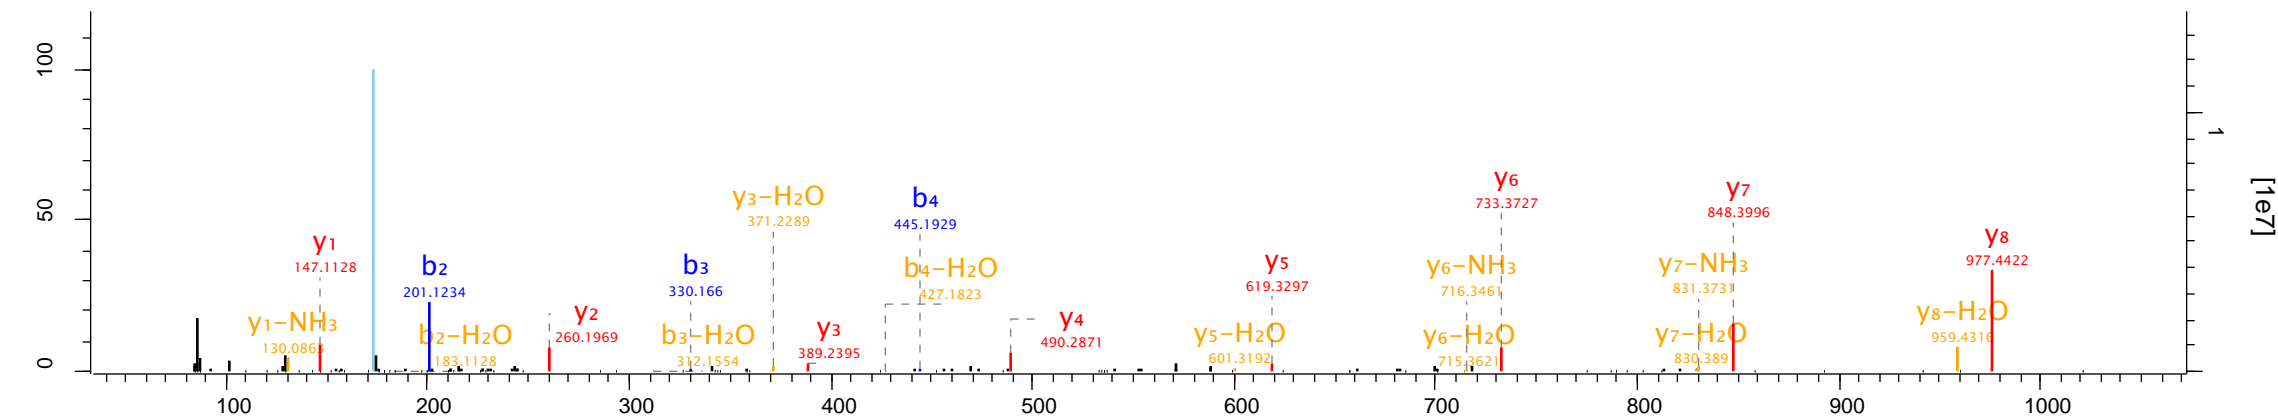

- S L E D N E T E I K -

b<sub>2</sub> b<sub>3</sub> b<sub>4</sub>

y<sub>8</sub> y<sub>7</sub> y<sub>6</sub> y<sub>5</sub> y<sub>4</sub> y<sub>3</sub> y<sub>2</sub> y<sub>1</sub>

| Raw file                      | Scan | Method    | Score  | m/z    | Gene names    |
|-------------------------------|------|-----------|--------|--------|---------------|
| 20140602_QEp4_FaHo_SA_RCO1_03 | 4101 | FTMS; HCD | 122.79 | 371.23 | RPL14B;RPL14A |

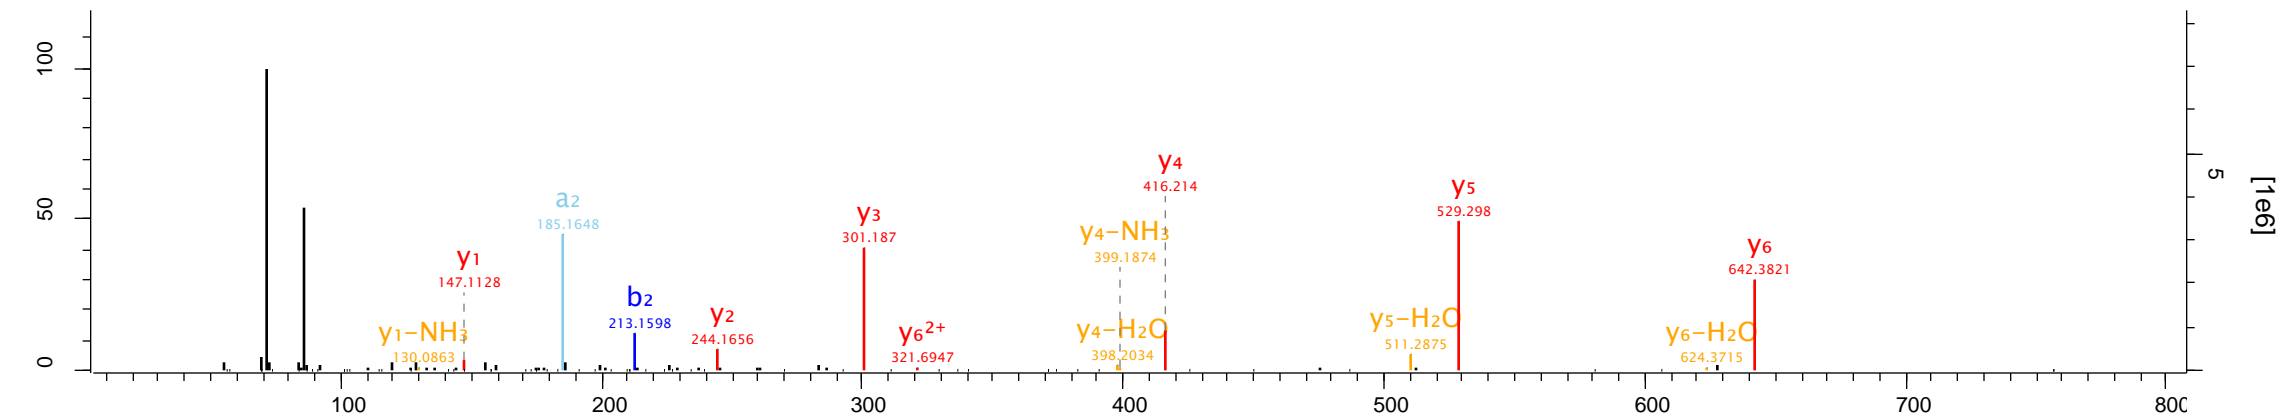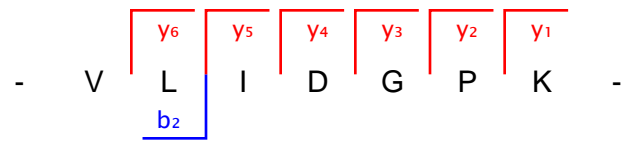

Raw file

Scan Method Score m/z Gene names

20140602\_QEp4\_FaHo\_SA\_RCO1\_03

4645 FTMS; HCD 83.76 544.29 TY1B-ML1;TY1B-BR;TY1B-H;TY1B-MR2;TY1B-OR;TY1B-NL2;TY1B-PR2;TY1B-DR5;TY1B-PR1;TY1B-JR2;TY1B-DR3

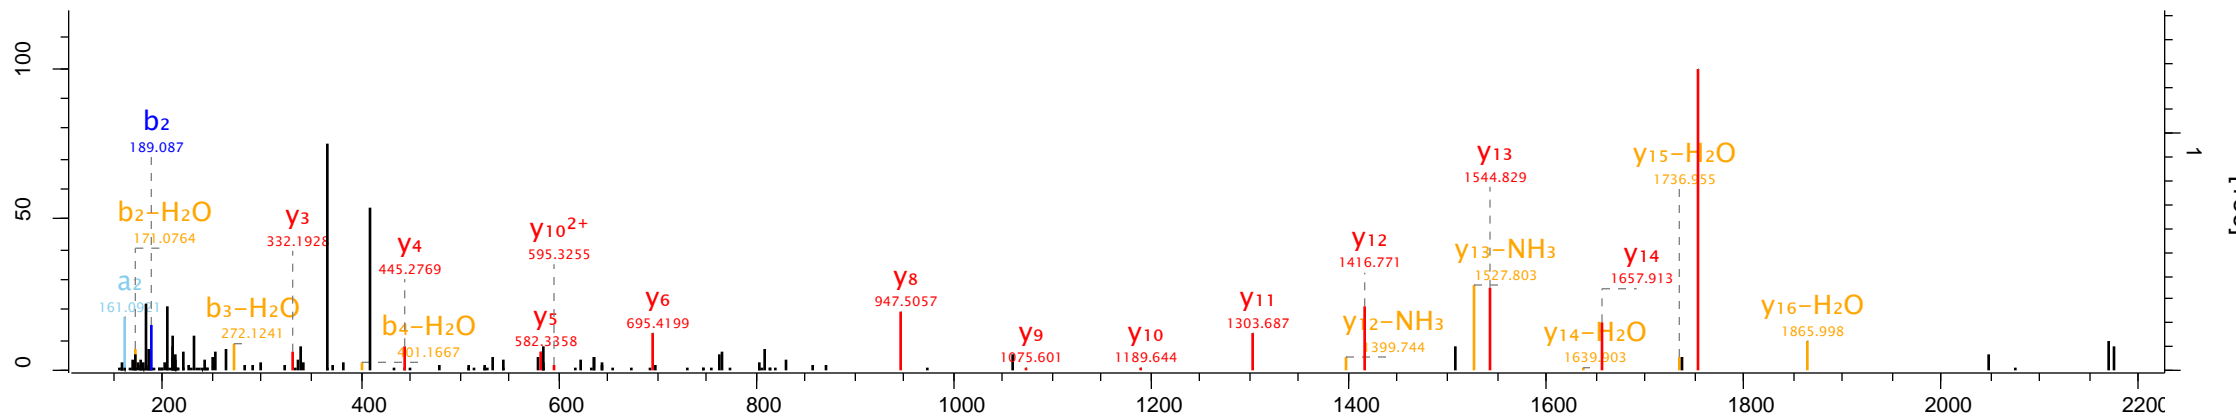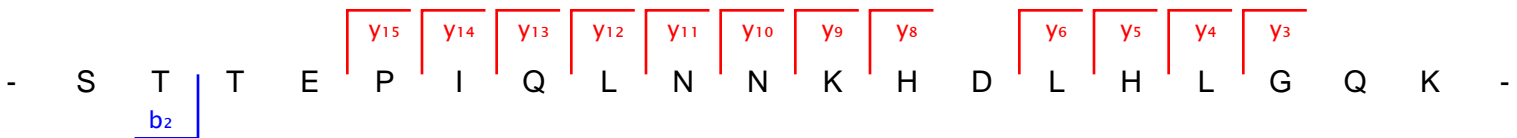

| Raw file                      | Scan | Method    | Score  | m/z   | Gene names  |
|-------------------------------|------|-----------|--------|-------|-------------|
| 20140602_QEp4_FaHo_SA_RCO1_03 | 4931 | FTMS; HCD | 121.64 | 514.8 | RPL7A;RPL7B |

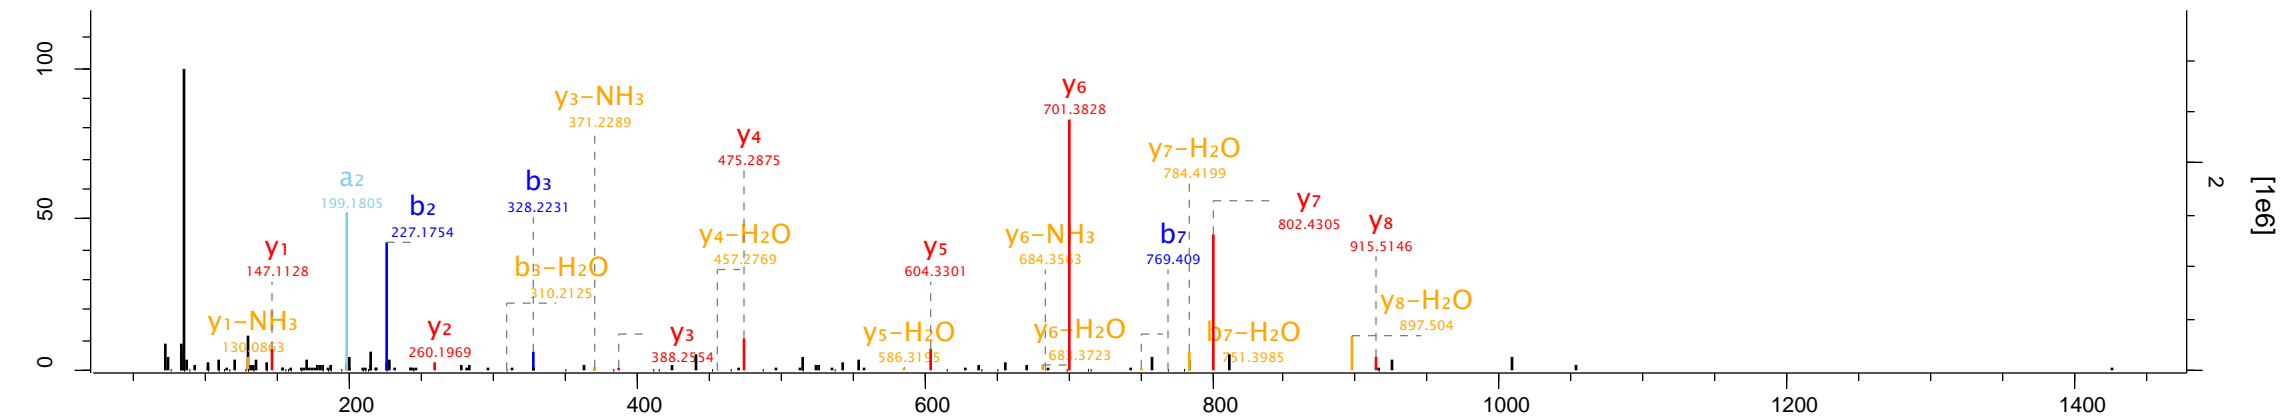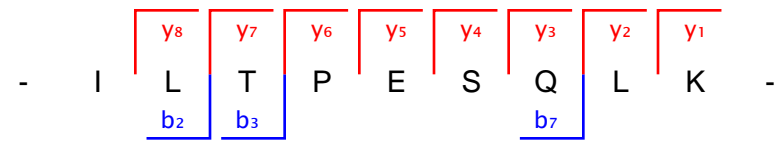

Raw file Scan Method Score m/z Gene names

20140602\_QEp4\_FaHo\_SA\_R15100\_FTMS; 107.5 381.2 TY1B-DR1;TY1B-NL2;TY1B-PR1;TY2B-C;TY1B-OL;TY1B-LR4;TY1B-ML2;TY1B-DR3;TY1B-PL;TY1B-LR2;TY1B-DR6;TY1B-A;TY2B-B;TY2B-GR2;TY2B-F;TY2B-GR1;TY

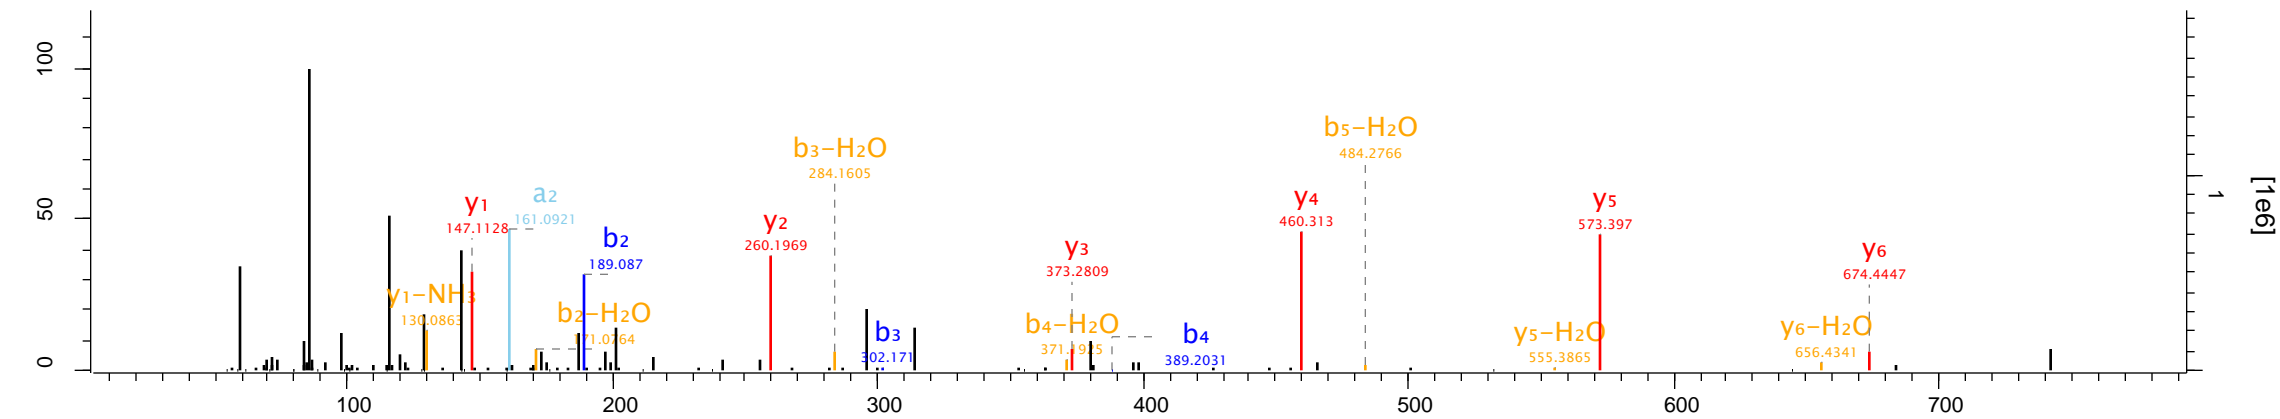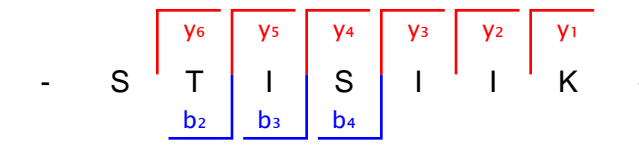



20140602\_QEp4\_FaHo\_SA\_RSC2\_0 1715 FTMS; HCD 79.66 394.85 TY1A-PR1;TY1A-A;TY1A-DR4;TY1B-PR1;TY1B-JR2;TY1A-PL;TY1A-LR2;TY1A-ER1;TY1A-DR6;TY1B-OL;TY1B-LR4;TY1B-ML2;TY1B-PR3;TY1B-PL;TY1B-L

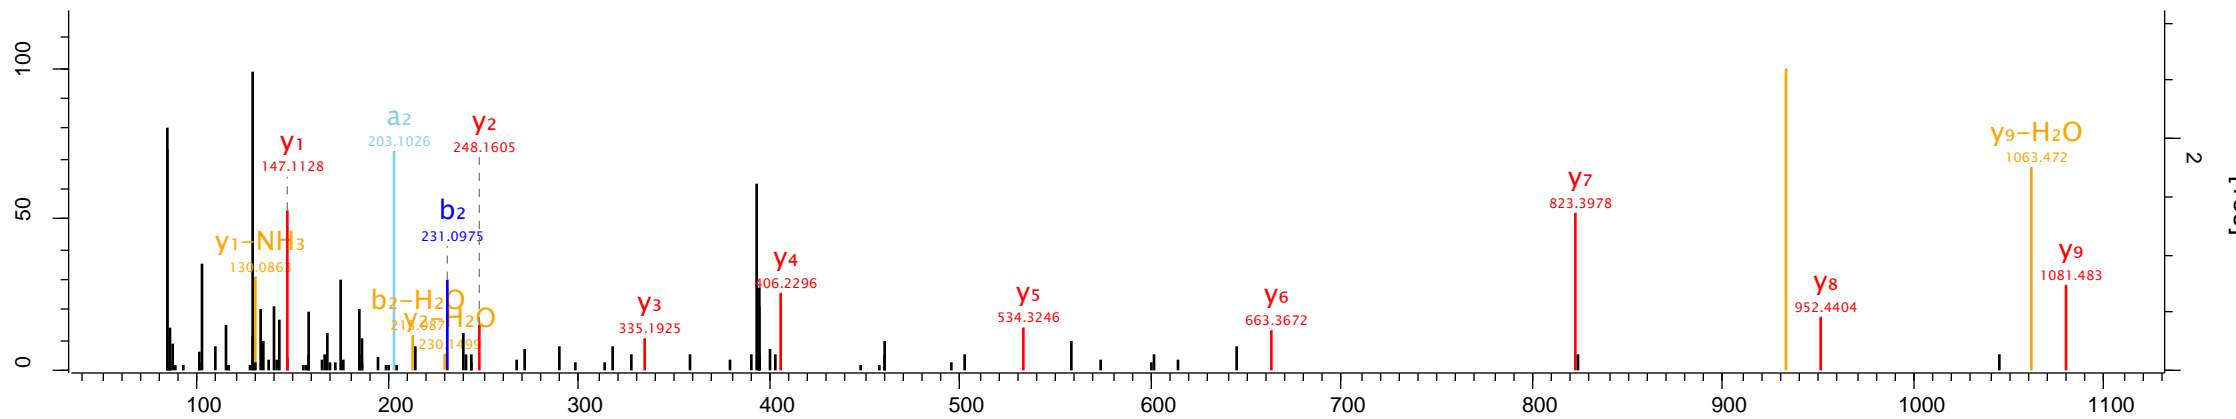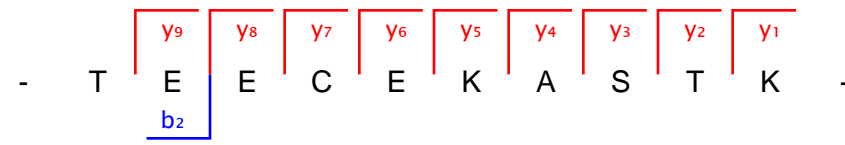

| Raw file                      | Scan | Method    | Score | m/z    | Gene names  |
|-------------------------------|------|-----------|-------|--------|-------------|
| 20140602_QEp4_FaHo_SA_RSC2_01 | 2857 | FTMS; HCD | 73.33 | 465.79 | RPL4B;RPL4A |

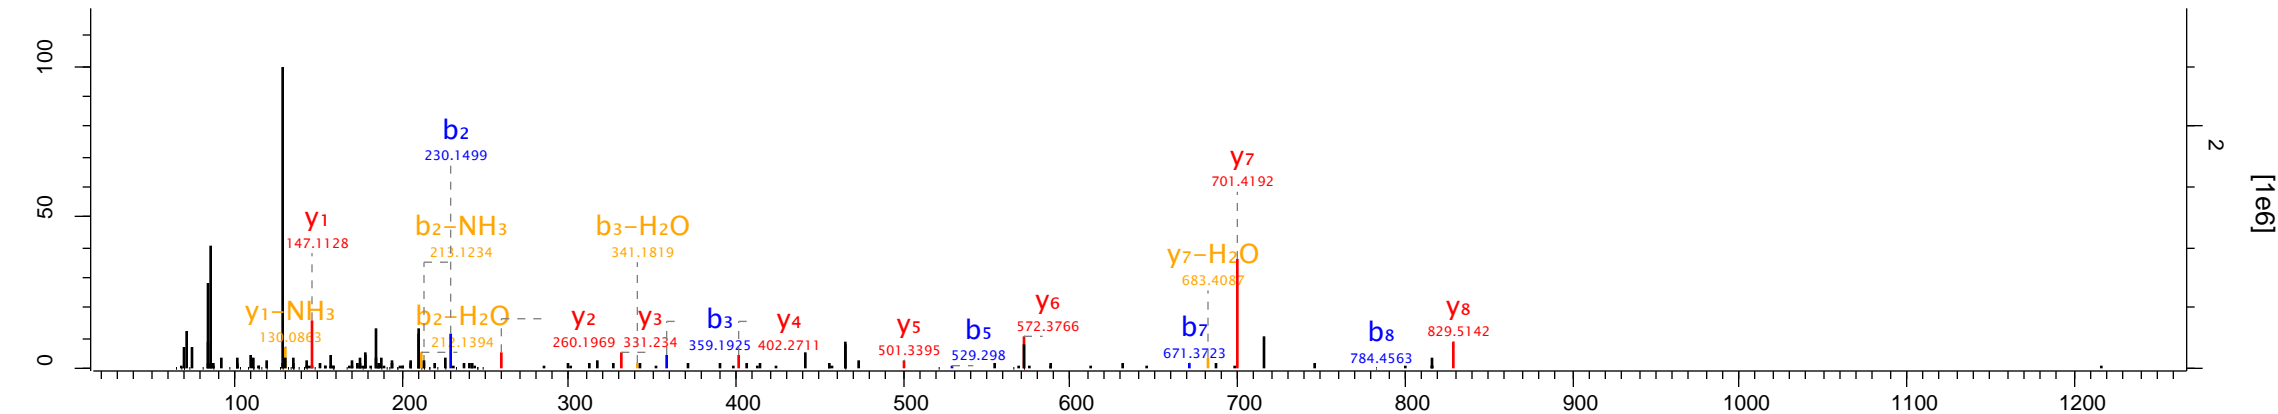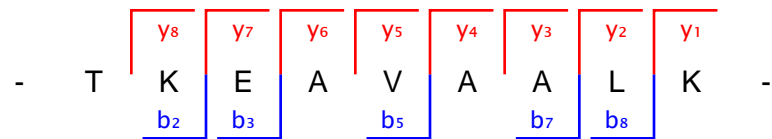

| Raw file                      | Scan | Method    | Score  | m/z    | Gene names |
|-------------------------------|------|-----------|--------|--------|------------|
| 20140602_QEp4_FaHo_SA_RSC2_02 | 4397 | FTMS; HCD | 136.93 | 502.62 | HXT6;HXT7  |

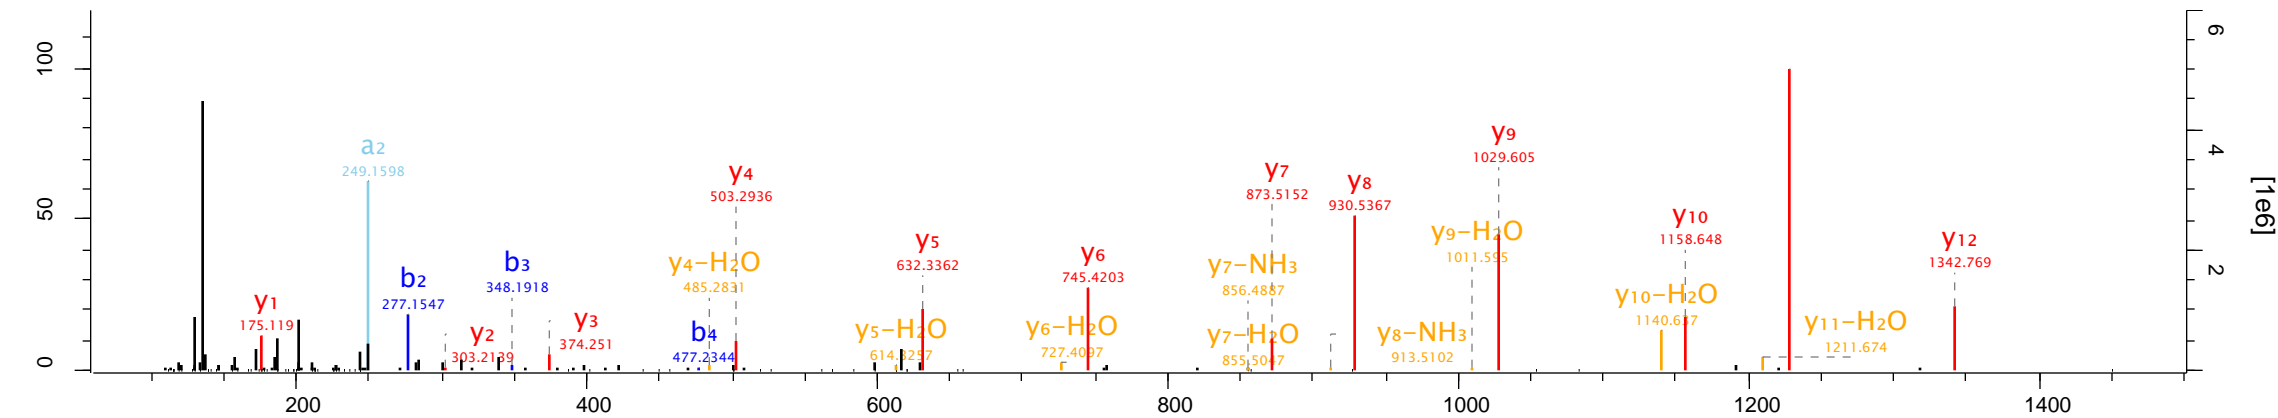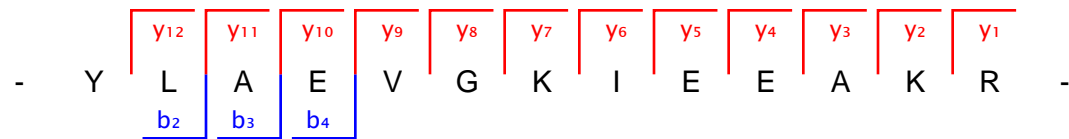

Raw file Scan Method Score m/z Gene names

20140602\_QEp4\_FaHo\_SA\_RSC2\_02 6702 FTMS; HCD 102.87 465.28 YOR1

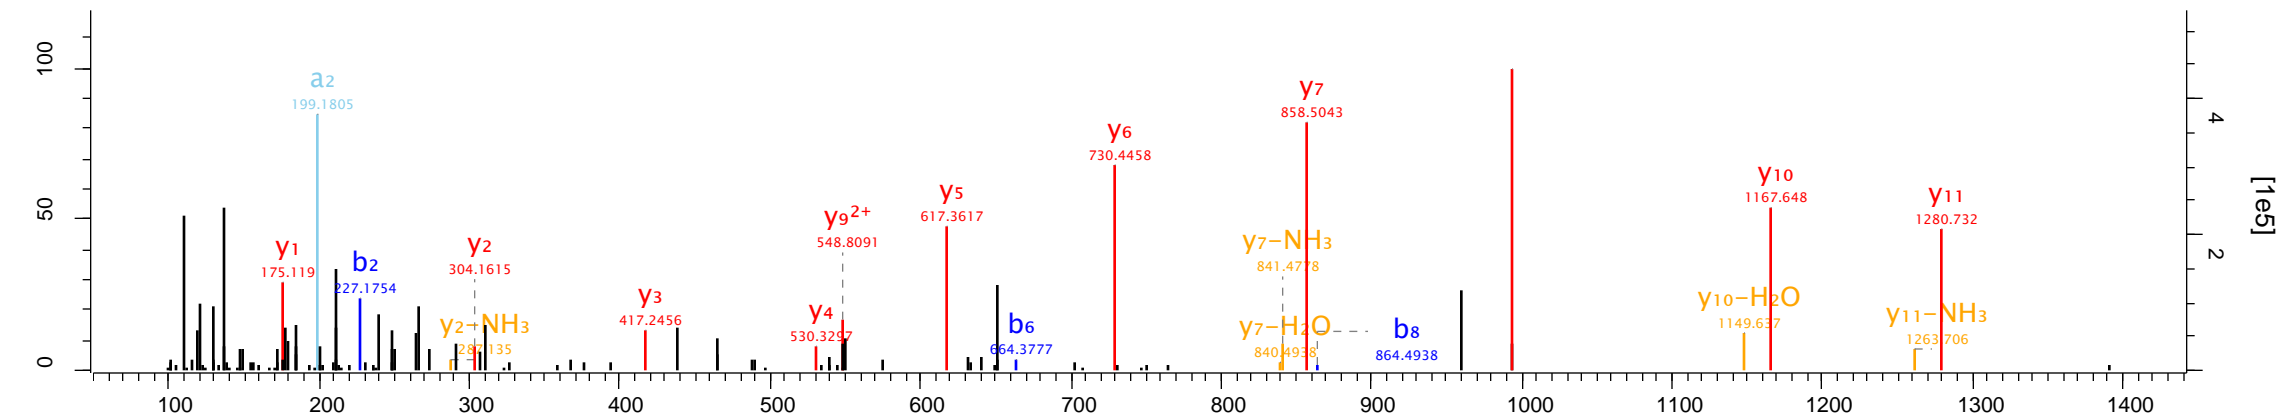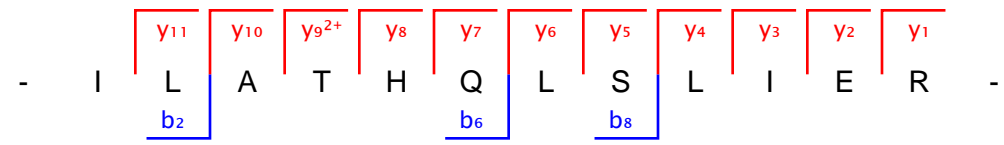

| Raw file                      | Scan | Method    | Score | m/z    | Gene names  |
|-------------------------------|------|-----------|-------|--------|-------------|
| 20140602_QEp4_FaHo_SA_RSC2_02 | 6784 | FTMS; HCD | 101.2 | 544.31 | RPL4B;RPL4A |

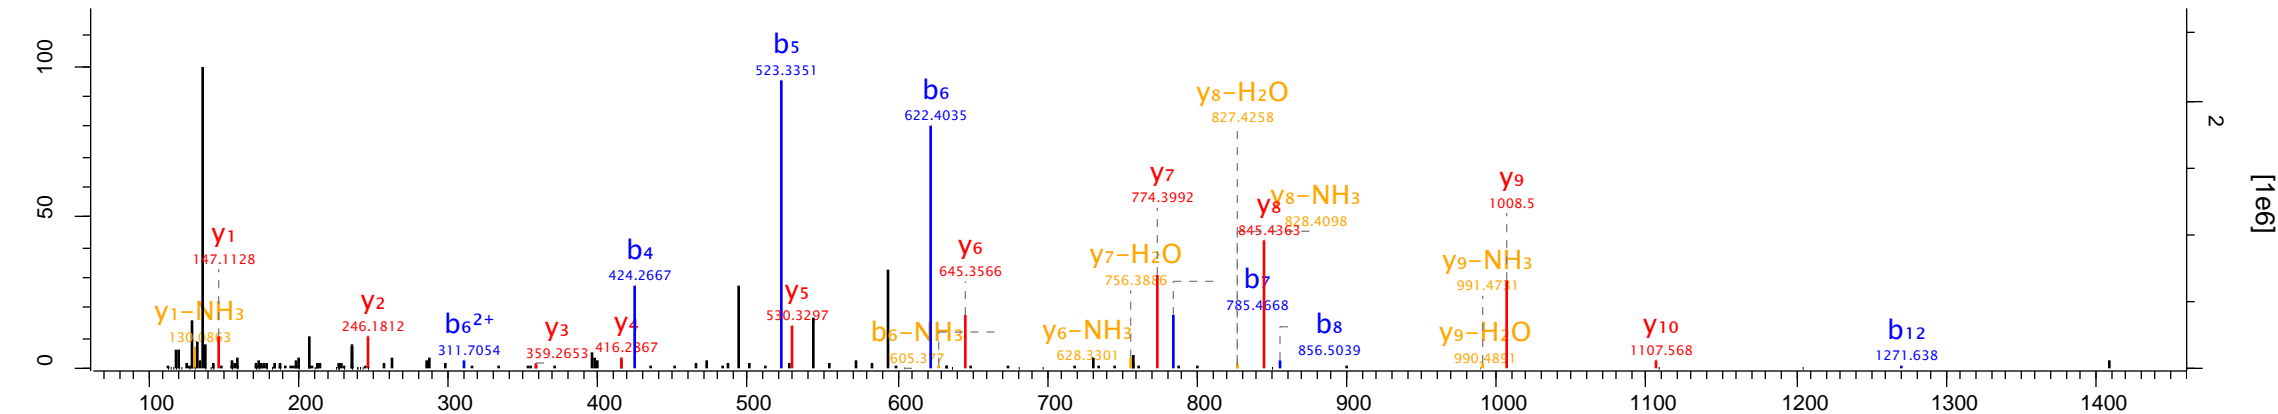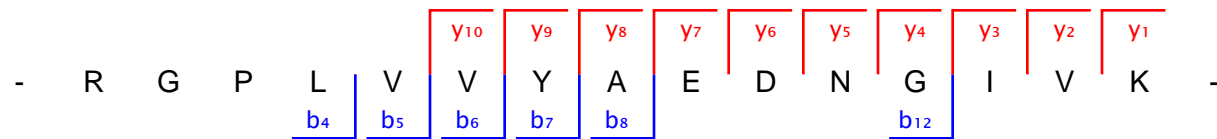

| Raw file                      | Scan | Method    | Score | m/z    | Gene names |
|-------------------------------|------|-----------|-------|--------|------------|
| 20140602_QEp4_FaHo_SA_RSC2_02 | 8436 | FTMS; HCD | 91.93 | 602.34 | SAT4       |

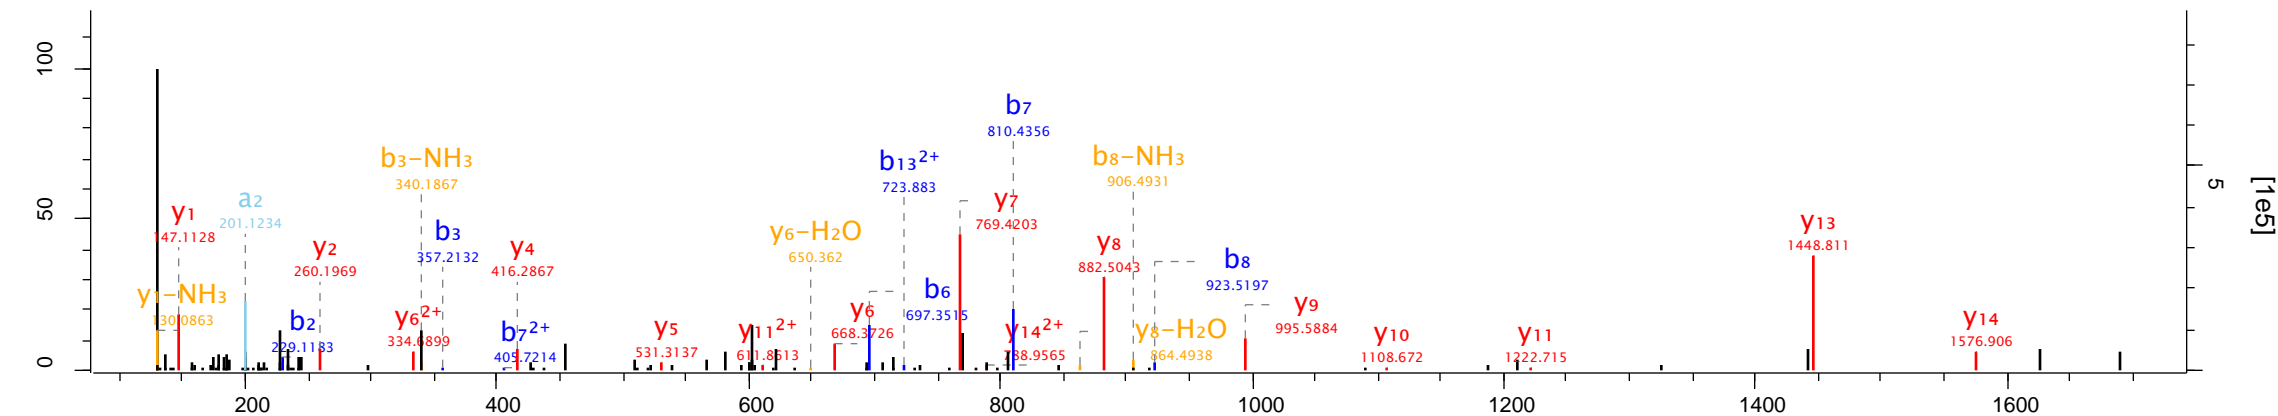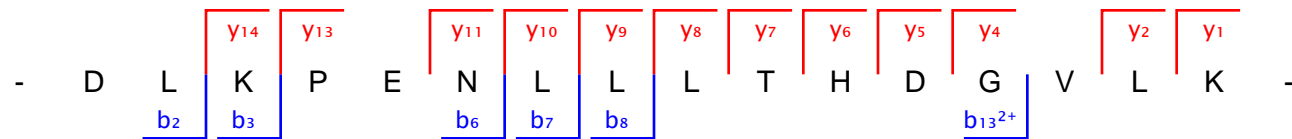

| Raw file                      | Scan | Method    | Score | m/z   | Gene names |
|-------------------------------|------|-----------|-------|-------|------------|
| 20140602_QEp4_FaHo_SA_RSC2_03 | 3050 | FTMS; HCD | 88.92 | 348.5 | RPL31A     |

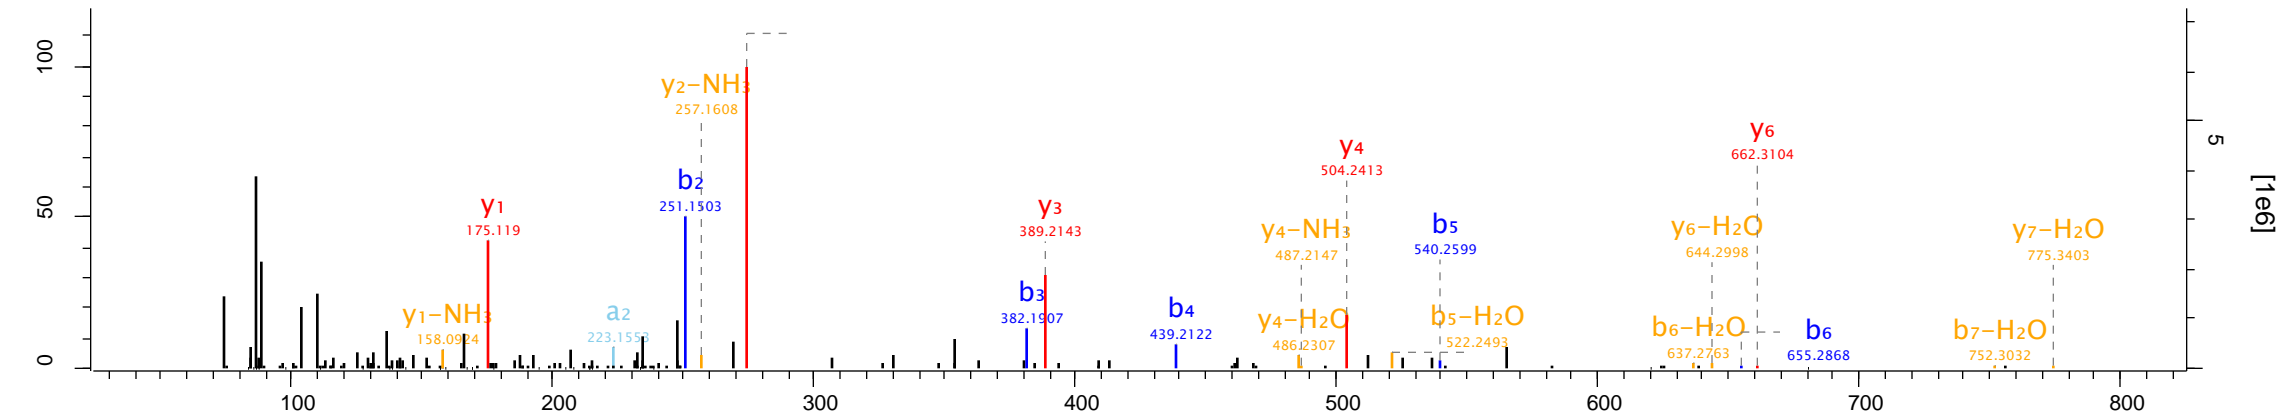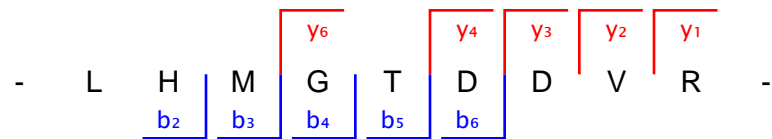

| Raw file                      | Scan | Method    | Score | m/z    | Gene names |
|-------------------------------|------|-----------|-------|--------|------------|
| 20140602_QEp4_FaHo_SA_RSC2_03 | 4541 | FTMS; HCD | 0.45  | 604.92 | YME2       |

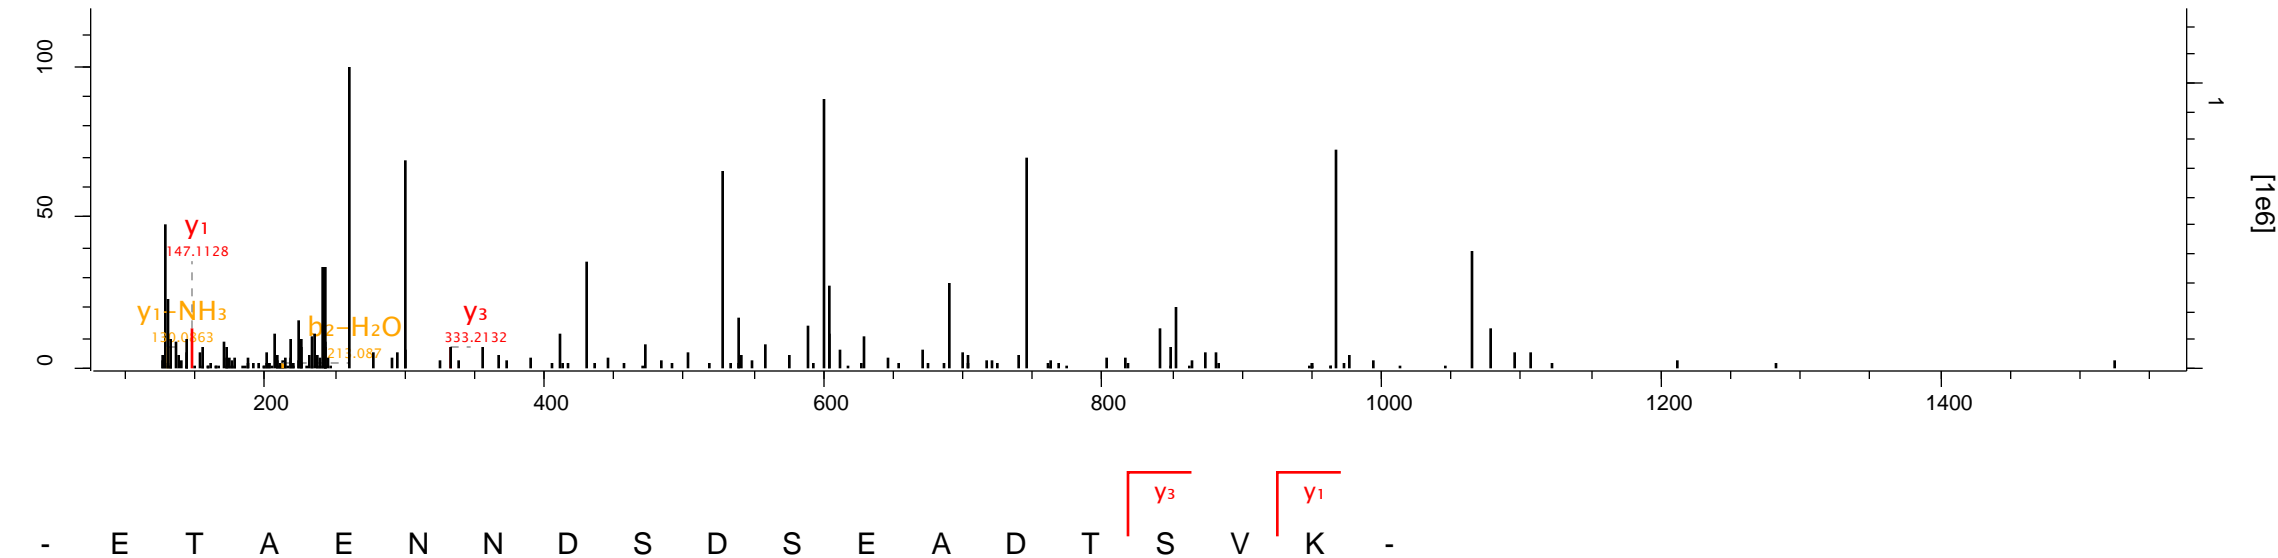



| Raw file                      | Scan | Method    | Score | m/z    | Gene names |
|-------------------------------|------|-----------|-------|--------|------------|
| 20140602_QEp4_FaHo_SA_RSC2_03 | 6503 | FTMS; HCD | 90.39 | 649.97 | ATO3       |

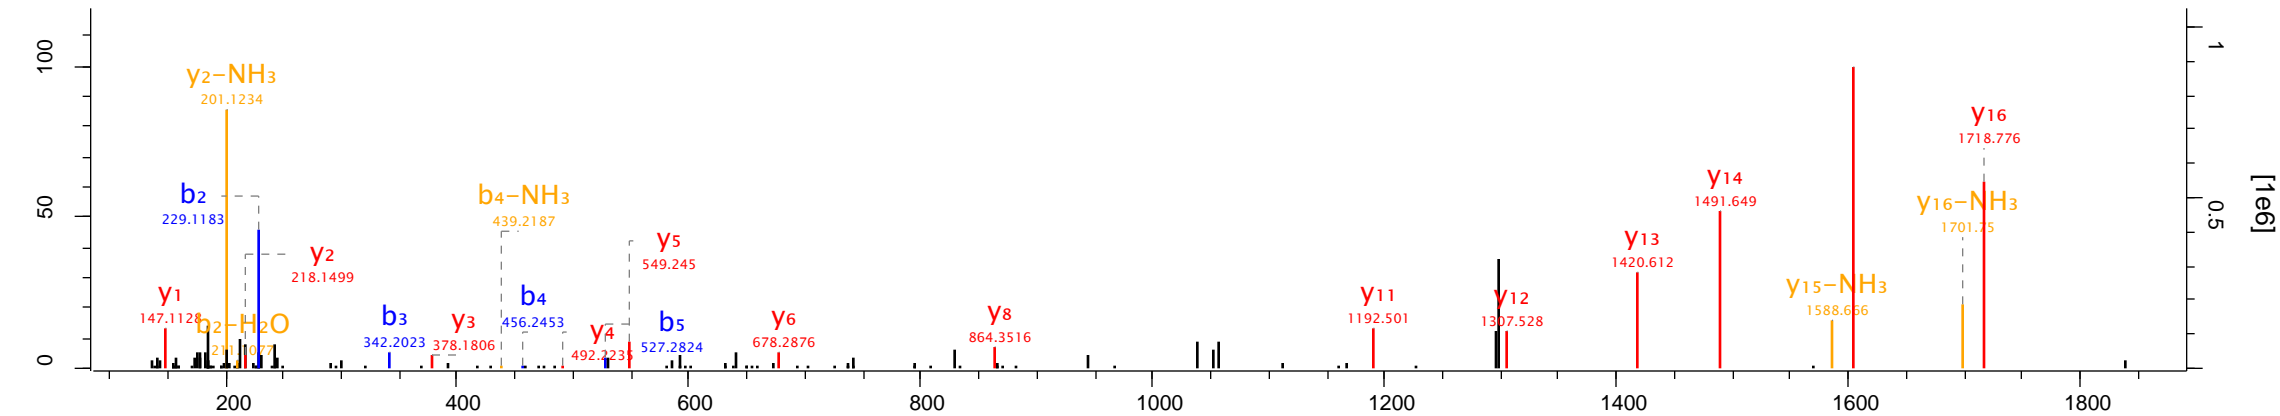

- D L L N A L D R G D G E E G N C A K -

b<sub>2</sub>
b<sub>3</sub>
b<sub>4</sub>
b<sub>5</sub>
y<sub>16</sub>
y<sub>15</sub>
y<sub>14</sub>
y<sub>13</sub>
y<sub>12</sub>
y<sub>11</sub>
y<sub>8</sub>
y<sub>6</sub>
y<sub>5</sub>
y<sub>4</sub>
y<sub>3</sub>
y<sub>2</sub>
y<sub>1</sub>

Raw file Scan Method Score m/z Gene names

20140602\_QEp4\_FaHo\_SA\_RSC2\_C 8010 FTMS; 136.57 906.44 TY2B-C;TY2B-GR2;TY2B-F;TY2B-GR1;TY2A-GR1;TY2B-OR1;TY2A-DR2;TY2B-DR1;TY2B-DR3;TY2B-LR1;TY2B-OR2;TY2A-OR1;TY2A-LR2;TY2A-OR2;TY2

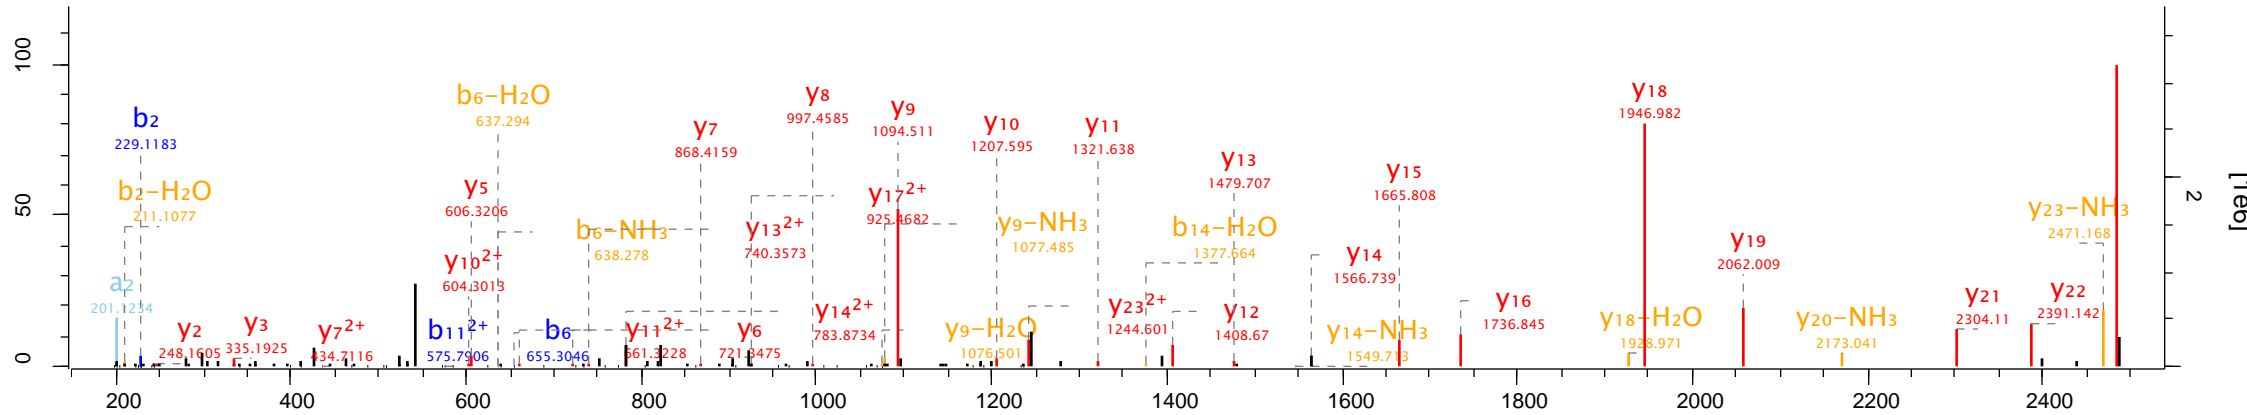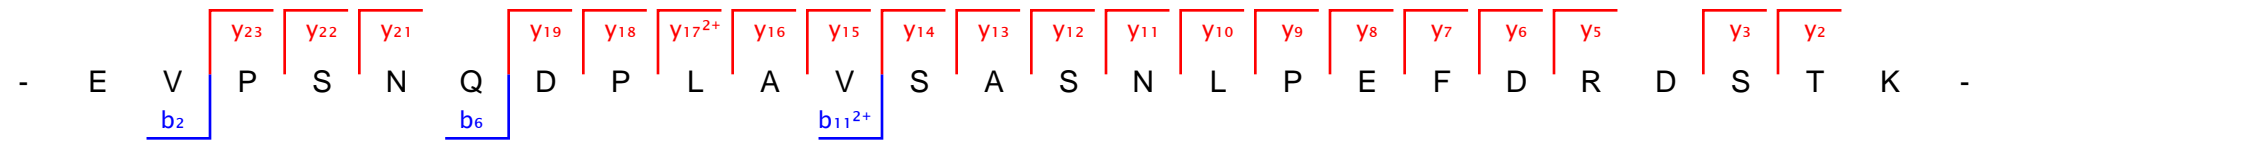

Raw file Scan Method Score m/z Gene names

20140602\_QEp4\_FaHo\_SA\_RSC2\_03 9025 FTMS; HCD 115.68 581.33 FRE1

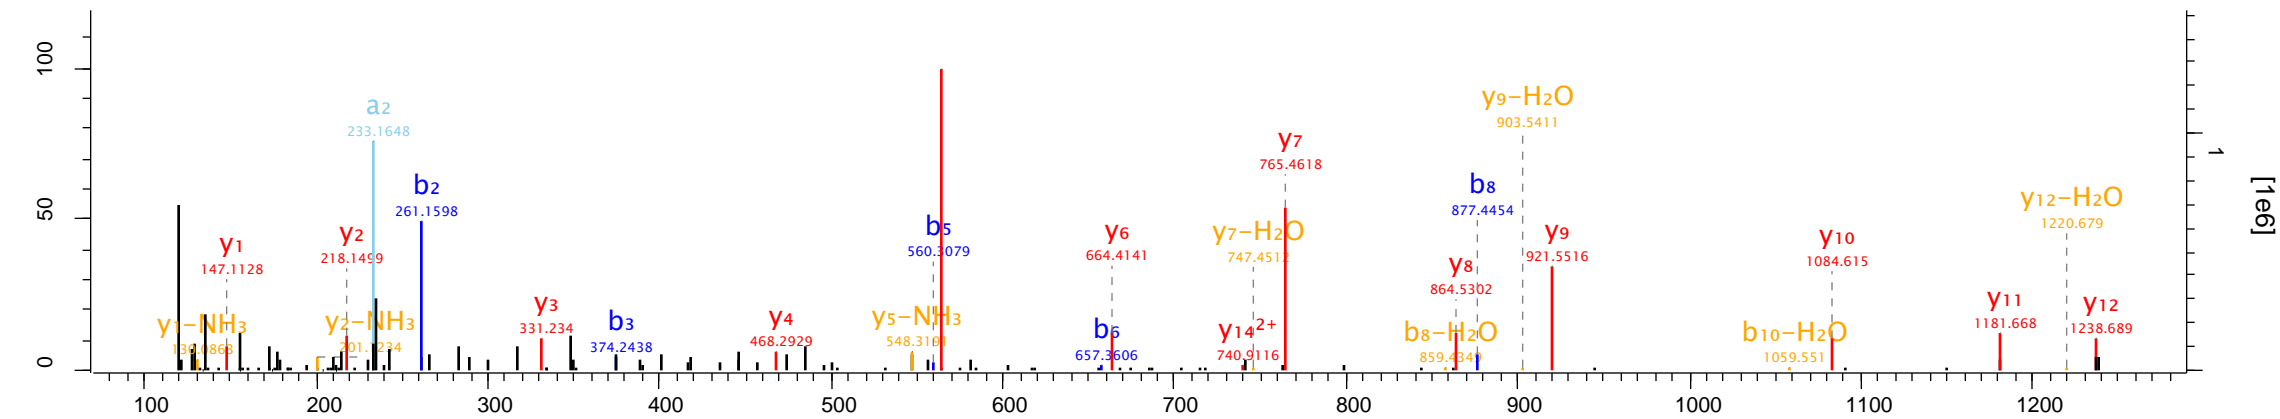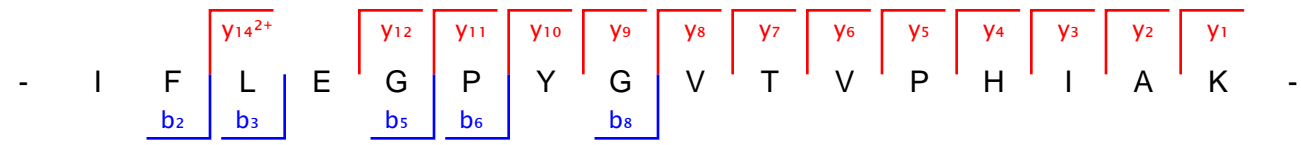

Raw file

Scan Method Score m/z Gene names

20140602\_QEp4\_FaHo\_SA\_RSC2\_0 9414 FTMS; HCC 150.39 666.33 TY1B-ML1;TY1B-BR;TY1B-H;TY1B-MR2;TY1B-OR;TY1B-NL2;TY1B-PR2;TY1B-DR5;TY1B-PR1;TY1B-JR2;TY1B-NL1;TY1B-OL;TY1B-ML2;TY1B-PR3;TY1B-

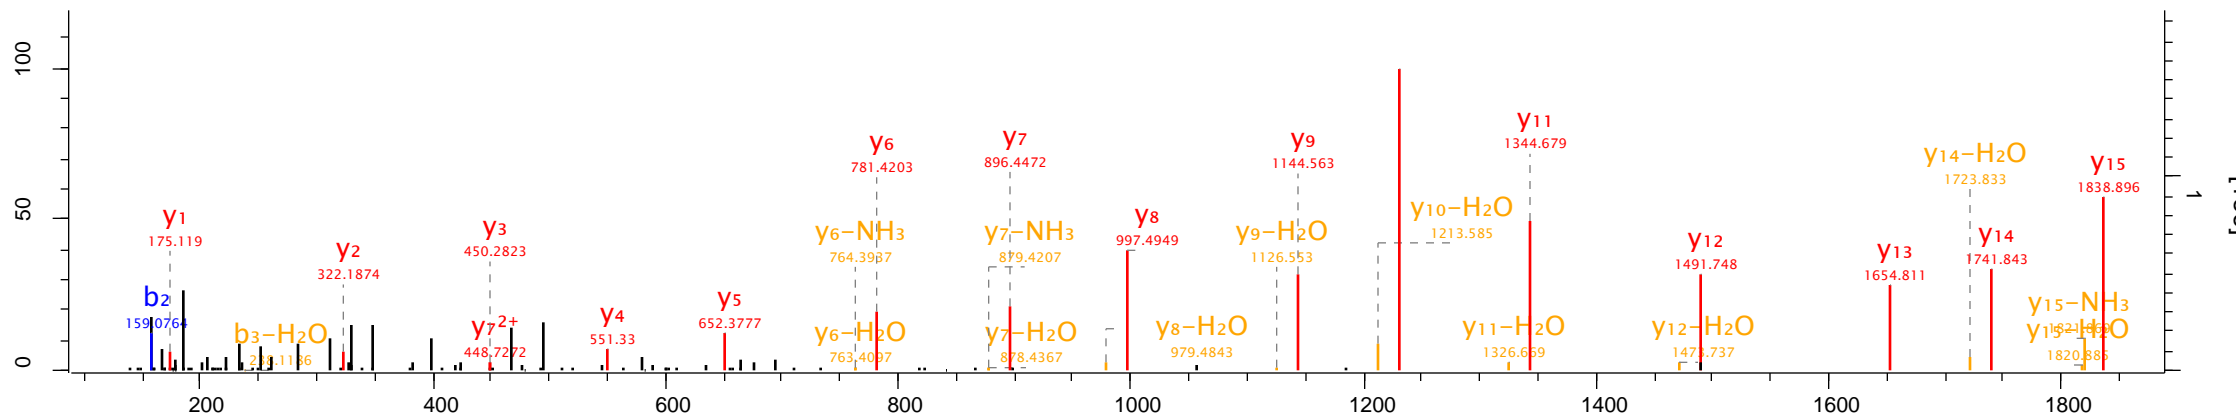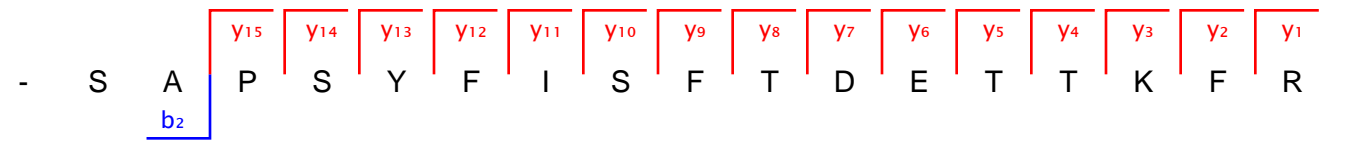

| Raw file                      | Scan | Method    | Score  | m/z   | Gene names  |
|-------------------------------|------|-----------|--------|-------|-------------|
| 20140602_QEp4_FaHo_SA_RSC4_01 | 2251 | FTMS; HCD | 107.59 | 449.2 | RPL7A;RPL7B |

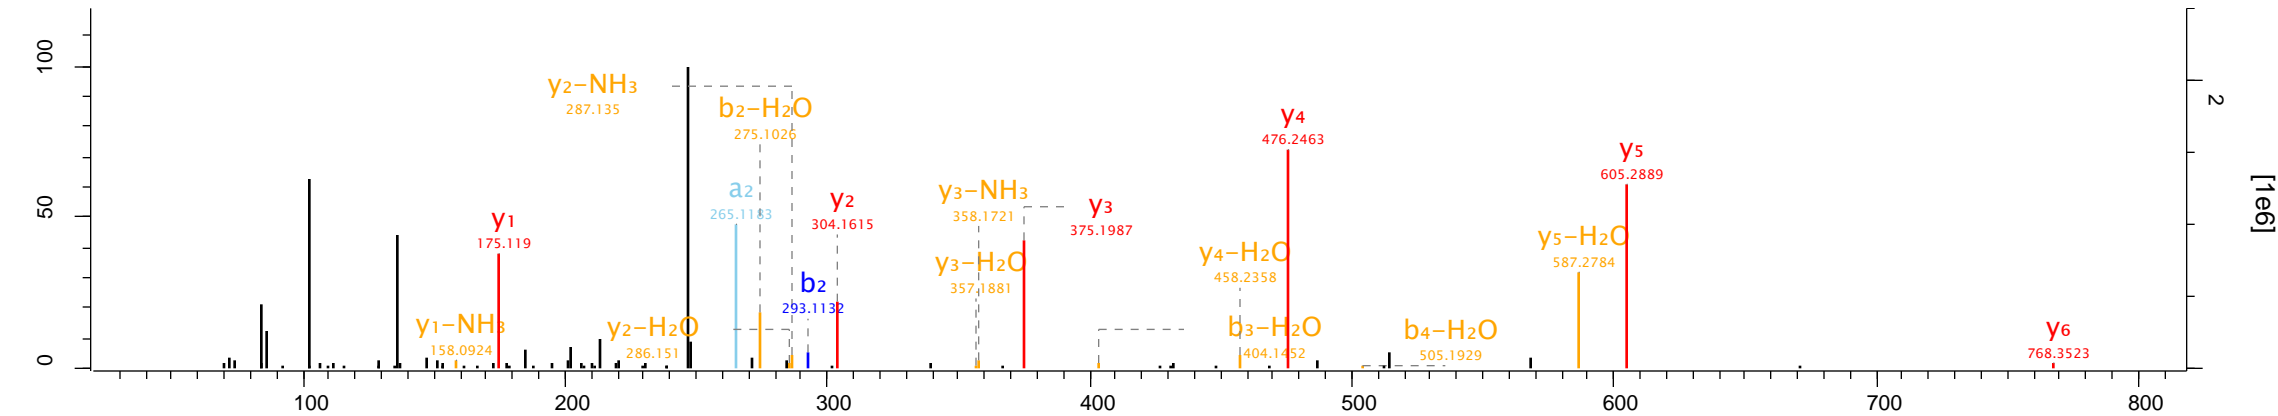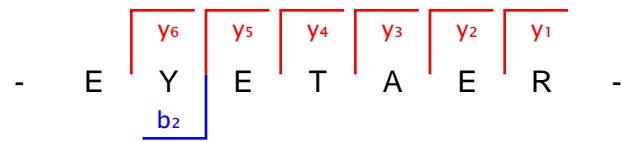

| Raw file                      | Scan | Method    | Score  | m/z    | Gene names  |
|-------------------------------|------|-----------|--------|--------|-------------|
| 20140602_QEp4_FaHo_SA_RSC4_01 | 3289 | FTMS; HCD | 136.52 | 505.79 | RPL4B;RPL4A |

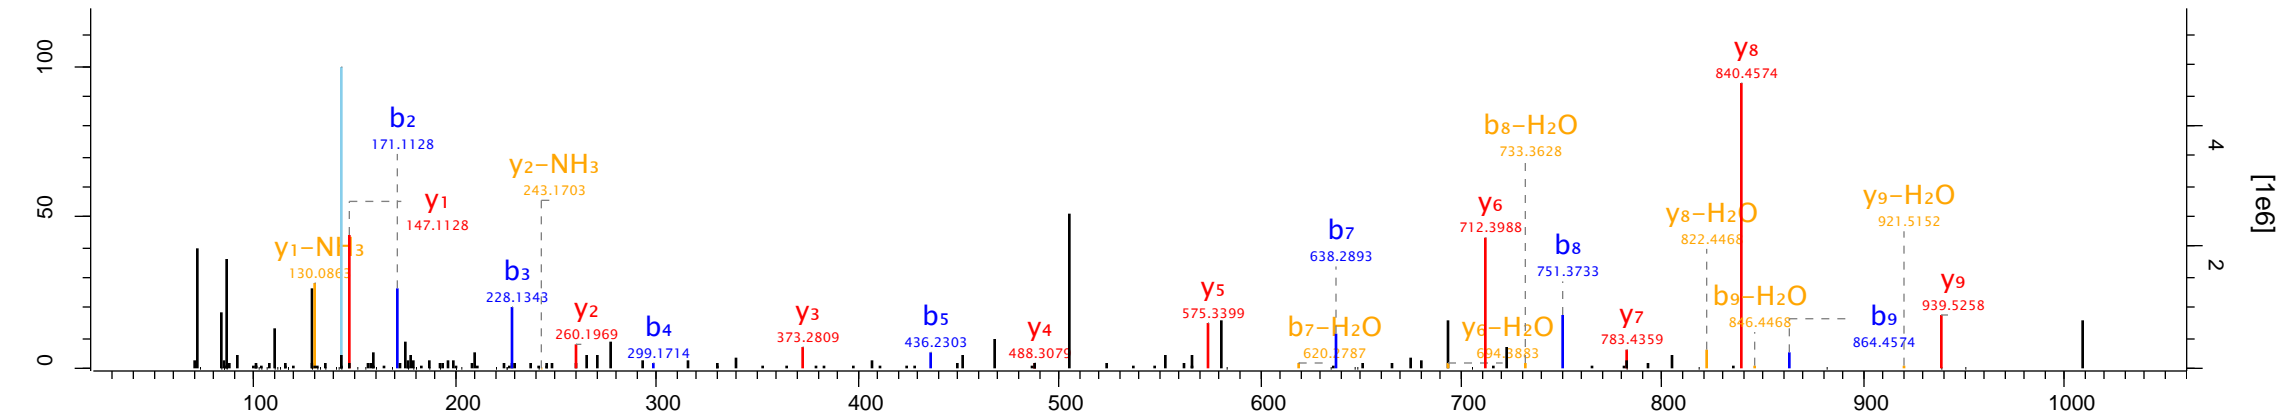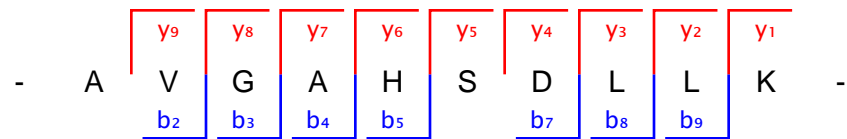

| Raw file                      | Scan | Method    | Score  | m/z    | Gene names    |
|-------------------------------|------|-----------|--------|--------|---------------|
| 20140602_QEp4_FaHo_SA_RSC4_01 | 3708 | FTMS; HCD | 134.05 | 491.28 | RPL13B;RPL13A |

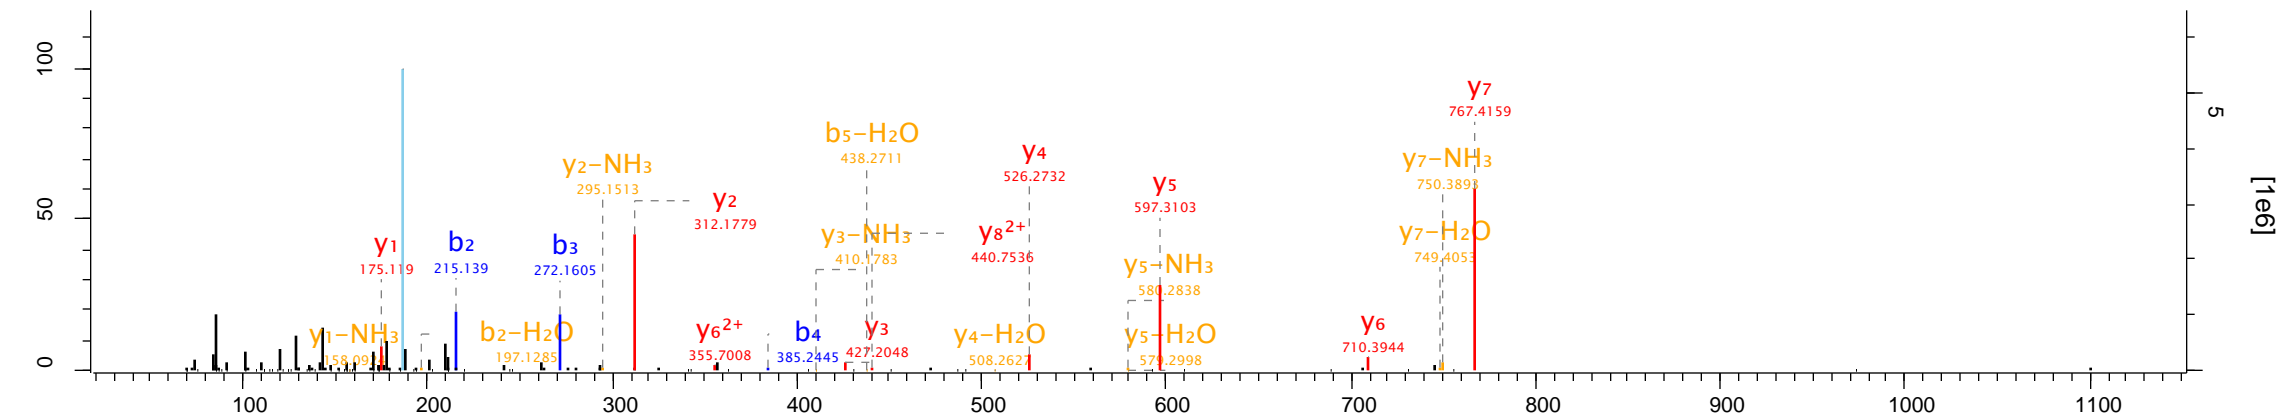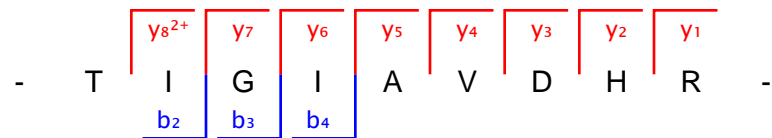

20140602\_QEp4\_FaHo\_4Q(F)FTMS(1)160:622:1 TY1B-ML1;TY1B-BR;TY1A-PR1;TY1A-A;TY1A-DR4;TY1B-H;TY1B-MR2;TY1B-OR;TY1B-DR1;TY1B-NL2;TY1B-PR2;TY1B-DR5;TY1B-PR1;TY1B-JR2;TY1A-PL;TY1A-LR2;TY1A-B

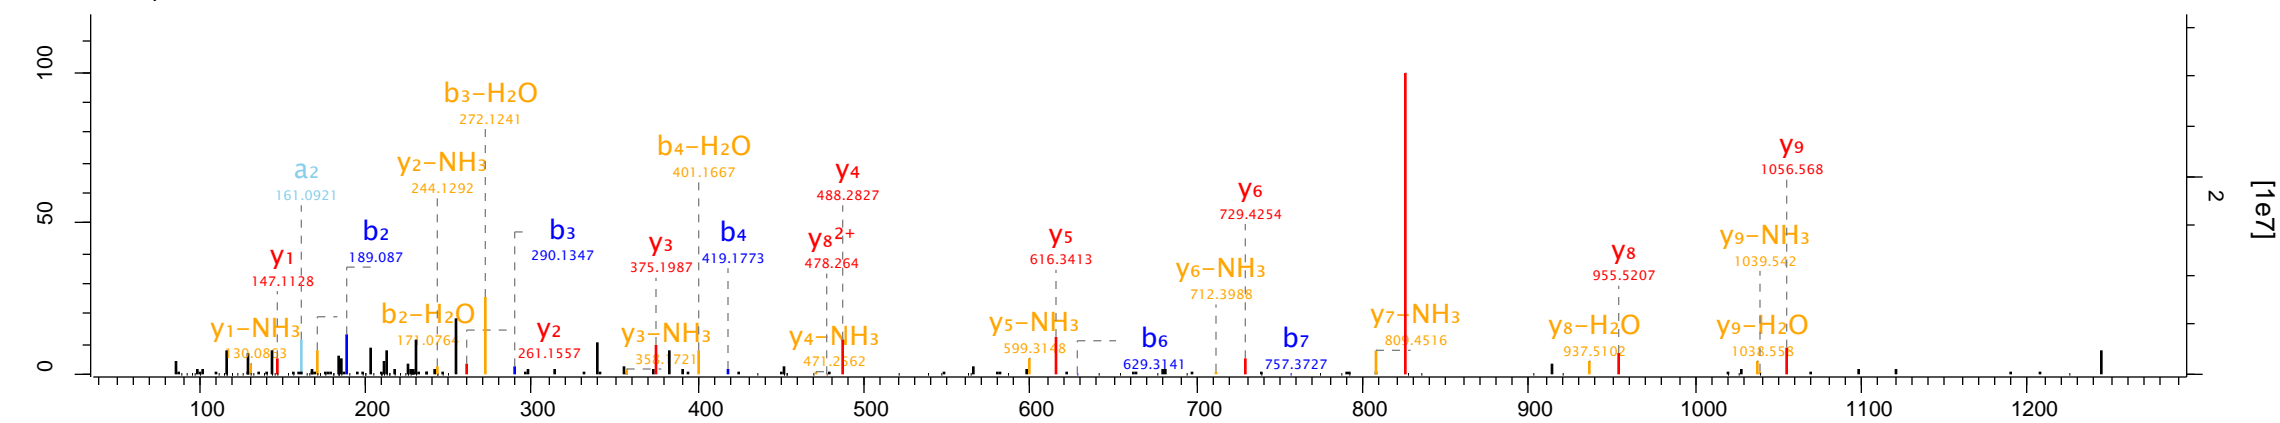

- S T T E P I Q L N N K -

b<sub>2</sub> b<sub>3</sub> b<sub>4</sub> b<sub>6</sub> b<sub>7</sub>

[1e7]



Raw file

Scan

Method

Score

m/z

Gene names

20140602\_QEp4\_FaHo\_SA\_RSC4\_01

5057

FTMS; HCD

189.51

803.71

TY1A-DR2;TY1B-BL;TY1B-MR1;TY1A-MR1

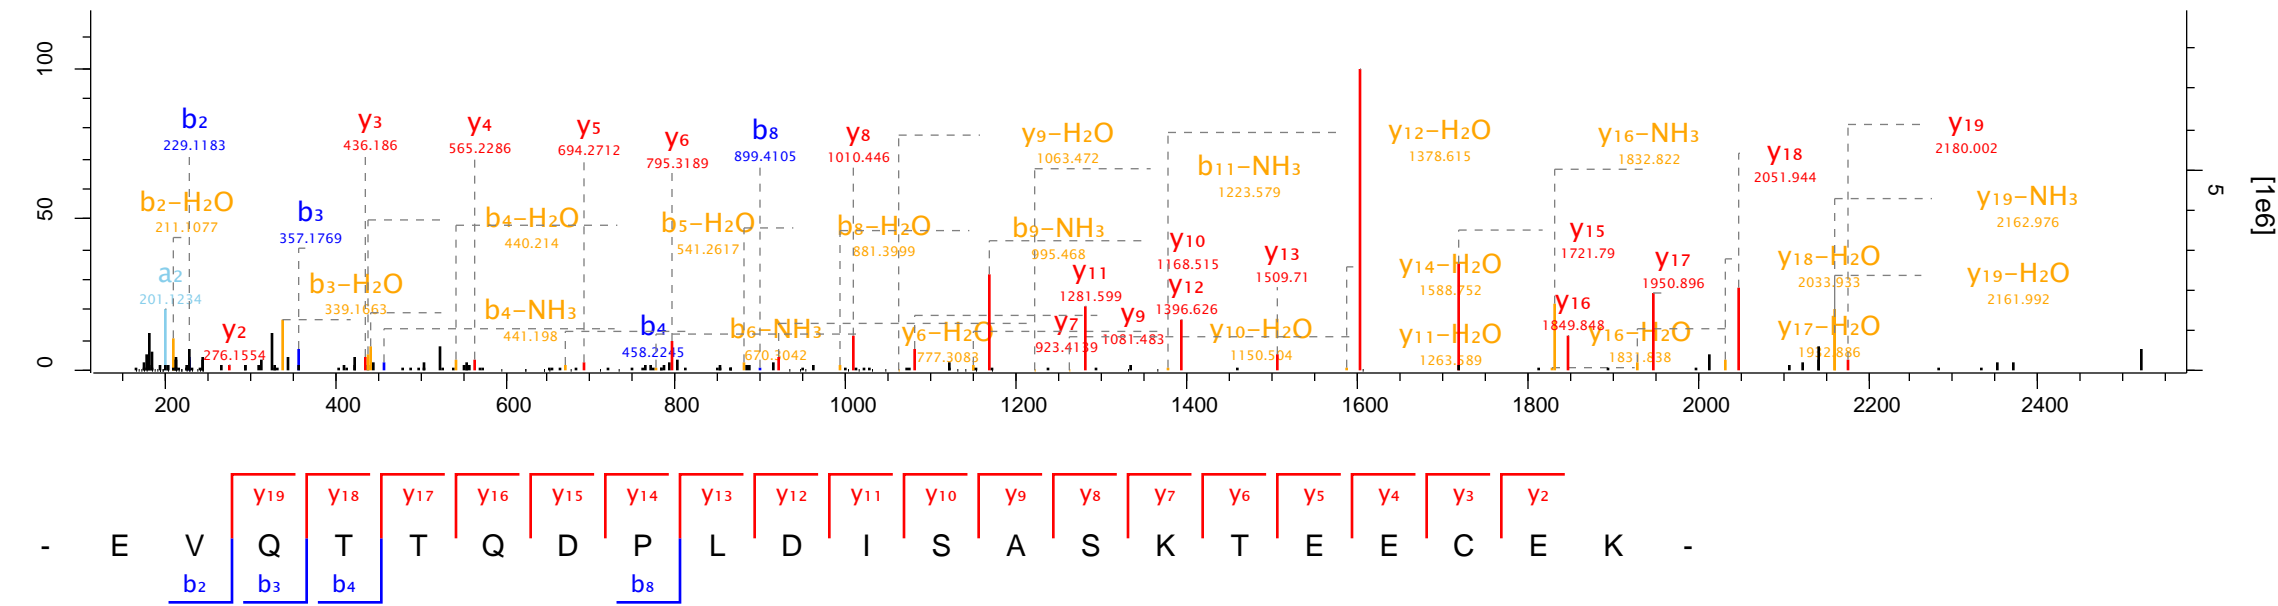

Raw file

Scan

Method

Score

m/z

Gene names

20140602\_QEp4\_FaHo\_SA\_RSC4\_01

5705

FTMS; HCD

160.81

816.91

TY1A-DR2;TY1B-BL;TY1B-MR1;TY1A-MR1

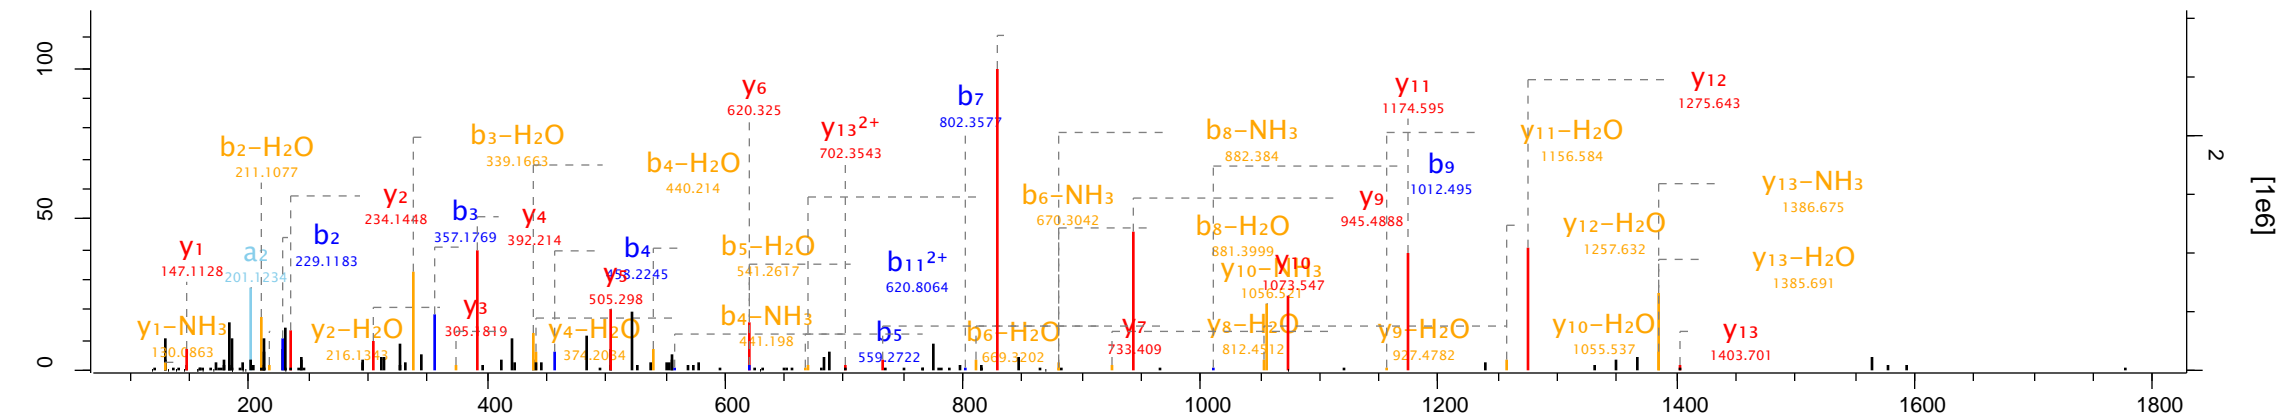

-

E

V

y13

Q

y12

T

y11

T

y10

Q

y9

D

y8

P

y7

L

y6

D

y5

I

y4

S

y3

A

y2

S

y1

K

-

b2

b3

b4

b5

b7

b9

b11<sup>2+</sup>2  
[1e6]

| Raw file                      | Scan | Method    | Score  | m/z    | Gene names |
|-------------------------------|------|-----------|--------|--------|------------|
| 20140602_QEp4_FaHo_SA_RSC4_01 | 8772 | FTMS; HCD | 109.14 | 808.94 | ILV1       |

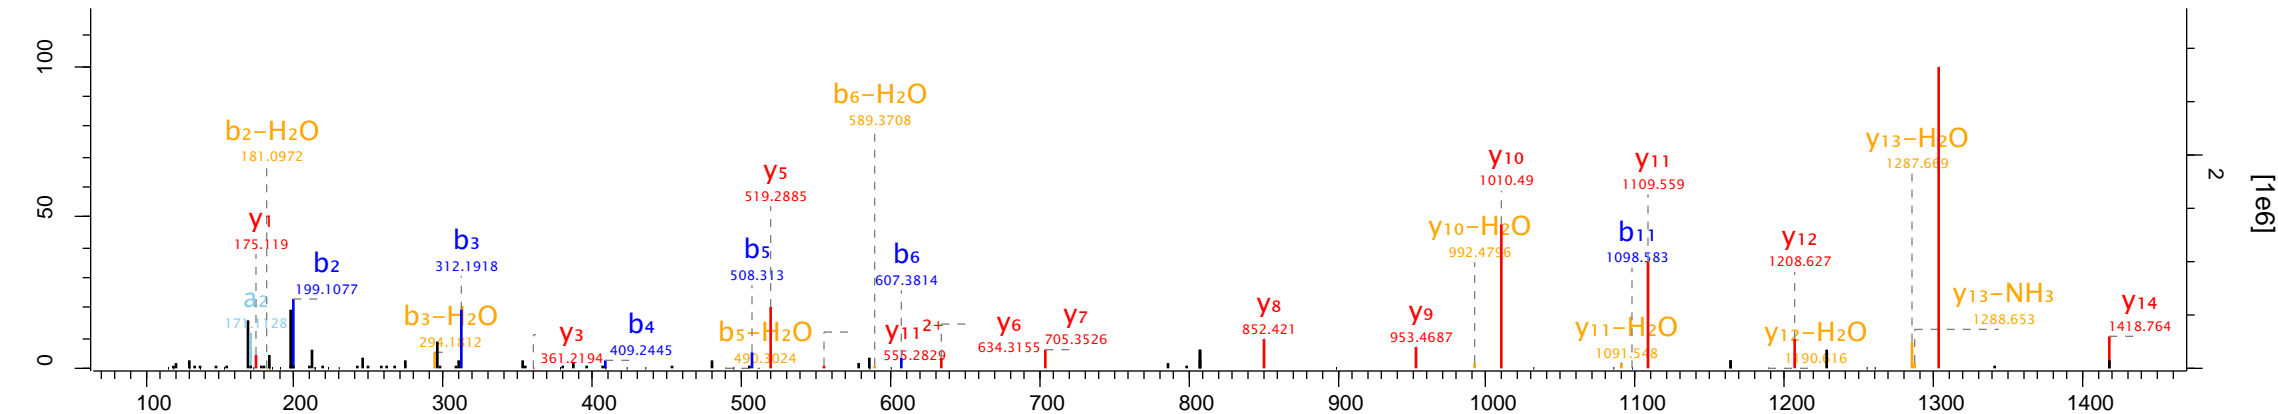

- T P L P V V G T F A D G T S V R -

b<sub>2</sub>
b<sub>3</sub>
b<sub>4</sub>
b<sub>5</sub>
b<sub>6</sub>
b<sub>11</sub>

y<sub>14</sub>
y<sub>13</sub>
y<sub>12</sub>
y<sub>11</sub>
y<sub>10</sub>
y<sub>9</sub>
y<sub>8</sub>
y<sub>7</sub>
y<sub>6</sub>
y<sub>5</sub>
y<sub>3</sub>
y<sub>1</sub>

Raw file Scan Method Score m/z Gene names

20140602\_QEp4\_FaHo\_SA\_RSC4\_18929 FTMS; 153.2 847.4 TY1B-ML1;TY1B-BR;TY1B-H;TY1B-MR2;TY1B-OR;TY1B-NL2;TY1B-PR2;TY1B-DR5;TY1B-PR1;TY1B-JR2;TY1B-NL1;TY1B-OL;TY1B-ML2;TY1B-PR3;TY1B-BL;

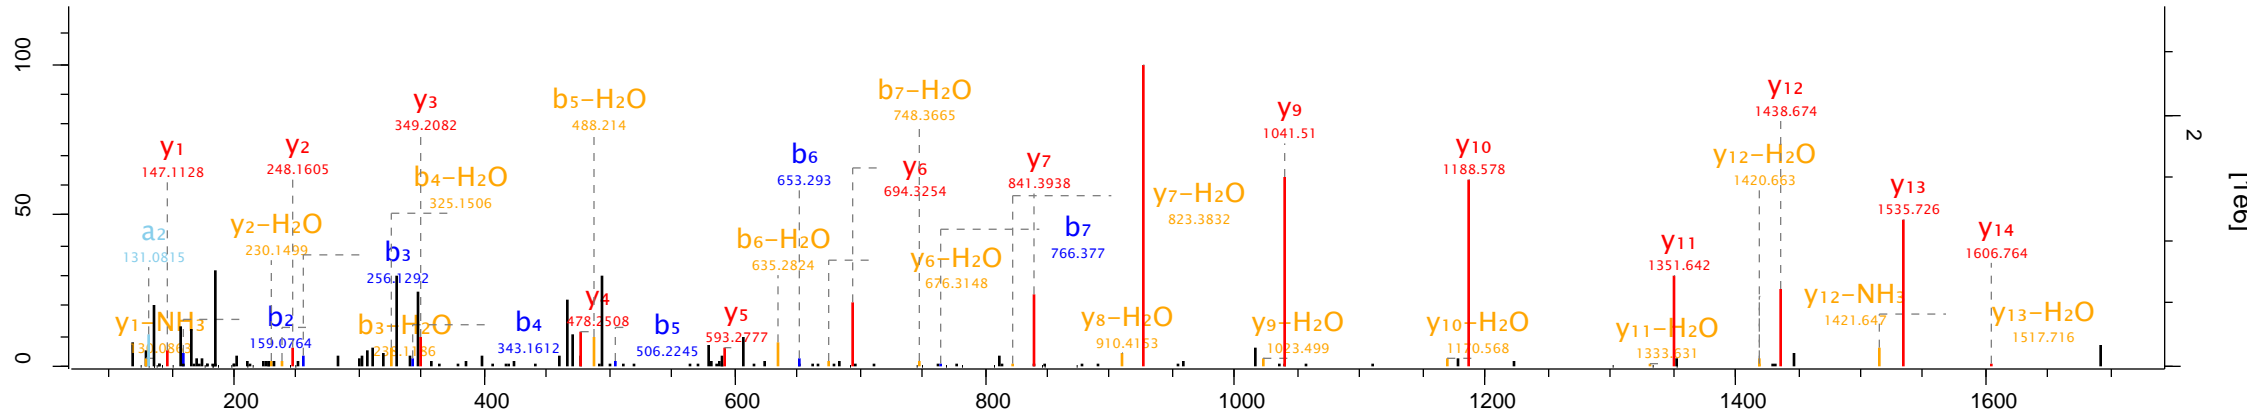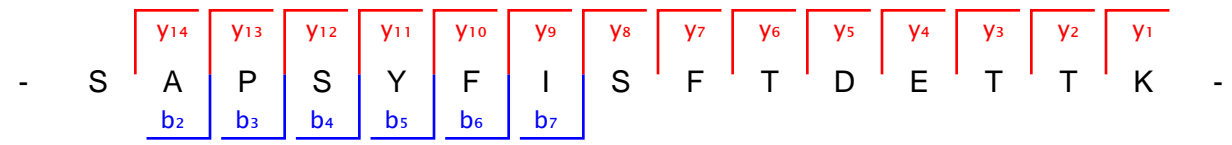

Raw file

Scan Method Score m/z Gene names

20140602\_QEp4\_FaHo\_SA\_RSC4\_01

9096 FTMS; HCD 3.06 786.41 UME6

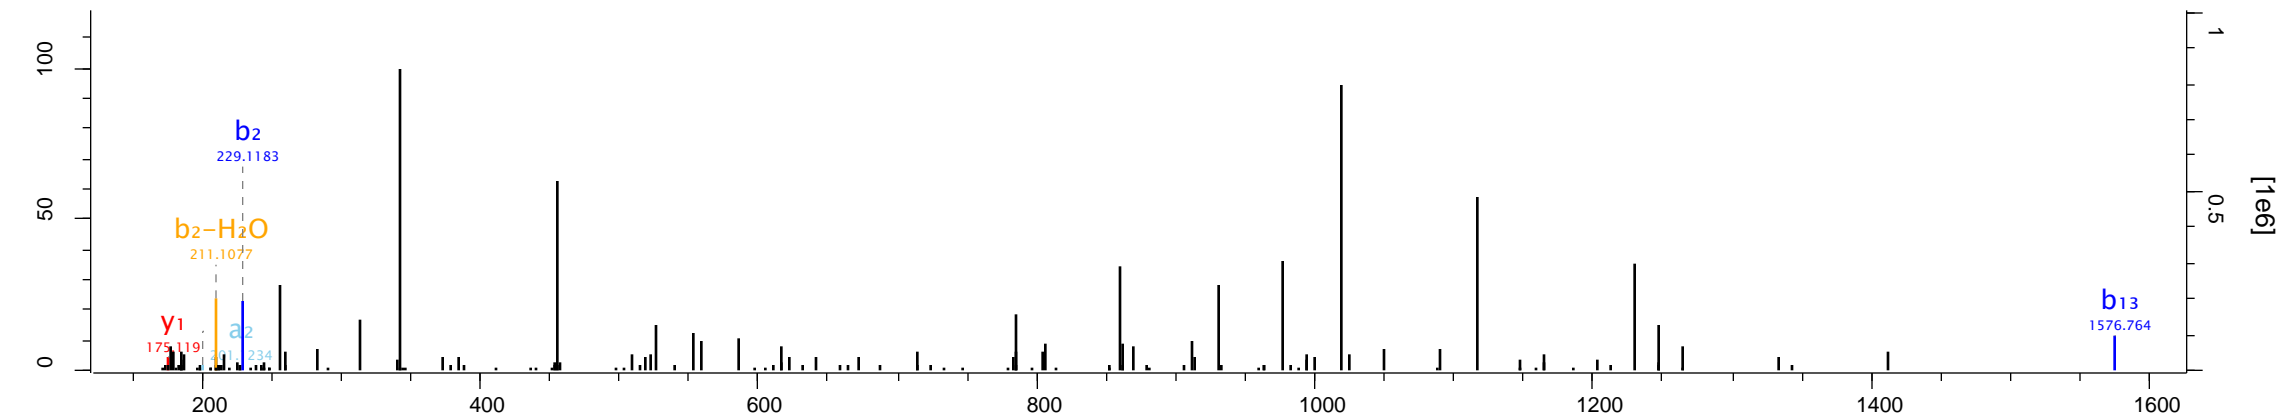

- L D E N E S K I N I S F W L N S K Y R -

b<sub>2</sub> b<sub>13</sub> y<sub>1</sub>

Raw file

Scan Method Score m/z Gene names

20140602\_QEp4\_FaHo\_SA\_RSC4\_0 3219 FTMS; HCC 164.05 698.56 TY1B-ML1;TY1B-MR2;TY1B-OR;TY1B-DR1;TY1B-PR2;TY1B-DR5;TY1B-PR1;TY1B-JR2;TY1B-OL;TY1B-LR4;TY1B-ML2;TY1B-DR3;TY1B-PL;TY1B-LR2;TY1

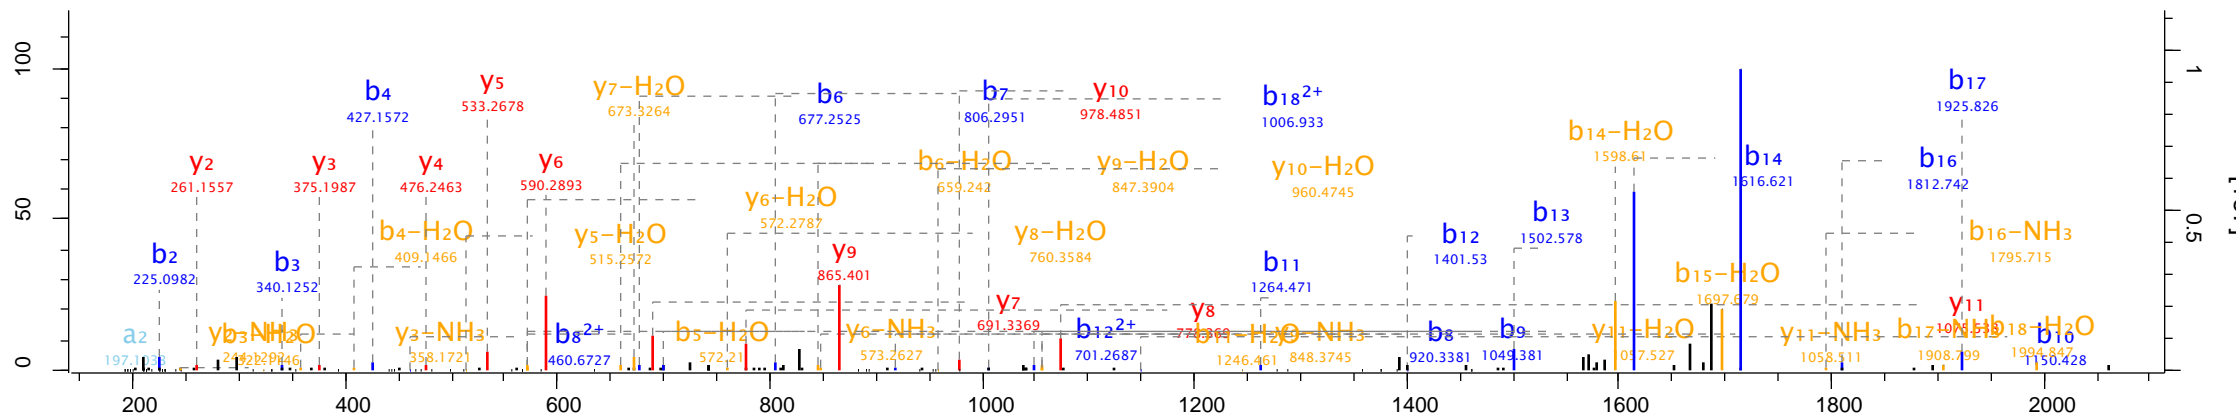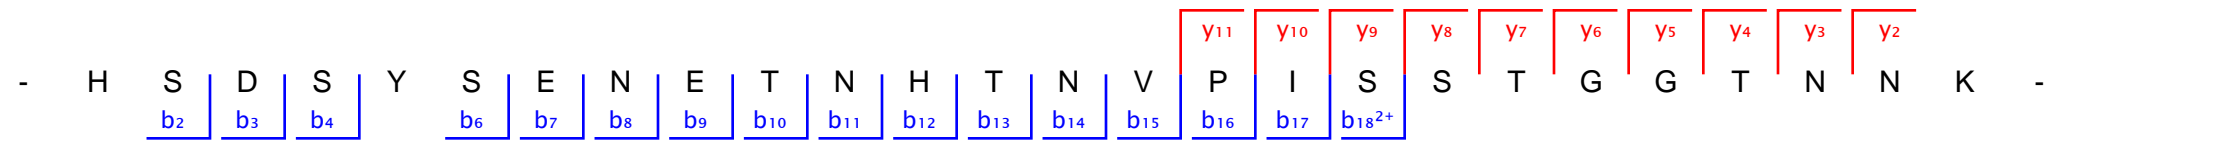

Raw file Scan Method Score m/z Gene names

20140602\_QEp4\_FaHo\_SA\_RSC4\_02 7587 FTMS; HCD 157.68 650.69 TIF6

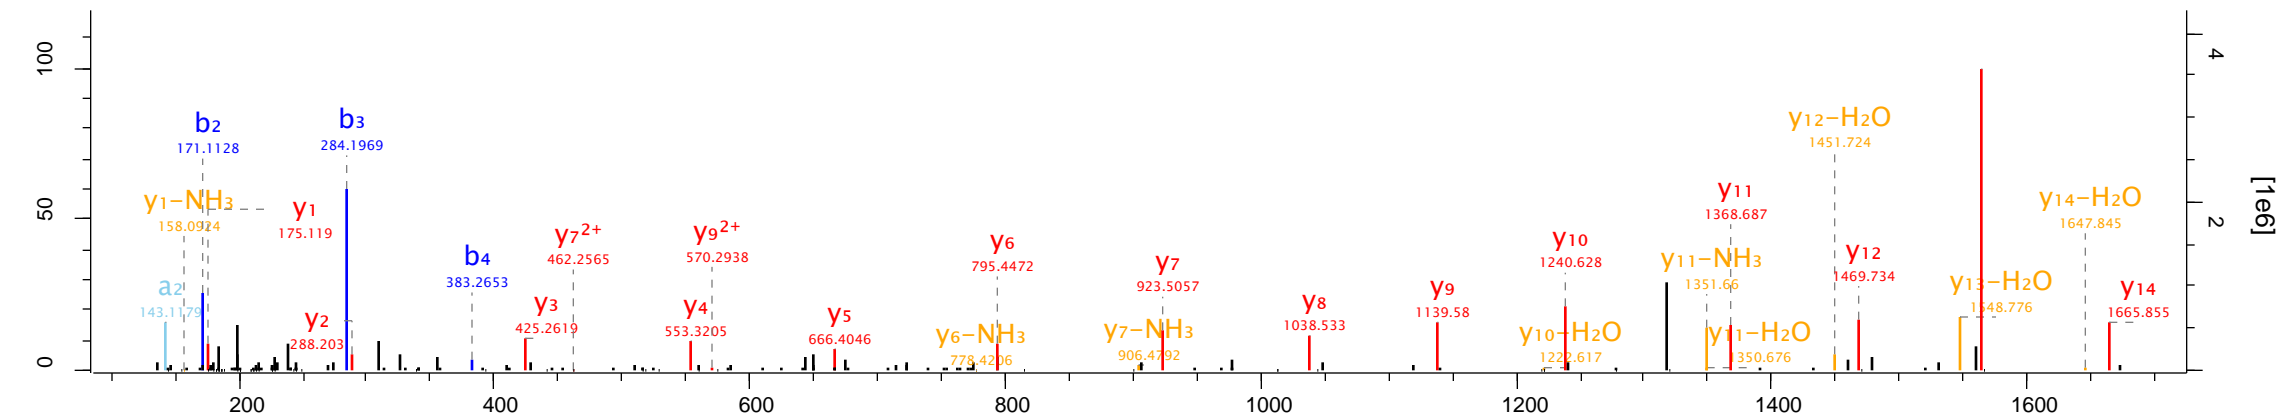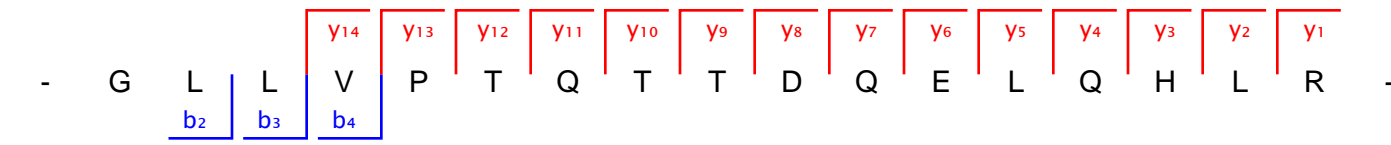

Raw file

Scan Method Score m/z Gene names

20140602\_QEp4\_FaHo\_SA\_RSC4\_02

8241 FTMS; HCD 209.6 832.41 RPP1B

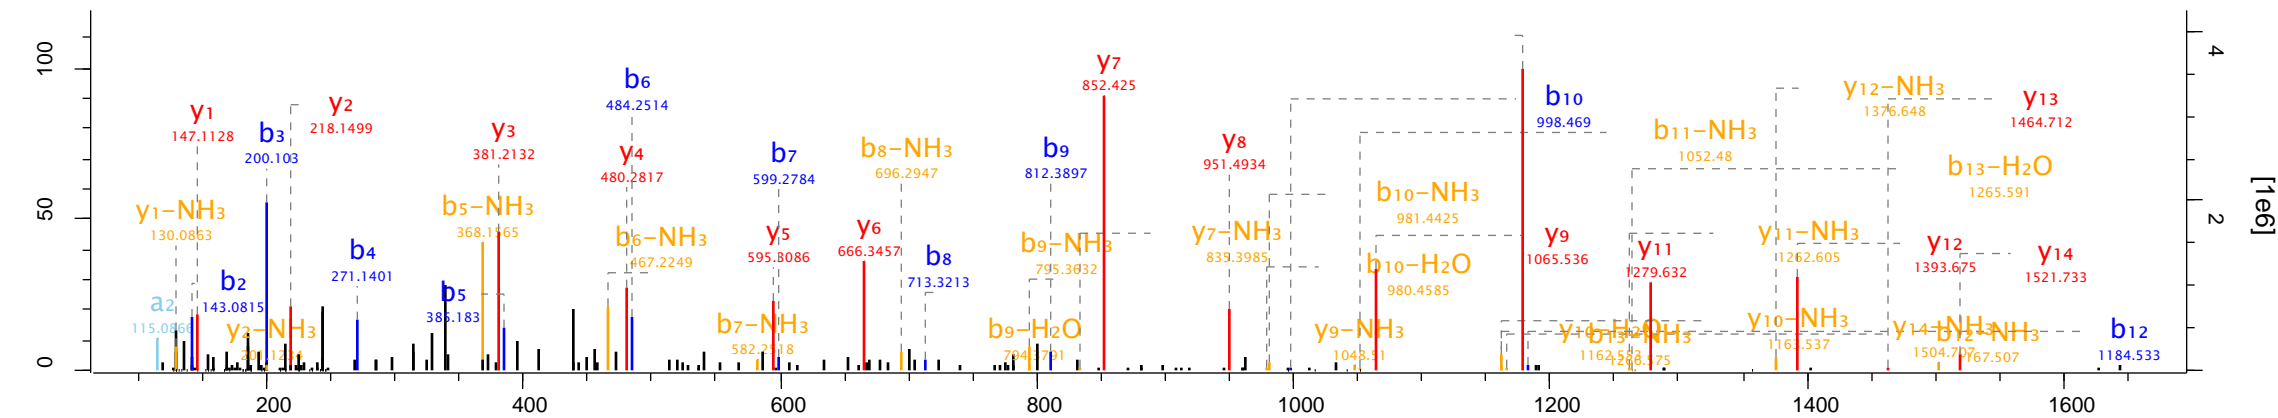

- A A A G A N V D N V W A D V Y A K -

b<sub>2</sub> b<sub>3</sub> b<sub>4</sub> b<sub>5</sub> b<sub>6</sub> b<sub>7</sub> b<sub>8</sub> b<sub>9</sub> b<sub>10</sub> b<sub>12</sub>

y<sub>14</sub> y<sub>13</sub> y<sub>12</sub> y<sub>11</sub> y<sub>10</sub> y<sub>9</sub> y<sub>8</sub> y<sub>7</sub> y<sub>6</sub> y<sub>5</sub> y<sub>4</sub> y<sub>3</sub> y<sub>2</sub> y<sub>1</sub>



Raw file

20140602\_QEp4\_FaHo\_SA\_RSC4\_02

Scan Method Score m/z Gene names

9555 FTMS; HCD 64.86 857.73 SEC13

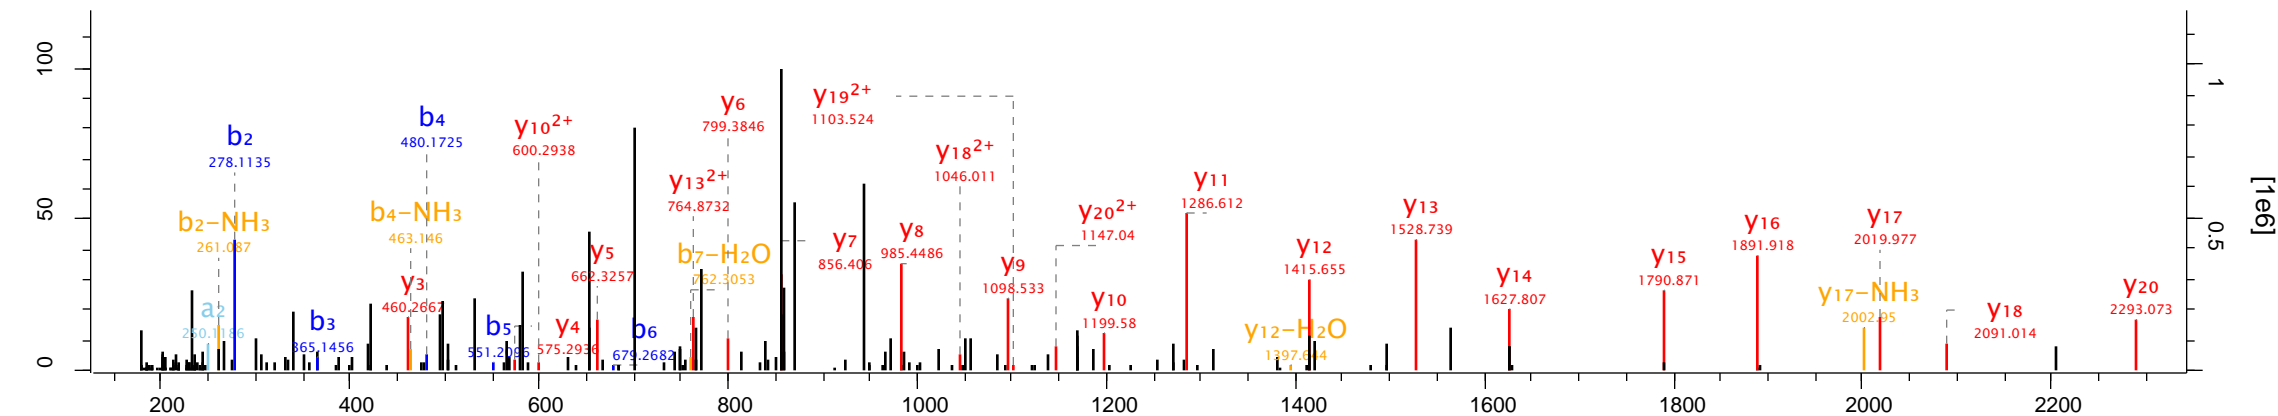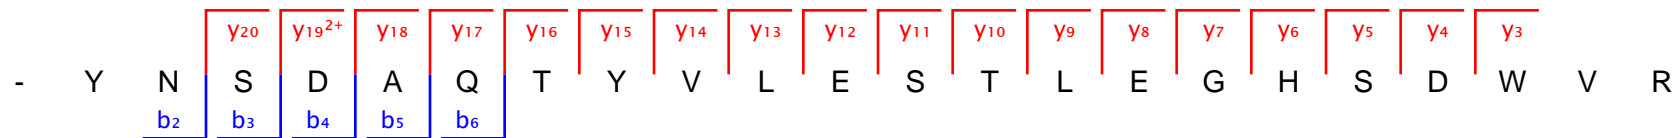

| Raw file                      | Scan | Method    | Score | m/z    | Gene names |
|-------------------------------|------|-----------|-------|--------|------------|
| 20140602_QEp4_FaHo_SA_RSC4_02 | 9910 | FTMS; HCD | 108.7 | 550.34 | MNP1       |

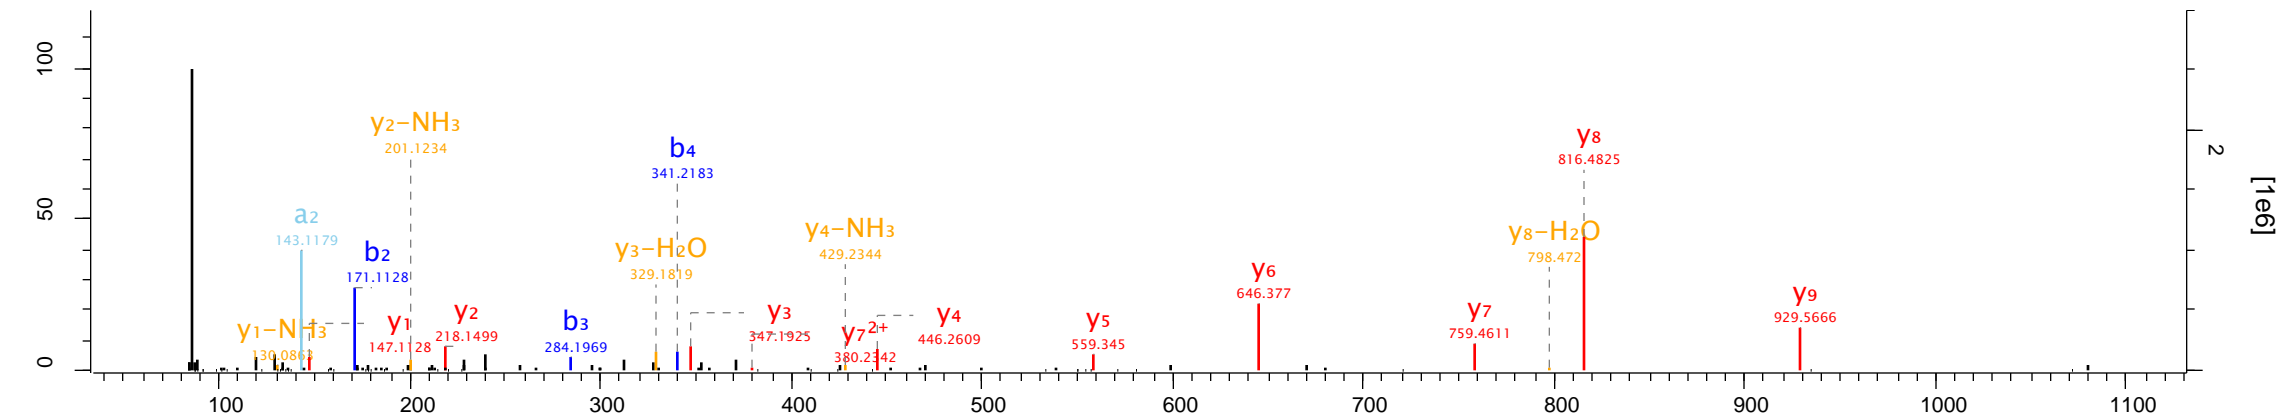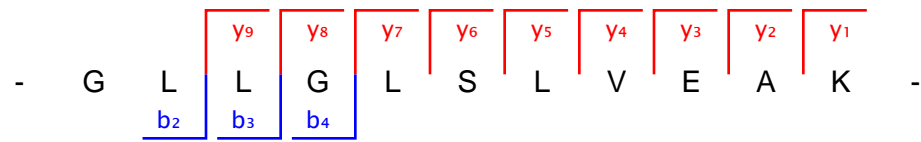

Raw file Scan Method Score m/z Gene names

20140602\_QEp4\_FaHo\_SA\_RSC4\_03 7110 FTMS; HCD 102.64 784.44 MIC26

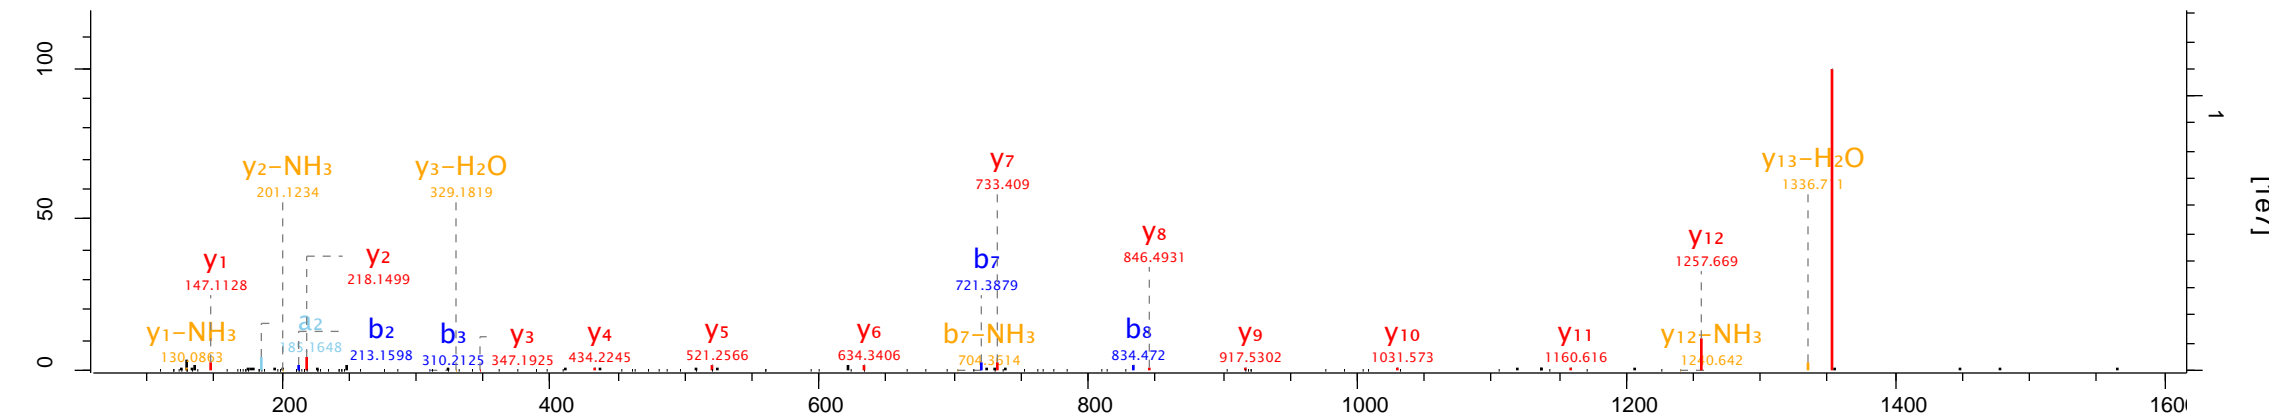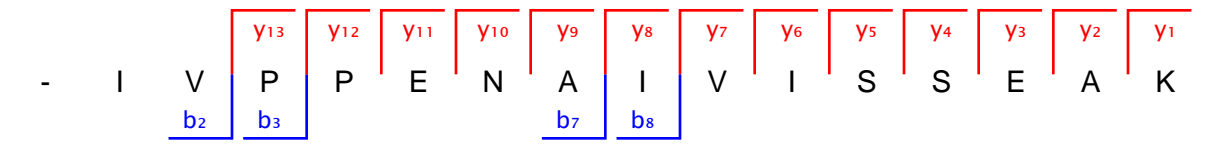

Raw file

Sca Metho Sco m/z Gene names

20140602\_QEp4\_Fal 79! FTMSC 740! 480 TY1B-ML1;TY1B-BR;TY1B-H;TY1B-MR2;TY1B-OR;TY1B-DR1;TY1B-NL2;TY1B-PR2;TY1B-DR5;TY1B-PR1;TY1B-JR2;TY1B-NL1;TY2B-C;TY1B-OL;TY1B-LR4;TY1B-ML2;TY1B-DR3;TY1

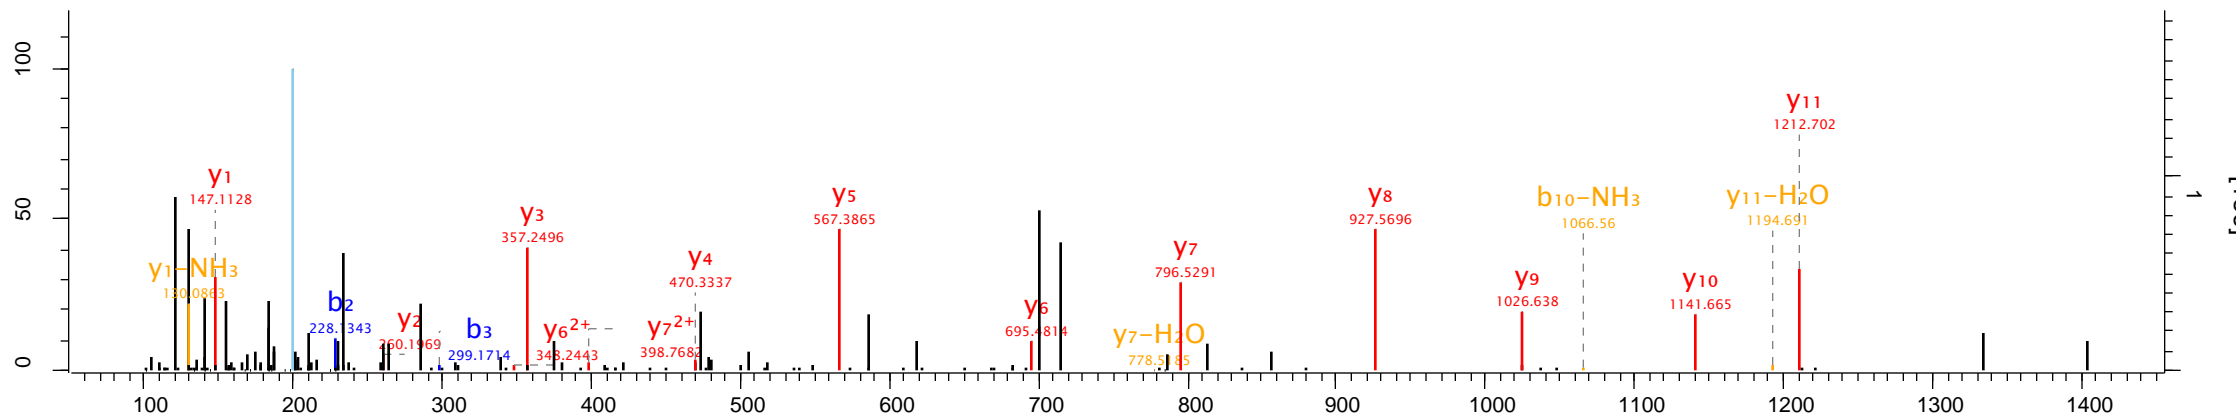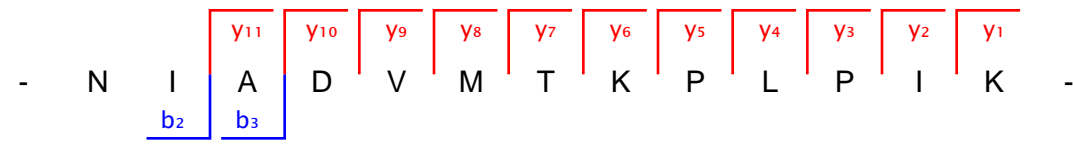

Raw file Scan Method Score m/z Gene names  
 20140602\_QEp4\_FaHo\_SA\_RSC4\_03 9400 FTMS; HCD 117 632.67 MRPL9

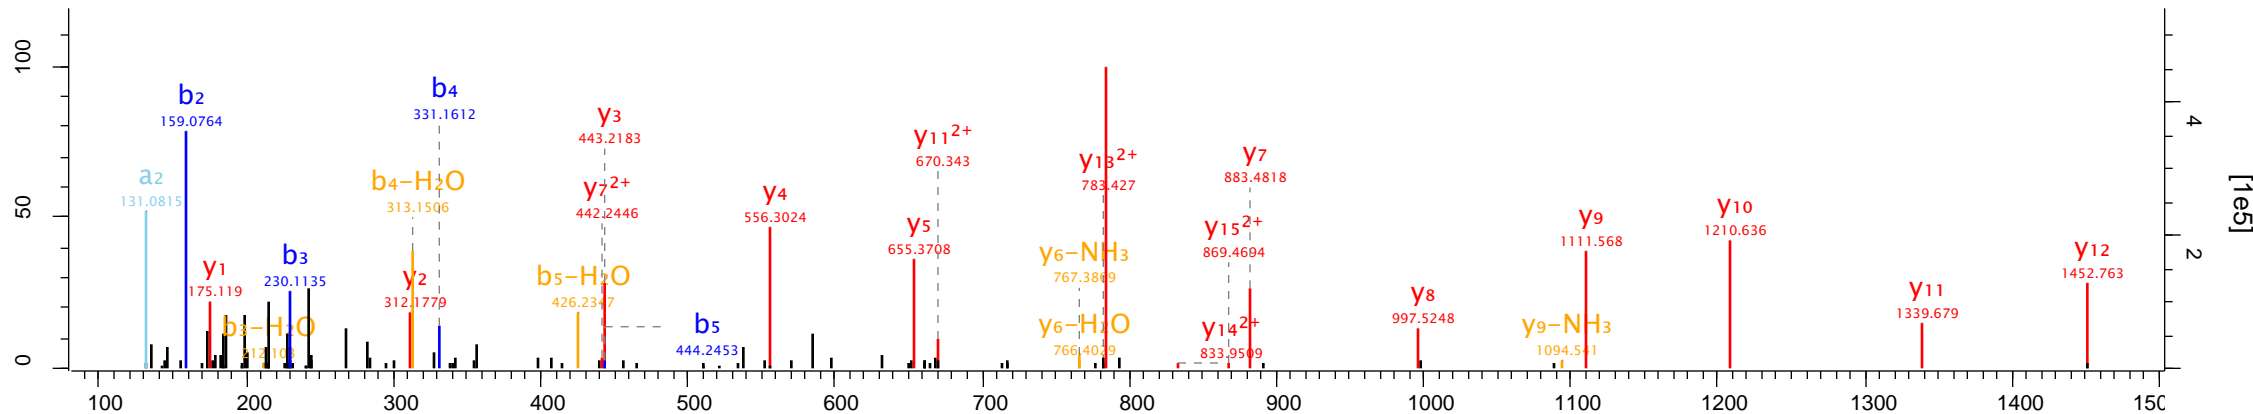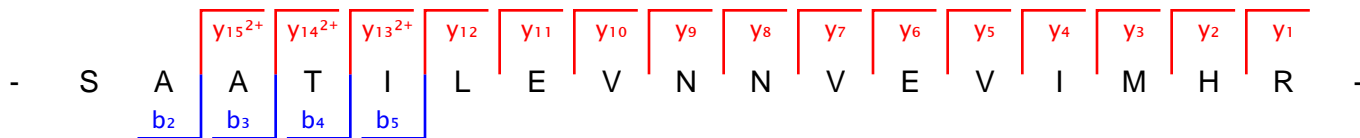

20140602\_QEp4\_FaHo\_SA\_436.FTMS; 128.2778.8 TY1B-ML1;TY1B-BR;TY1B-H;TY1B-MR2;TY1B-OR;TY1B-DR1;TY1B-NL2;TY1B-PR2;TY1B-DR5;TY1B-PR1;TY1B-JR2;TY1B-NL1;TY1B-OL;TY1B-LR4;TY1B-ML2;TY1B-DR3;

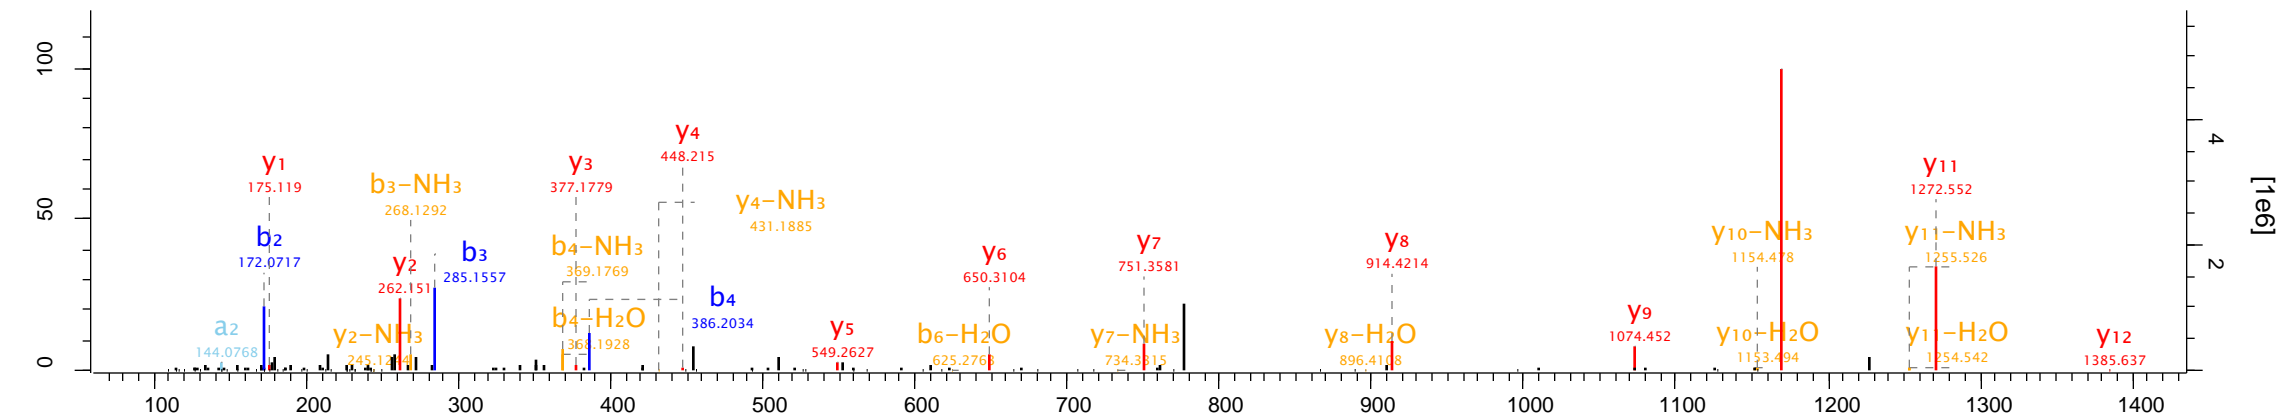

- N G I T P C Y T T T A D S R -

b<sub>2</sub> b<sub>3</sub> b<sub>4</sub>

y<sub>12</sub> y<sub>11</sub> y<sub>10</sub> y<sub>9</sub> y<sub>8</sub> y<sub>7</sub> y<sub>6</sub> y<sub>5</sub> y<sub>4</sub> y<sub>3</sub> y<sub>2</sub> y<sub>1</sub>

Raw file Scan Method Score m/z Gene names

20140602\_QEp4\_FaHo\_SA\_RSC8\_01 5438 FTMS; HCD 111.86 550.31 DBP2

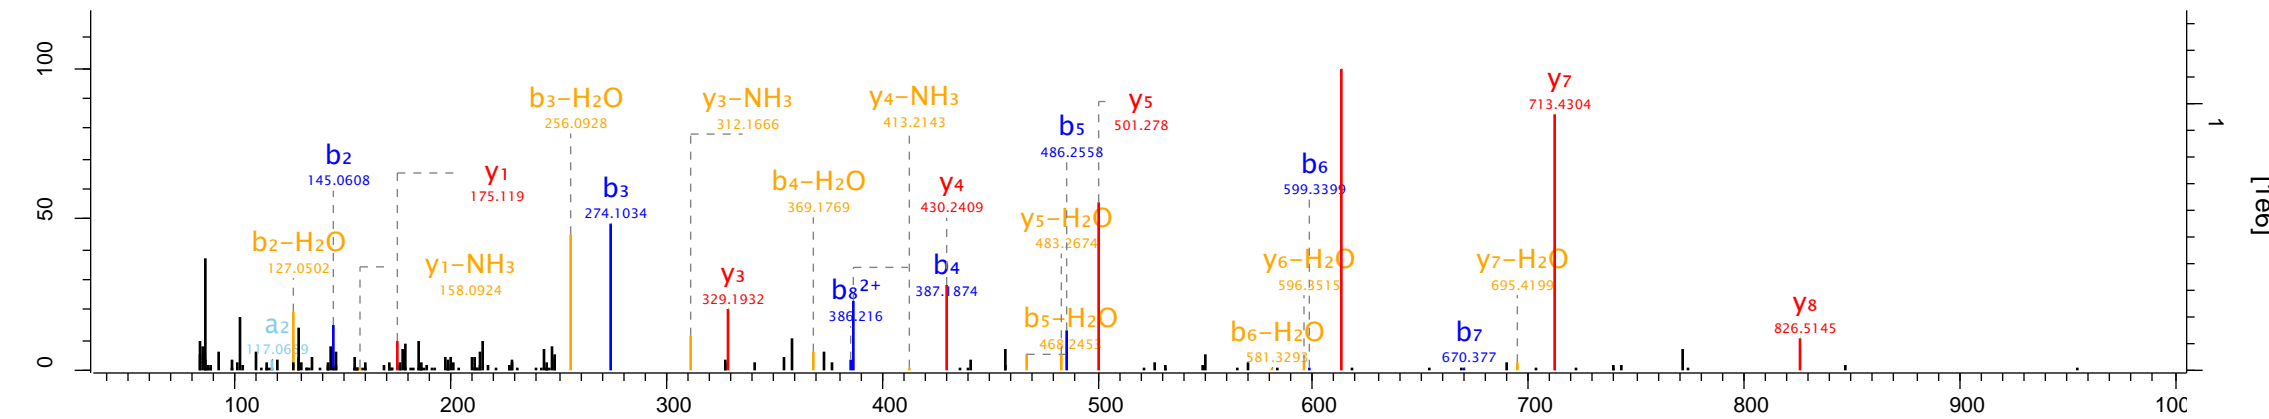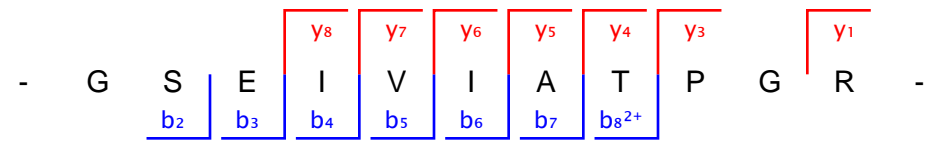

| Raw file                      | Scan | Method    | Score  | m/z    | Gene names |
|-------------------------------|------|-----------|--------|--------|------------|
| 20140602_QEp4_FaHo_SA_RSC8_01 | 5917 | FTMS; HCD | 106.04 | 457.26 | VTC1       |

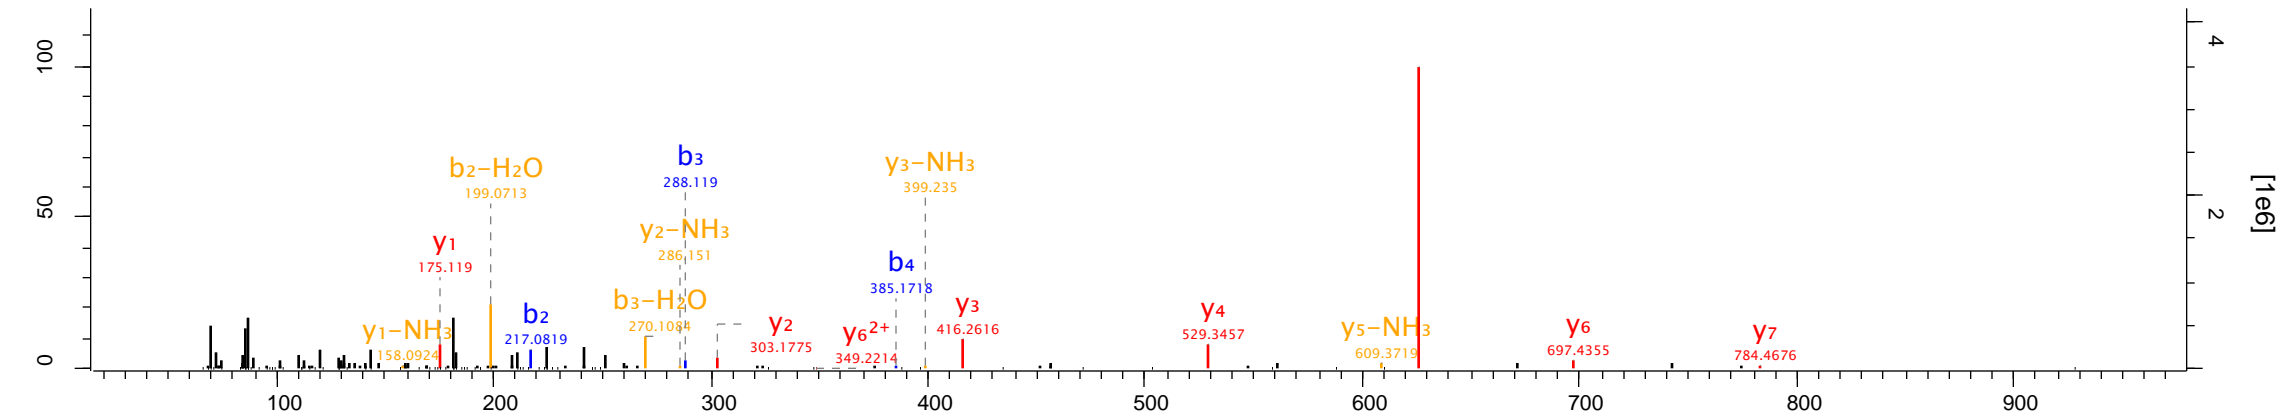

ac

- S S A P L L Q R -

b<sub>2</sub> b<sub>3</sub> b<sub>4</sub>

y<sub>7</sub> y<sub>6</sub> y<sub>5</sub> y<sub>4</sub> y<sub>3</sub> y<sub>2</sub> y<sub>1</sub>



| Raw file                      | Scan | Method    | Score  | m/z    | Gene names |
|-------------------------------|------|-----------|--------|--------|------------|
| 20140602_QEp4_FaHo_SA_RSC8_01 | 6809 | FTMS; HCD | 113.65 | 826.38 | ACPI       |

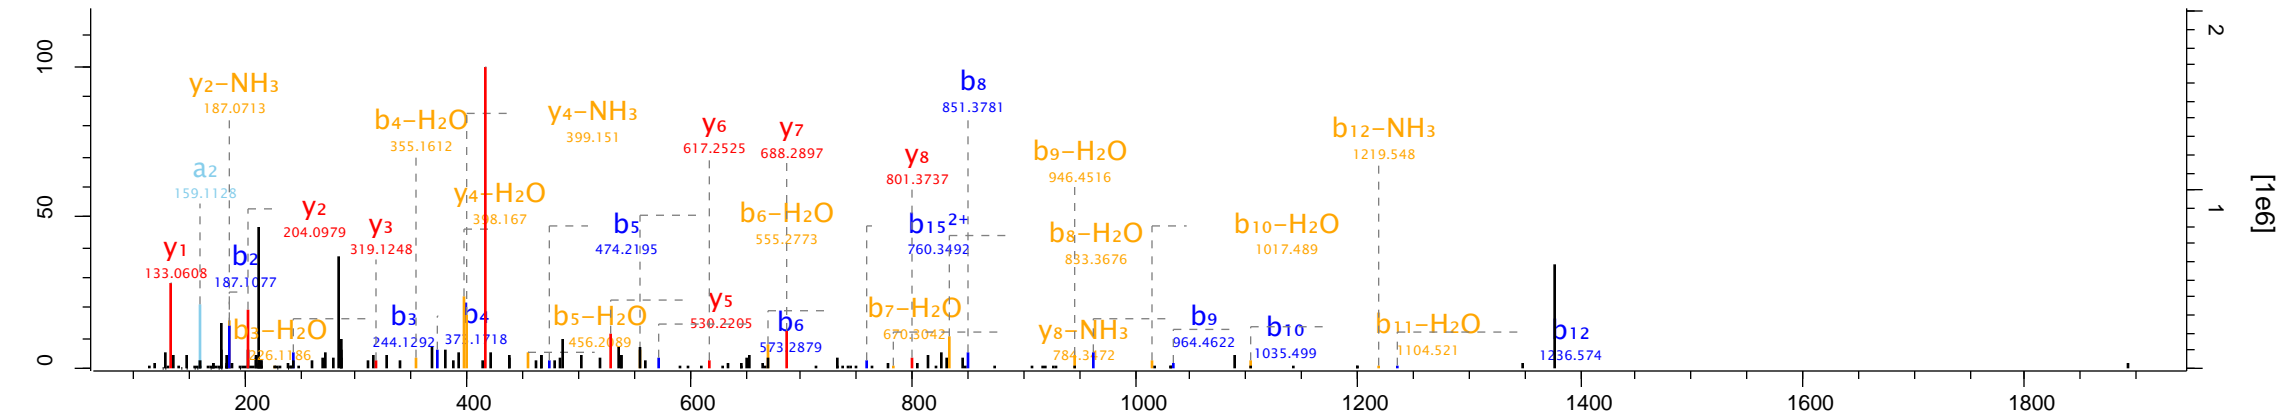

- S V G E T V D Y I A S N P D A N -

Fragmentation mapping:

- b<sub>2</sub> (V), b<sub>3</sub> (G), b<sub>4</sub> (E), b<sub>5</sub> (T), b<sub>6</sub> (V)
- b<sub>8</sub> (Y), b<sub>9</sub> (I), b<sub>10</sub> (A)
- b<sub>12</sub> (N), b<sub>15<sup>2+</sup></sub> (A)

Y-ion fragmentation mapping:

- y<sub>1</sub> (N), y<sub>2</sub> (A), y<sub>3</sub> (D), y<sub>4</sub> (P), y<sub>5</sub> (N), y<sub>6</sub> (S), y<sub>7</sub> (A), y<sub>8</sub> (I)

Raw file Scan Method Score m/z Gene names

20140602\_QEp4\_FaHo\_SA\_RSC8\_01 7530 FTMS; HCD 66.11 628.33 TY2B-C;TY2B-B;TY2B-GR1;TY2A-GR1;TY2B-OR1;TY2A-DR2;TY2B-DR1;TY2B-DR3;TY2B-LR1;TY2B-OR2;TY2A-OR1;TY2A-LR2;TY2A-OR2;TY2A-B

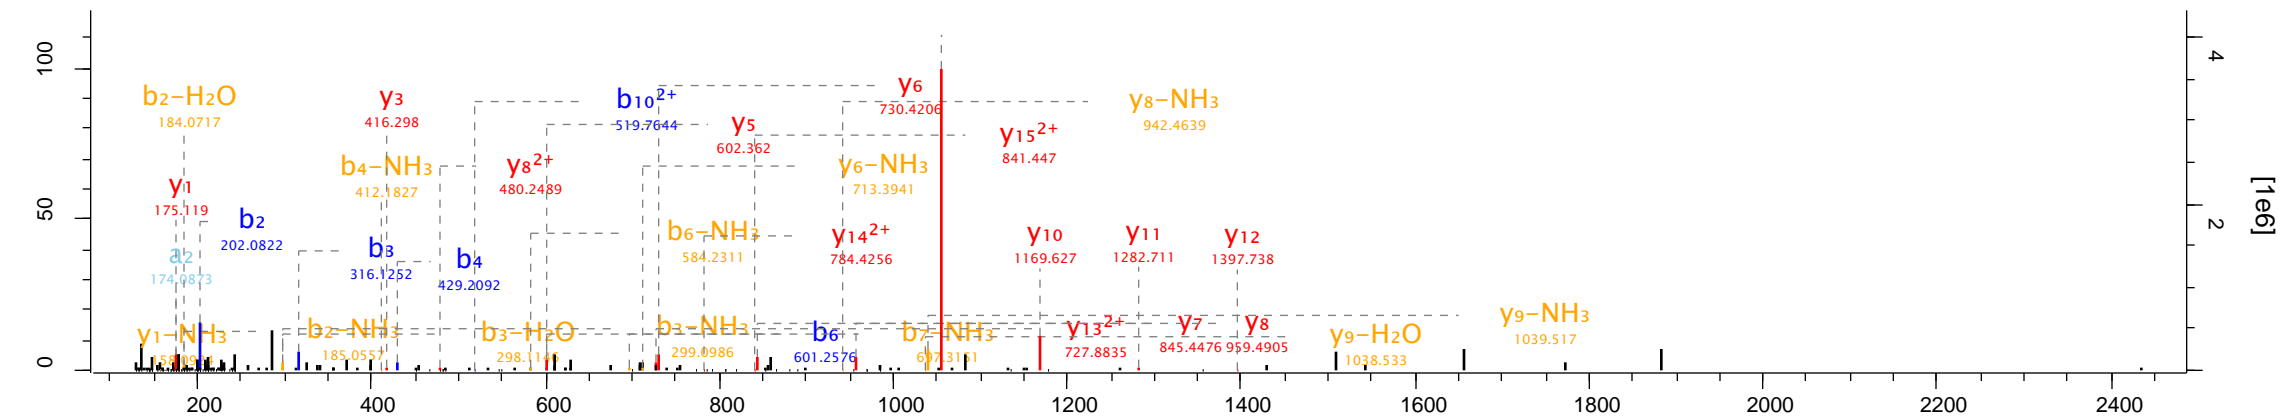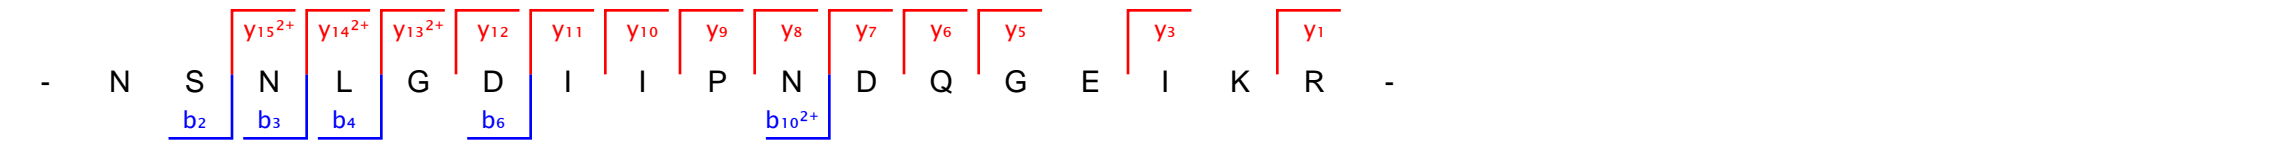

Raw file 20140602\_QEp4\_FaHo\_SA\_RSC8\_01 Scan 9641 Method FTMS; HCD Score 195.92 m/z 923.99 Gene names RPL4B;RPL4A

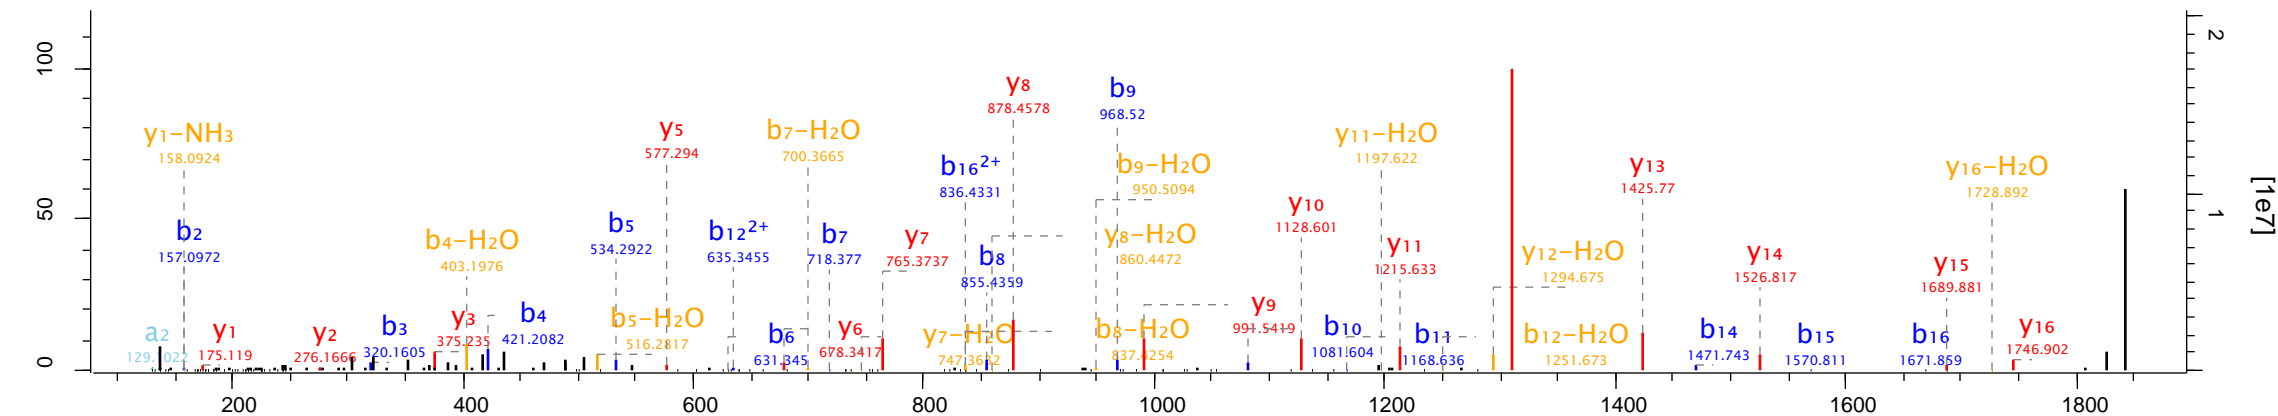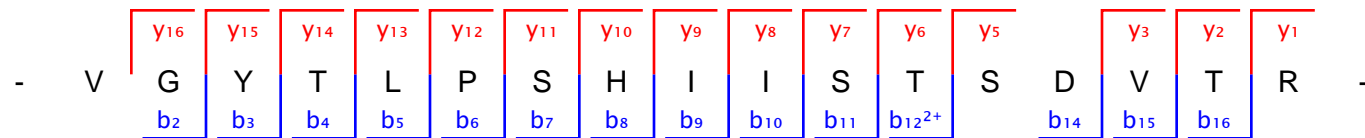

Raw file 20140602\_QEp4\_FaHo\_SA\_RSC8\_01 Scan 9733 Method FTMS; HCD Score 140.73 m/z 727.35 Gene names RPS14B;RPS14A

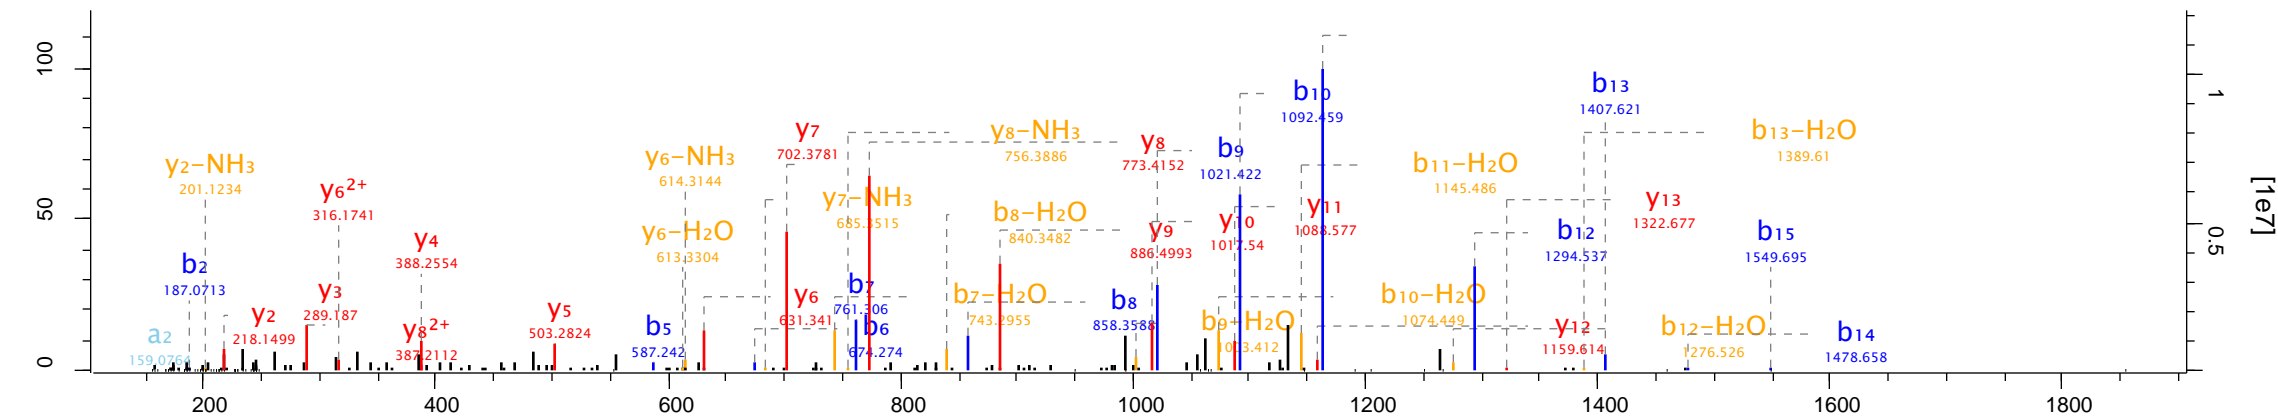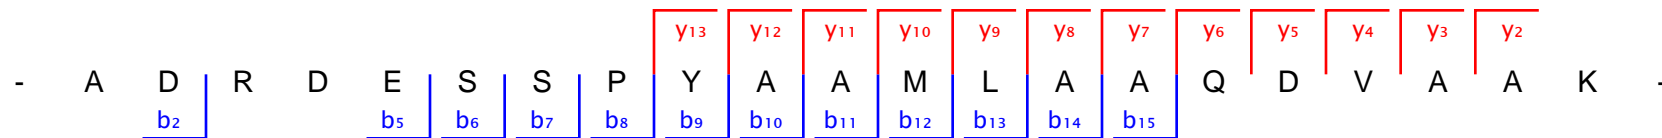

Raw file Scan Method Score m/z Gene names  
 20140602\_QEp4\_FaHo\_SA\_RSC8\_01 10067 FTMS; HCD 299.56 901.14 RPL17A;RPL17B

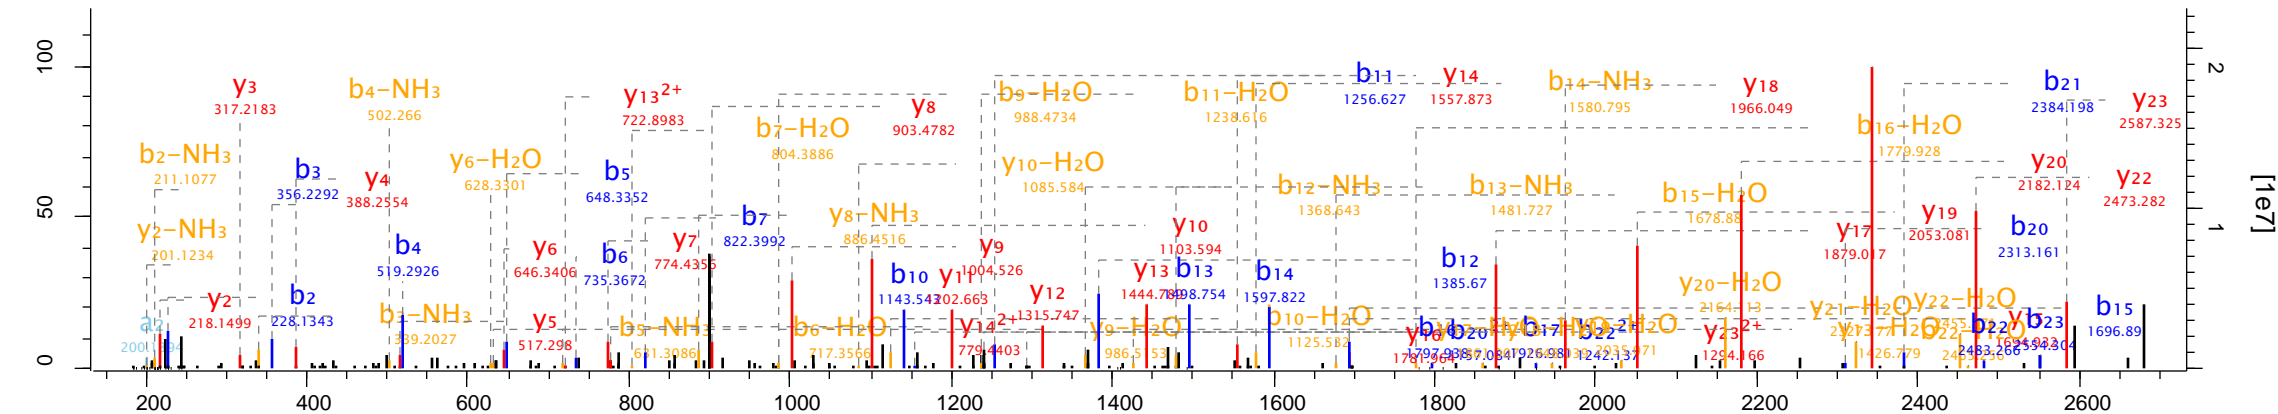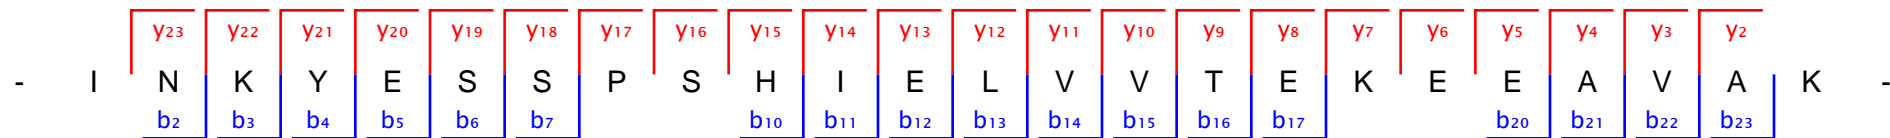

Raw file 20140602\_QEp4\_FaHo\_SA\_RSC8\_01 Scan 10079 Method FTMS; HCD Score 107.73 m/z 645.01 Gene names RFA3

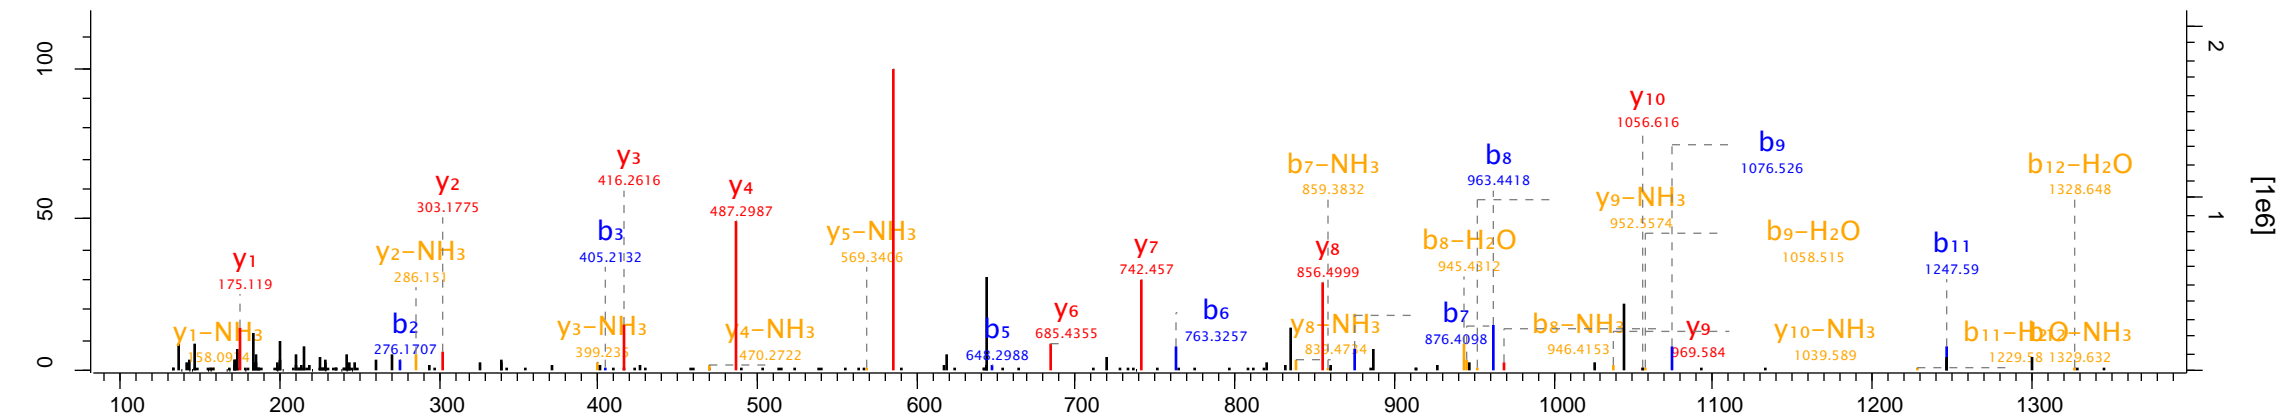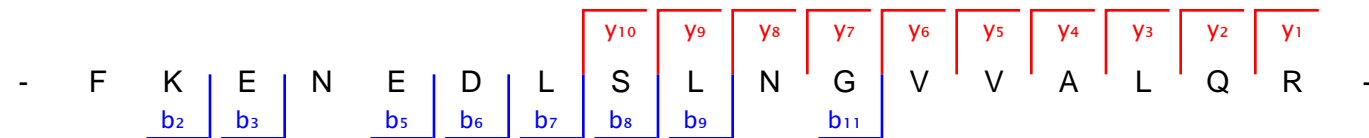

Raw file Scan Method Score m/z Gene names

20140602\_QEp4\_FaHo\_SA\_RSC8\_02 177 FTMS; HCD 135.84 423.21 TY1B-ML1;TY1B-BR;TY1A-PR1;TY1A-A;TY1A-DR4;TY1B-H;TY1B-MR2;TY1B-OR;TY1B-DR1;TY1B-NL2;TY1B-PR2;TY1B-DR5;TY1B-PR1;TY1B-JR2;TY1

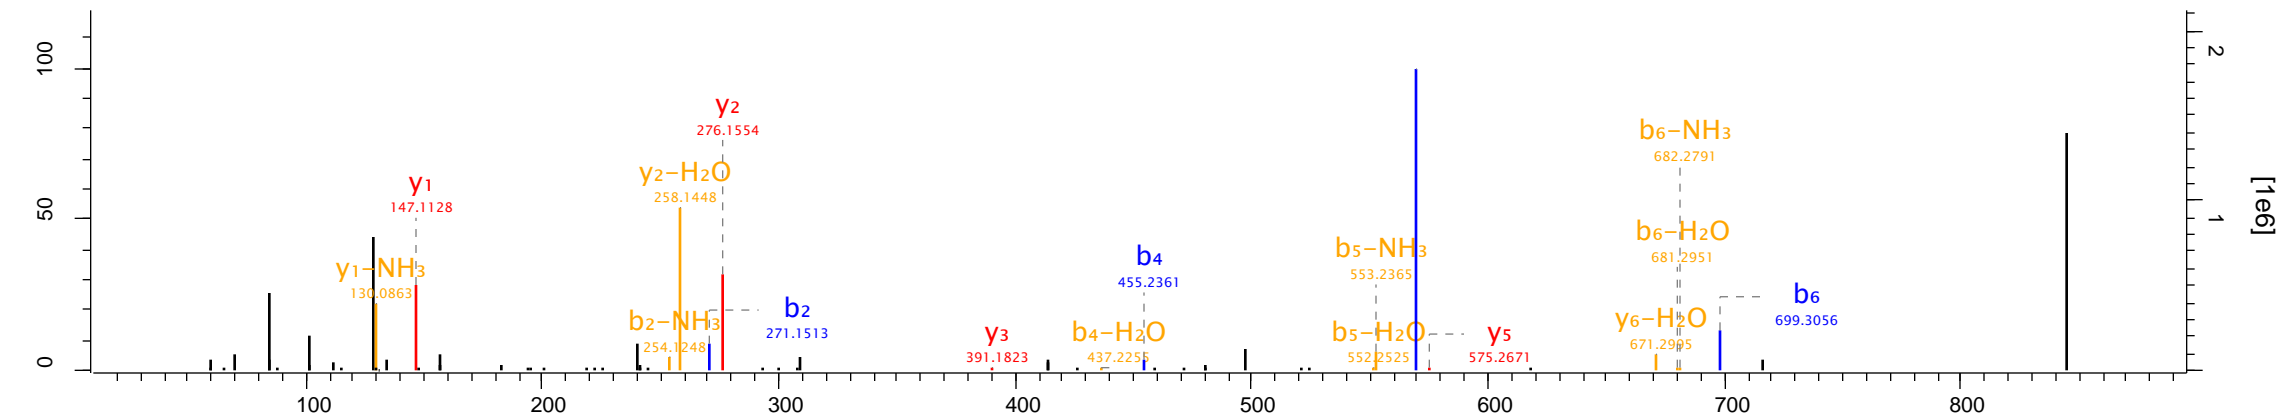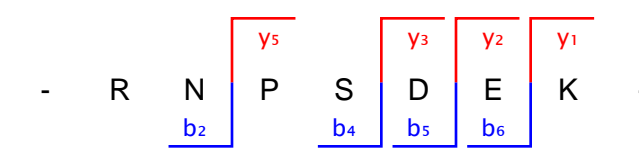

| Raw file                      | Scan | Method    | Score | m/z    | Gene names  |
|-------------------------------|------|-----------|-------|--------|-------------|
| 20140602_QEp4_FaHo_SA_RSC8_02 | 3398 | FTMS; HCD | 74.44 | 351.21 | RPL4B;RPL4A |

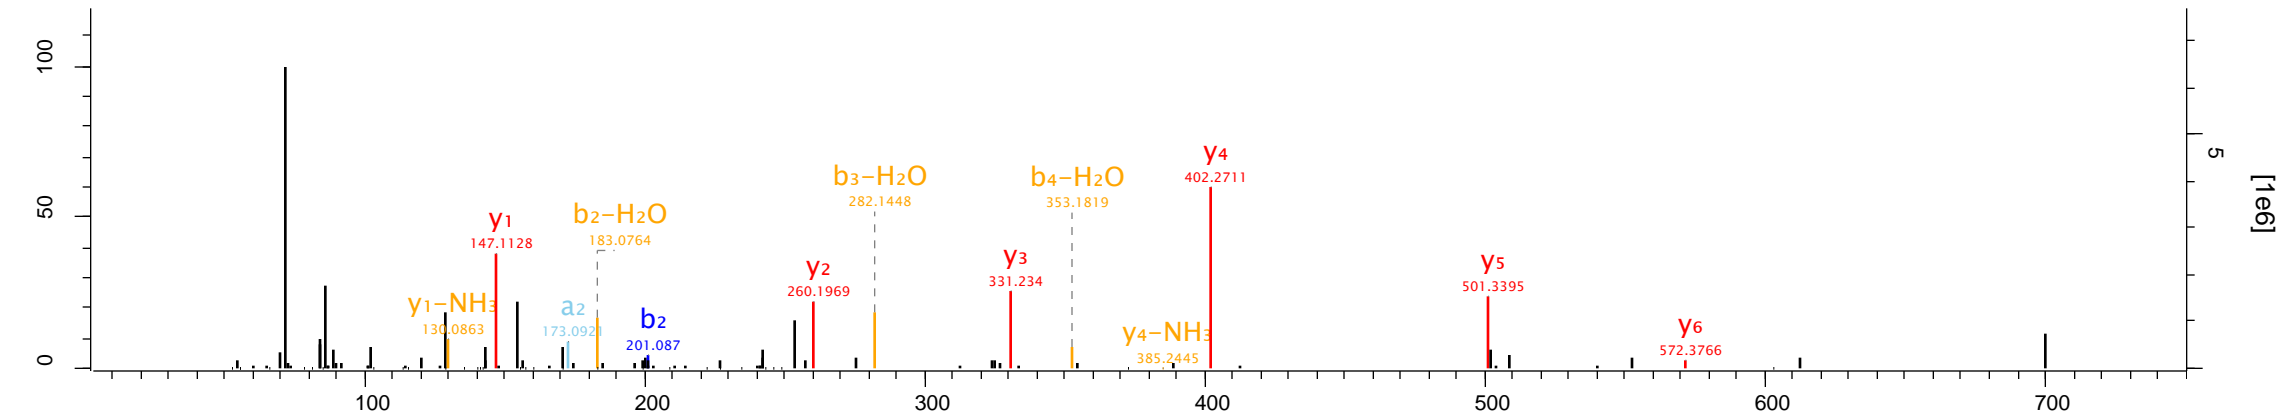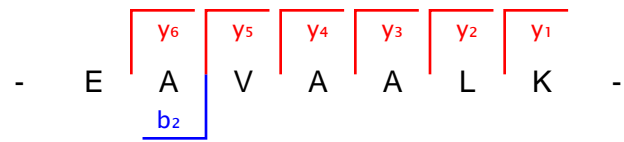



Raw file Scan Method Score m/z Gene names

20140602\_QEp4\_FaHo\_SA\_RSC8\_C 6206 FTMS; 402.03 867.4 TY1A-PR1;TY1A-A;TY1A-DR4;TY1B-NL2;TY1B-PR1;TY1B-NL1;TY1A-PL;TY1A-LR2;TY1A-ER1;TY1A-DR6;TY1B-PL;TY1B-LR2;TY1B-DR6;TY1A-DR2;TY1B-

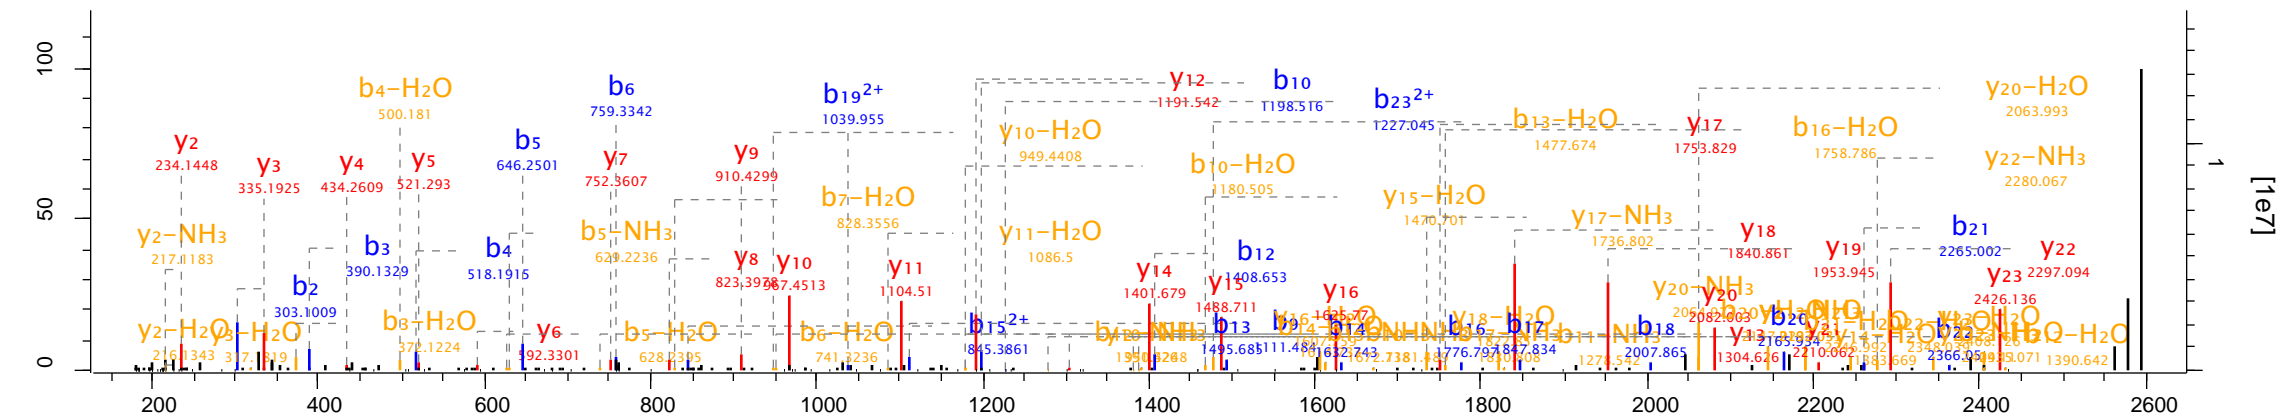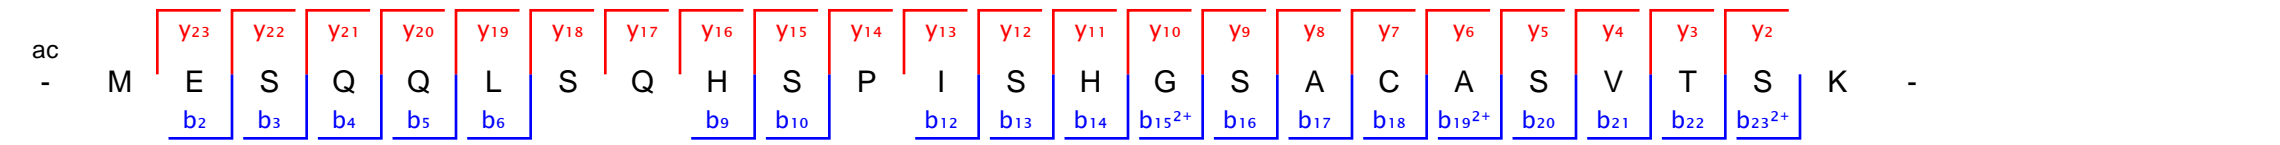

Raw file 20140602\_QEp4\_FaHo\_SA\_RSC8\_03 Scan 7920 Method FTMS; HCD Score 182.02 m/z 808.74 Gene names RPS14B;RPS14A

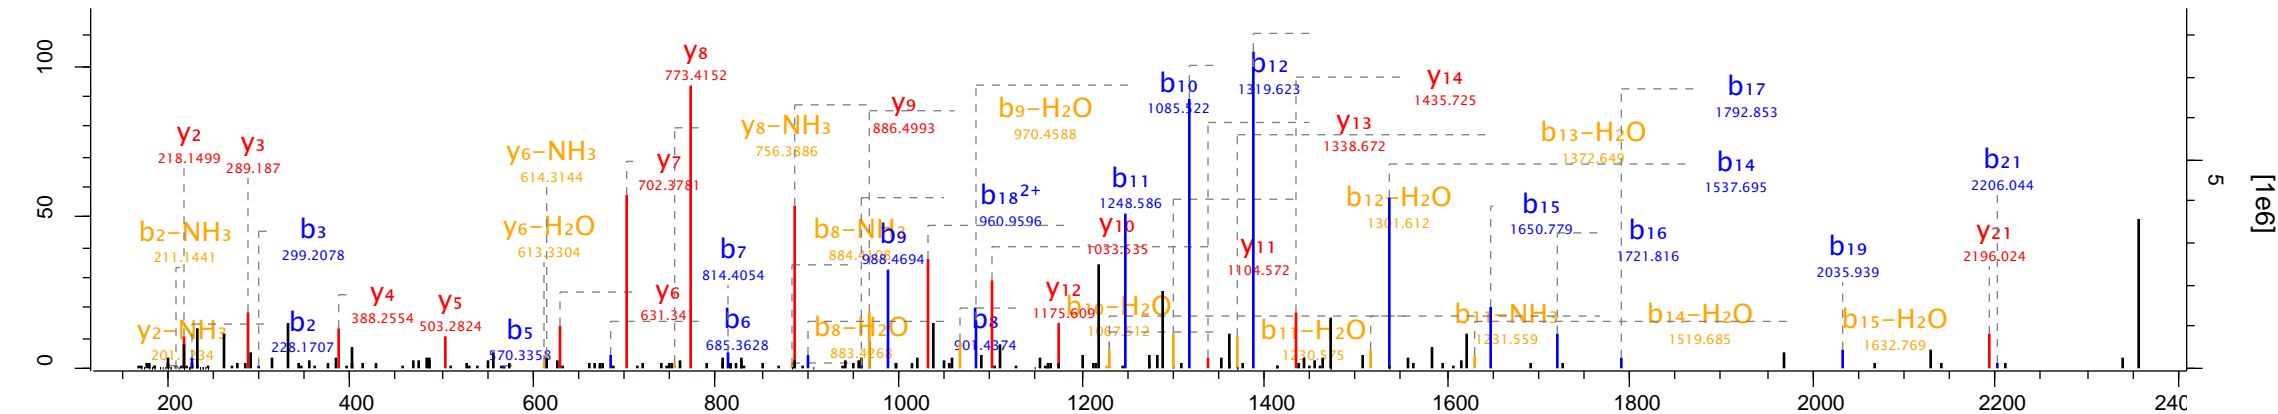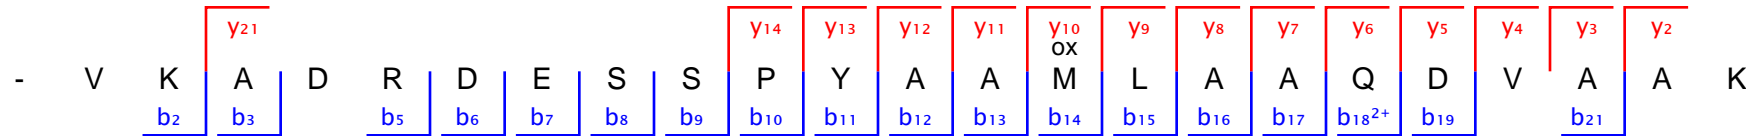

| Raw file                      | Scan | Method    | Score | m/z    | Gene names |
|-------------------------------|------|-----------|-------|--------|------------|
| 20140602_QEp4_FaHo_SA_RSC8_03 | 9291 | FTMS; HCD | 94.2  | 422.48 | RPL4B      |

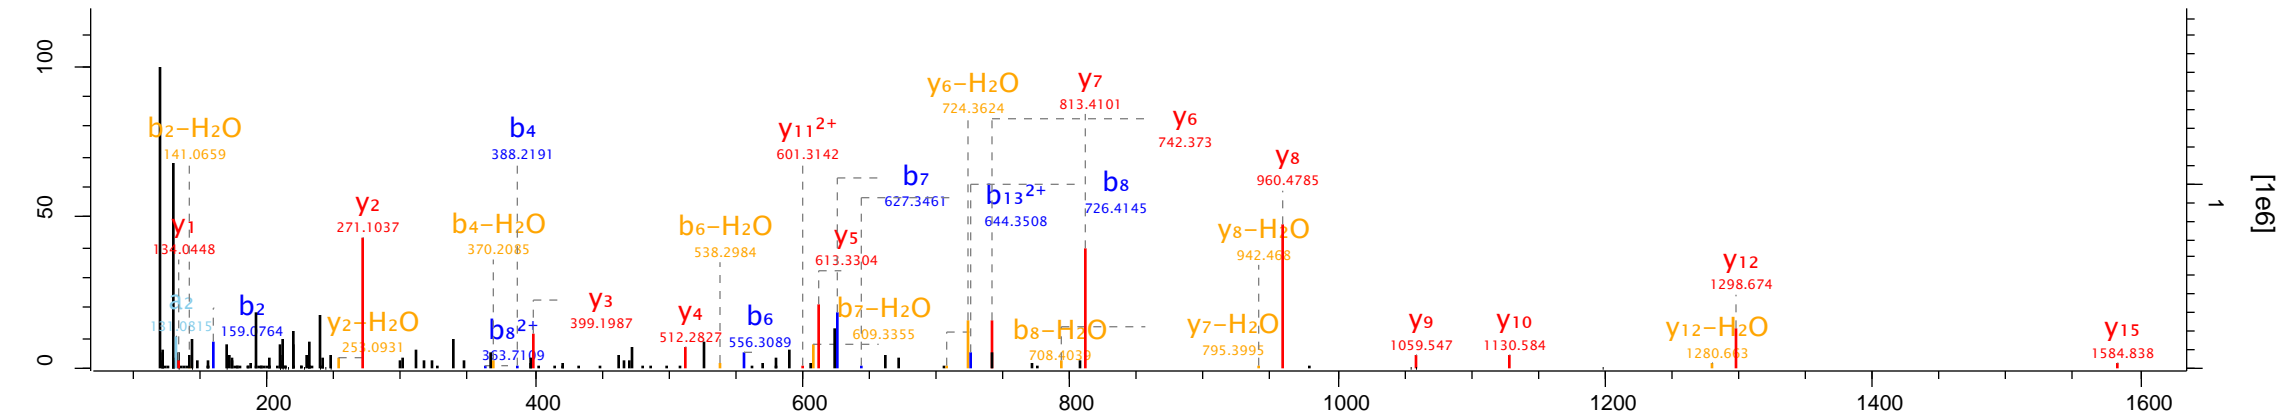

- T G T K P A A V F A E T L K H D -  
b<sub>2</sub> b<sub>4</sub> b<sub>6</sub> b<sub>7</sub> b<sub>8</sub> b<sub>13</sub><sup>2+</sup>

| Raw file                      | Scan | Method    | Score  | m/z    | Gene names  |
|-------------------------------|------|-----------|--------|--------|-------------|
| 20140602_QEp4_FaHo_SA_RSC8_03 | 9334 | FTMS; HCD | 120.86 | 436.24 | RPL9A;RPL9B |

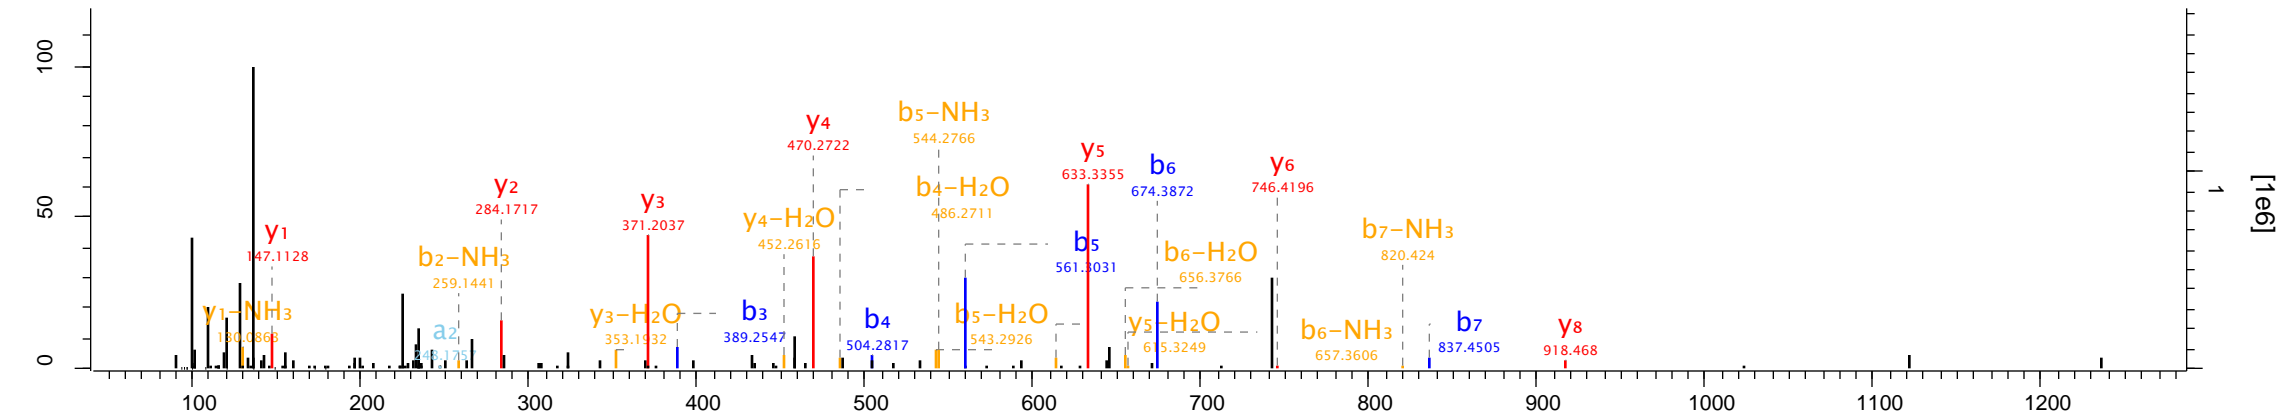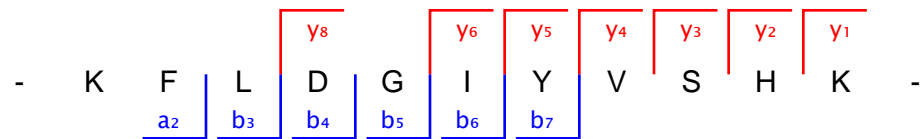

20140602\_QEp4\_FaHo\_SA\_RSC8\_0 9694 FTMS; HCD 131.56 592.05 TY1B-ML1;TY1B-MR2;TY1B-OR;TY1B-DR1;TY1B-PR2;TY1B-DR5;TY1B-PR1;TY1B-JR2;TY1B-OL;TY1B-LR4;TY1B-ML2;TY1B-PR3;TY1B-PL;TY1B-LR2;TY1B-

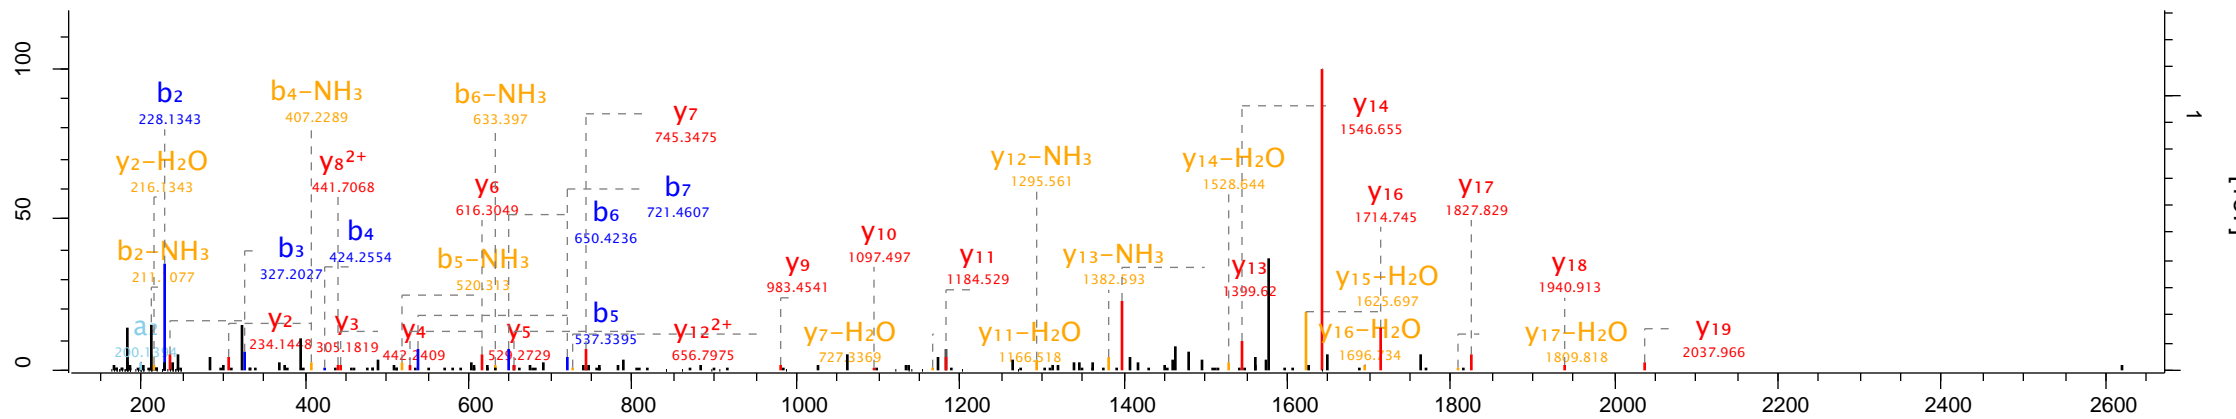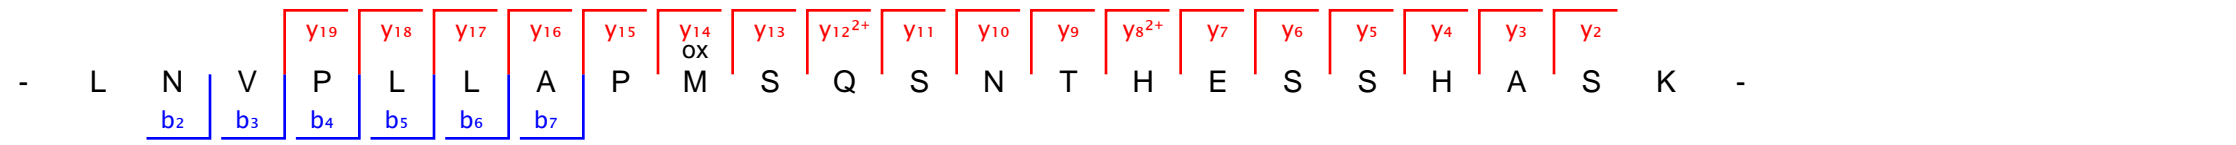

Raw file

Scan Method Score m/z Gene names

20140602\_QEp4\_FaHo\_SA\_SET1\_02 1451 FTMS; HCD 166.69 581.26 TY1B-ML1;TY1B-BR;TY1A-PR1;TY1A-A;TY1A-DR4;TY1B-H;TY1B-MR2;TY1B-OR;TY1B-DR1;TY1B-NL2;TY1B-PR2;TY1B-DR5;TY1B-PR1;TY1B-JR2

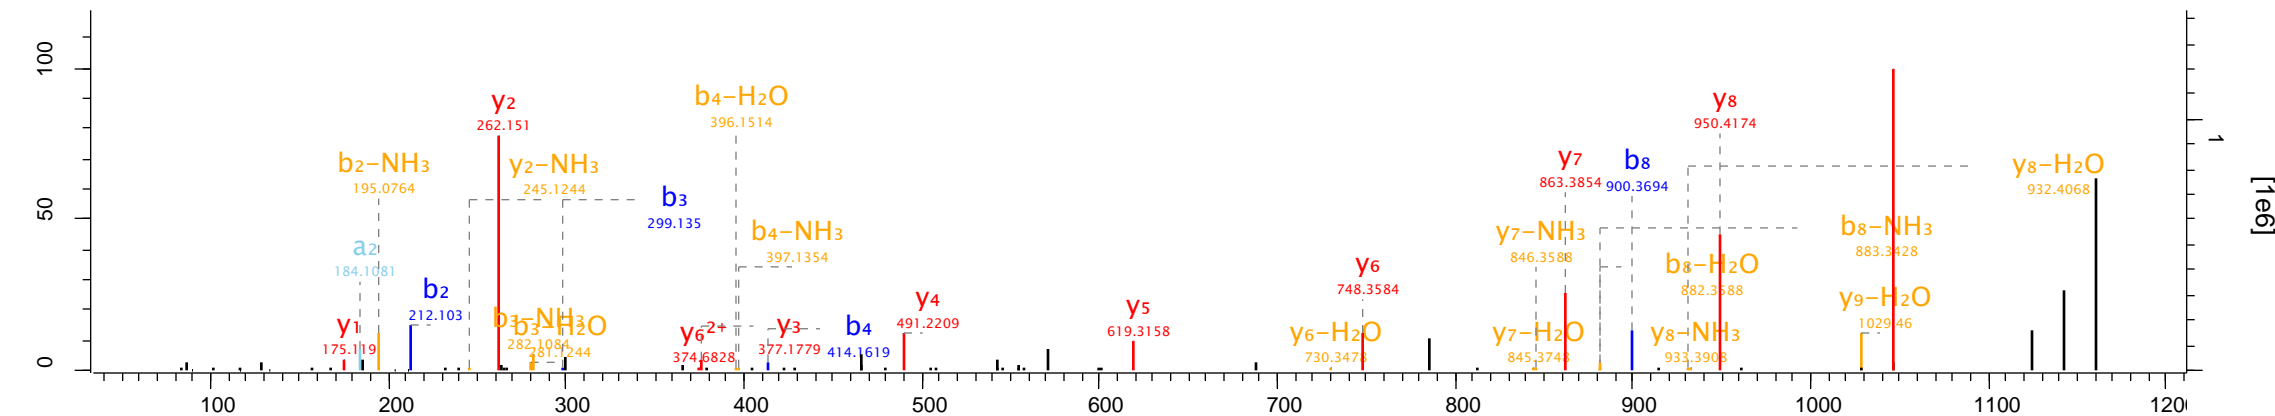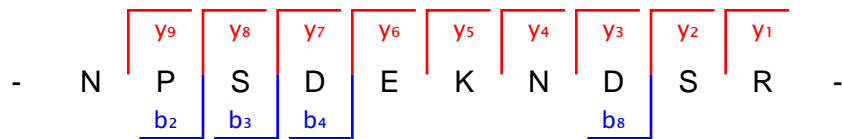

| Raw file                      | Scan | Method    | Score  | m/z    | Gene names |
|-------------------------------|------|-----------|--------|--------|------------|
| 20140602_QEp4_FaHo_SA_SET1_02 | 3044 | FTMS; HCD | 182.39 | 443.74 | RPS14B     |

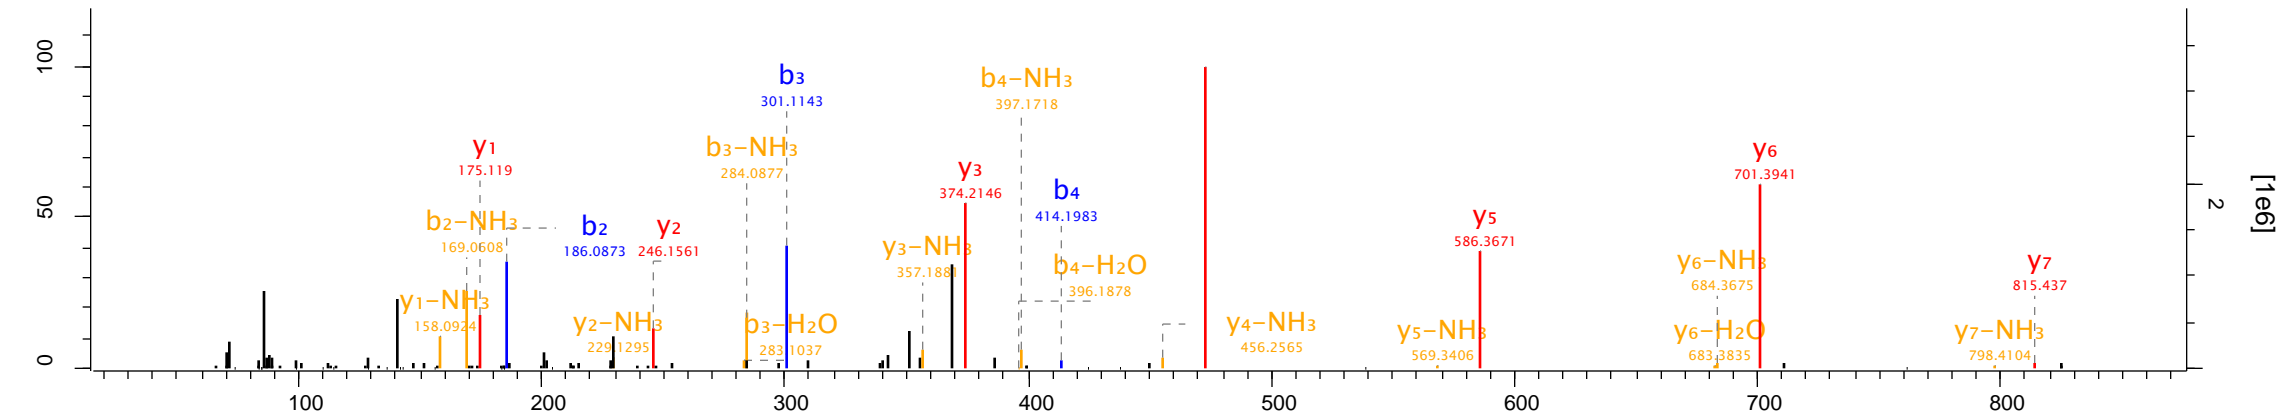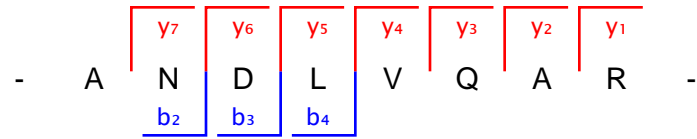

Raw file 20140602\_QEp4\_FaHo\_SA\_SET1\_02 Scan 3205 Method FTMS; HCD Score 130.98 m/z 512.78 Gene names RPS14B;RPS14A

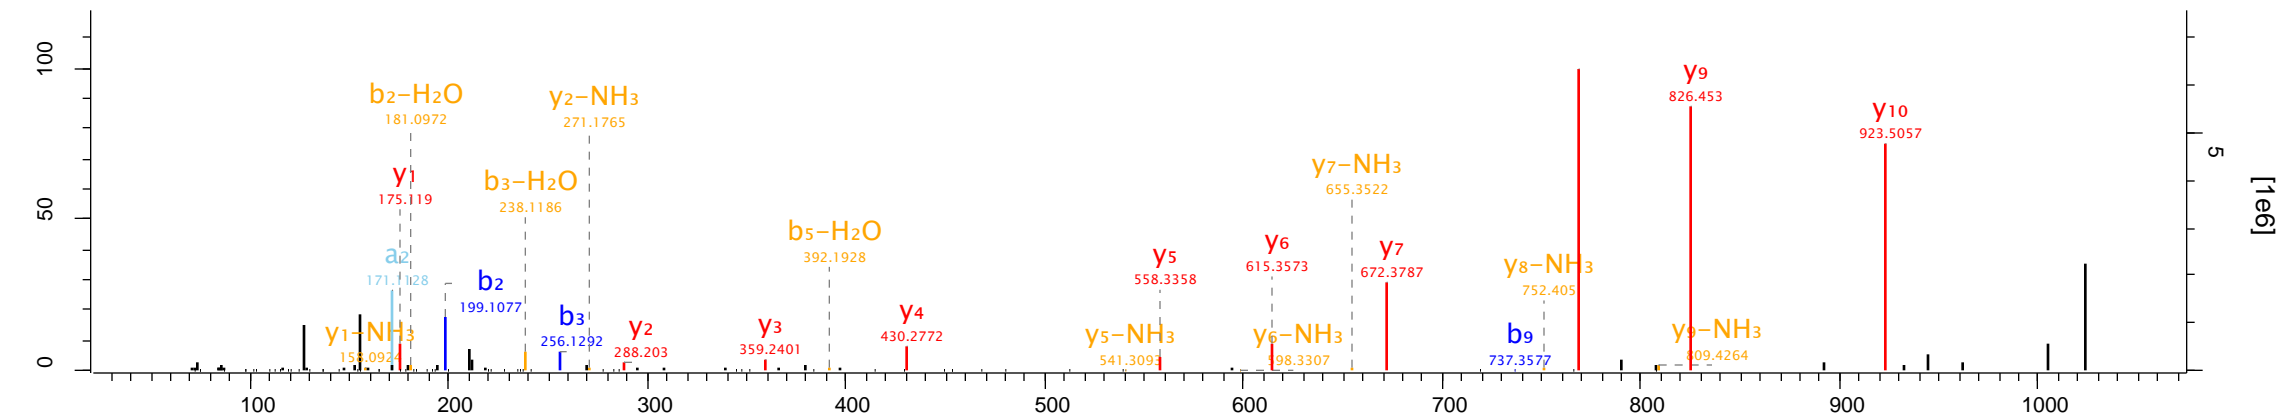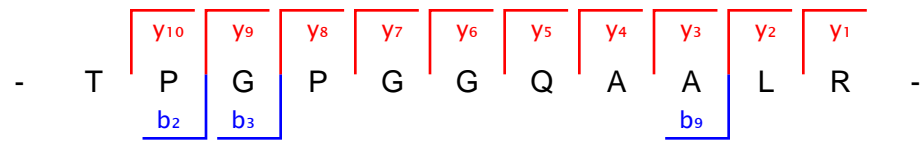



| Raw file                      | Scan | Method    | Score  | m/z    | Gene names |
|-------------------------------|------|-----------|--------|--------|------------|
| 20140602_QEp4_FaHo_SA_SET1_02 | 3255 | FTMS; HCD | 124.34 | 379.72 | RPS0B      |

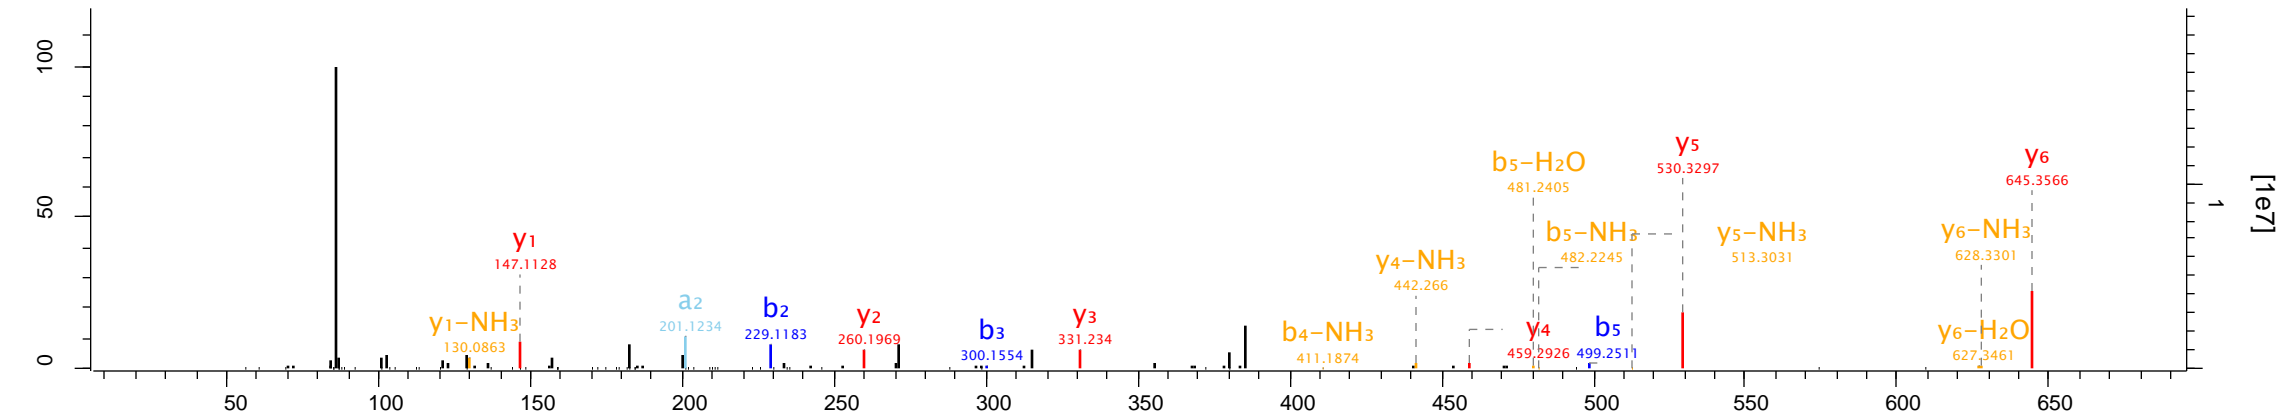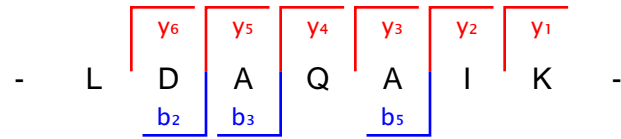

| Raw file                      | Scan | Method    | Score | m/z    | Gene names    |
|-------------------------------|------|-----------|-------|--------|---------------|
| 20140602_QEp4_FaHo_SA_SET1_02 | 3978 | FTMS; HCD | 60.76 | 396.21 | RPL14B;RPL14A |

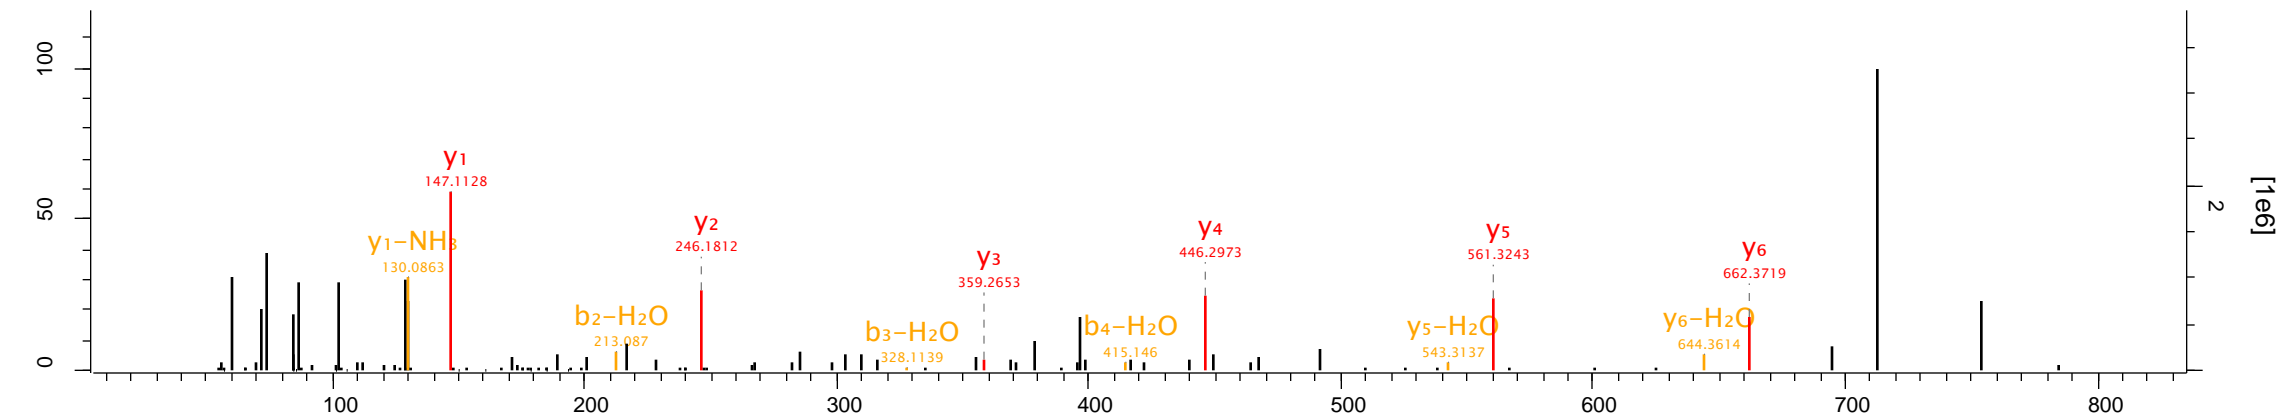

ac  
- S T D S I V K -

Fragmentation diagram showing the sequence S T D S I V K with brackets above the amino acids labeled y6, y5, y4, y3, y2, and y1, indicating the fragmentation sites.

Raw file 20140602\_QEp4\_FaHo\_SA\_SET1\_02 Scan 7348 Method FTMS; HCD Score 258.96 m/z 773.41 Gene names RPL36B;RPL36A

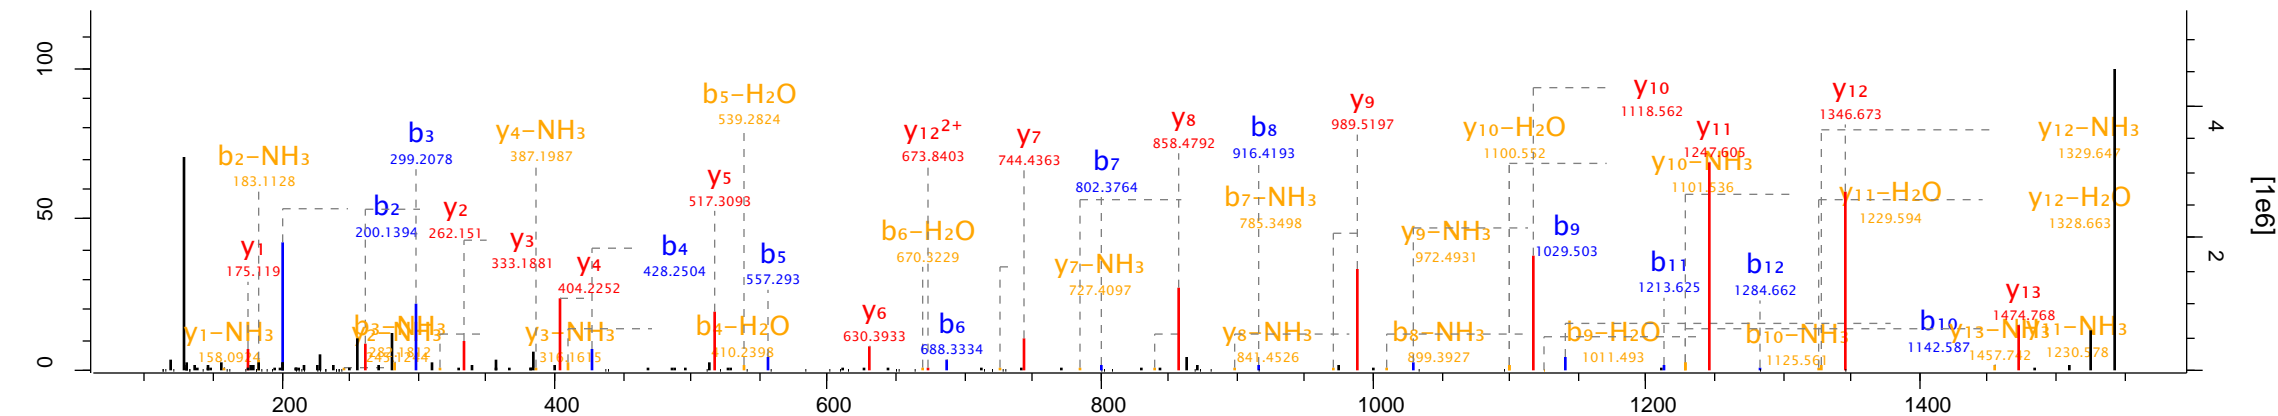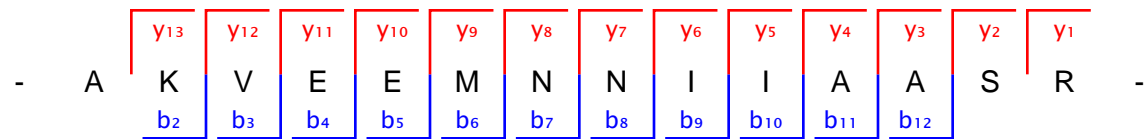

Raw file 20140602\_QEp4\_FaHo\_SA\_SET1\_02 Scan 7349 Method FTMS; HCD Score 189.57 m/z 650.84 Gene names RPL17A

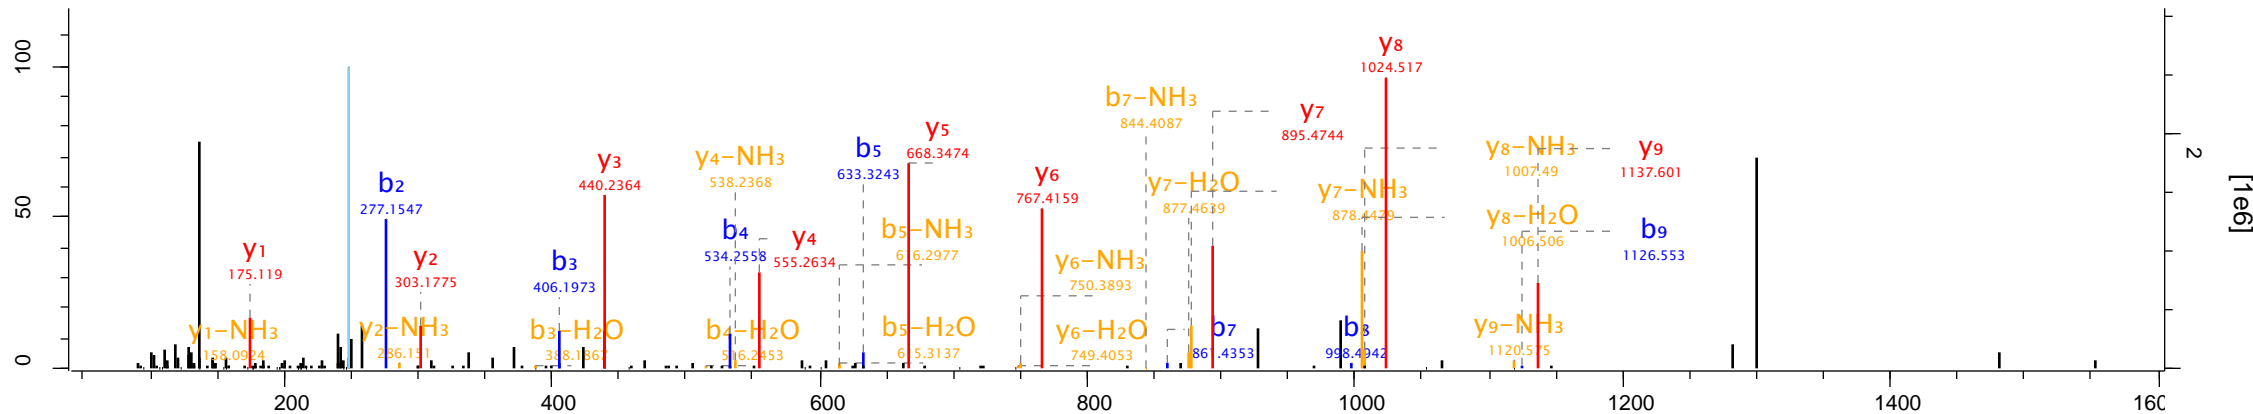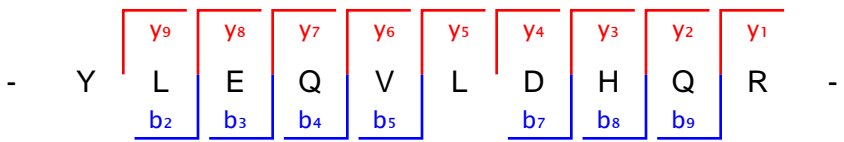

Raw file

Scan

Method

Score

m/z

Gene names

20140602\_QEp4\_FaHo\_SA\_SET3\_03

1597

FTMS; HCD

123.86

465.72

IMP2'

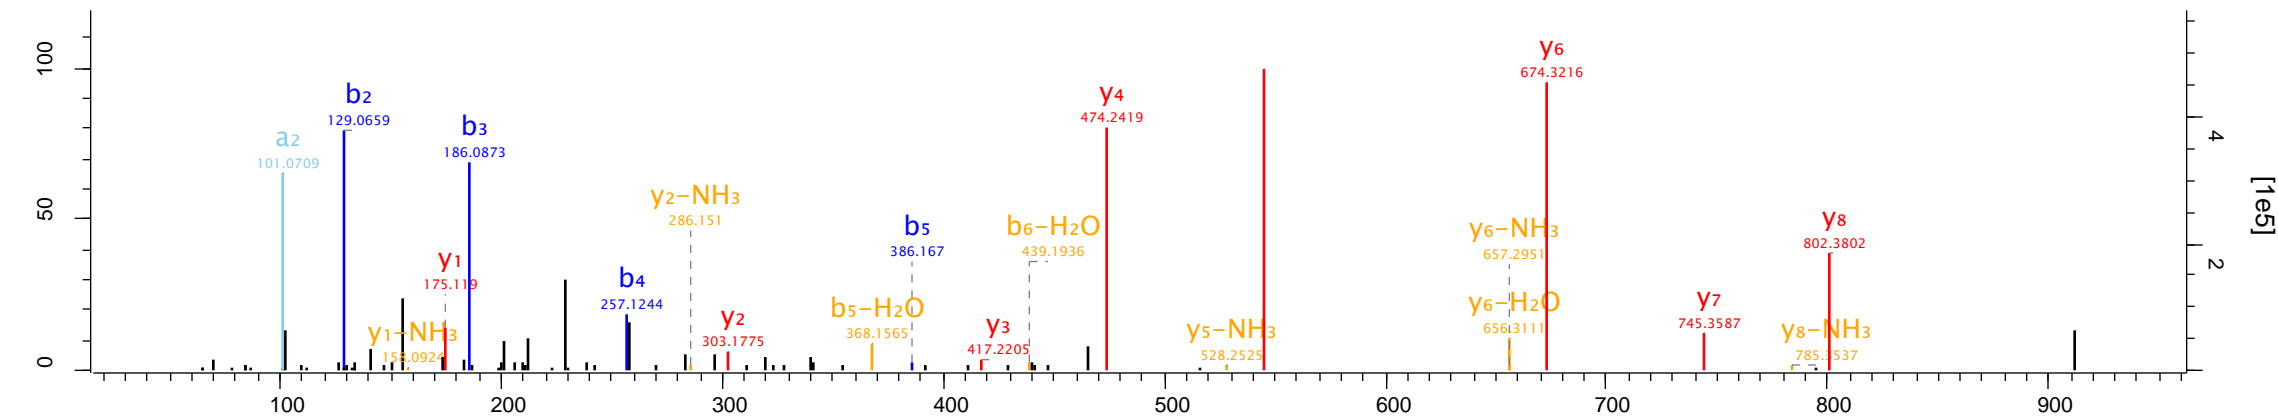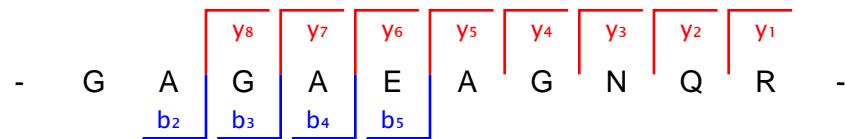

20140602\_QEp4\_Fal 26;FTMST 82;377.TY1B-ML1;TY1B-BR;TY1A-PR1;TY1A-A;TY1A-DR4;TY1B-H;TY1B-MR2;TY1B-OR;TY1B-DR1;TY1B-NL2;TY1B-PR2;TY1B-DR5;TY1B-PR1;TY1B-JR2;TY1B-NL1;TY1A-PL;TY1A-LR2;TY

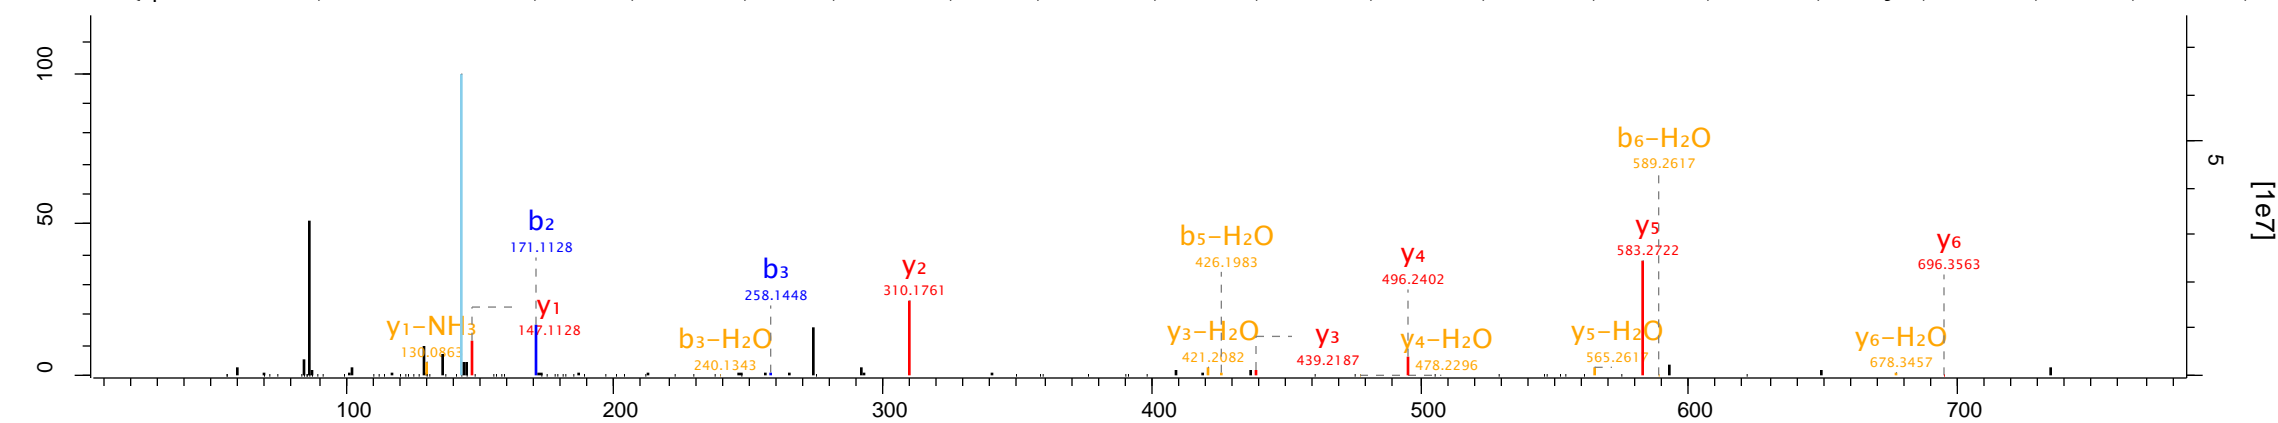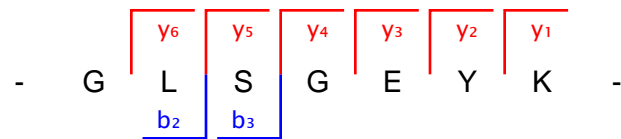

20140602\_QEp4\_FaHo\_183 (FTMS) 2143.1520; TY1B-ML1;TY1B-BR;TY1A-PR1;TY1A-A;TY1A-DR4;TY1B-H;TY1B-MR2;TY1B-OR;TY1B-DR1;TY1B-NL2;TY1B-PR2;TY1B-DR5;TY1B-PR1;TY1B-JR2;TY1A-PL;TY1A-LR2;TY1A-

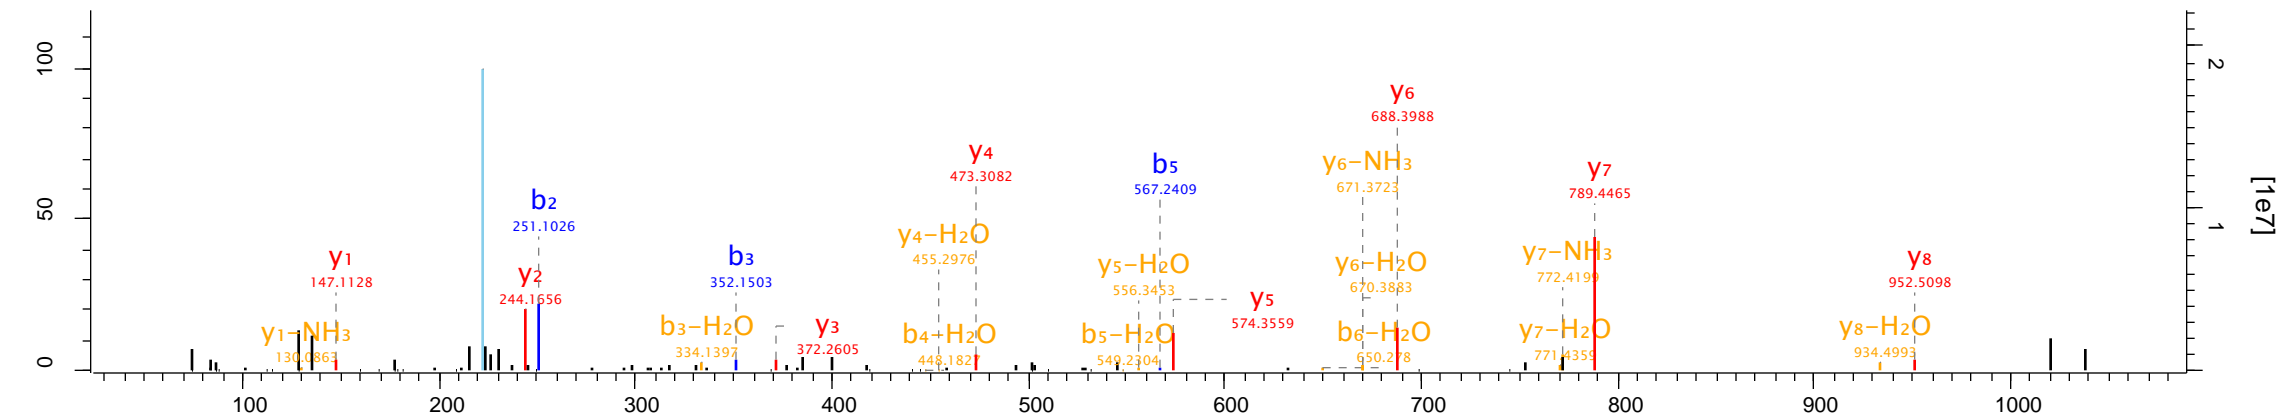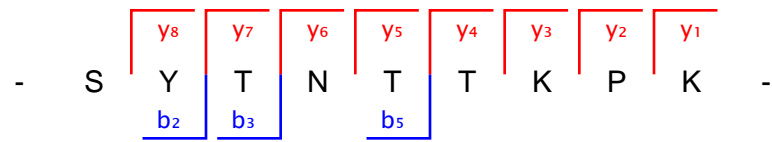

| Raw file                      | Scan | Method    | Score | m/z    | Gene names |
|-------------------------------|------|-----------|-------|--------|------------|
| 20140602_QEp4_FaHo_SA_SHG1_03 | 3005 | FTMS; HCD | 87.09 | 784.38 | SUR4       |

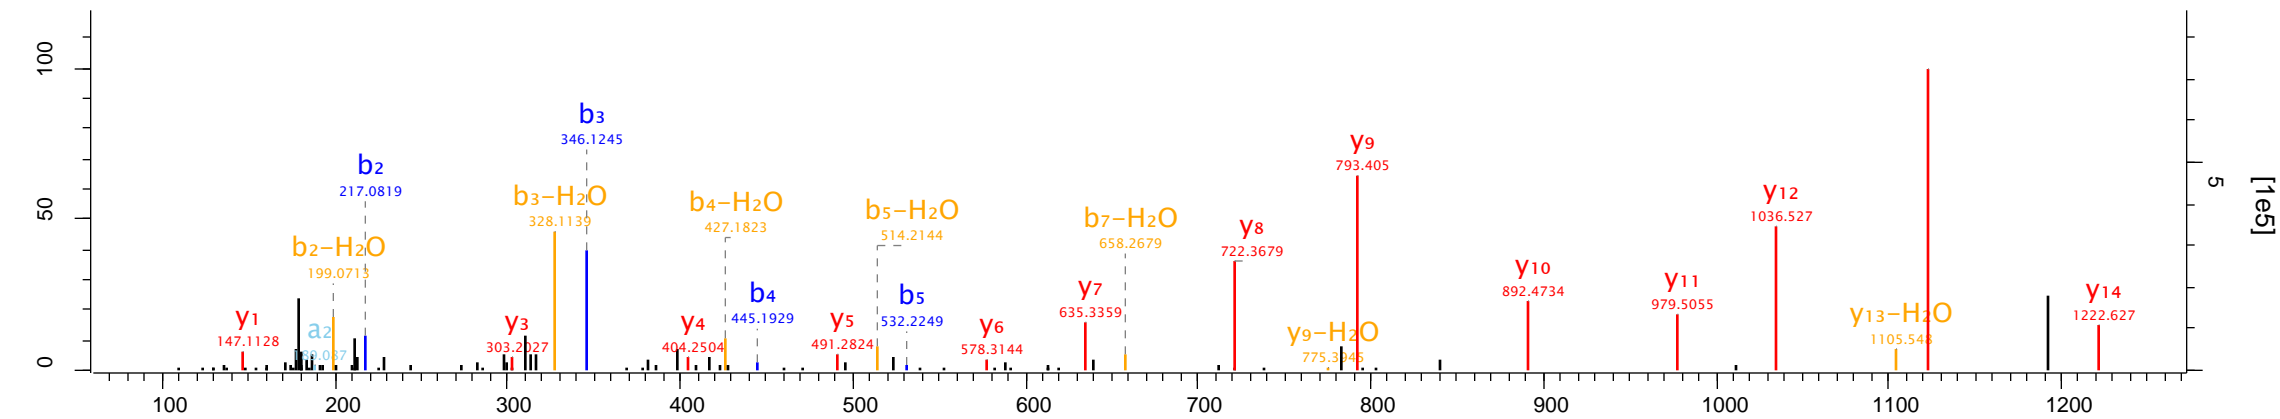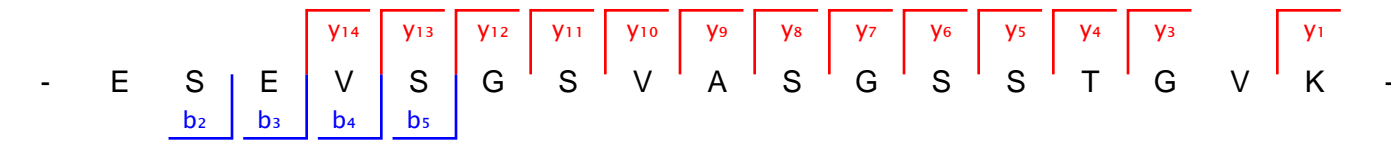



Raw file Scan Method Score m/z Gene names

20140602\_QEp4\_FaHo\_SA\_SIR2\_01 4785 FTMS; HCD 97.96 512.28 MES1

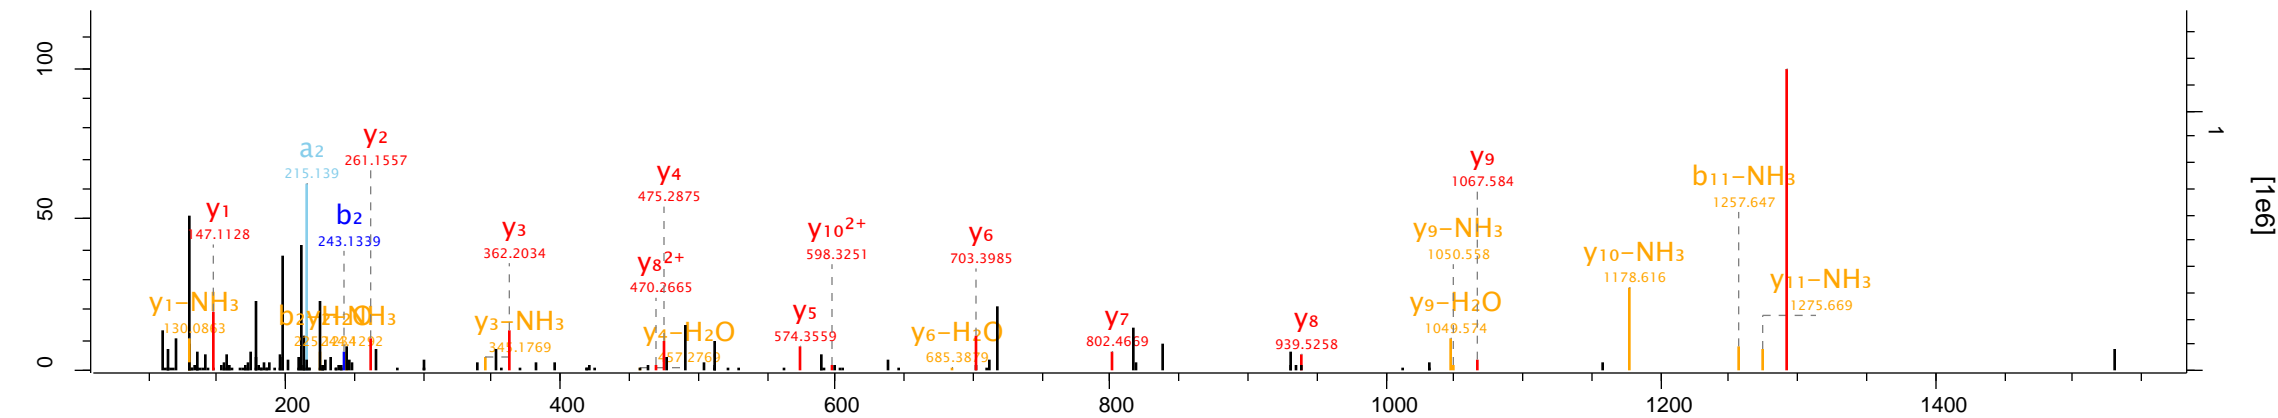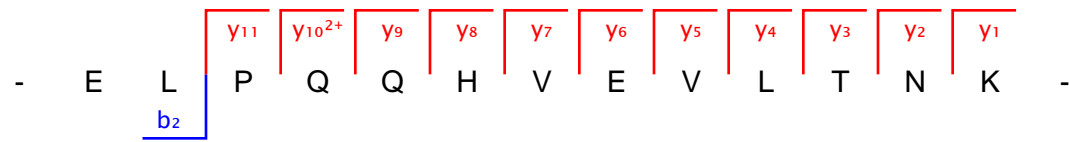

Raw file 20140602\_QEp4\_FaHo\_SA\_SIR2\_01 Scan 5927 Method FTMS; HCD Score 156.17 m/z 753.88 Gene names RPL4B;RPL4A

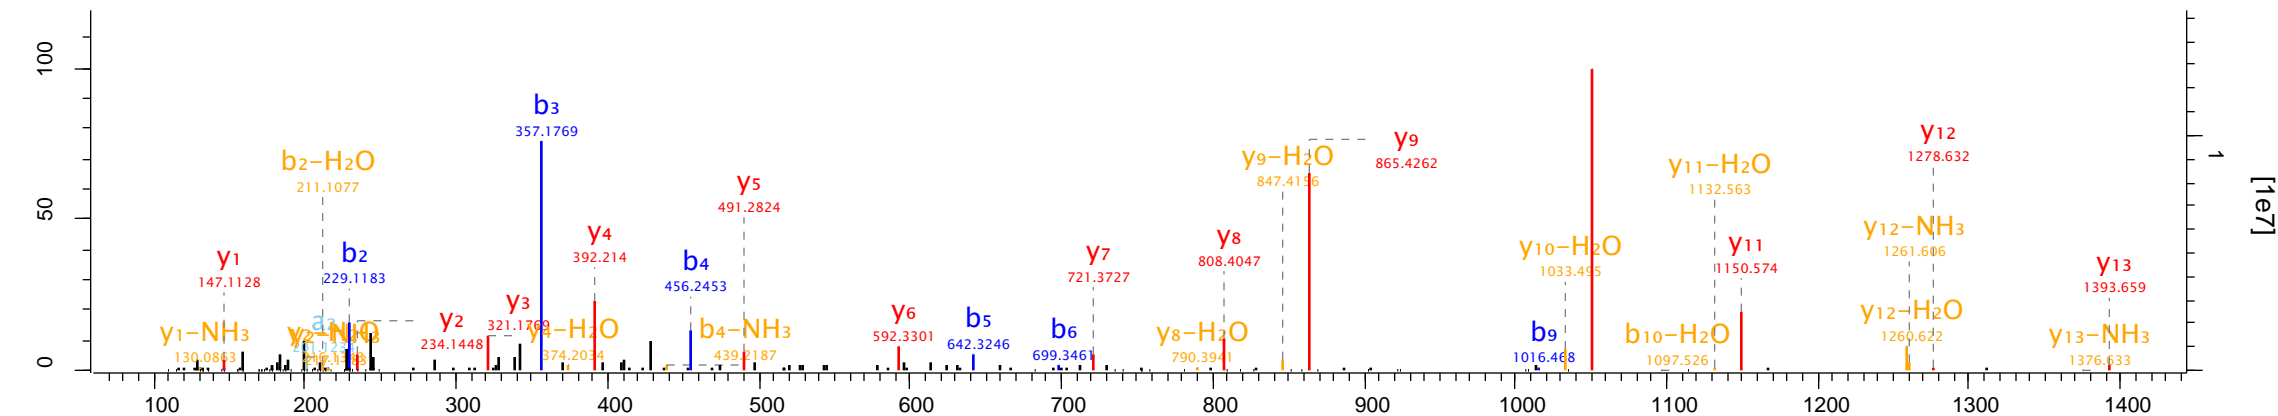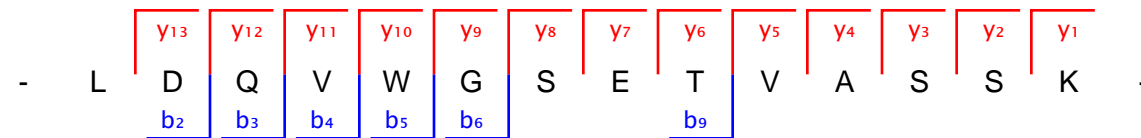

Raw file

Scan Method Score m/z Gene names

20140602\_QEp4\_FaHo\_SA\_SIR2\_01

5939 FTMS; HCD 74.46 345.54 PBI2

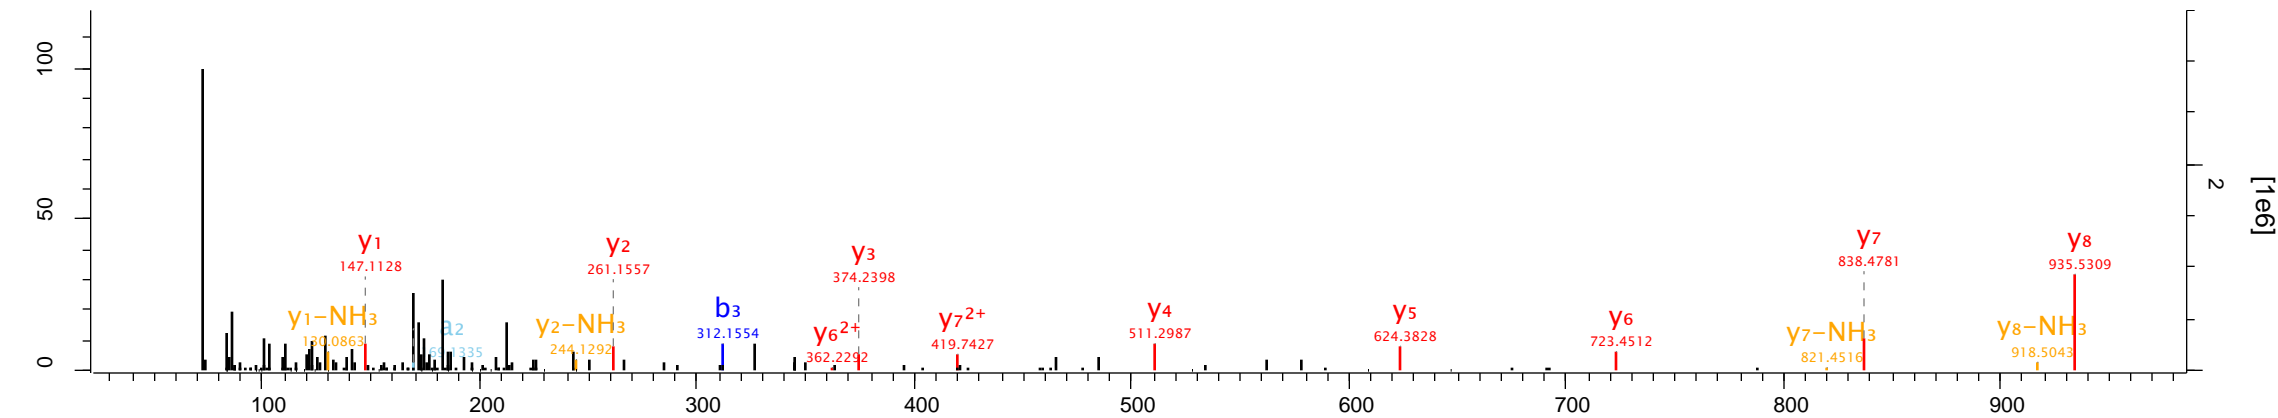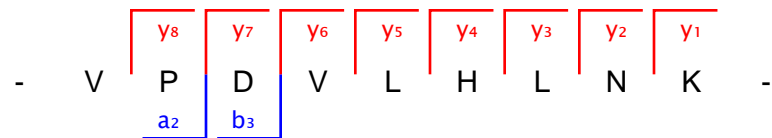

Raw file

Scan

Method

Score

m/z

Gene names

20140602\_QEp4\_FaHo\_SA\_SIR2\_01

7038

FTMS; HCD

70.84

703.36

THR1

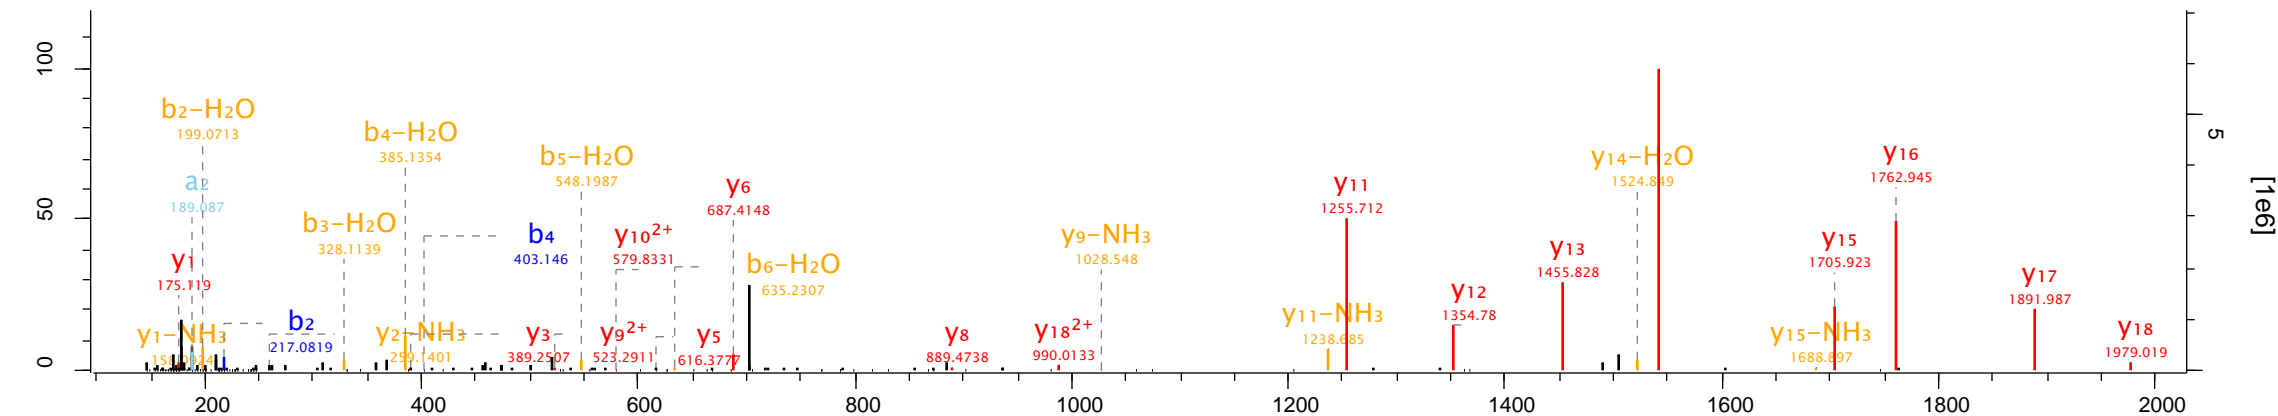

- E S E G Y S T V P L R S D A N L I T R -

b<sub>2</sub> b<sub>4</sub>

Raw file

Scan Method Score m/z Gene names

20140602\_QEp4\_FaHo\_SA\_SIR2\_01

7470 FTMS; HCD 94.01 521.65 DLD3

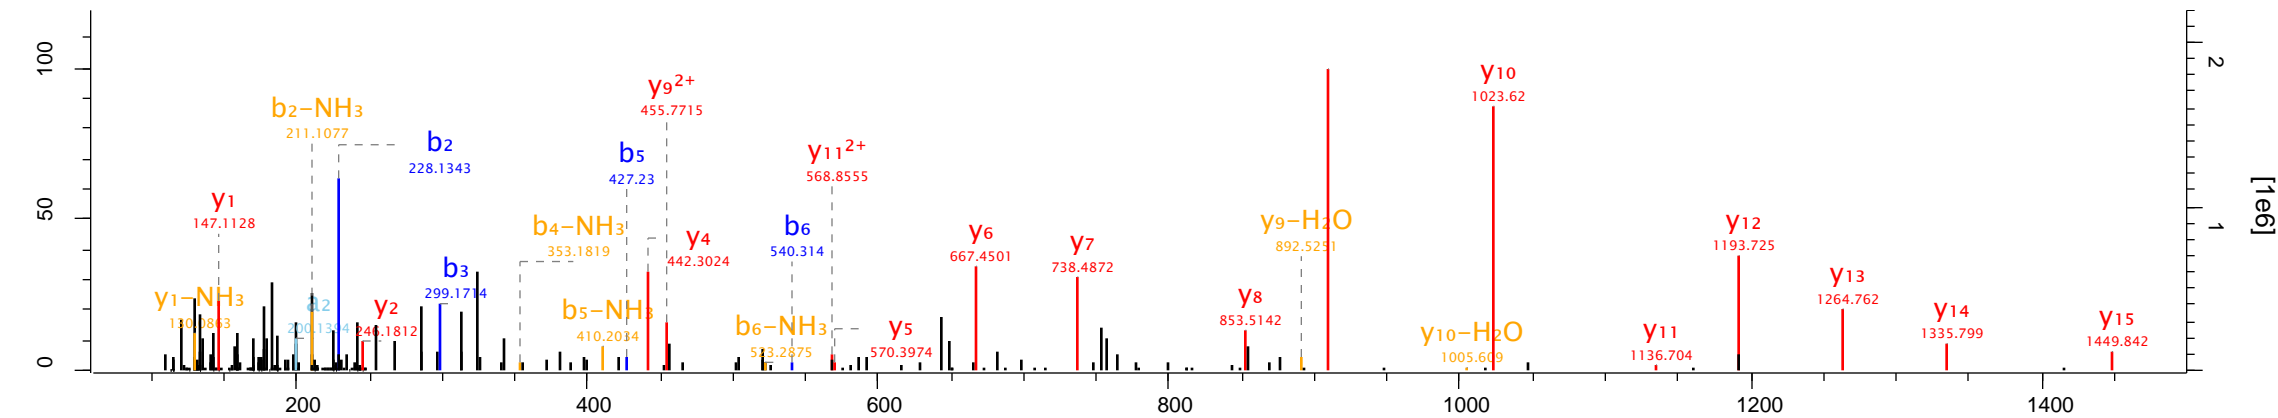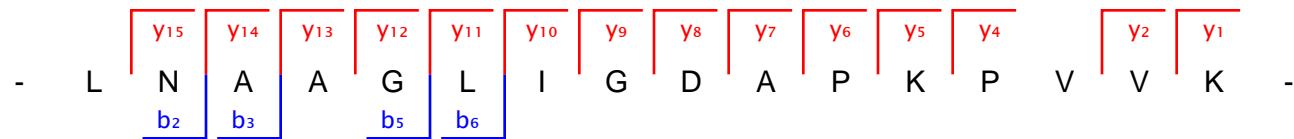

| Raw file                      | Scan | Method    | Score  | m/z   | Gene names  |
|-------------------------------|------|-----------|--------|-------|-------------|
| 20140602_QEp4_FaHo_SA_SIR2_01 | 8133 | FTMS; HCD | 120.84 | 737.9 | RPL4B;RPL4A |

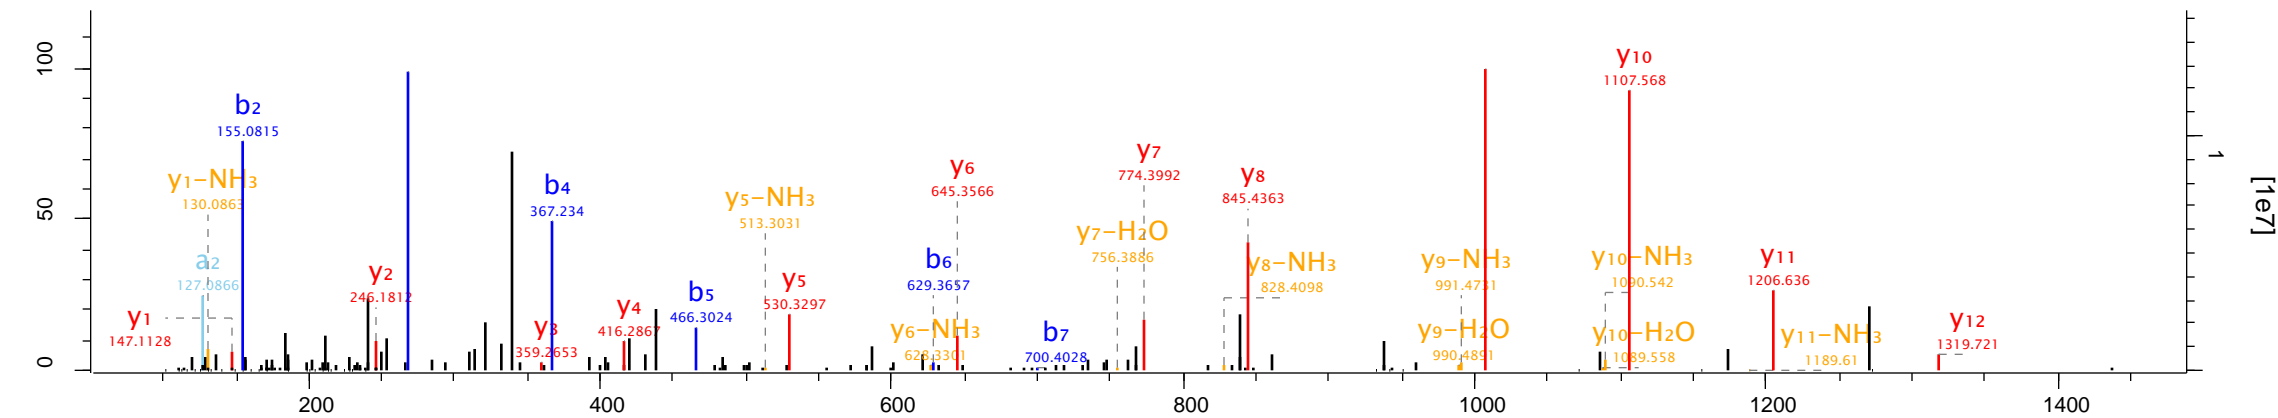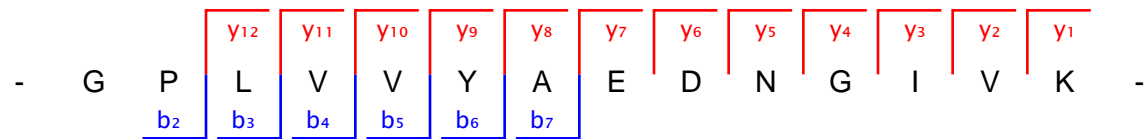

Raw file Scan Method Score m/z Gene names  
 20140602\_QEp4\_FaHo\_SA\_SIR2\_01 8275 FTMS; HCD 237.89 777.93 RPL7A;RPL7B

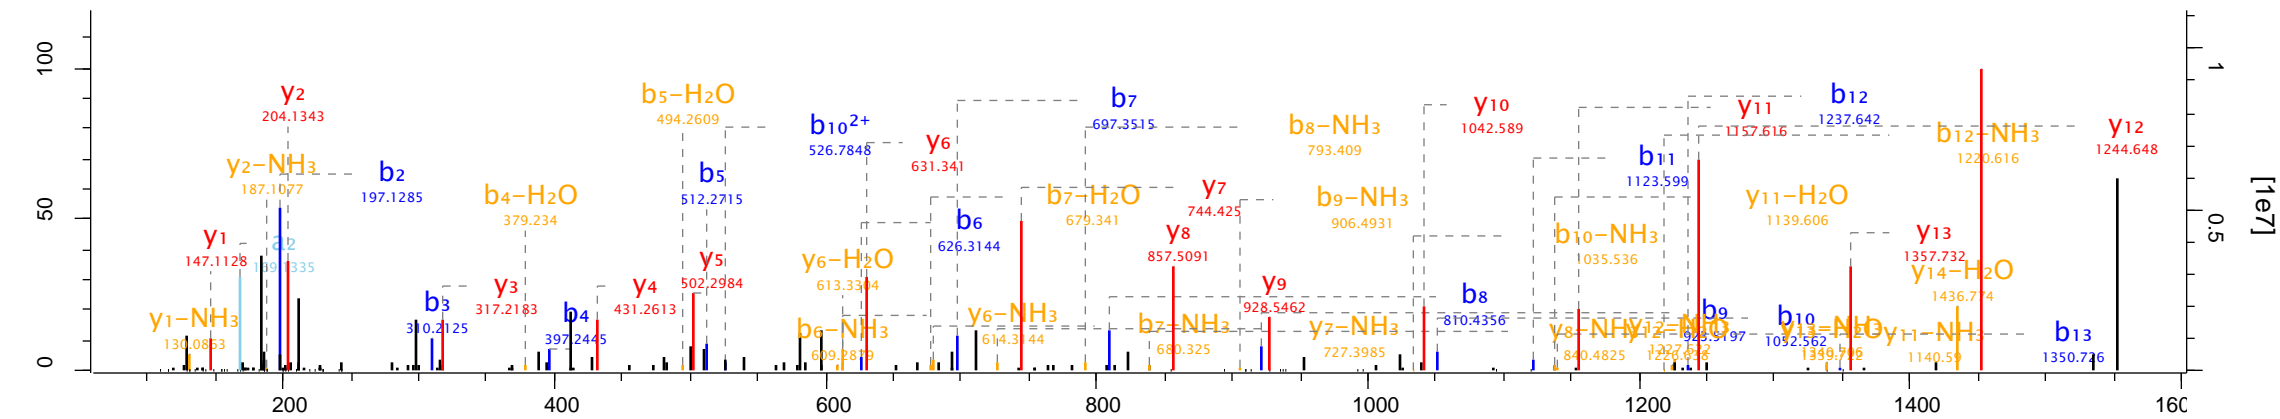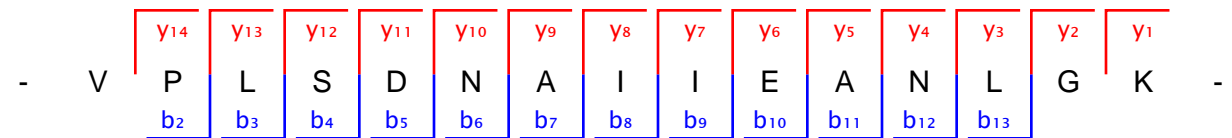

Raw file

20140602\_QEp4\_FaHo\_SA\_SIR2\_01

Scan Method Score m/z Gene names

10008 FTMS; HCD 129.35 1018.83 APA1

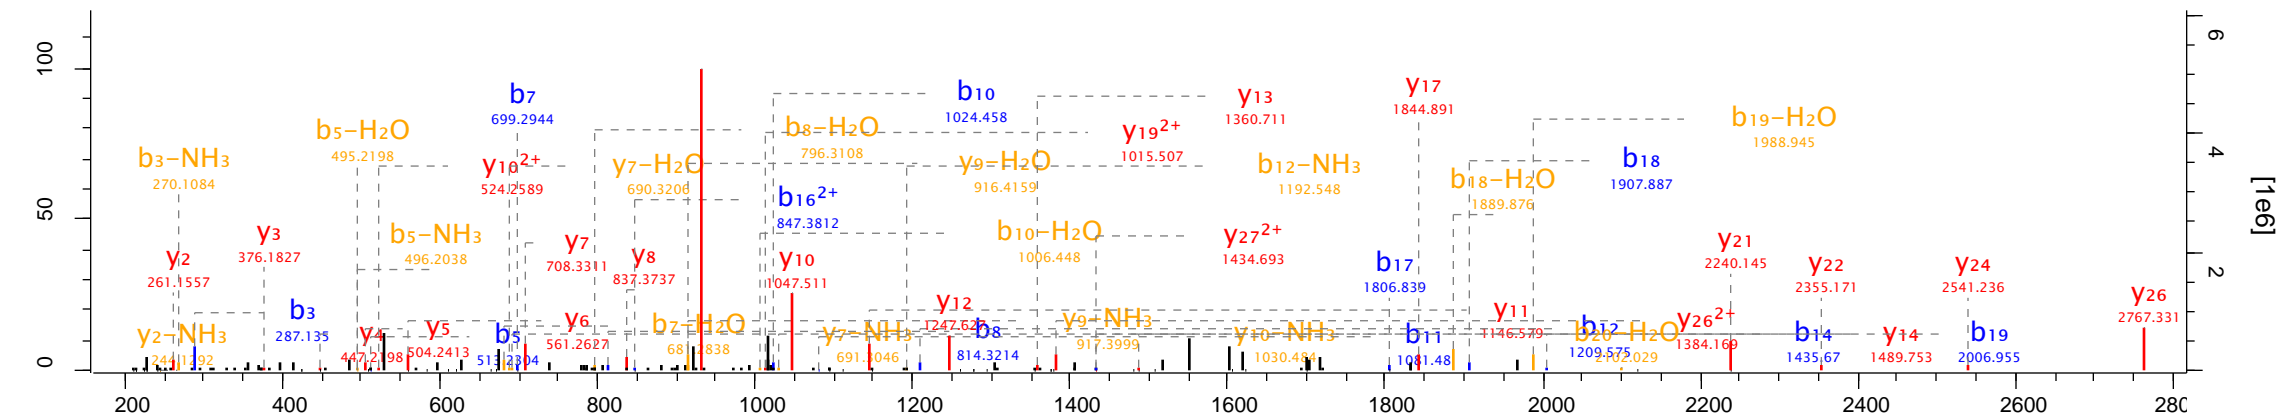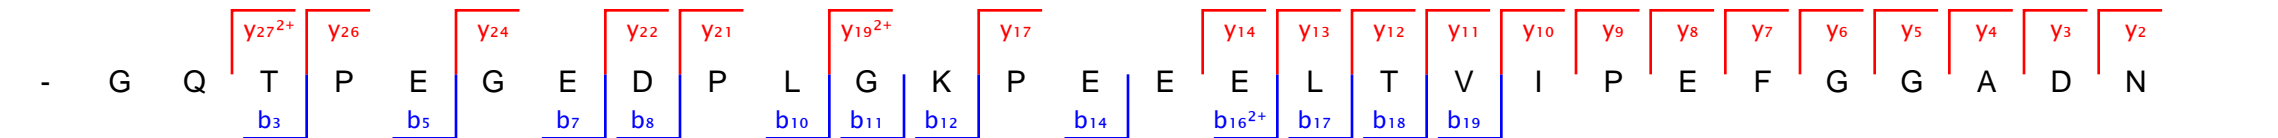



Raw file Scan Method Score m/z Gene names

20140602\_QEp4\_FaHo\_SA\_SIR2\_01

10034 FTMS; HCD 132.84 553.65 PGM2

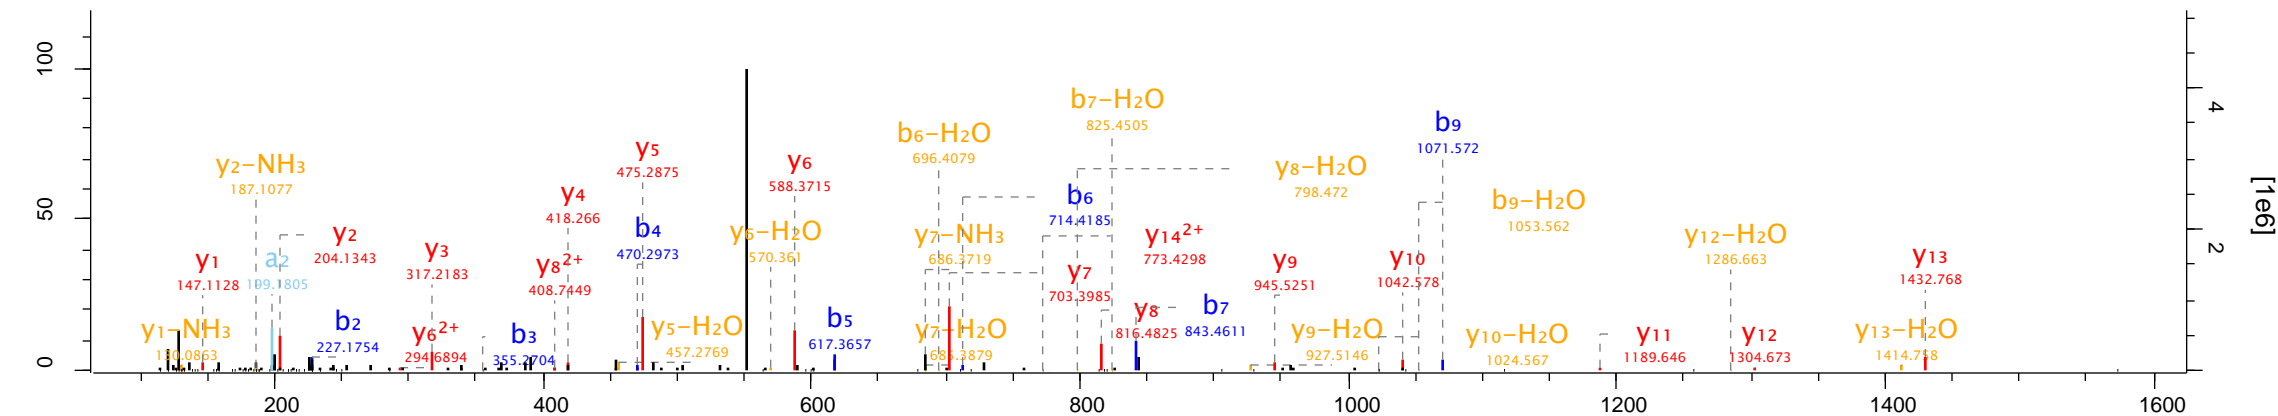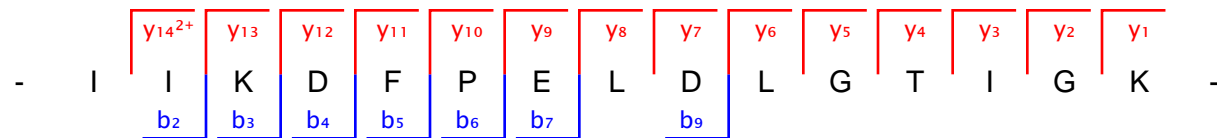

Raw file Scan Method Score m/z Gene names

20140602\_QEp4\_FaHo\_SA\_SIR2\_01 10081 FTMS; HCD 105.79 731.36 TPM2

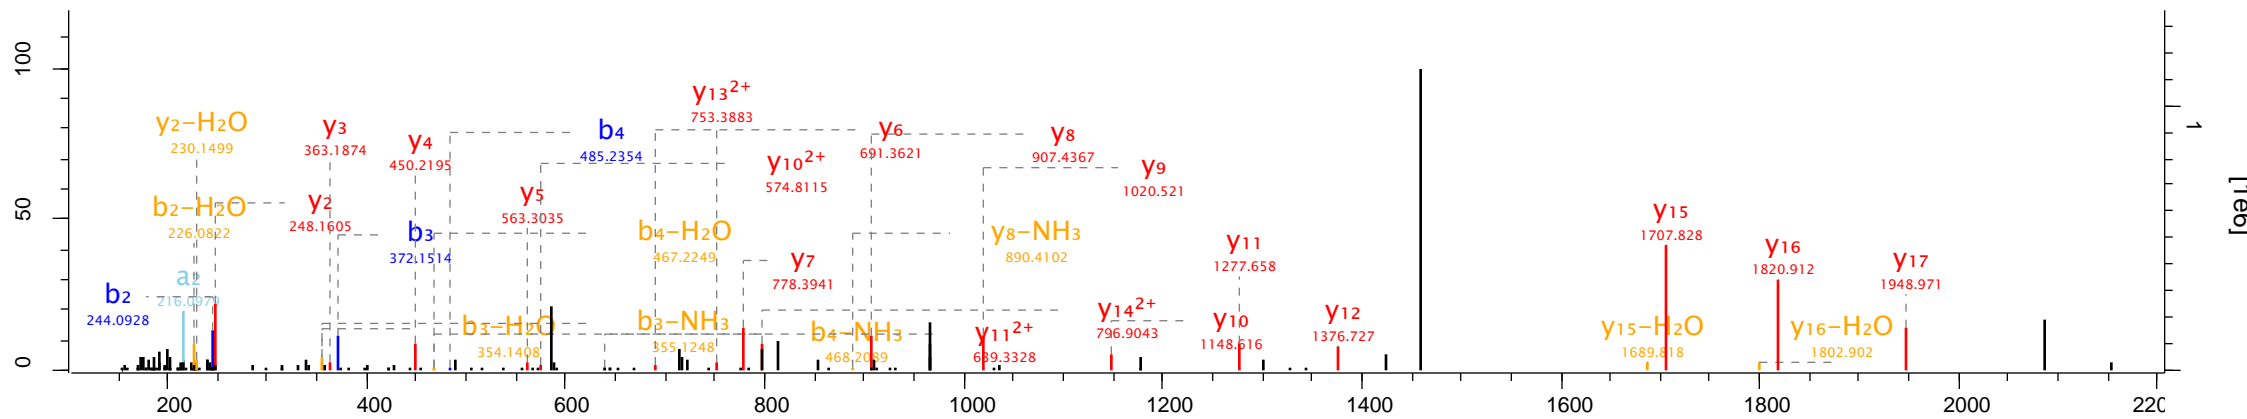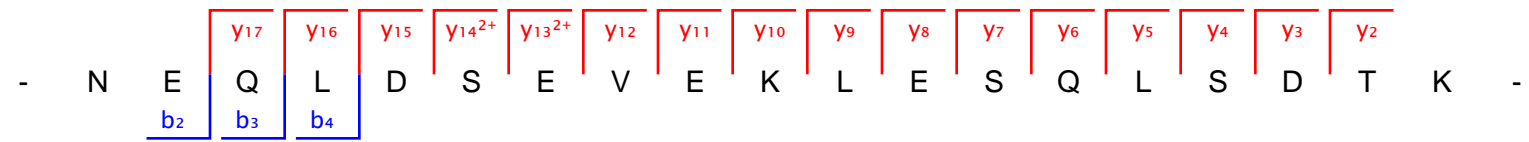

Raw file Scan Method Score m/z Gene names

20140602\_QEp4\_FaHo\_SA\_SIR2\_02 3479 FTMS; HCD 163.65 571.28 PFY1

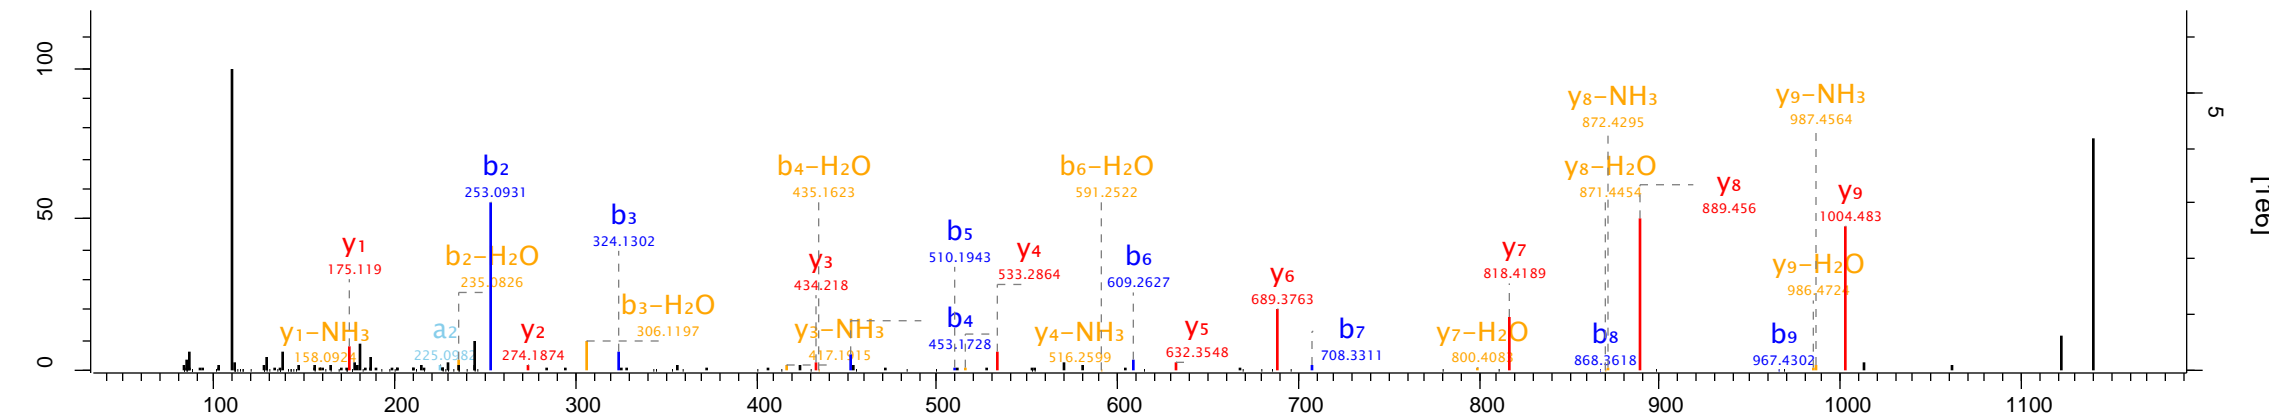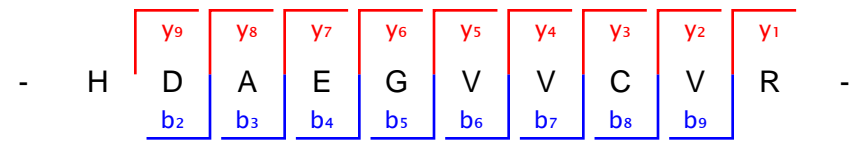

| Raw file                      | Scan | Method    | Score  | m/z    | Gene names    |
|-------------------------------|------|-----------|--------|--------|---------------|
| 20140602_QEp4_FaHo_SA_SIR2_03 | 4500 | FTMS; HCD | 101.97 | 471.77 | RPS26A;RPS26B |

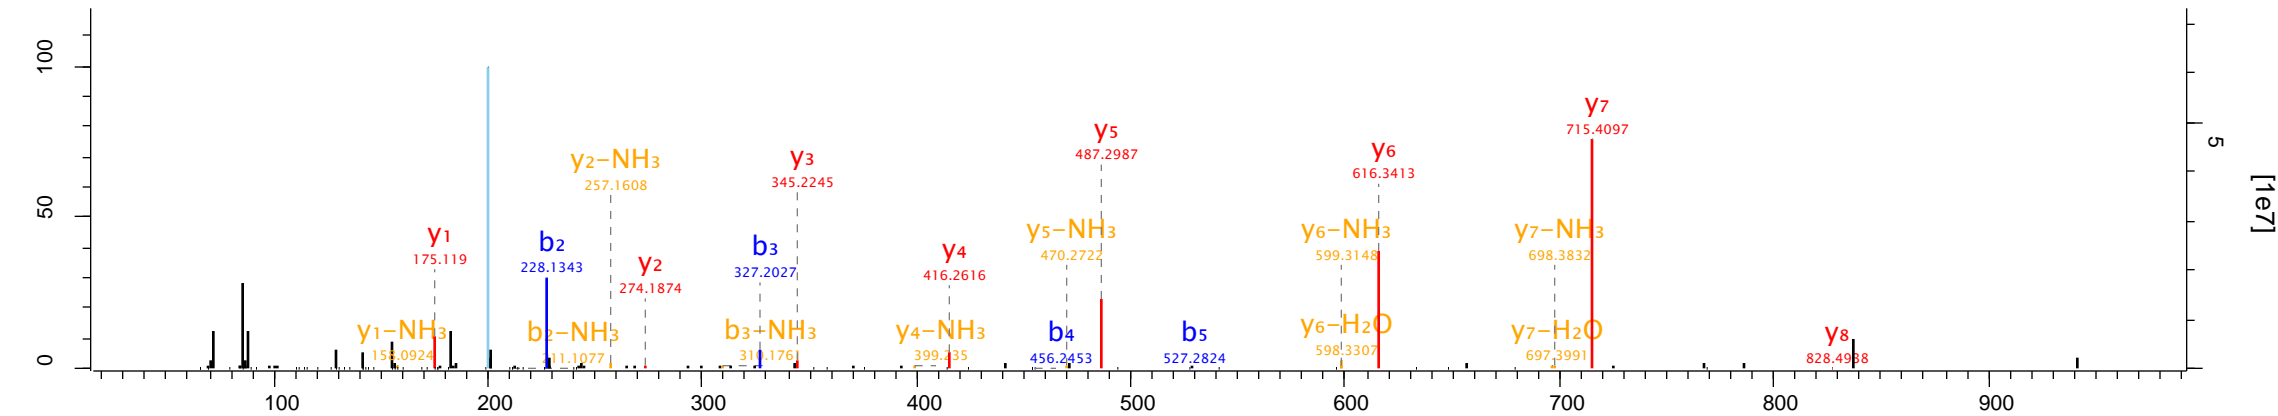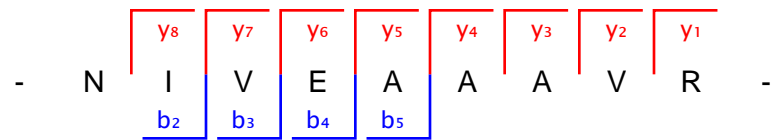

Raw file Scan Method Score m/z Gene names

20140602\_QEp4\_FaHo\_SA\_SIR2\_03 5025 FTMS; HCD 106.32 691.83 TRX1

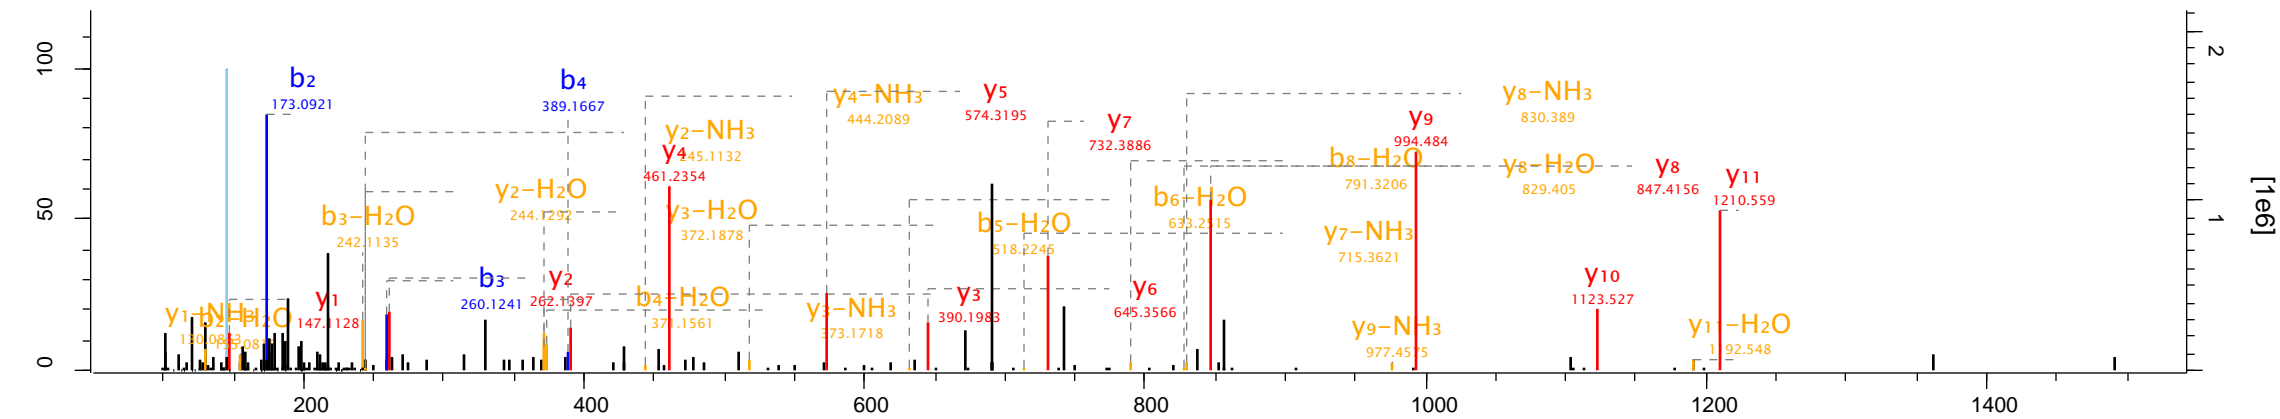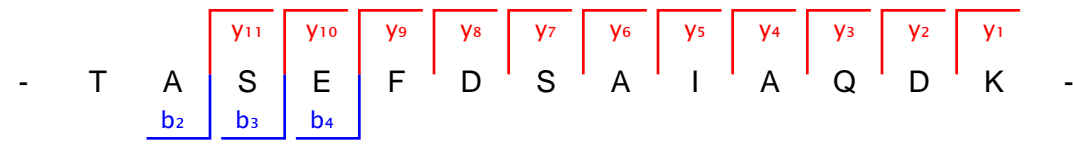

| Raw file                      | Scan | Method    | Score | m/z    | Gene names  |
|-------------------------------|------|-----------|-------|--------|-------------|
| 20140602_QEp4_FaHo_SA_SIR2_03 | 6518 | FTMS; HCD | 97.73 | 529.32 | YPT31;YPT32 |

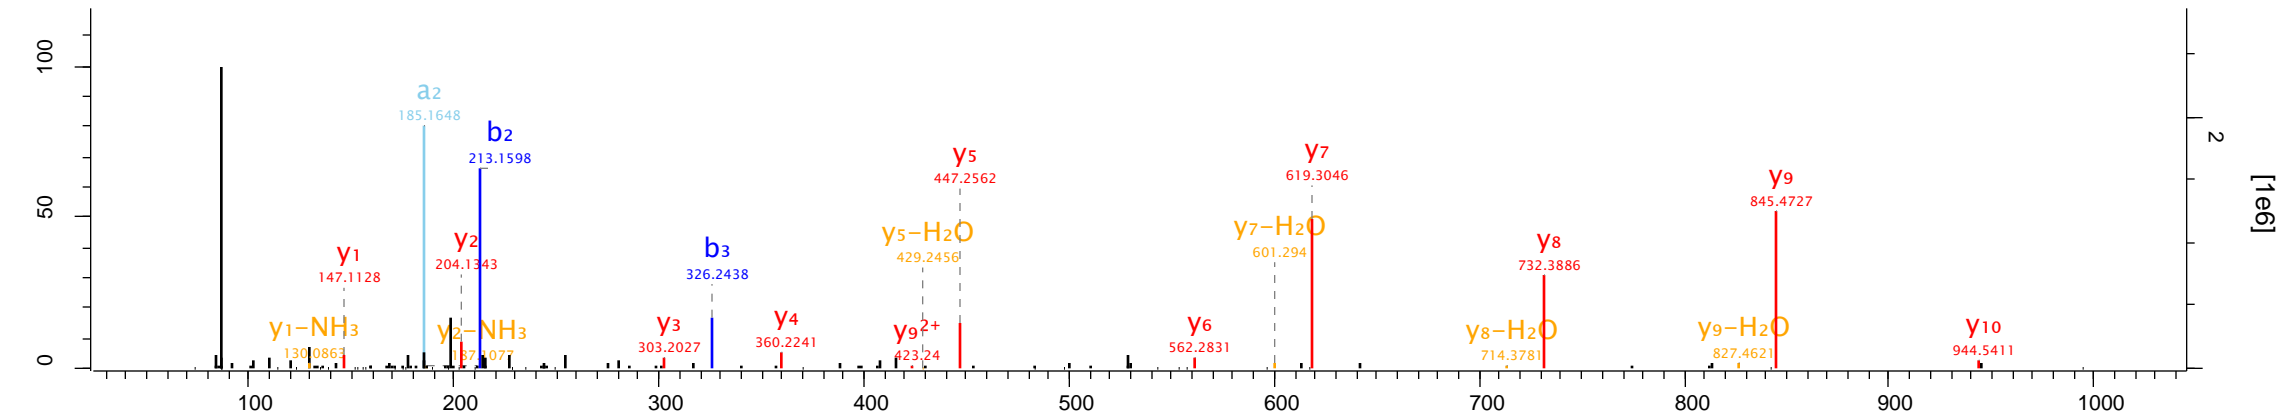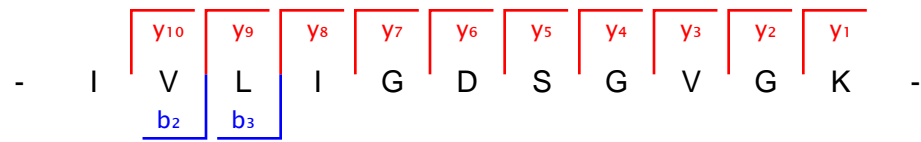

Raw file Scan Method Score m/z Gene names  
 20140602\_QEp4\_FaHo\_SA\_SIR2\_03 7214 FTMS; HCD 135.8 816.9 ARF1;ARF2

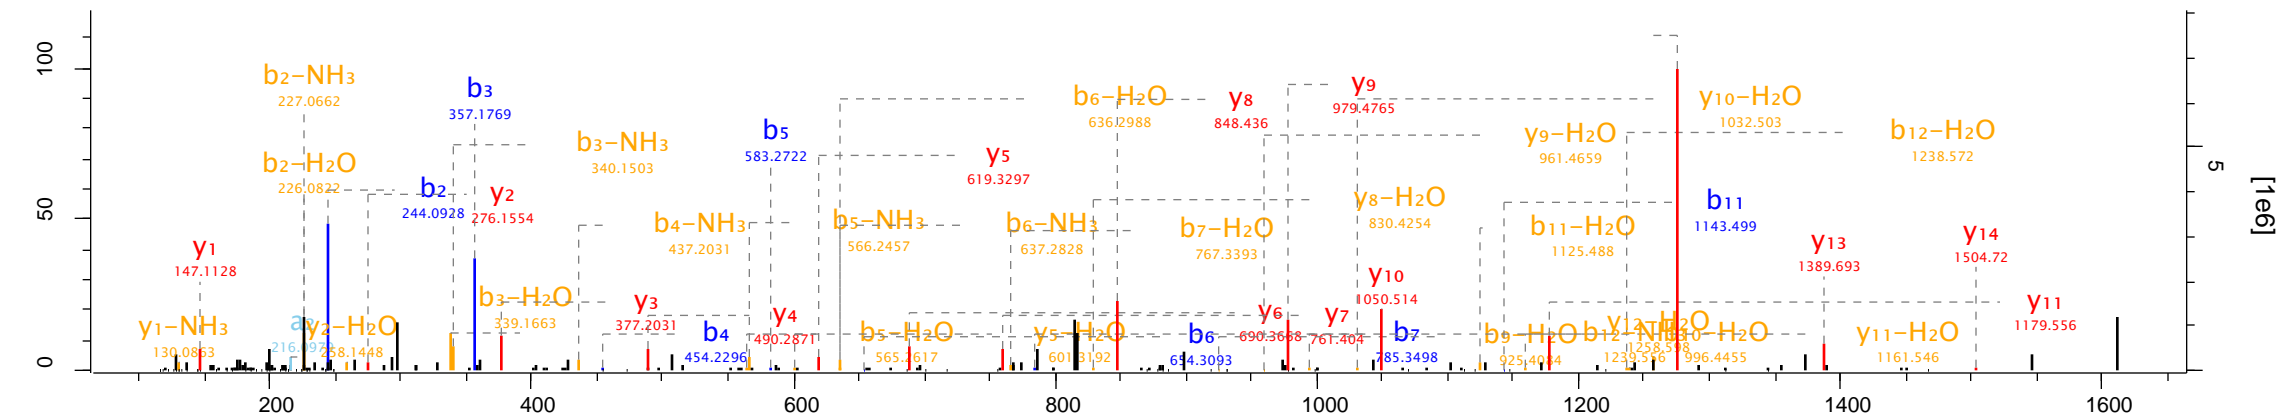

- Q D L P E A M S A A E I T E K -

Fragmentation mapping:

- Red boxes (y ions): y14 (D), y13 (L), y12 (P), y11 (E), y10 (A), y9 (M), y8 (S), y7 (A), y6 (A), y5 (E), y4 (I), y3 (T), y2 (E), y1 (K)
- Blue boxes (b ions): b2 (D), b3 (L), b4 (P), b5 (E), b6 (A), b7 (M), b11 (E)

Raw file Scan Method Score m/z Gene names

20140602\_QEp4\_FaHo\_SA\_SIR2\_03 7535 FTMS; HCD 50.12 662.4 GUS1

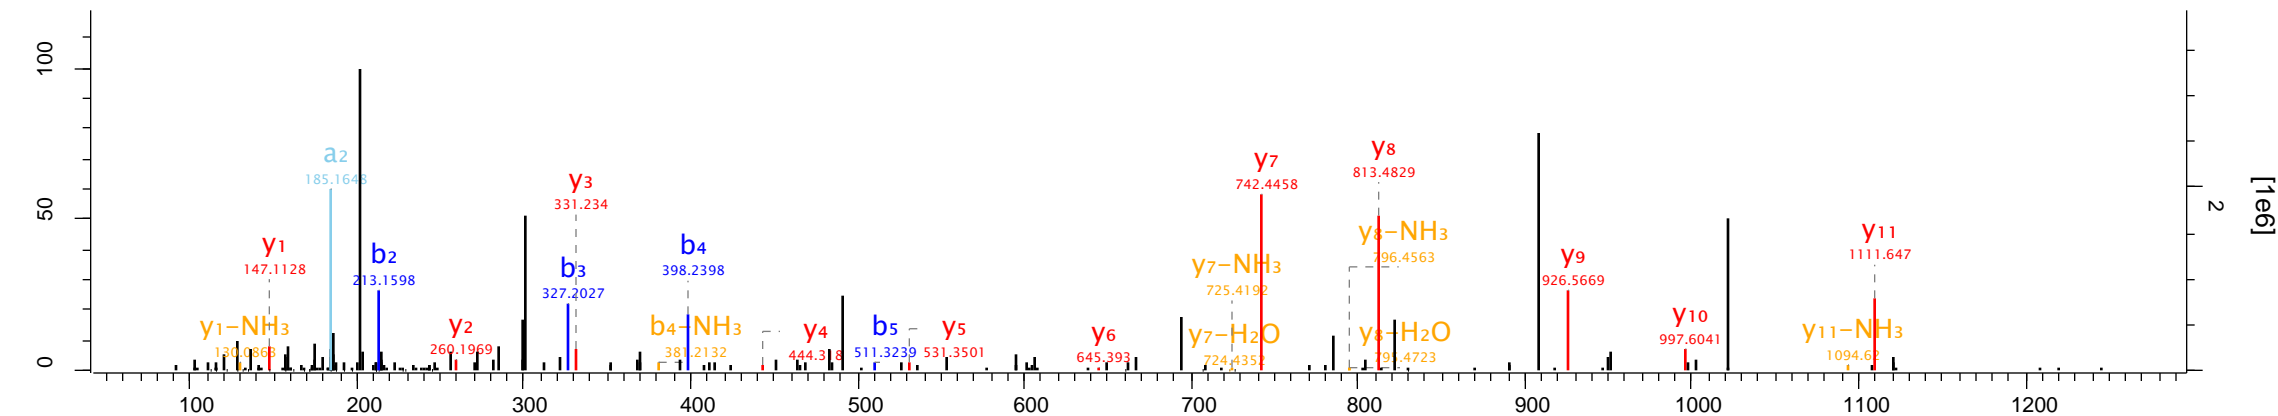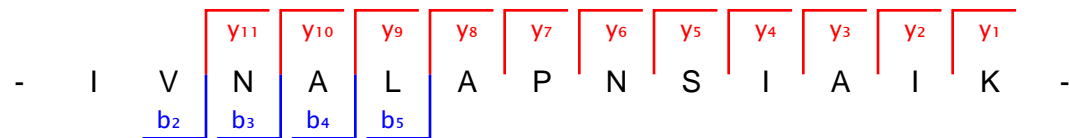



Raw file Scan Method Score m/z Gene names

20140602\_QEp4\_FaHo\_SA\_SIR2\_03 8173 FTMS; HCD 108.9 594.35 ARG4

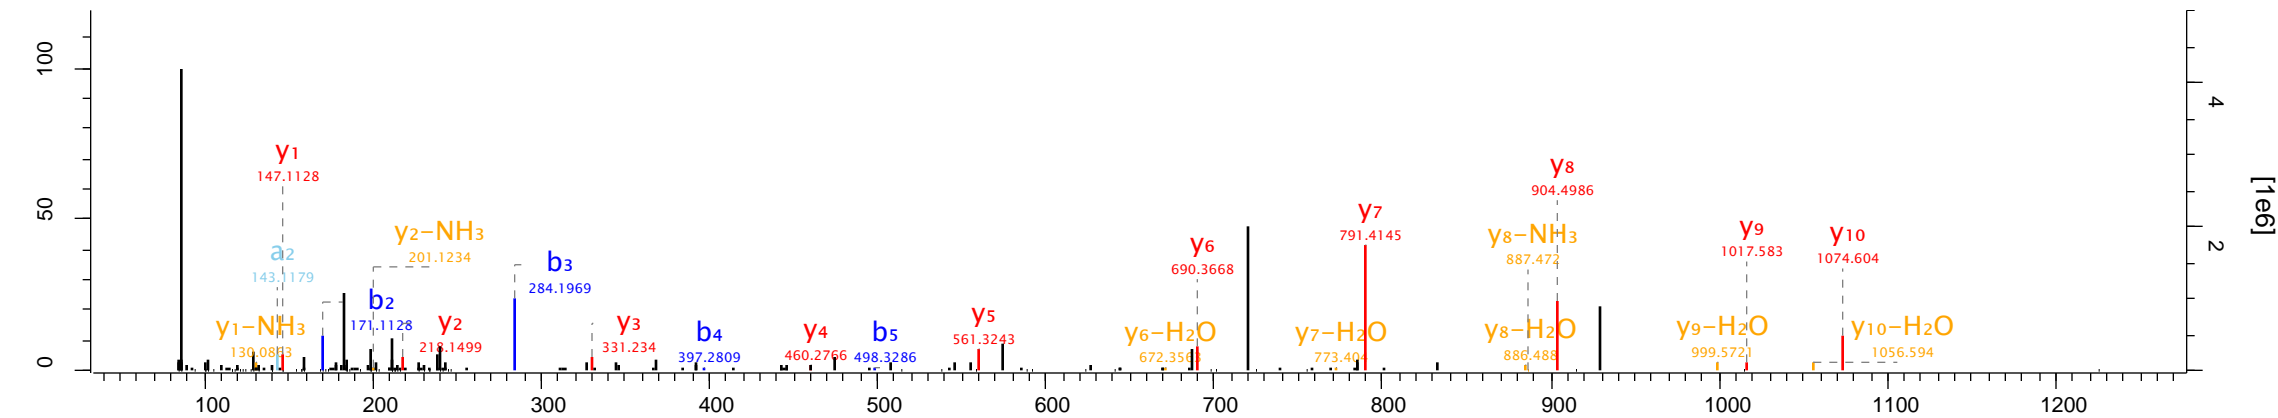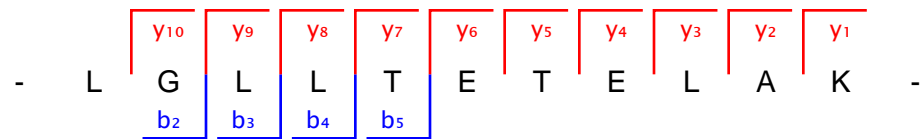

Raw file Scan Method Score m/z Gene names

20140602\_QEp4\_FaHo\_SA\_SIR2\_03 8701 FTMS; HCD 106.44 664.35 YCP4

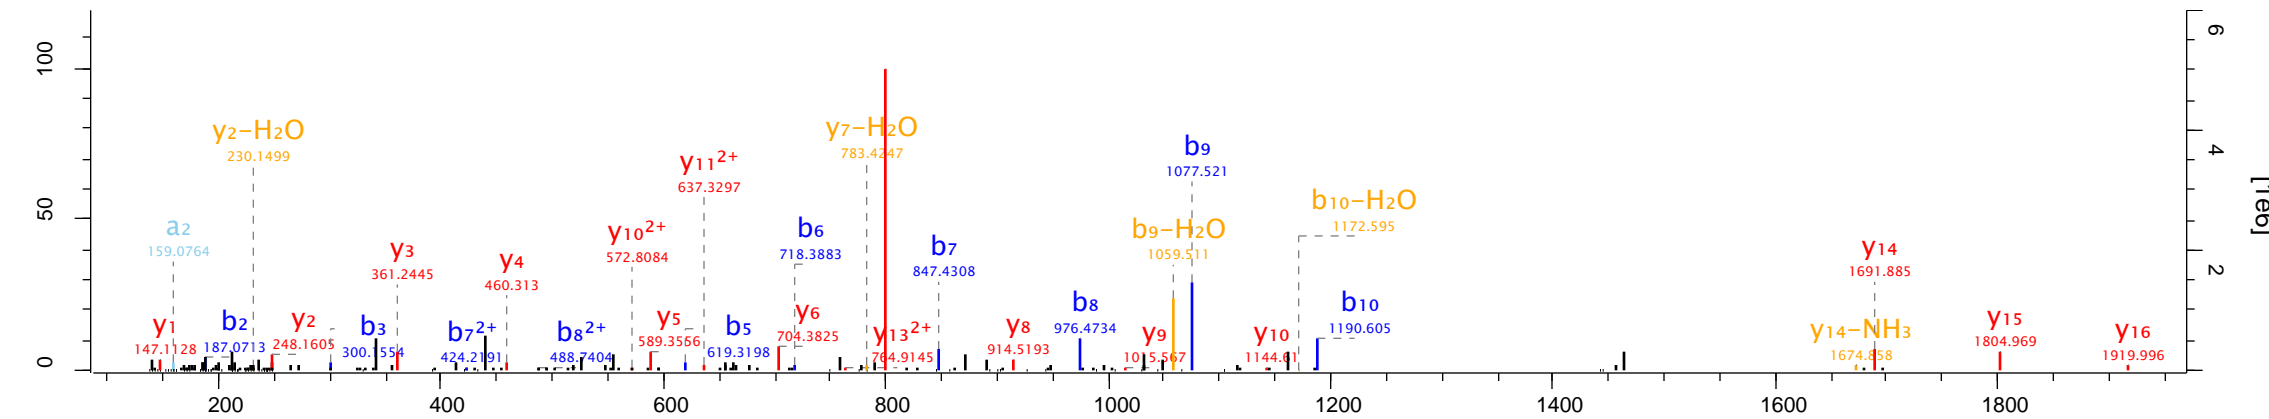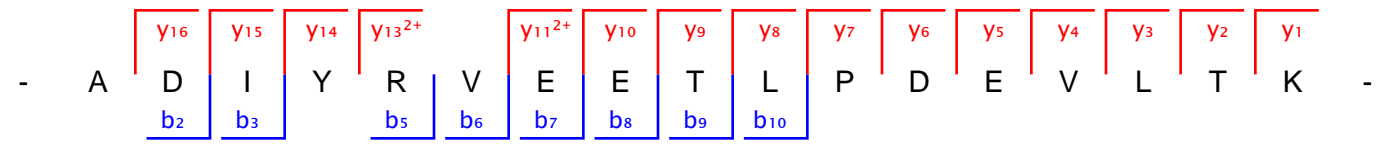

Raw file Scan Method Score m/z Gene names

20140602\_QEp4\_FaHo\_SA\_SIR2\_03 9437 FTMS; HCD 251.35 1088.58 RPL9B

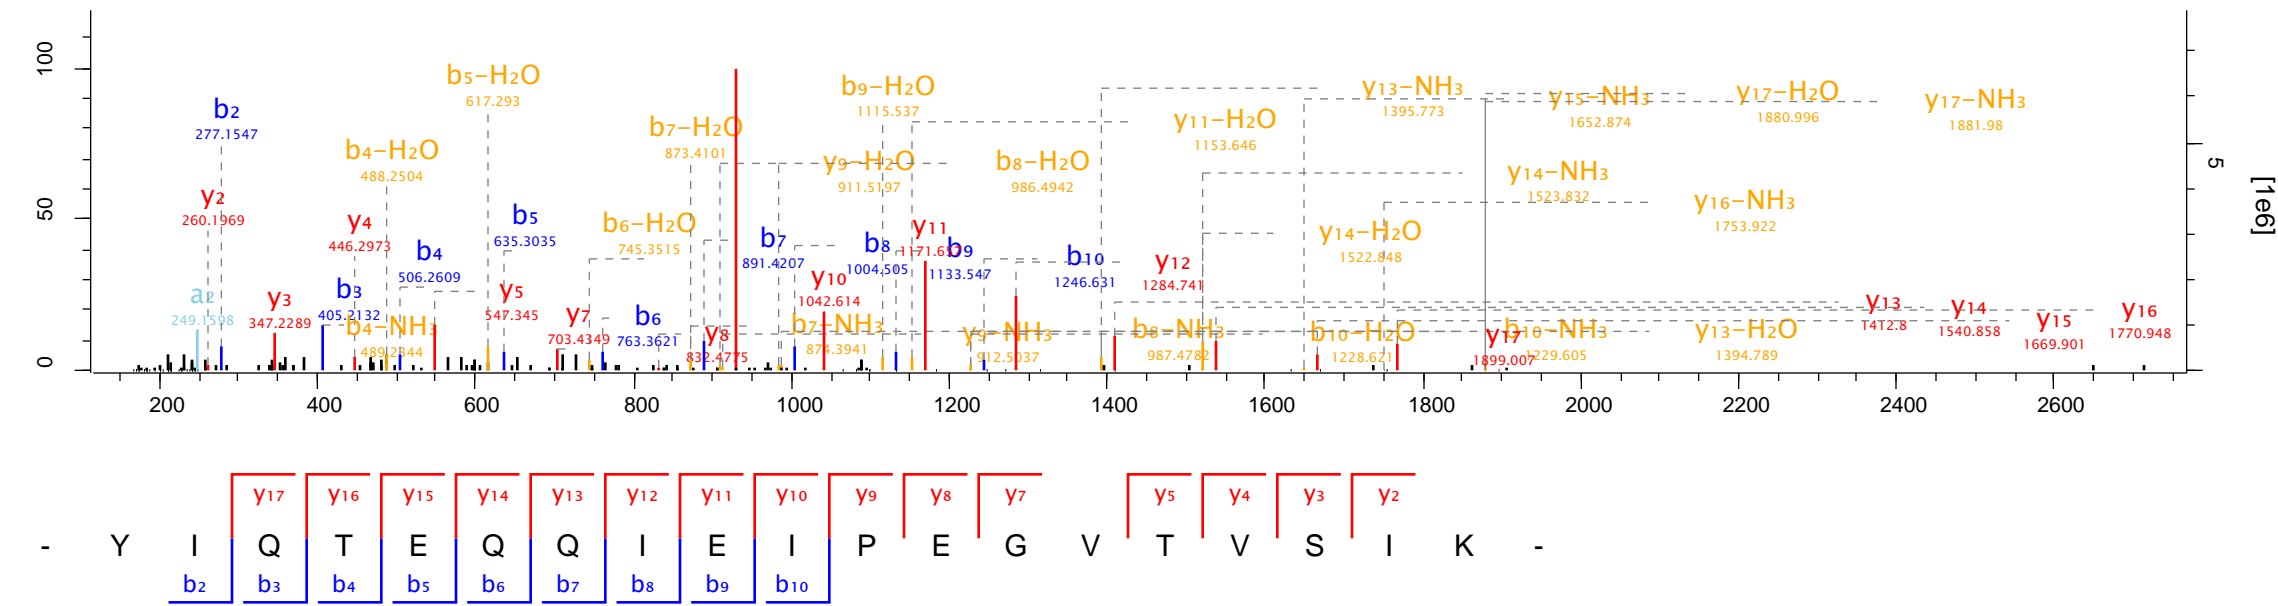

Raw file Scan Method Score m/z Gene names

20140602\_QEp4\_FaHo\_SA\_SIR2\_03 9921 FTMS; HCD 193.42 881.8 ATP16

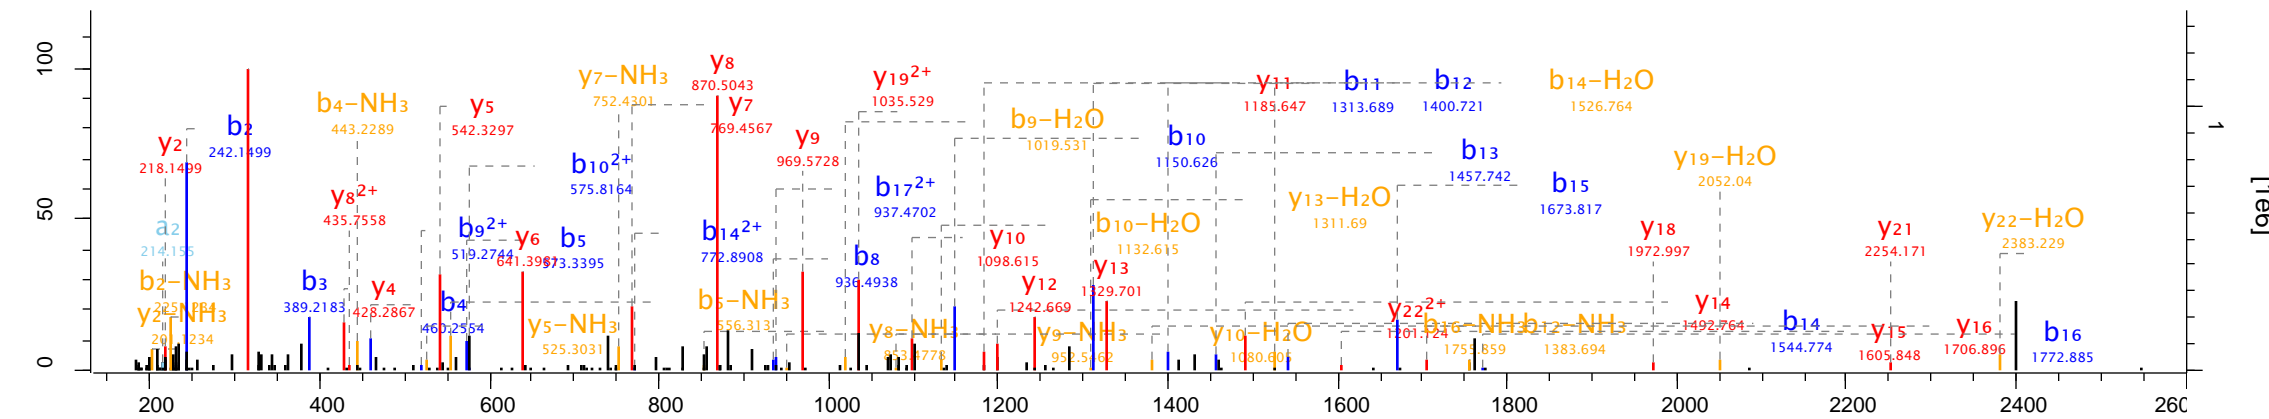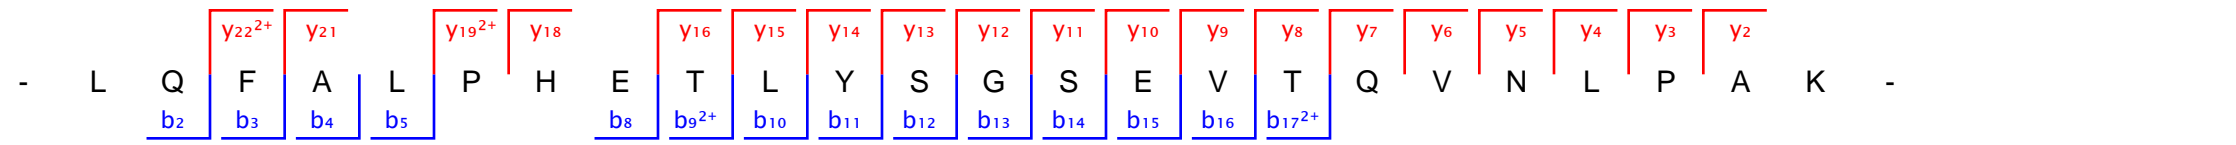

Raw file Scan Method Score m/z Gene names

20140602\_QEp4\_FaHo\_SA\_SIR2\_03

9926 FTMS; HCD 75.1 748.36 VMA5

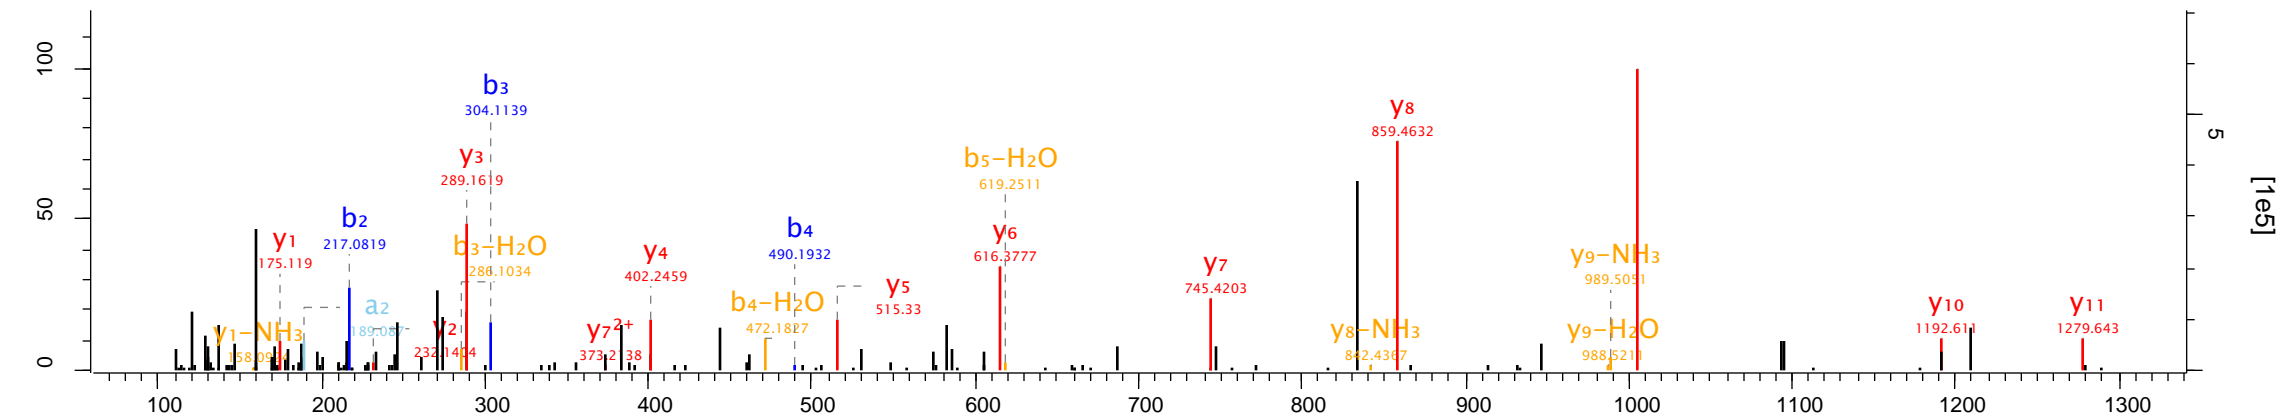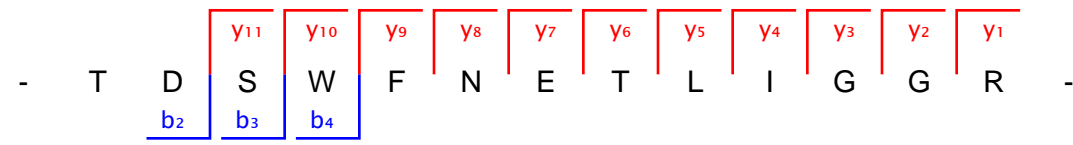

| Raw file                      | Scan  | Method    | Score | m/z    | Gene names |
|-------------------------------|-------|-----------|-------|--------|------------|
| 20140602_QEp4_FaHo_SA_SIR2_03 | 10095 | FTMS; HCD | 88.43 | 595.34 | FMP52      |

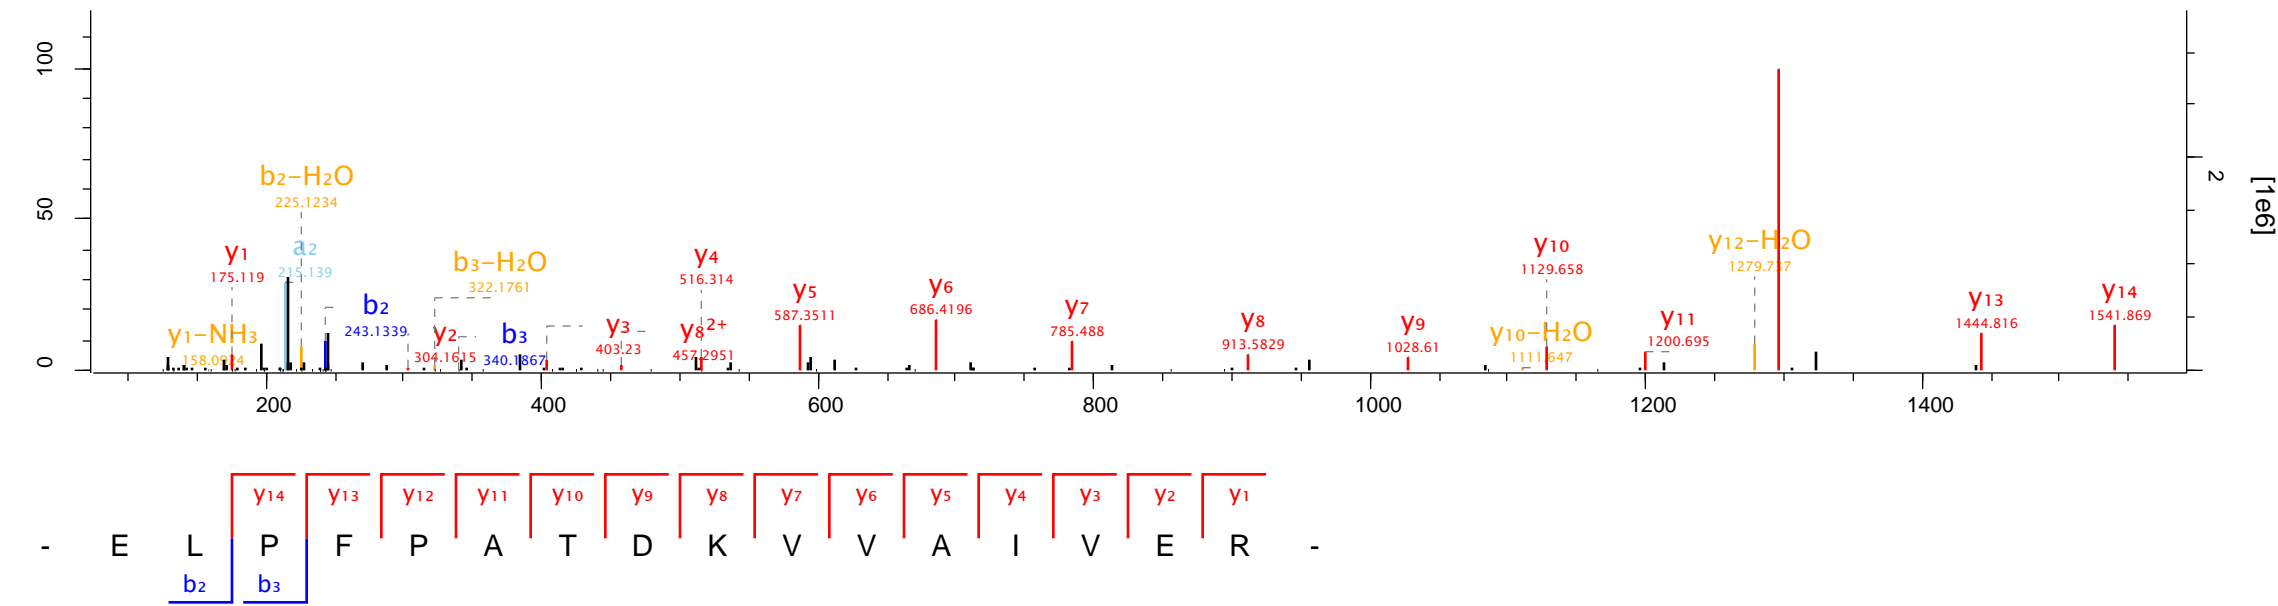

| Raw file                      | Scan | Method    | Score  | m/z    | Gene names    |
|-------------------------------|------|-----------|--------|--------|---------------|
| 20140602_QEp4_FaHo_SA_SNF2_02 | 3172 | FTMS; HCD | 120.46 | 423.73 | RPL24A;RPL24B |

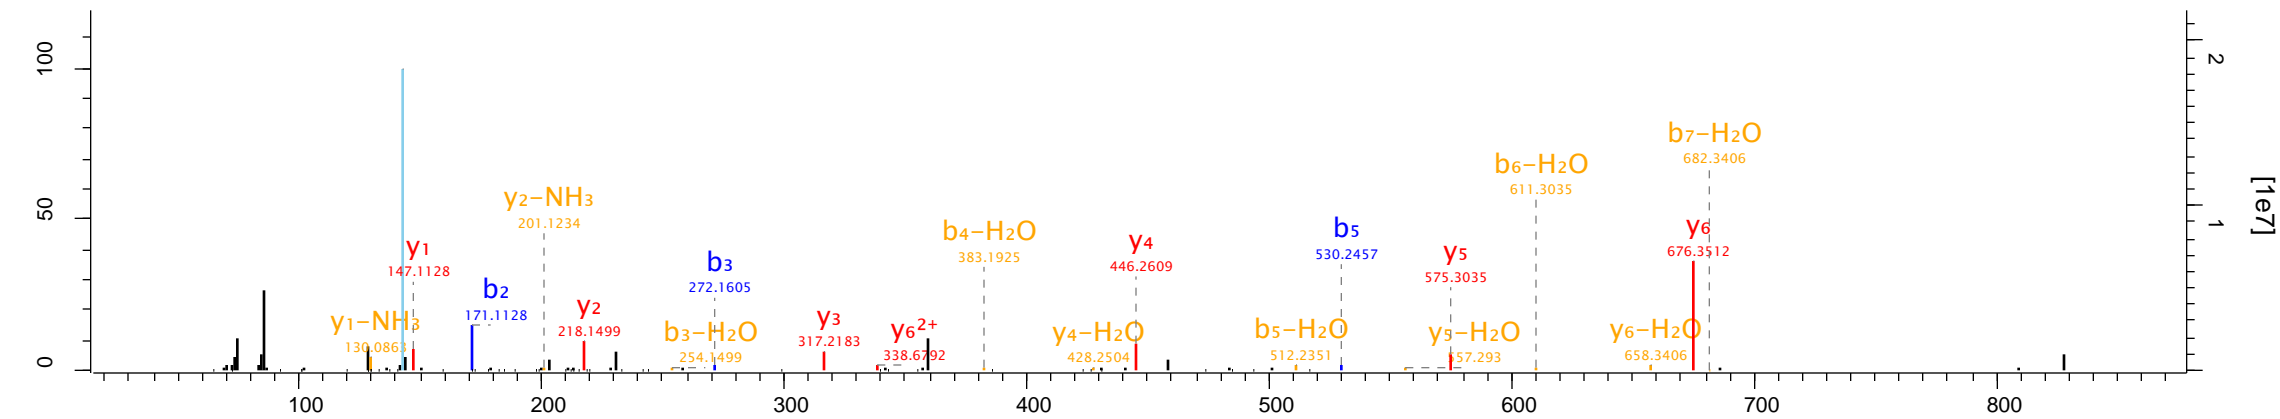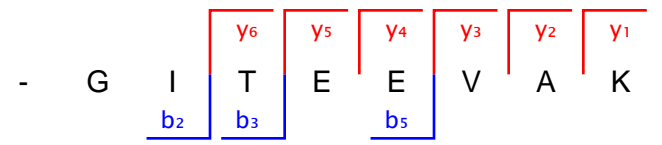

| Raw file                      | Scan | Method    | Score  | m/z    | Gene names    |
|-------------------------------|------|-----------|--------|--------|---------------|
| 20140602_QEp4_FaHo_SA_SNF2_02 | 3183 | FTMS; HCD | 116.37 | 435.28 | RPL14B;RPL14A |

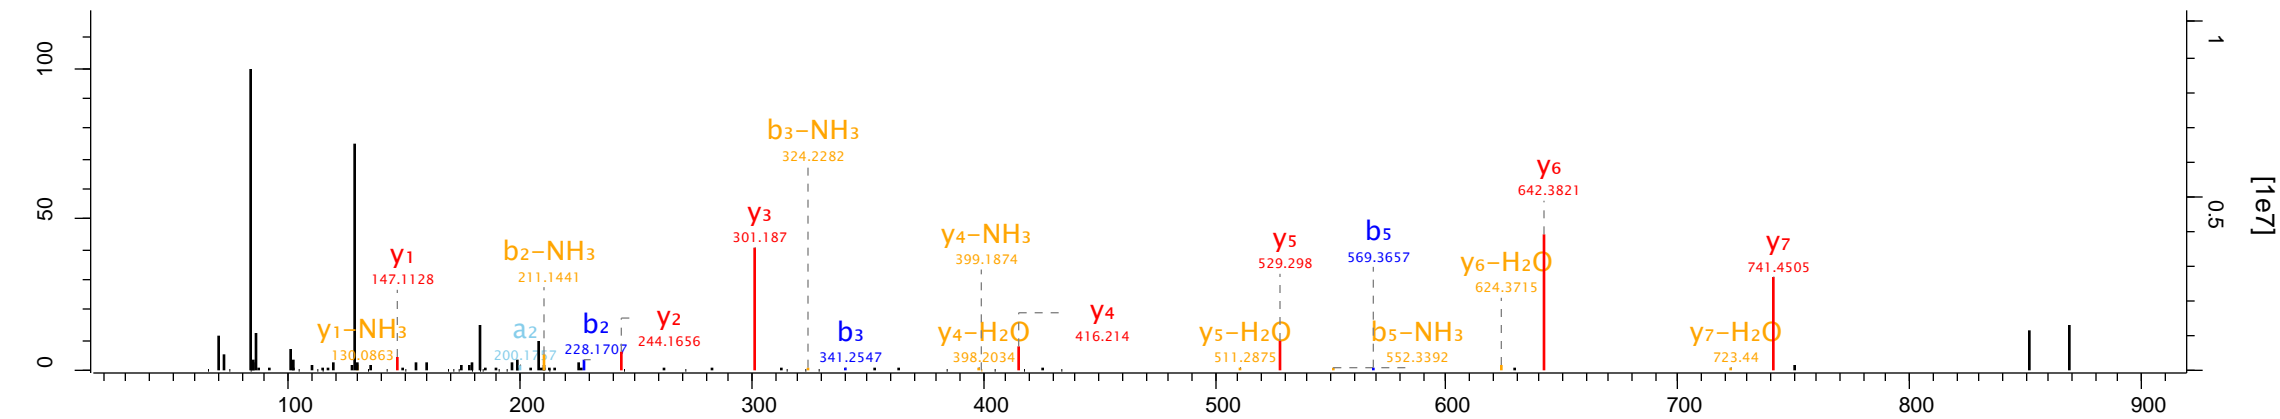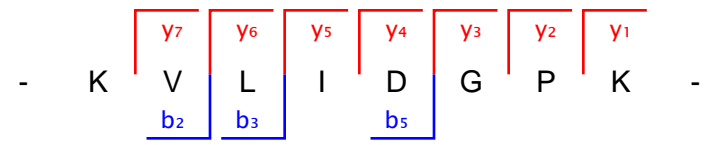



Raw file 20140602\_QEp4\_FaHo\_SA\_SNF2\_02 Scan 4817 Method FTMS; HCD Score 194.94 m/z 546.78 Gene names RPS14B;RPS14A

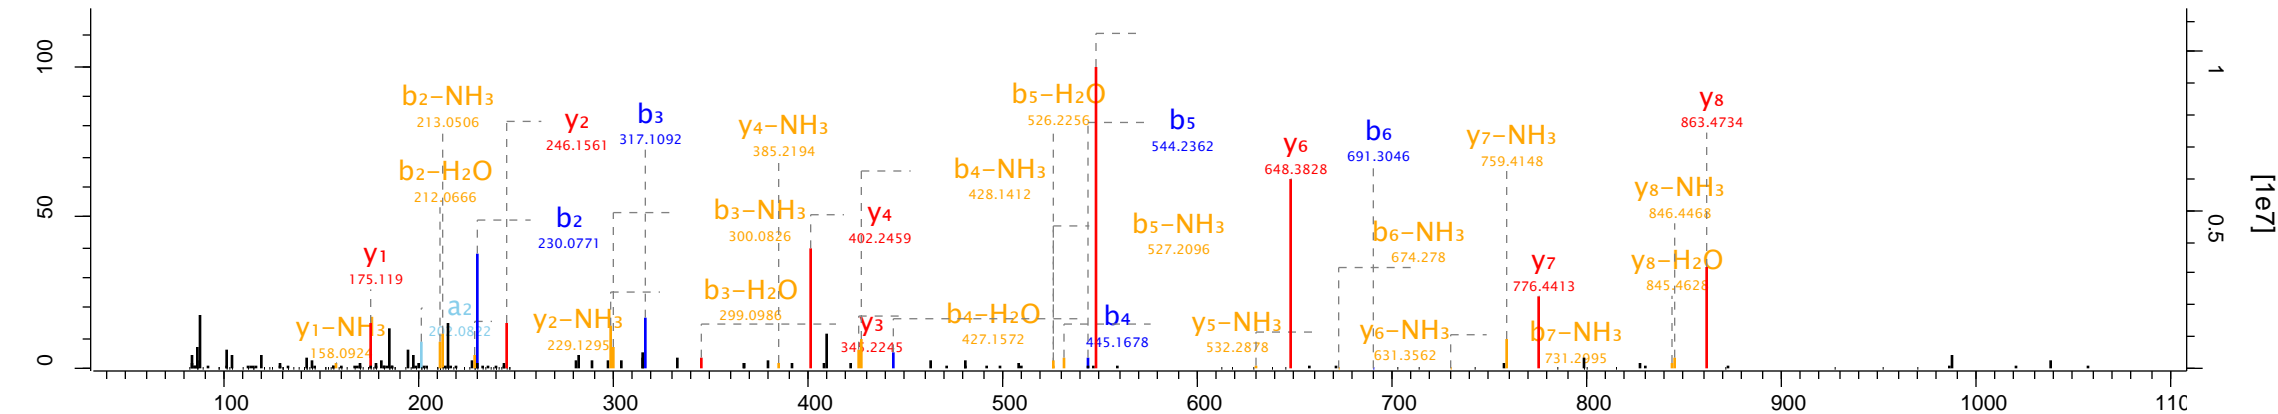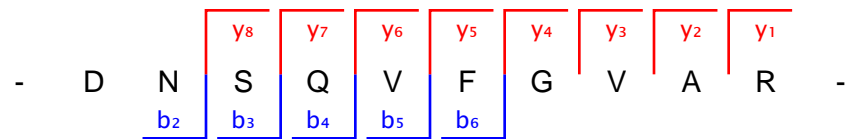

| Raw file                      | Scan | Method    | Score | m/z    |
|-------------------------------|------|-----------|-------|--------|
| 20140602_QEp4_FaHo_SA_SNF2_02 | 8653 | FTMS; HCD | 7.71  | 649.63 |

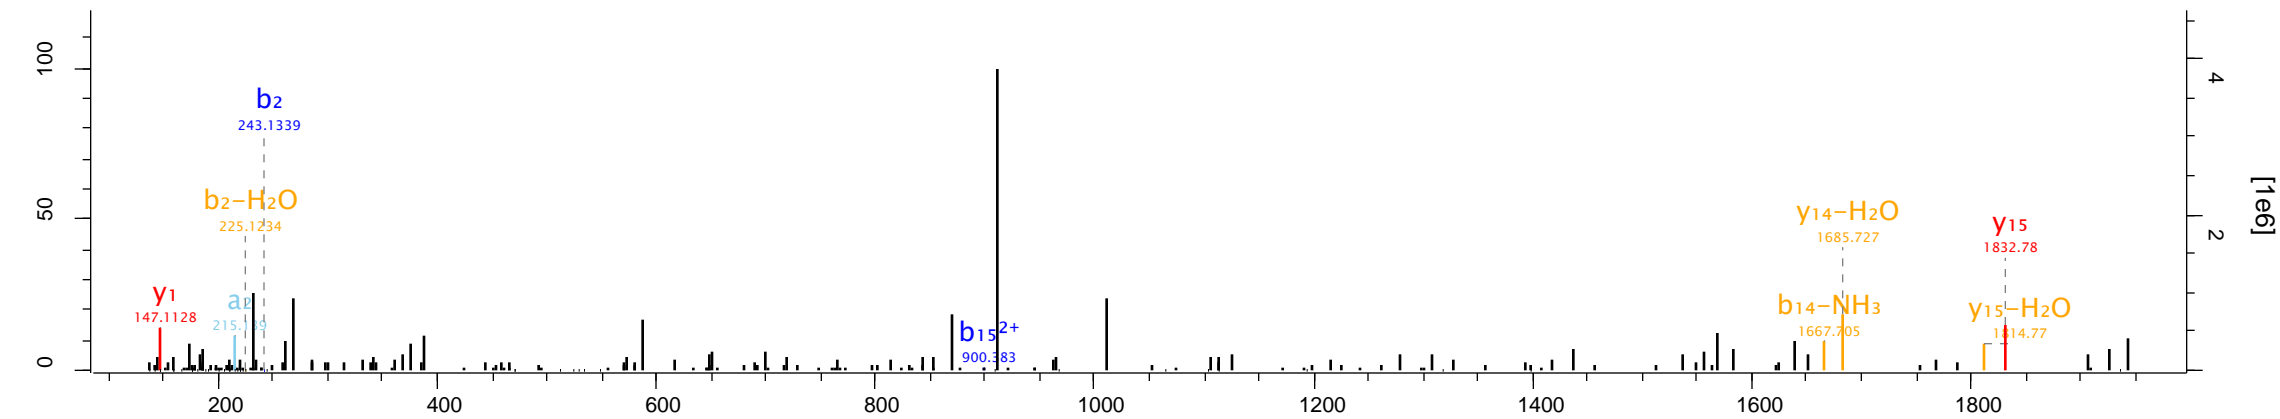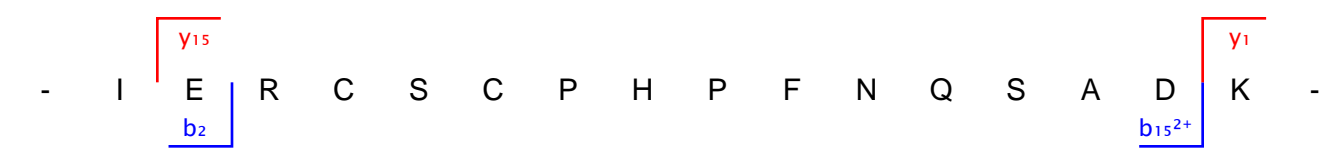

Raw file Scan Method Score m/z  
 20140602\_QEp4\_FaHo\_SA\_SNF2\_02 9226 FTMS; HCD 160.43 821.93

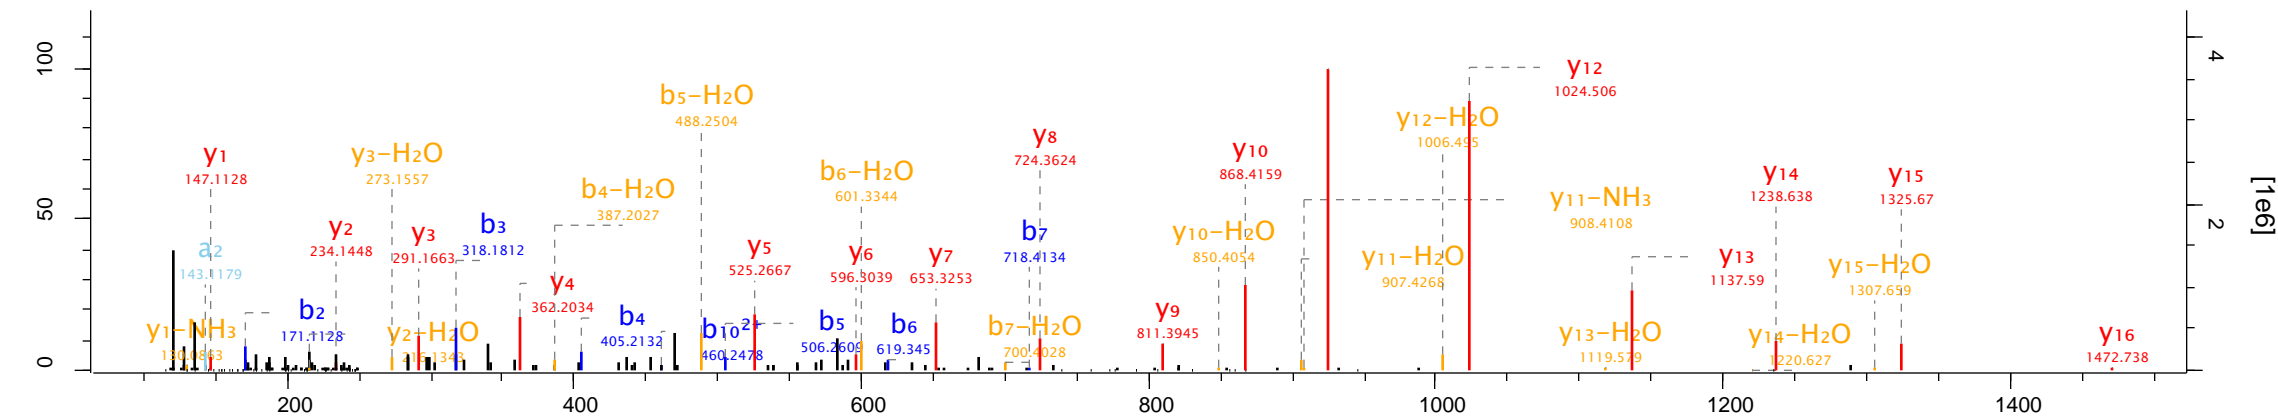

- G L F S T I V G G S A G A Y A G S K -

b<sub>2</sub> b<sub>3</sub> b<sub>4</sub> b<sub>5</sub> b<sub>6</sub> b<sub>7</sub> b<sub>10</sub><sup>2+</sup>

y<sub>16</sub> y<sub>15</sub> y<sub>14</sub> y<sub>13</sub> y<sub>12</sub> y<sub>11</sub> y<sub>10</sub> y<sub>9</sub> y<sub>8</sub> y<sub>7</sub> y<sub>6</sub> y<sub>5</sub> y<sub>4</sub> y<sub>3</sub> y<sub>2</sub> y<sub>1</sub>

Raw file Scan Method Score m/z Gene names

20140602\_QEp4\_FaHo\_SA\_SNT2\_01 4180 FTMS; HCD 0.79 526.81 RMI1

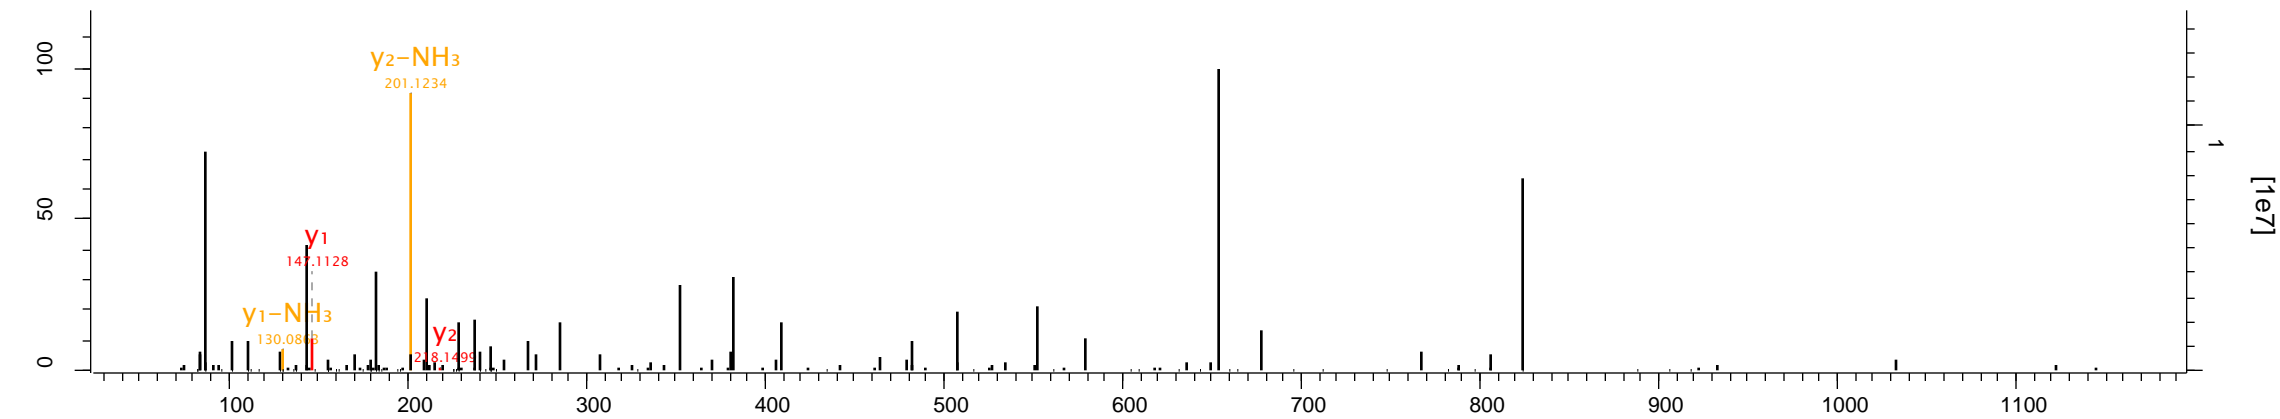

- K Y E V I T Q V D M E D D G N V A D N N C A K -

y2 y1

20140602\_QEp4\_FaHo\_405 FTMS; 370.820 TY1B-ML1;TY1B-BR;TY1A-PR1;TY1A-A;TY1A-DR4;TY1B-H;TY1B-MR2;TY1B-OR;TY1B-DR1;TY1B-NL2;TY1B-PR2;TY1B-DR5;TY1B-PR1;TY1B-JR2;TY1B-NL1;TY1A-PL;TY1A-LR2

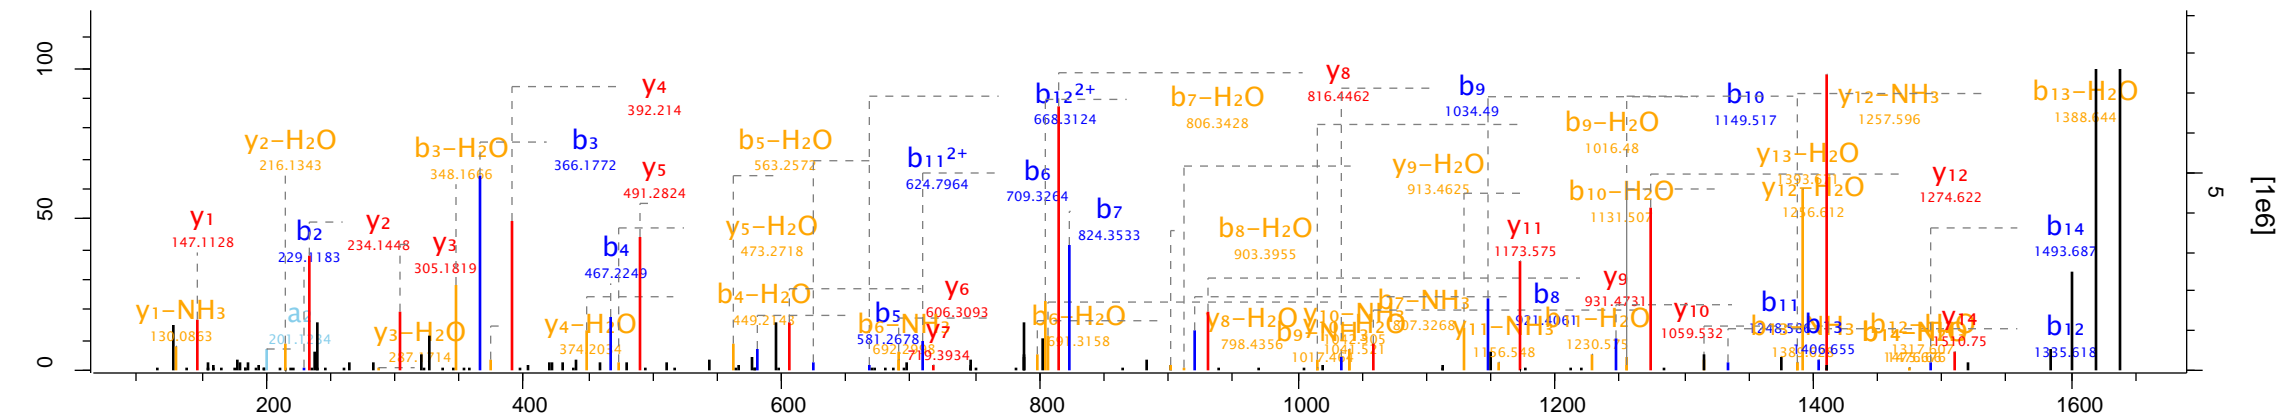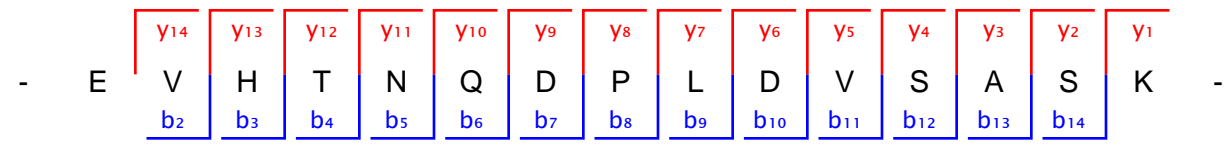

Raw file

Scan Method

Score

m/z

Gene names

20140602\_QEp4\_FaHo\_SA\_SNT2593 FTMS; 87.26 482.24 TY2B-C;TY2B-B;TY2B-GR2;TY2B-F;TY2B-GR1;TY2A-GR1;TY2B-OR1;TY2A-DR2;TY2B-DR1;TY2B-DR3;TY2B-LR1;TY2B-OR2;TY2A-OR1;TY2A-LR2;TY2A-OR2;

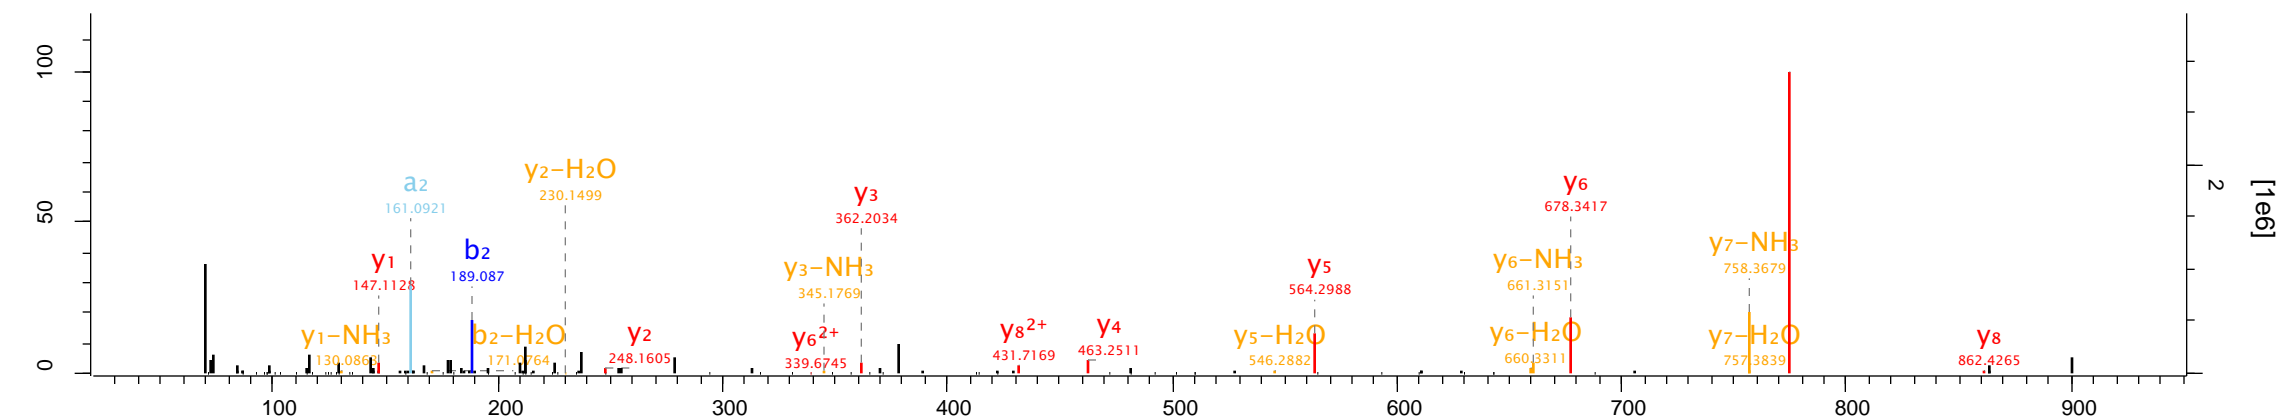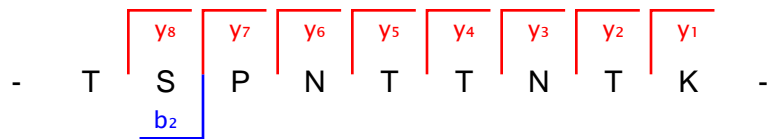

20140602\_QEp4\_Fa 61; N 86637(TY1B-ML1;TY1B-BR;TY1B-H;TY1B-MR2;TY1B-OR;TY1B-DR1;TY1B-NL2;TY1B-PR2;TY1B-DR5;TY1B-PR1;TY1B-JR2;TY1B-NL1;TY2B-C;TY1B-OL;TY1B-LR4;TY1B-ML2;TY1B-DR3;TY1B-

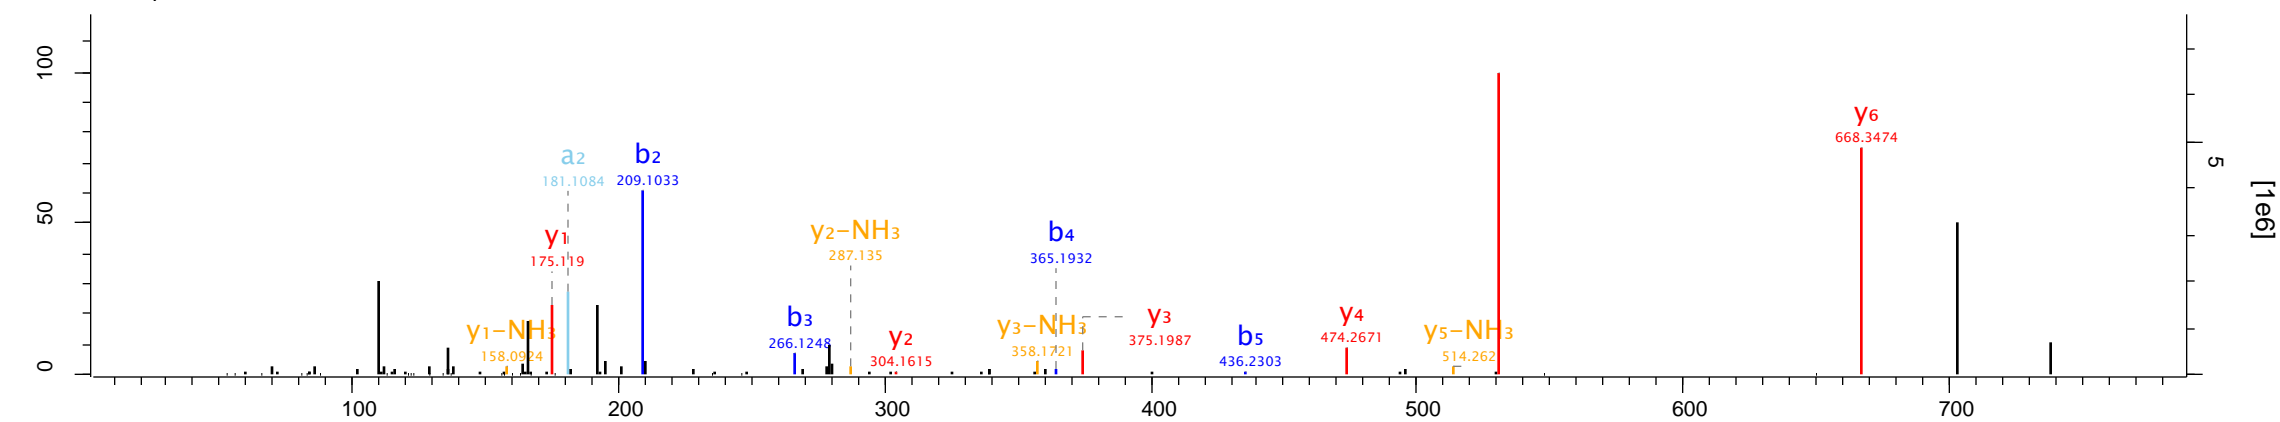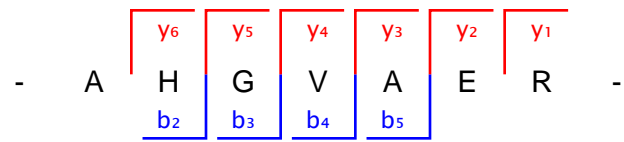

20140602\_QEp4\_FaHo\_SA\_2100\_FTMS; 138.8413.6 TY1B-ML1;TY1B-BR;TY1B-H;TY1B-MR2;TY1B-OR;TY1B-DR1;TY1B-NL2;TY1B-PR2;TY1B-DR5;TY1B-PR1;TY1B-JR2;TY1B-NL1;TY1B-OL;TY1B-LR4;TY1B-ML2;TY1B-DR3;

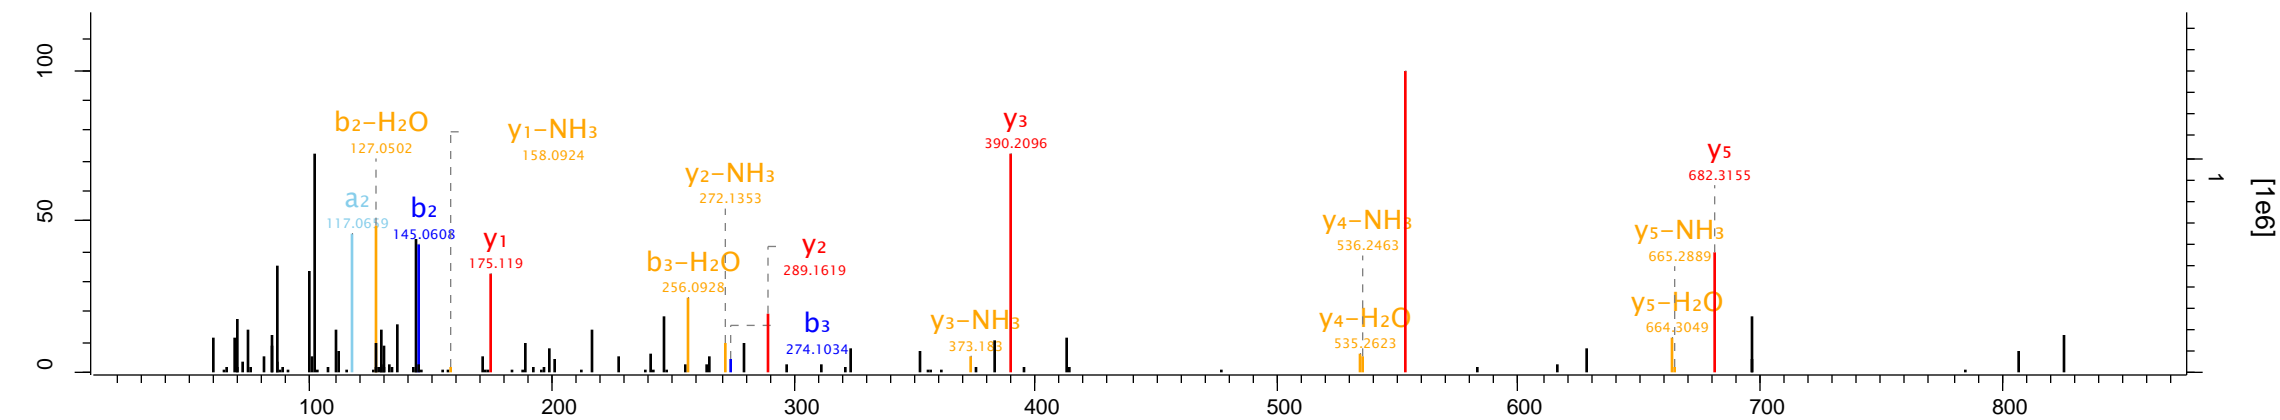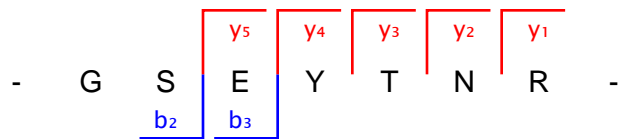



Raw file Scan Method Score m/z Gene names

20140602\_QEp4\_FaHo\_SA\_SNT46631 FTMS; 157.71561.21; TY1B-ML1;TY1B-BR;TY1B-H;TY1B-MR2;TY1B-OR;TY1B-PR2;TY1B-DR5;TY1B-PR1;TY1B-JR2;TY1B-NL1;TY1B-OL;TY1B-LR4;TY1B-ML2;TY1B-PR3;TY1B-PL;TY1B-

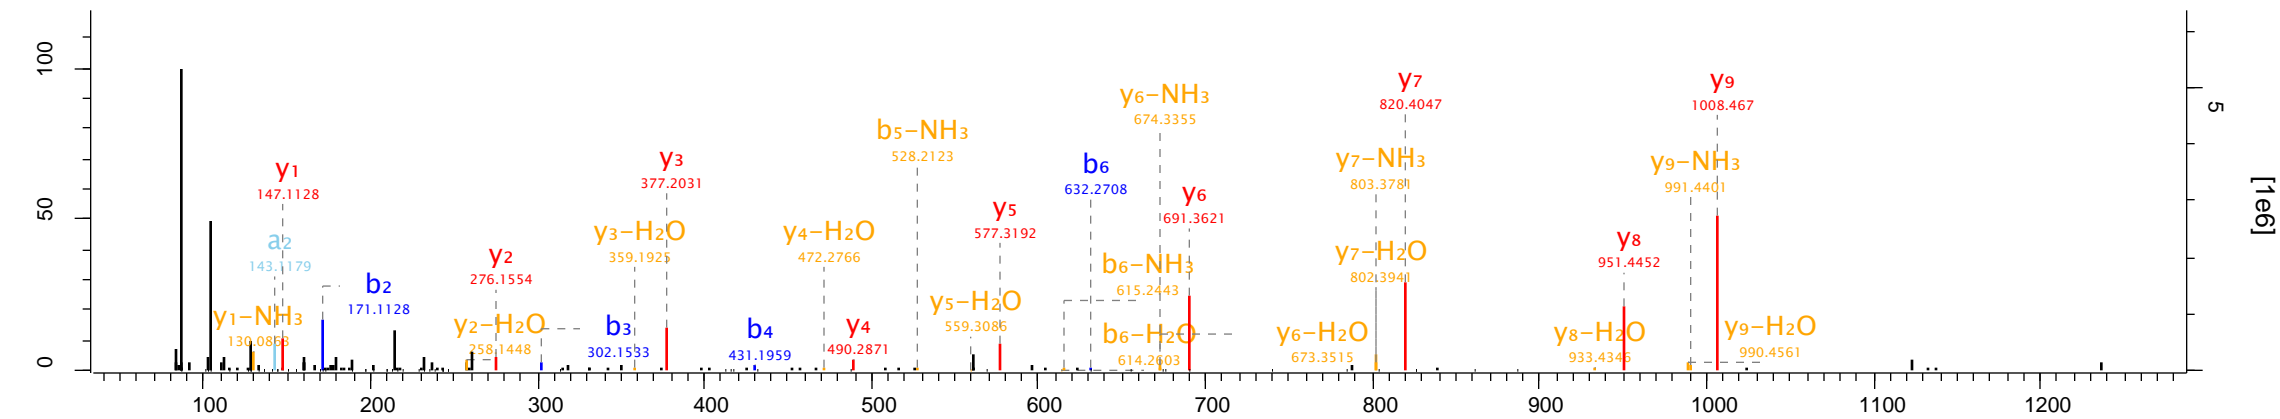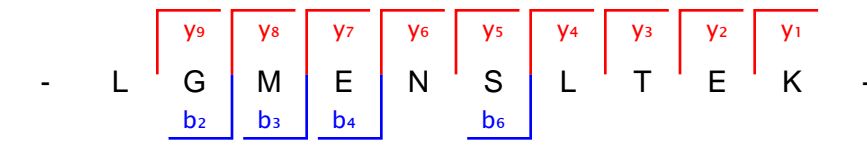

| Raw file                      | Scan | Method    | Score  | m/z    | Gene names    |
|-------------------------------|------|-----------|--------|--------|---------------|
| 20140602_QEp4_FaHo_SA_SNT2_03 | 8235 | FTMS; HCD | 169.65 | 642.37 | RPL31A;RPL31B |

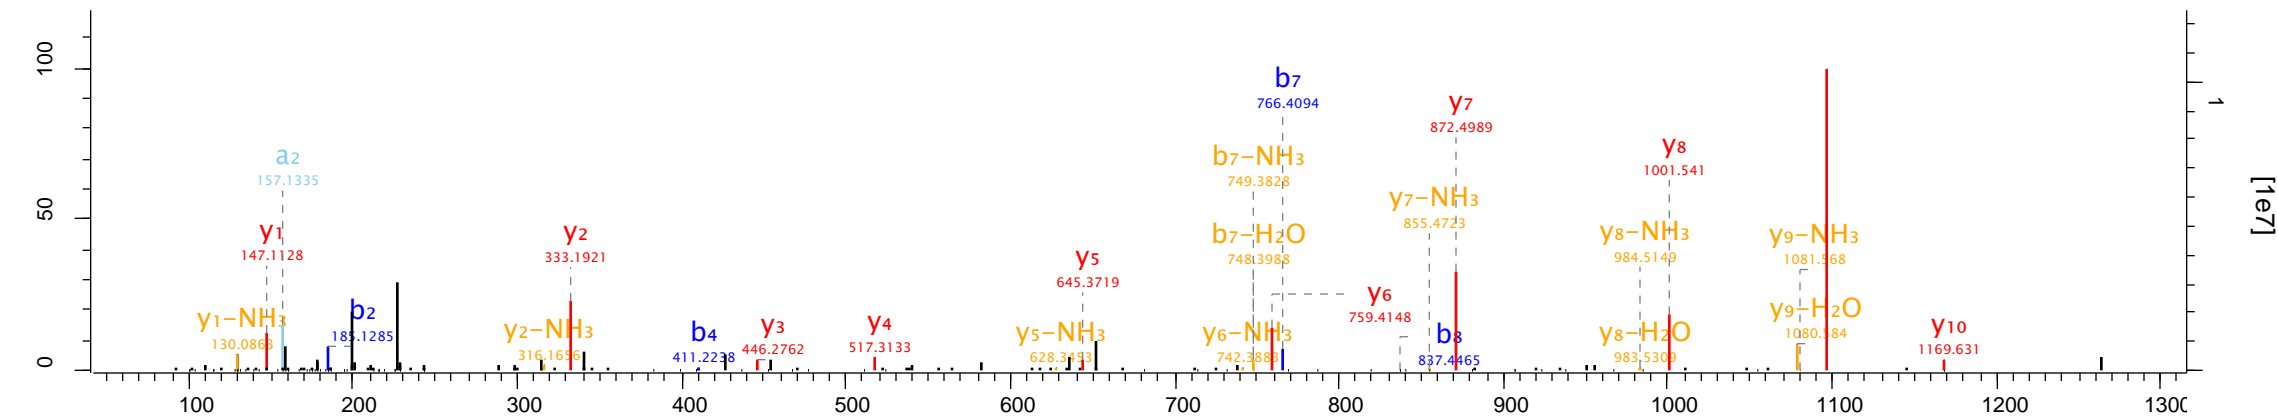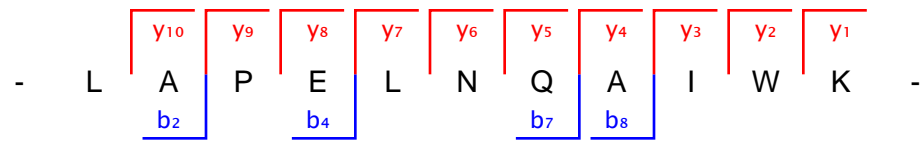

Raw file Scan Method Score m/z Gene names  
 20140602\_QEp4\_FaHo\_SA\_SPP1\_01 3273 FTMS; HCD 249.91 886.07 TY1B-JR2;TY1B-ML2

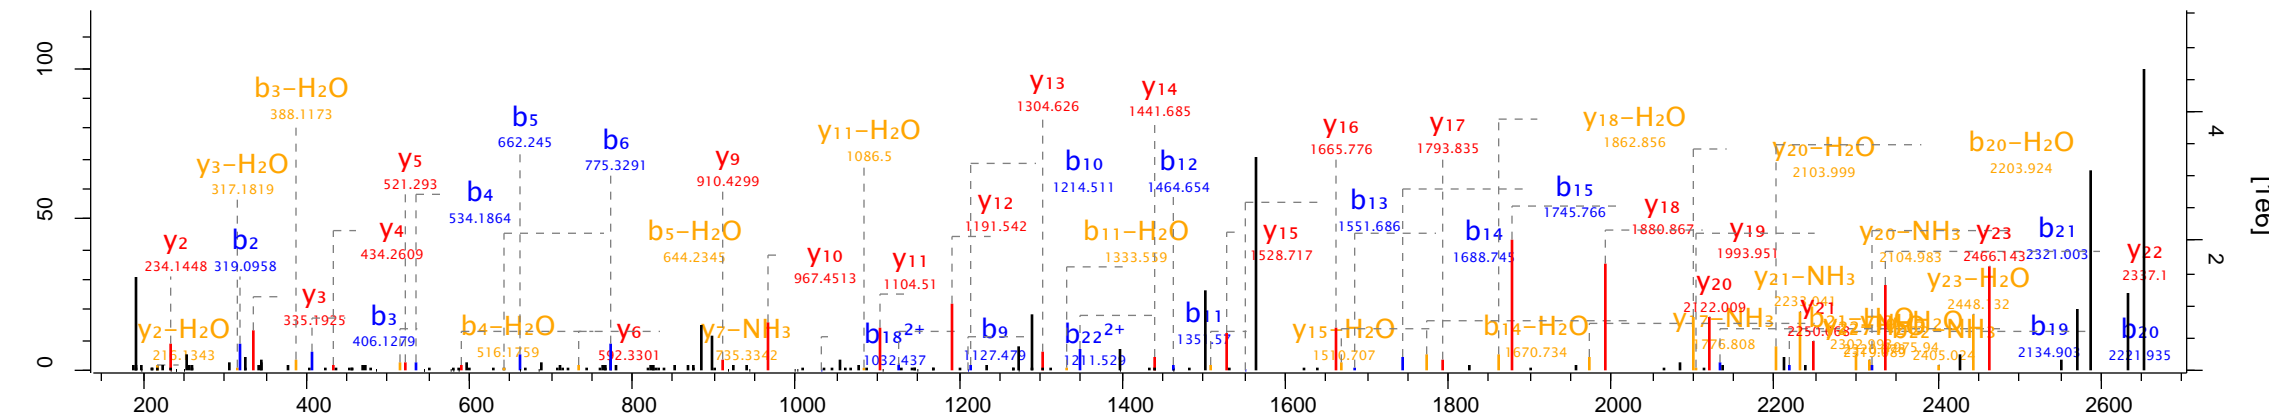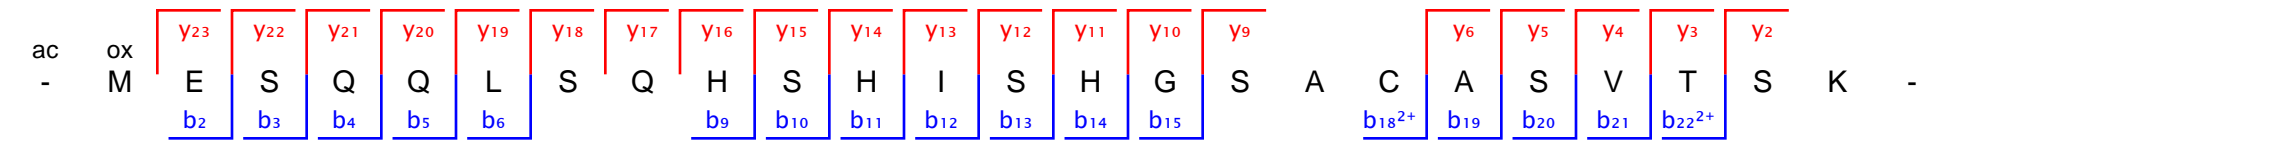

20140602\_QEp4\_FaHo\_SA\_SPP1\_0 3836 FTMS; HCC 405.88 806.37 TY1A-PR1;TY1A-A;TY1A-DR4;TY1B-PR1;TY1B-JR2;TY1A-PL;TY1A-LR2;TY1A-ER1;TY1A-DR6;TY1B-OL;TY1B-LR4;TY1B-ML2;TY1B-PR3;TY1B-PL;TY1B-L

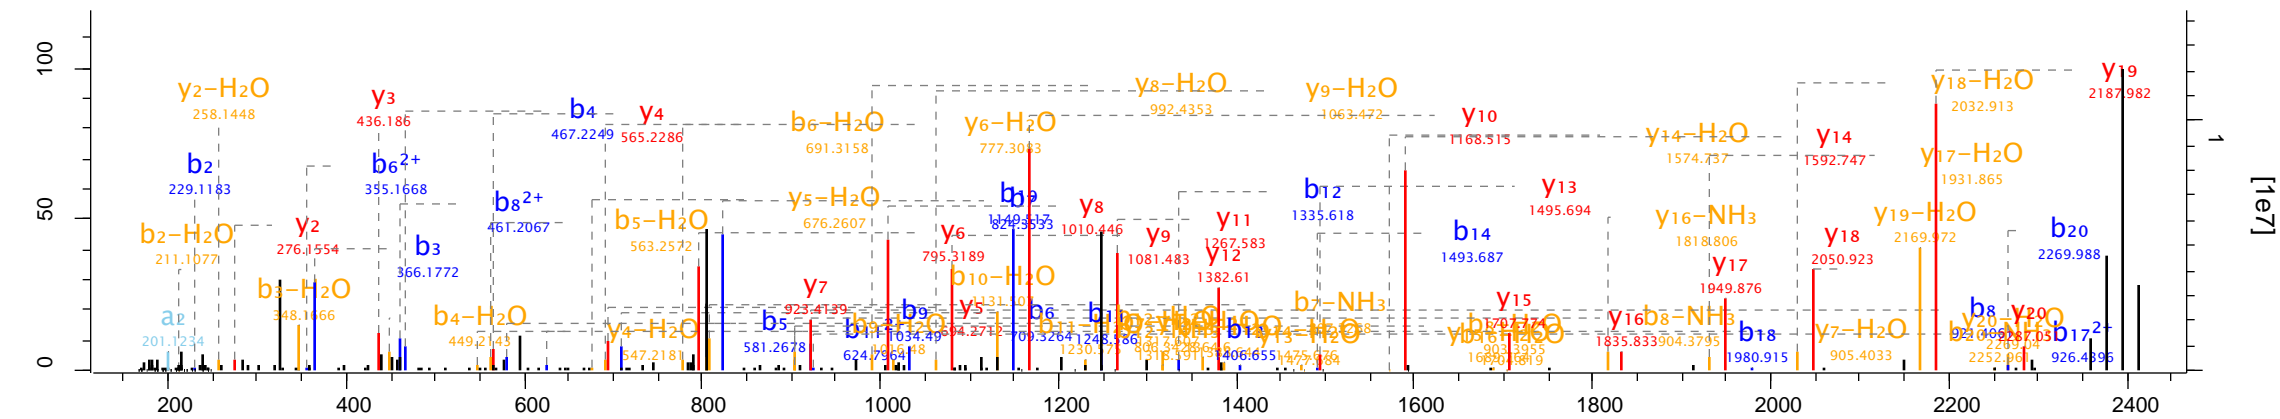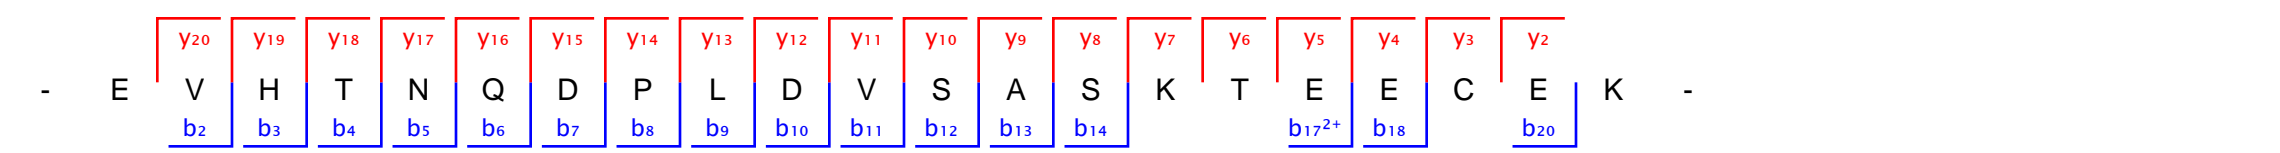

Raw file Scan Method Score m/z Gene names  
 20140602\_QEp4\_FaHo\_SA\_SPP1\_01 5705 FTMS; HCD 149.53 836.1 TY1A-PR1;TY1A-A;TY1A-DR4

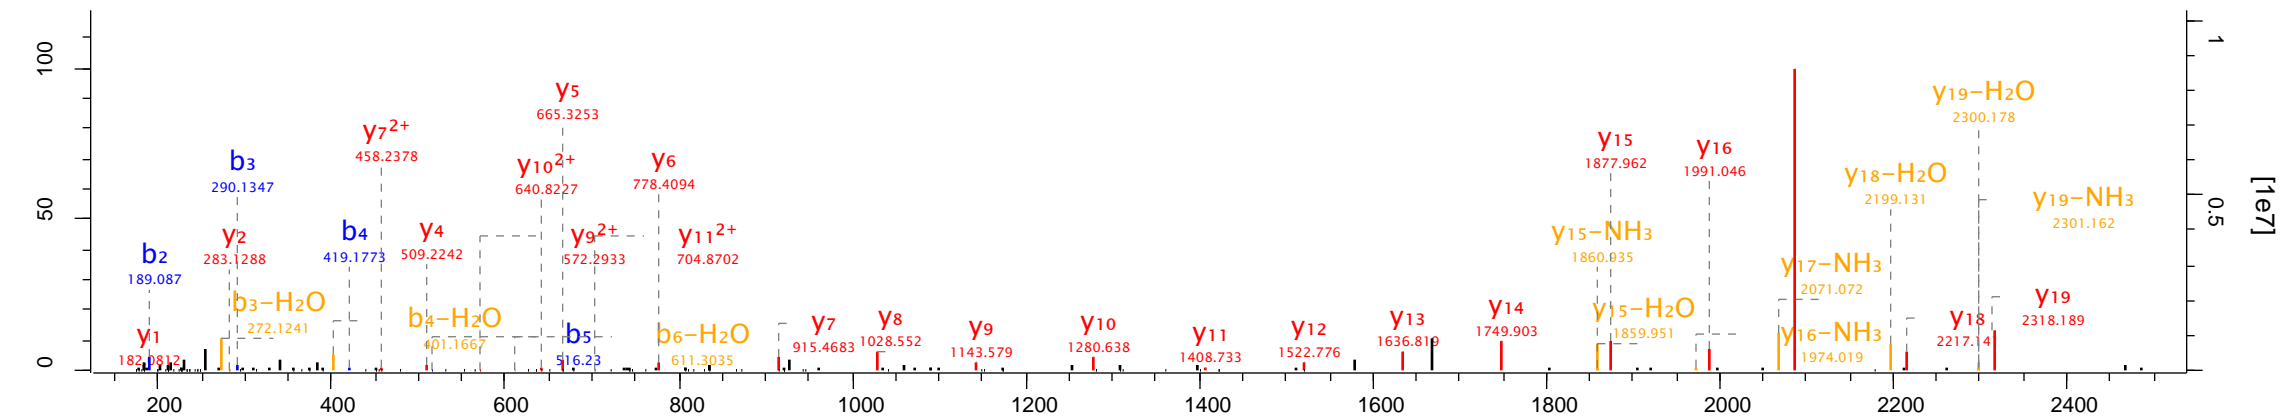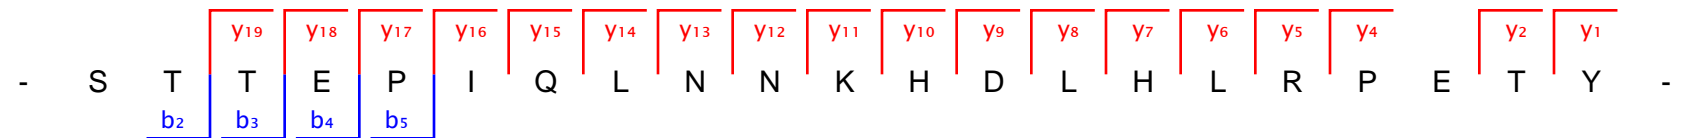

Raw file Scan Method Score m/z Gene names

20140602\_QEp4\_FaHo\_SA\_S 58L; FTMS; 77.78 583.3 TY1B-ML1;TY1B-BR;TY1B-OR;TY1B-DR1;TY1B-NL2;TY1B-PR2;TY1B-DR5;TY1B-PR1;TY1B-JR2;TY1B-NL1;TY1B-OL;TY1B-LR4;TY1B-ML2;TY1B-DR3;TY1B-PR3;TY1B-

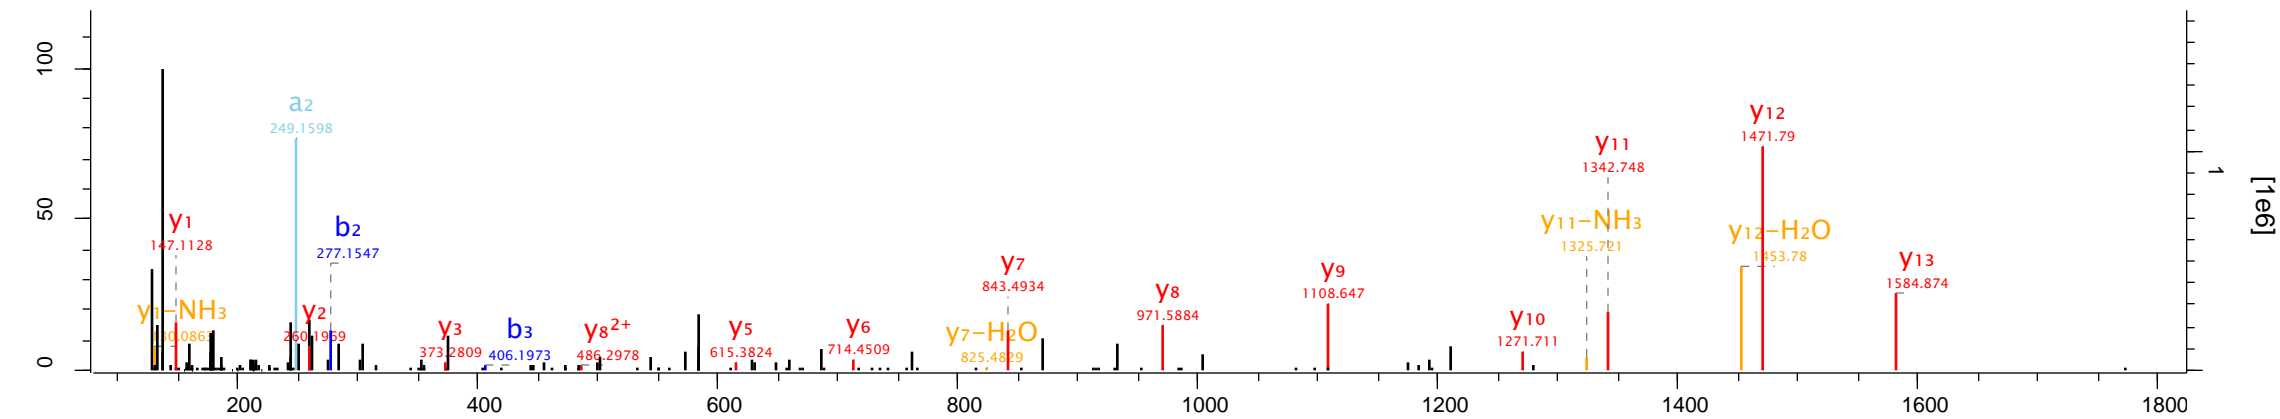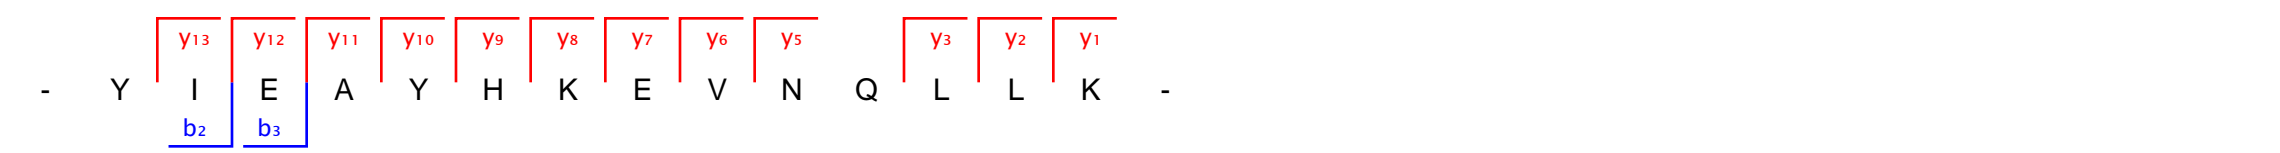

| Raw file                      | Scan | Method    | Score  | m/z    | Gene names  |
|-------------------------------|------|-----------|--------|--------|-------------|
| 20140602_QEp4_FaHo_SA_SPP1_02 | 3640 | FTMS; HCD | 100.02 | 433.24 | RPL7A;RPL7B |

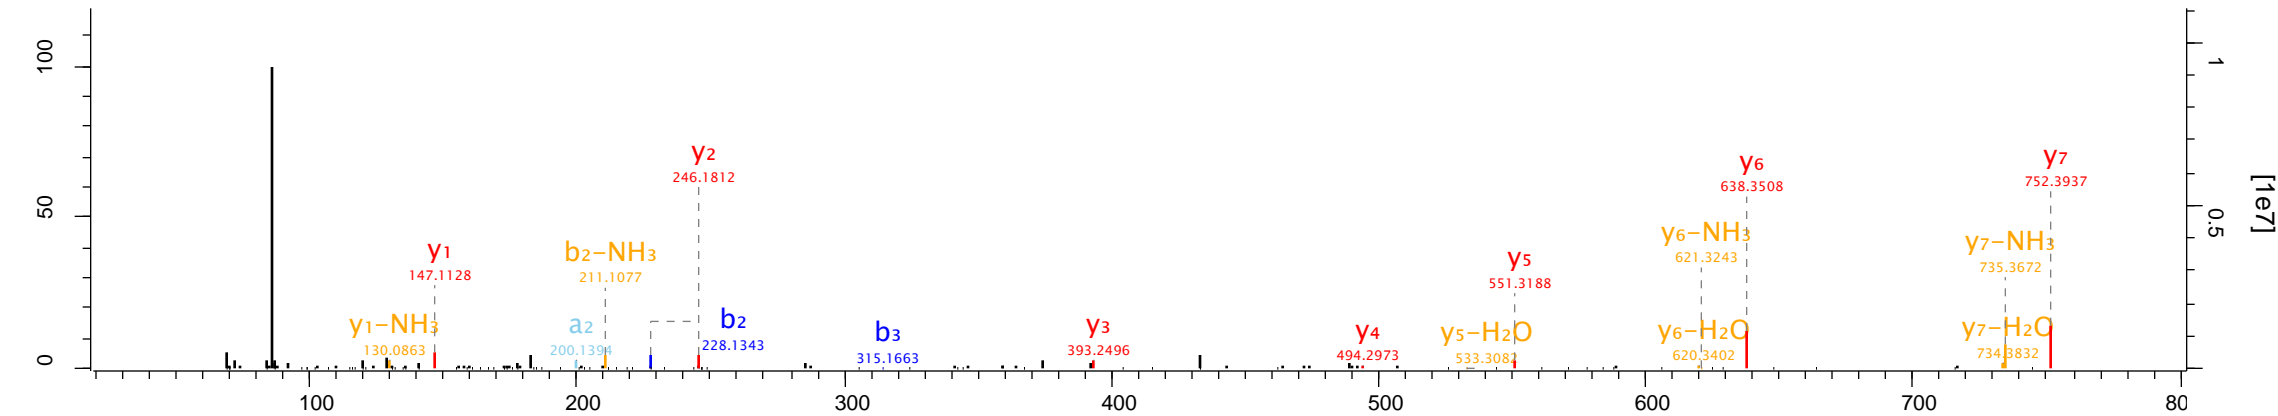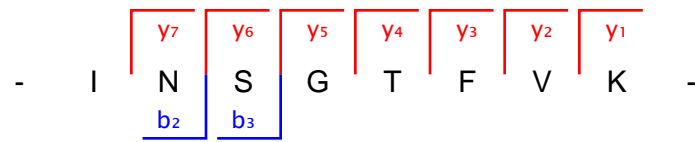

| Raw file                      | Scan | Method    | Score  | m/z    | Gene names    |
|-------------------------------|------|-----------|--------|--------|---------------|
| 20140602_QEp4_FaHo_SA_SPP1_02 | 7551 | FTMS; HCD | 128.75 | 446.76 | RPL14B;RPL14A |

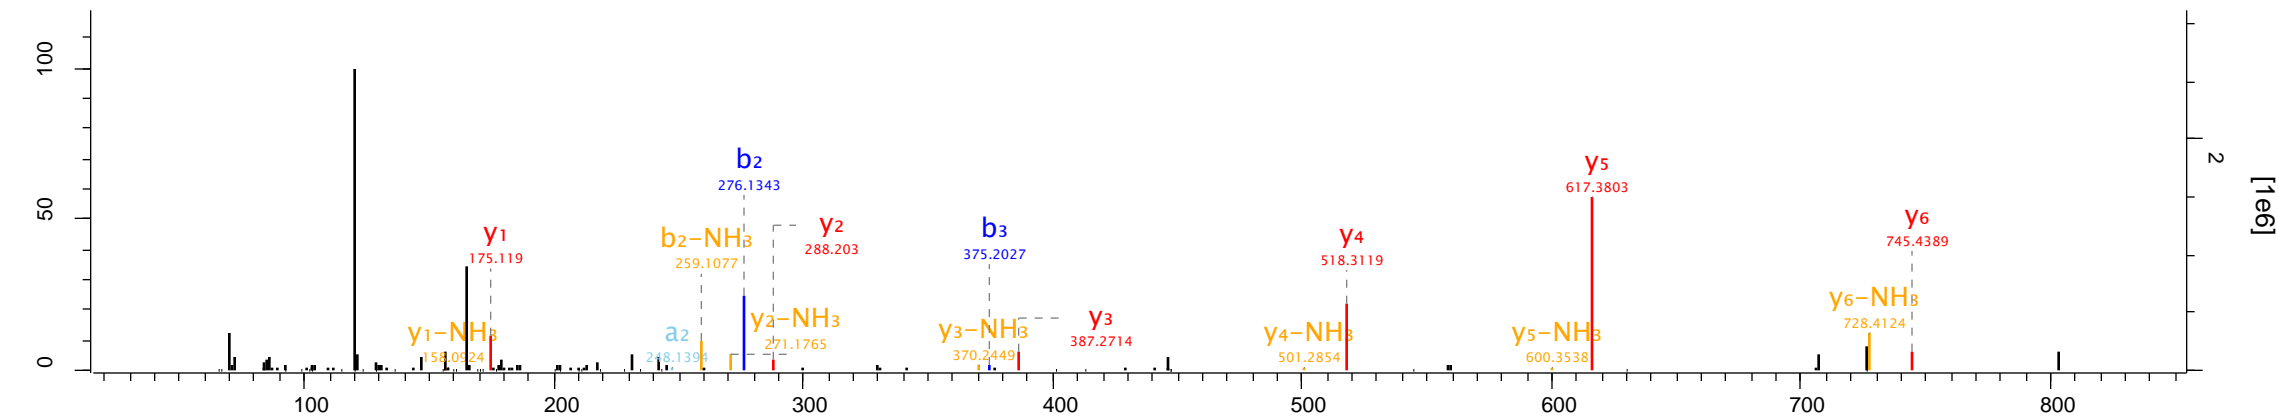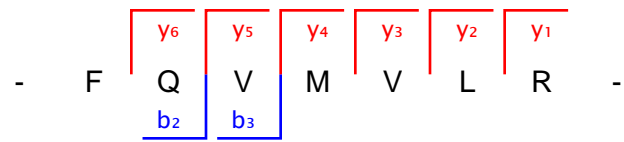



Raw file Scan Method Score m/z Gene names

20140602\_QEp4\_FaHo\_SA\_SPP1\_03 9441 FTMS; HCD 144.27 652.88 TY1B-DR1;TY1B-NL2;TY1B-PR1;TY2B-C;TY1B-LR4;TY1B-DR3;TY1B-DR6;TY2B-B;TY2B-GR2;TY2B-F;TY2B-GR1;TY2B-OR1;TY2B-DR1;TY2B-LR1;TY2B

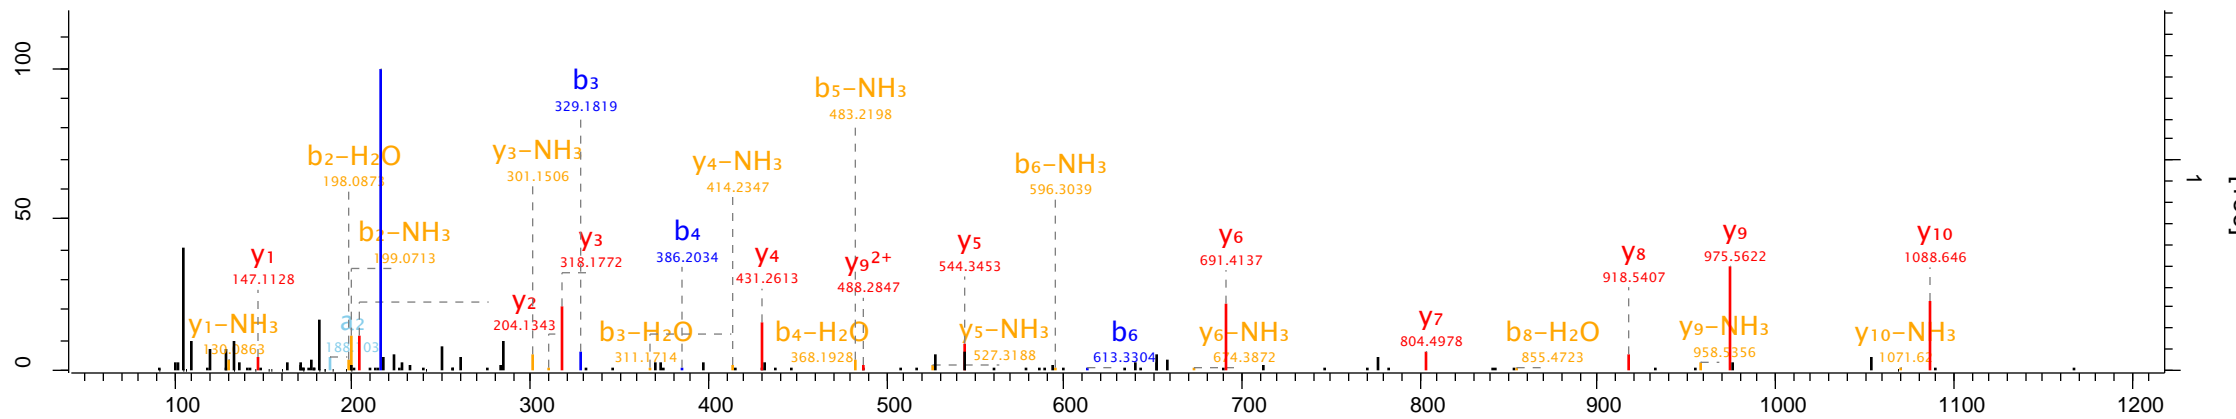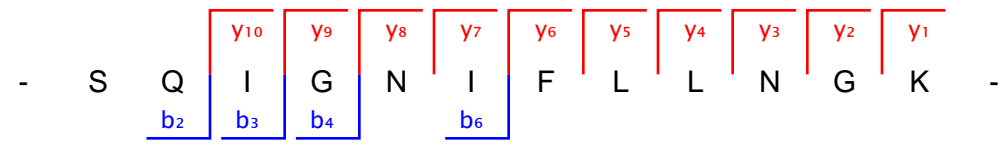

| Raw file                      | Scan | Method    | Score  | m/z    | Gene names |
|-------------------------------|------|-----------|--------|--------|------------|
| 20140602_QEp4_FaHo_SA_SPT7_01 | 3375 | FTMS; HCD | 108.92 | 408.22 | RPS14A     |

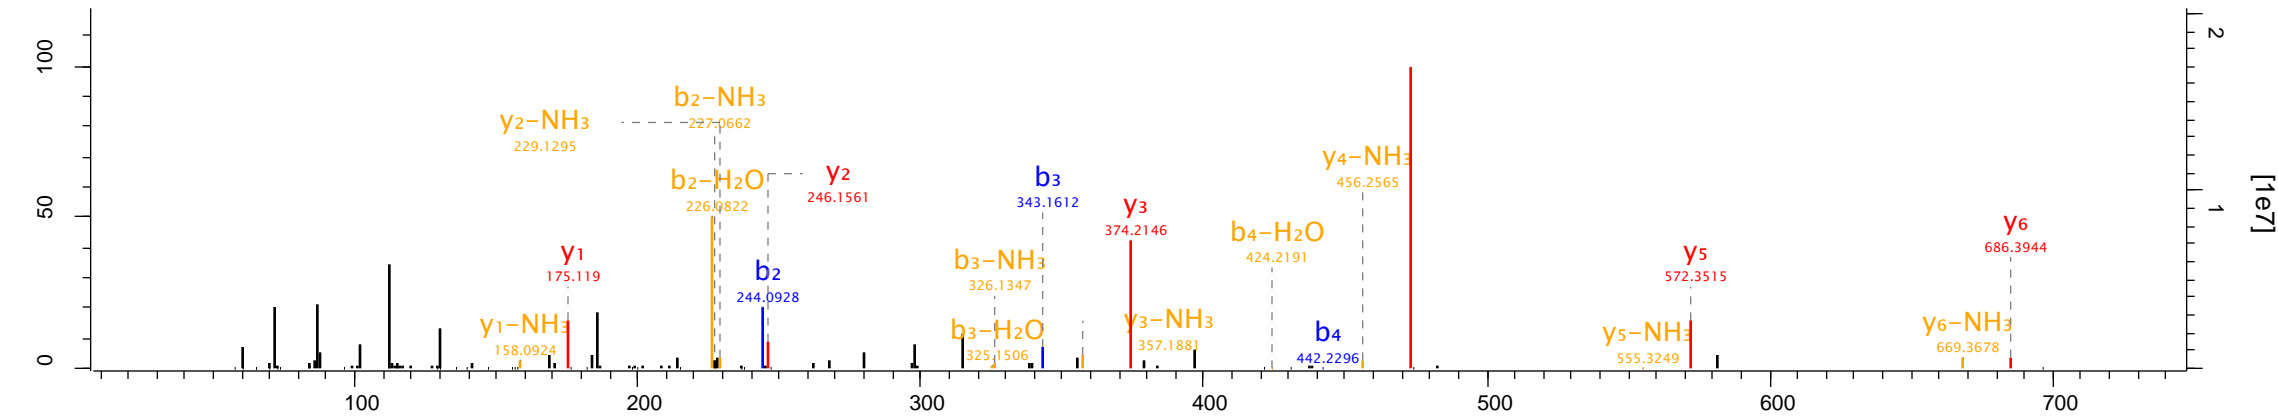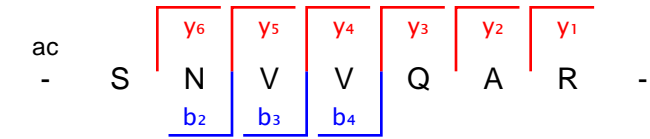

Raw file 20140602\_QEp4\_FaHo\_SA\_SPT7\_01 Scan 3448 Method FTMS; HCD Score 210.73 m/z 670.87 Gene names RPS14B;RPS14A

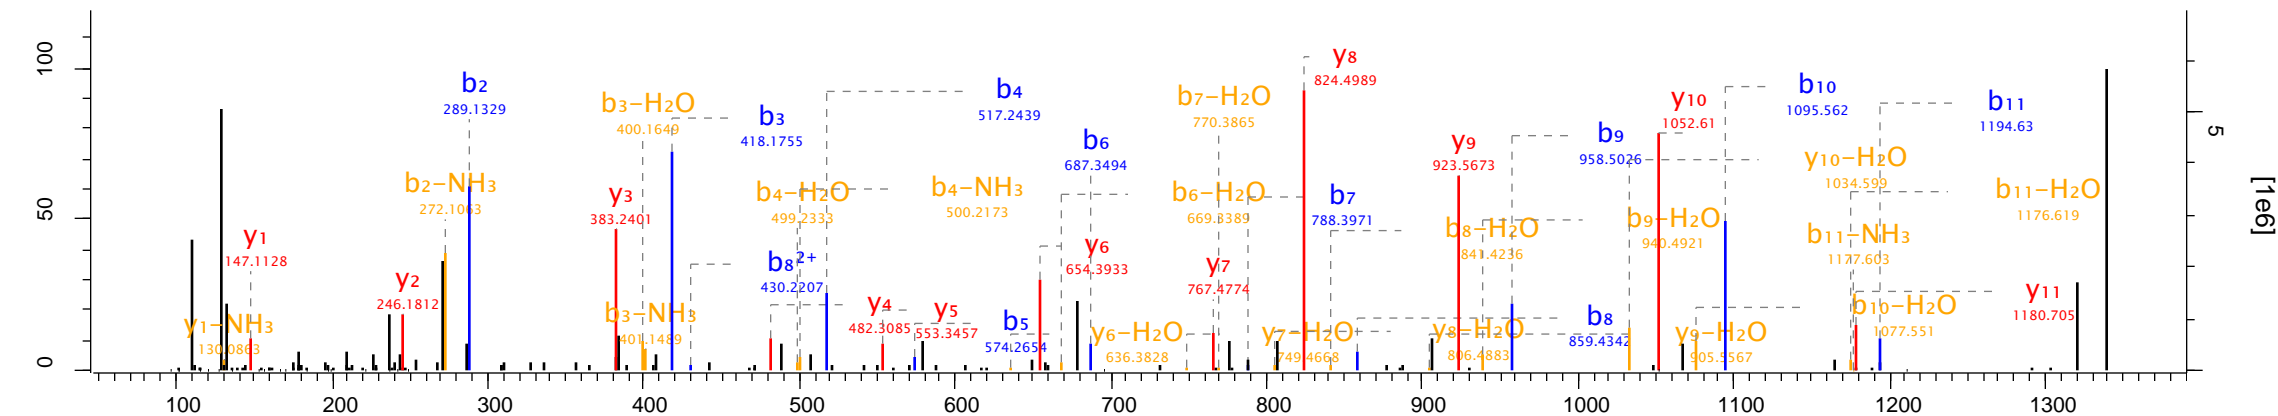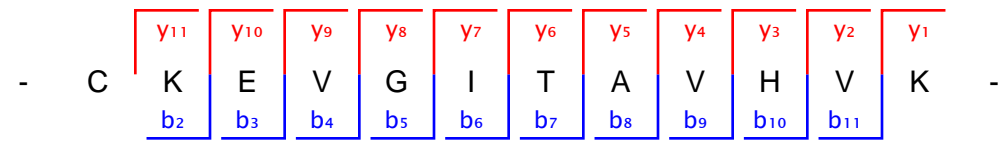

Raw file Scan Method Score m/z Gene names

20140602\_QEp4\_FaHo\_SA\_S 66Q1 FTMS; 201.3 821.4 TY1B-ML1;TY1B-BR;TY1B-H;TY1B-MR2;TY1B-OR;TY1B-DR1;TY1B-PR2;TY1B-DR5;TY1B-PR1;TY1B-JR2;TY1B-OL;TY1B-LR4;TY1B-ML2;TY1B-DR3;TY1B-PR3;TY1B-P

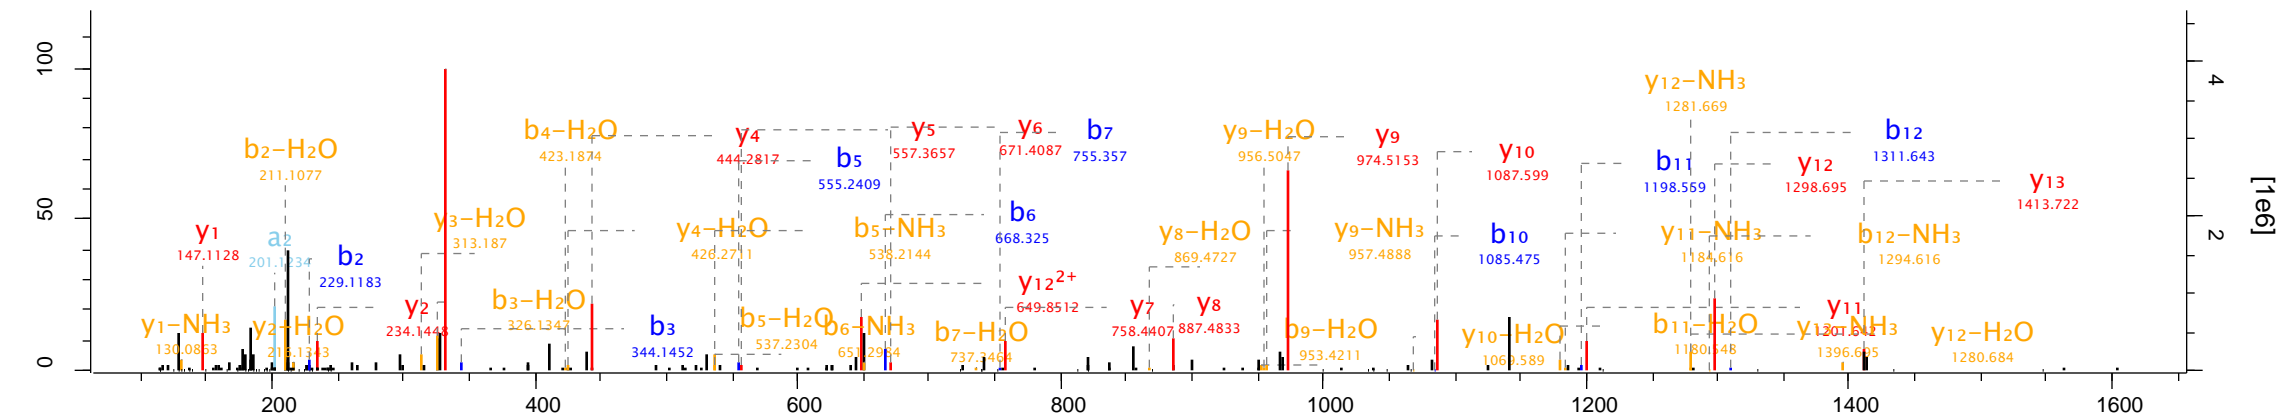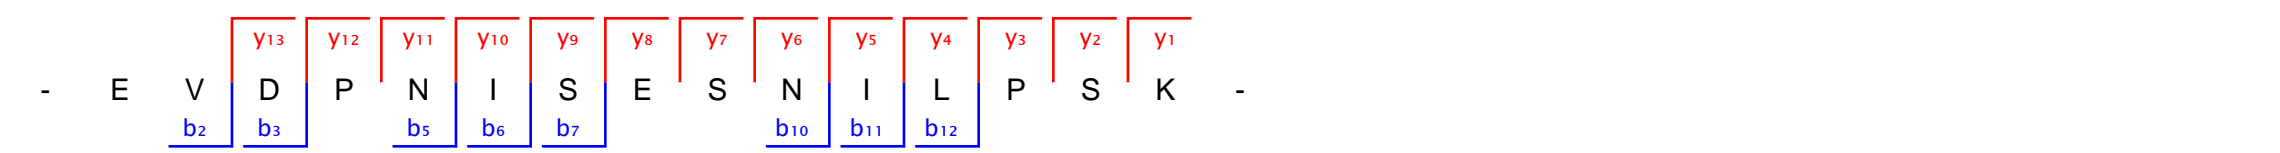

Raw file Scan Method Score m/z Gene names

20140602\_QEp4\_FaHo\_SA\_SPT7\_01 6704 FTMS; HCD 89.86 650.34 SLA1

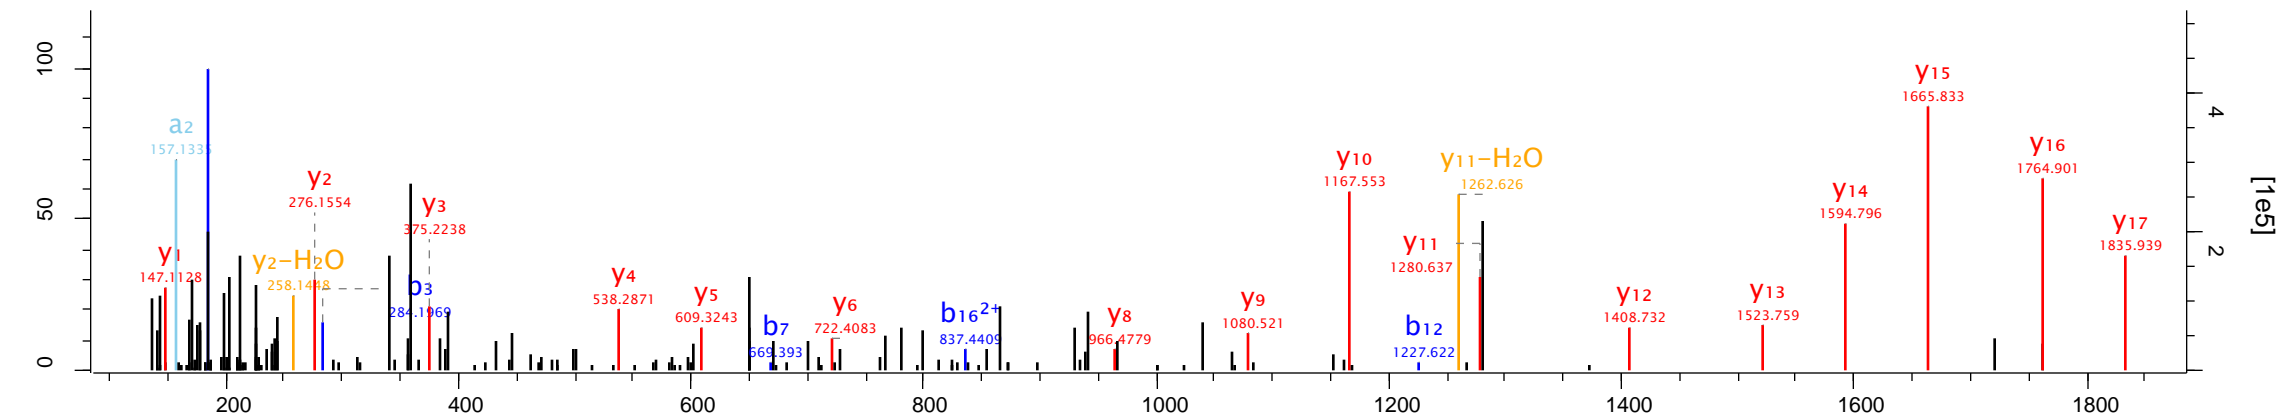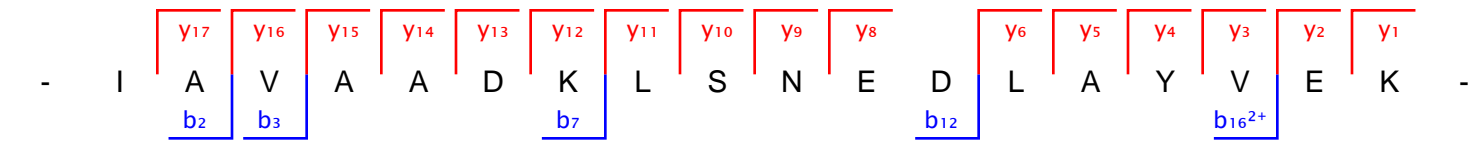

Raw file Scan Method Score m/z Gene names

20140602\_QEp4\_FaHo\_SA\_SPT7\_01 7128 FTMS; HCD 90.7 516.26 PAM16

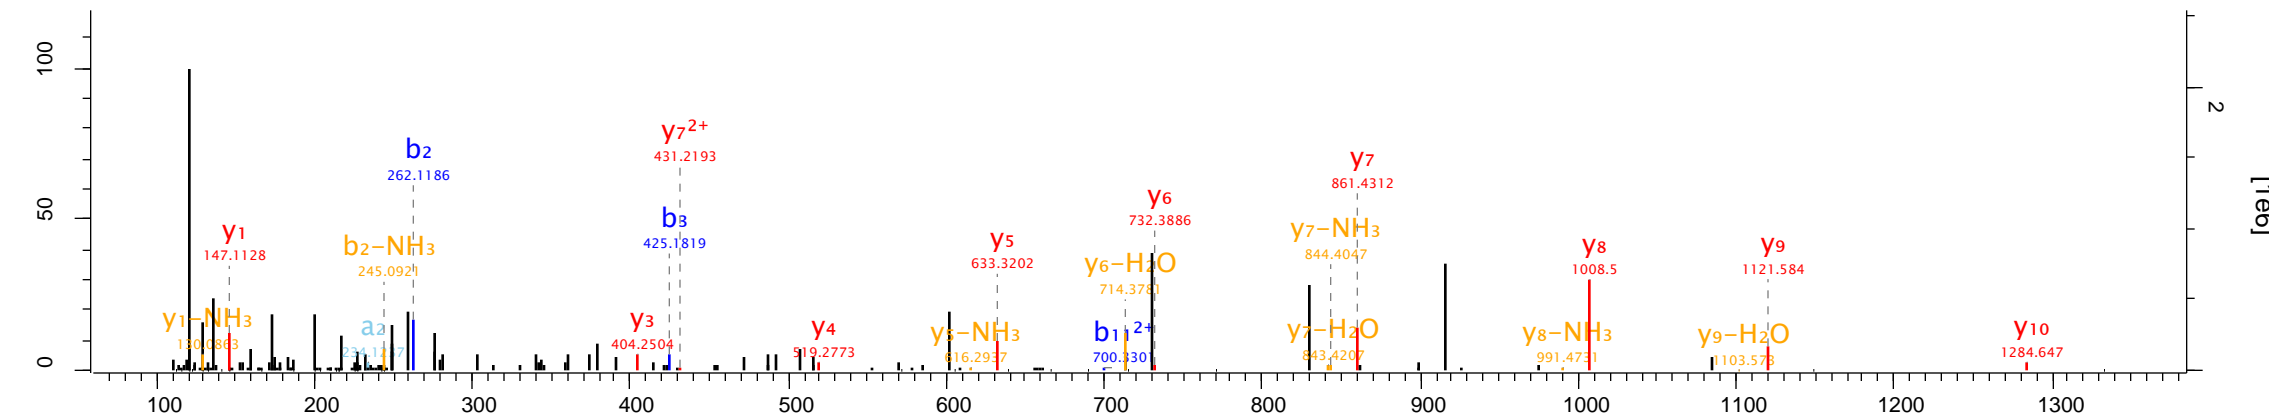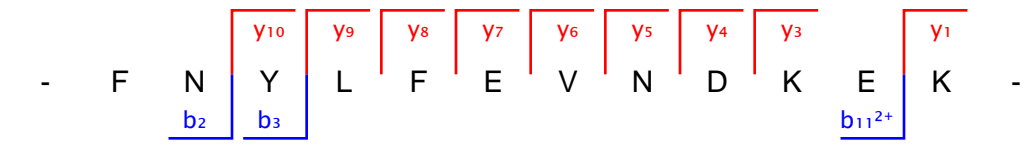

Raw file Scan Method Score m/z Gene names

20140602\_QEp4\_FaHo\_SA\_SPT7\_01 9483 FTMS; HCD 66.89 509.03 NAB6

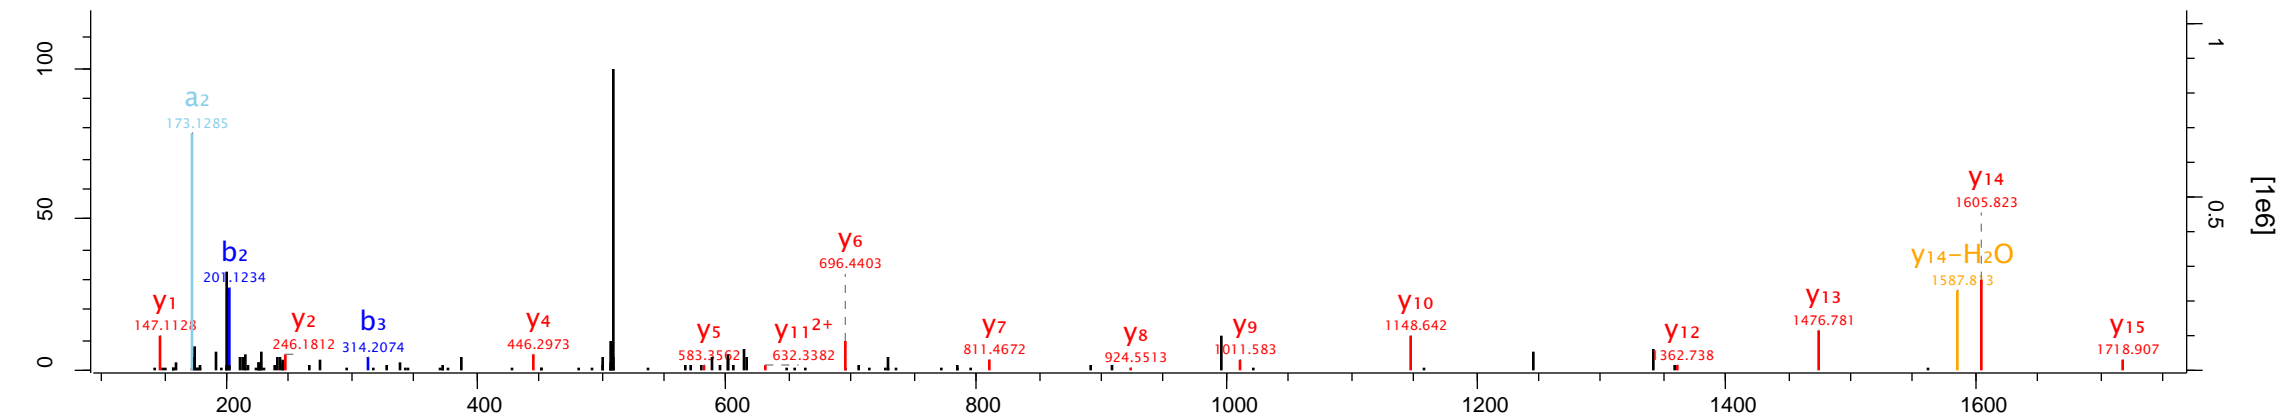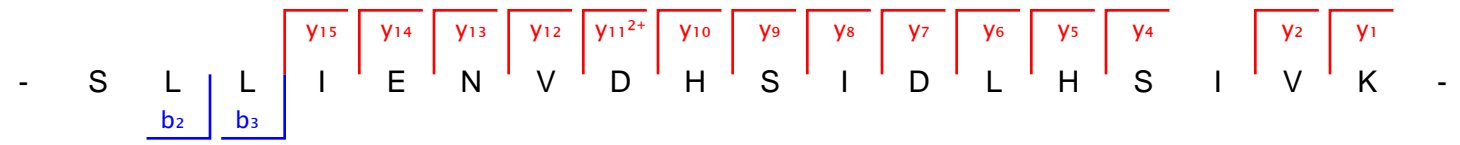

Raw file Scan Method Score m/z Gene names

20140602\_QEp4\_FaHo\_SA\_SPT7\_02 3850 FTMS; HCD 91.07 482.75 TRX2;TRX1

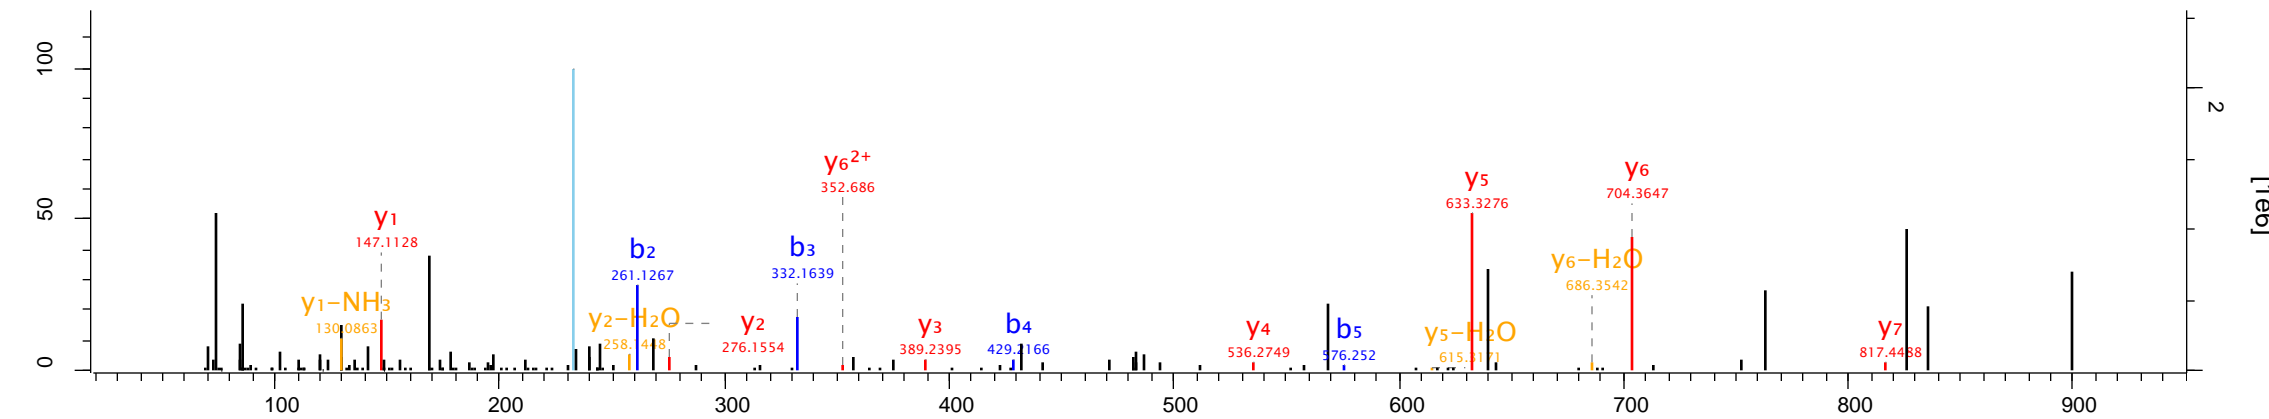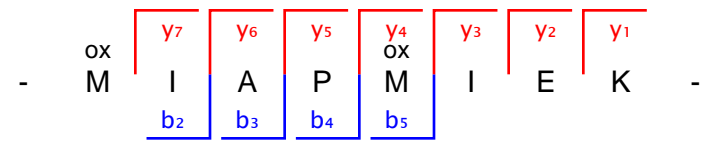



| Raw file                      | Scan | Method    | Score | m/z    | Gene names  |
|-------------------------------|------|-----------|-------|--------|-------------|
| 20140602_QEp4_FaHo_SA_SPT7_02 | 5309 | FTMS; HCD | 79.47 | 456.78 | RPS0B;RPS0A |

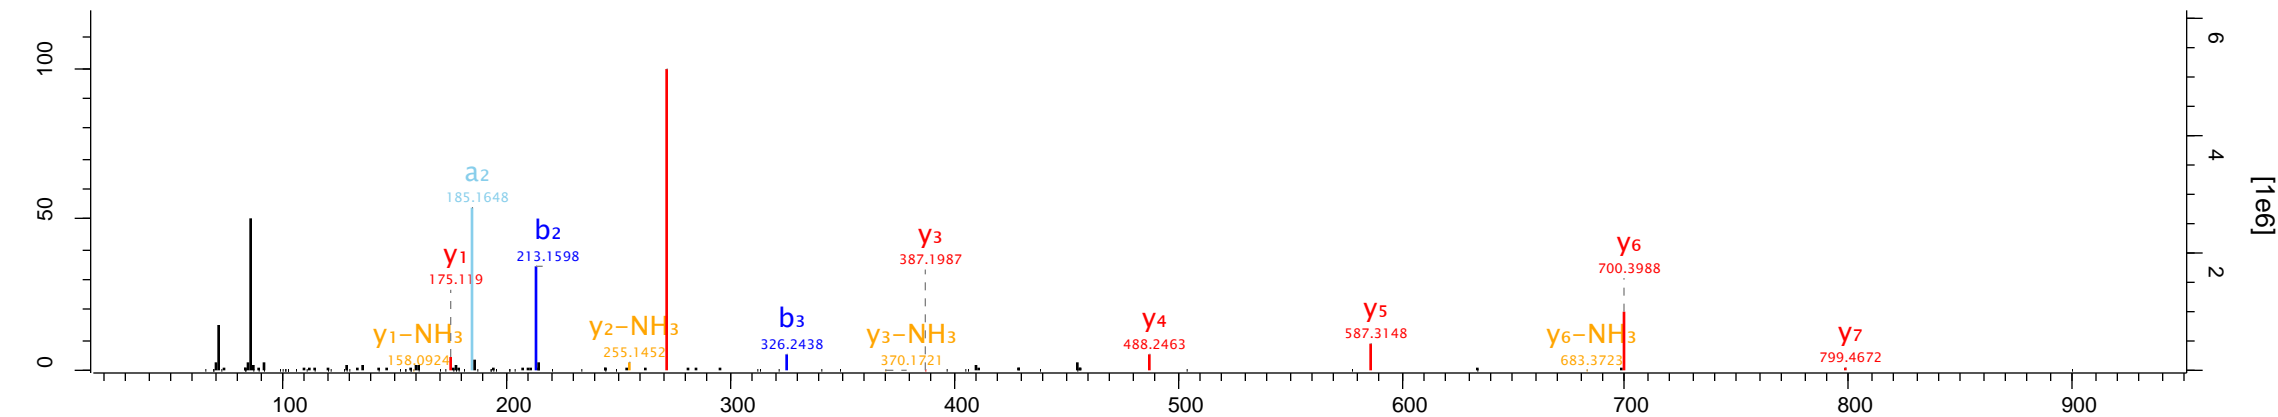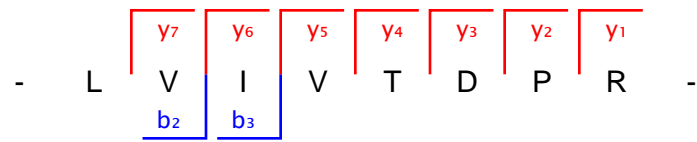

20140602\_QEp4\_FaHo\_S/85# FTMS; 64.7(401.); TY1B-ML1;TY1B-H;TY1B-MR2;TY1B-DR1;TY1B-NL2;TY1B-PR2;TY1B-DR5;TY1B-PR1;TY2B-C;TY1B-OL;TY1B-ML2;TY1B-DR3;TY1B-PR3;TY1B-PL;TY1B-LR2;TY1B-A;TY2B-

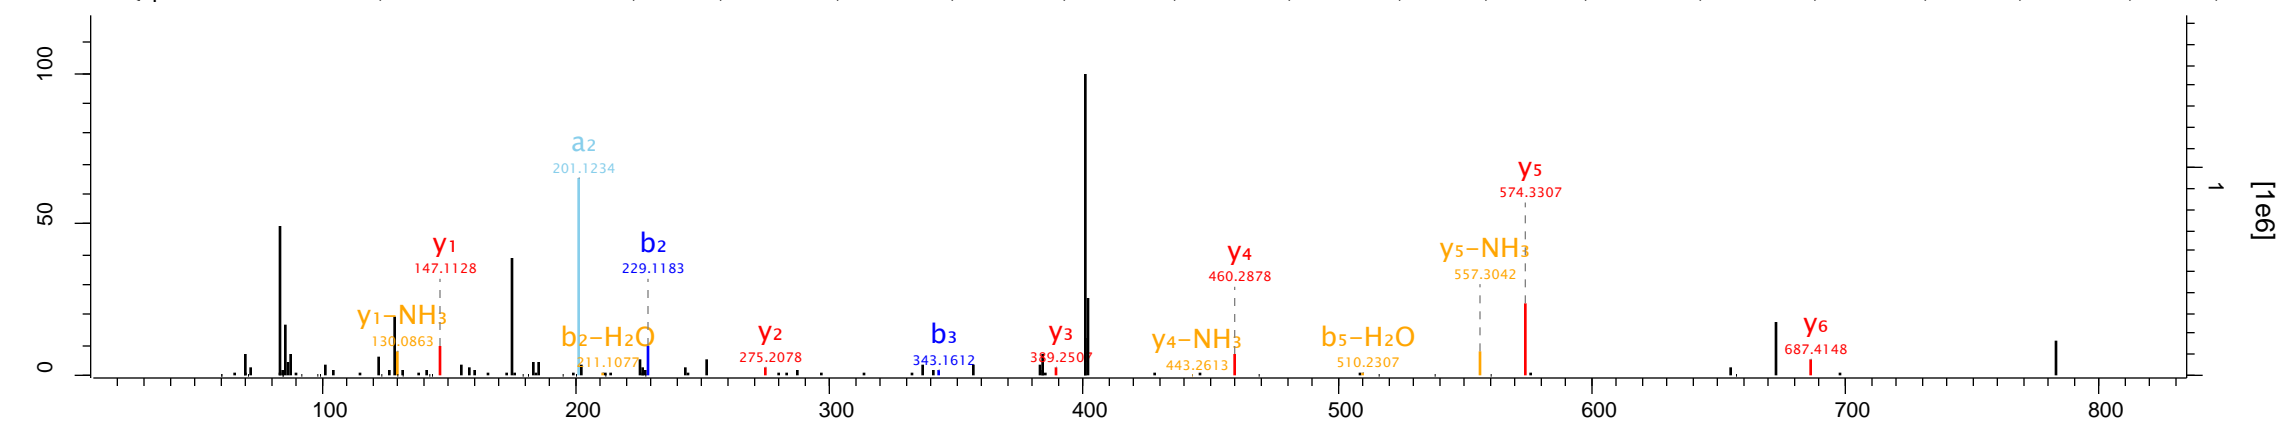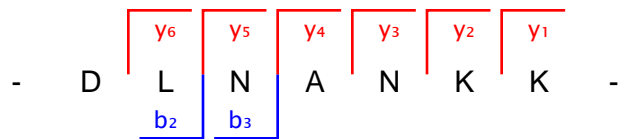

| Raw file                      | Scan | Method    | Score | m/z    | Gene names    |
|-------------------------------|------|-----------|-------|--------|---------------|
| 20140602_QEp4_FaHo_SA_SPT7_03 | 1668 | FTMS; HCD | 155   | 502.75 | RPL13B;RPL13A |

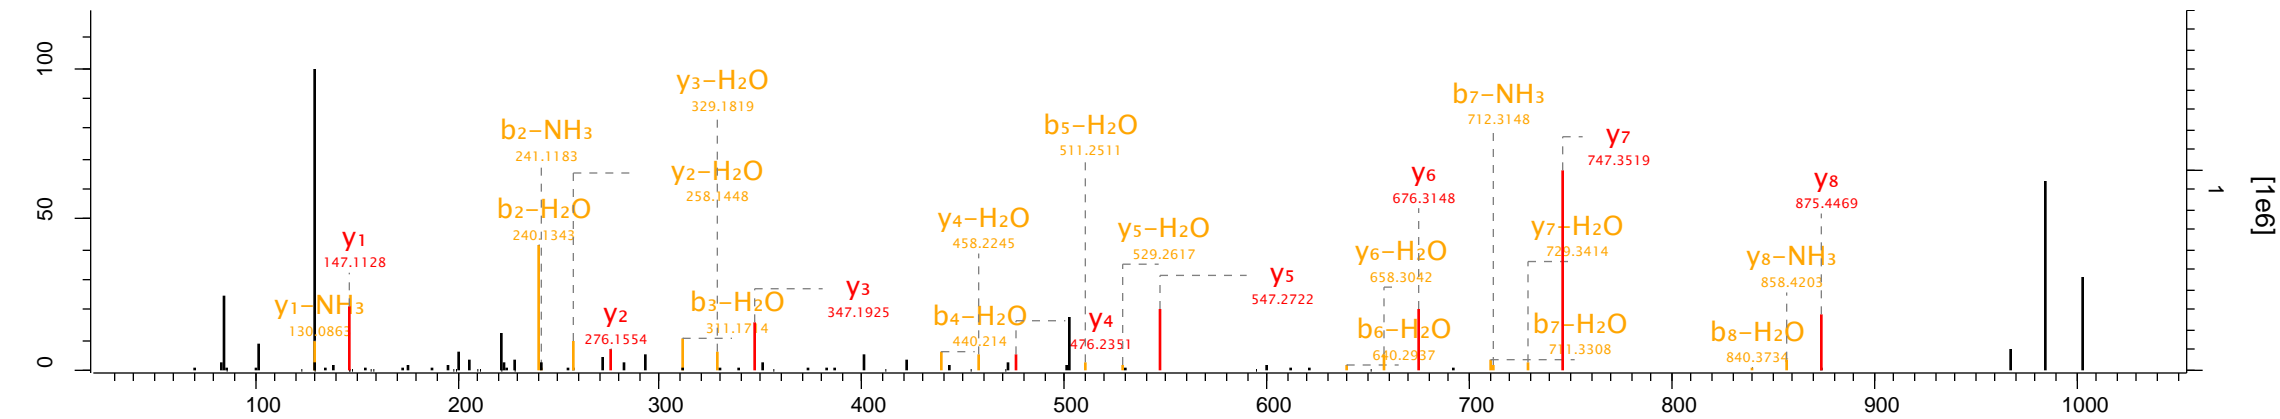

- E K A E A E A E K -

y8
y7
y6
y5
y4
y3
y2
y1

Raw file

Scan

Method

Score

m/z

Gene names

20140602\_QEp4\_FaHo\_SA\_SPT7\_03

1894

FTMS; HCD

89.89

521.76

TY1B-ML1;TY1B-H;TY1B-PR2;TY1B-DR5;TY1B-PR1;TY1B-OL;TY1B-ML2;TY1B-PR3;TY1B-PL;TY1B-LR2;TY1B-A

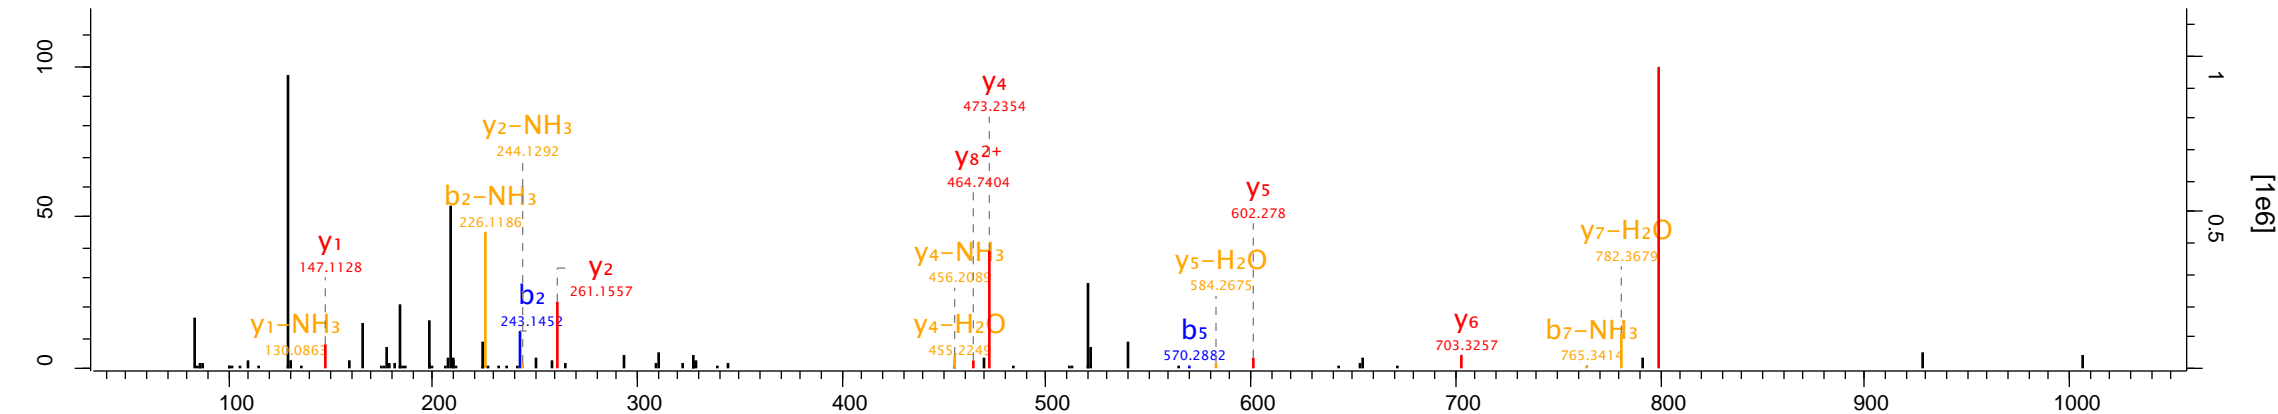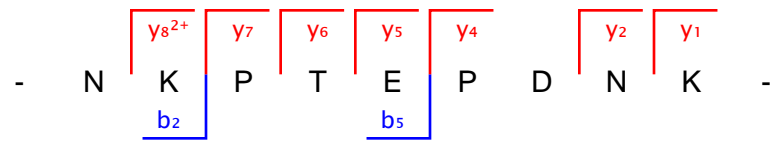

Raw file Scan Method Score m/z Gene names  
 20140602\_QEp4\_FaHo\_SA\_SPT7\_03 5516 FTMS; HCD 193.54 812.42 TY1A-PL;TY1A-LR2;TY1A-ER1;TY1A-DR6

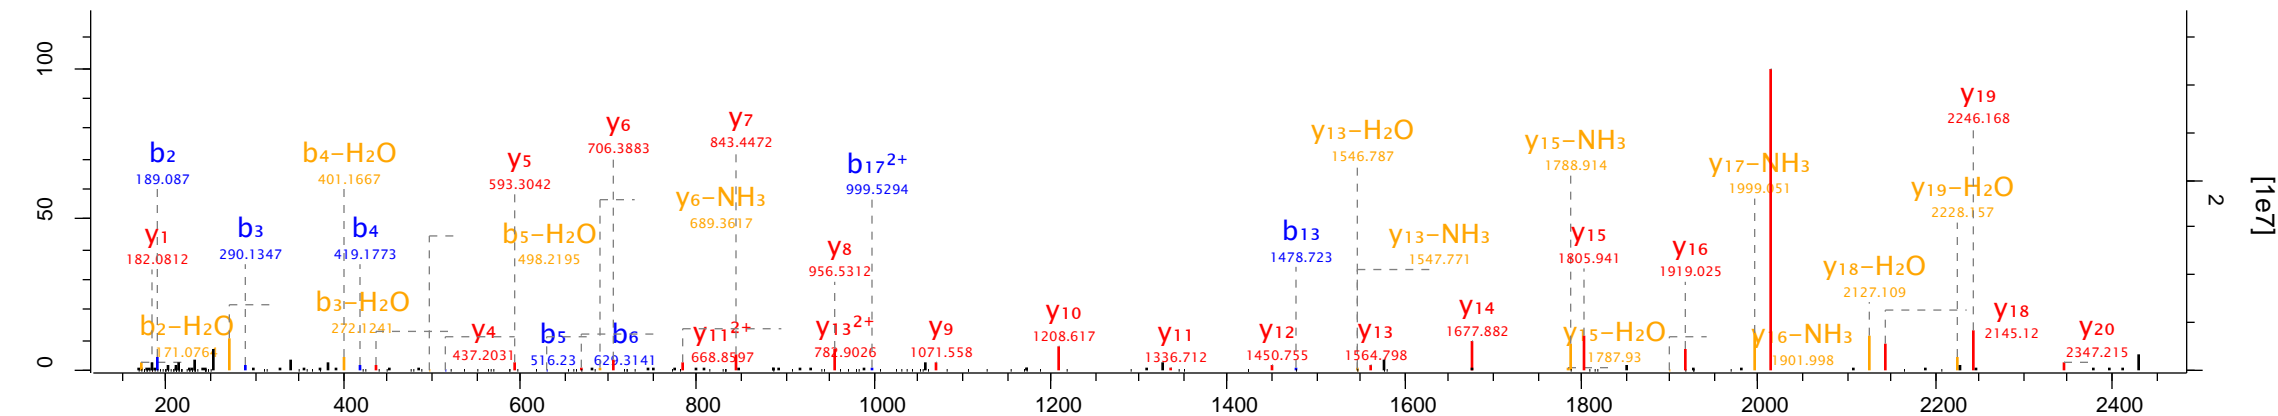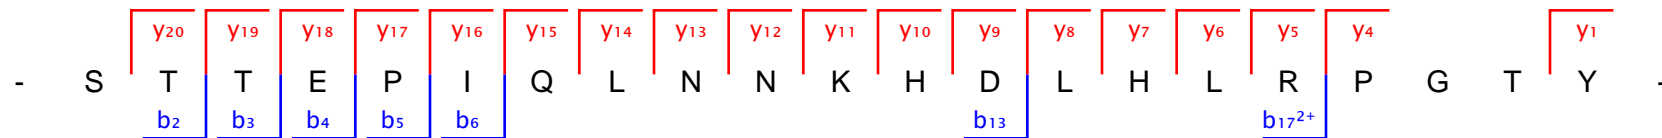

| Raw file                      | Scan | Method    | Score  | m/z    | Gene names  |
|-------------------------------|------|-----------|--------|--------|-------------|
| 20140602_QEp4_FaHo_SA_SPT7_03 | 9232 | FTMS; HCD | 154.72 | 602.66 | RPL9A;RPL9B |

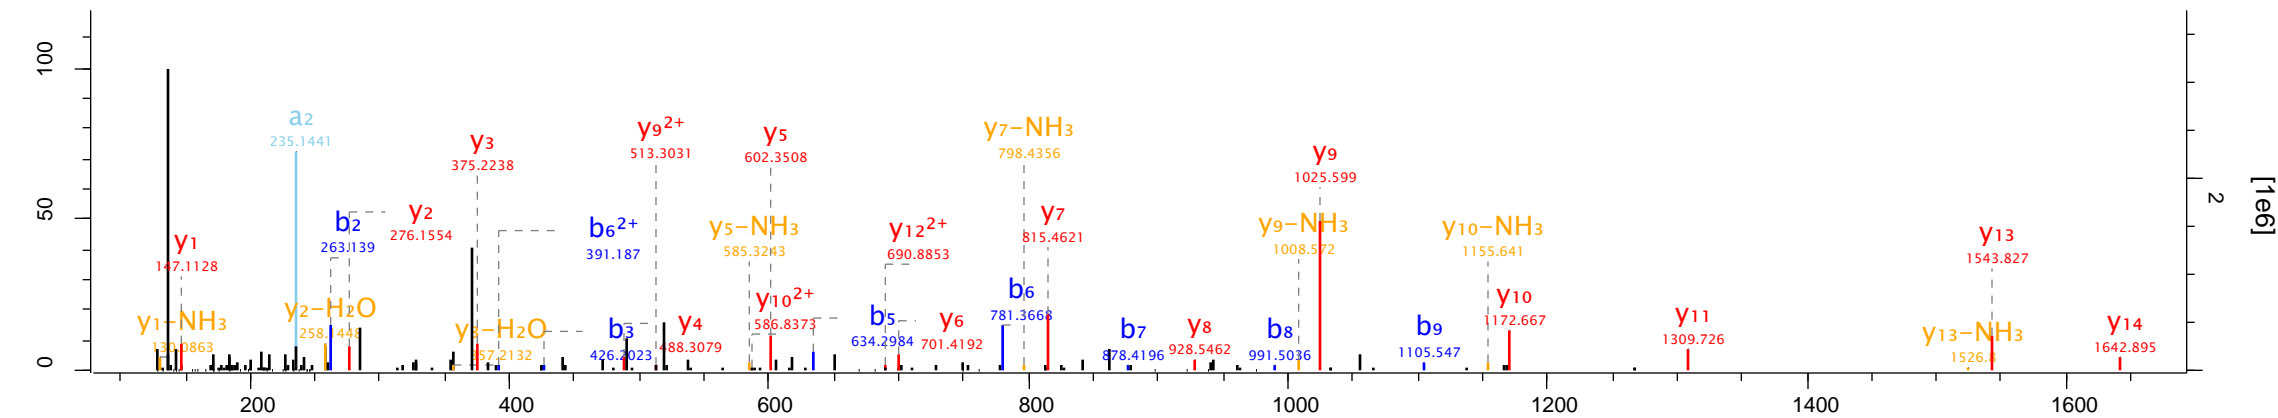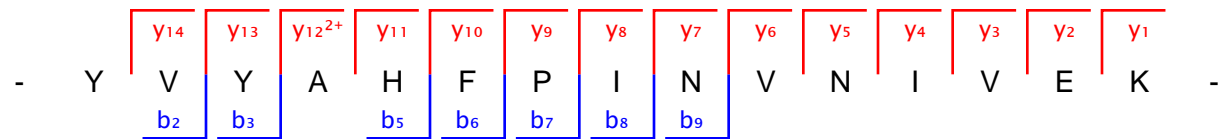

Raw file Scan Method Score m/z Gene names

20140602\_QEp4\_FaHo\_SA\_SPT7\_03 9256 FTMS; HCD 171.08 1035.51 RPC19

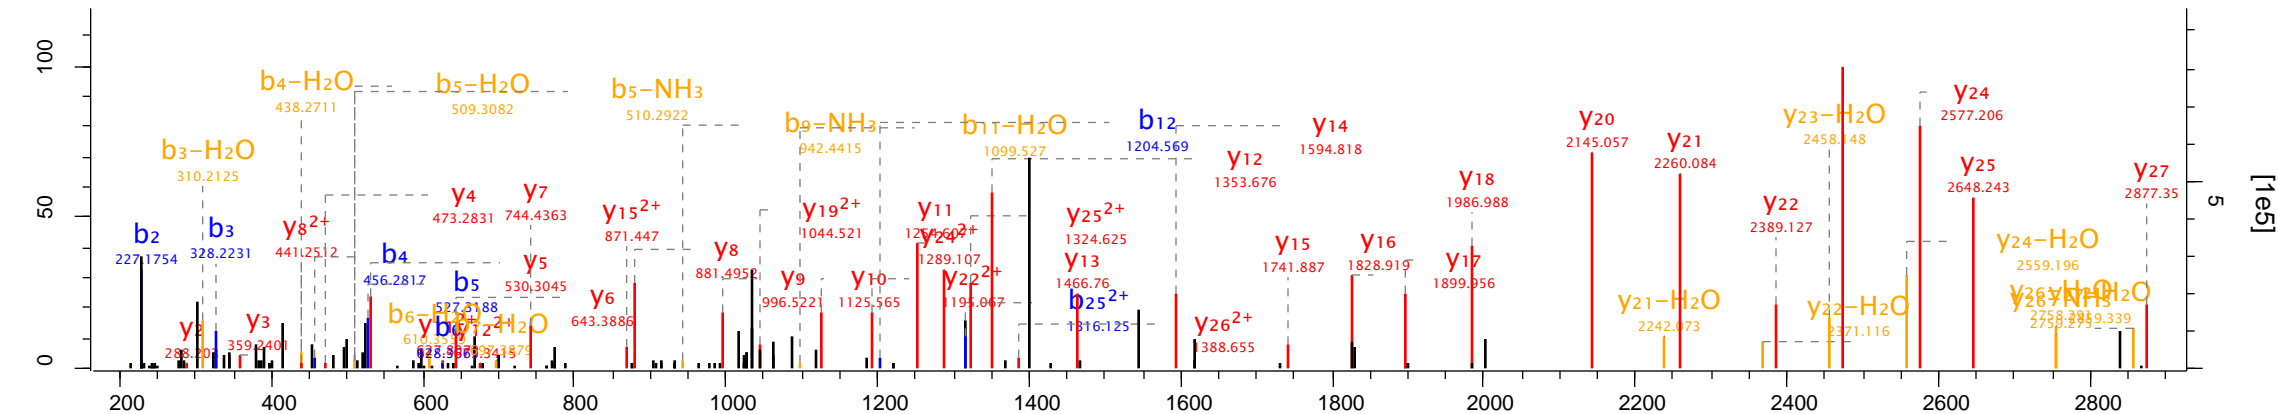

- L L T Q A T S E D G T S A S F Q I V E E D H T L G N A L

b<sub>2</sub> b<sub>3</sub> b<sub>4</sub> b<sub>5</sub> b<sub>6</sub> b<sub>12</sub> b<sub>25</sub><sup>2+</sup> y<sub>27</sub> y<sub>26</sub><sup>2+</sup> y<sub>25</sub> y<sub>24</sub> y<sub>23</sub> y<sub>22</sub> y<sub>21</sub> y<sub>20</sub> y<sub>19</sub><sup>2+</sup> y<sub>18</sub> y<sub>17</sub> y<sub>16</sub> y<sub>15</sub> y<sub>14</sub> y<sub>13</sub> y<sub>12</sub> y<sub>11</sub> y<sub>10</sub> y<sub>9</sub> y<sub>8</sub> y<sub>7</sub> y<sub>6</sub> y<sub>5</sub> y<sub>4</sub> y<sub>3</sub> y<sub>2</sub>

Raw file

Scan

Method

Score

m/z

Gene names

20140602\_QEp4\_FaHo\_SA\_SPT7\_03

9370

FTMS; HCD

254.68

880.97

TY1B-NL1;TY1A-DR2;TY1B-BL;TY1B-MR1;TY1A-MR1

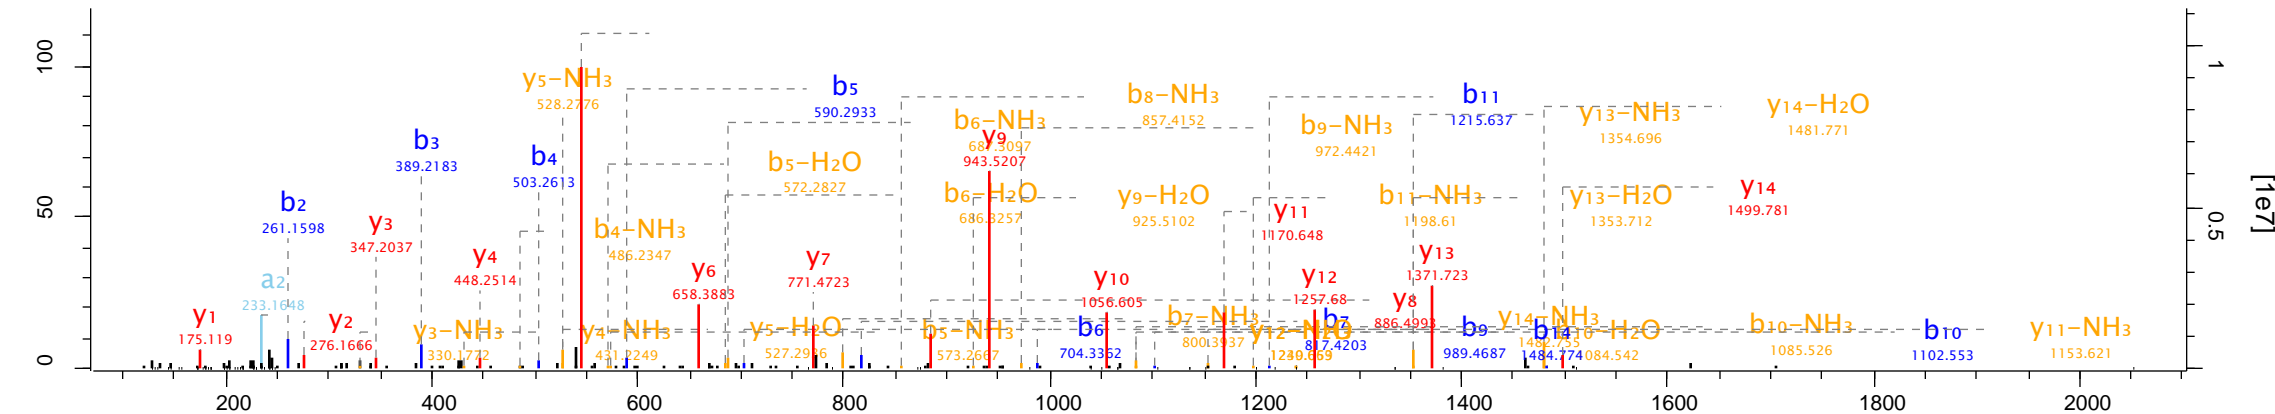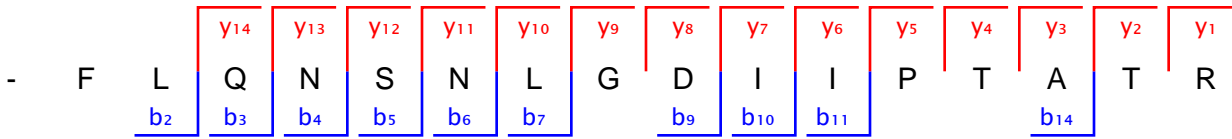



| Raw file                      | Scan | Method    | Score  | m/z    | Gene names  |
|-------------------------------|------|-----------|--------|--------|-------------|
| 20140602_QEp4_FaHo_SA_SPT7_03 | 9536 | FTMS; HCD | 122.46 | 997.01 | RPL7A;RPL7B |

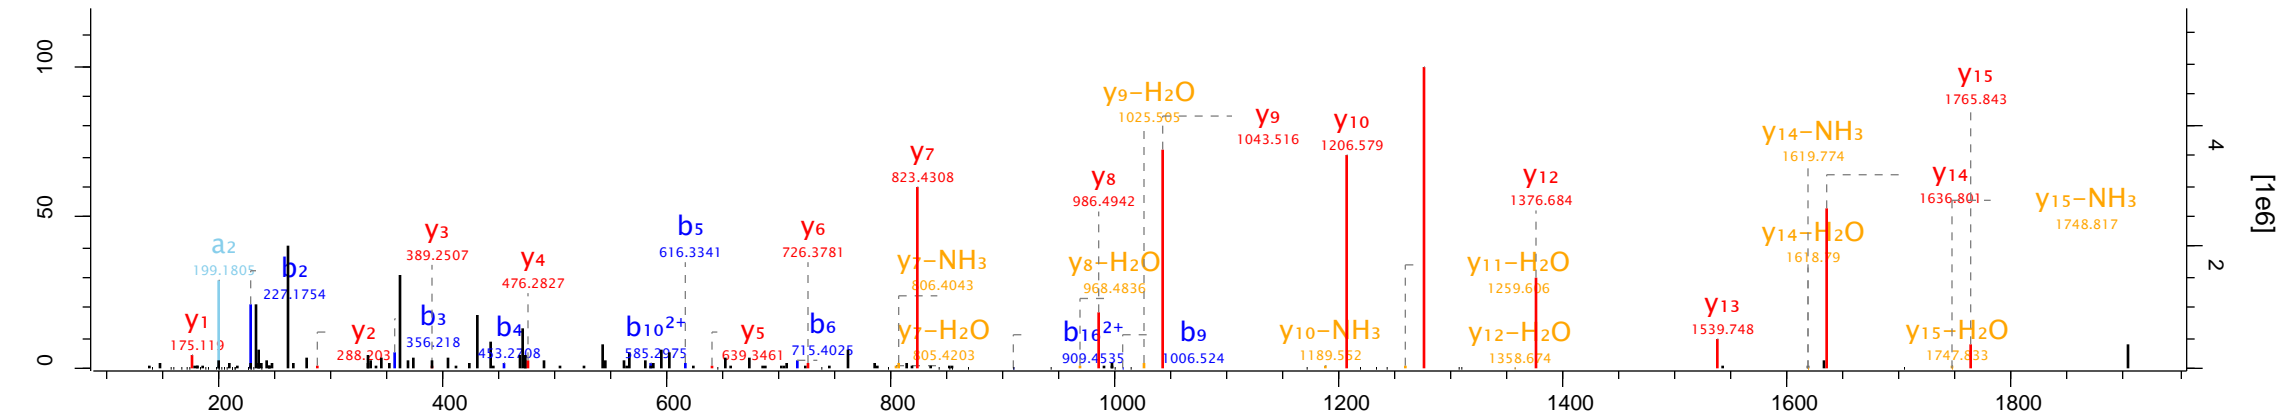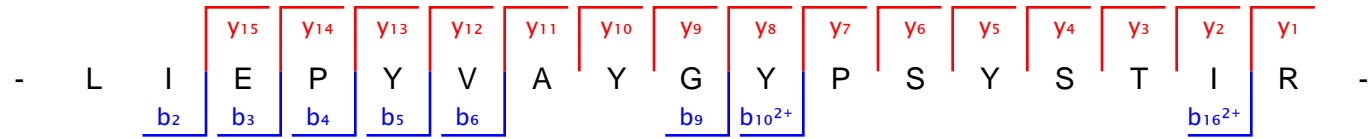

Raw file Scan Method Score m/z  
 20140602\_QEp4\_FaHo\_SA\_STH1\_01 2343 FTMS; HCD 114.02 367.21

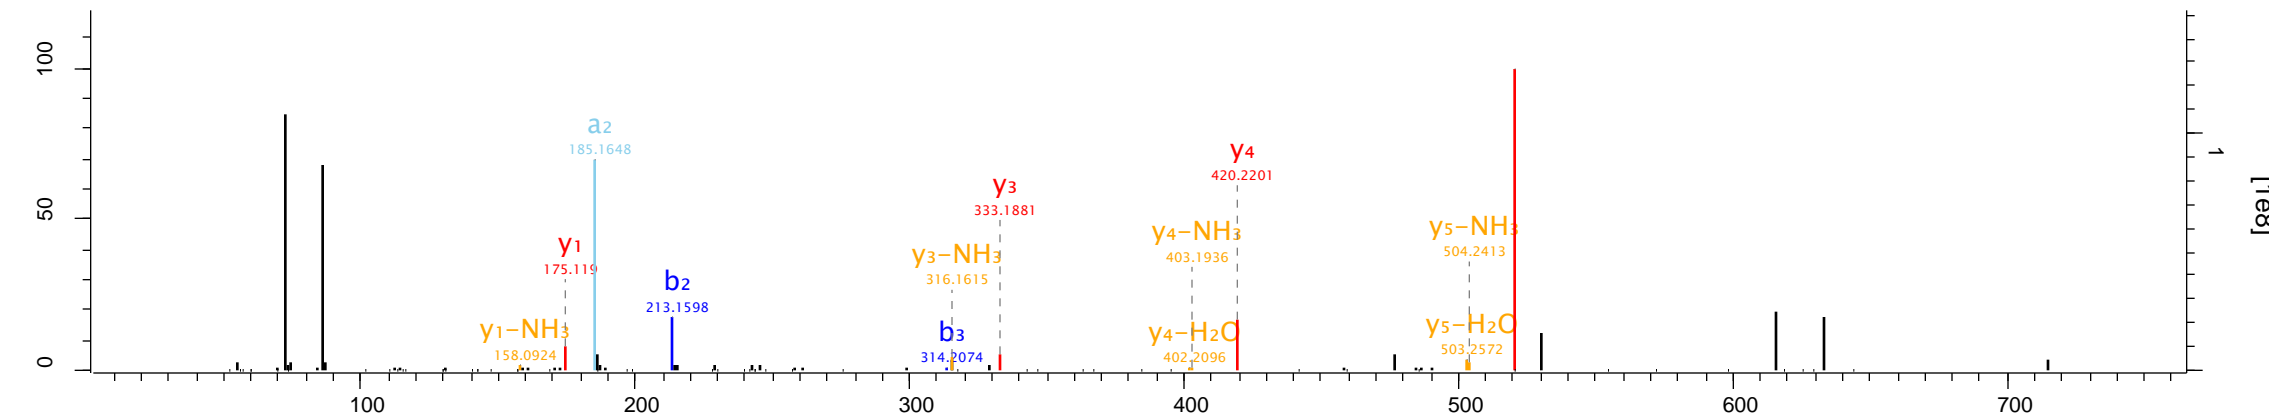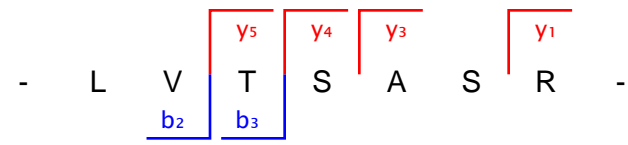

| Raw file                      | Scan | Method    | Score  | m/z    | Gene names    |
|-------------------------------|------|-----------|--------|--------|---------------|
| 20140602_QEp4_FaHo_SA_STH1_02 | 5230 | FTMS; HCD | 169.76 | 567.79 | RPL36B;RPL36A |

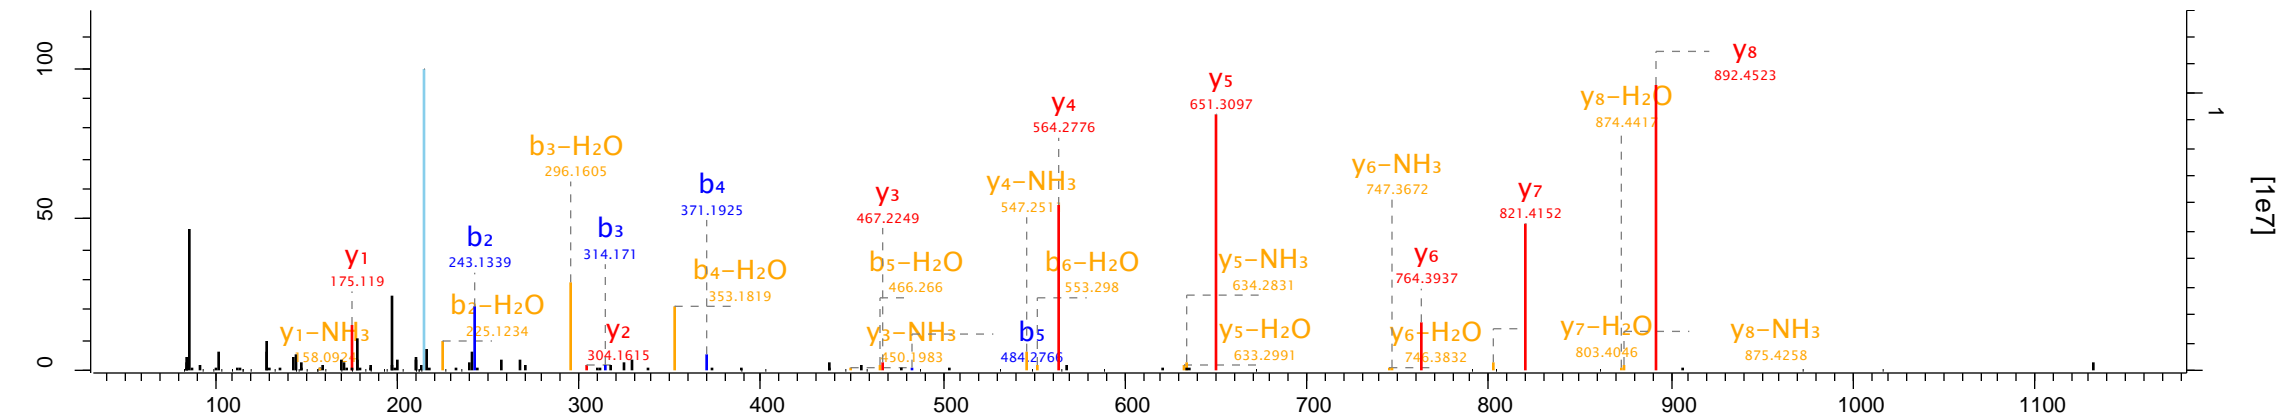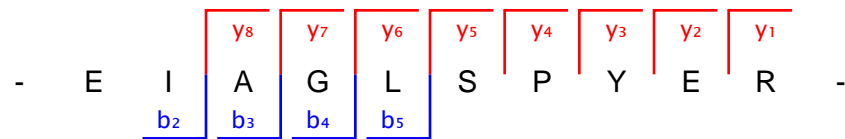

| Raw file                      | Scan | Method    | Score  | m/z    | Gene names    |
|-------------------------------|------|-----------|--------|--------|---------------|
| 20140602_QEp4_FaHo_SA_STH1_02 | 8369 | FTMS; HCD | 164.93 | 841.42 | RPS26A;RPS26B |

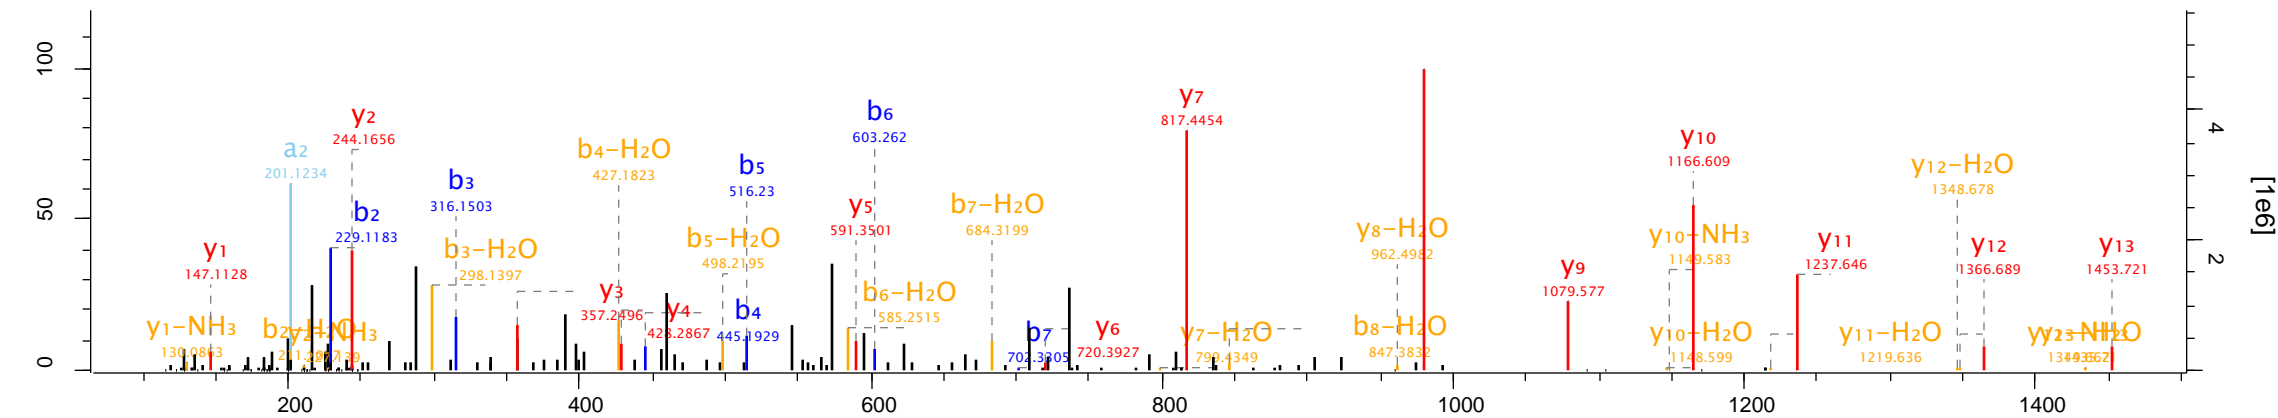

- D L S E A S V Y P E Y A L P K -

b<sub>2</sub> b<sub>3</sub> b<sub>4</sub> b<sub>5</sub> b<sub>6</sub> b<sub>7</sub>

y<sub>13</sub> y<sub>12</sub> y<sub>11</sub> y<sub>10</sub> y<sub>9</sub> y<sub>8</sub> y<sub>7</sub> y<sub>6</sub> y<sub>5</sub> y<sub>4</sub> y<sub>3</sub> y<sub>2</sub> y<sub>1</sub>

| Raw file                      | Scan | Method    | Score | m/z    | Gene names                                  |
|-------------------------------|------|-----------|-------|--------|---------------------------------------------|
| 20140602_QEp4_FaHo_SA_SWD3_01 | 1724 | FTMS; HCD | 83.78 | 351.86 | TY1B-NL1;TY1A-DR2;TY1B-BL;TY1B-MR1;TY1A-MR1 |

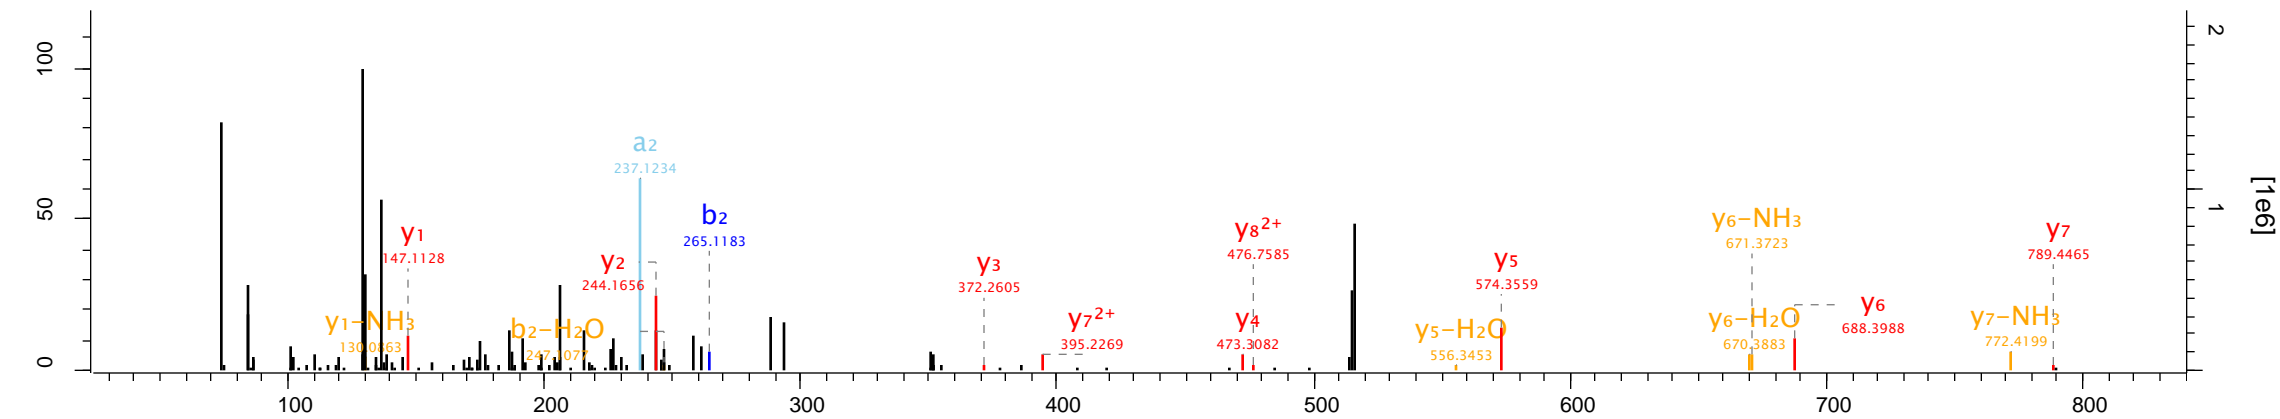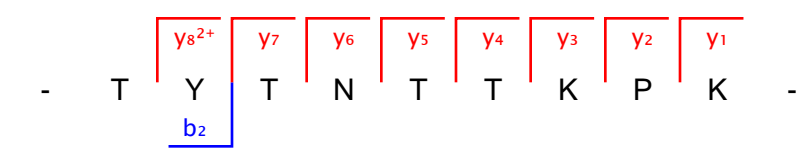

20140602\_QEp4\_FaHo\_SA\_44.D FTMS; 117.9 432.7 TY1B-ML1;TY1B-BR;TY1B-H;TY1B-MR2;TY1B-OR;TY1B-DR1;TY1B-NL2;TY1B-PR2;TY1B-DR5;TY1B-PR1;TY1B-JR2;TY1B-NL1;TY1B-OL;TY1B-LR4;TY1B-ML2;TY1B-DR3

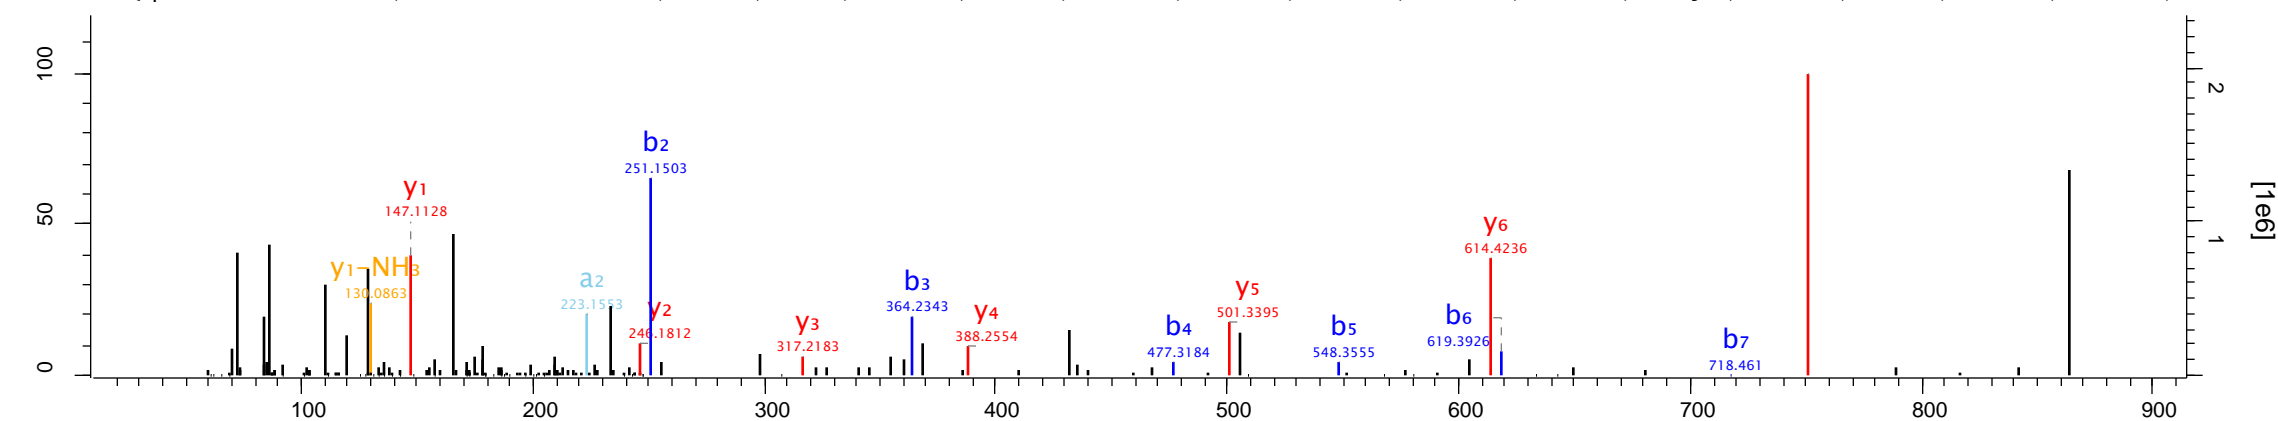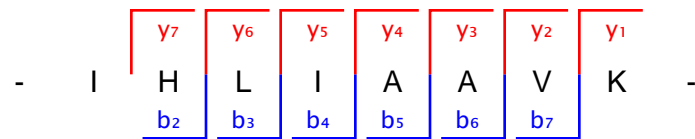

| Raw file                      | Scan | Method    | Score  | m/z    | Gene names    |
|-------------------------------|------|-----------|--------|--------|---------------|
| 20140602_QEp4_FaHo_SA_SWD3_01 | 5241 | FTMS; HCD | 114.64 | 443.77 | RPL36B;RPL36A |

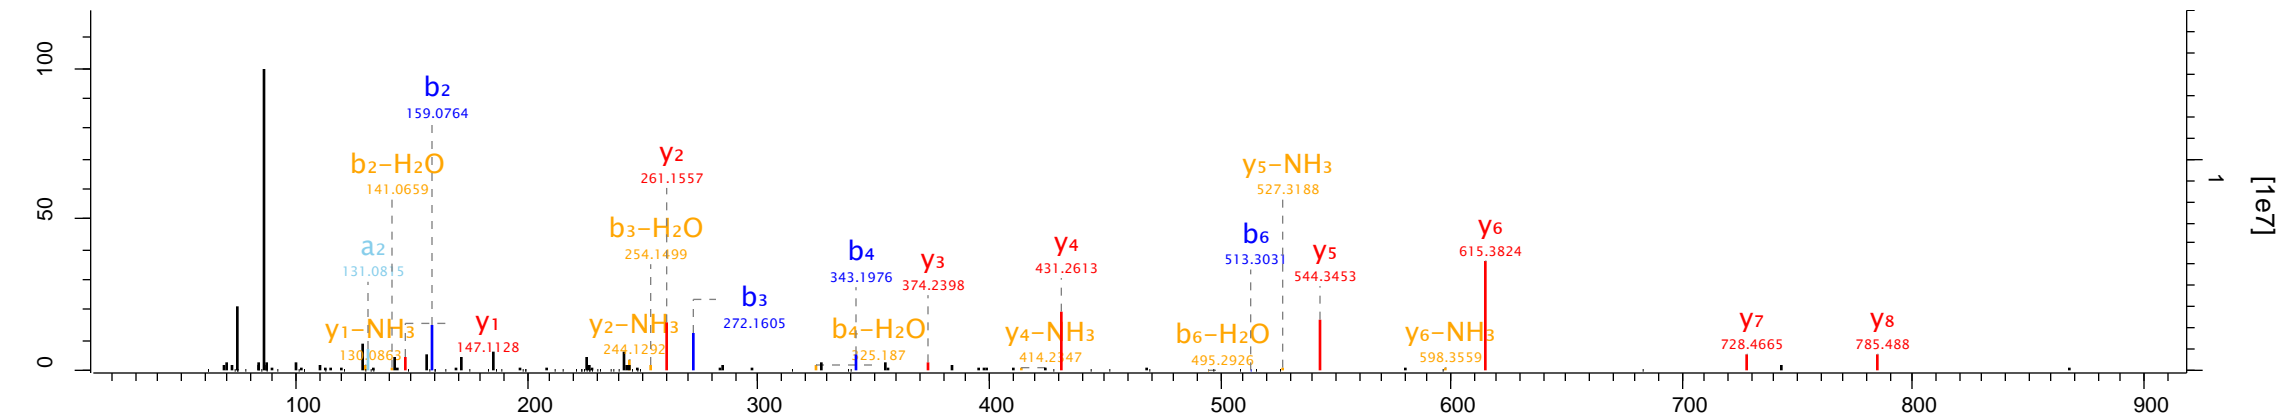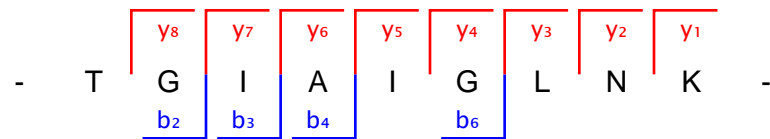

Raw file

Scan Method Score m/z Gene names

20140602\_QEp4\_FaHo\_SA\_SWD3\_02

2056 FTMS; HCD 240.78 589.28 TY1A-PL;TY1A-LR2;TY1A-ER1;TY1A-DR6;TY1B-OL;TY1B-LR4;TY1B-ML2;TY1B-PR3;TY1B-PL;TY1B-LR2;TY1B-DR6

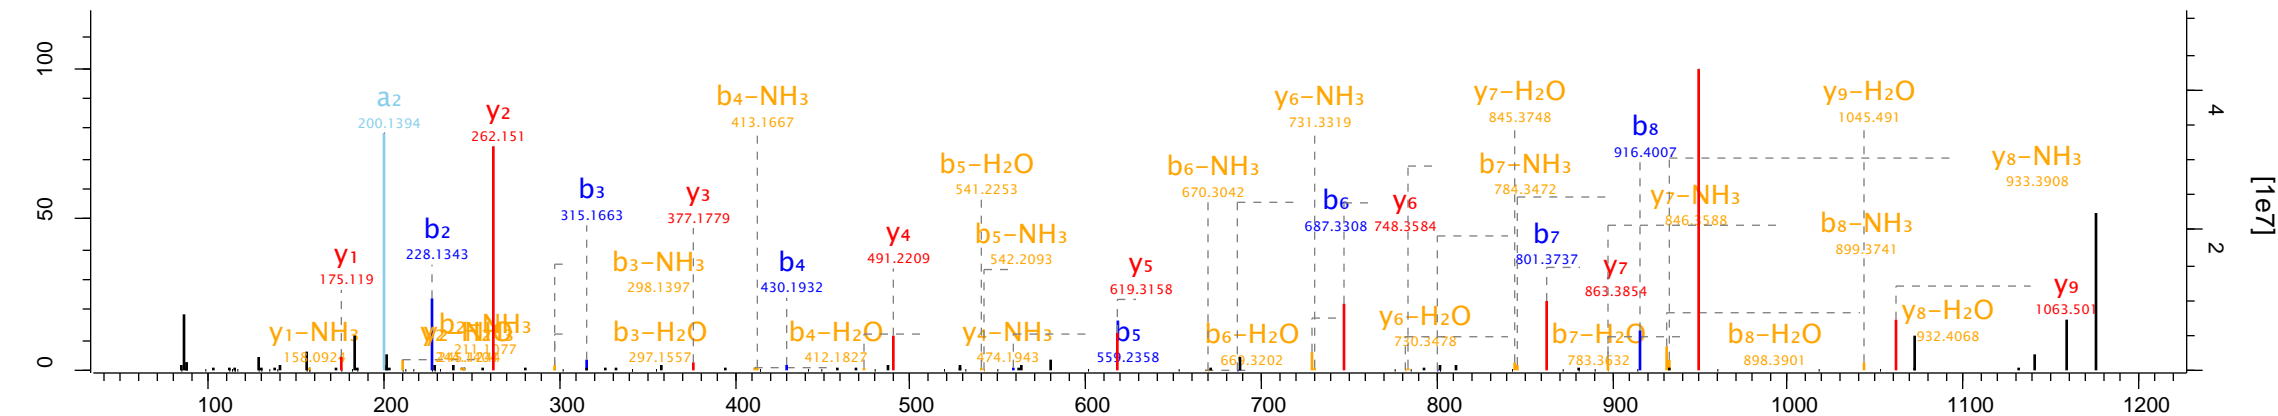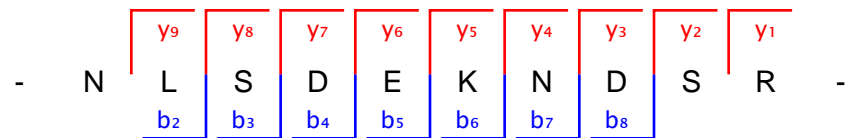



20140602\_QEp4\_FaHo\_956 FTMS; 294.2 886.1 TY1B-ML1;TY1B-BR;TY1A-PR1;TY1A-A;TY1A-DR4;TY1B-H;TY1B-MR2;TY1B-OR;TY1B-DR1;TY1B-NL2;TY1B-PR2;TY1B-DR5;TY1B-PR1;TY1B-JR2;TY1A-PL;TY1A-LR2;TY1A-E

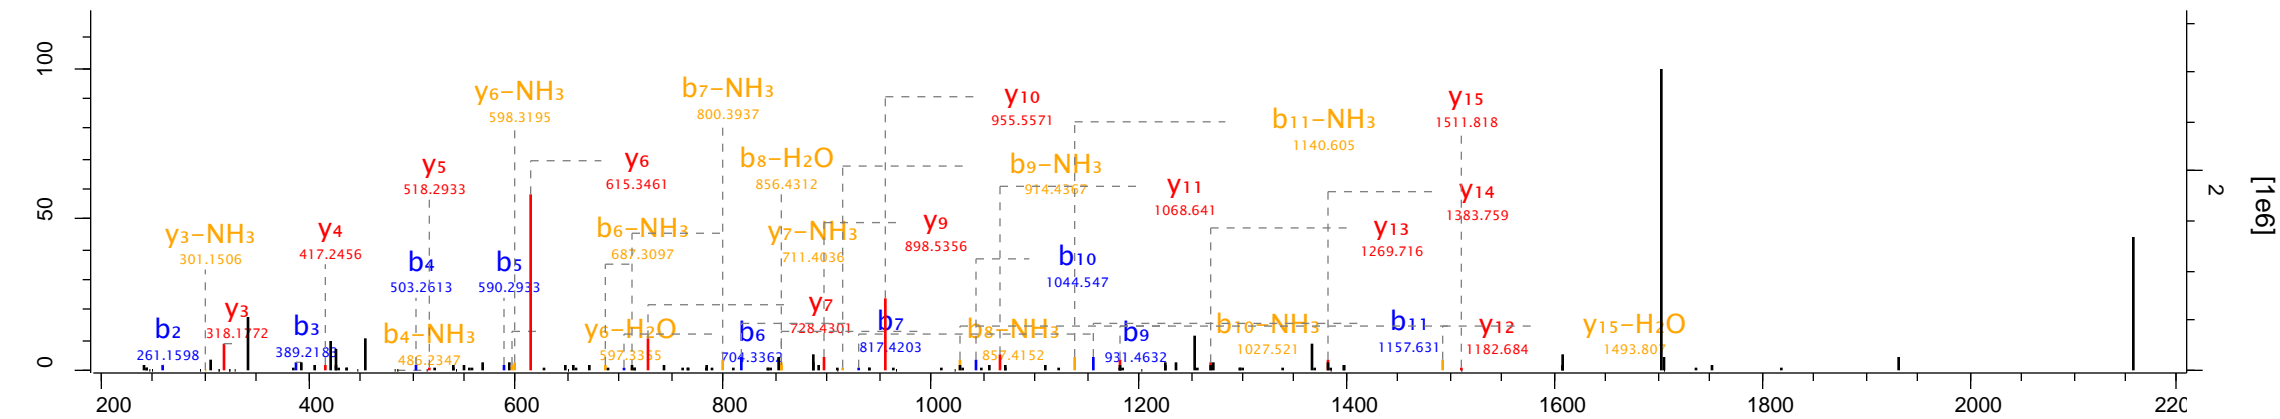

- F L Q N S N L G G I I P T V N G K -

b<sub>2</sub> b<sub>3</sub> b<sub>4</sub> b<sub>5</sub> b<sub>6</sub> b<sub>7</sub> b<sub>9</sub> b<sub>10</sub> b<sub>11</sub>

y<sub>15</sub> y<sub>14</sub> y<sub>13</sub> y<sub>12</sub> y<sub>11</sub> y<sub>10</sub> y<sub>9</sub> y<sub>7</sub> y<sub>6</sub> y<sub>5</sub> y<sub>4</sub> y<sub>3</sub>

Raw file Scan Method Score m/z Gene names

20140602\_QEp4\_FaHo\_SA\_SWD3.3061 FTMS; 163.51510.93 TY1B-ML1;TY1B-MR2;TY1B-OR;TY1B-DR1;TY1B-PR2;TY1B-DR5;TY1B-PR1;TY1B-JR2;TY1B-OL;TY1B-LR4;TY1B-ML2;TY1B-DR3;TY1B-PR3;TY1B-PL;TY1B-L

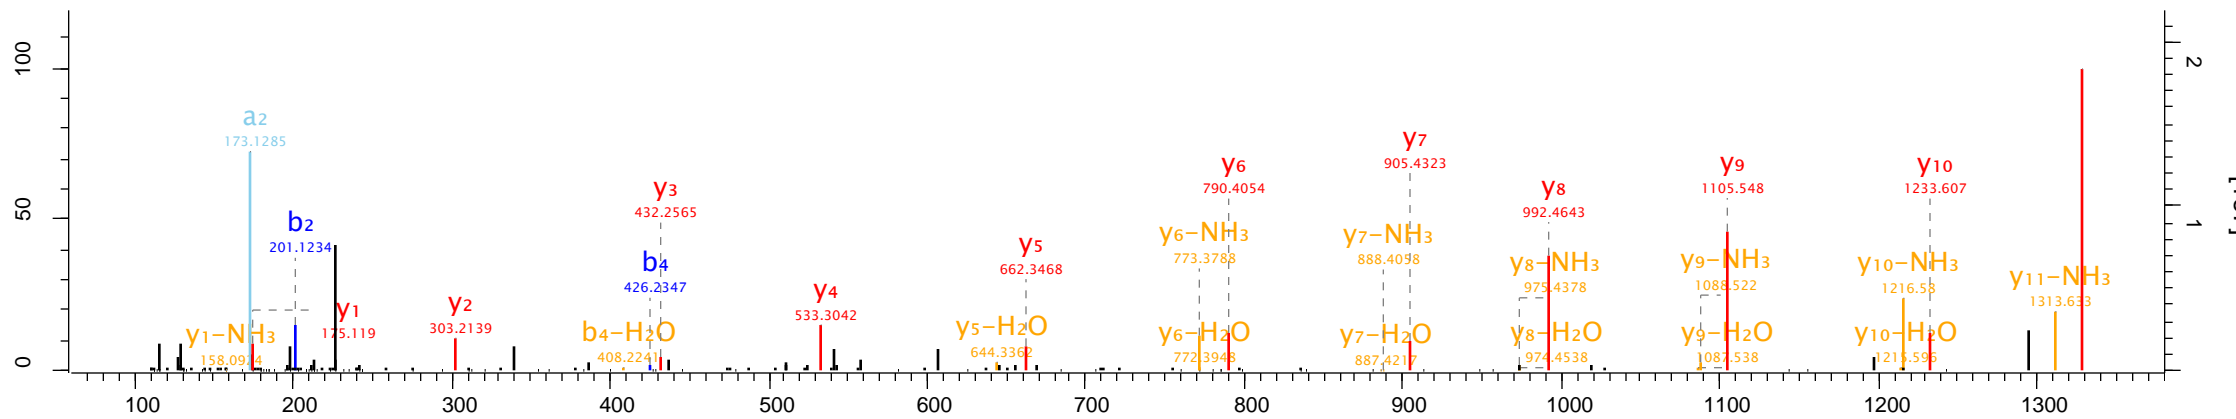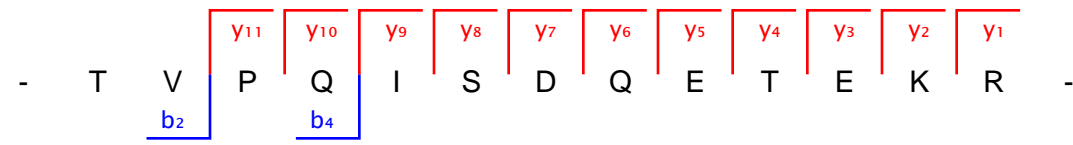

| Raw file                      | Scan | Method    | Score | m/z    | Gene names    |
|-------------------------------|------|-----------|-------|--------|---------------|
| 20140602_QEp4_FaHo_SA_SWD3_03 | 3212 | FTMS; HCD | 69.82 | 391.88 | RPL31A;RPL31B |

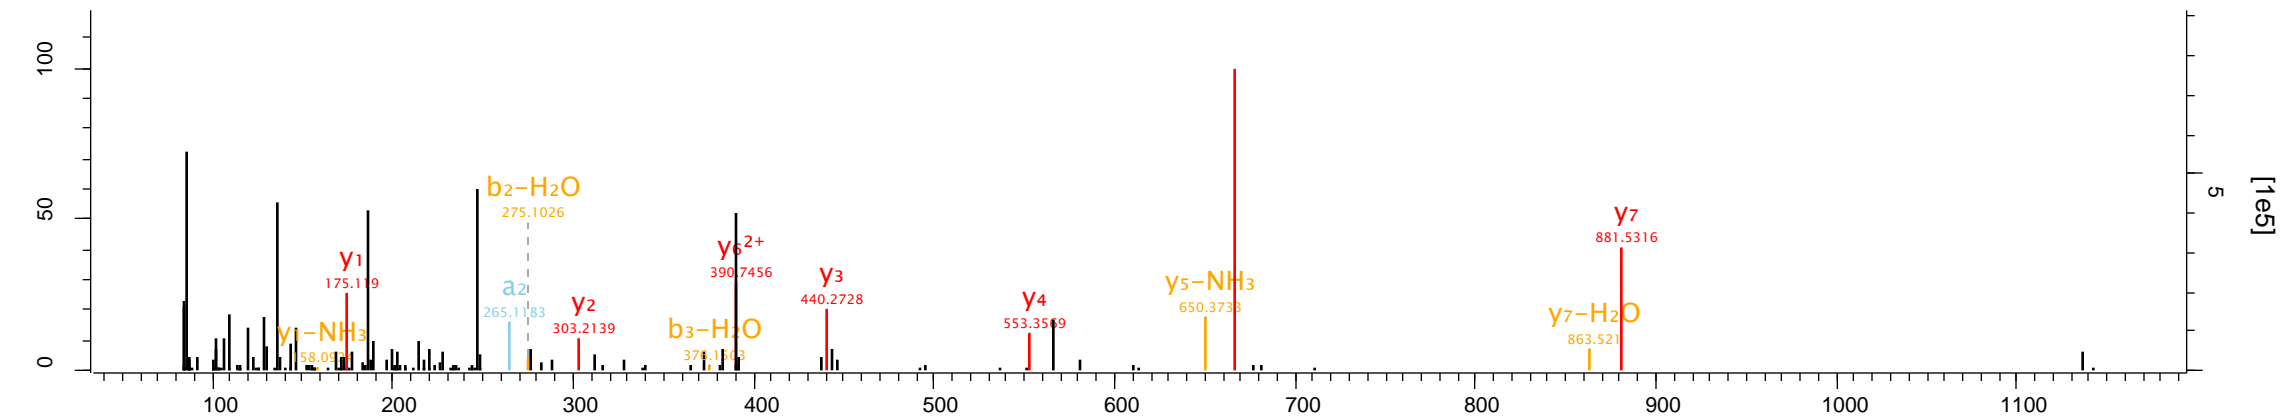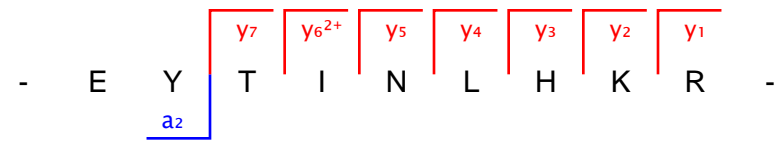

20140602\_QEp4\_FaHo\_SA\_SW3\_(3506 FTMS; HCC 225.26 701.83 TY1A-PR1;TY1A-A;TY1A-DR4;TY1B-PR1;TY1B-JR2;TY1A-PL;TY1A-LR2;TY1A-ER1;TY1A-DR6;TY1B-OL;TY1B-LR4;TY1B-ML2;TY1B-PR3;TY1B-PL;TY1B-L

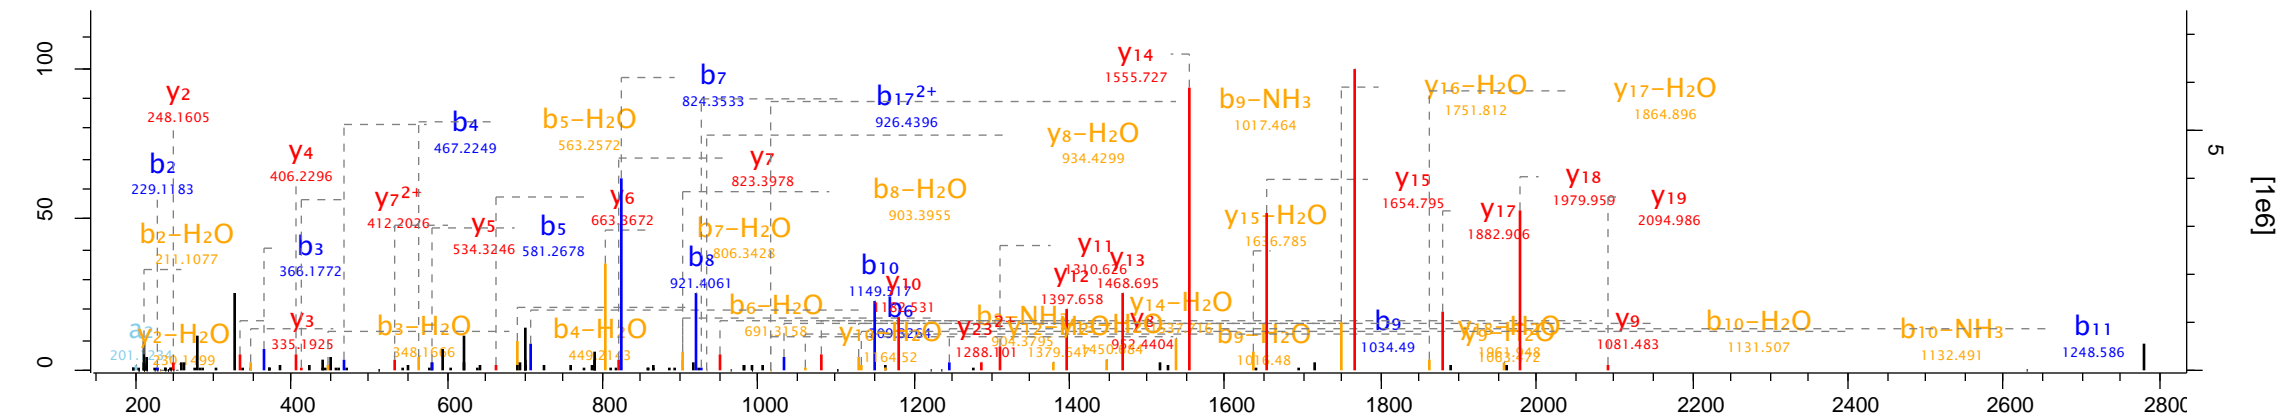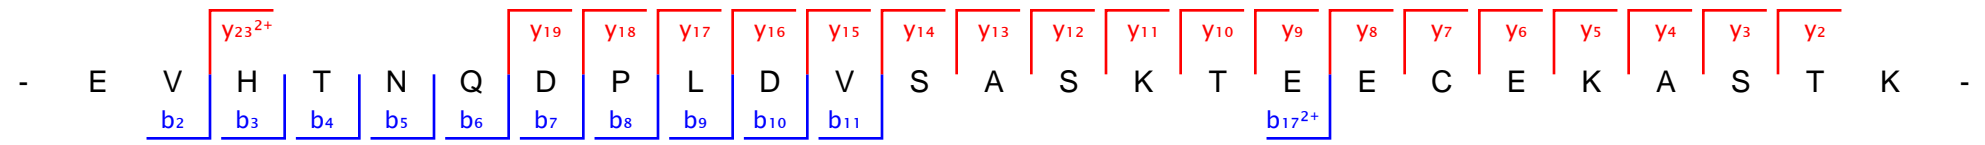

Raw file

Scar Method Score m/z Gene names

20140602\_QEp4\_FaHo\_SA\_389.D FTMS; 117.9 507.5 TY1B-ML1;TY1B-BR;TY1B-H;TY1B-MR2;TY1B-OR;TY1B-DR1;TY1B-NL2;TY1B-PR2;TY1B-DR5;TY1B-PR1;TY1B-JR2;TY1B-NL1;TY1B-OL;TY1B-LR4;TY1B-ML2;TY1B-DR3

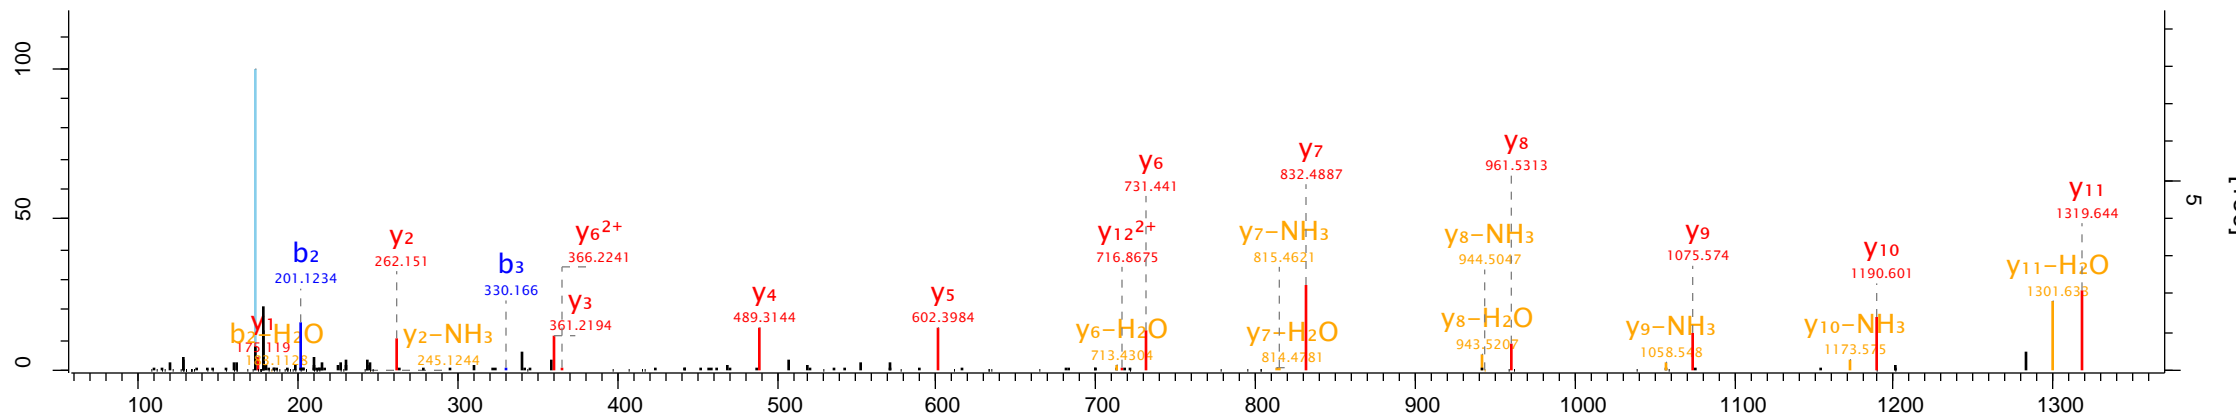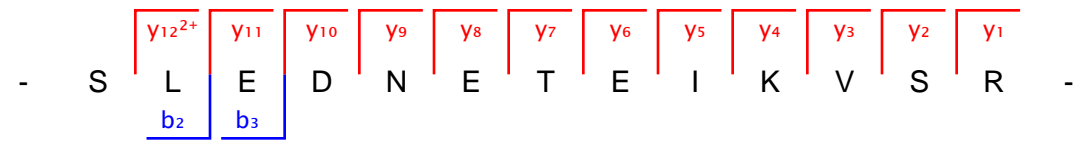

Raw file

Scan

Method

Score

m/z

Gene names

20140602\_QEp4\_FaHo\_SA\_SWD3\_03

6130

FTMS; HCD

94.27

754.87

TY1B-ML1;TY1B-BR;TY1B-H;TY1B-MR2;TY1B-OR;TY1B-NL2;TY1B-PR2;TY1B-DR5;TY1B-PR1;TY1B-JR2;TY1B-DR3

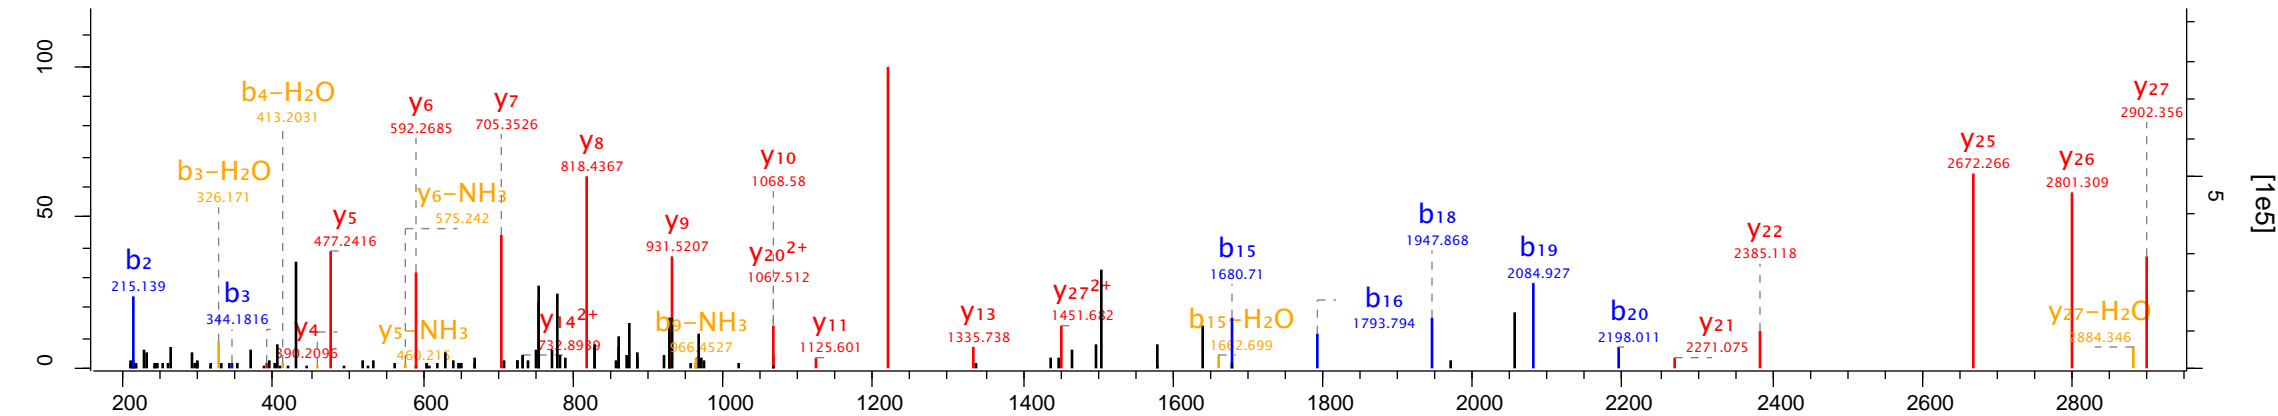

- L T E S T V N H T N H S D D E L P G H L L L D S G A S R

Fragmentation mapping (b and y ions) is shown below the sequence:

- Red boxes above the sequence indicate y-ion fragments: y<sub>27</sub> (L-T), y<sub>26</sub> (T-E), y<sub>25</sub> (E-S), y<sub>22</sub> (N-H), y<sub>21</sub> (H-T), y<sub>20</sub><sup>2+</sup> (T-N).
- Blue boxes below the sequence indicate b-ion fragments: b<sub>2</sub> (L-T), b<sub>3</sub> (T-E), b<sub>15</sub> (E-L), b<sub>16</sub> (L-P), b<sub>18</sub> (P-G), b<sub>19</sub> (G-H), b<sub>20</sub> (H-L).

20140602\_QEp4\_FaHc\_622\_FTM93\_123\_550.TY1B-ML1;TY1B-BR;TY1B-H;TY1B-MR2;TY1B-OR;TY1B-DR1;TY1B-NL2;TY1B-PR2;TY1B-DR5;TY1B-PR1;TY1B-JR2;TY1B-NL1;TY2B-C;TY1B-OL;TY1B-LR4;TY1B-ML2;TY1B-DR3;T

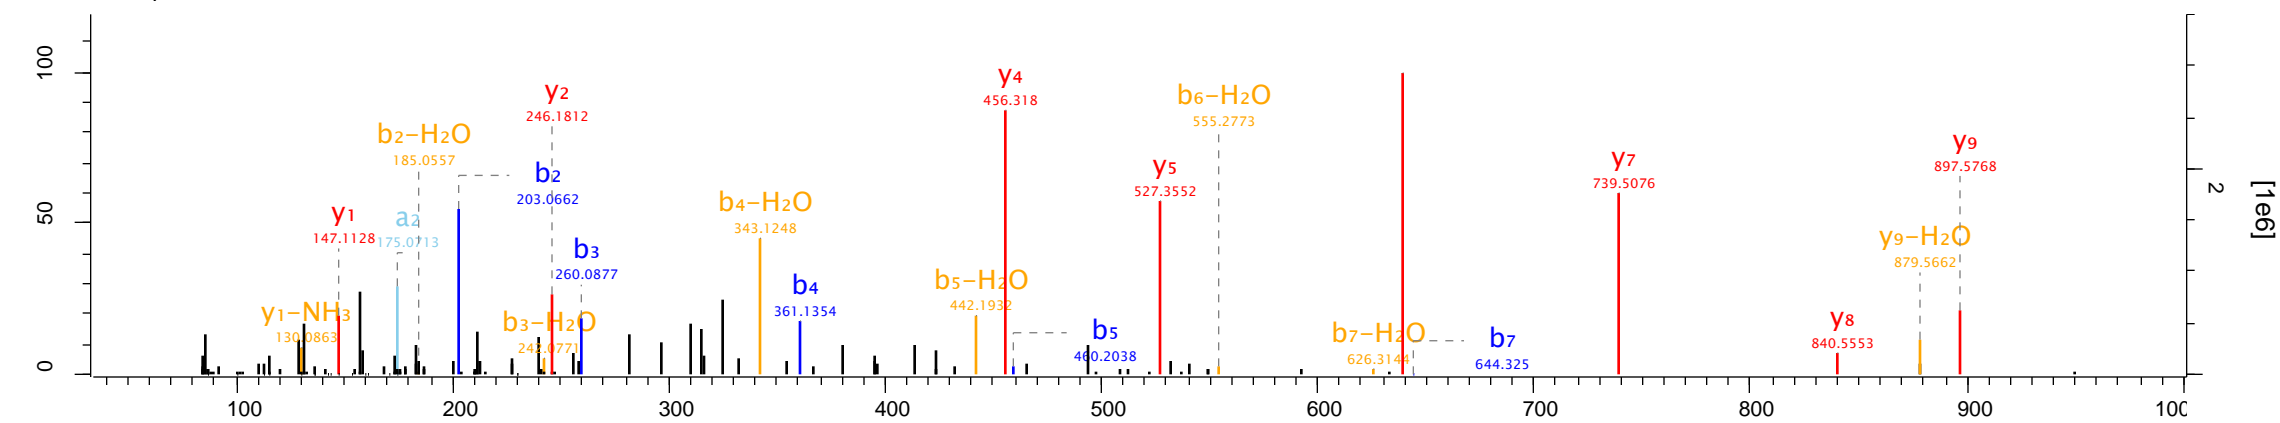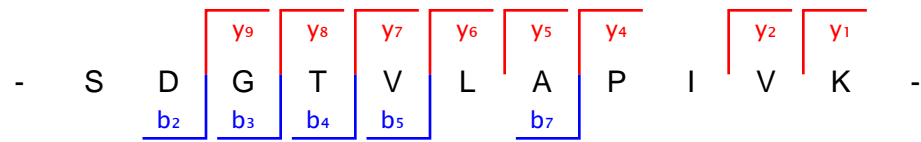

Raw file Scan Method Score m/z  
20140602\_QEp4\_FaHo\_SA\_SWI3\_01x 6161 FTMS; HCD 6.29 635.79

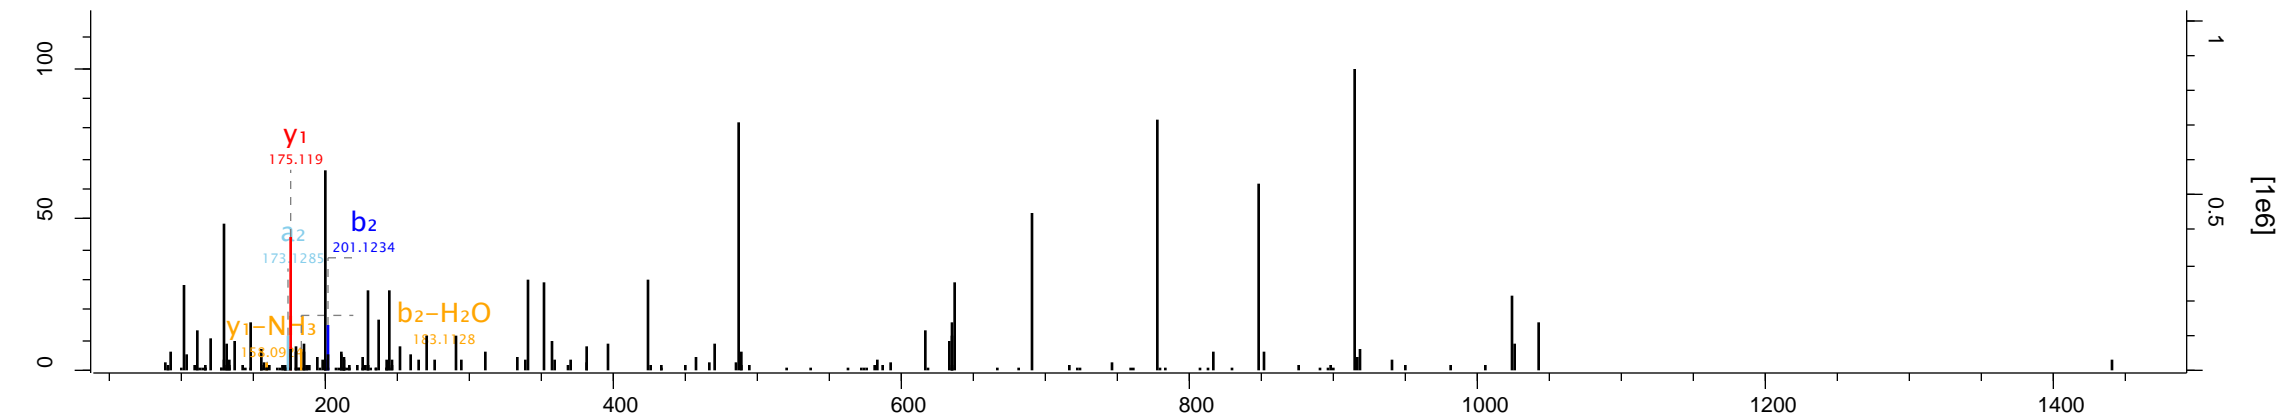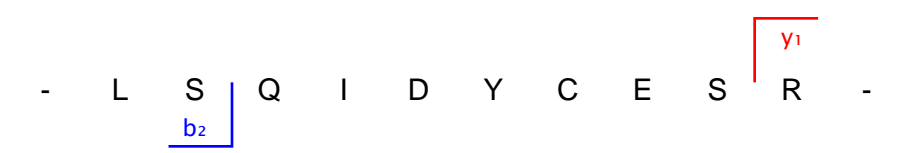



| Raw file                       | Scan | Method    | Score | m/z   | Gene names    |
|--------------------------------|------|-----------|-------|-------|---------------|
| 20140602_QEp4_FaHo_SA_SWI3_01x | 6612 | FTMS; HCD | 57.48 | 587.3 | RPL17A;RPL17B |

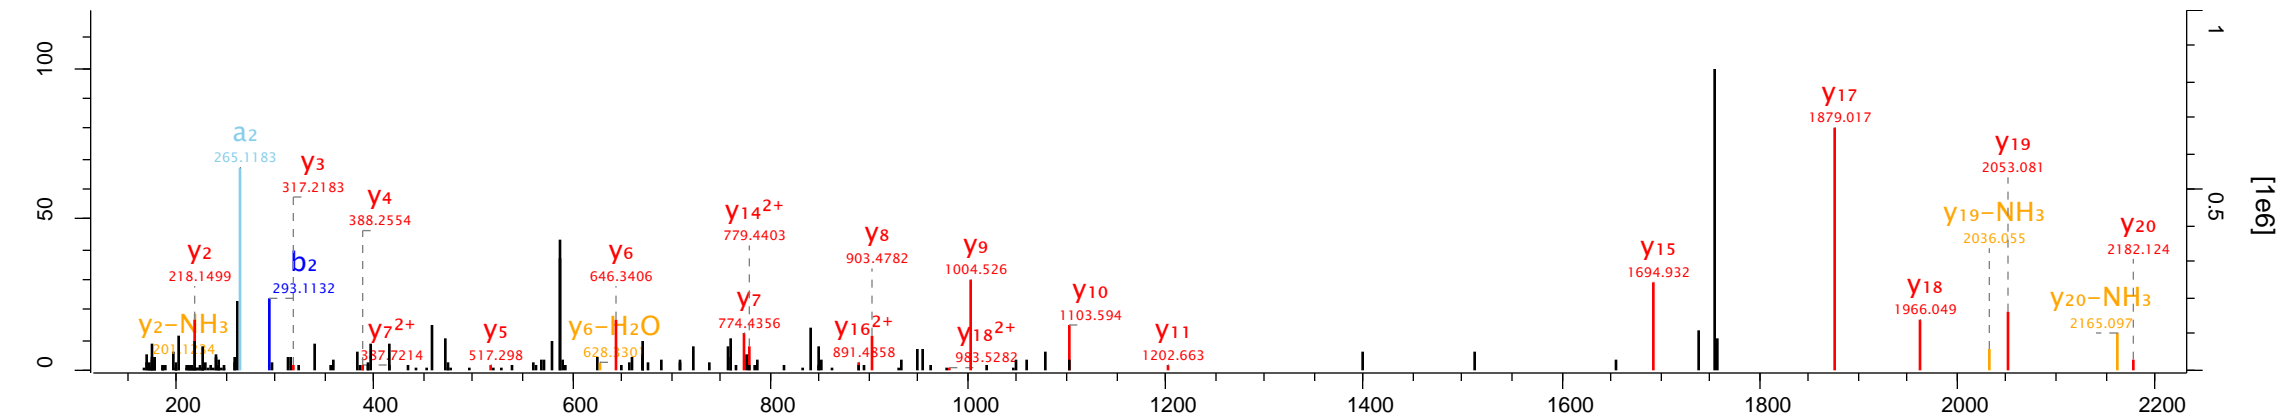

- Y E S S P S H I E L V V T E K E E A V A K -

Fragmentation labels above the sequence:
   
y20 y19 y18 y17 y16<sup>2+</sup> y15 y14<sup>2+</sup>
  
y11 y10 y9 y8 y7 y6 y5 y4 y3 y2
  
b2

Raw file 20140602\_QEp4\_FaHo\_SA\_SWI3\_01x Scan 8553 Method FTMS; HCD Score 202.35 m/z 726.72 Gene names RPL9A;RPL9B

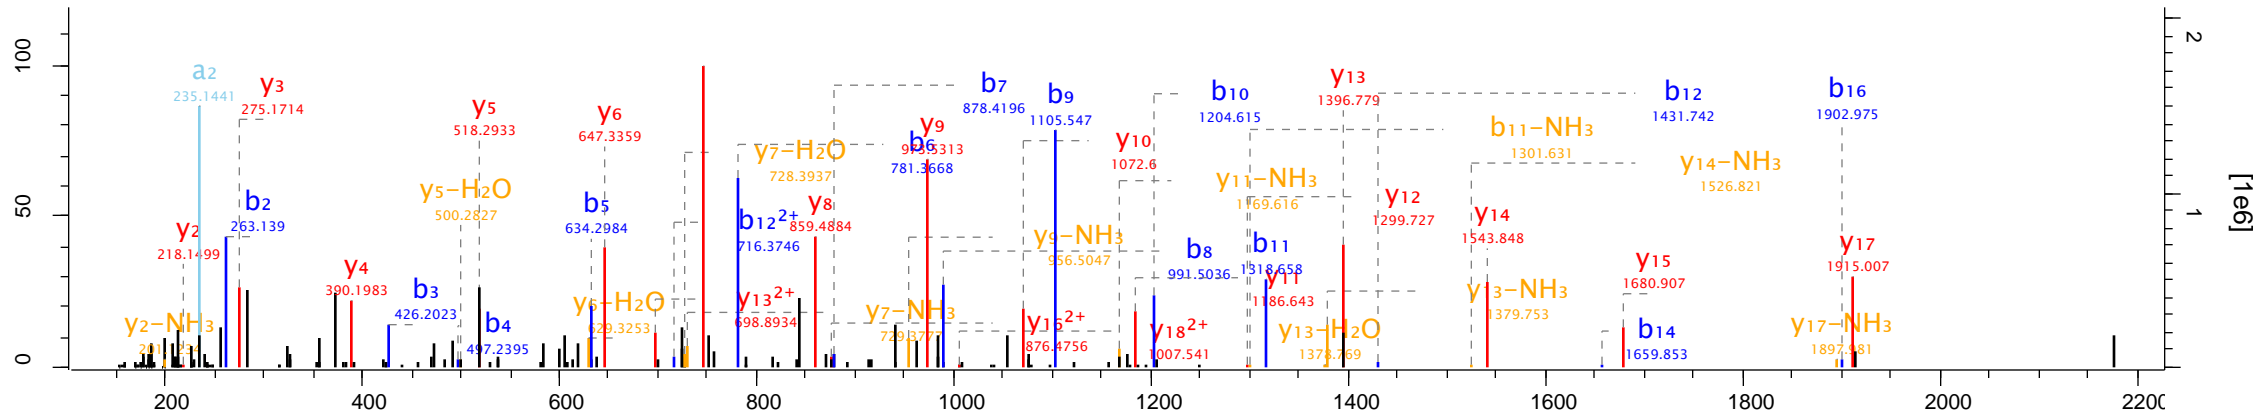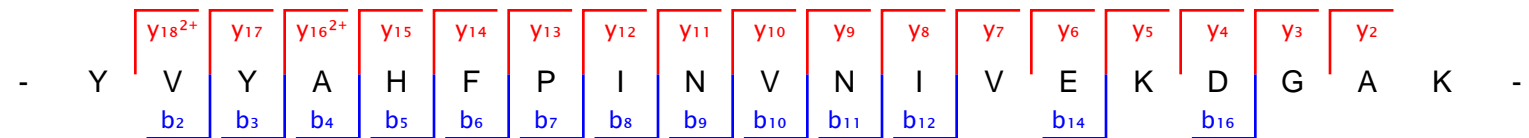

Raw file Scan Method Score m/z  
 20140602\_QEp4\_FaHo\_SA\_SWI3\_01 x 8848 FTMS; HCD 62.03 703.34

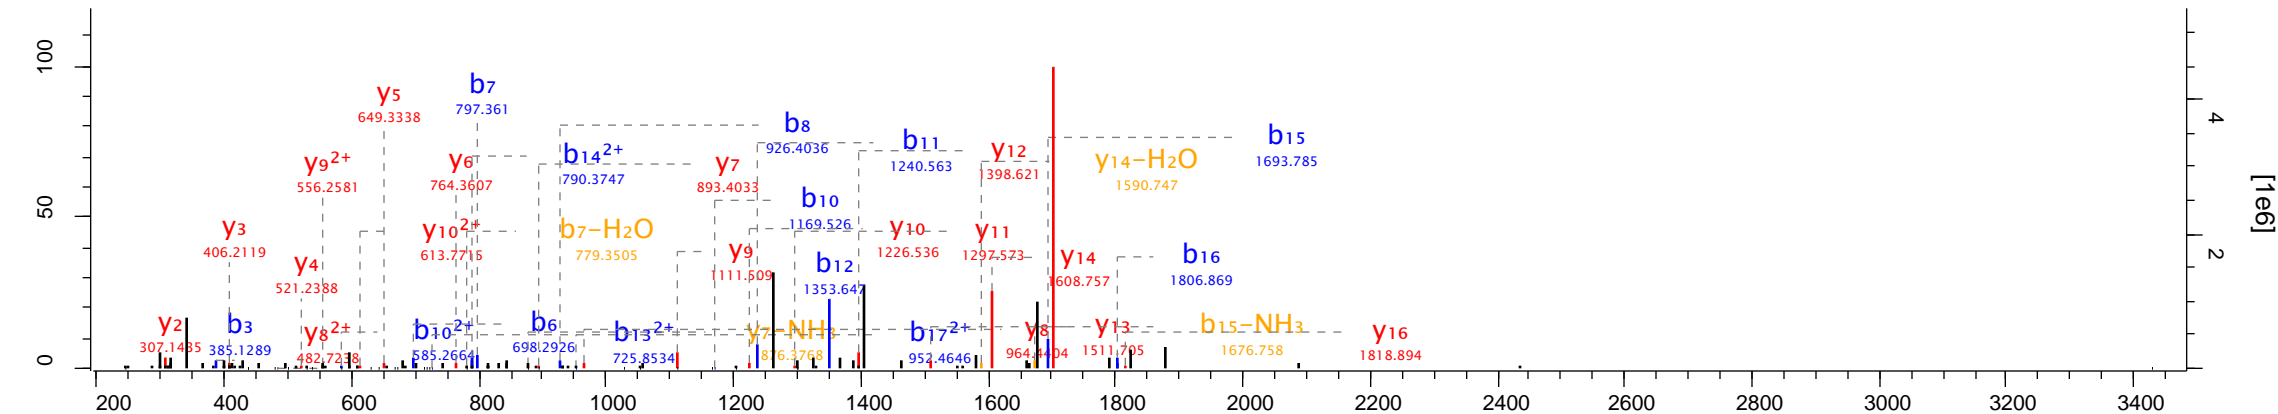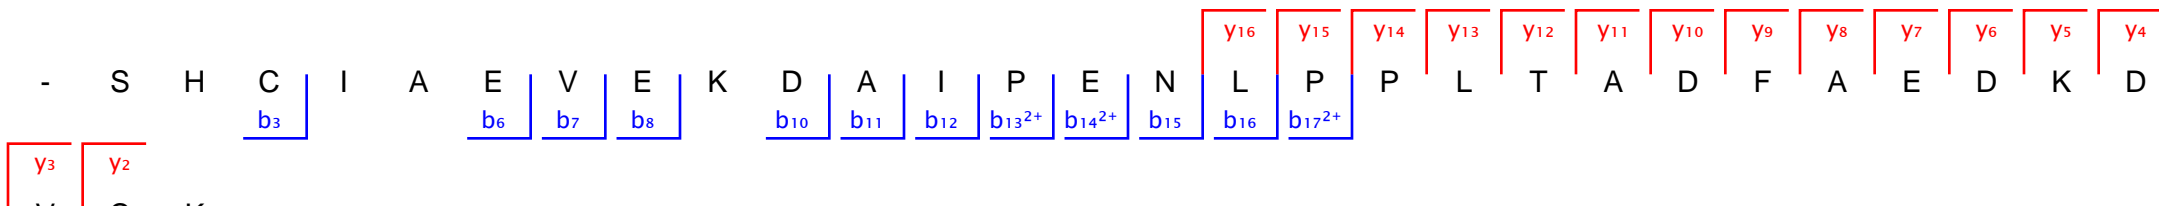

Raw file Scan Method Score m/z Gene names

20140602\_QEp4\_FaHo\_SA\_SWI3\_01x

9215 FTMS; HCD 68.66 881.1 TIM23

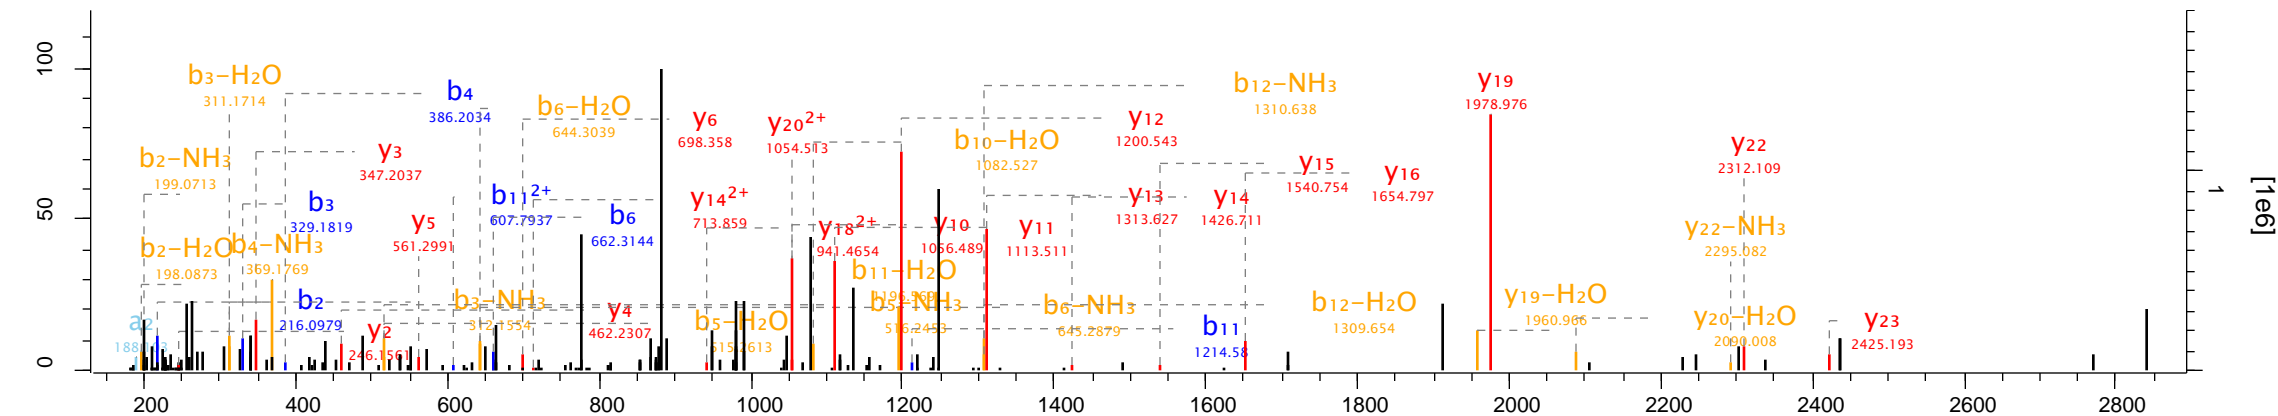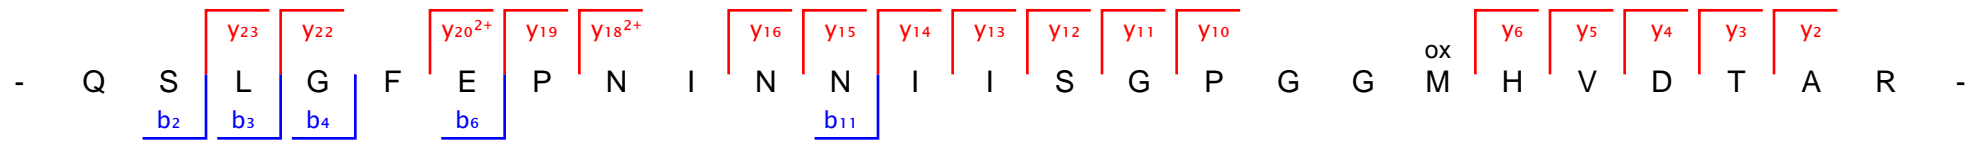

| Raw file                      | Scan | Method    | Score | m/z    | Gene names    |
|-------------------------------|------|-----------|-------|--------|---------------|
| 20140602_QEp4_FaHo_SA_SWI3_02 | 3257 | FTMS; HCD | 152.7 | 597.28 | RPL13B;RPL13A |

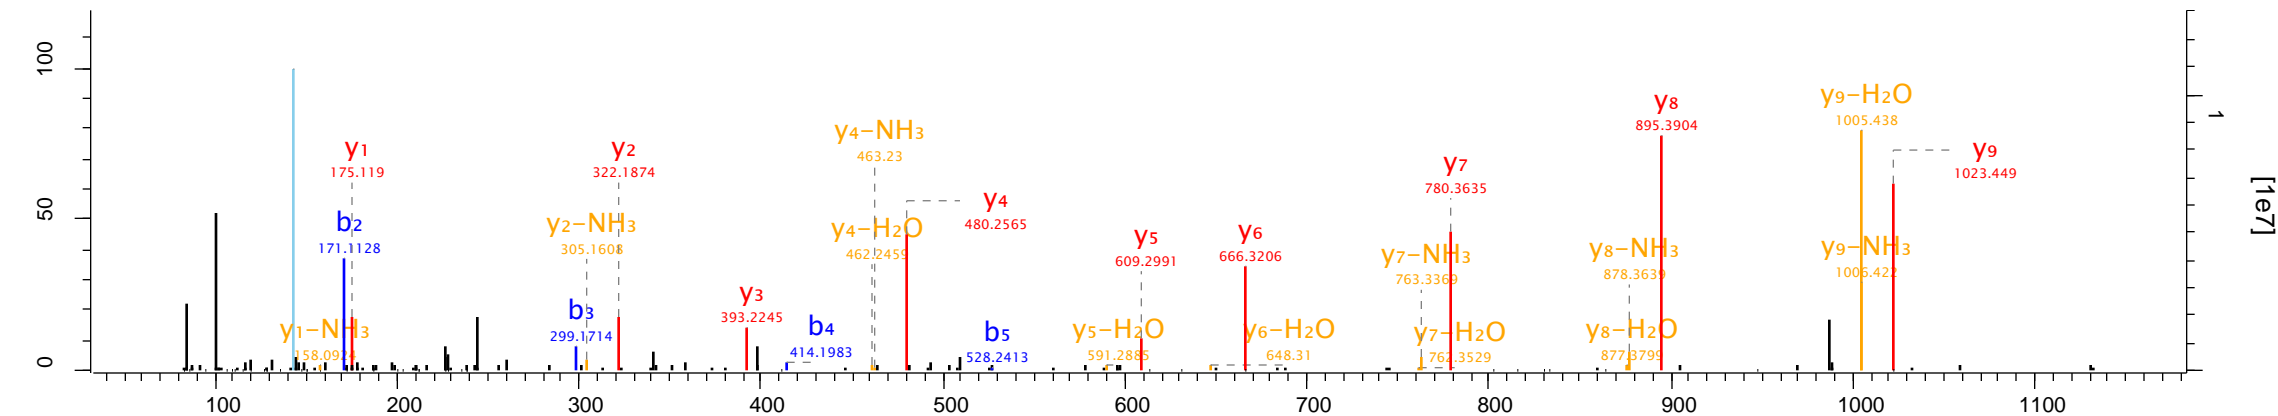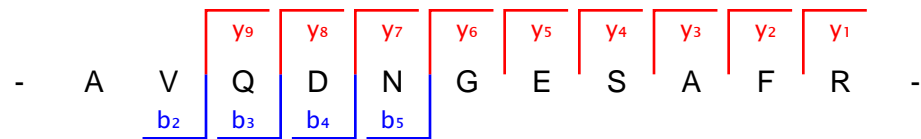

| Raw file                      | Scan | Method    | Score  | m/z    | Gene names |
|-------------------------------|------|-----------|--------|--------|------------|
| 20140602_QEp4_FaHo_SA_SWI3_02 | 5345 | FTMS; HCD | 140.49 | 567.79 | VPH1       |

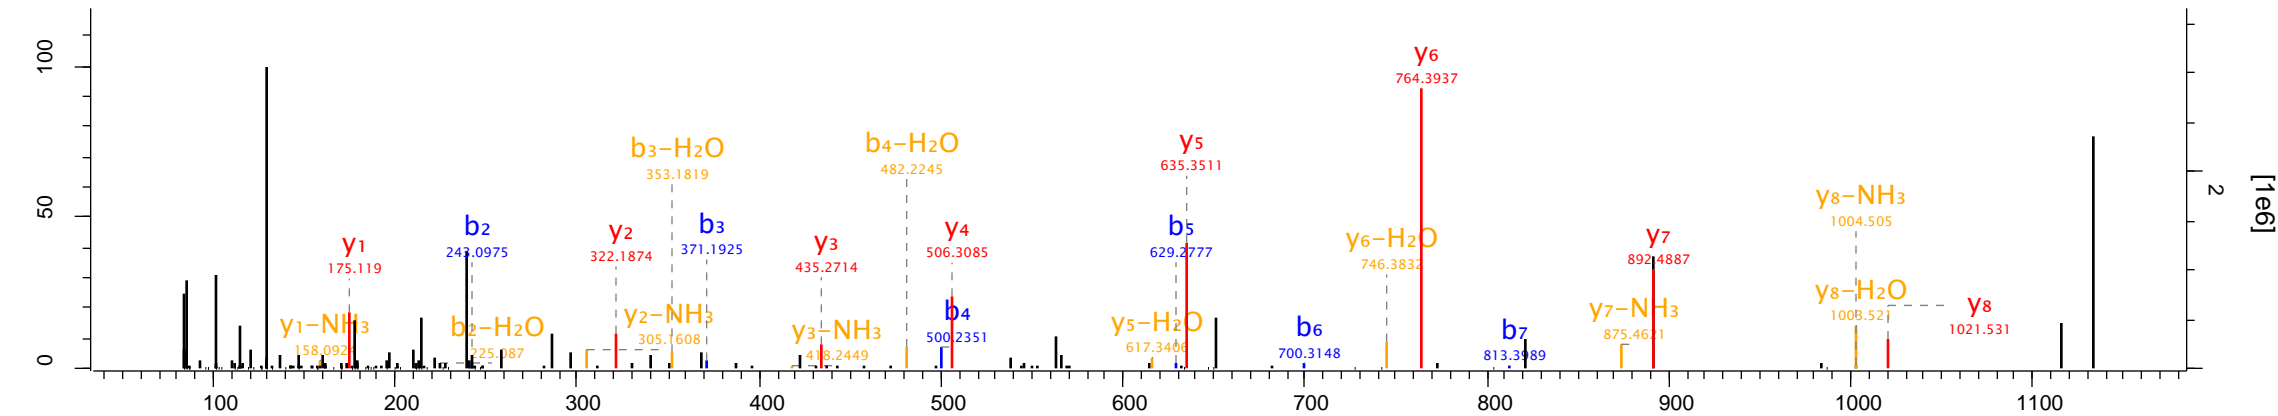

ac - A E K E E A I F R -

Fragmentation scheme diagram showing the sequence E K E E A I F R. The sequence is divided into segments by red and blue brackets. Red brackets (y-series) are above the sequence, and blue brackets (b-series) are below. The red brackets are labeled y8, y7, y6, y5, y4, y3, y2, and y1 from left to right. The blue brackets are labeled b2, b3, b4, b5, b6, and b7 from left to right. The sequence starts with 'A' and ends with a hyphen.

| Raw file                      | Scan | Method    | Score | m/z    | Gene names |
|-------------------------------|------|-----------|-------|--------|------------|
| 20140602_QEp4_FaHo_SA_SWI3_02 | 7474 | FTMS; HCD | 89.3  | 608.83 | SUI2       |

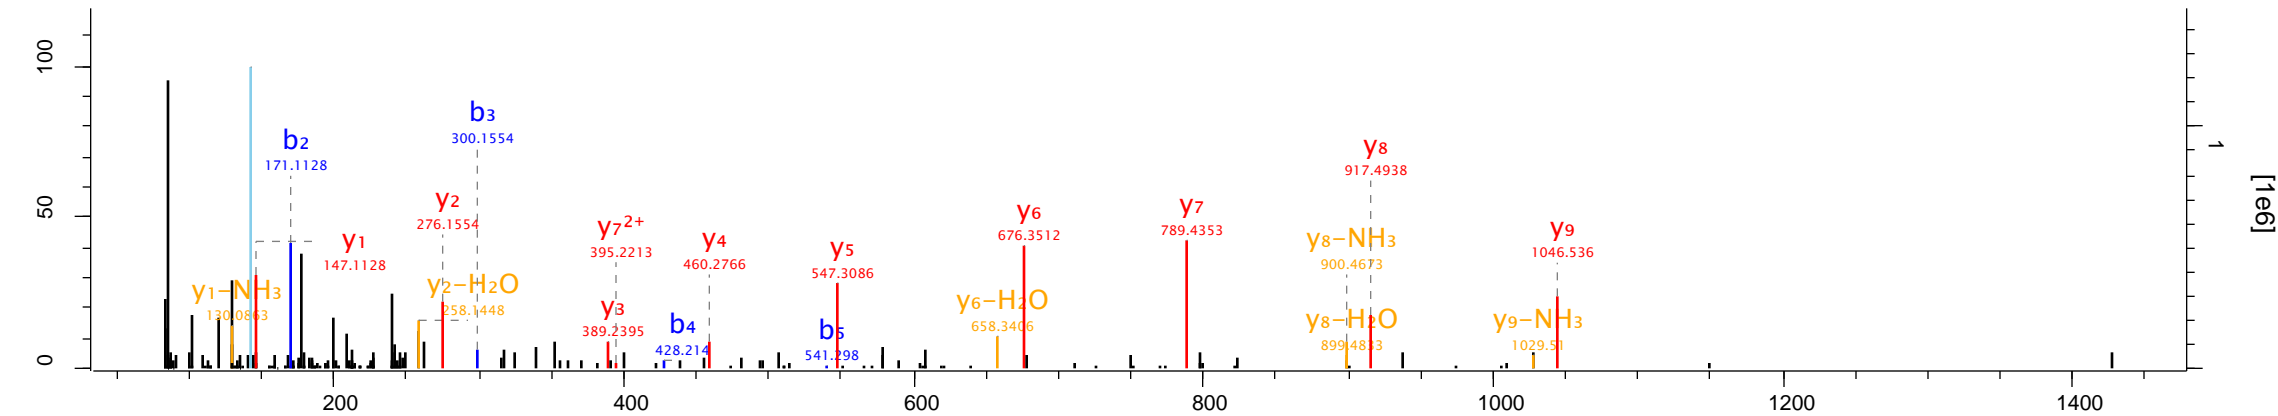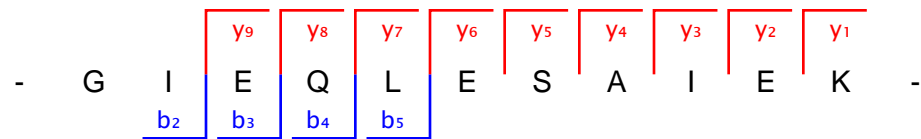

Raw file Scan Method Score m/z Gene names

20140602\_QEp4\_FaHo\_SA\_SWI3\_02 9857 FTMS; HCD 114.55 687.69 HNT1

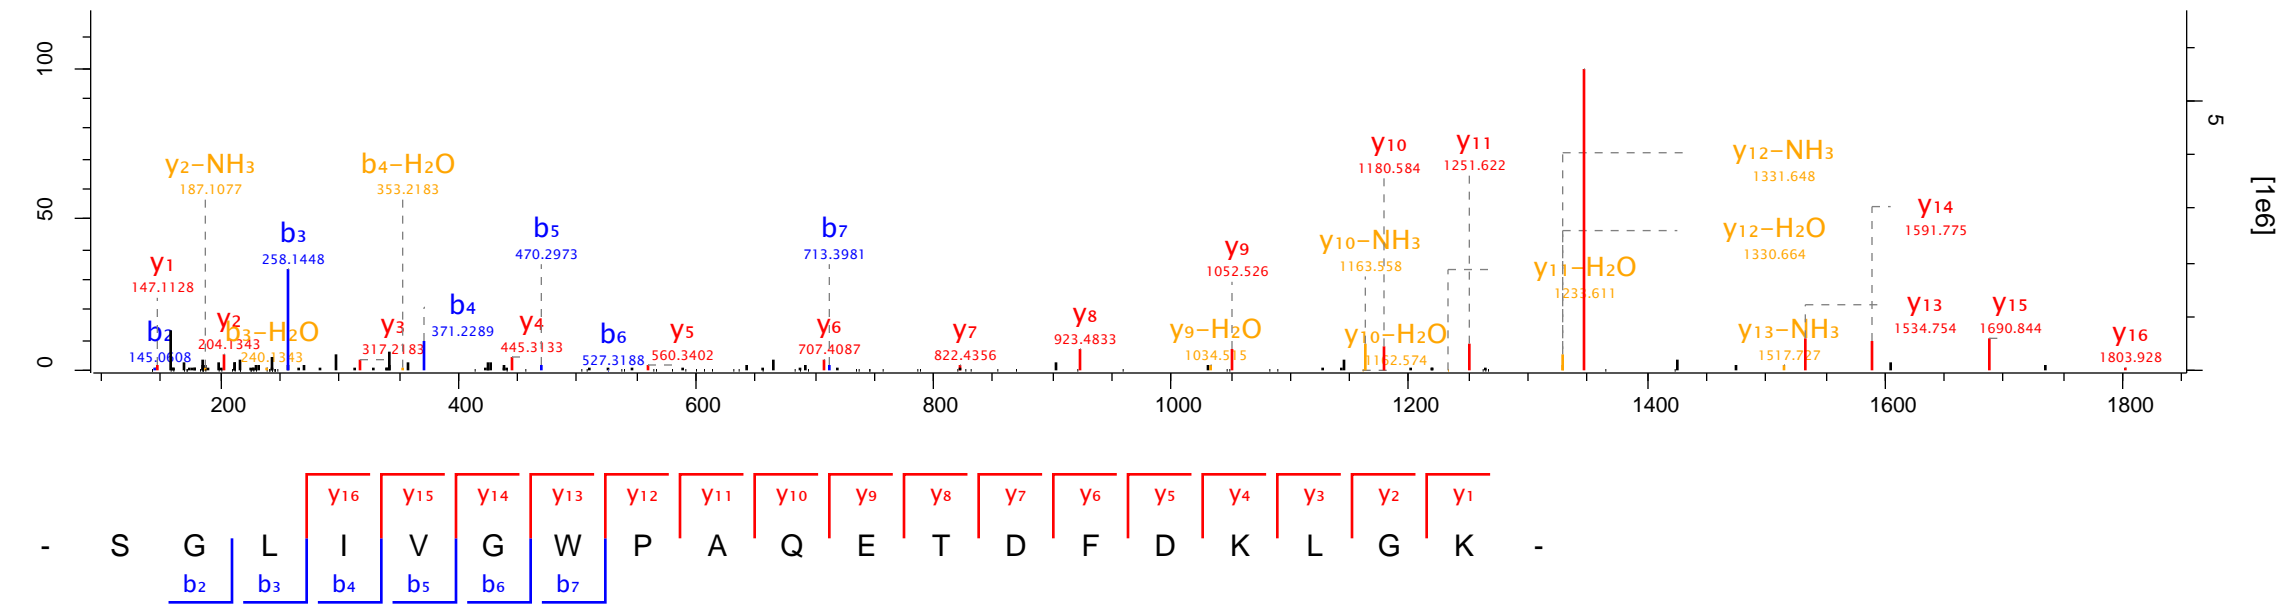



| Raw file                      | Scan | Method    | Score | m/z    | Gene names    |
|-------------------------------|------|-----------|-------|--------|---------------|
| 20140602_QEp4_FaHo_SA_SWI3_03 | 69   | FTMS; HCD | 62.46 | 367.72 | RPL14B;RPL14A |

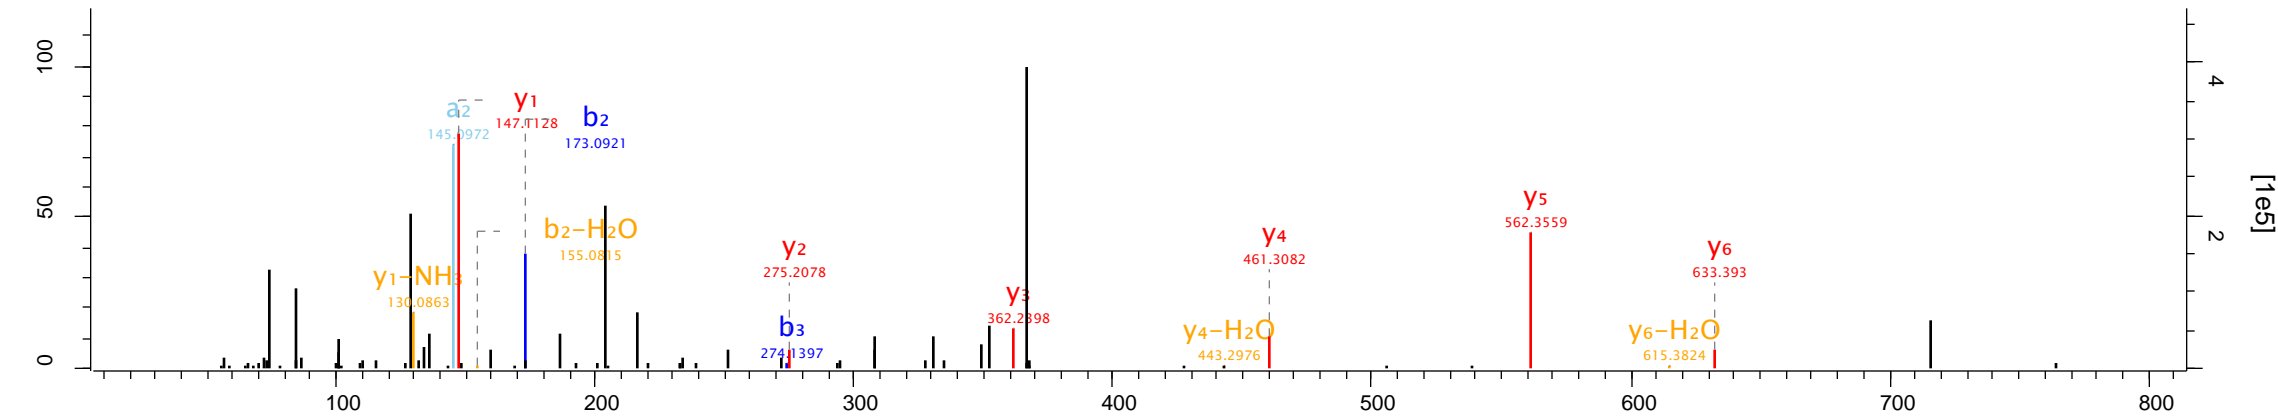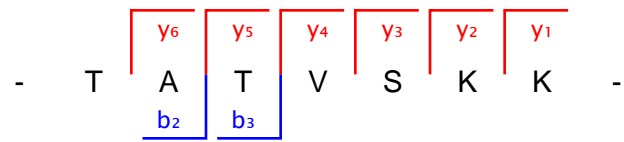

| Raw file                      | Scan | Method    | Score | m/z    | Gene names    |
|-------------------------------|------|-----------|-------|--------|---------------|
| 20140602_QEp4_FaHo_SA_SWI3_03 | 4232 | FTMS; HCD | 54.16 | 339.85 | RPL31A;RPL31B |

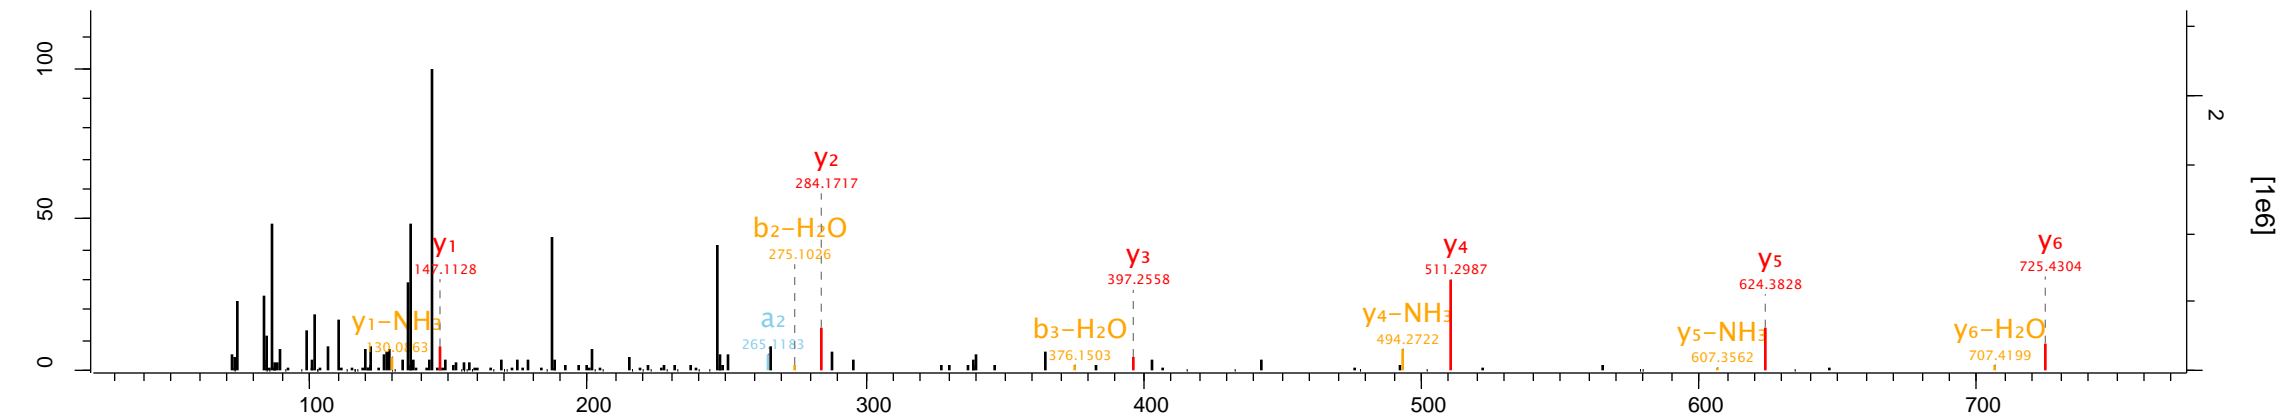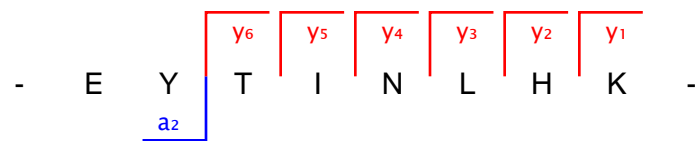

Raw file Scan Method Score m/z Gene names  
 20140602\_QEp4\_FaHo\_SA\_SWI3\_03 4697 FTMS; HCD 237.53 748.92 RPL17A;RPL17B

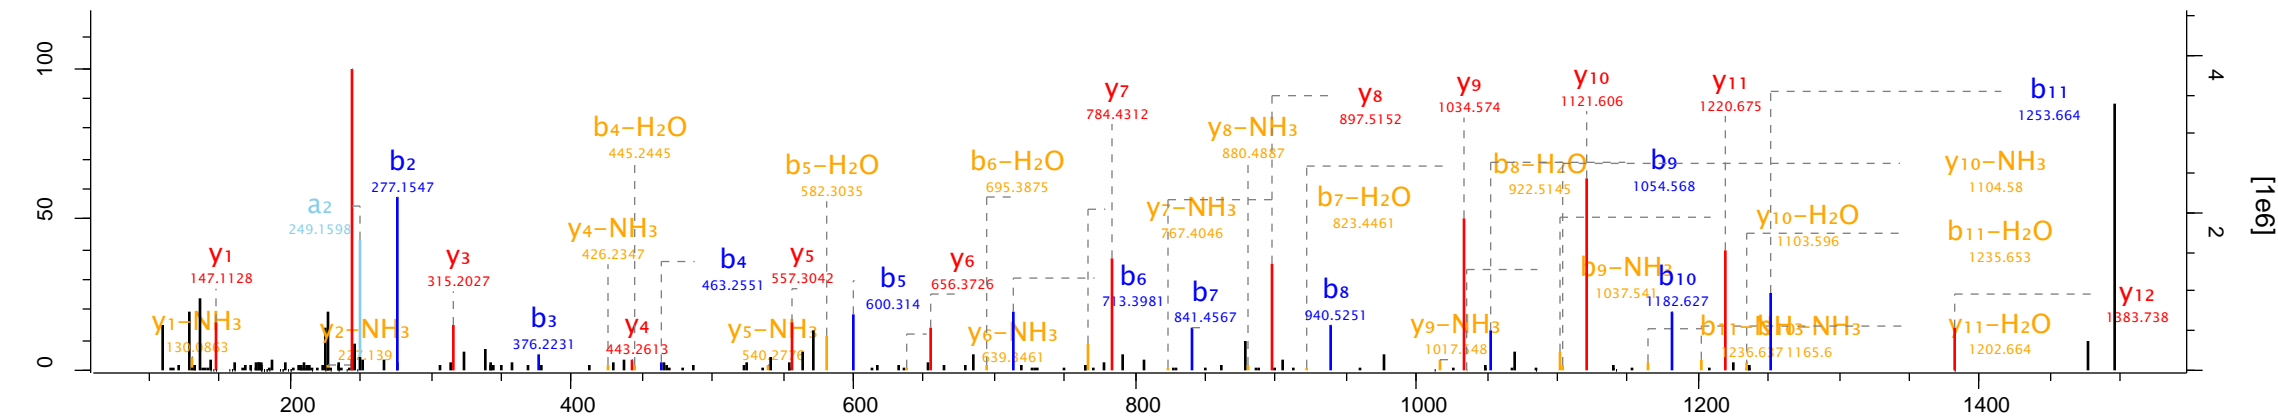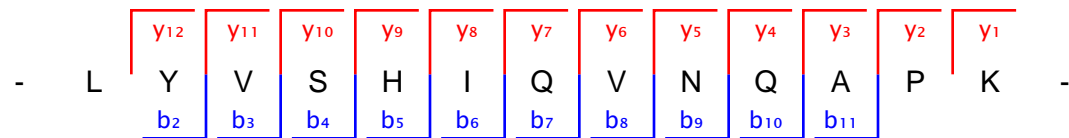

Raw file 20140608\_QEp4\_FaHo\_QC\_NTO1\_01 Scan 2025 Method FTMS; HCD Score 170.89 m/z 591.8 Gene names TY1B-ML1;TY1B-BR;TY1B-H;TY1B-MR2;TY1B-OR;TY1B-DR1;TY1B-NL2;TY1B-PR2;TY1B-DR5;TY1B-NL1;TY1B-DR3

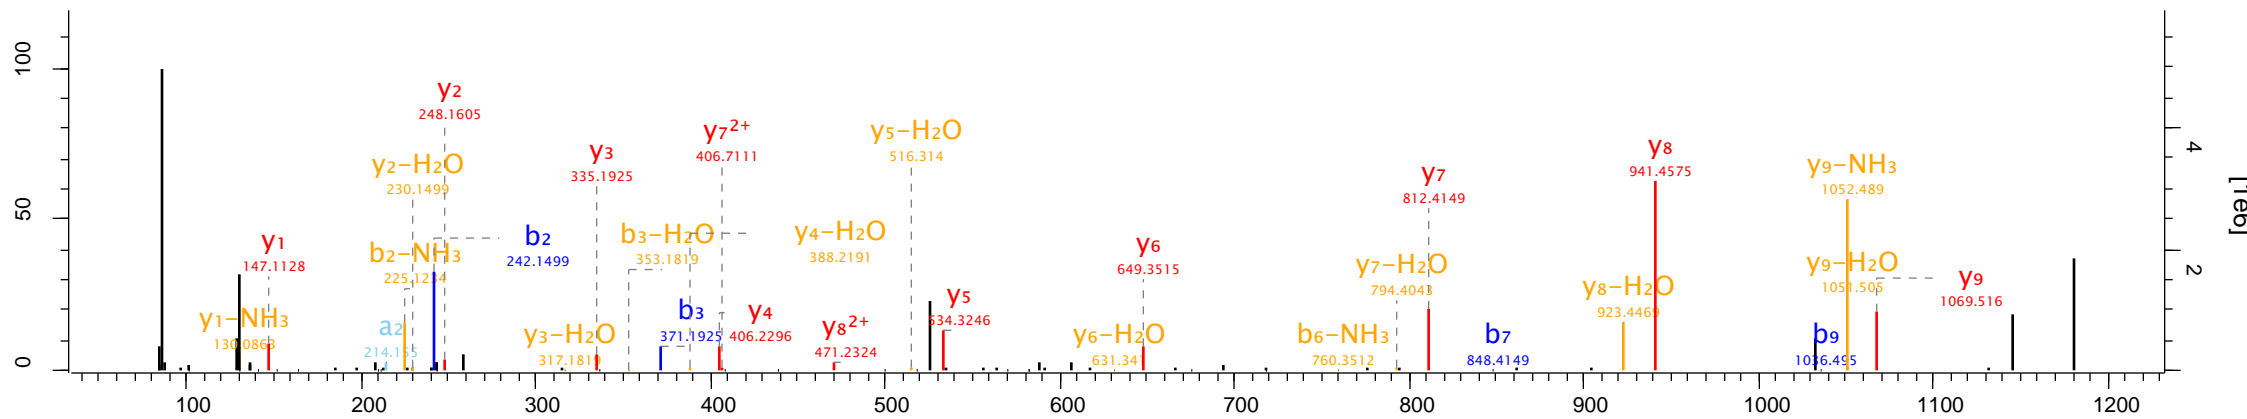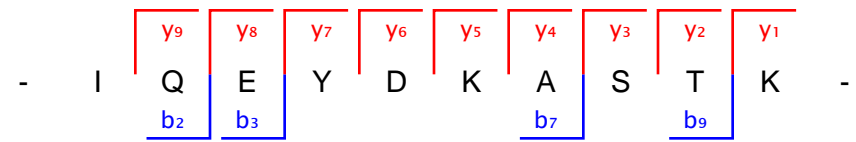

20140608\_QEp4\_FaHo\_QC\_360@FTMS; 82.6 446.7 TY1B-ML1;TY1B-BR;TY1B-H;TY1B-MR2;TY1B-OR;TY1B-DR1;TY1B-NL2;TY1B-PR2;TY1B-DR5;TY1B-PR1;TY1B-JR2;TY1B-NL1;TY1B-OL;TY1B-LR4;TY1B-ML2;TY1B-DR3

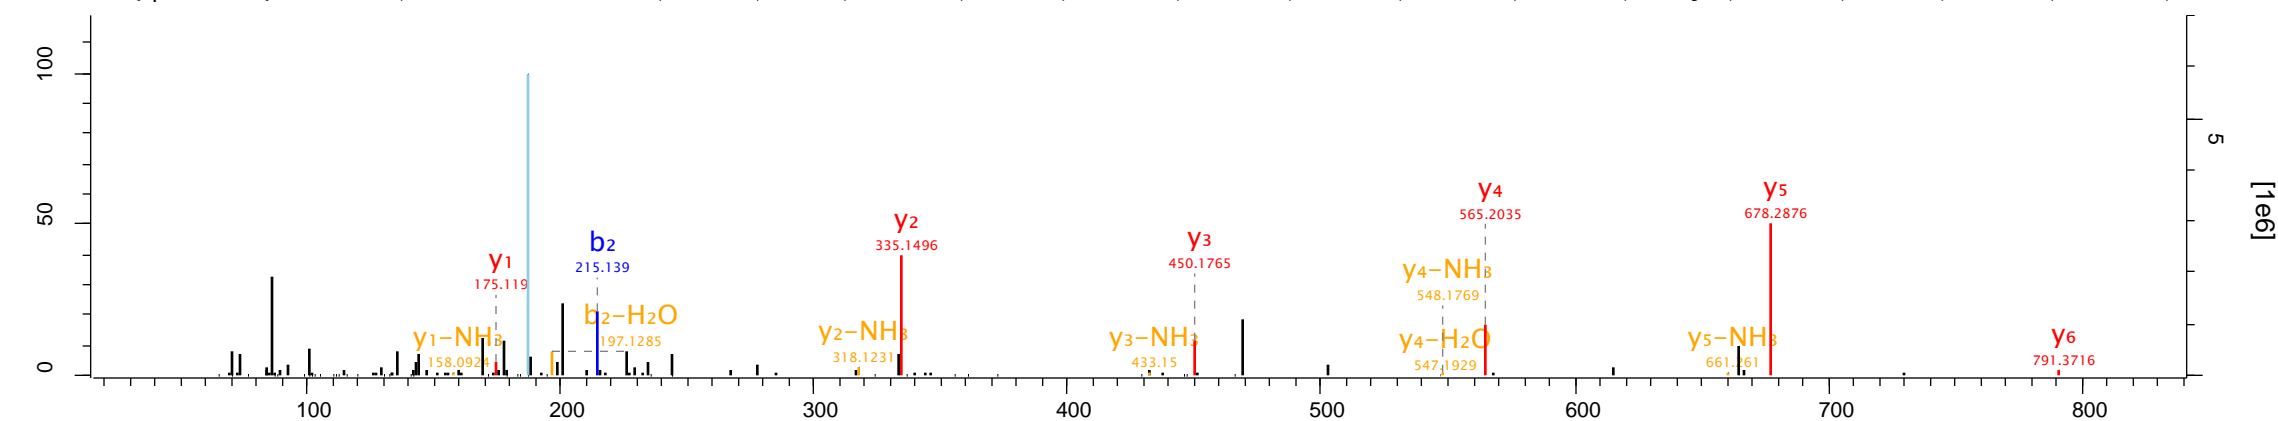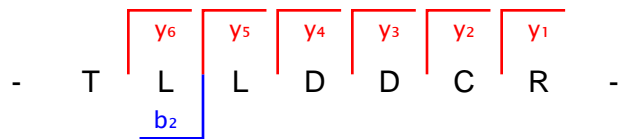

Raw file Scan Method Score m/z Gene names

20140608\_QEp4\_FaHo\_QC\_NTO1\_01 3707 FTMS; HCD 57.53 503.25 RPL14A

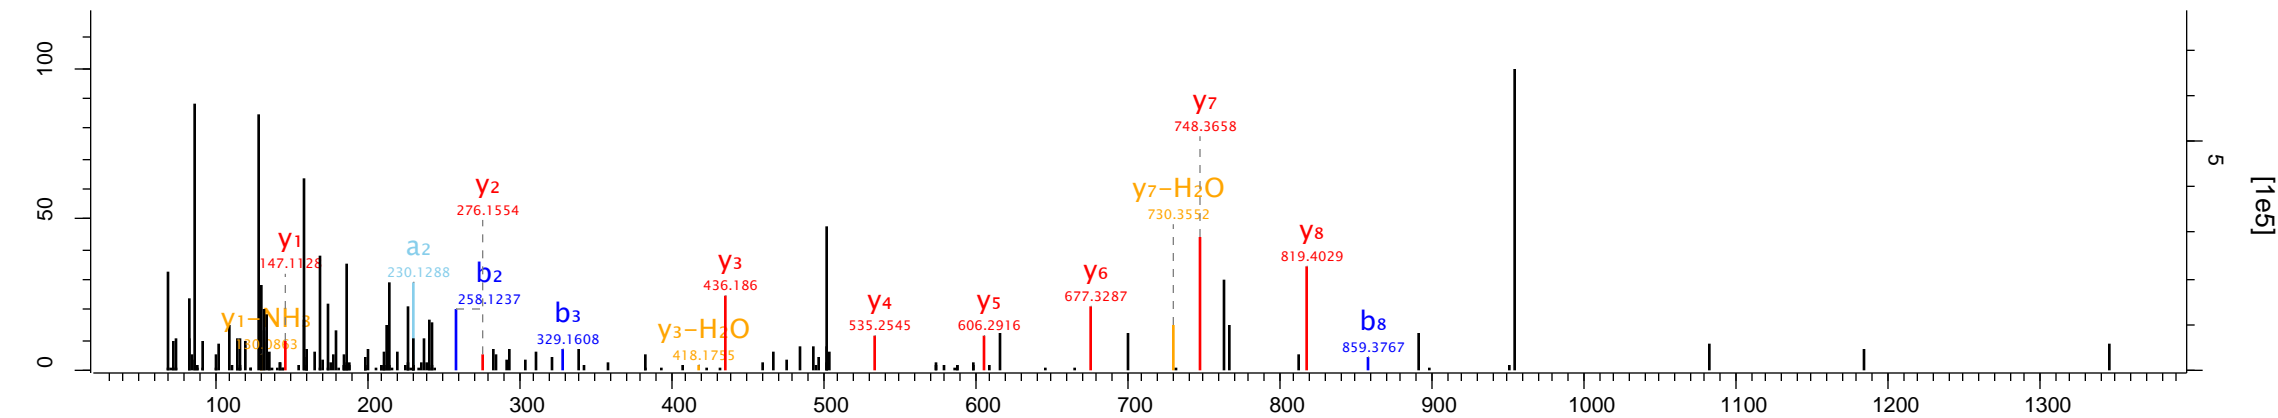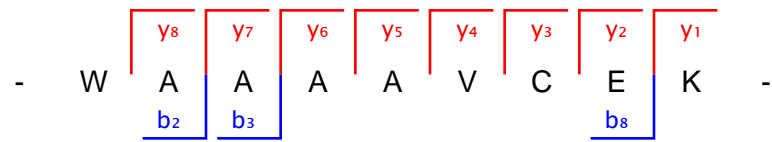

Raw file: 20140608\_QEp4\_FaHo\_QC\_NTO1\_01  
 Scan: 7796 Method: FTMS; HCD Score: 63.21 m/z: 582.32

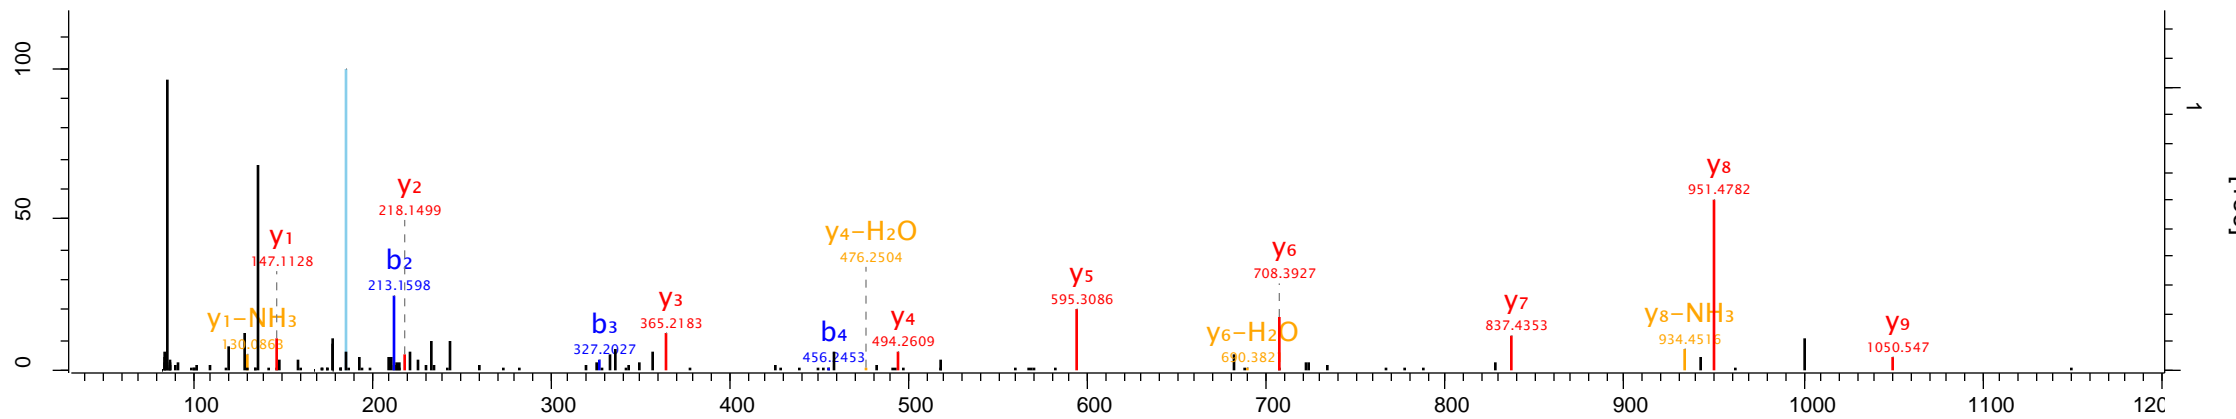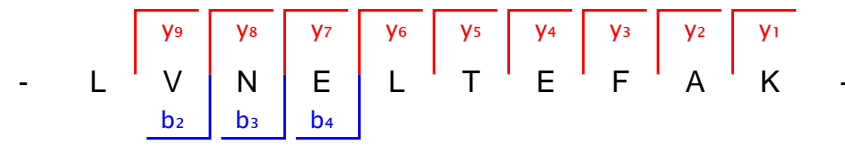

Raw file Scan Method Score m/z Gene names

20140608\_QEp4\_FaHo\_QC\_SHG1\_01 2315 FTMS; HCD 103.74 379.71 RPS26A

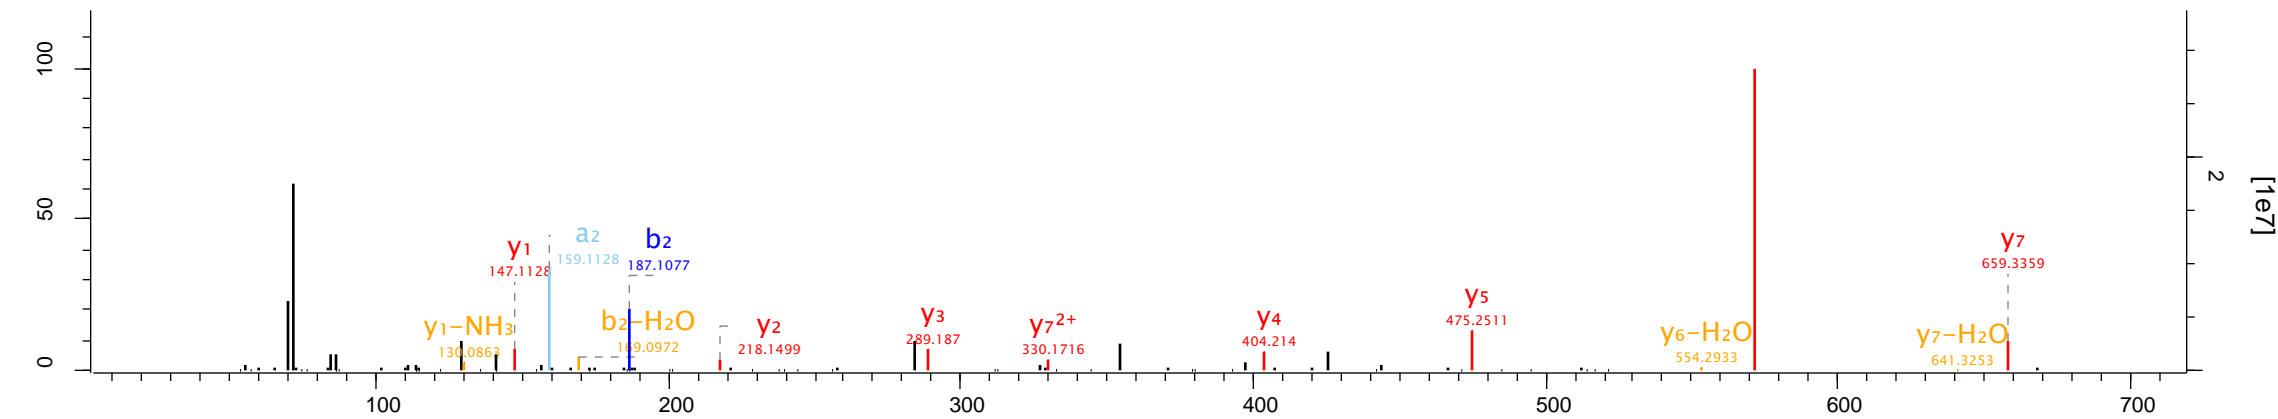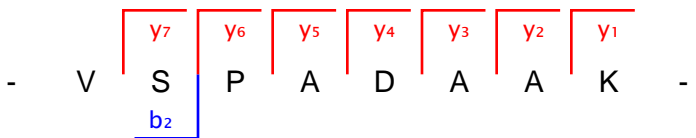



Raw file

Scan Method Score m/z Gene names

20140608\_QEp4\_FaHo\_QC\_SHG1\_01

2990 FTMS; HCD 111.01 429.74 RPP1A

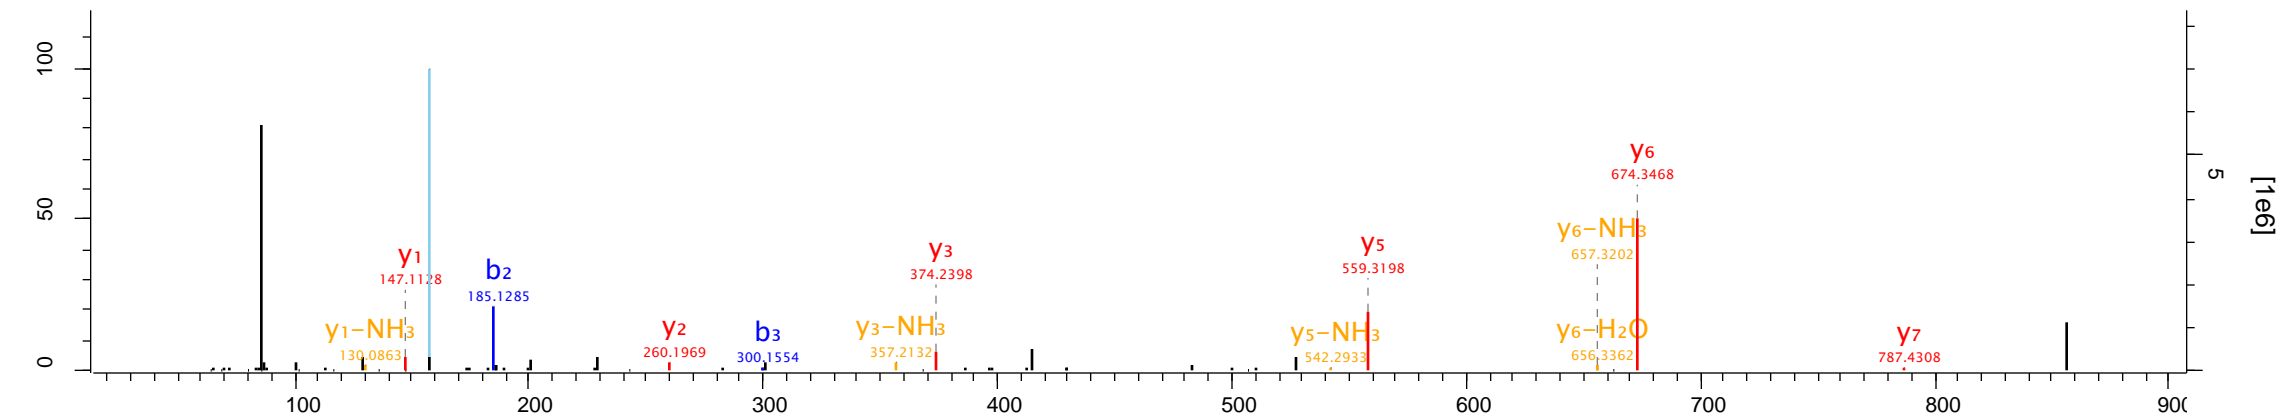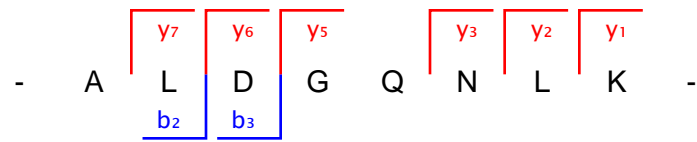

Raw file

Scan

Method

Score

m/z

Gene names

20140608\_QEp4\_FaHo\_QC\_SHG1\_01

4504

FTMS; HCD

94.31

537.3

TY1B-NL1;TY1A-DR2;TY1B-BL;TY1B-MR1;TY1A-MR1

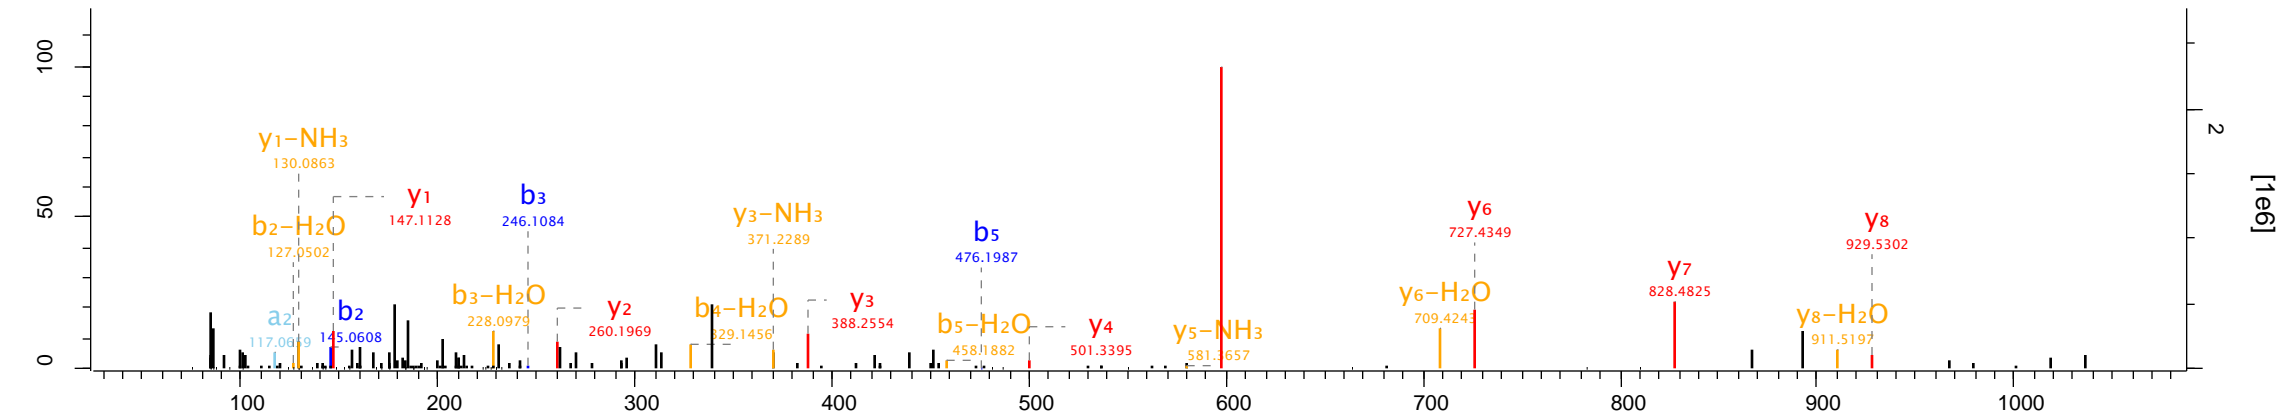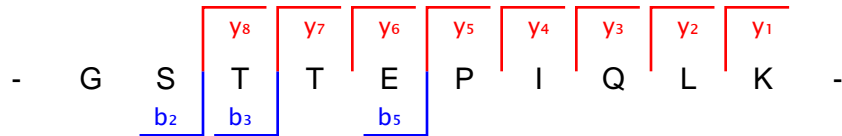

Raw file Scan Method Score m/z Gene names

20140608\_QEp4\_FaHo\_QC\_SHG1\_01 6585 FTMS; HCD 101.53 500.56 FRA1

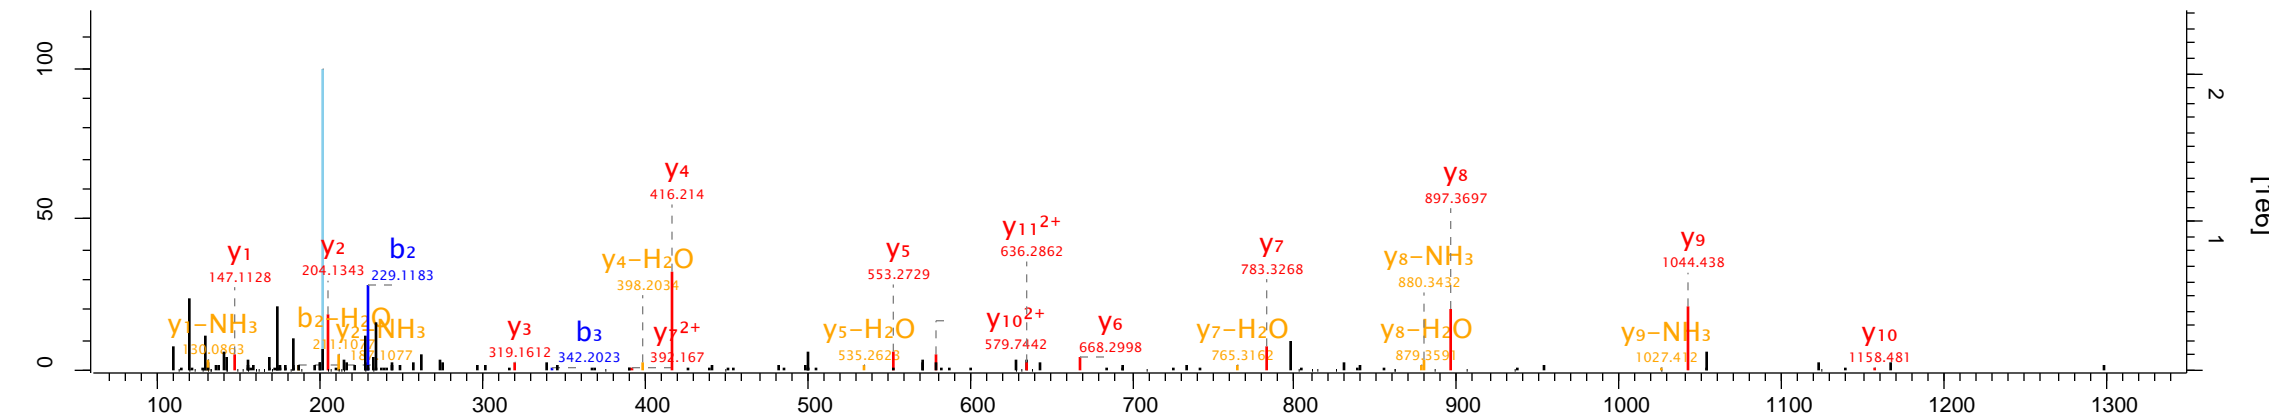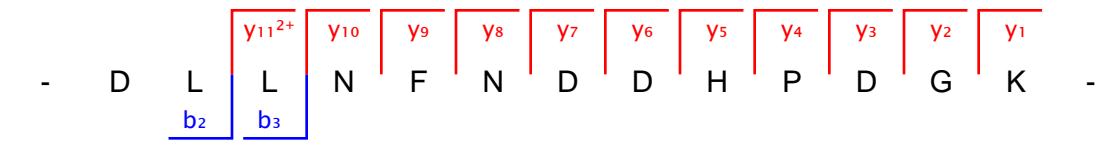

| Raw file                      | Scan | Method    | Score  | m/z    | Gene names  |
|-------------------------------|------|-----------|--------|--------|-------------|
| 20140608_QEp4_FaHo_QC_SHG1_01 | 8553 | FTMS; HCD | 126.83 | 639.34 | RPL9A;RPL9B |

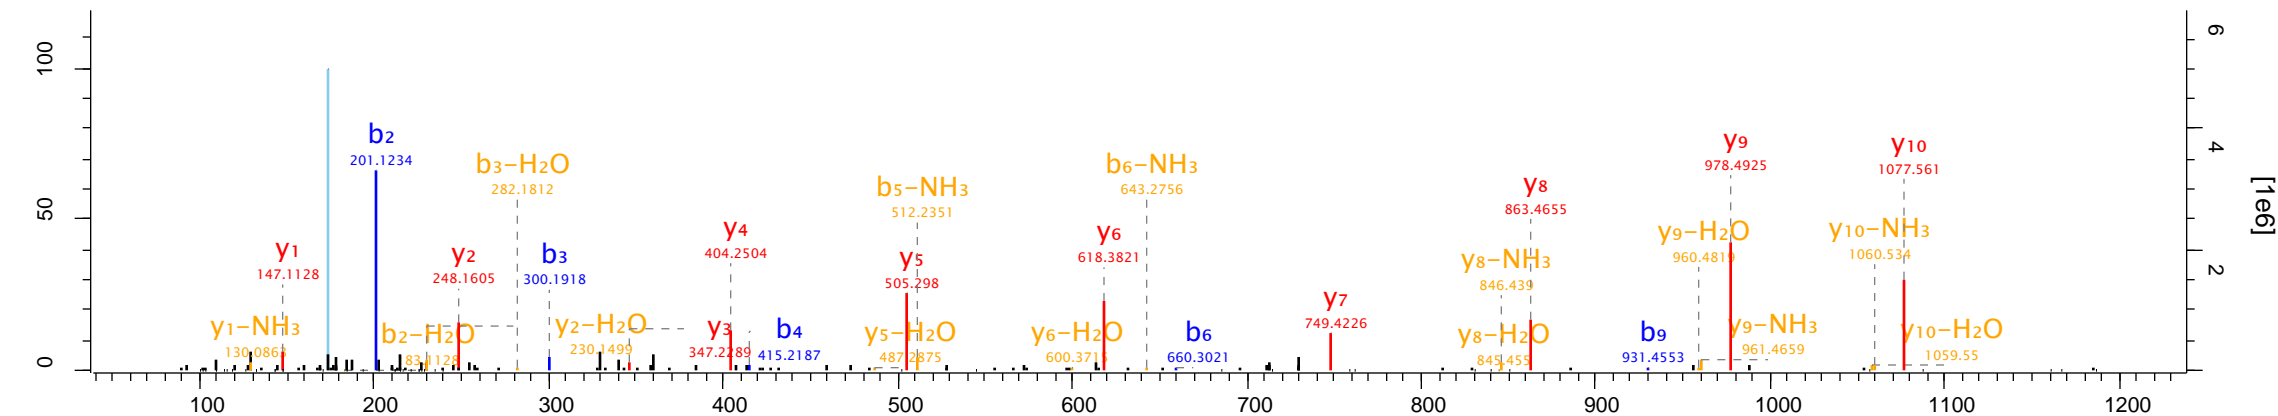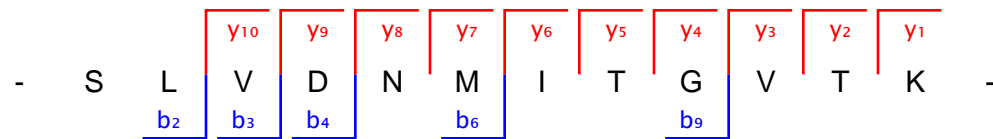

Raw file Scan Method Score m/z Gene names

20140608\_QEp4\_FaHo\_QC\_YNG1\_01 7151 FTMS; HCD 89.91 727.41 GRX5

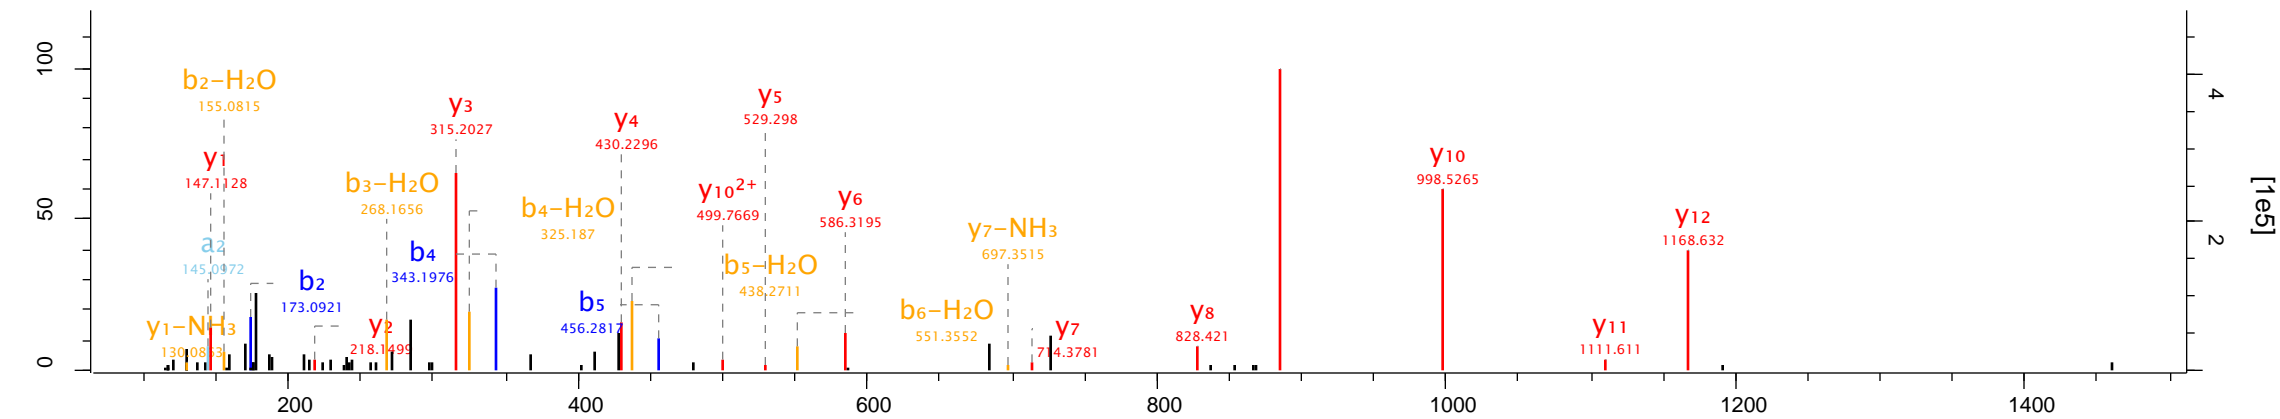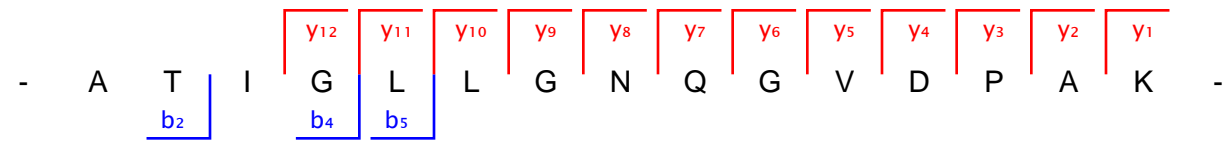

Raw file 20140608\_QEp4\_FaHo\_QC\_YNG1\_02 Scan 2434 Method FTMS; HCD Score 187.5 m/z 487.75 Gene names RPL7A

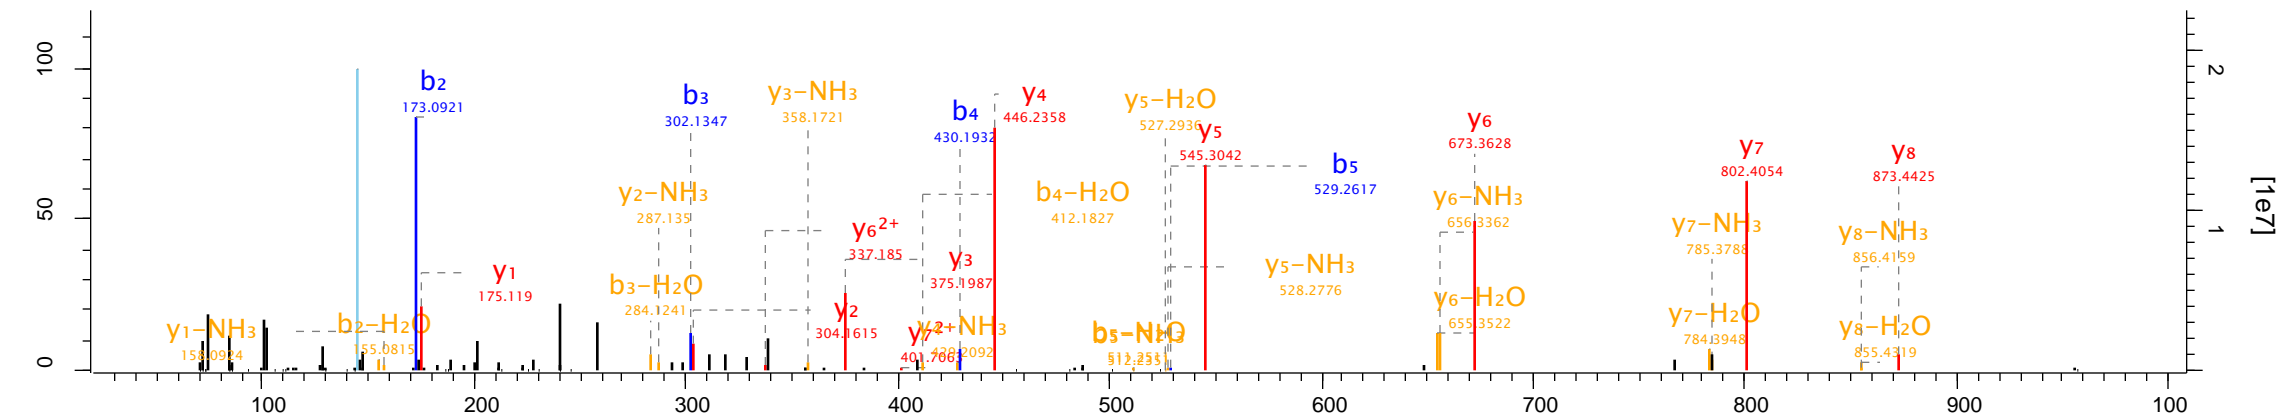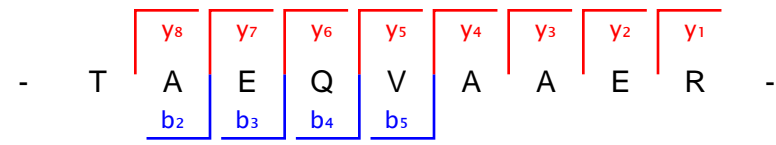

| Raw file                      | Scan | Method    | Score | m/z    | Gene names    |
|-------------------------------|------|-----------|-------|--------|---------------|
| 20140608_QEp4_FaHo_QC_YNG1_02 | 9078 | FTMS; HCD | 81.64 | 919.44 | RPS14B;RPS14A |

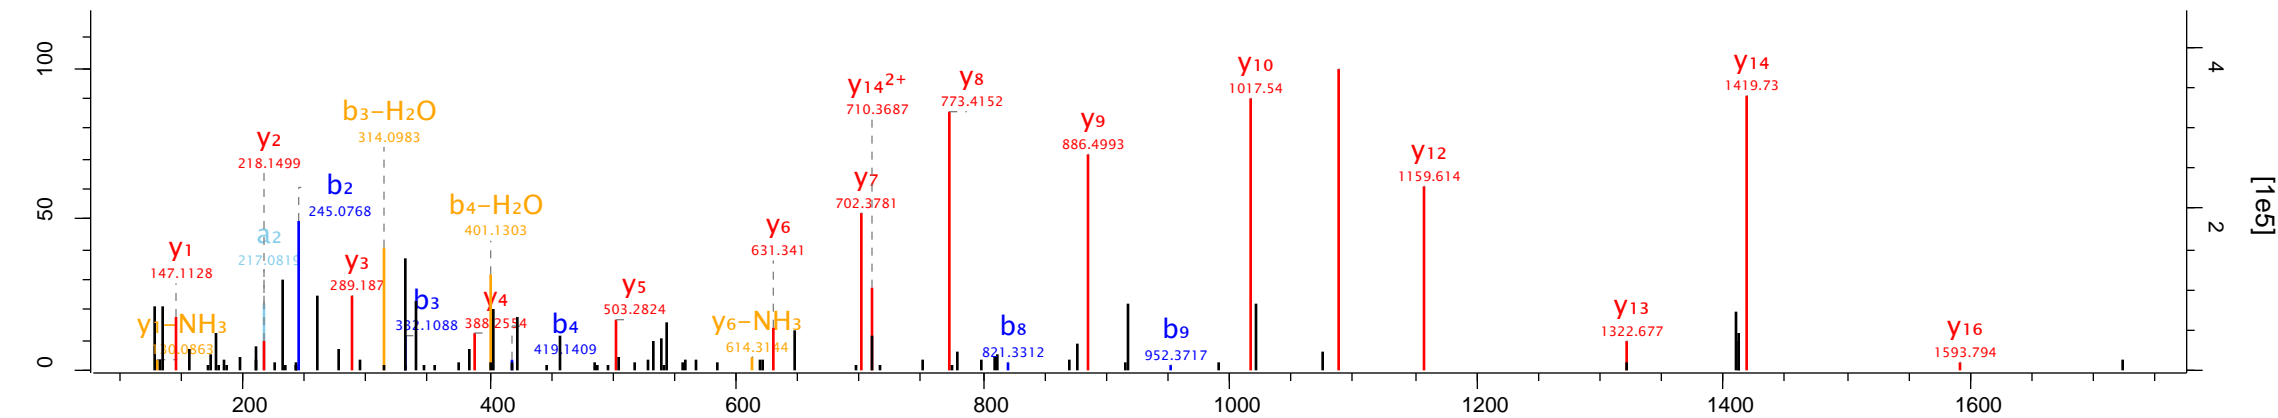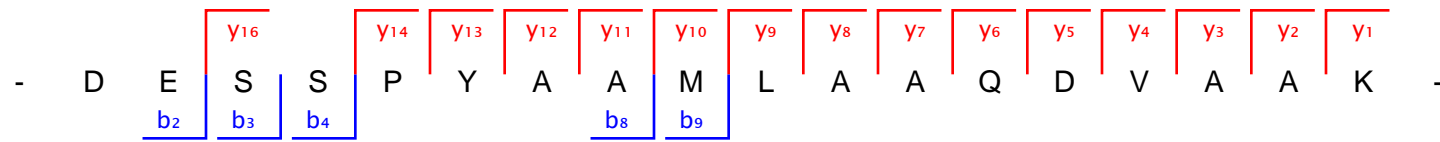

Raw file Scan Method Score m/z Gene names

20140608\_QEp4\_FaHo\_QC\_YNG1\_03 2245 FTMS; HCD 104.2 474.25 RPL36A

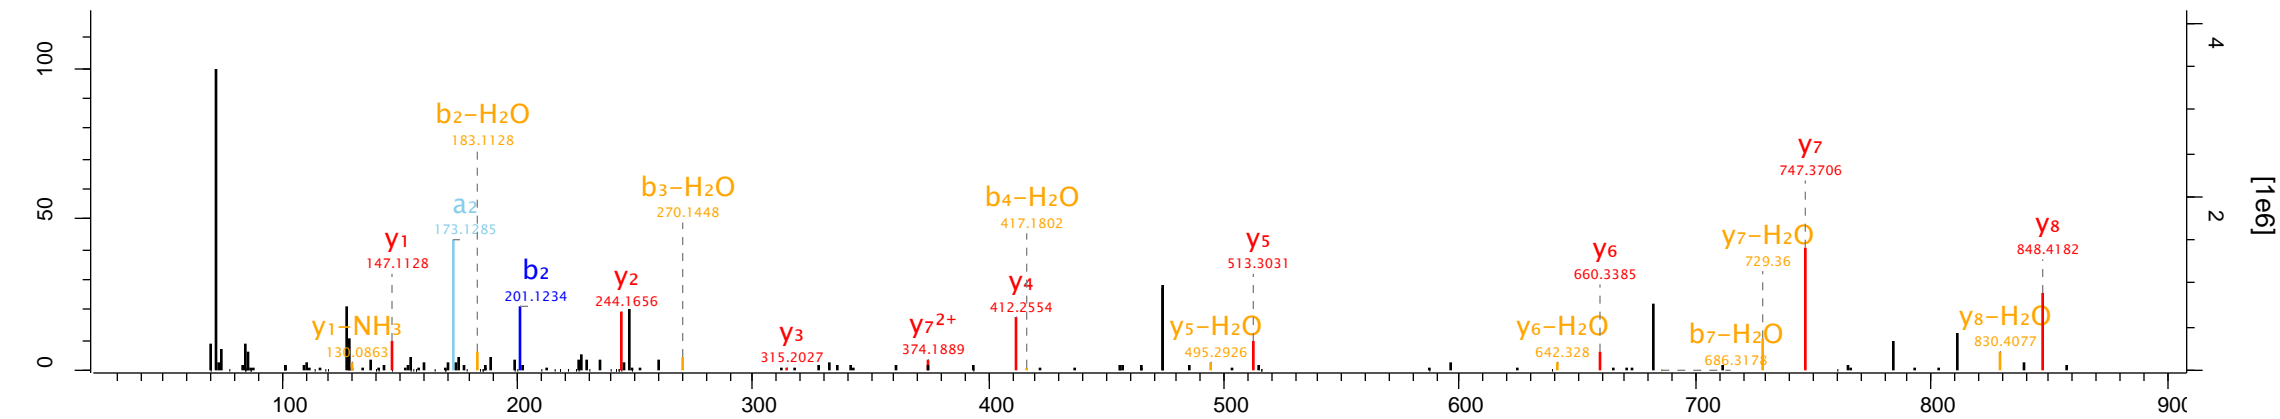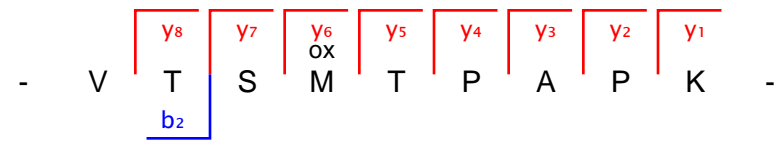



| Raw file                      | Scan | Method    | Score  | m/z    | Gene names  |
|-------------------------------|------|-----------|--------|--------|-------------|
| 20140608_QEp4_FaHo_QC_YNG1_03 | 2996 | FTMS; HCD | 177.44 | 662.32 | RPL7A;RPL7B |

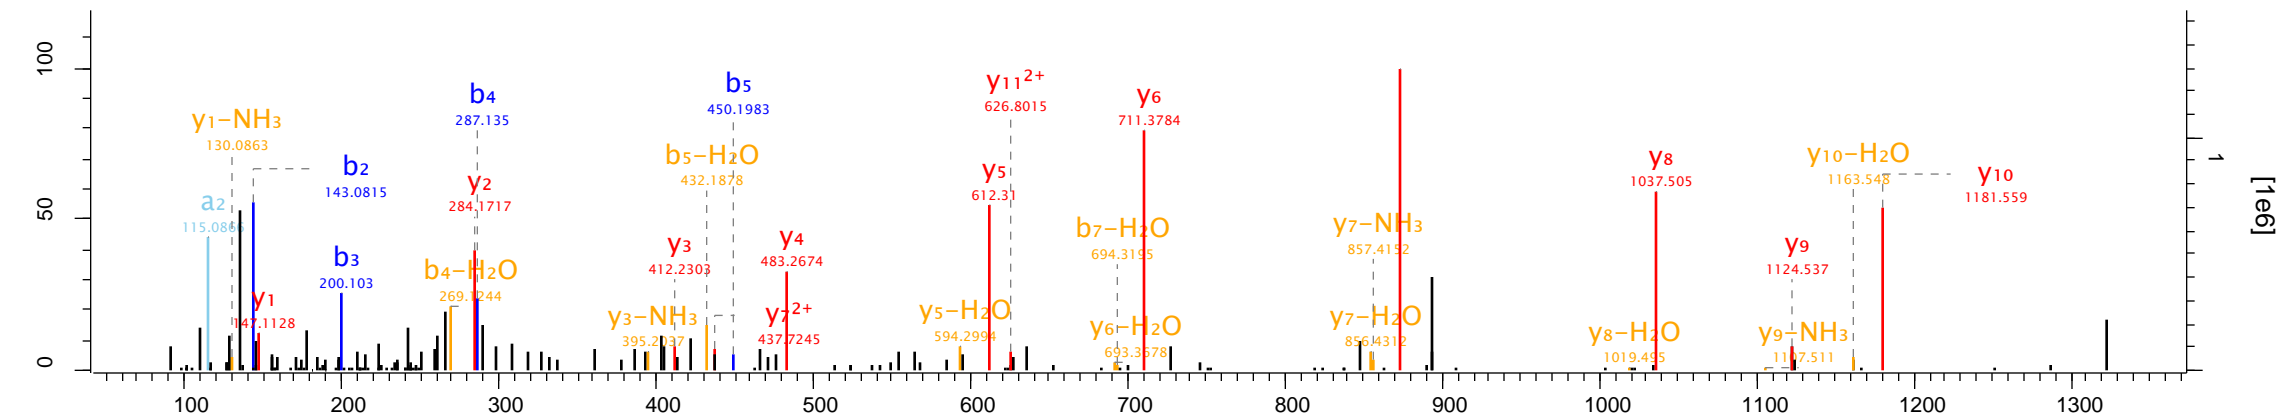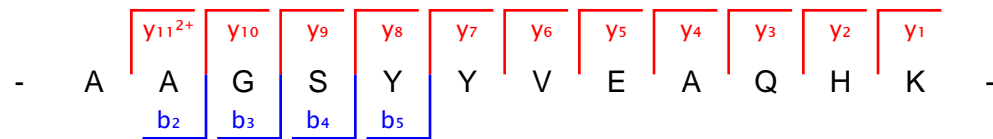

Raw file

Scan

Method

Score

m/z

Gene names

20140608\_QEp4\_FaHo\_QC\_YNG1\_03

4699

FTMS; HCD

103.55

490.26

ACB1

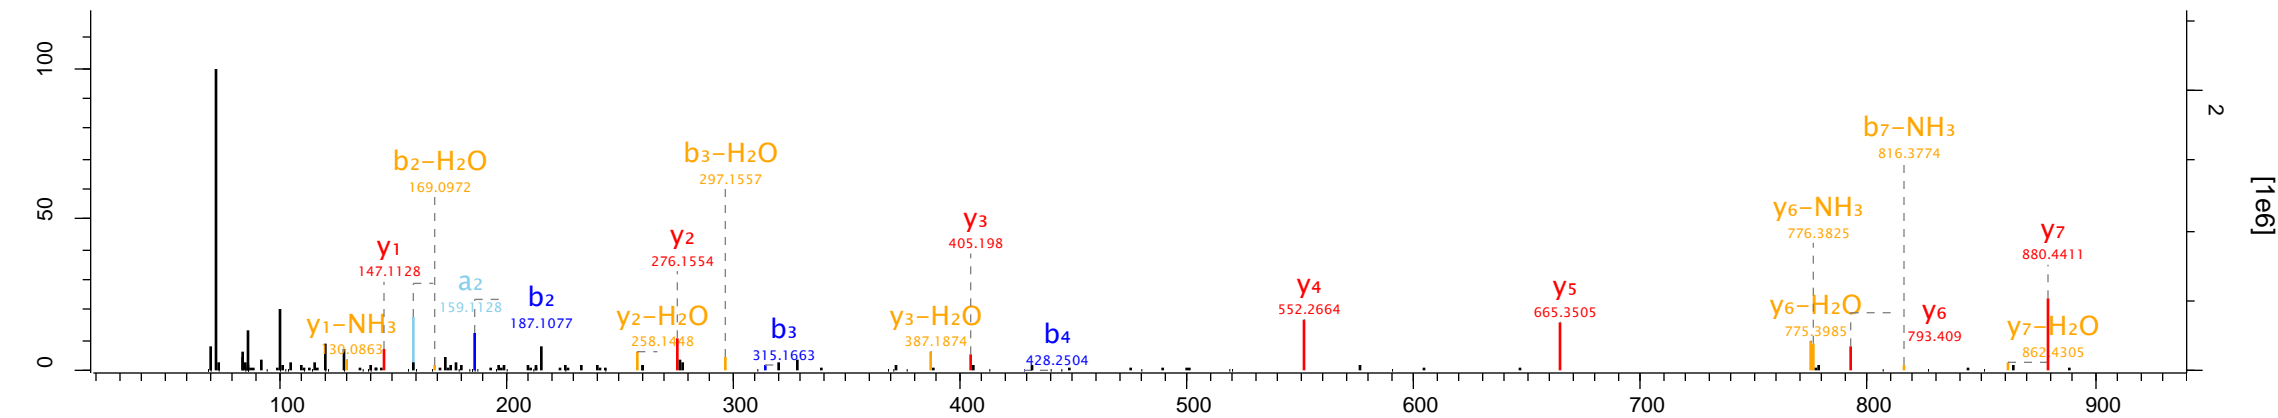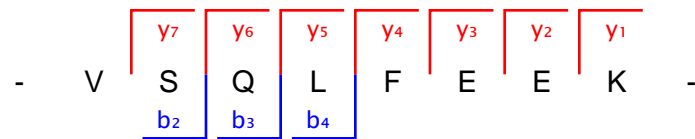

Raw file Scan Method Score m/z Gene names

20140608\_QEp4\_FaHo\_QC\_YNG1\_03

5472 FTMS; HCD 153.75 572.97 RPL4A

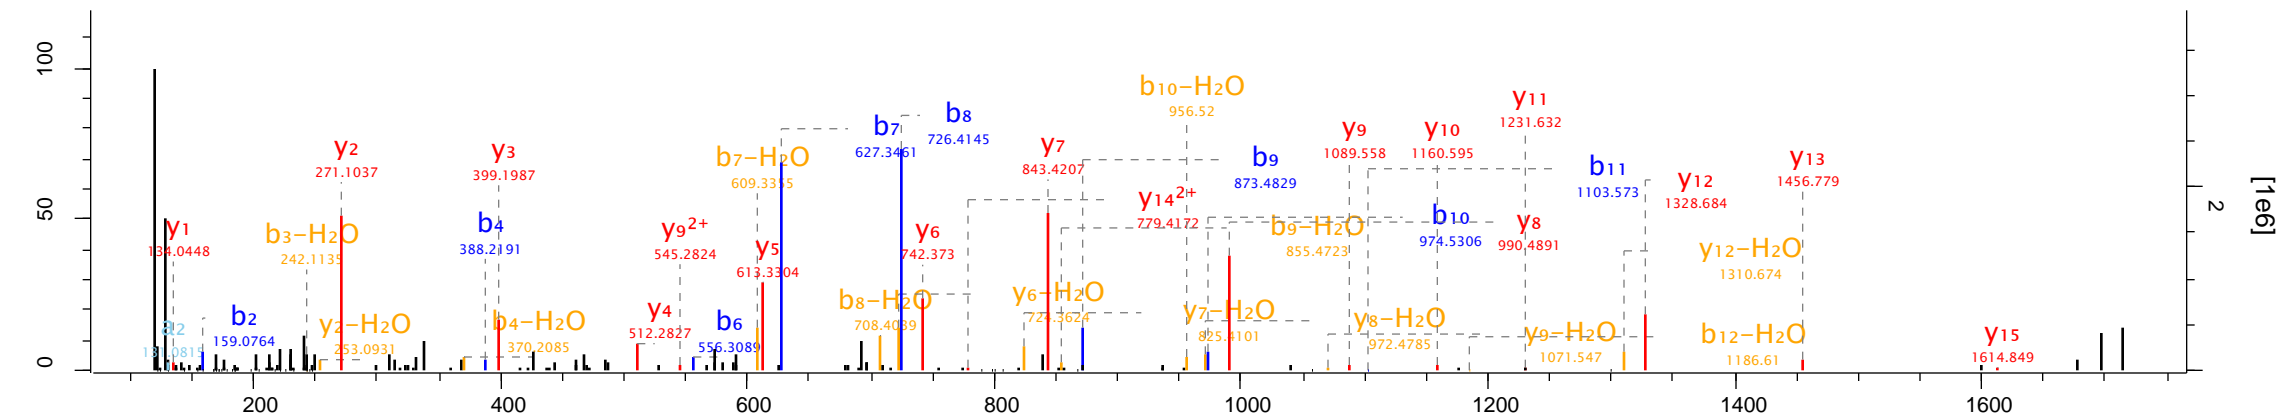

- T G T K P A A V F T E T L K H D -

Fragmentation mapping: b<sub>2</sub> (under G), b<sub>4</sub> (under K), b<sub>6</sub> (under A), b<sub>7</sub> (under A), b<sub>8</sub> (under V), b<sub>9</sub> (under F), b<sub>10</sub> (under T), b<sub>11</sub> (under E).

Fragmentation mapping: y<sub>15</sub> (over T), y<sub>14</sub><sup>2+</sup> (over T), y<sub>13</sub> (over K), y<sub>12</sub> (over P), y<sub>11</sub> (over A), y<sub>10</sub> (over A), y<sub>9</sub> (over V), y<sub>8</sub> (over F), y<sub>7</sub> (over T), y<sub>6</sub> (over E), y<sub>5</sub> (over T), y<sub>4</sub> (over L), y<sub>3</sub> (over K), y<sub>2</sub> (over H), y<sub>1</sub> (over D).

| Raw file                      | Scan | Method    | Score  | m/z   | Gene names  |
|-------------------------------|------|-----------|--------|-------|-------------|
| 20140608_QEp4_FaHo_QC_YNG2_01 | 3406 | FTMS; HCD | 131.12 | 423.9 | RPS0B;RPS0A |

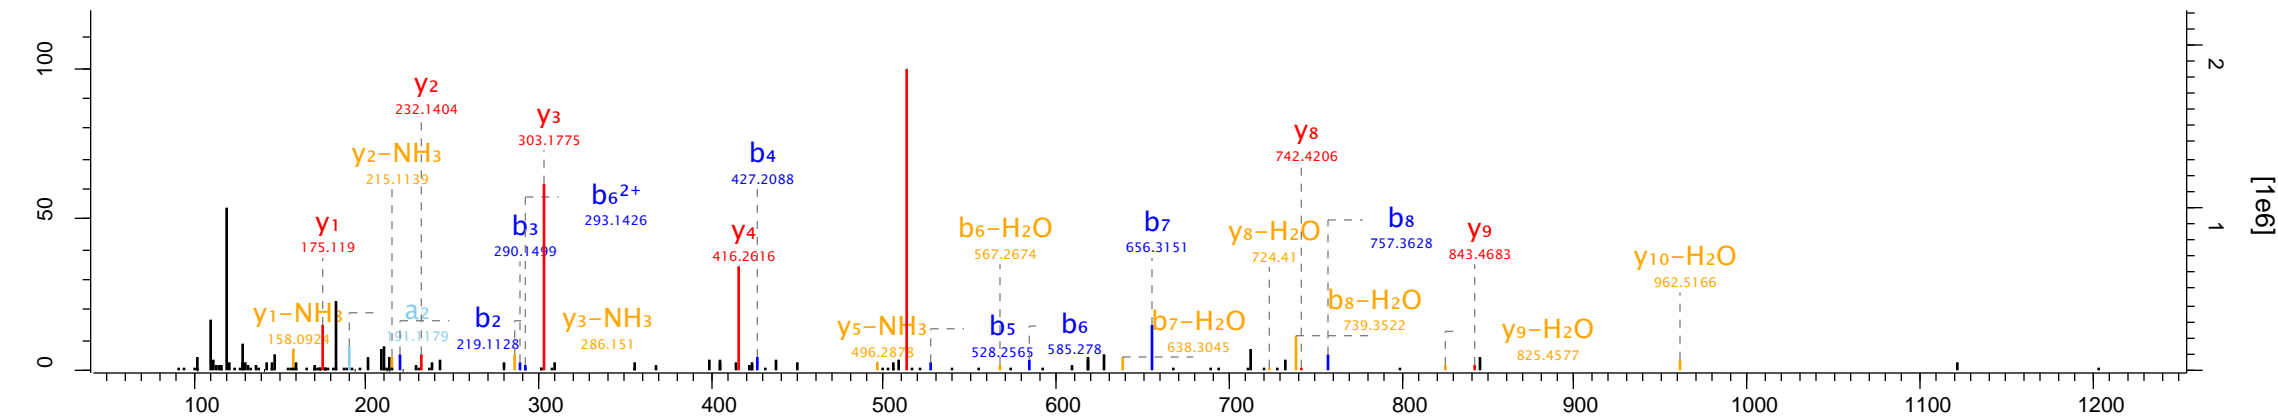

- F A A H T G A T P I A G R -

b<sub>2</sub> b<sub>3</sub> b<sub>4</sub> b<sub>5</sub> b<sub>6</sub> b<sub>7</sub> b<sub>8</sub> y<sub>9</sub> y<sub>8</sub> y<sub>5</sub> y<sub>4</sub> y<sub>3</sub> y<sub>2</sub> y<sub>1</sub>

Raw file Scan Method Score m/z Gene names

20140608\_QEp4\_FaHo\_QC\_YNG2\_01 4241 FTMS; HCD 118.19 573.63 MBF1

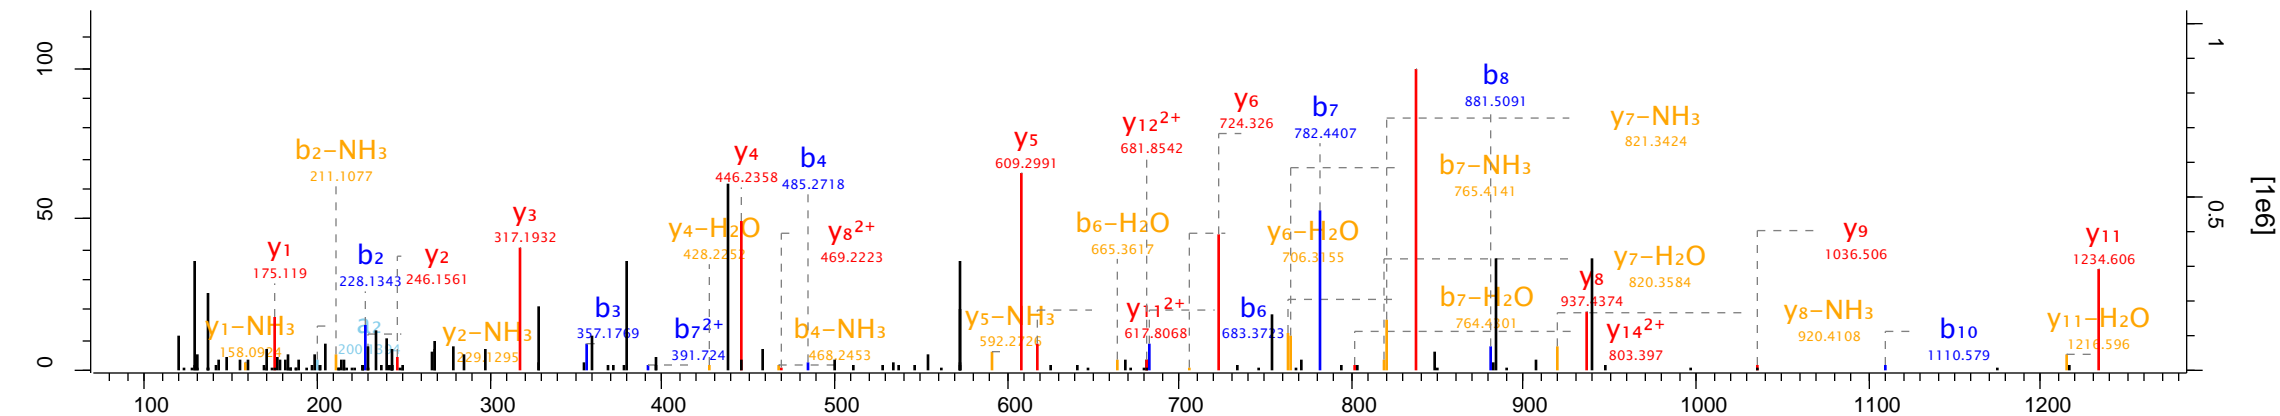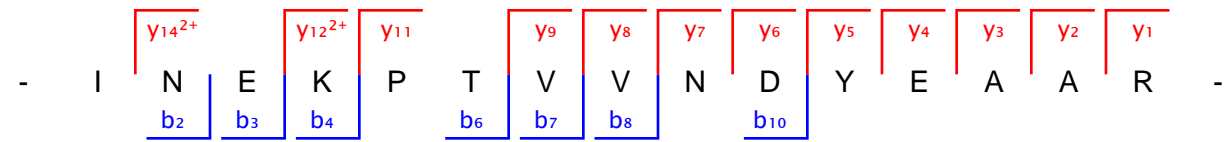

| Raw file                      | Scan | Method    | Score | m/z    | Gene names    |
|-------------------------------|------|-----------|-------|--------|---------------|
| 20140608_QEp4_FaHo_QC_YNG2_02 | 2818 | FTMS; HCD | 60.08 | 389.21 | RPL17A;RPL17B |

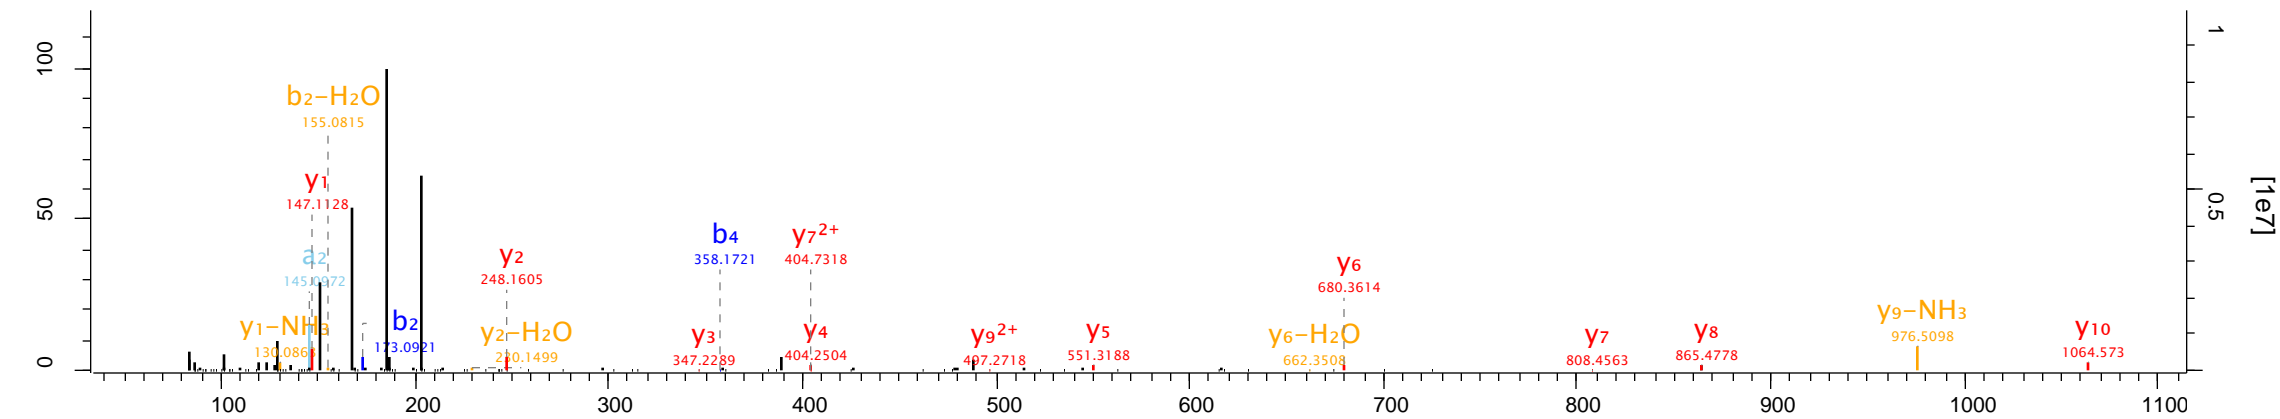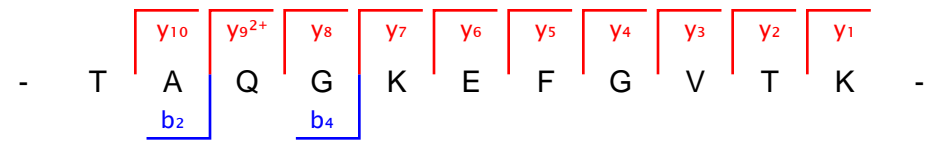

Raw file Scan Method Score m/z Gene names  
 20140608\_QEp4\_FaHo\_QC\_YNG2\_02 2950 FTMS; HCD 187.63 787.37 RPL7A;RPL7B

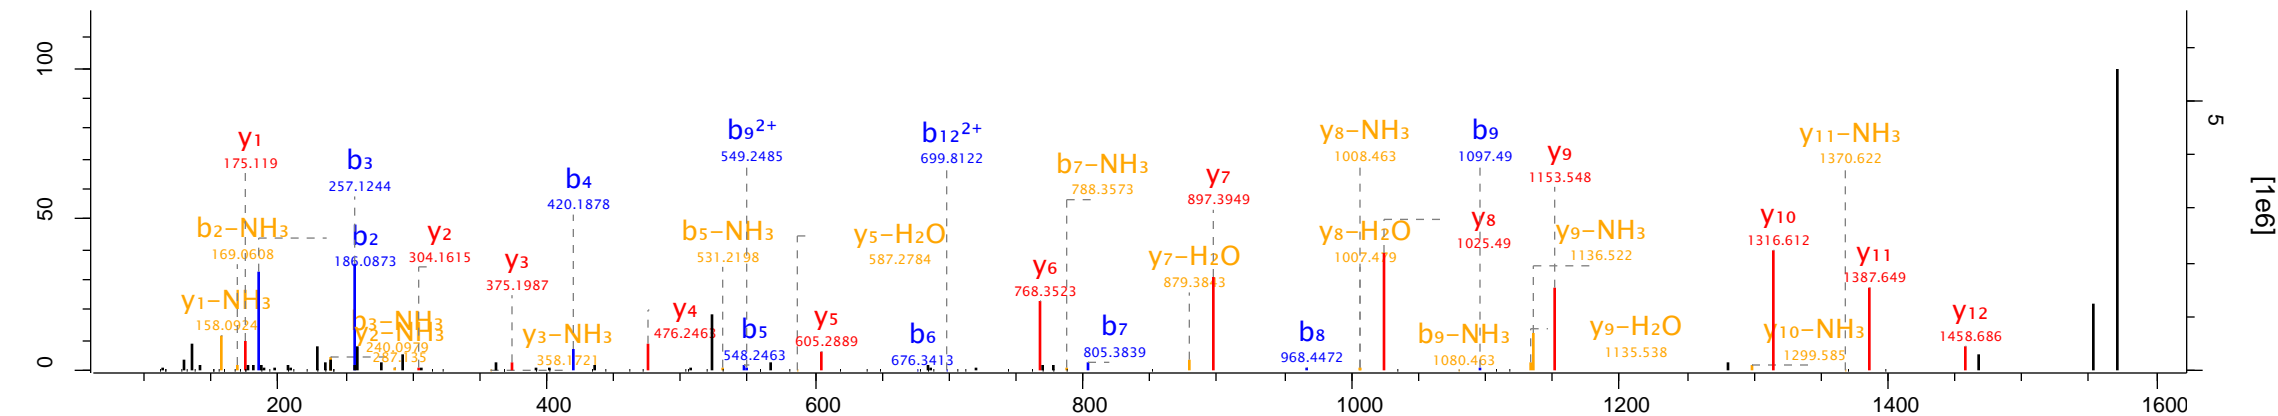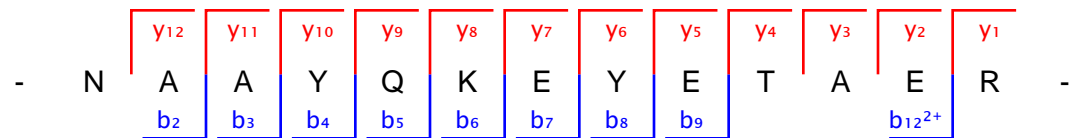

| Raw file                      | Scan | Method    | Score | m/z    | Gene names    |
|-------------------------------|------|-----------|-------|--------|---------------|
| 20140608_QEp4_FaHo_QC_YNG2_02 | 2956 | FTMS; HCD | 86.34 | 376.88 | RPL13B;RPL13A |

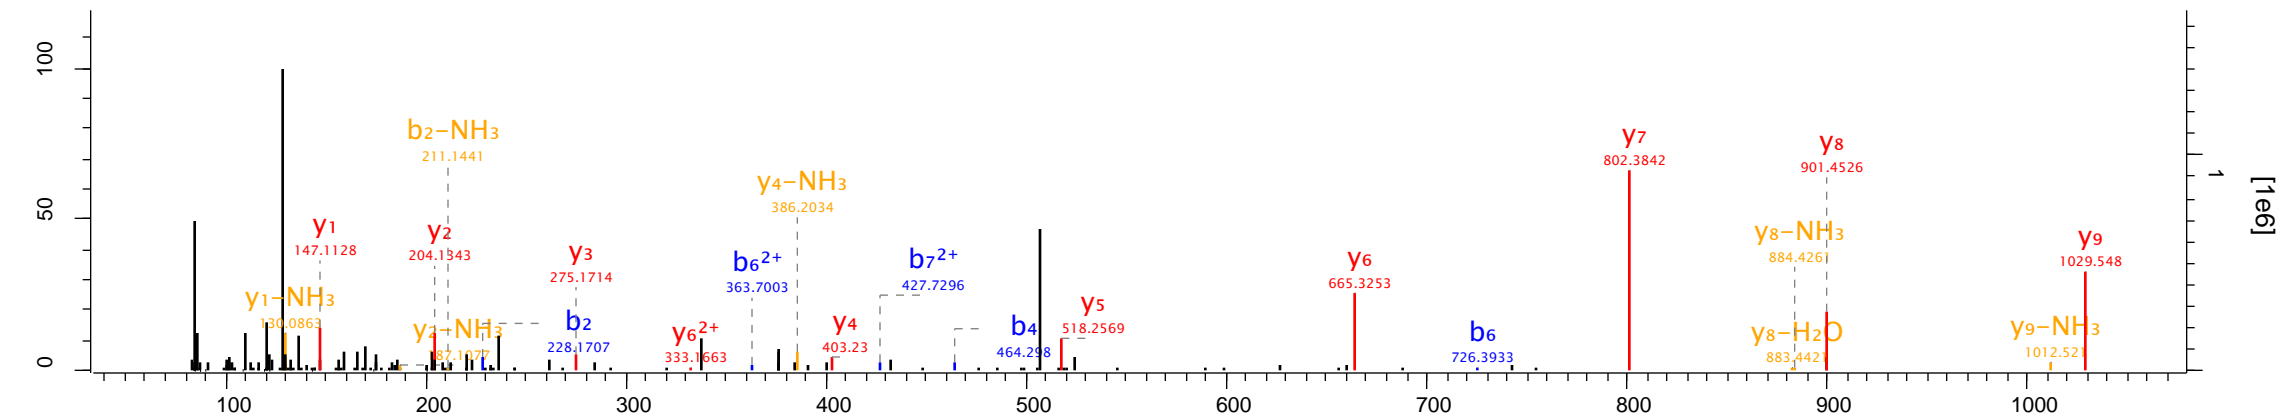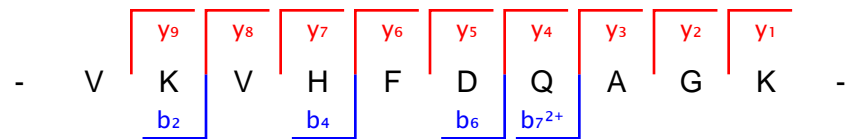



20140608\_QEp4\_FaHo\_Q3841 FTMS;2 143.1415 TY1B-ML1;TY1B-BR;TY1A-PR1;TY1A-A;TY1A-DR4;TY1B-H;TY1B-MR2;TY1B-OR;TY1B-DR1;TY1B-NL2;TY1B-PR2;TY1B-DR5;TY1B-PR1;TY1B-JR2;TY1A-PL;TY1A-LR2;TY1A

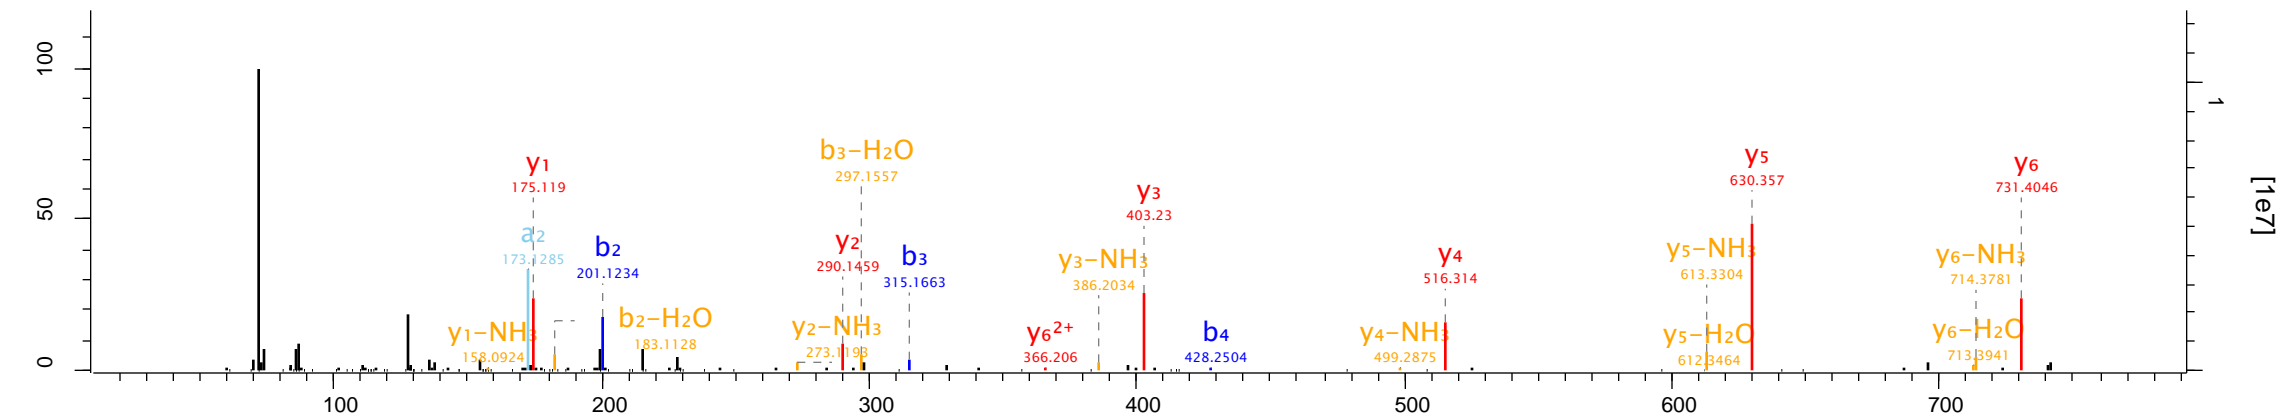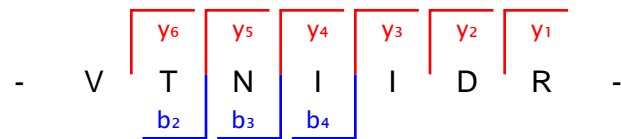

Raw file Scan Method Score m/z Gene names

20140608\_QEp4\_FaHo\_QC\_YNG2\_02

4972 FTMS; HCD 164.66 644.33 RPL17B

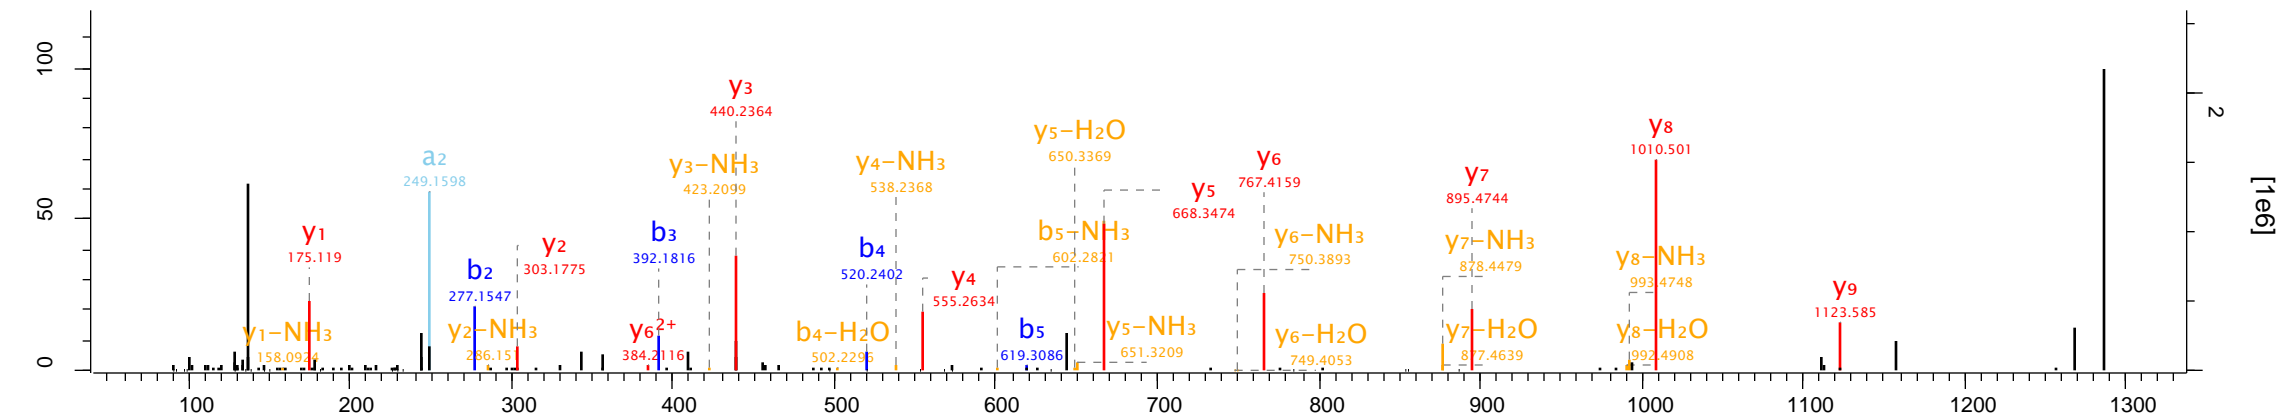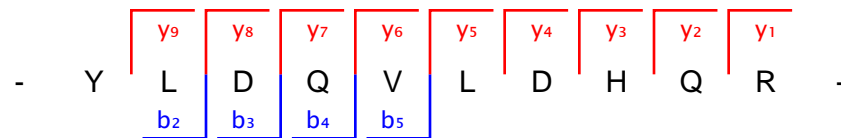

Raw file Scan Method Score m/z Gene names

20140608\_QEp4\_FaHo\_QC\_YNG2\_02

4980

FTMS; HCD

120.4

718.01

TAT1

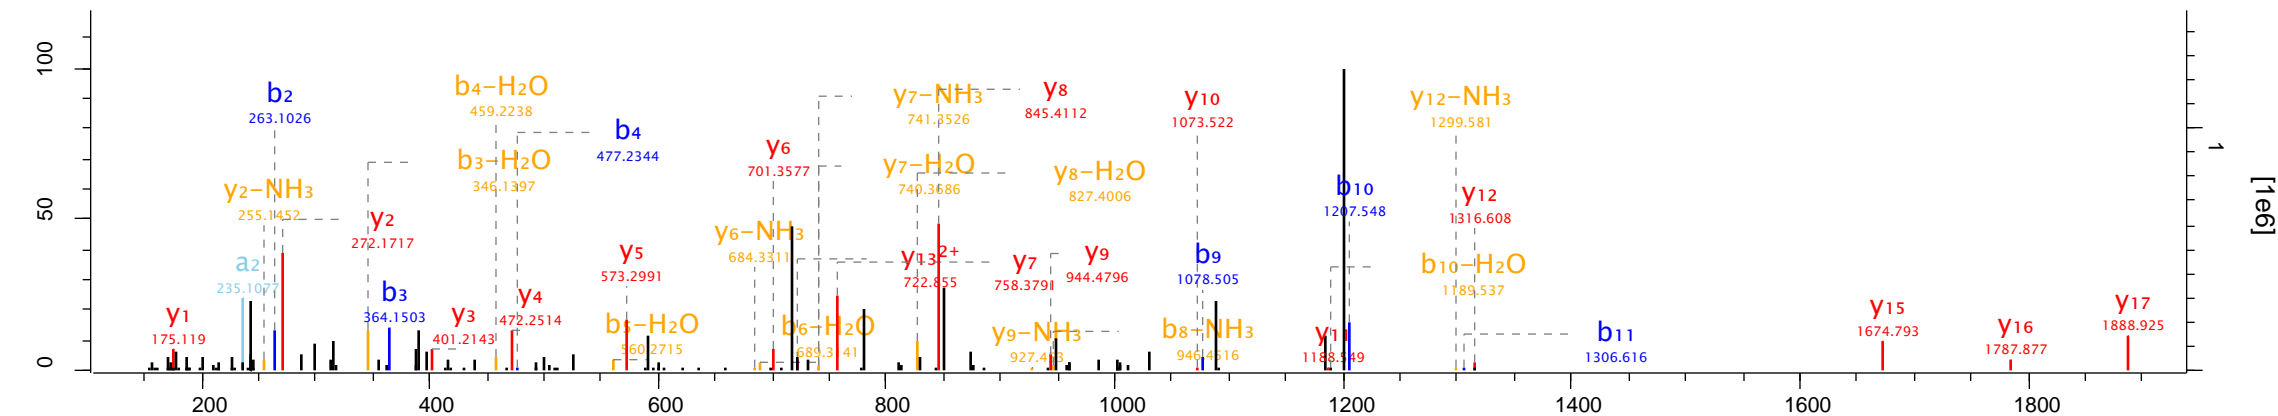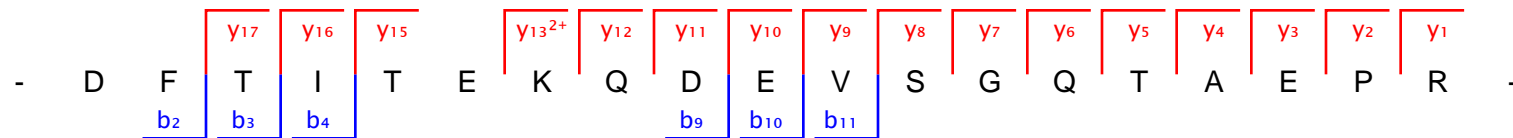

Raw file

Scan

Method

Score

m/z

Gene names

20140608\_QEp4\_FaHo\_QC\_YNG2\_02

5216

FTMS; HCD

221.55

667.33

RPP2A

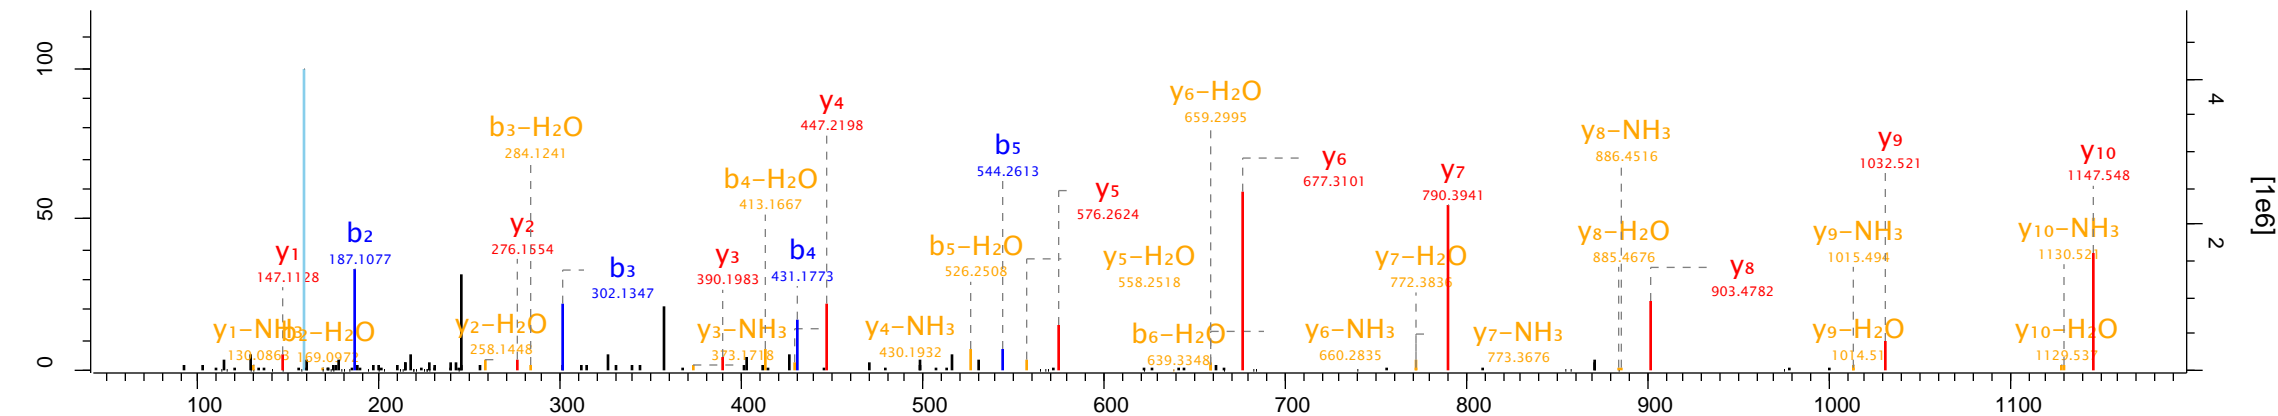

-

S

V

D

E

L

I

T

E

G

N

E

K

-

y10

y9

y8

y7

y6

y5

y4

y3

y2

y1

b2

b3

b4

b5

Raw file 20140608\_QEp4\_FaHo\_QC\_YNG2\_02 Scan 5224 Method FTMS; HCD Score 183.36 m/z 871.46 Gene names RPS14B;RPS14A

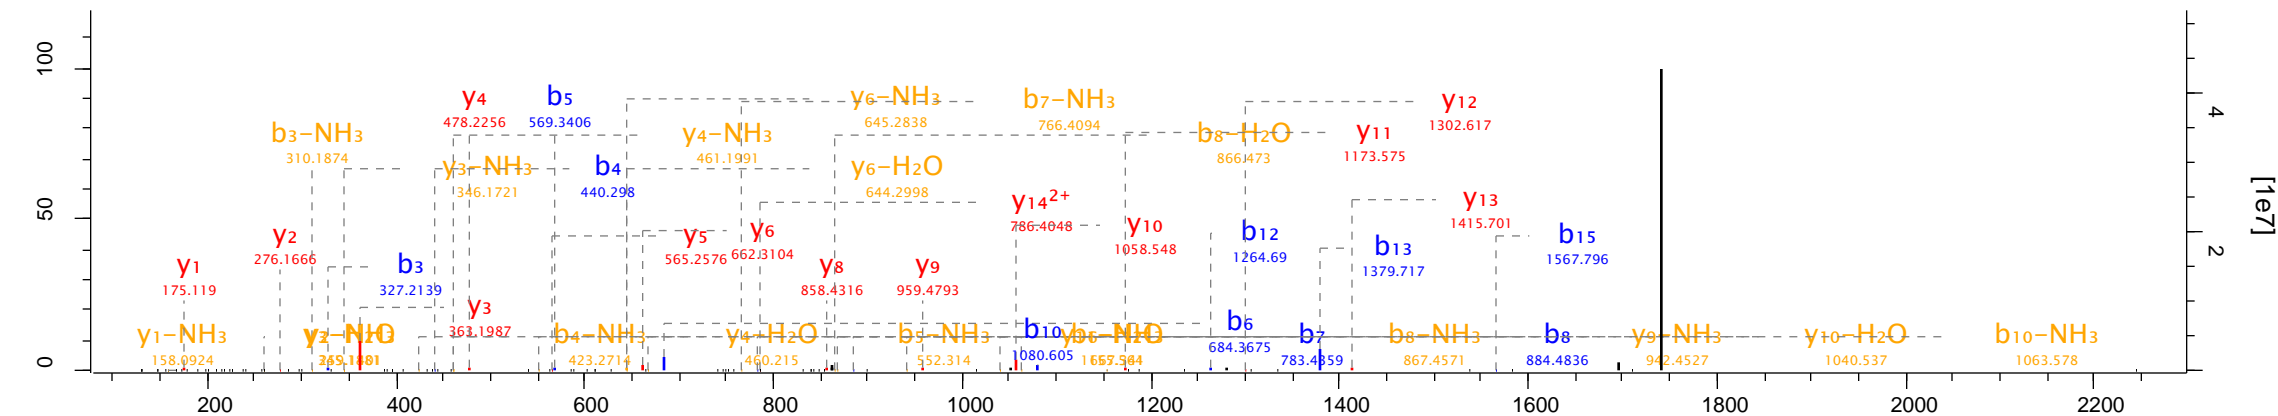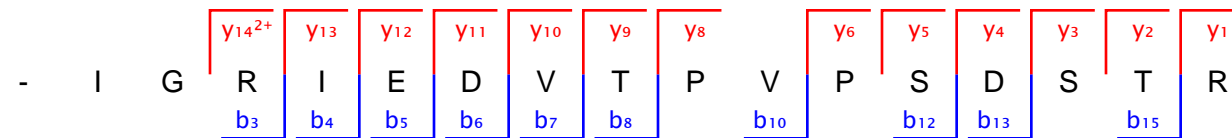

| Raw file                      | Scan | Method    | Score | m/z    | Gene names    |
|-------------------------------|------|-----------|-------|--------|---------------|
| 20140608_QEp4_FaHo_QC_YNG2_02 | 5254 | FTMS; HCD | 72.97 | 453.73 | RPL14B;RPL14A |

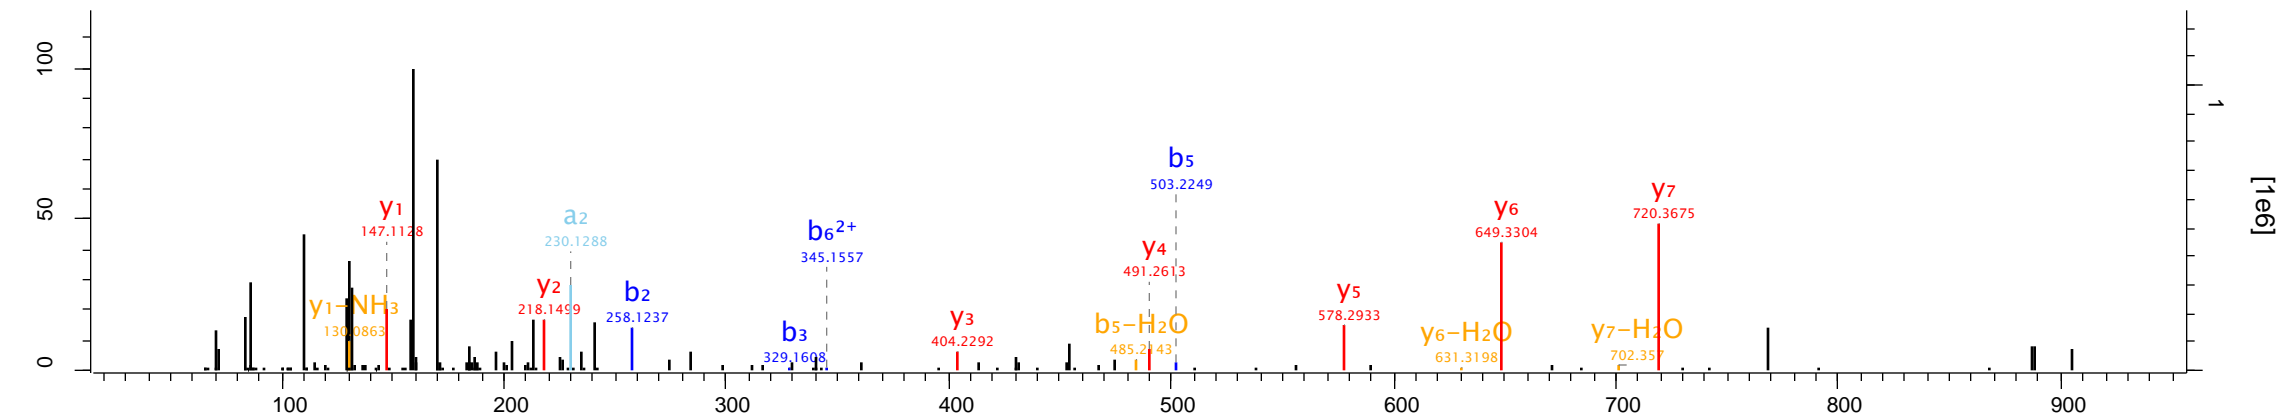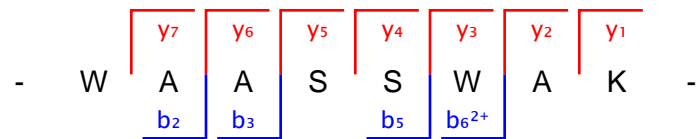

20140608\_QEp4\_FaHc 521 FTMS; 2 126.447 TY1B-ML1;TY1B-H;TY1B-MR2;TY1B-DR1;TY1B-PR2;TY1B-DR5;TY1B-PR1;TY1B-JR2;TY1B-NL1;TY2B-C;TY1B-OL;TY1B-LR4;TY1B-ML2;TY1B-DR3;TY1B-PR3;TY1B-PL;TY1B-LR2;

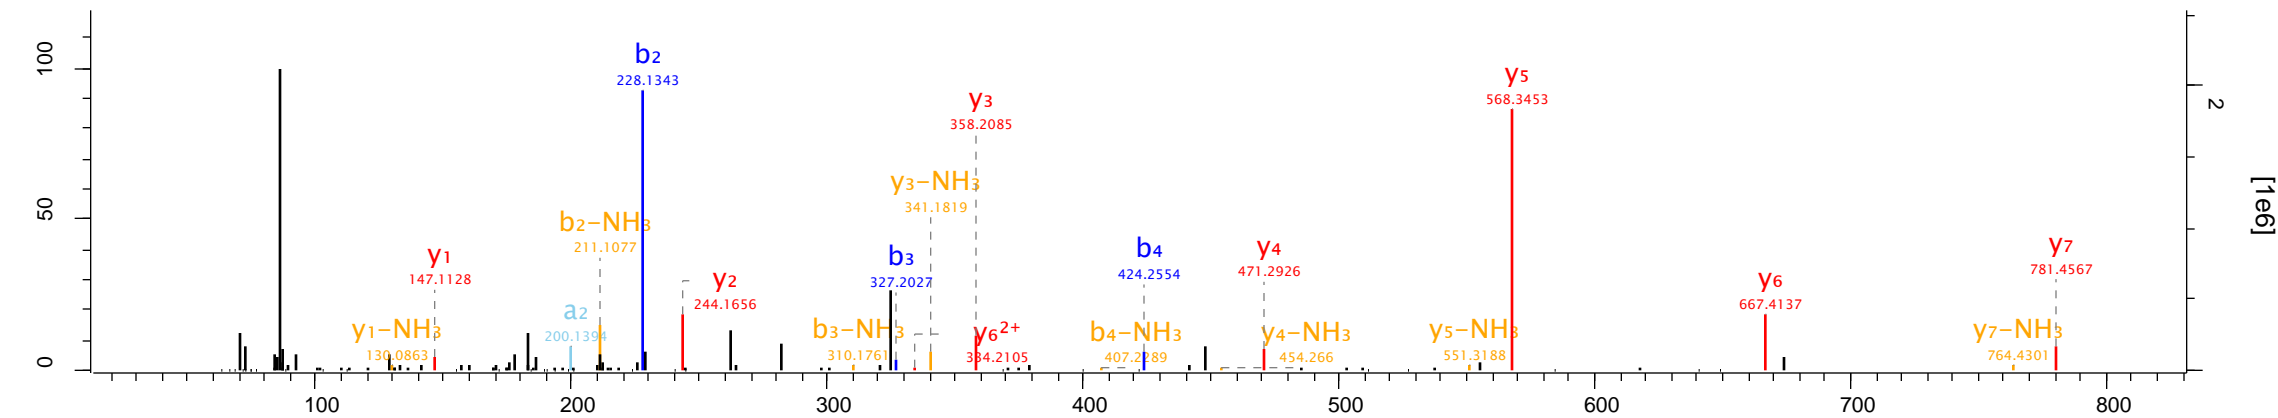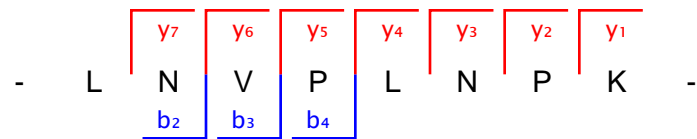

Raw file Scan Method Score m/z Gene names  
 20140608\_QEp4\_FaHo\_QC\_YNG2\_02 5825 FTMS; HCD 134.3 596.82 FEN1

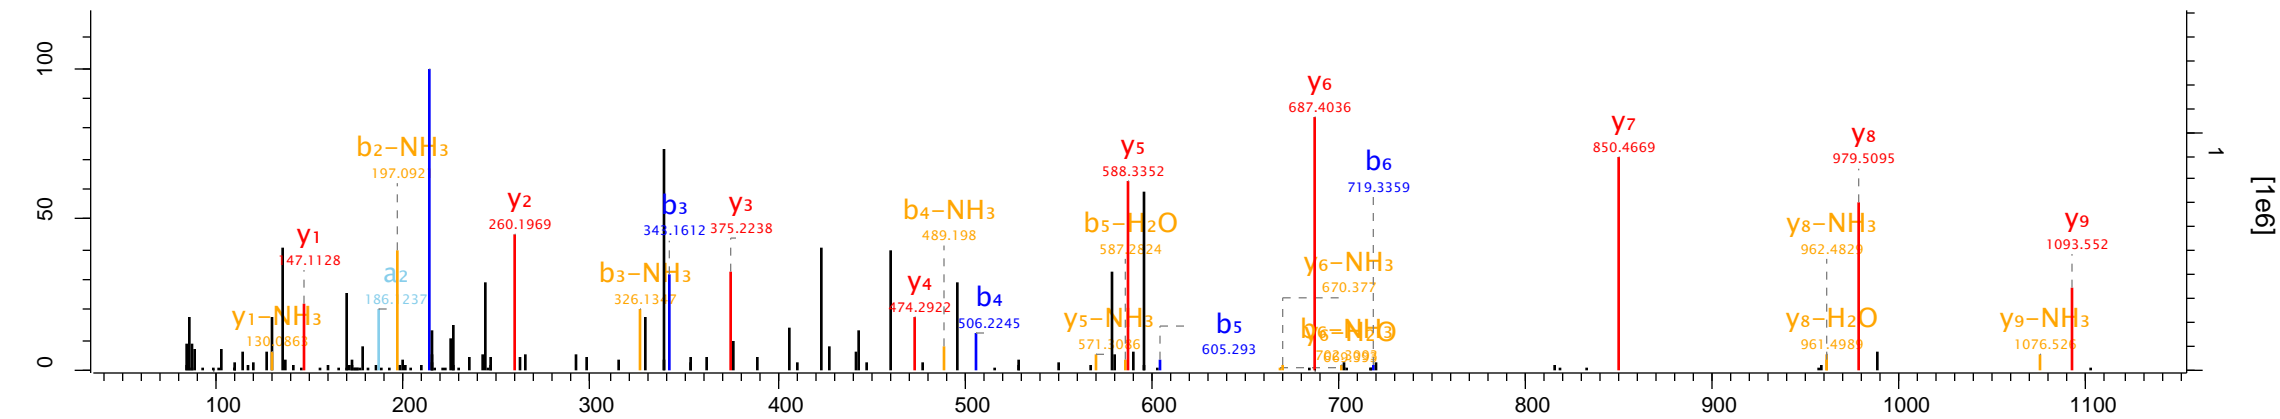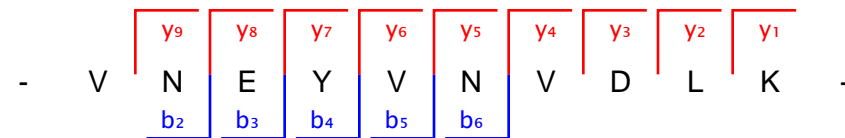



Raw file

Scan

Method

Score

m/z

Gene names

20140608\_QEp4\_FaHo\_QC\_YNG2\_02

5888

FTMS; HCD

246.77

888.07

TY1B-BR;TY1B-H;TY1B-MR2;TY1B-OR;TY1B-DR1;TY1B-PR2;TY1B-DR5;TY1B-DR3

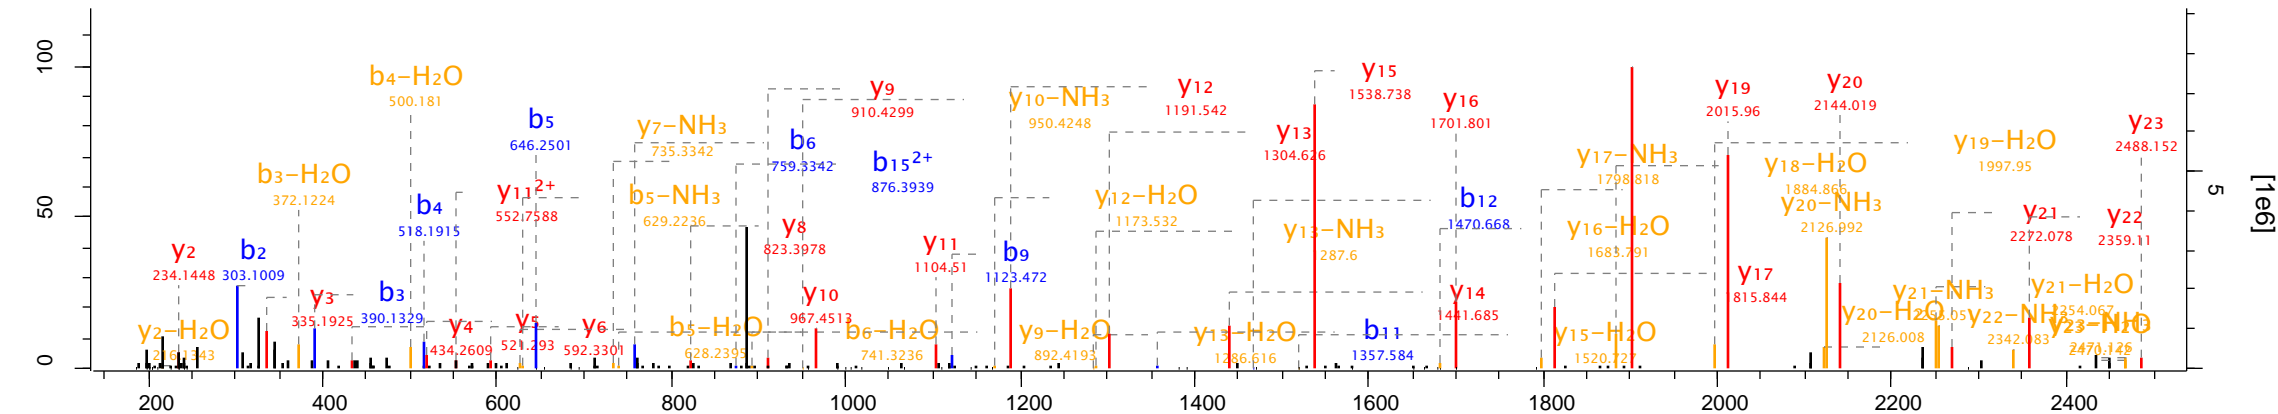

[1e6]

ac

M E S Q Q L S N Y P H I S H G S A C A S V T S K -

b<sub>2</sub> b<sub>3</sub> b<sub>4</sub> b<sub>5</sub> b<sub>6</sub> b<sub>9</sub> b<sub>11</sub> b<sub>12</sub> b<sub>15</sub><sup>2+</sup>

y<sub>23</sub> y<sub>22</sub> y<sub>21</sub> y<sub>20</sub> y<sub>19</sub> y<sub>18</sub> y<sub>17</sub> y<sub>16</sub> y<sub>15</sub> y<sub>14</sub> y<sub>13</sub> y<sub>12</sub> y<sub>11</sub> y<sub>10</sub> y<sub>9</sub> y<sub>8</sub> y<sub>6</sub> y<sub>5</sub> y<sub>4</sub> y<sub>3</sub> y<sub>2</sub>

Raw file Scan Method Score m/z Gene names

20140608\_QEp4\_FaHo\_QC\_YNG2\_02 6441 FTMS; HCD 121.18 808.85 CAF20

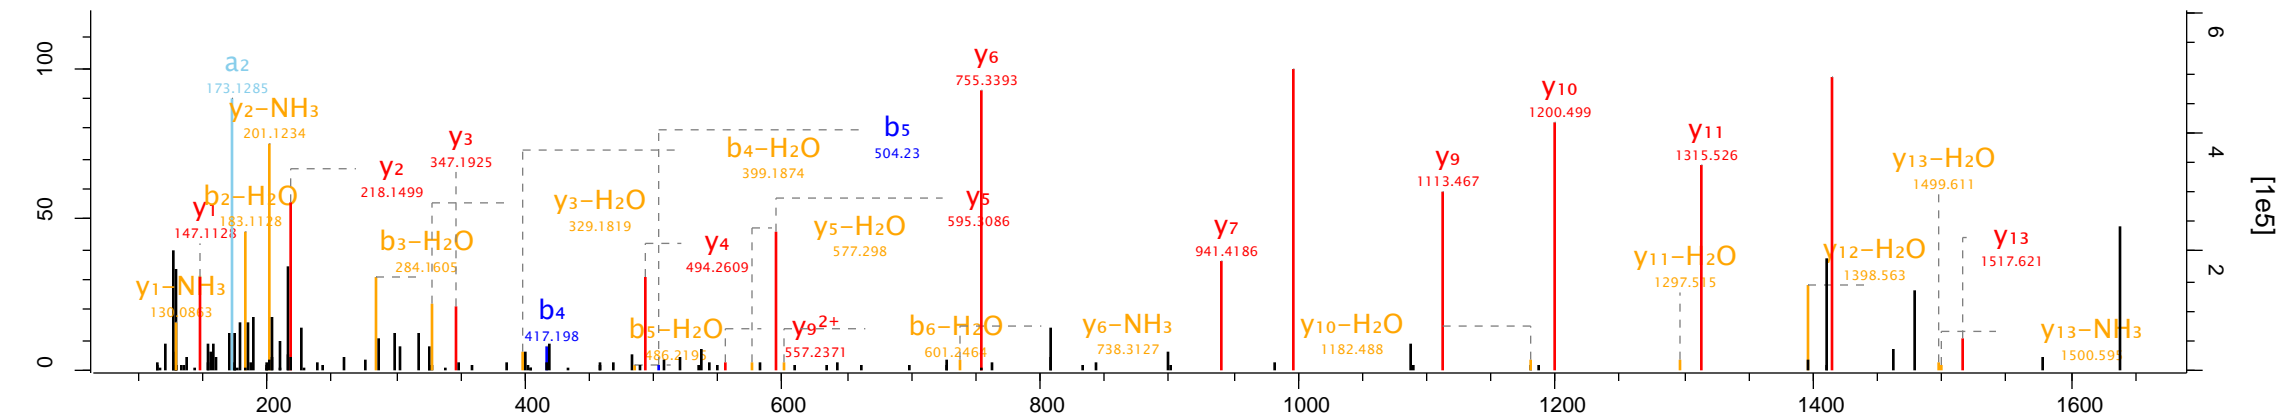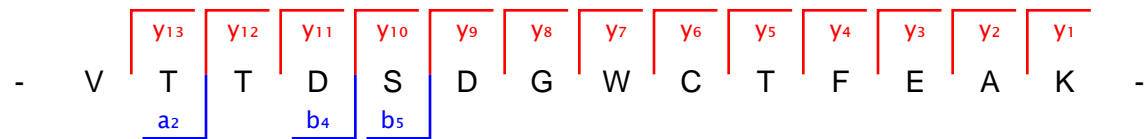

| Raw file                      | Scan | Method    | Score  | m/z    | Gene names    |
|-------------------------------|------|-----------|--------|--------|---------------|
| 20140608_QEp4_FaHo_QC_YNG2_02 | 6974 | FTMS; HCD | 107.74 | 494.96 | RPL24A;RPL24B |

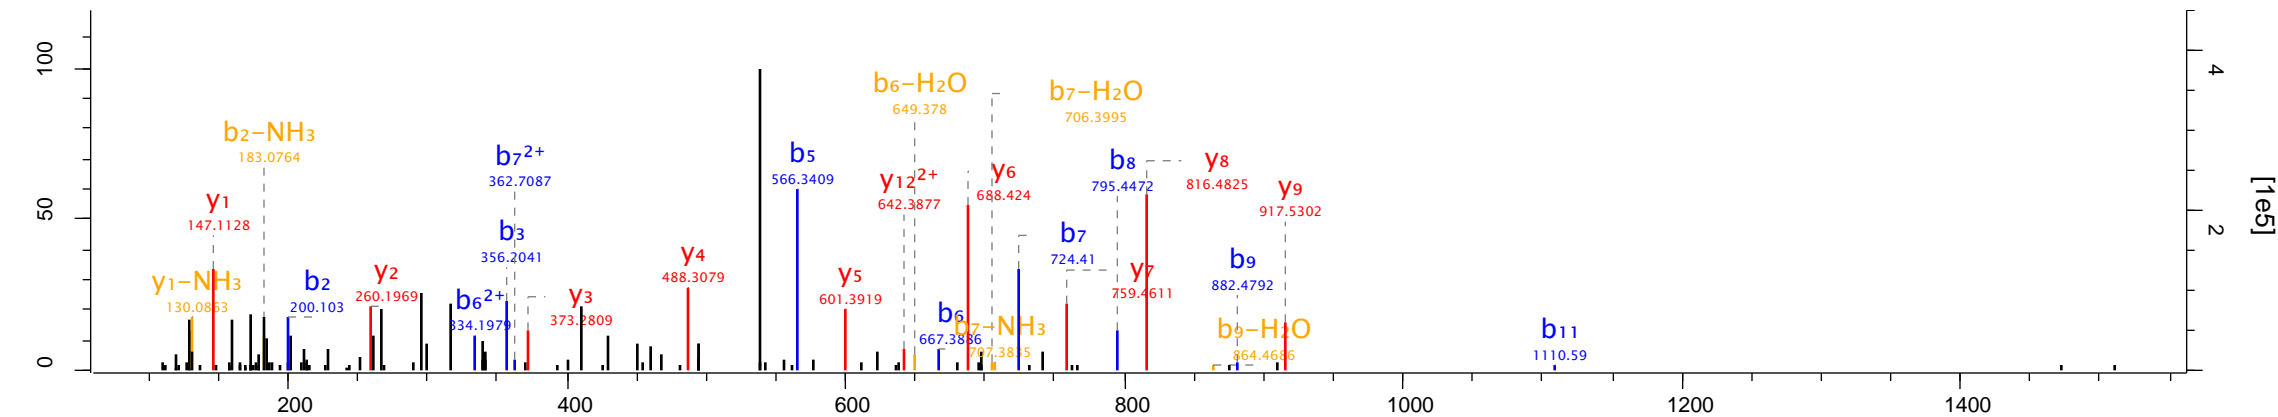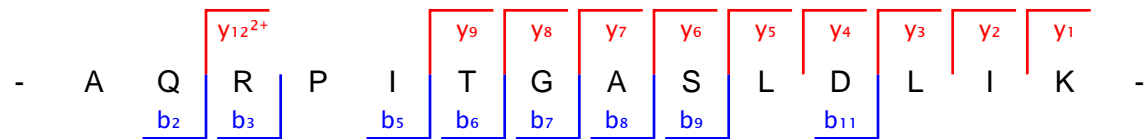

| Raw file                      | Scan | Method    | Score  | m/z    | Gene names    |
|-------------------------------|------|-----------|--------|--------|---------------|
| 20140608_QEp4_FaHo_QC_YNG2_02 | 7183 | FTMS; HCD | 120.06 | 480.28 | RPL31A;RPL31B |

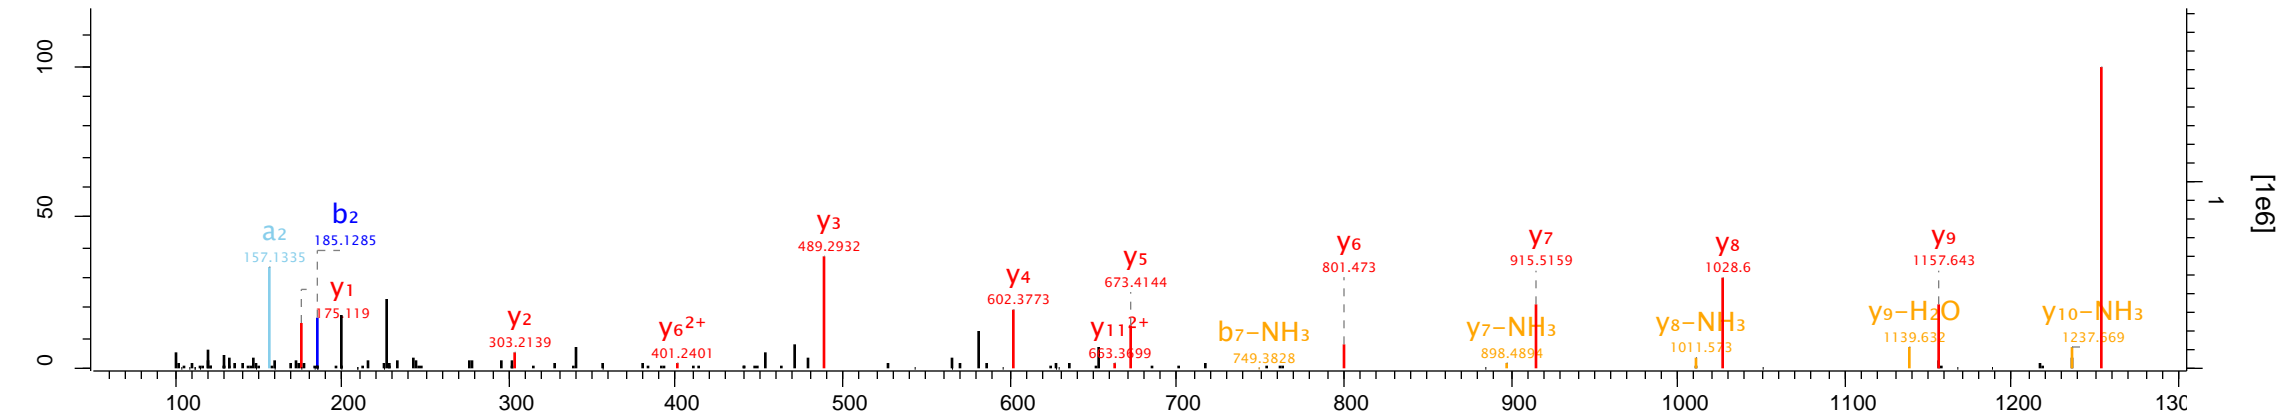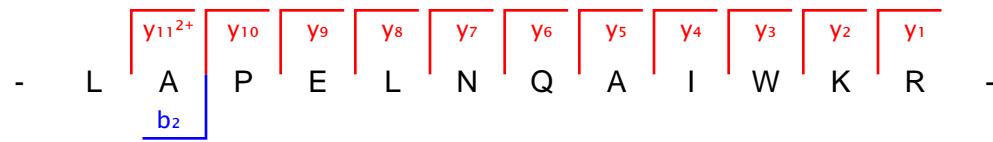

Raw file Scan Method Score m/z Gene names

20140608\_QEp4\_FaHo\_QC\_YNG2\_02 7831 FTMS; HCD 116.51 681.86 RBL2

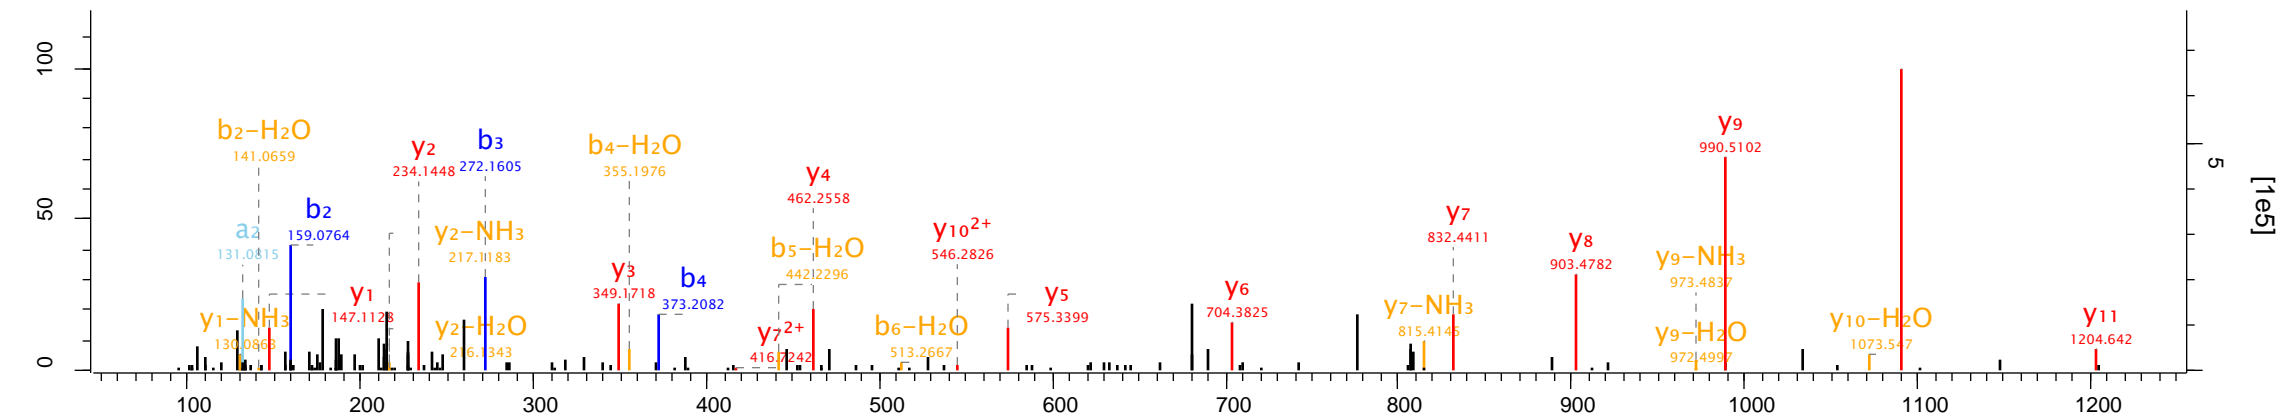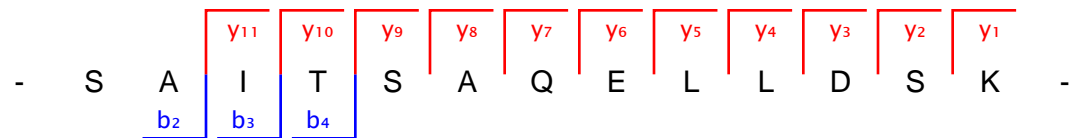

| Raw file                      | Scan | Method    | Score  | m/z    | Gene names    |
|-------------------------------|------|-----------|--------|--------|---------------|
| 20140608_QEp4_FaHo_QC_YNG2_03 | 2678 | FTMS; HCD | 128.44 | 487.78 | RPL24A;RPL24B |

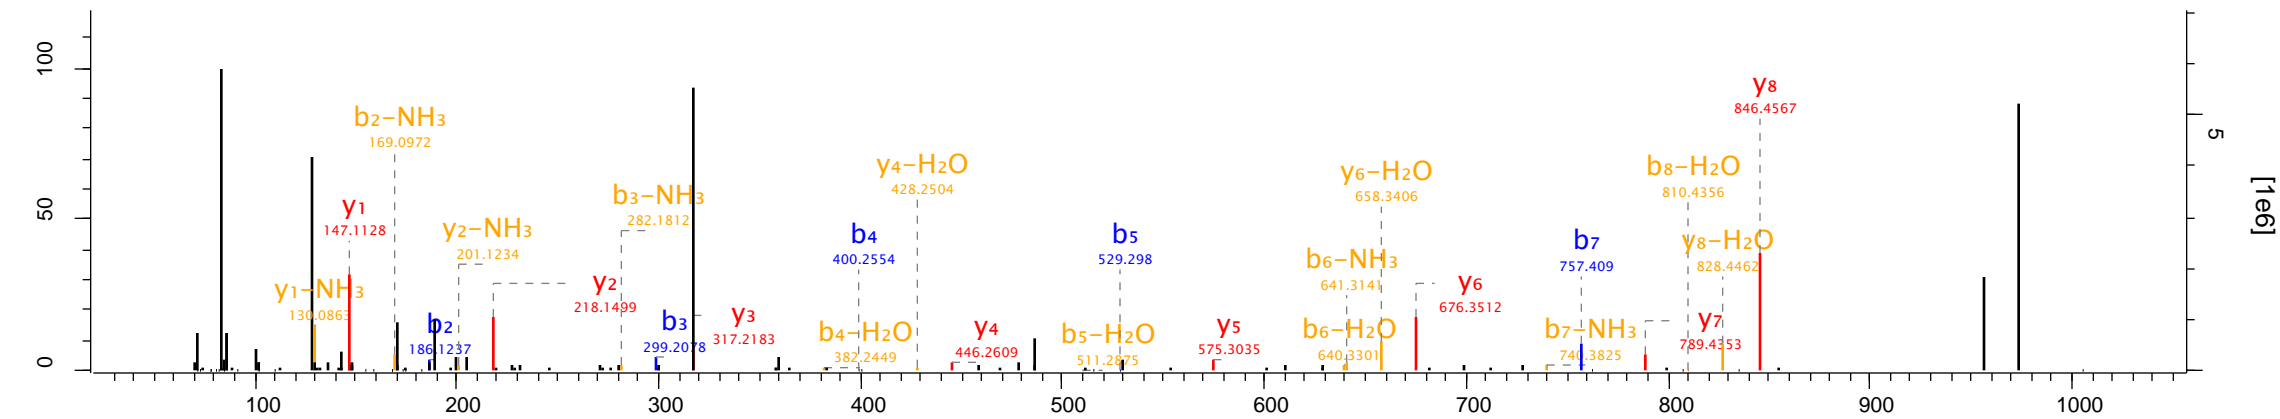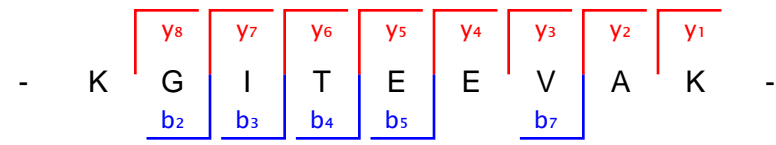

Raw file

Scan Method Score m/z Gene names

20140608\_QEp4\_FaHo\_QC\_YNG2\_03

2916 FTMS; HCD 125.75 494.76 RPL7B

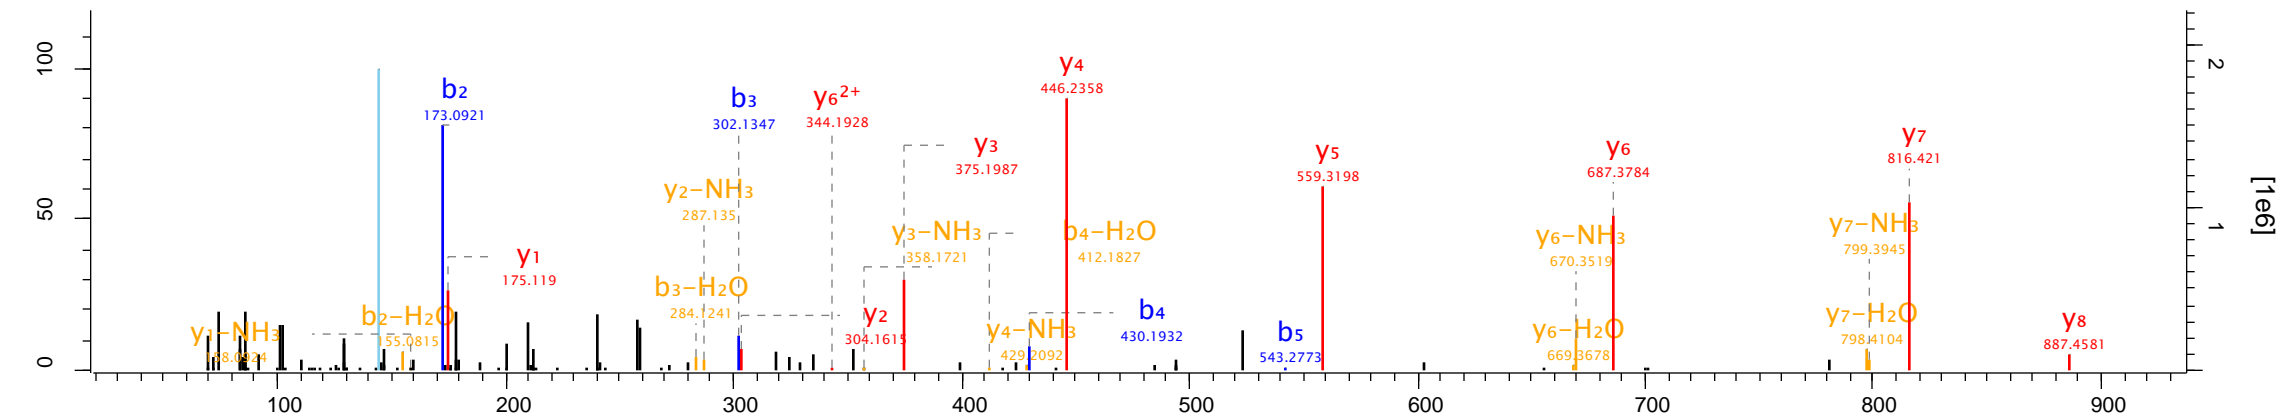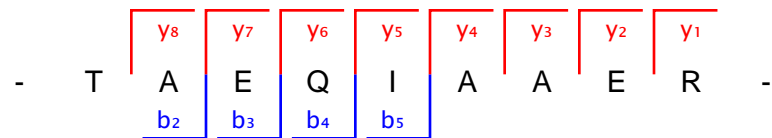

Raw file Scan Method Score m/z Gene names  
 20140608\_QEp4\_FaHo\_QC\_YNG2\_03 2947 FTMS; HCD 176.56 722.83 RPL4B;RPL4A

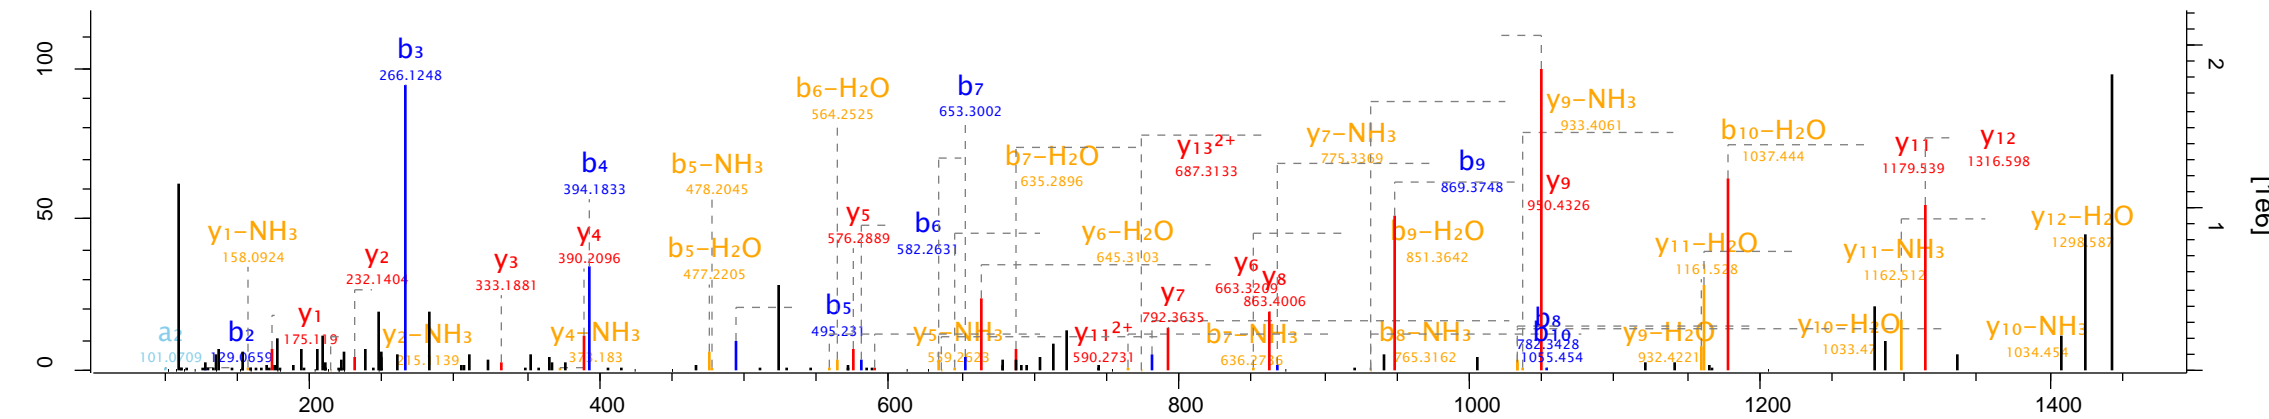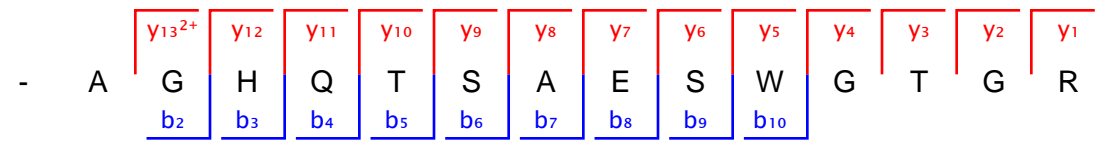



| Raw file                      | Scan | Method    | Score  | m/z    | Gene names    |
|-------------------------------|------|-----------|--------|--------|---------------|
| 20140608_QEp4_FaHo_QC_YNG2_03 | 3561 | FTMS; HCD | 138.24 | 394.23 | RPL31A;RPL31B |

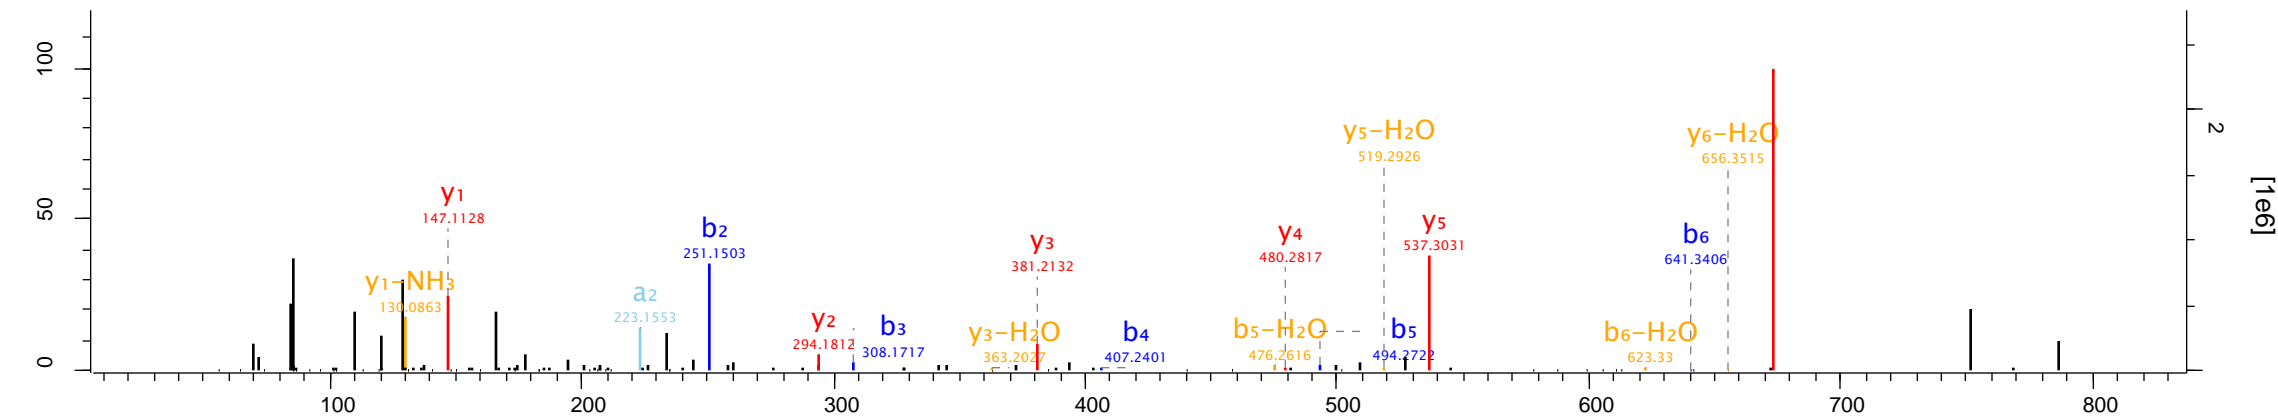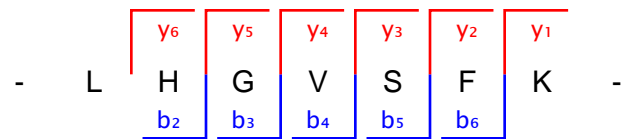

Raw file Scan Method Score m/z Gene names

20140608\_QEp4\_FaHo\_QC\_YNG2\_03 6750 FTMS; HCD 87.58 429.22 SHM2;SHM1

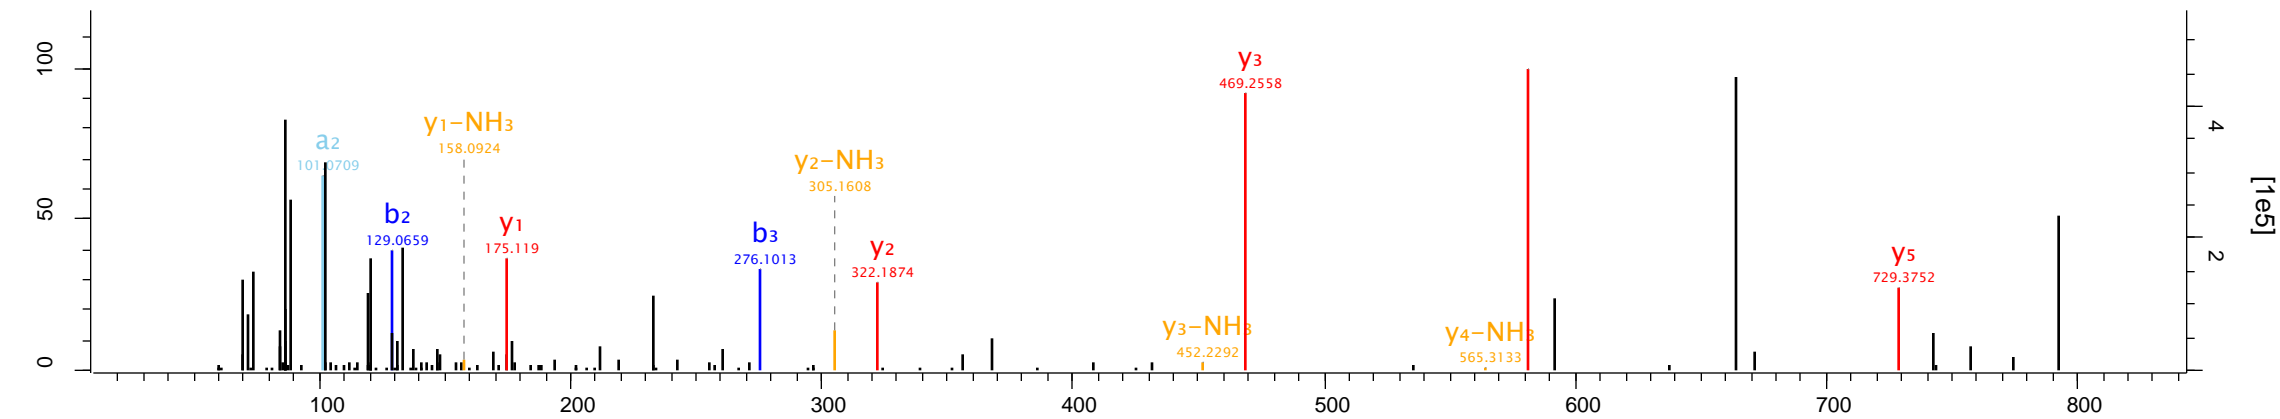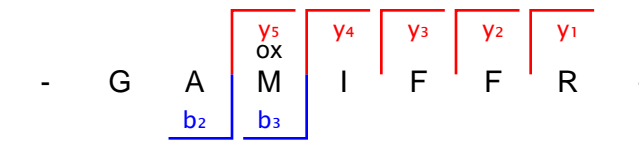

Raw file Scan Method Score m/z Gene names

20140608\_QEp4\_FaHo\_QC\_YNG2\_03 7134 FTMS; HCD 0.88 705.12 ECM38

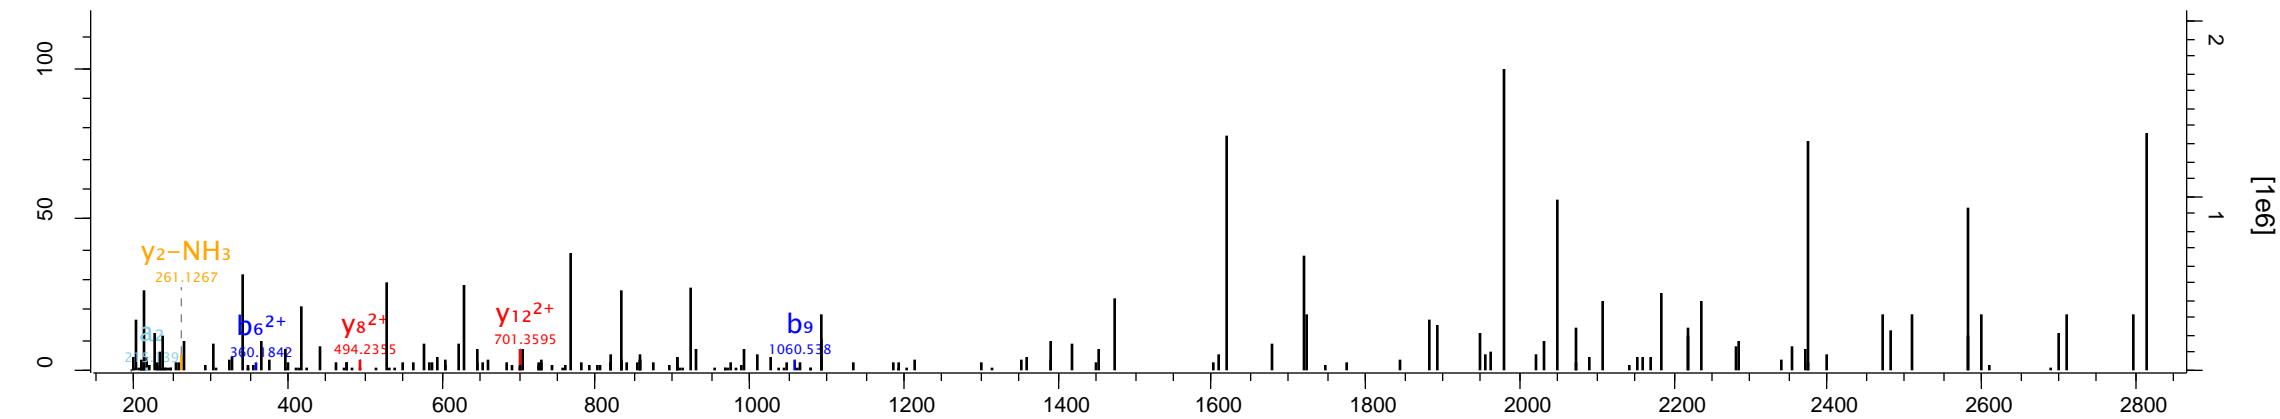

- I E L E S F P M I G K A V L S T L K E M G Y T M K -

Fragmentation labels:  $a_2$  (under E),  $b_6^{2+}$  (under F),  $b_9$  (under I),  $y_{12}^{2+}$  (above L),  $y_8^{2+}$  (above K).

Raw file Scan Method Score m/z Gene names

20140608\_QEp4\_FaHo\_QC\_YNG2\_03 7970 FTMS; HCD 101.66 732.62 MRPS12

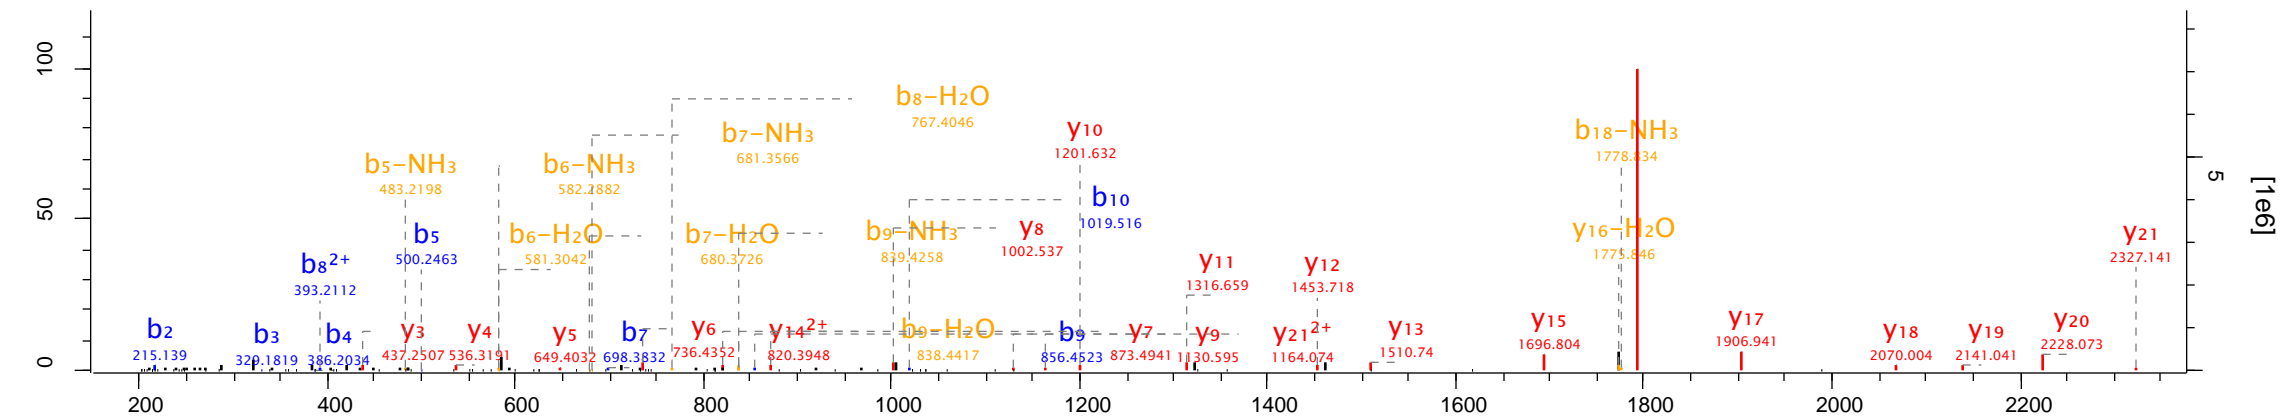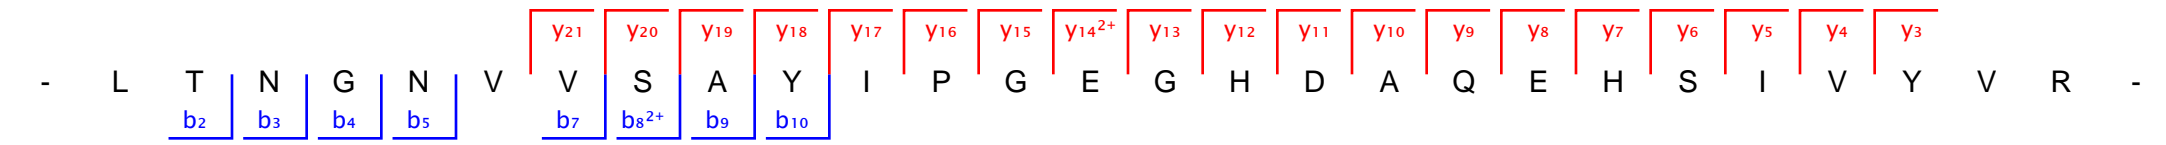

| Raw file                      | Scan | Method    | Score  | m/z    | Gene names    |
|-------------------------------|------|-----------|--------|--------|---------------|
| 20140608_QEp4_FaHo_QC_YNG2_03 | 8418 | FTMS; HCD | 153.95 | 670.91 | RPL14B;RPL14A |

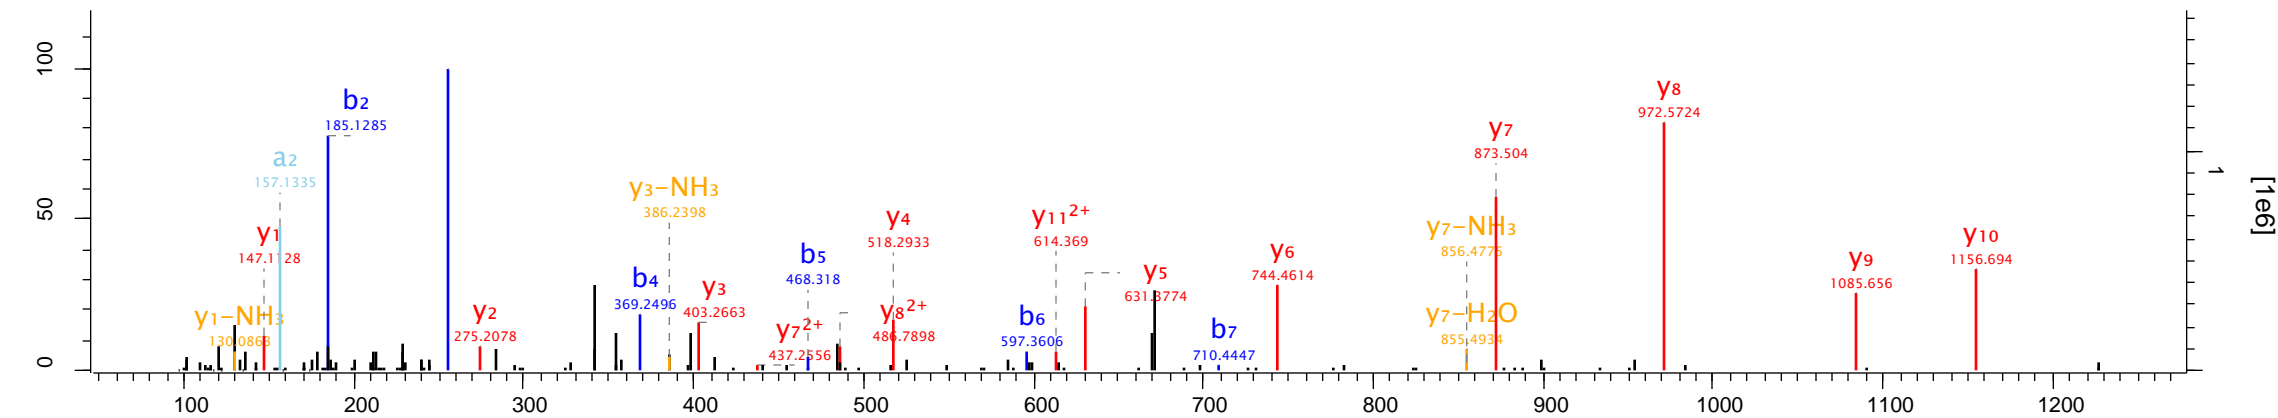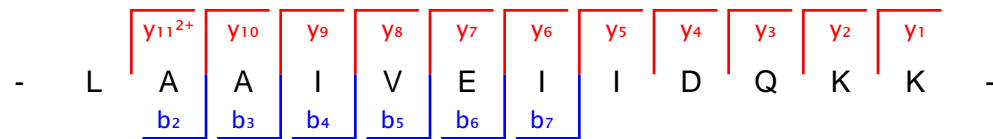

| Raw file                      | Scan | Method    | Score  | m/z    | Gene names  |
|-------------------------------|------|-----------|--------|--------|-------------|
| 20140608_QEp4_FaHo_QC_YNG2_03 | 8835 | FTMS; HCD | 113.24 | 702.35 | RPS0B;RPS0A |

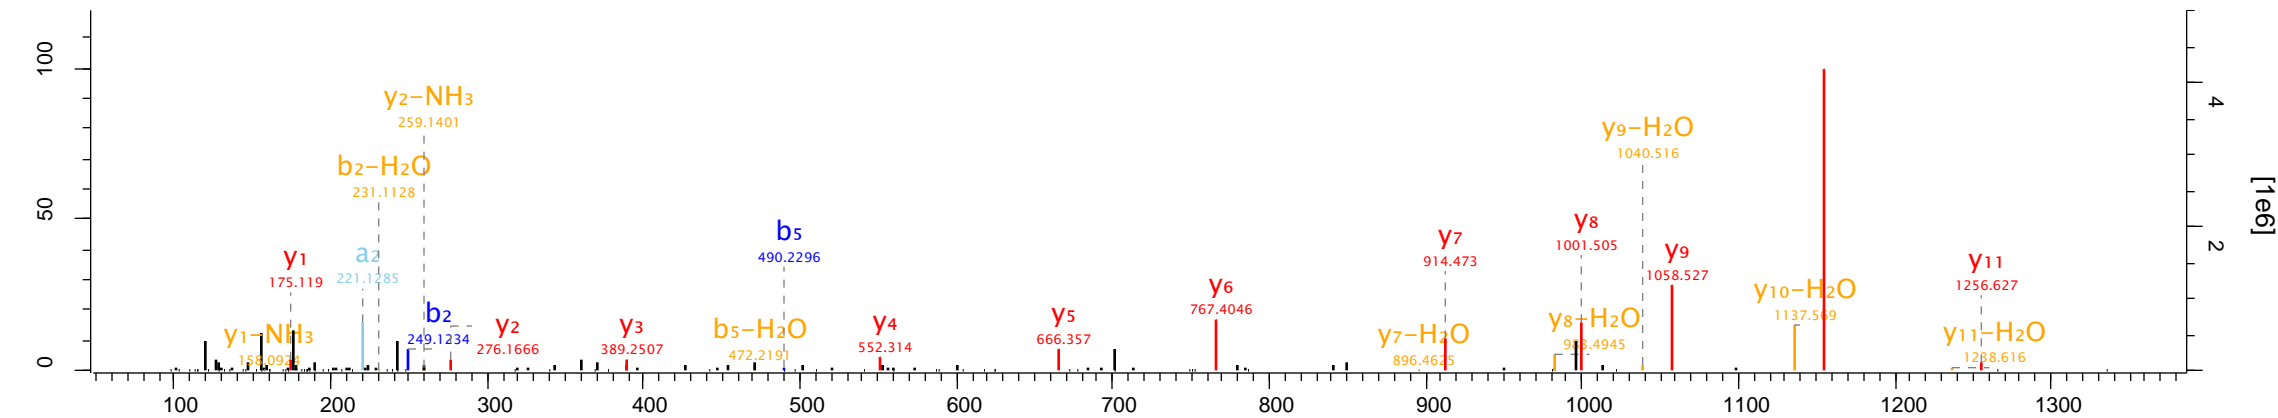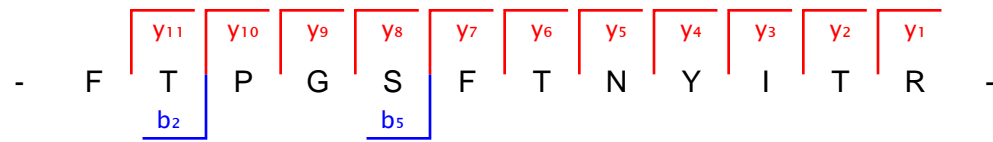

Raw file Scan Method Score m/z Gene names

20140608\_QEp4\_FaHo\_QC\_YNG2\_03 9509 FTMS; HCD 88.08 785.91 XRN1

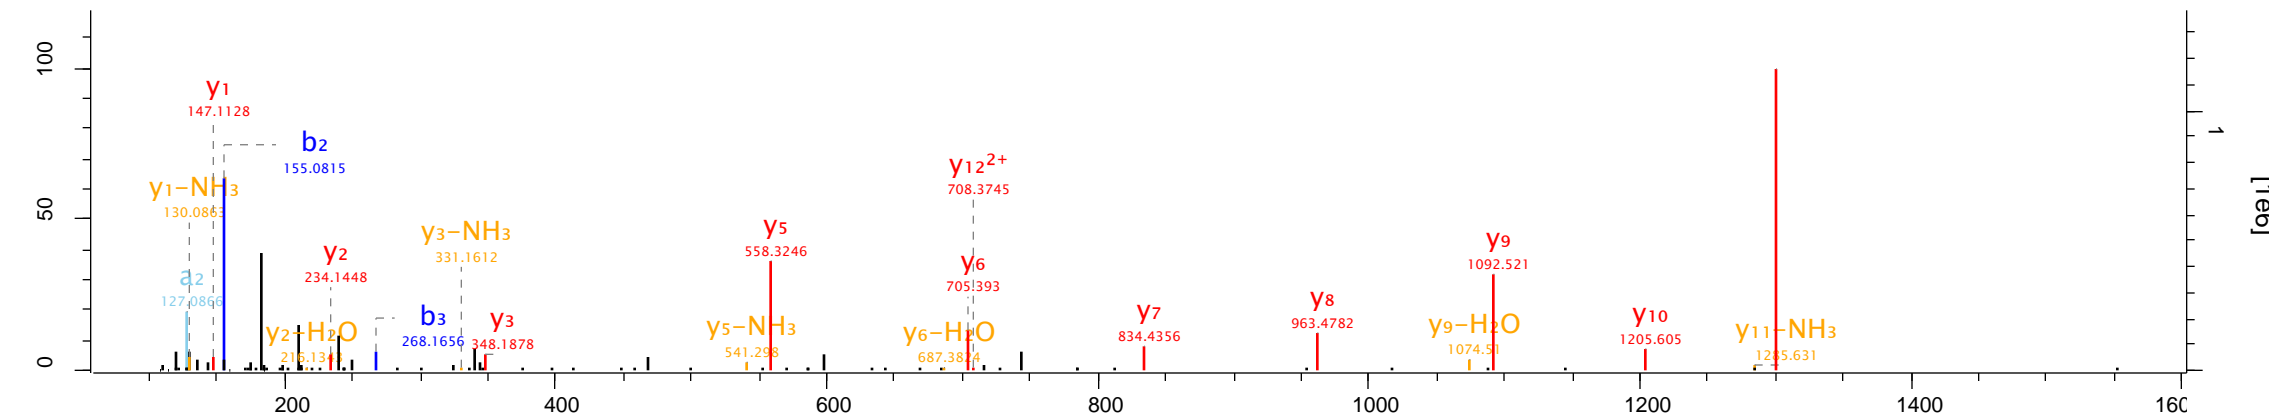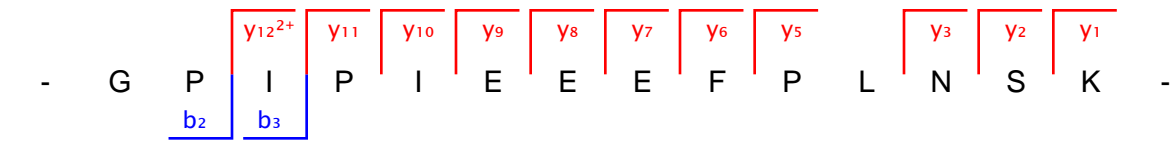

| Raw file                      | Scan  | Method    | Score  | m/z    | Gene names  |
|-------------------------------|-------|-----------|--------|--------|-------------|
| 20140608_QEp4_FaHo_QC_YNG2_03 | 10572 | FTMS; HCD | 122.79 | 871.48 | RPL4B;RPL4A |

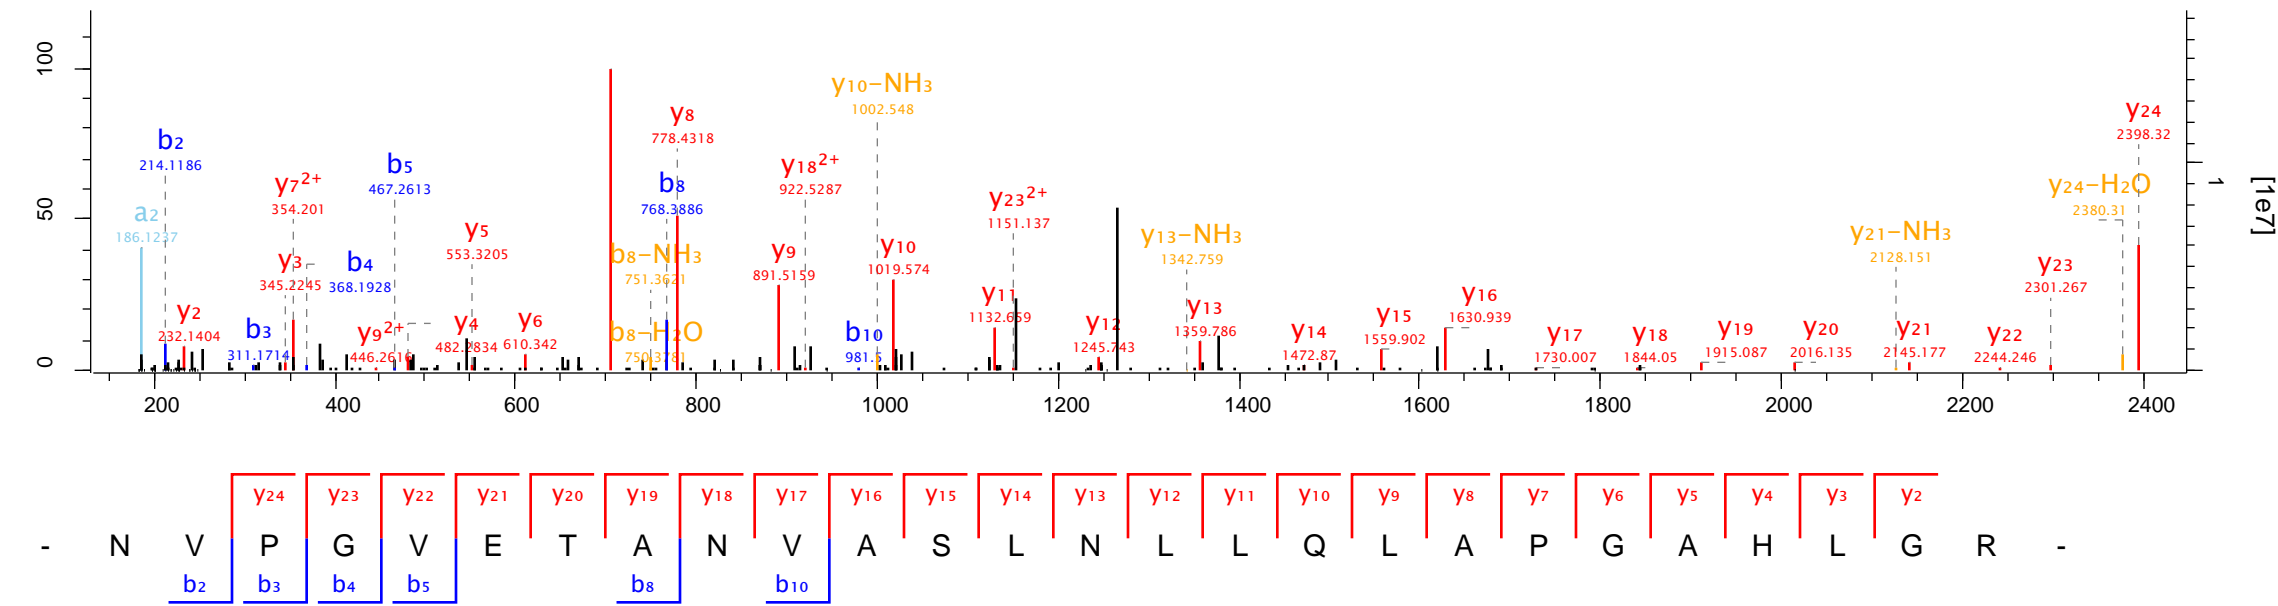

Supplement: supp_O115.049460_mcp.O115.049460-6.pdf [file supp_O115.049460_mcp.O115.049460-6.pdf]
