# Supplementary material for: A Double-Barrel Liquid Chromatography-Tandem Mass Spectrometry (LC-MS/MS) System to Quantify 96 Interactomes per Day
Source: PubMed Central journal article supplement (PMC4587330; doi:10.1074/mcp.o115.049460), 2015-04-17
Supplement: supp_O115.049460_mcp.O115.049460-2.pdf [file supp_O115.049460_mcp.O115.049460-2.pdf]

## **Ultra-high Throughput LC-MS/MS Protein Interaction Analysis – Processing 96 Pull-downs in a Single Day**

**Experiment: 14 minutes**

**F. Hosp\*, R.A. Scheltema\*, H.C. Eberl\*, N.A. Kulak\*, E.C. Keilhauer, K. Mayr and M. Mann**

# Missing values

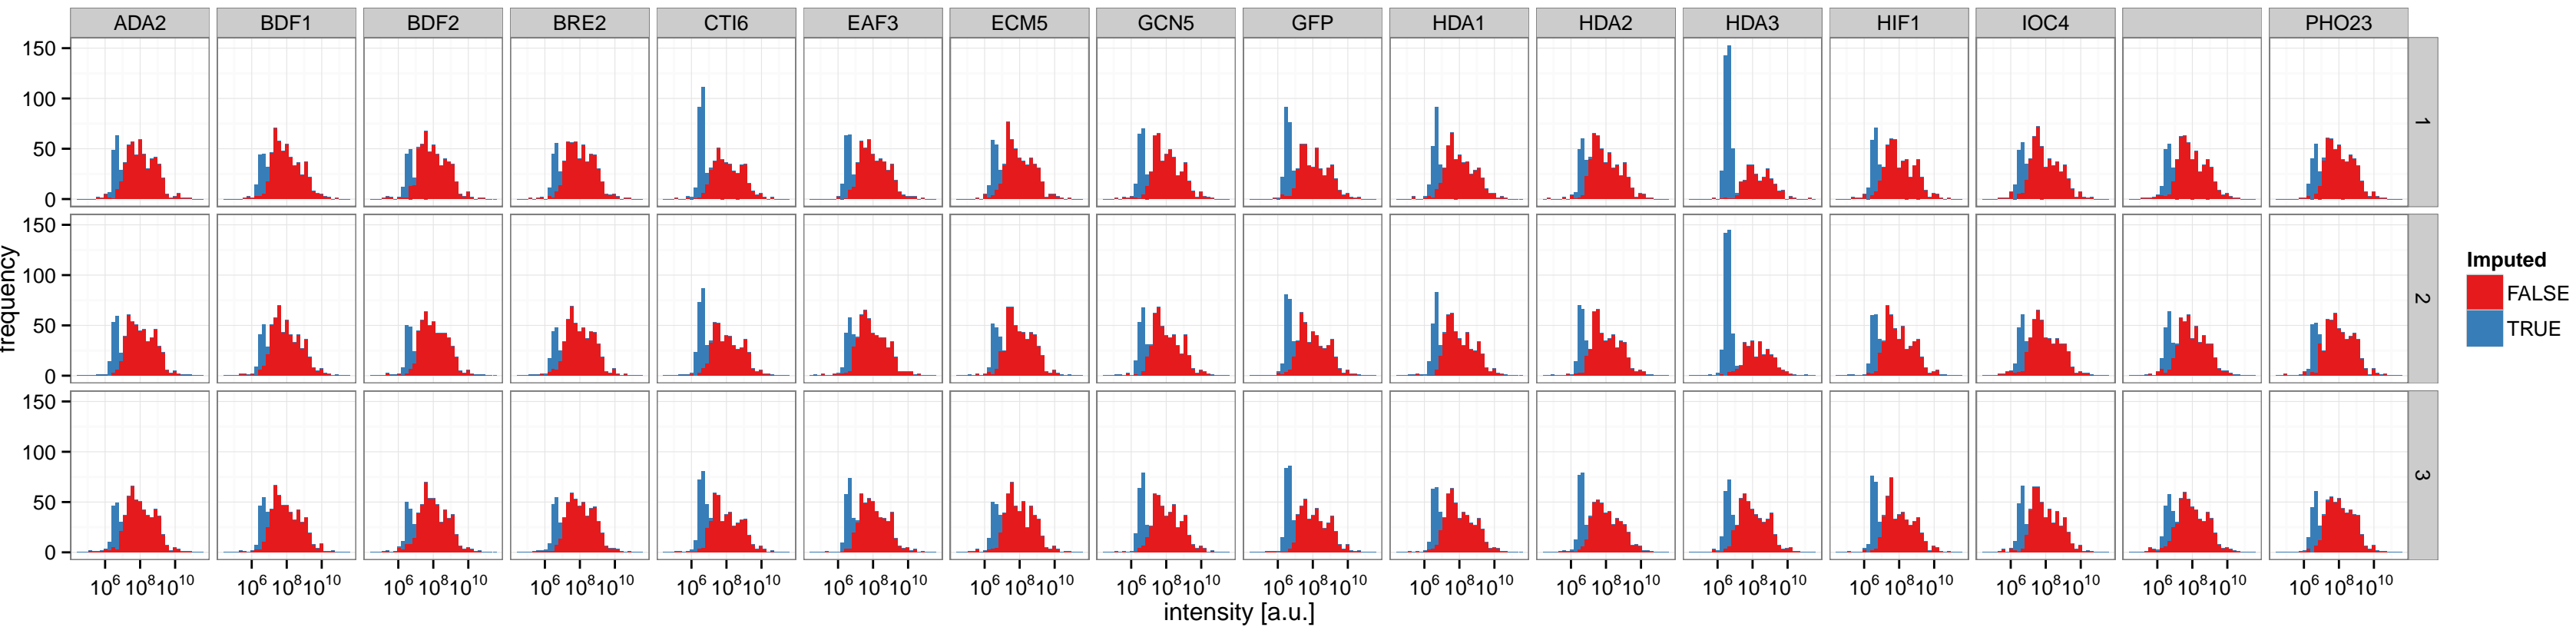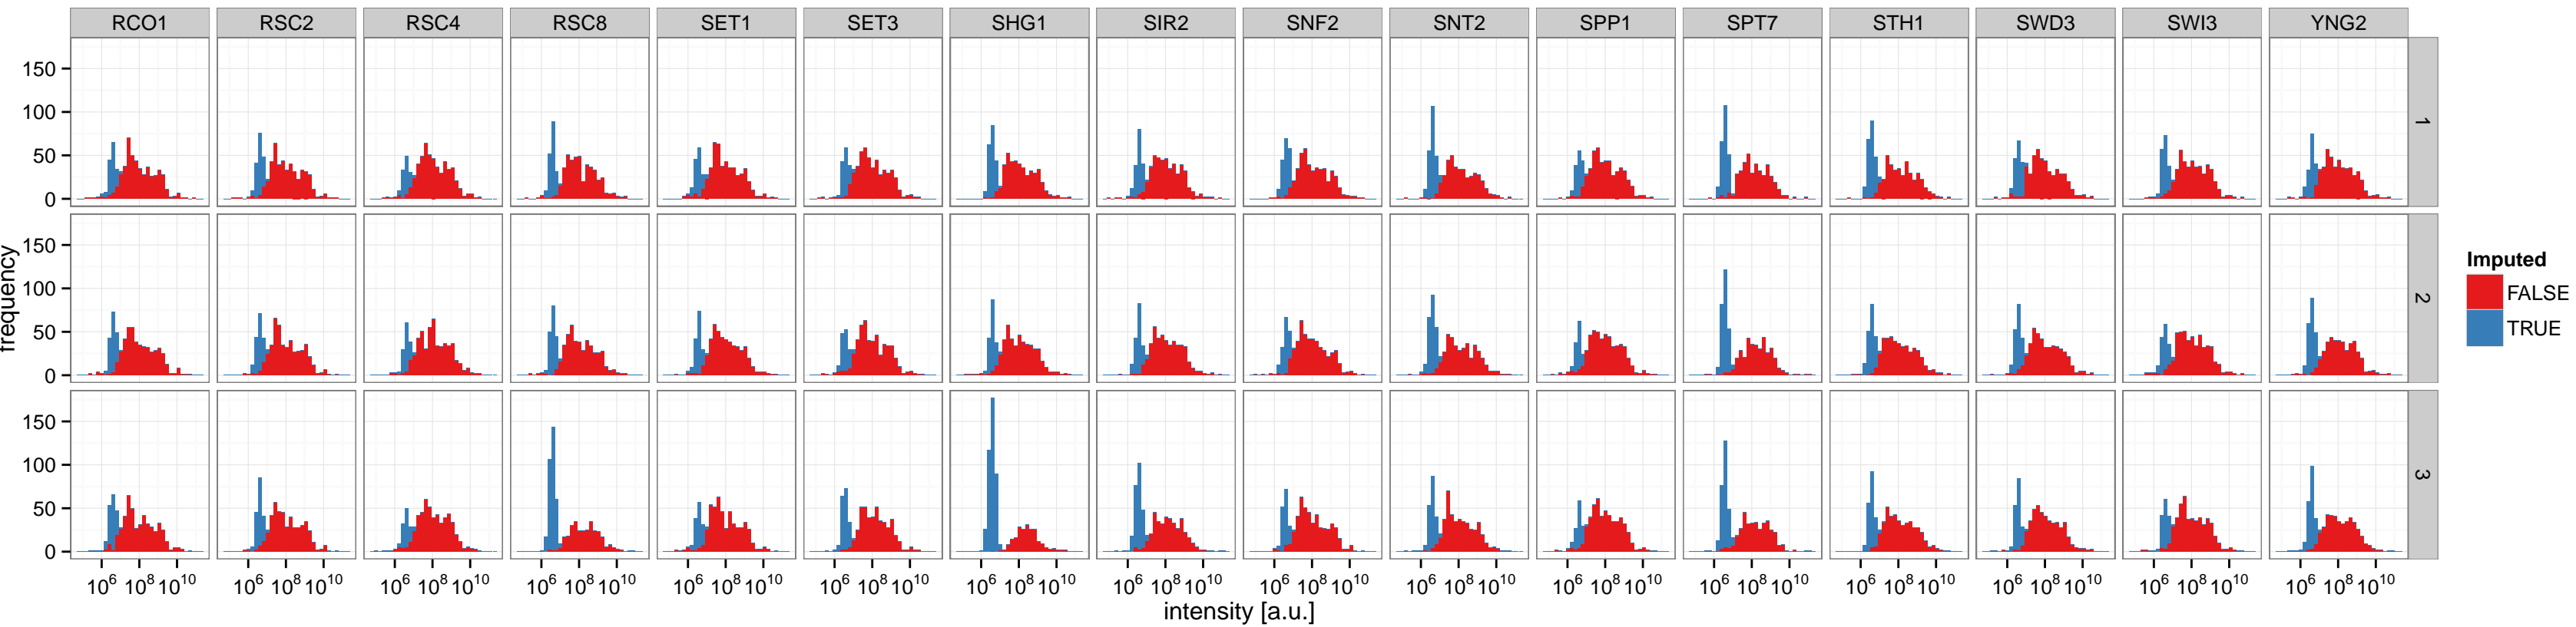



|                   |            |
|-------------------|------------|
| <b>bait</b>       | BDF1       |
| <b>experiment</b> | 14 minutes |

|                    |      |
|--------------------|------|
| <b>interactors</b> | 38   |
| <b>recovery</b>    | 31 % |

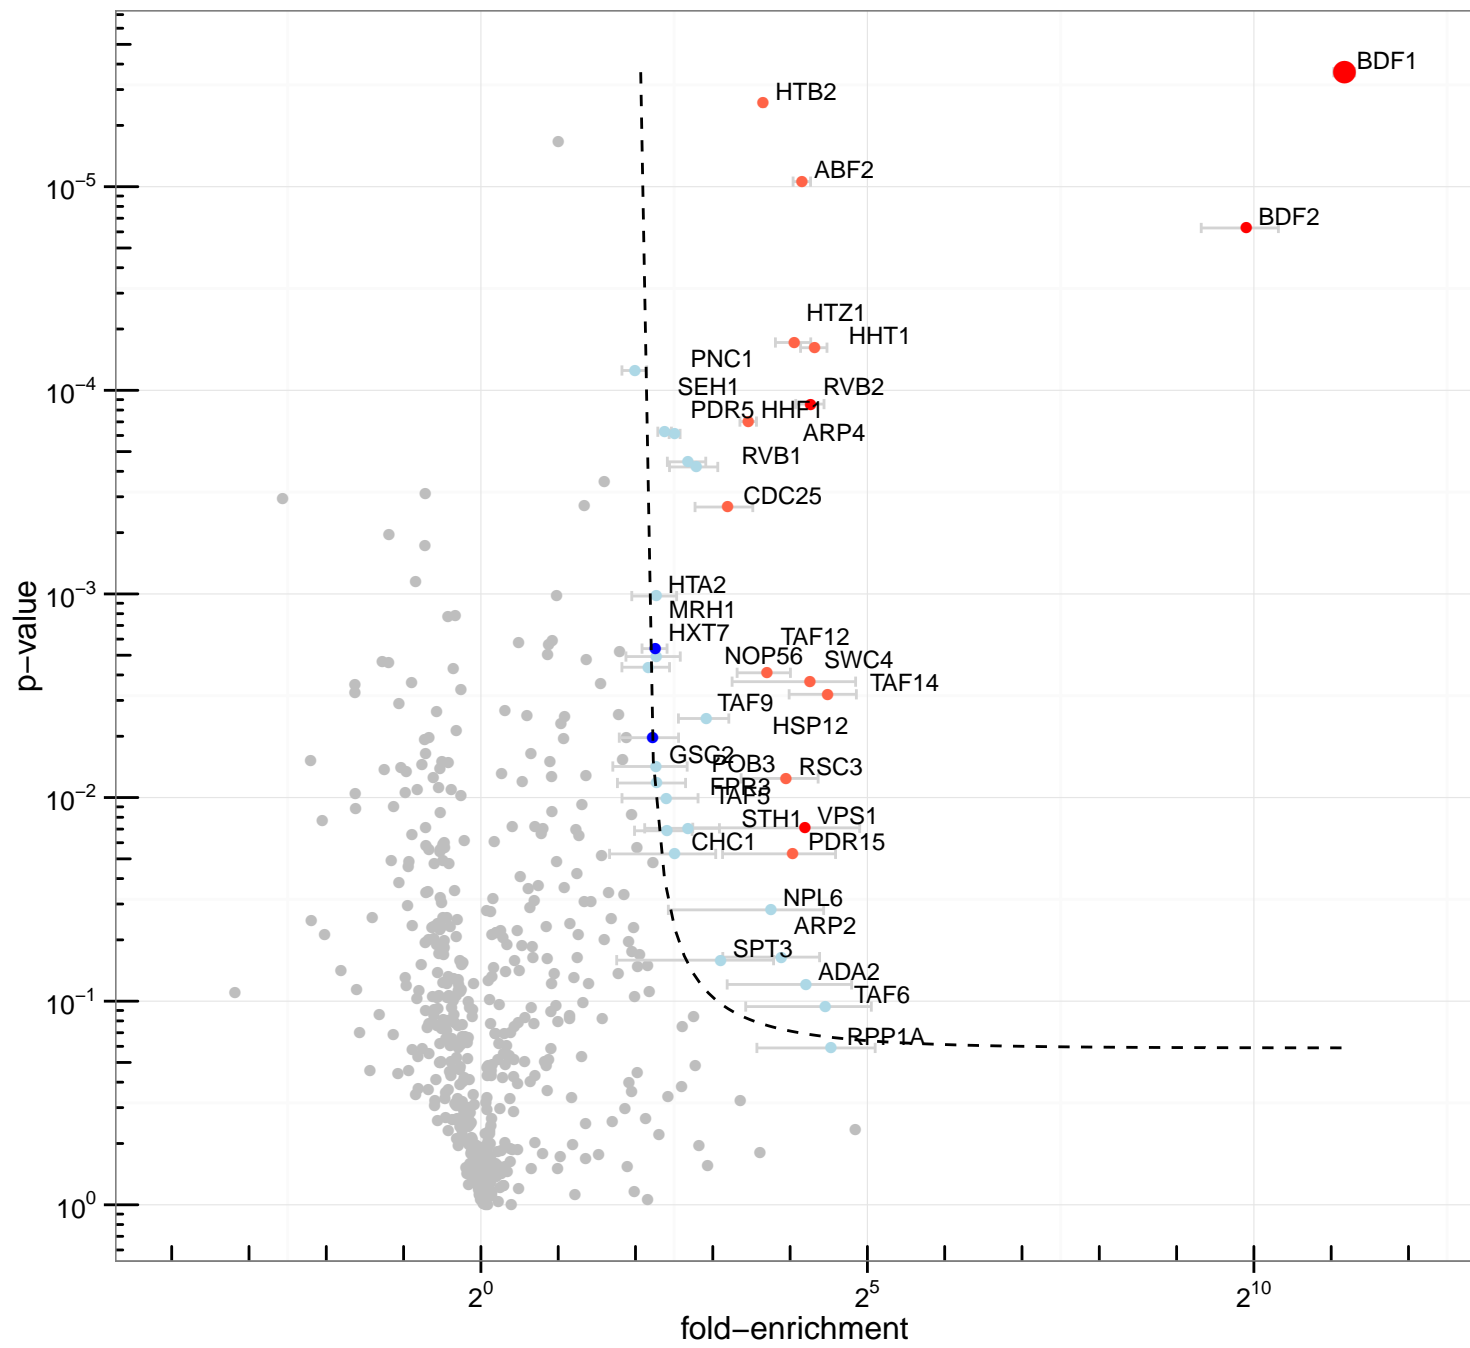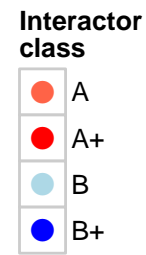

|                         | ABF2 | BDF1 | BDF2 | CDC25 | HHP1 | HHT1 | HSP12 | HTB2 | HTZ1 | MRH1 | PDR15 | RSC3 | RVB2 | SWC4 | TAF12 | TAF14 | VPS1 |
|-------------------------|------|------|------|-------|------|------|-------|------|------|------|-------|------|------|------|-------|-------|------|
| <i>significance</i>     | 5.9  | 12.0 | 10.0 | 4.1   | 4.6  | 5.4  | 2.6   | 6.0  | 5.2  | 3.0  | 3.5   | 3.6  | 5.1  | 4.2  | 3.8   | 4.3   | 3.7  |
| <i>interactor class</i> | A    | A+   | A+   | A     | A    | A    | B+    | A    | A    | B+   | A     | A    | A+   | A    | A     | A     | A+   |

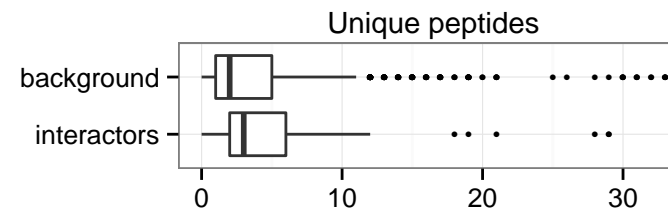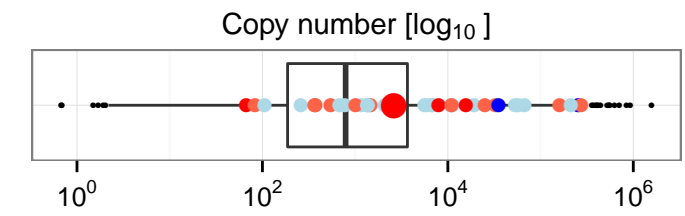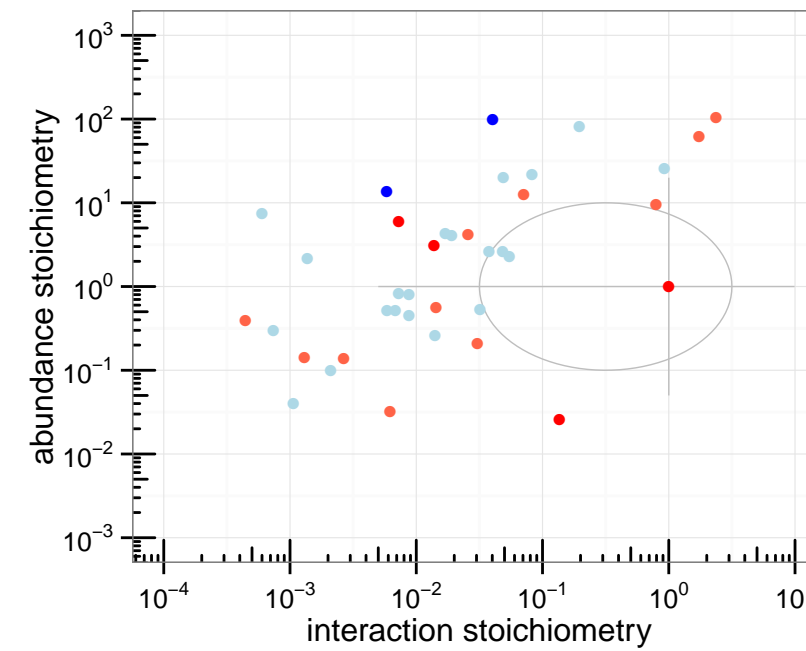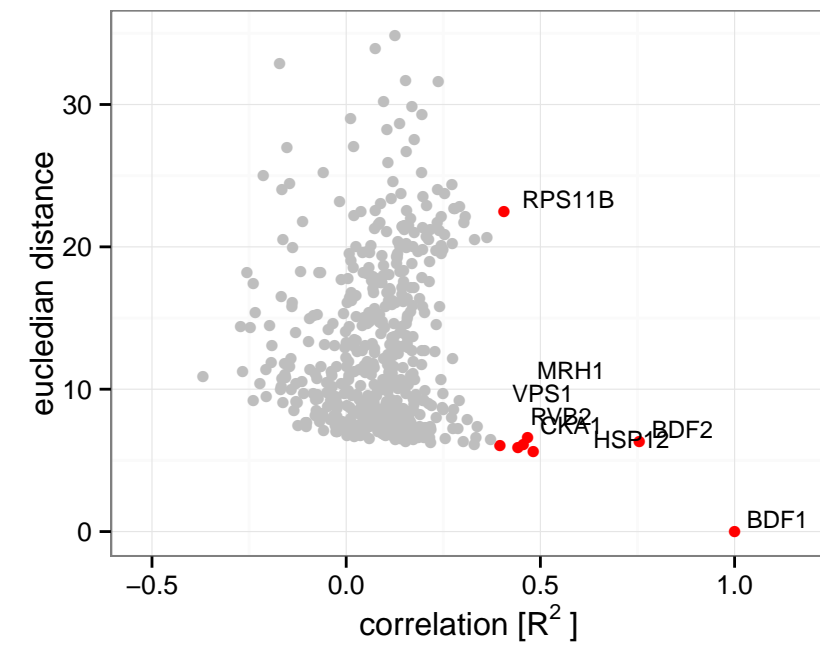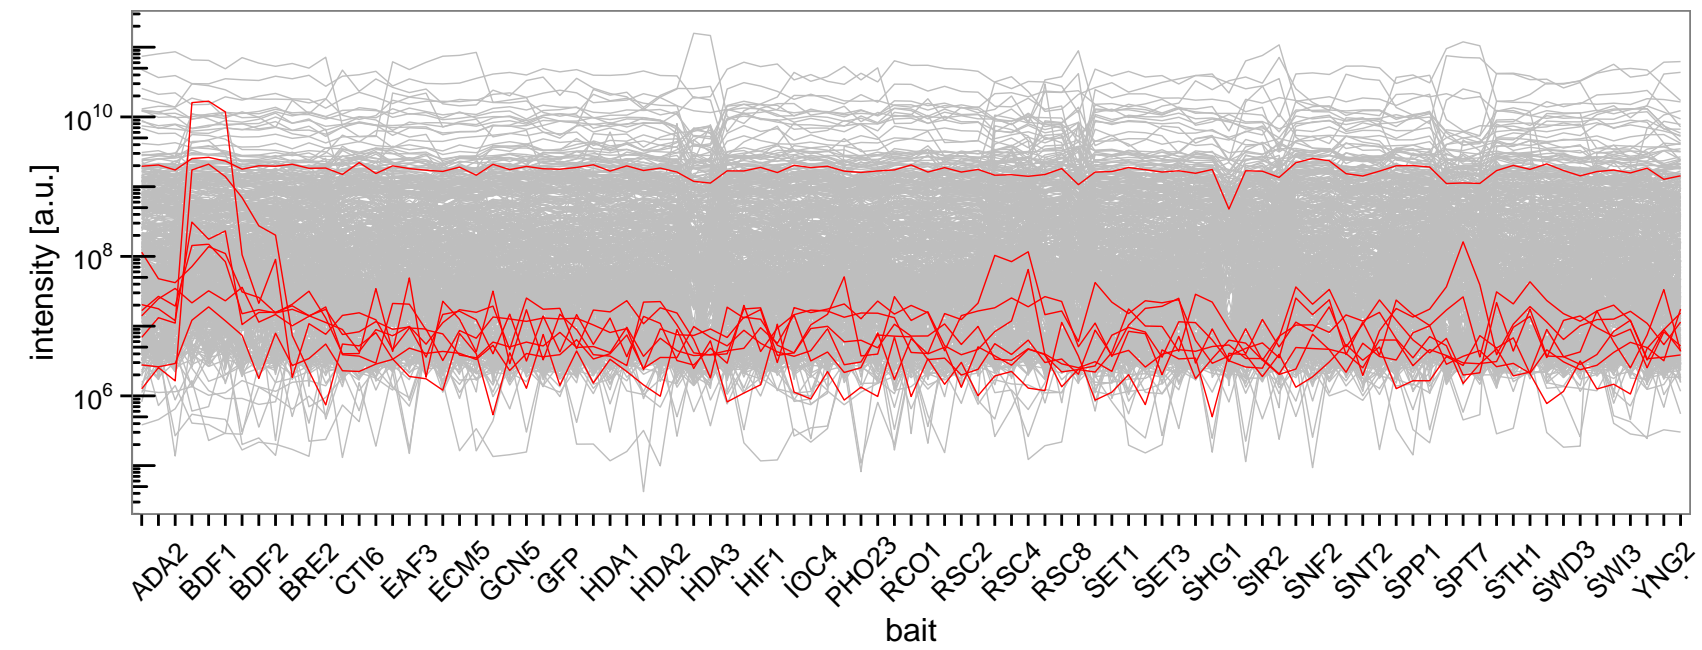

|                   |            |
|-------------------|------------|
| <b>bait</b>       | BDF2       |
| <b>experiment</b> | 14 minutes |

|                    |     |
|--------------------|-----|
| <b>interactors</b> | 1   |
| <b>recovery</b>    | 0 % |

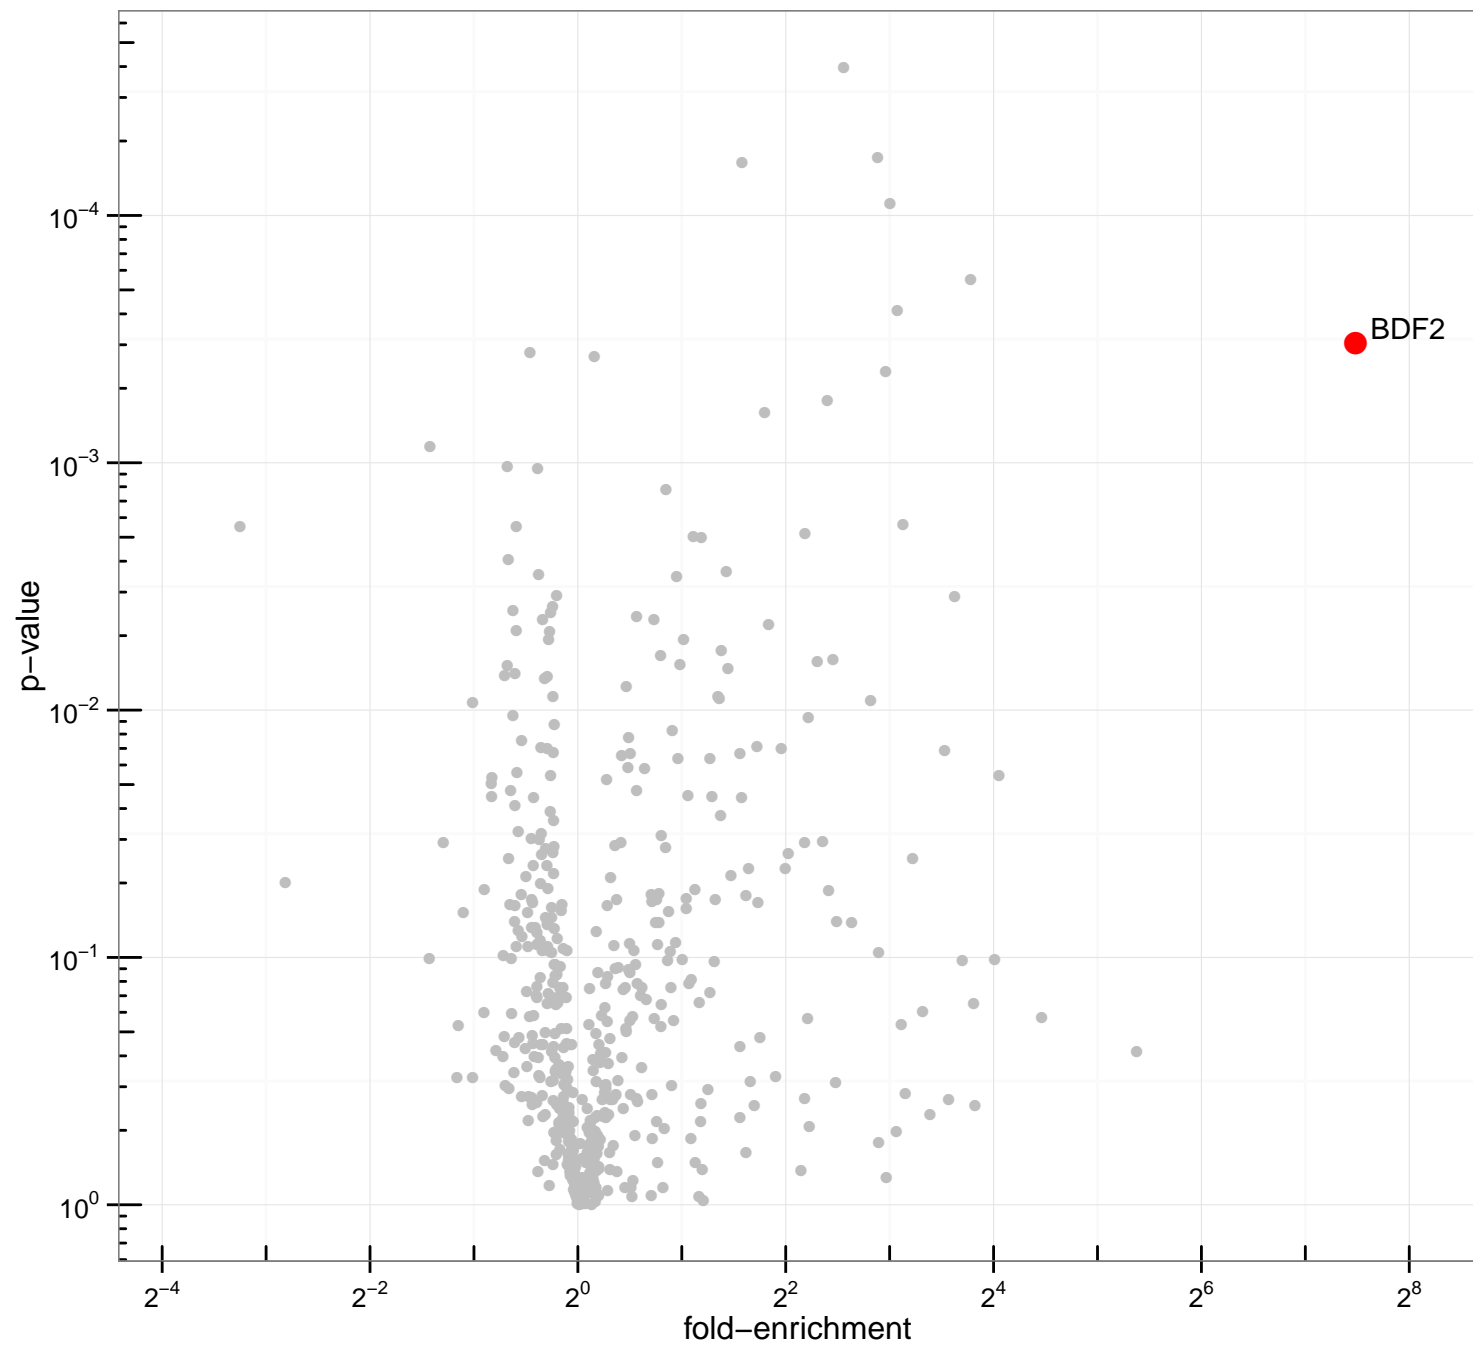

**Interactor class**  
● A+

|                         | <b>BDF2</b> |
|-------------------------|-------------|
| <i>significance</i>     | 7.4         |
| <i>interactor class</i> | A+          |

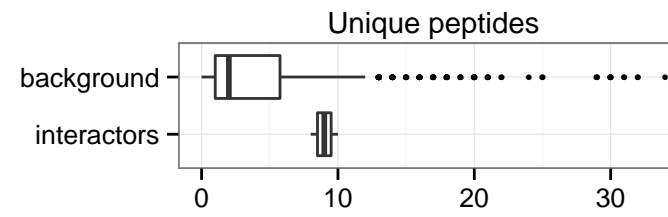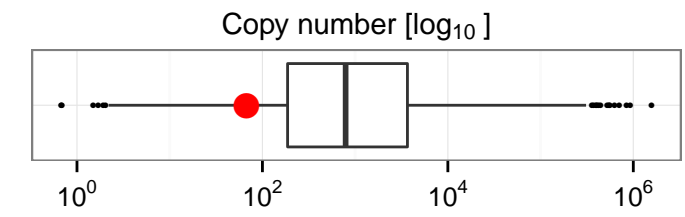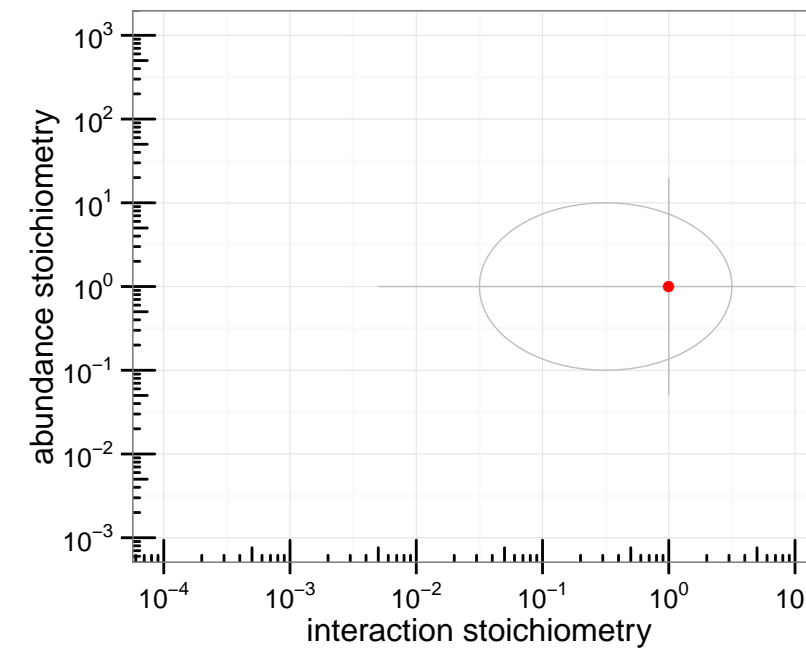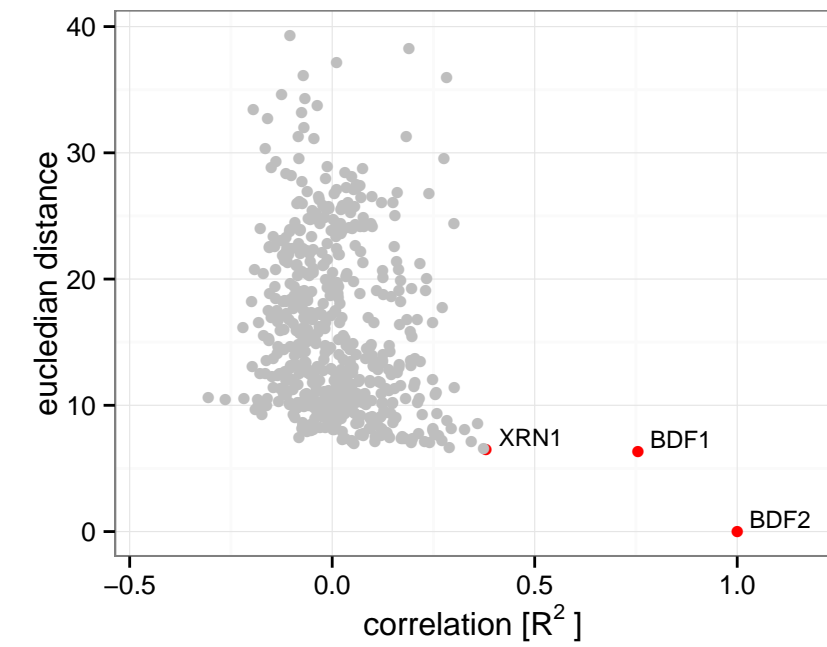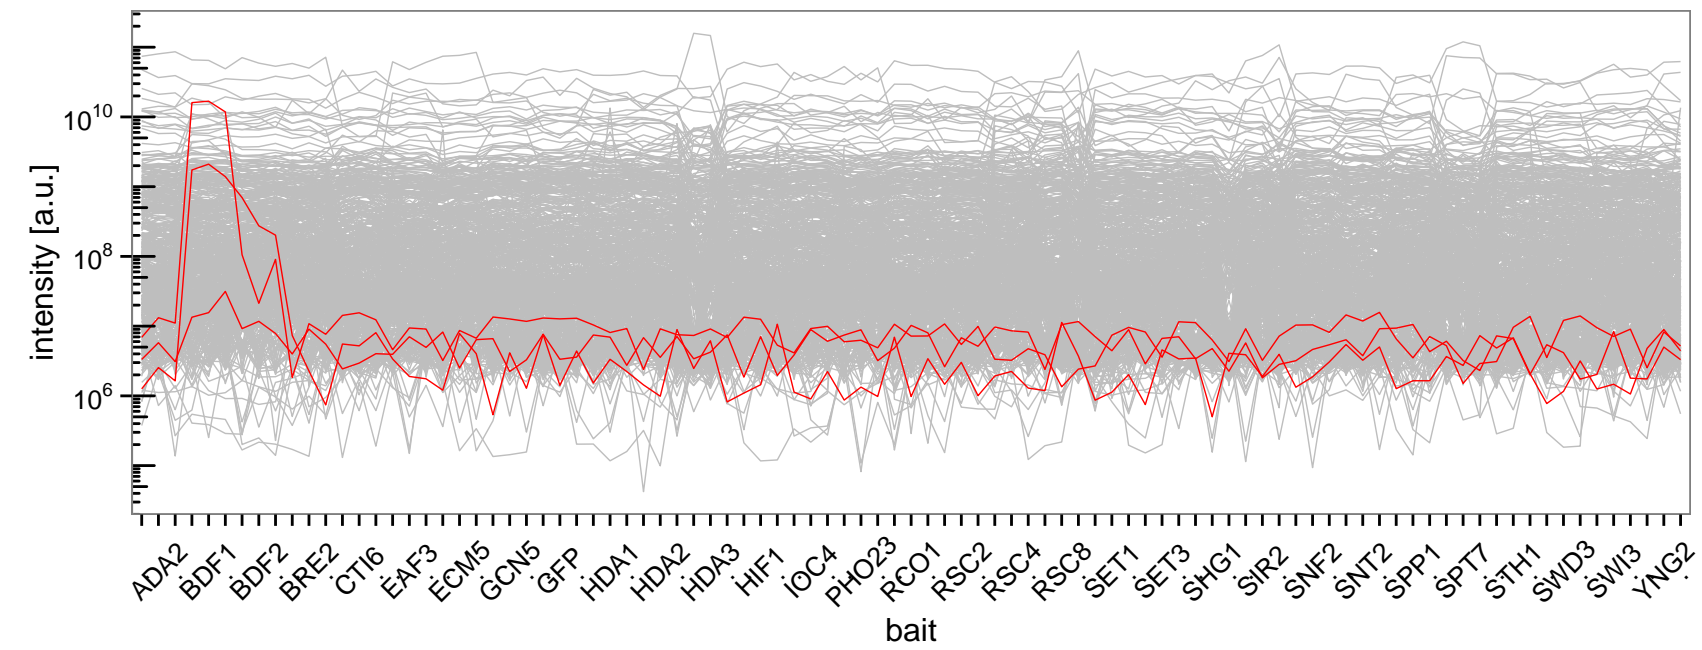

|                   |            |
|-------------------|------------|
| <b>bait</b>       | BRE2       |
| <b>experiment</b> | 14 minutes |

|                    |       |
|--------------------|-------|
| <b>interactors</b> | 43    |
| <b>recovery</b>    | 100 % |

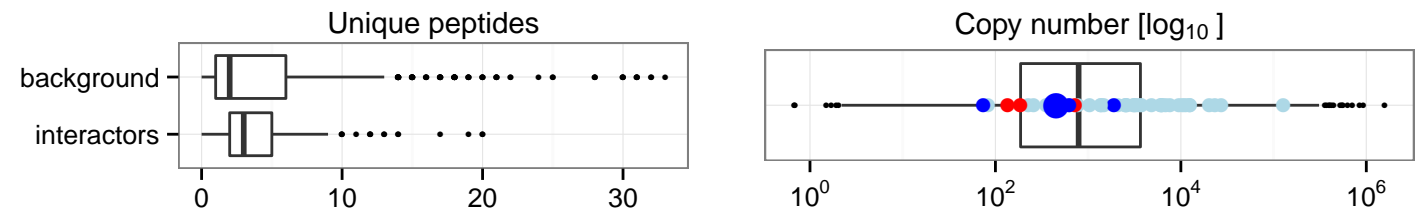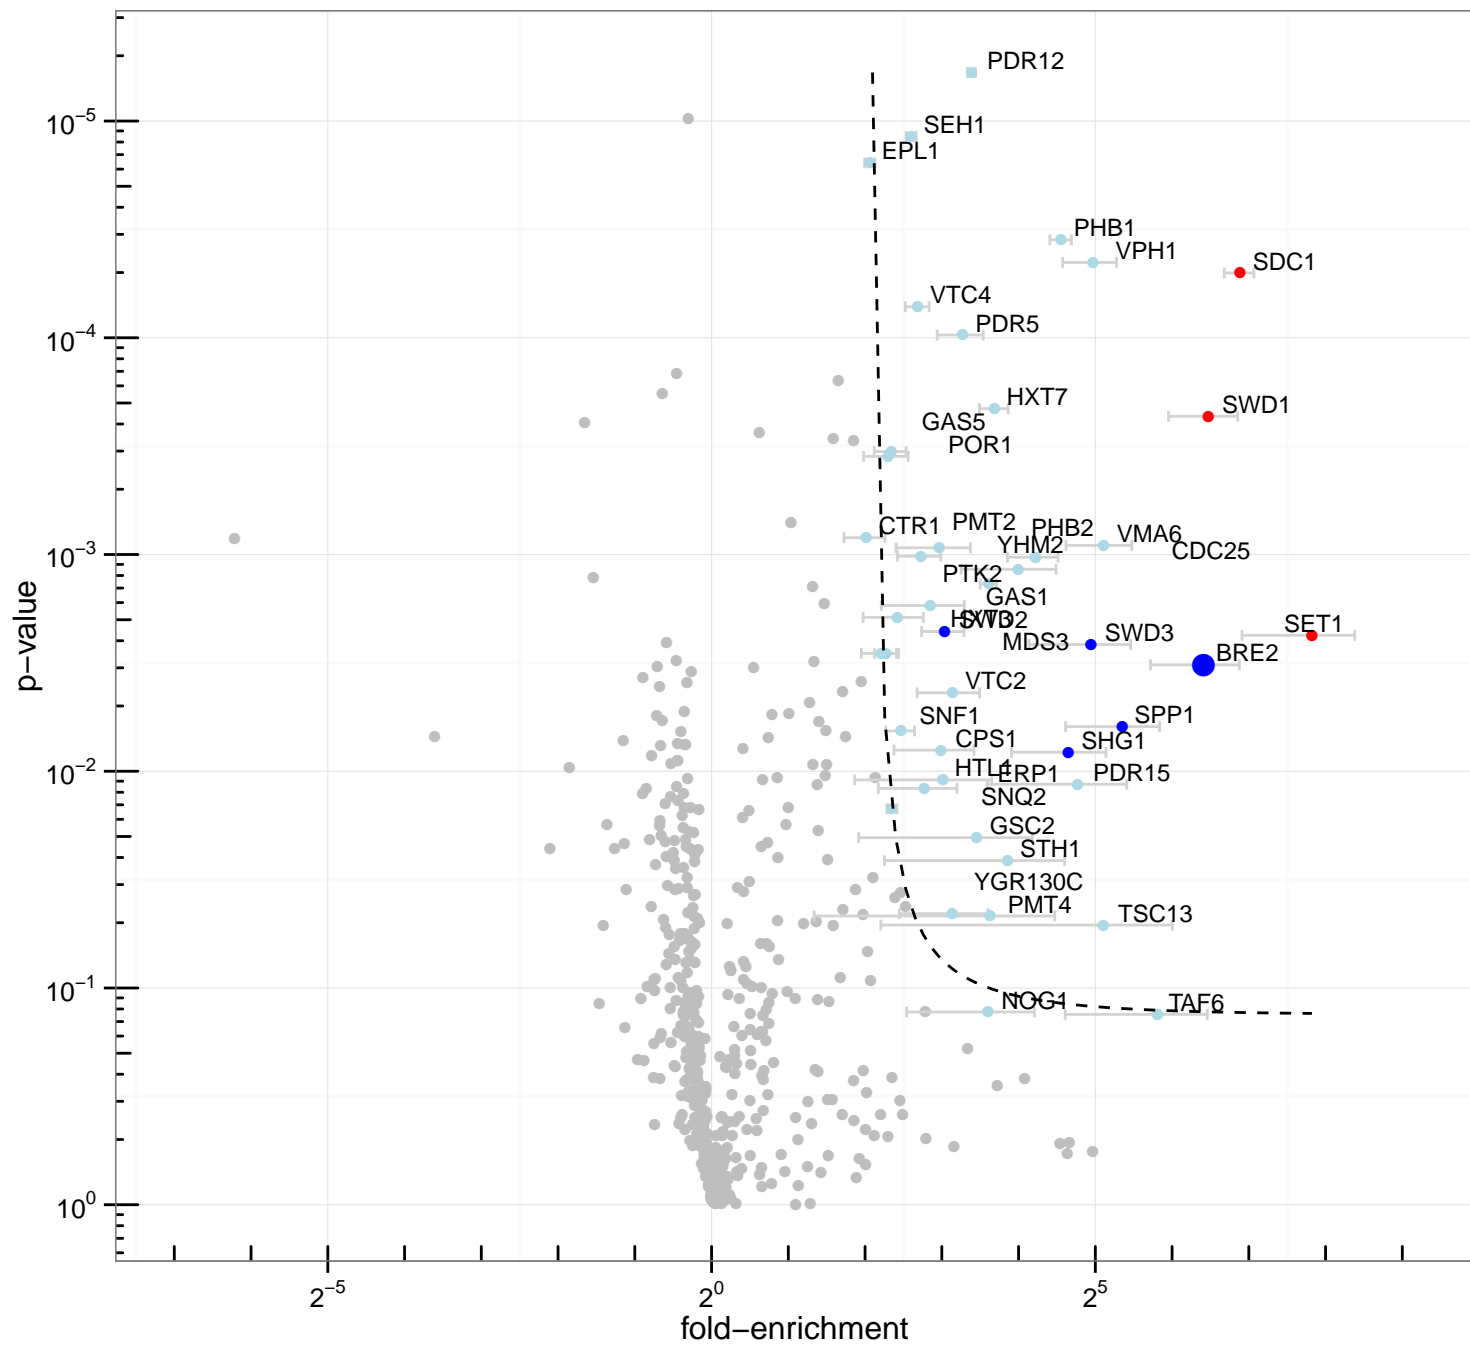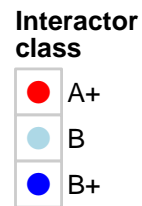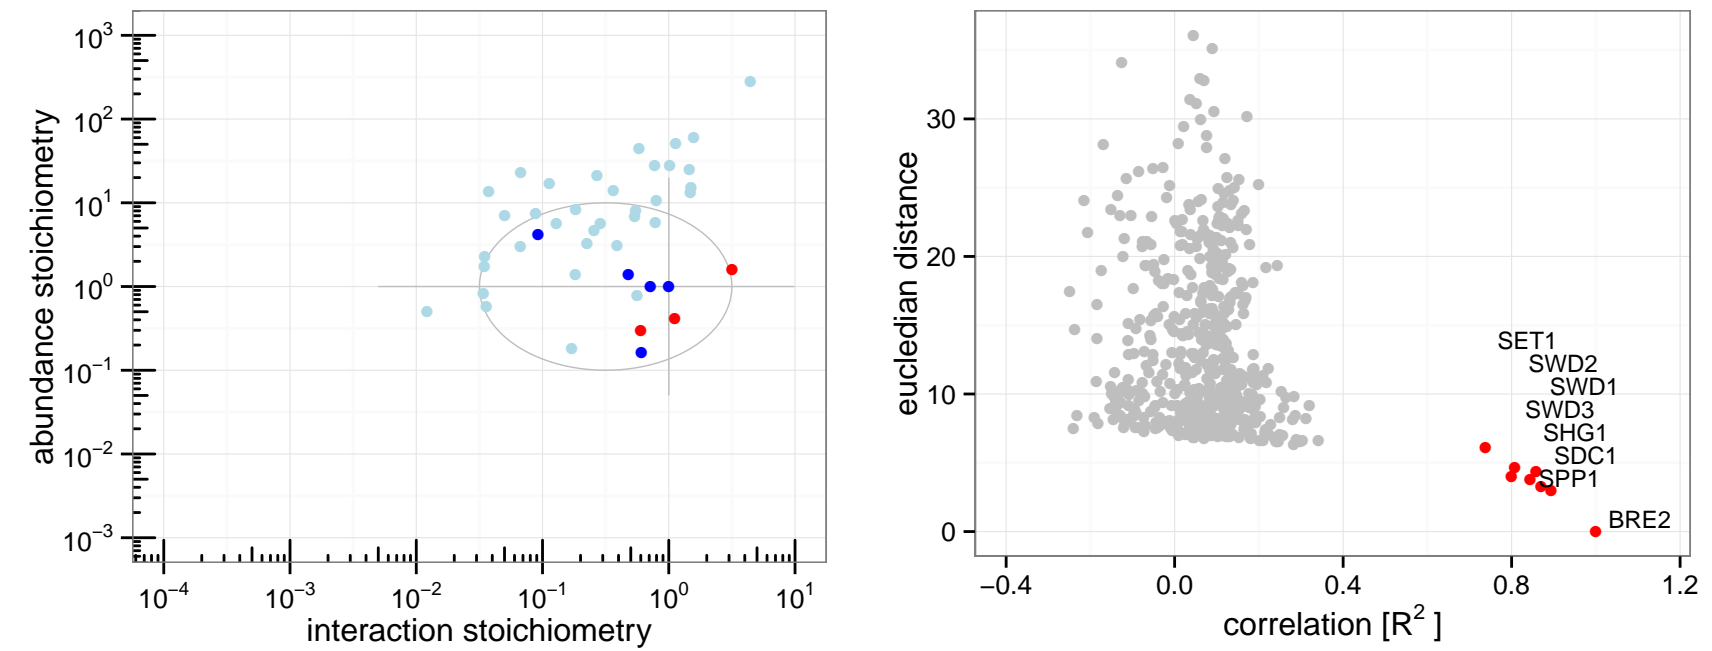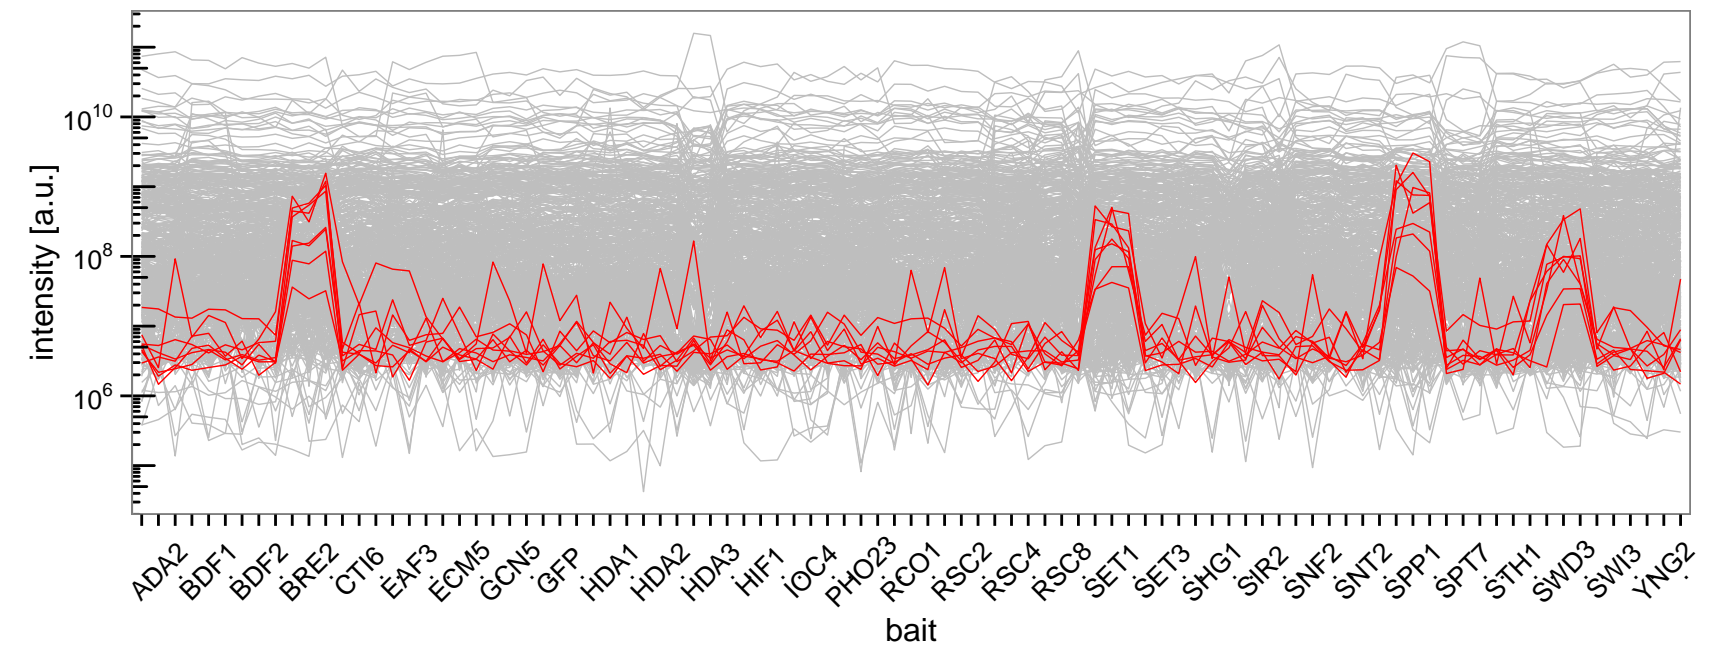

|                         | BRE2 | SDC1 | SET1 | SHG1 | SPP1 | SWD1 | SWD2 | SWD3 |
|-------------------------|------|------|------|------|------|------|------|------|
| <i>significance</i>     | 6.0  | 7.3  | 7.3  | 4.2  | 4.9  | 6.6  | 3.3  | 4.7  |
| <i>interactor class</i> | B+   | A+   | A+   | B+   | B+   | A+   | B+   | B+   |

|                   |            |
|-------------------|------------|
| <b>bait</b>       | CT16       |
| <b>experiment</b> | 14 minutes |

|                    |     |
|--------------------|-----|
| <b>interactors</b> | 2   |
| <b>recovery</b>    | 0 % |

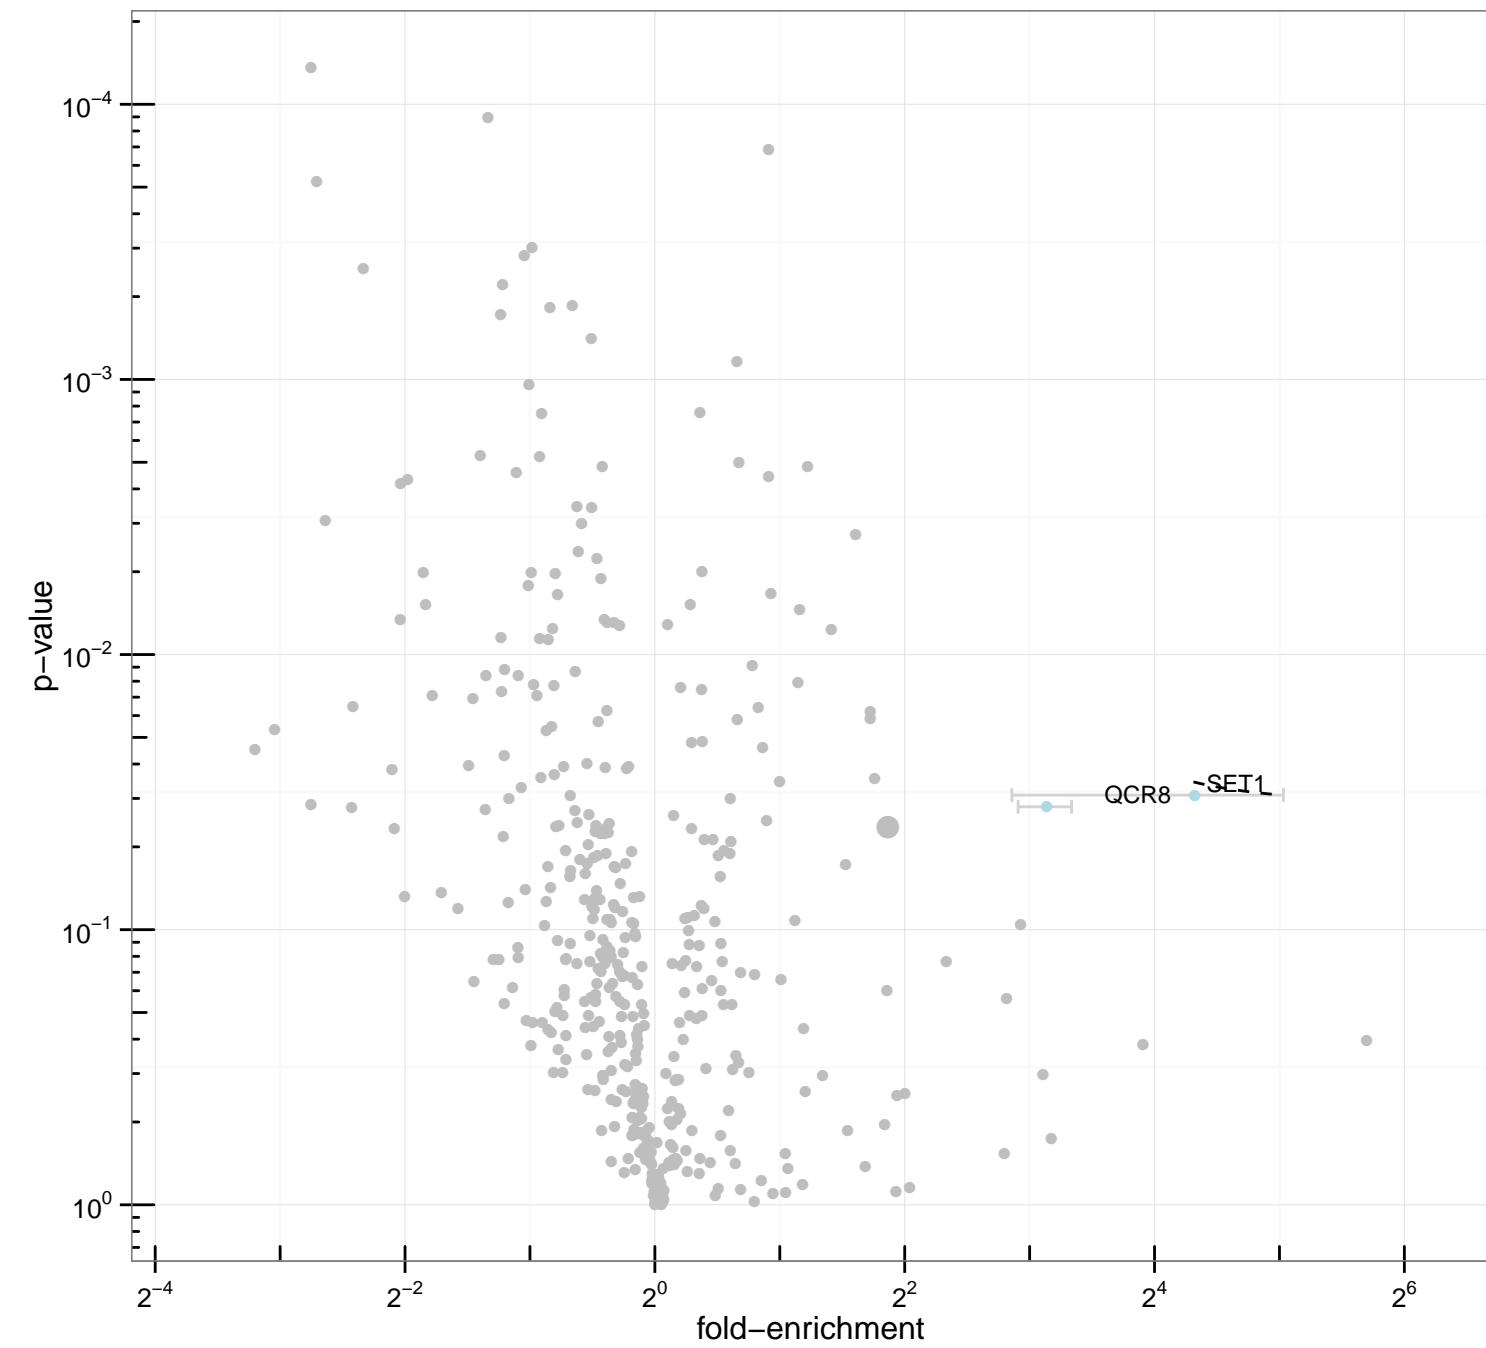

**Interactor class**

- -
- B

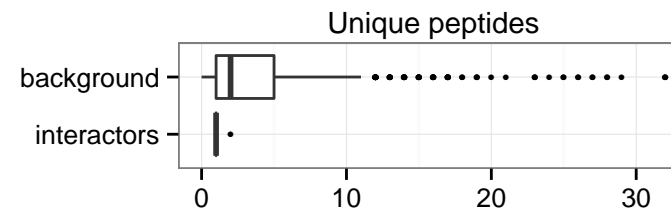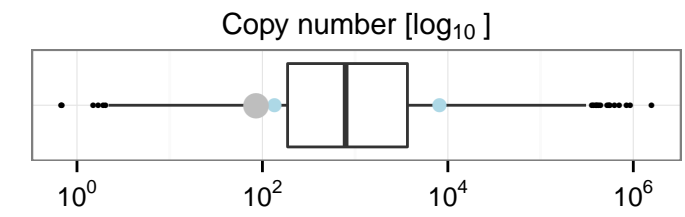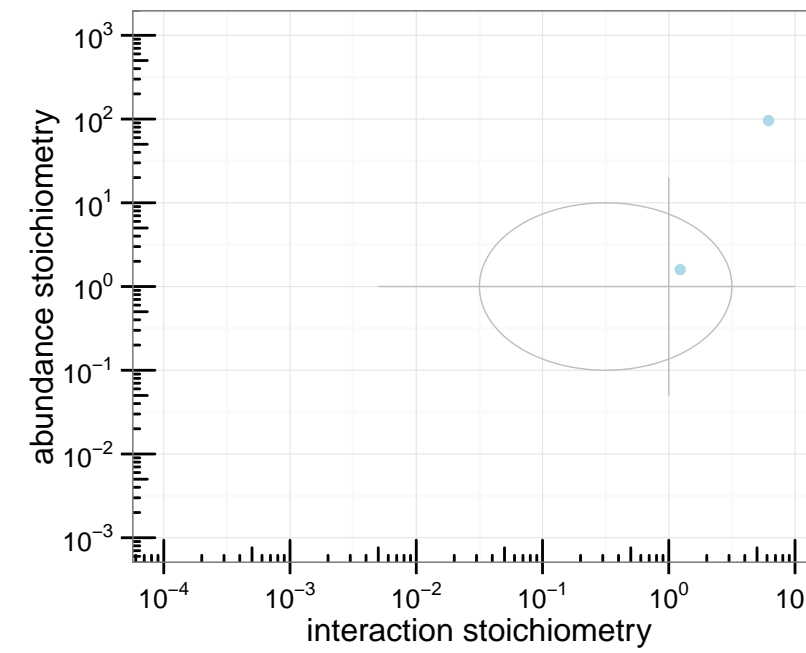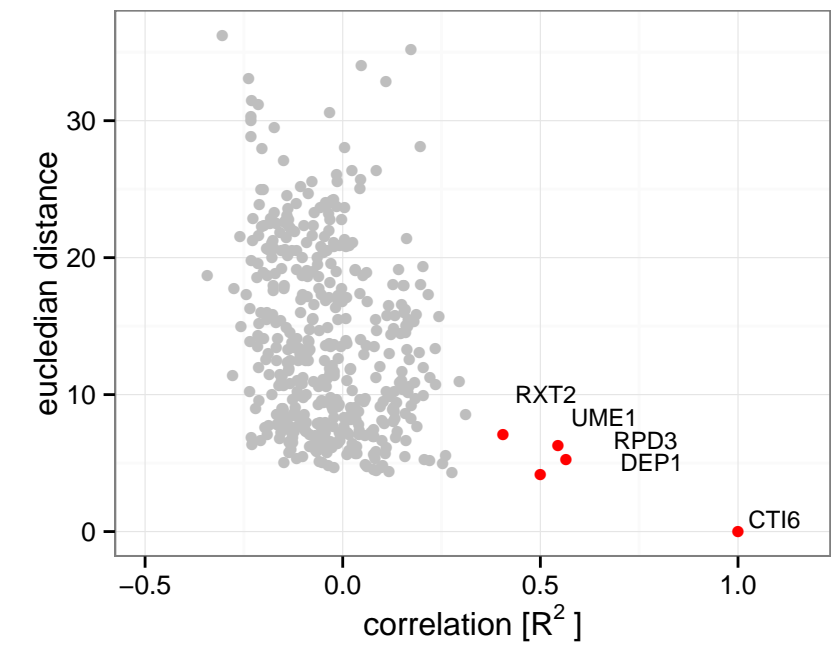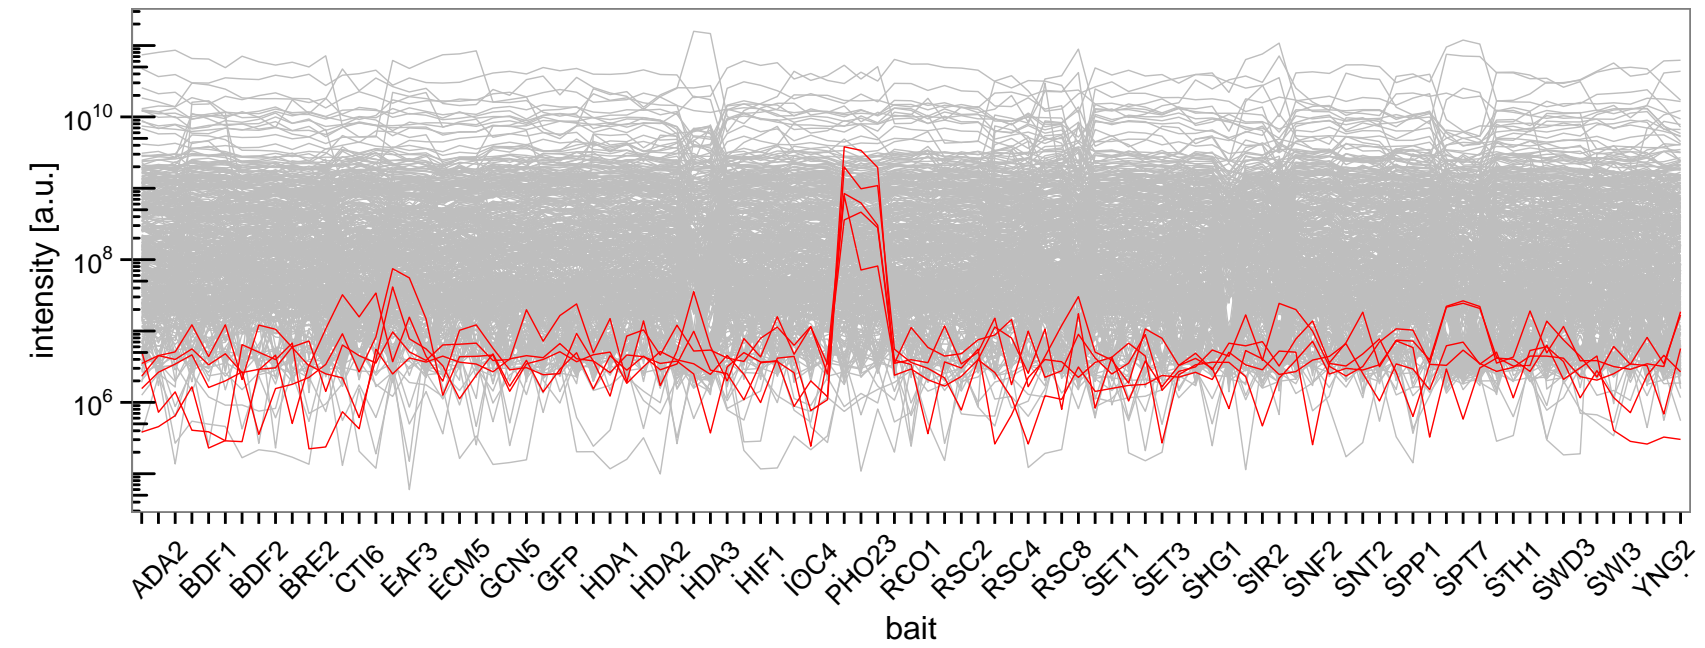

*significance*

*interactor class*

|                   |            |
|-------------------|------------|
| <b>bait</b>       | EAF3       |
| <b>experiment</b> | 14 minutes |

|                    |     |
|--------------------|-----|
| <b>interactors</b> | 3   |
| <b>recovery</b>    | 3 % |

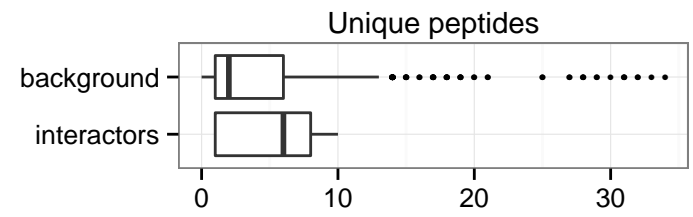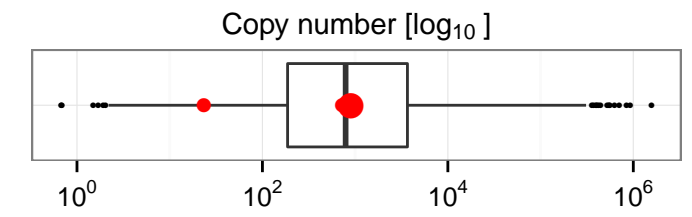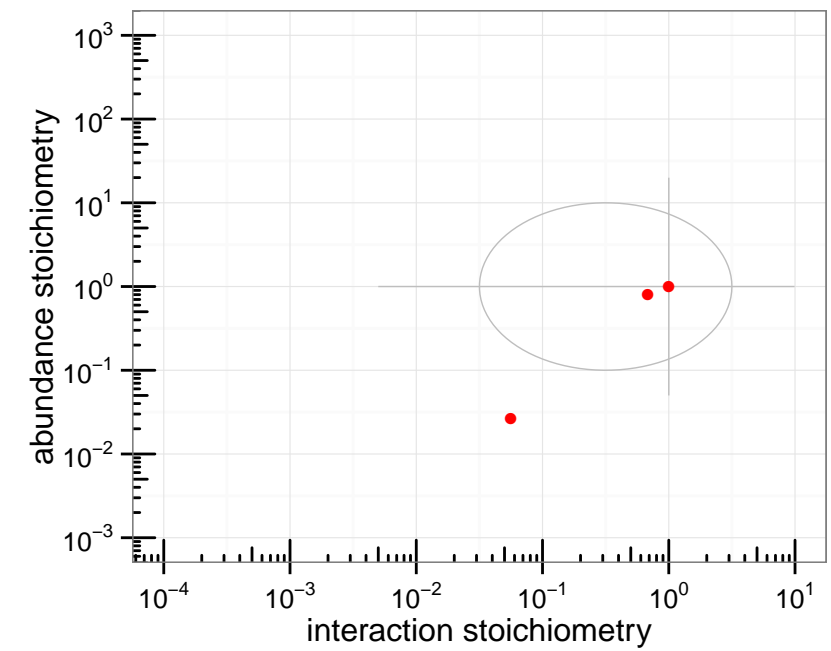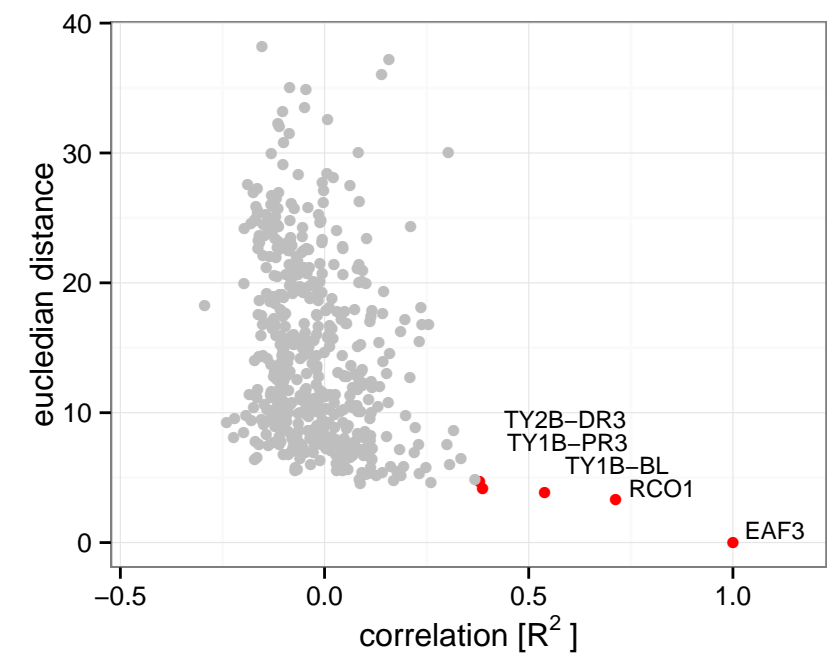

**Interactor class**

● A+

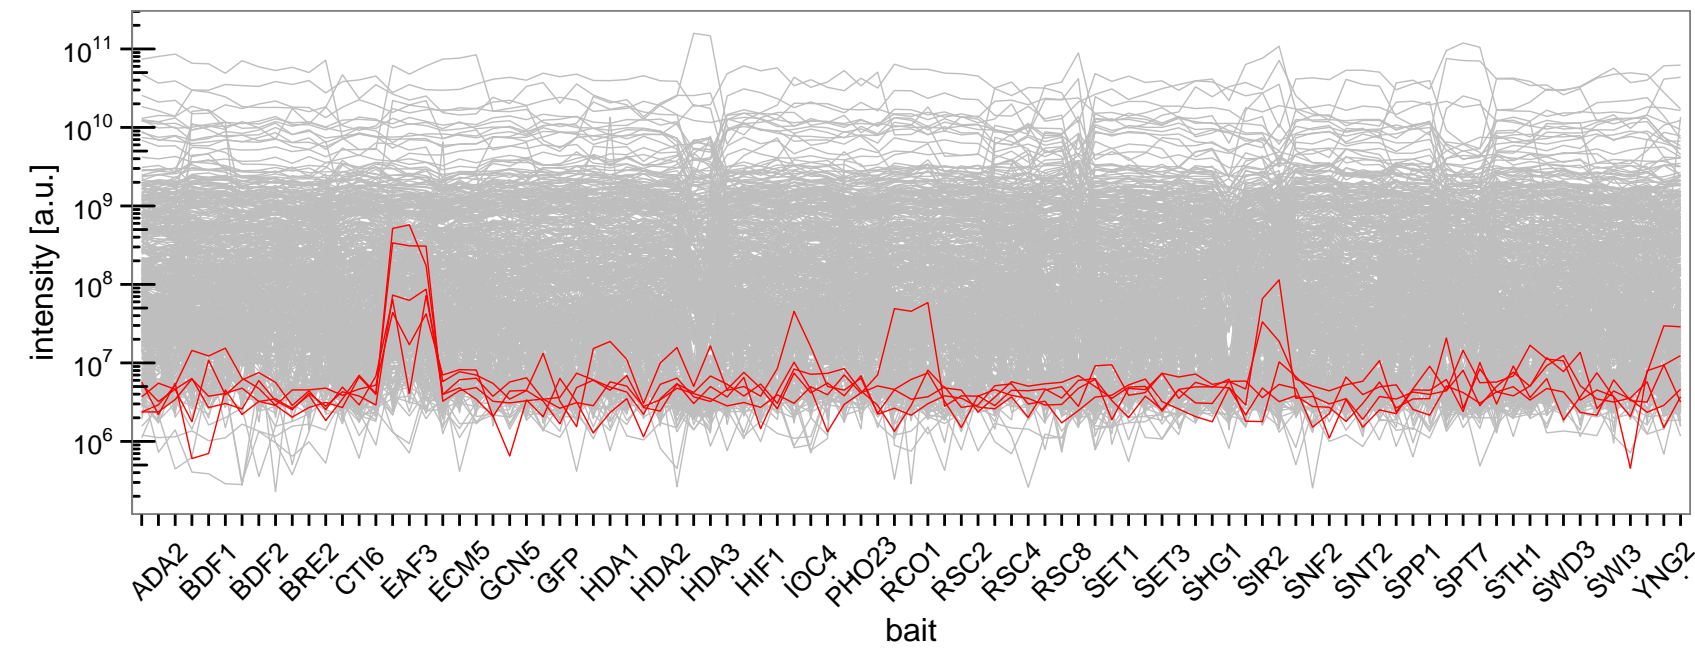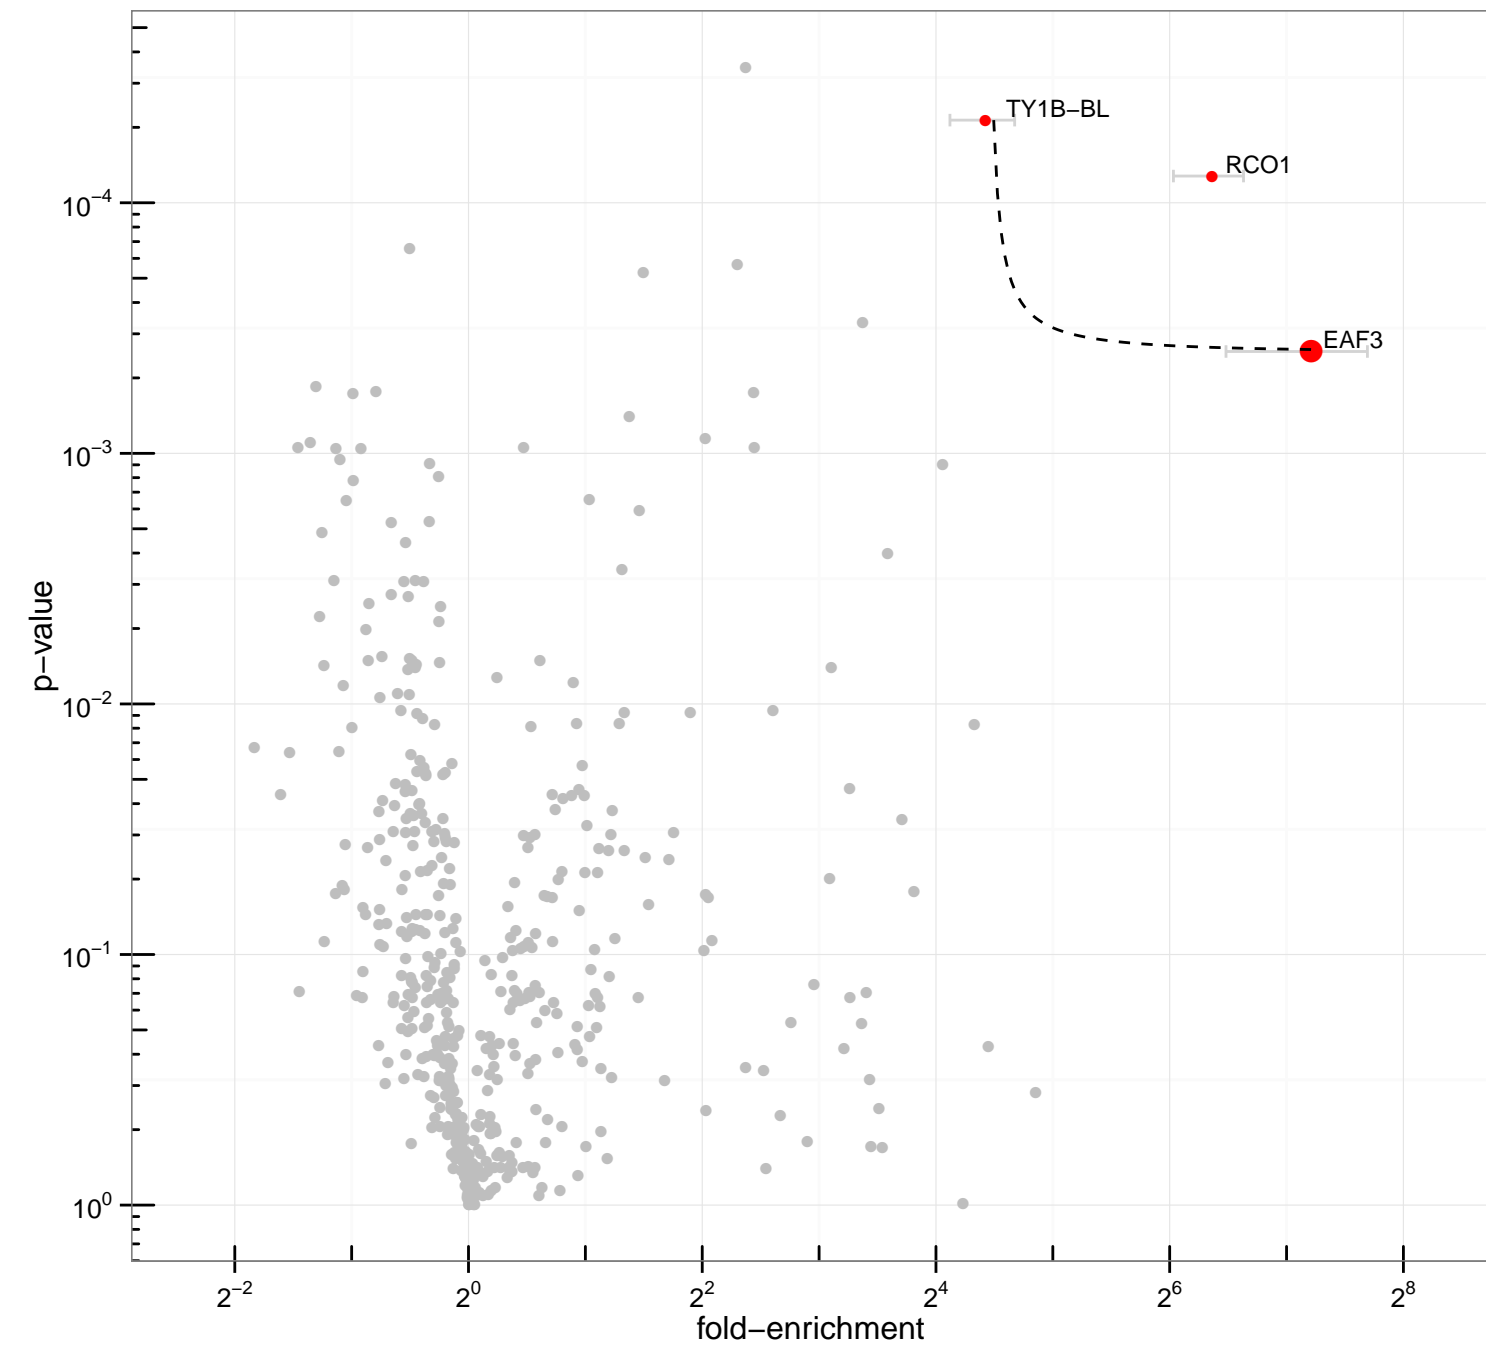

|                         | EAF3 | RCO1 | TY1B-BL |
|-------------------------|------|------|---------|
| <i>significance</i>     | 7.1  | 6.8  | 5.5     |
| <i>interactor class</i> | A+   | A+   | A+      |



|                   |            |
|-------------------|------------|
| <b>bait</b>       | ECM5       |
| <b>experiment</b> | 14 minutes |

|                    |     |
|--------------------|-----|
| <b>interactors</b> | 0   |
| <b>recovery</b>    | 0 % |

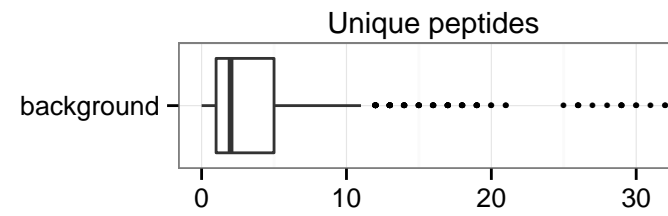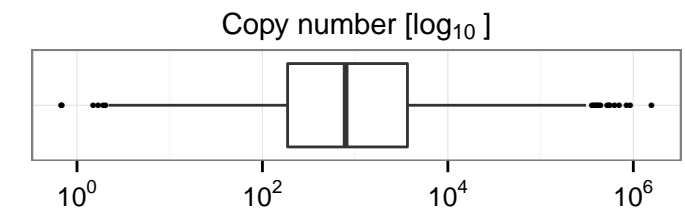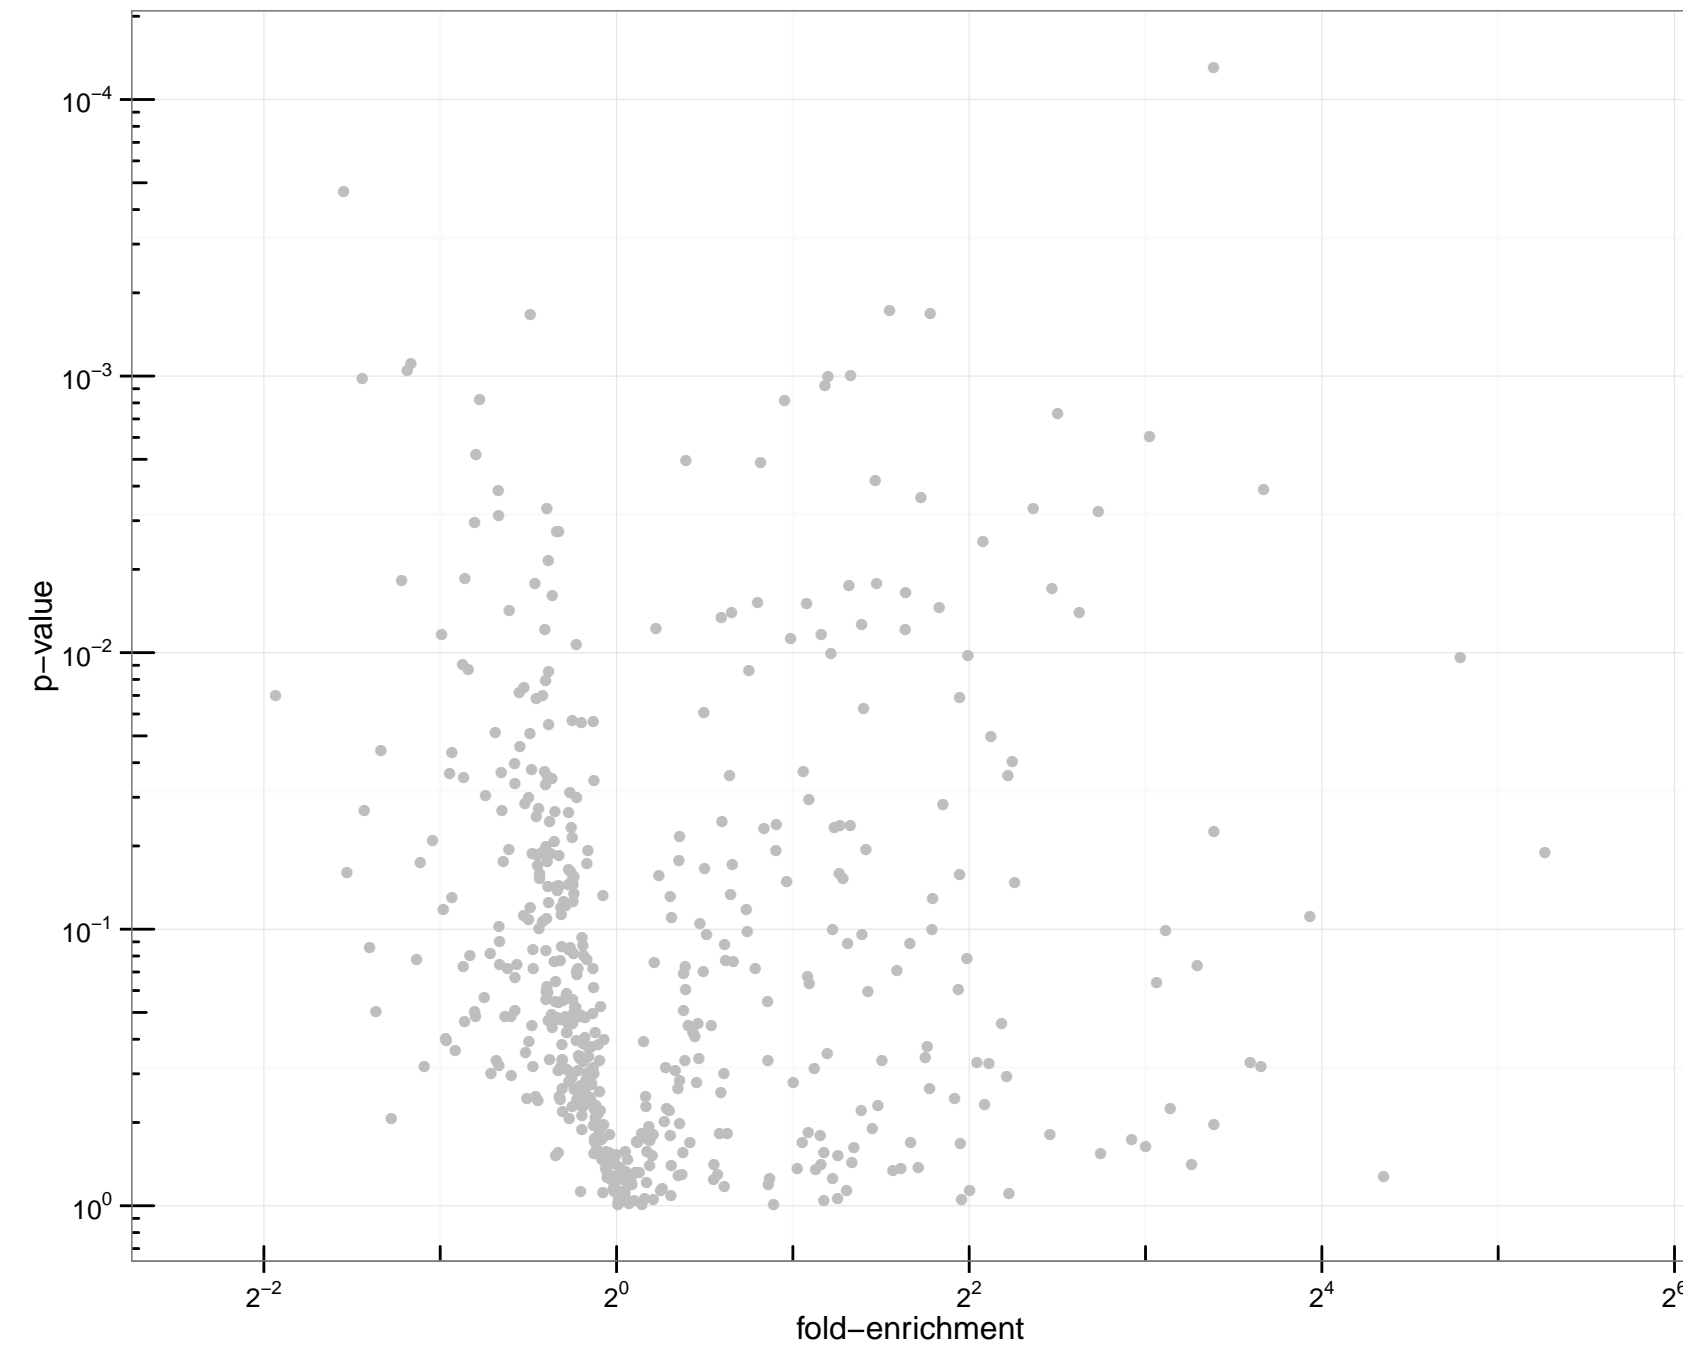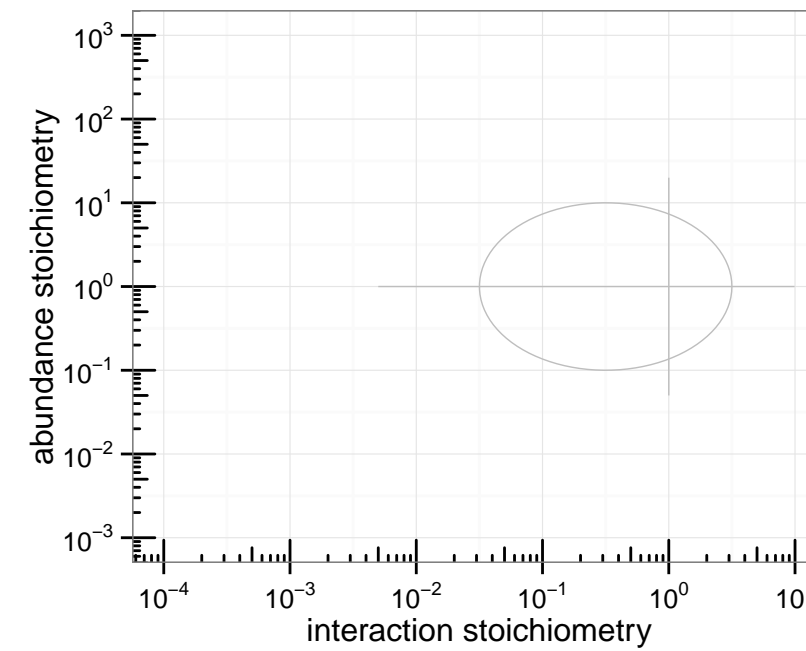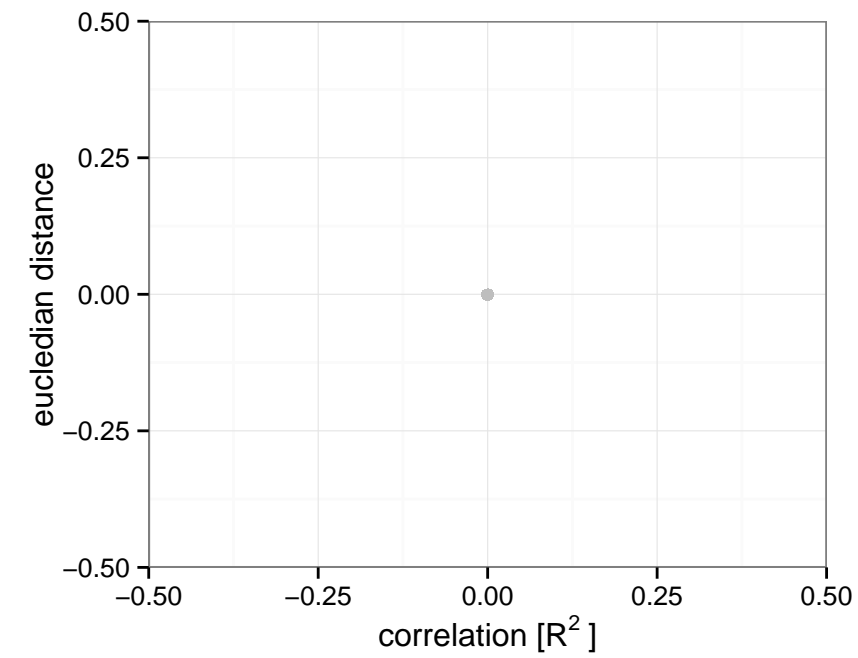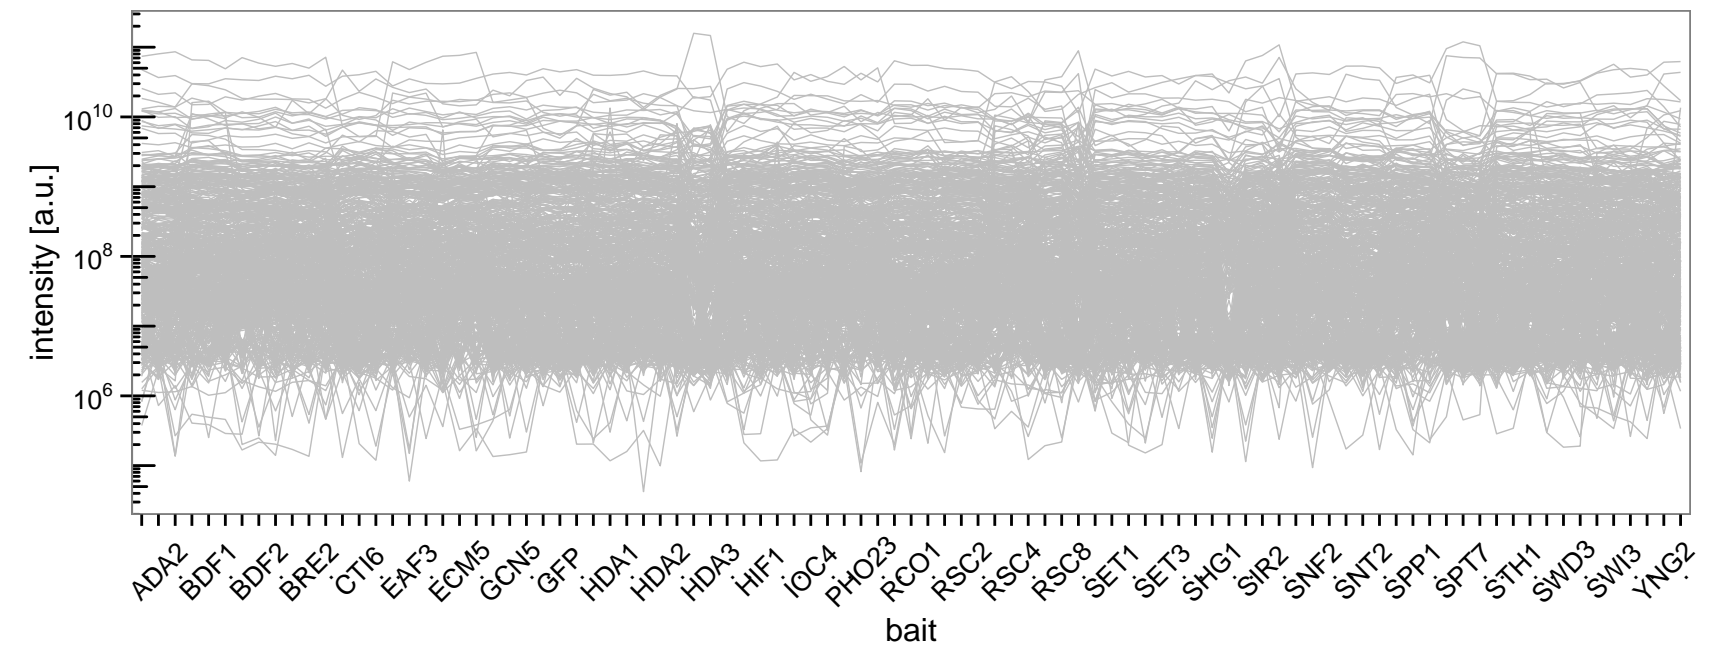

significance  
interactor class

|                   |            |
|-------------------|------------|
| <b>bait</b>       | GCN5       |
| <b>experiment</b> | 14 minutes |

|                    |      |
|--------------------|------|
| <b>interactors</b> | 16   |
| <b>recovery</b>    | 67 % |

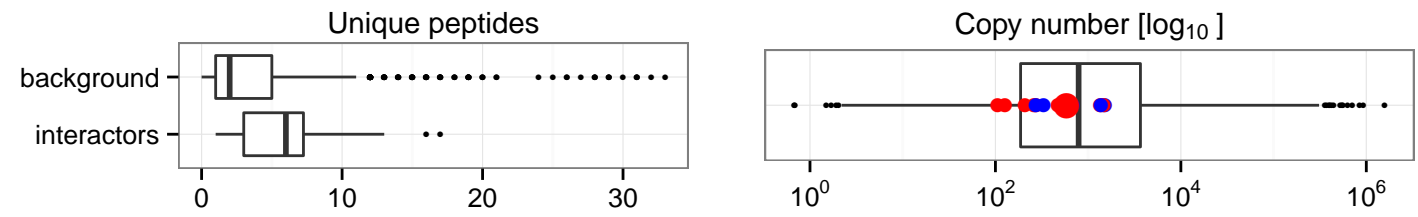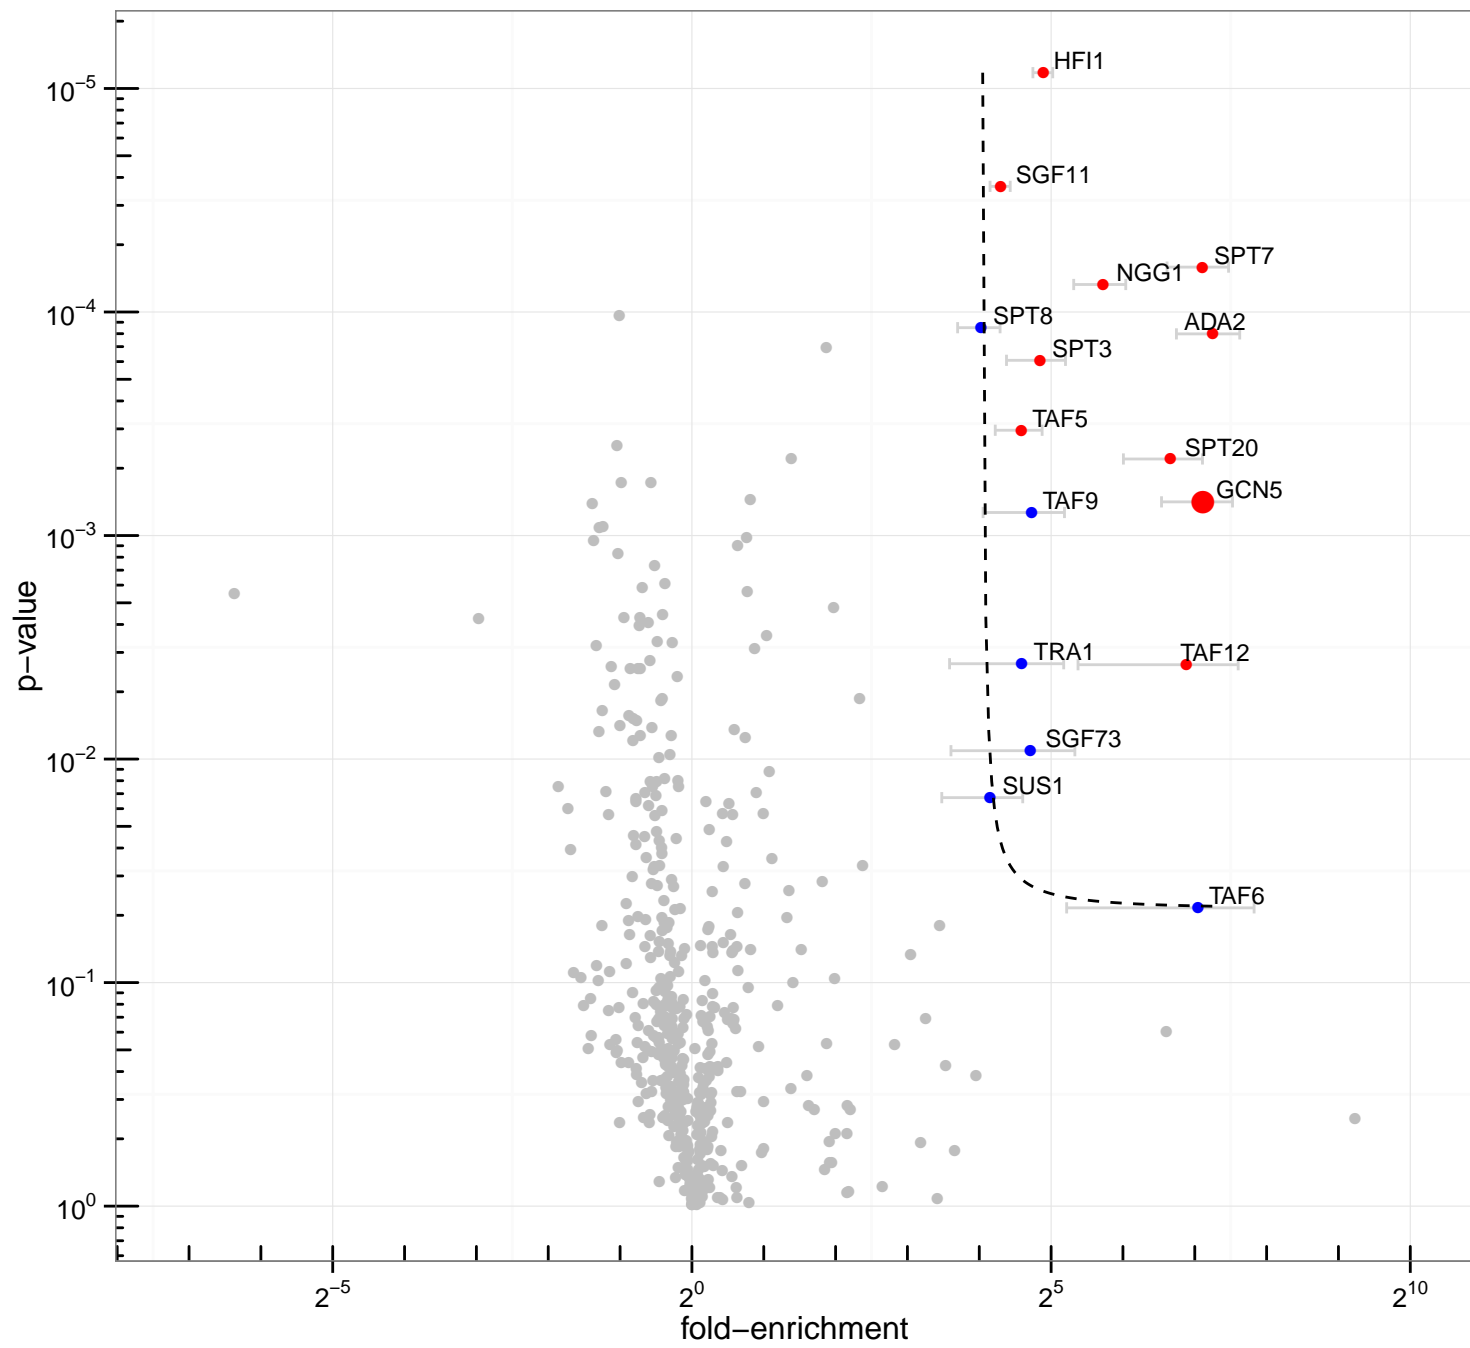

**Interactor class**

- A+
- B+

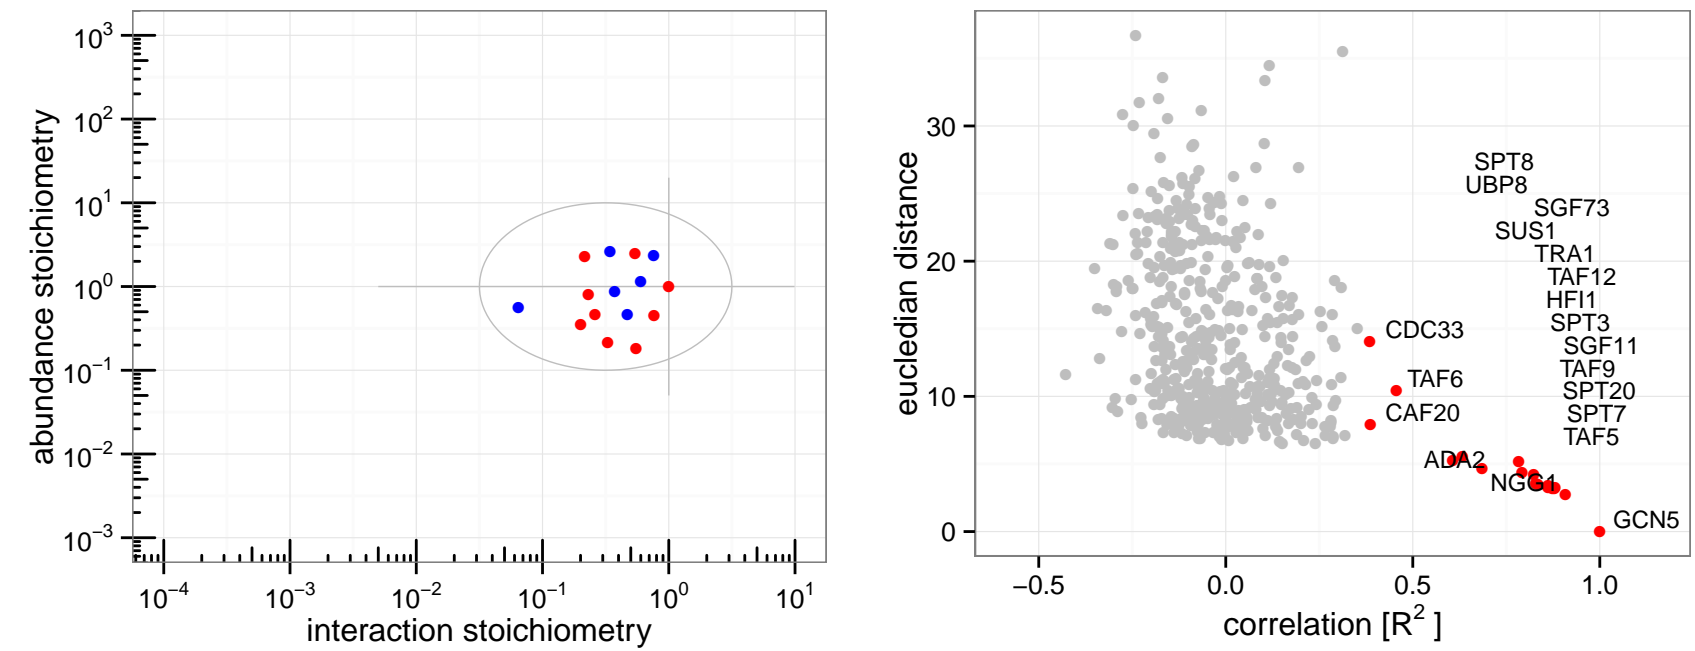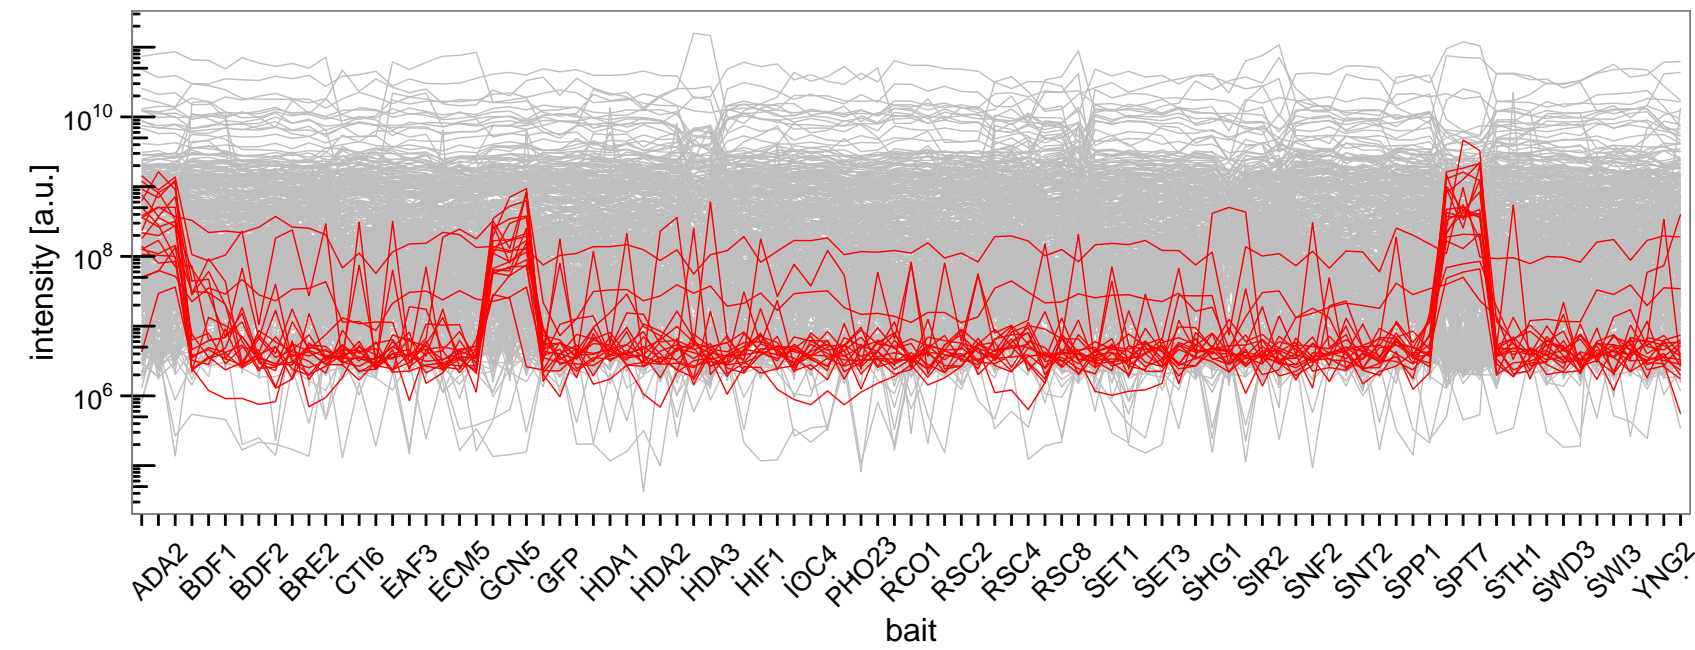

|                         | ADA2 | GCN5 | HF1 | NGG1 | SGF11 | SGF73 | SPT20 | SPT3 | SPT7 | SPT8 | SUS1 | TAF12 | TAF5 | TAF6 | TAF9 | TRA1 |
|-------------------------|------|------|-----|------|-------|-------|-------|------|------|------|------|-------|------|------|------|------|
| <i>significance</i>     | 7.4  | 6.9  | 6.4 | 6.3  | 5.6   | 4.2   | 6.6   | 5.4  | 7.4  | 5.0  | 3.6  | 6.4   | 5.0  | 6.2  | 4.9  | 4.3  |
| <i>interactor class</i> | A+   | A+   | A+  | A+   | A+    | B+    | A+    | A+   | A+   | B+   | B+   | A+    | A+   | B+   | B+   | B+   |

|                   |            |
|-------------------|------------|
| <b>bait</b>       | GFP        |
| <b>experiment</b> | 14 minutes |

|                    |       |
|--------------------|-------|
| <b>interactors</b> | 1     |
| <b>recovery</b>    | NaN % |

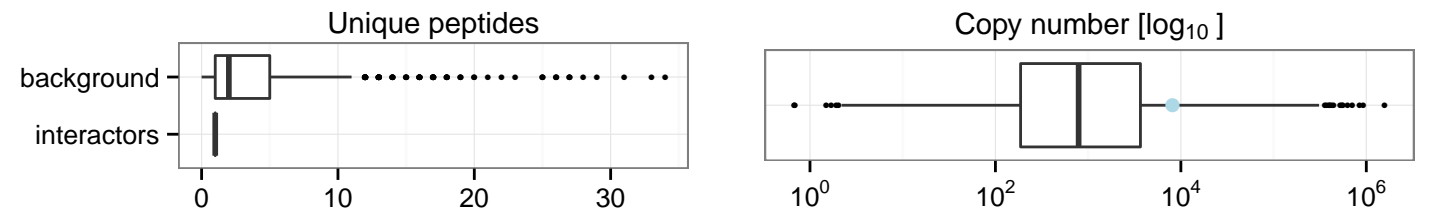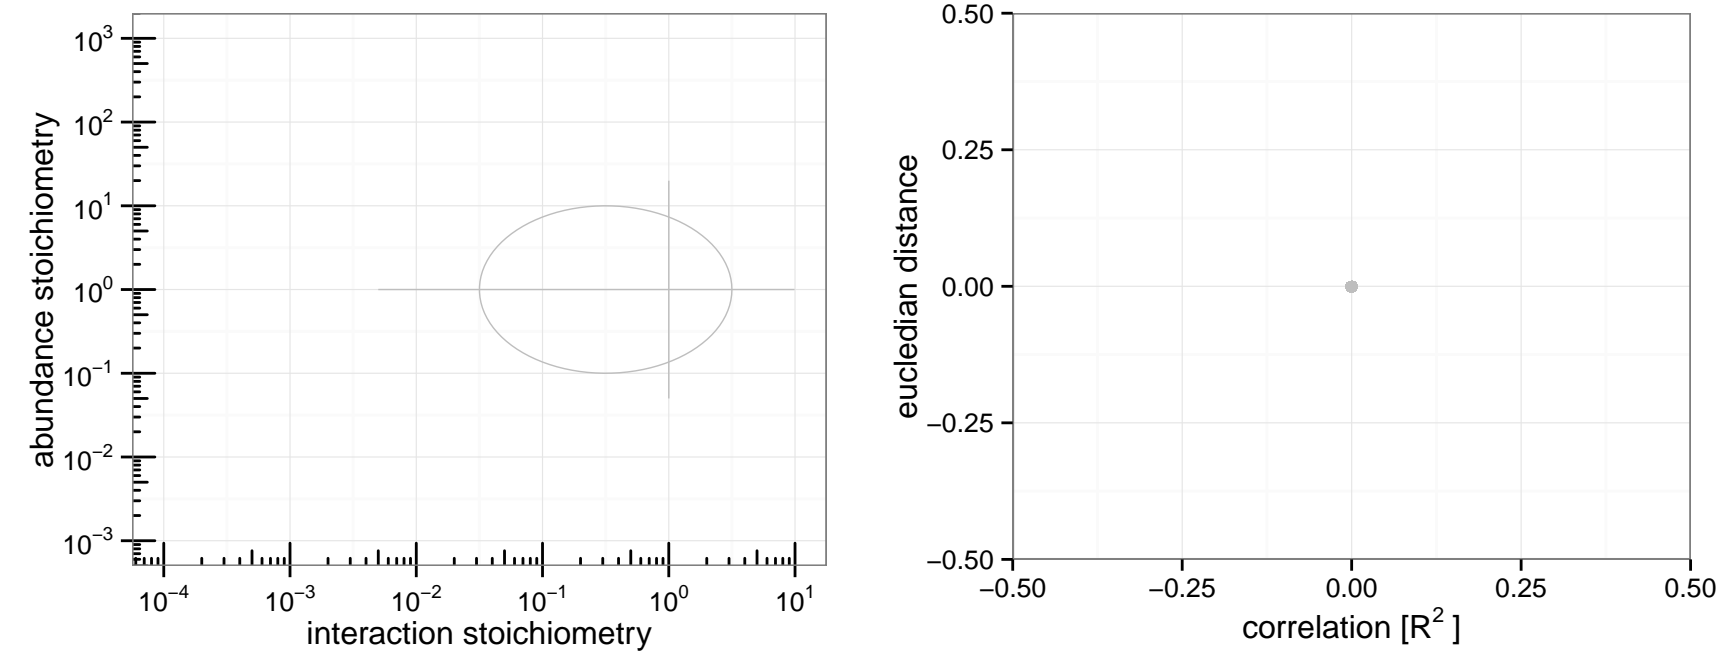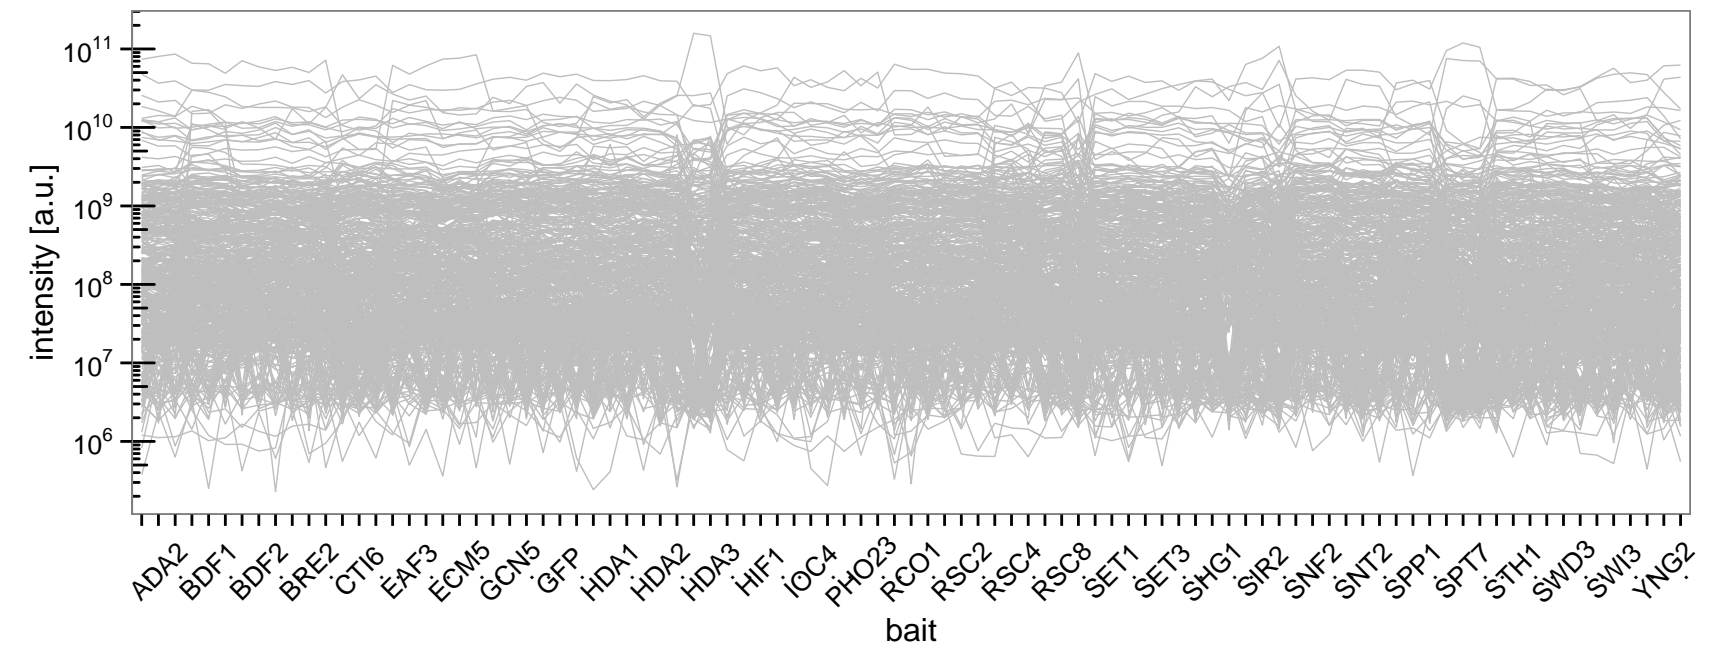

**Interactor class**  
● B

*significance*  
*interactor class*

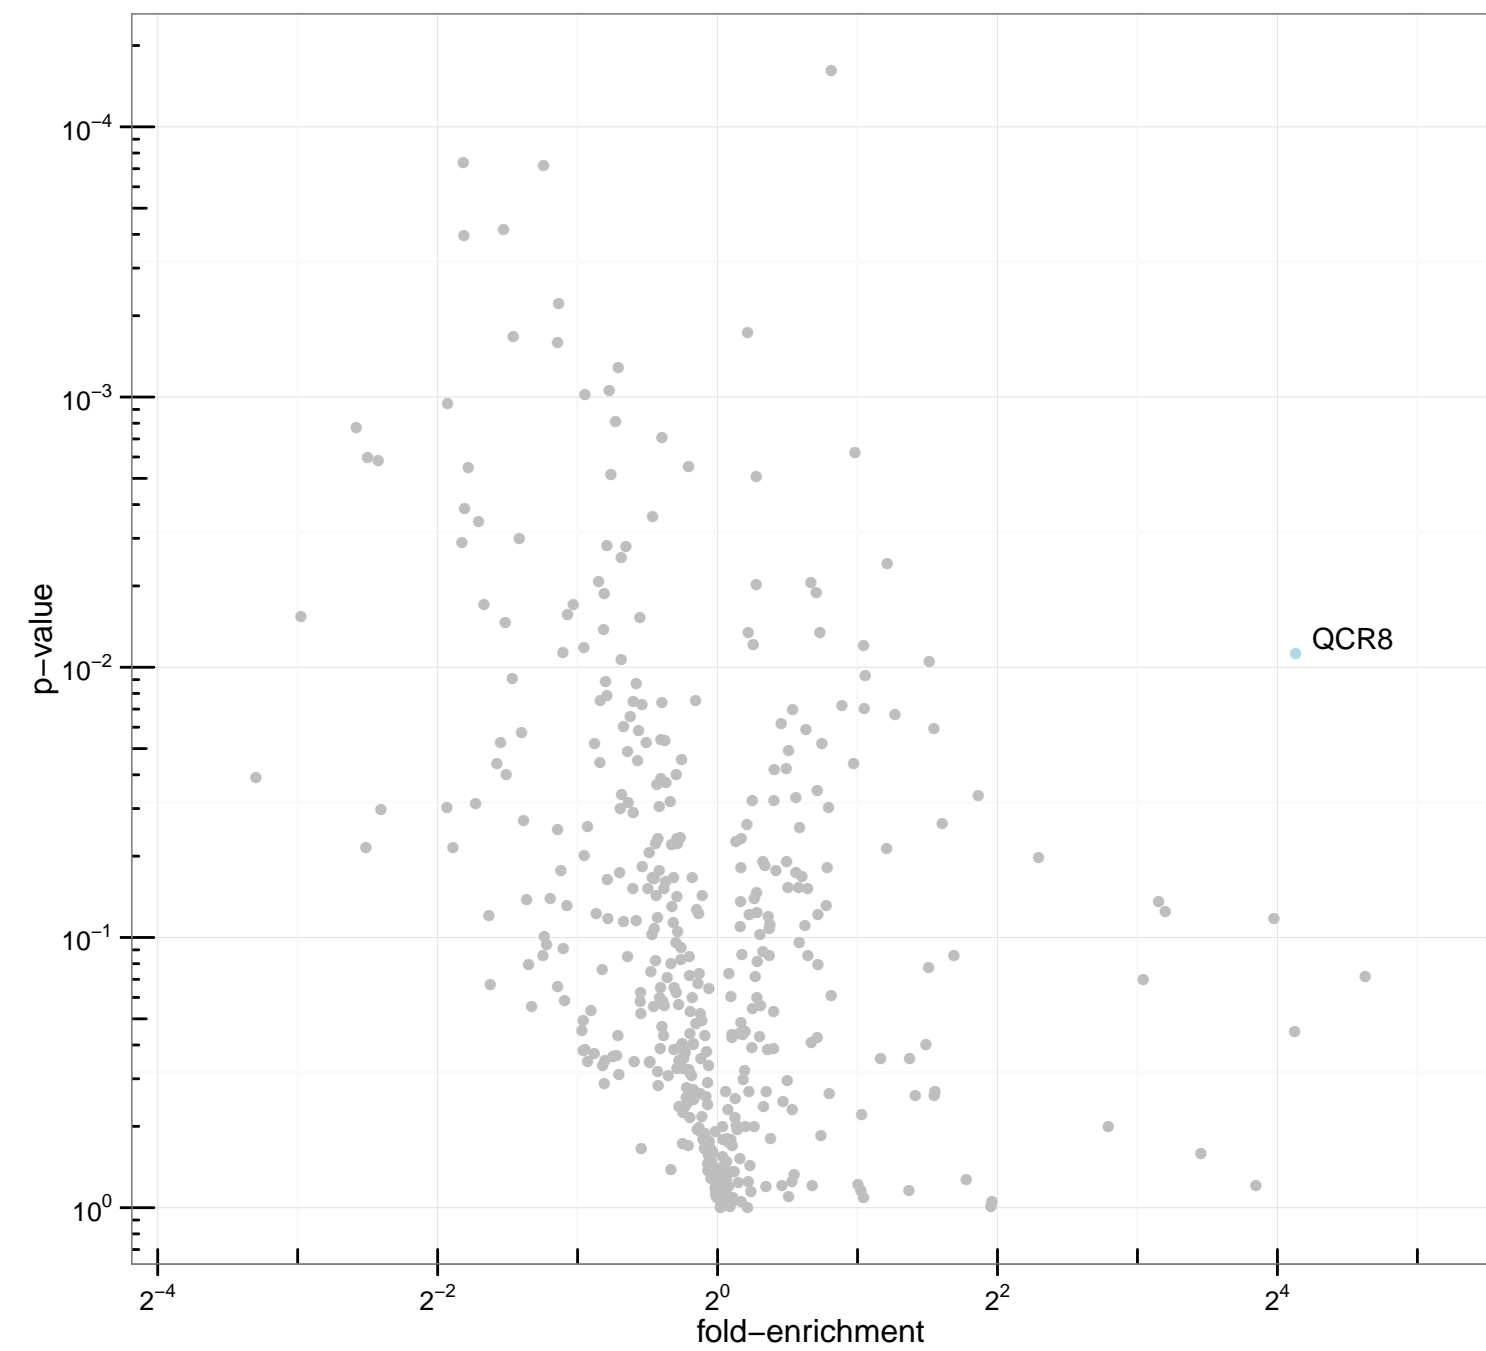

|                   |            |
|-------------------|------------|
| <b>bait</b>       | HDA1       |
| <b>experiment</b> | 14 minutes |

|                    |       |
|--------------------|-------|
| <b>interactors</b> | 3     |
| <b>recovery</b>    | 100 % |

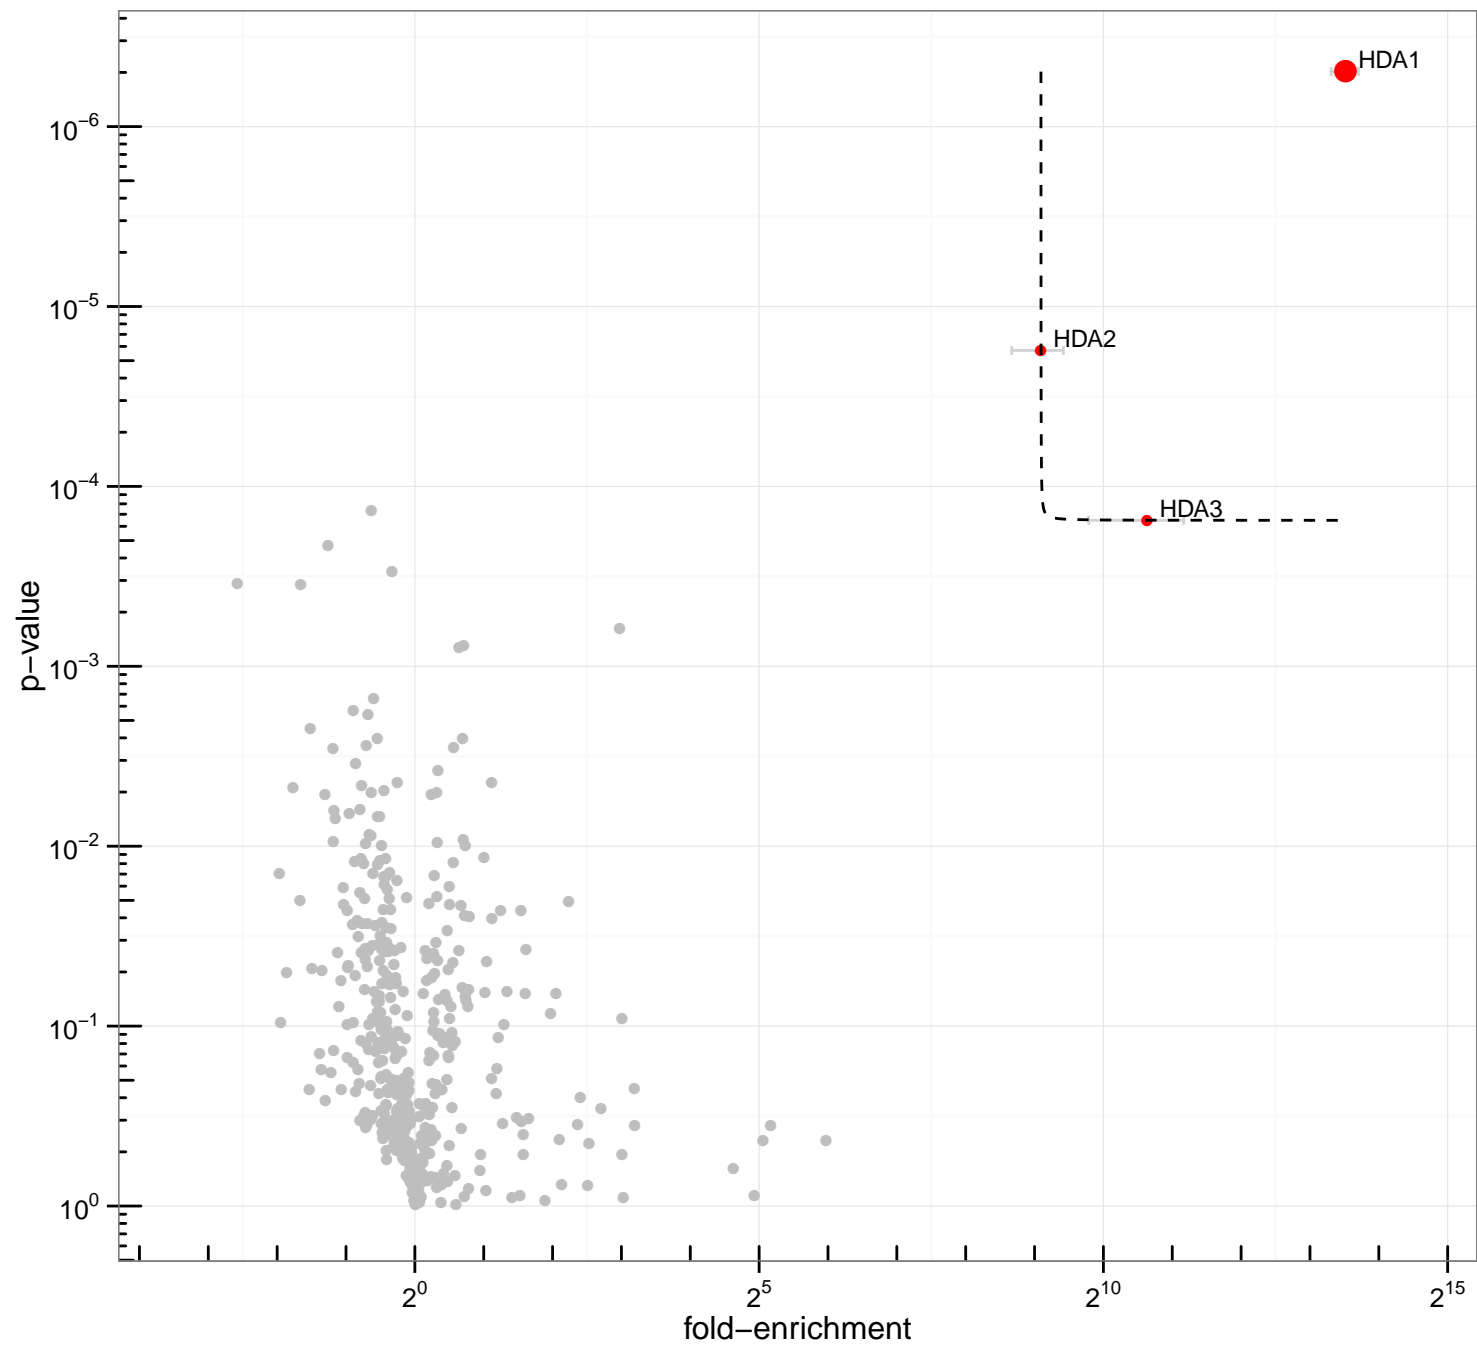

**Interactor class**  
● A+

|                         | HDA1 | HDA2 | HDA3 |
|-------------------------|------|------|------|
| <i>significance</i>     | 14.0 | 9.4  | 10.0 |
| <i>interactor class</i> | A+   | A+   | A+   |

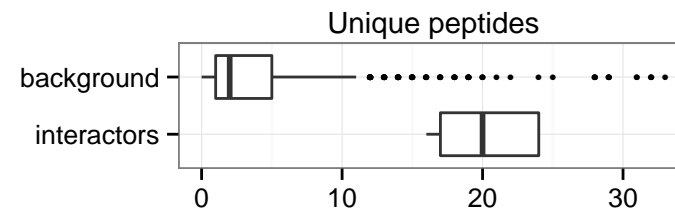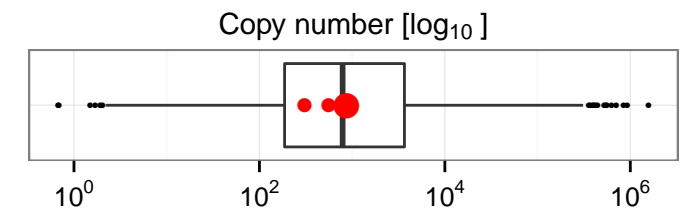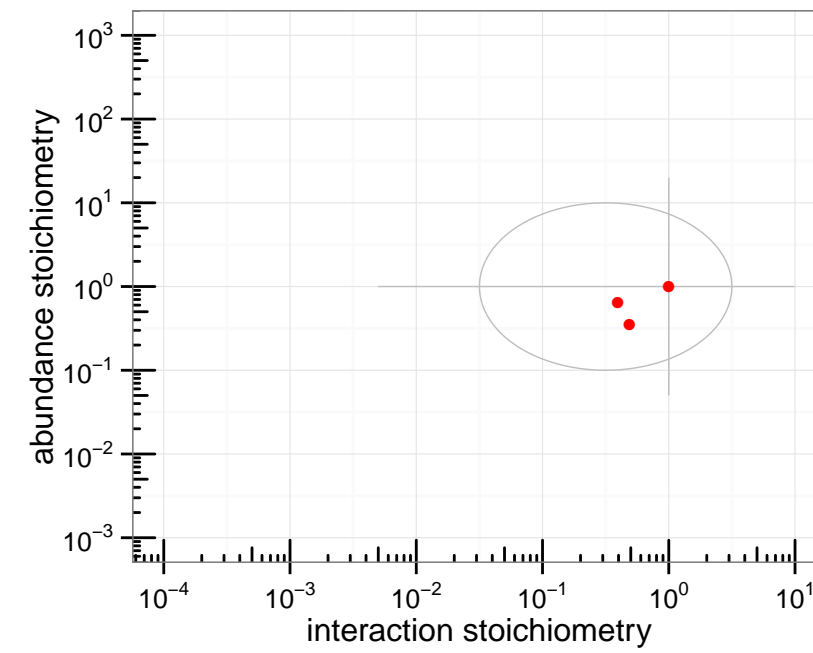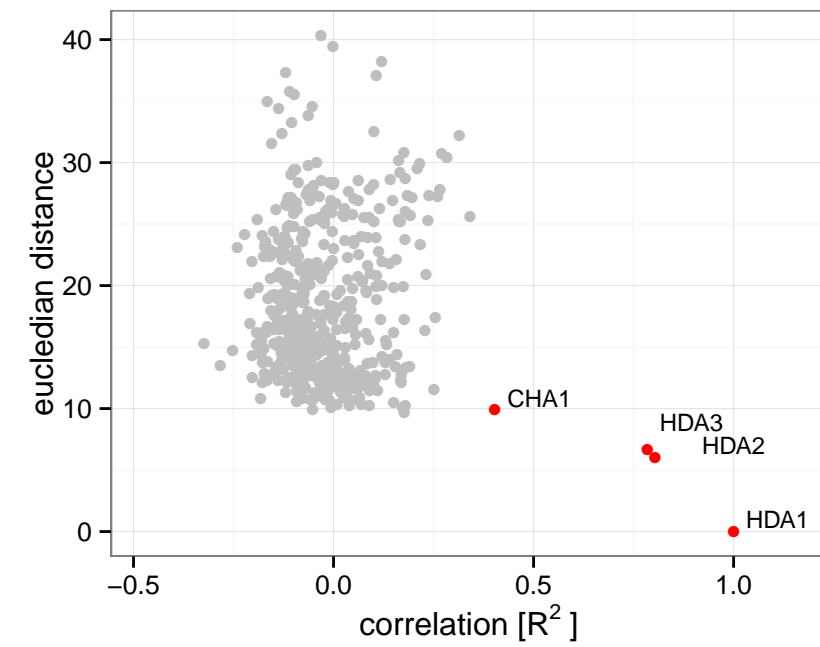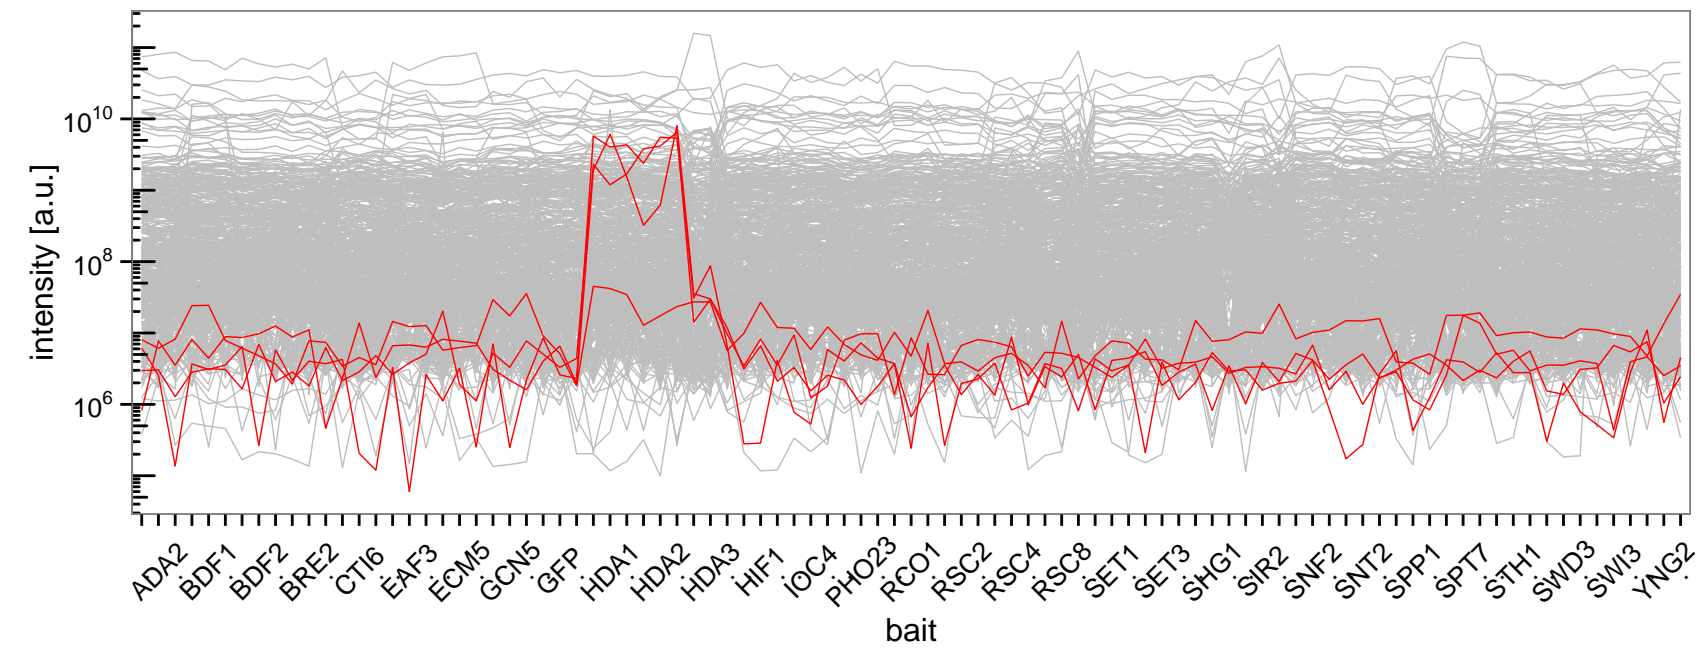

|                   |            |
|-------------------|------------|
| <b>bait</b>       | HDA2       |
| <b>experiment</b> | 14 minutes |

|                    |       |
|--------------------|-------|
| <b>interactors</b> | 3     |
| <b>recovery</b>    | 100 % |

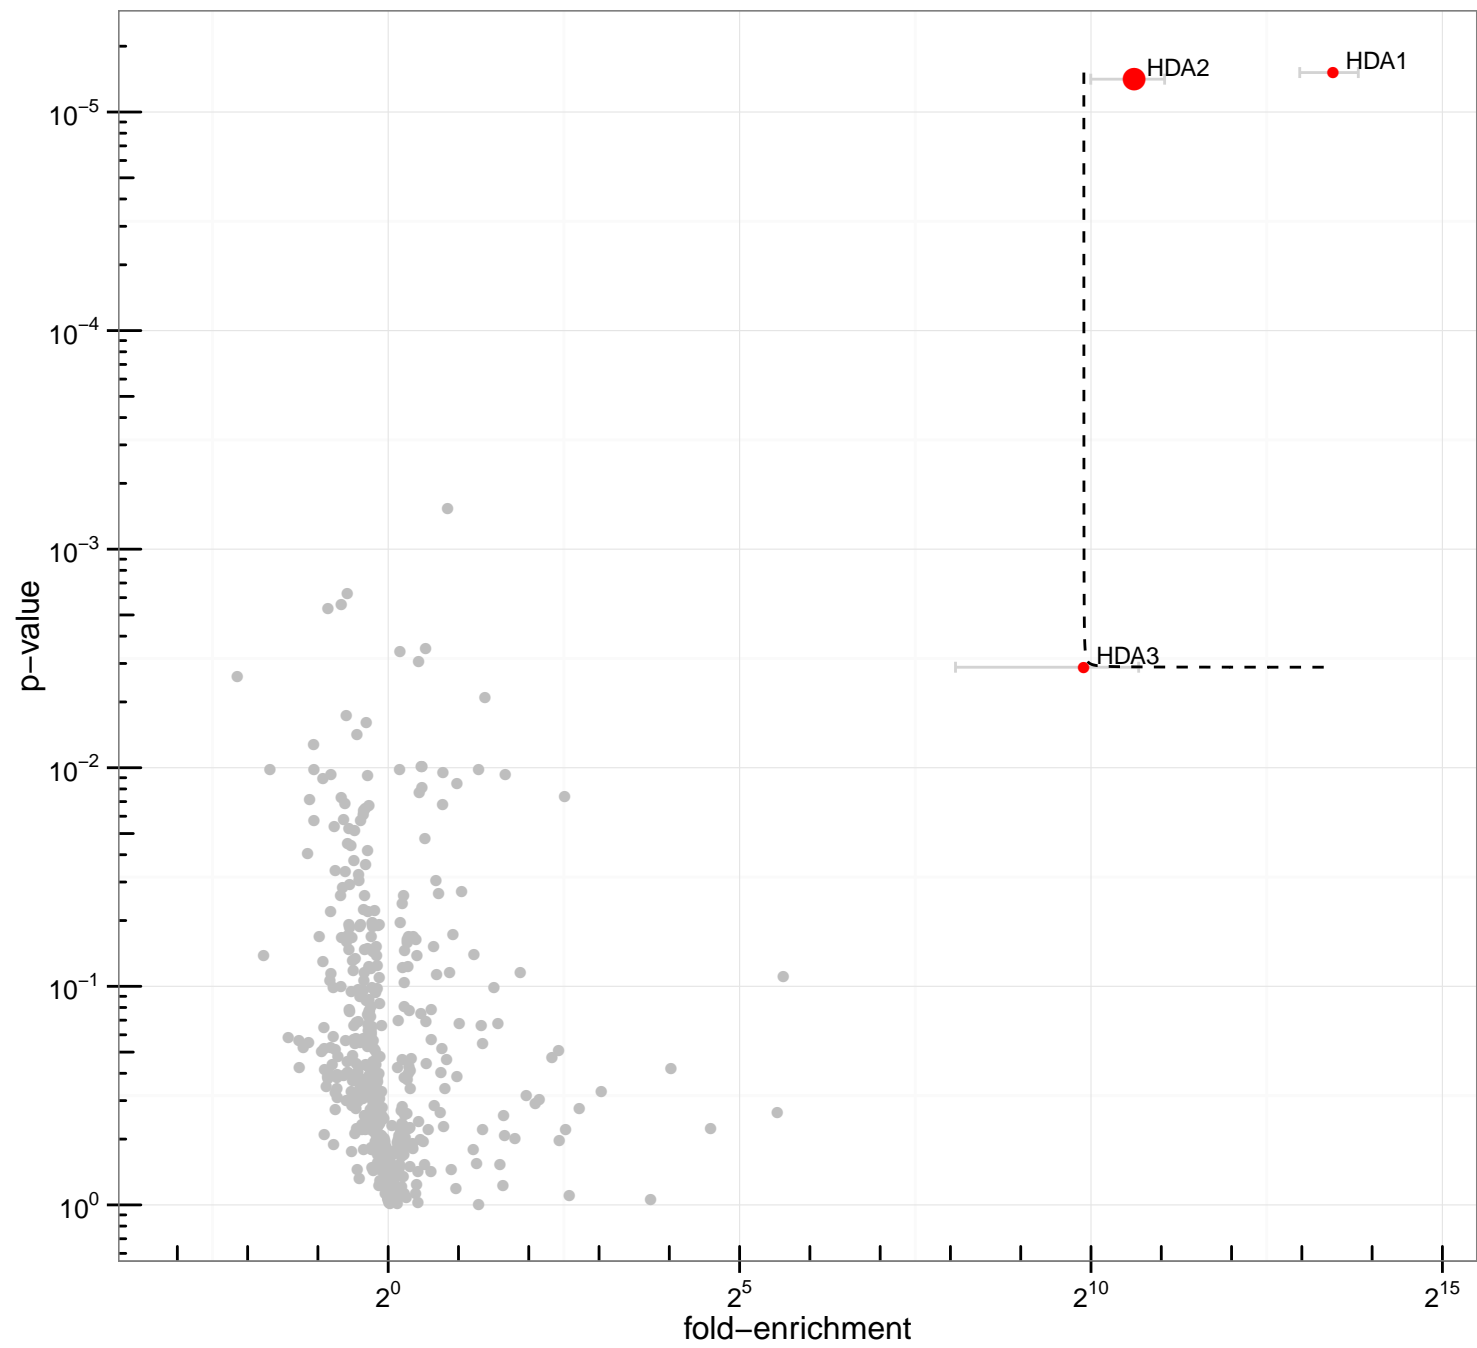

**Interactor class**  
● A+

|                         | HDA1 | HDA2 | HDA3 |
|-------------------------|------|------|------|
| <i>significance</i>     | 13.0 | 11.0 | 9.2  |
| <i>interactor class</i> | A+   | A+   | A+   |

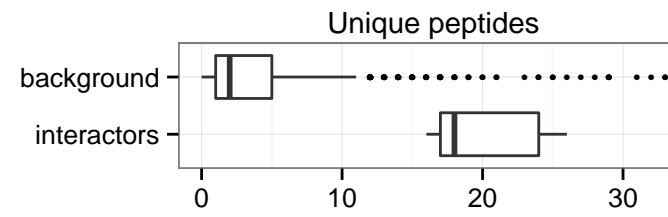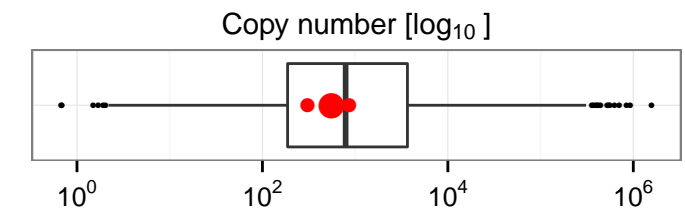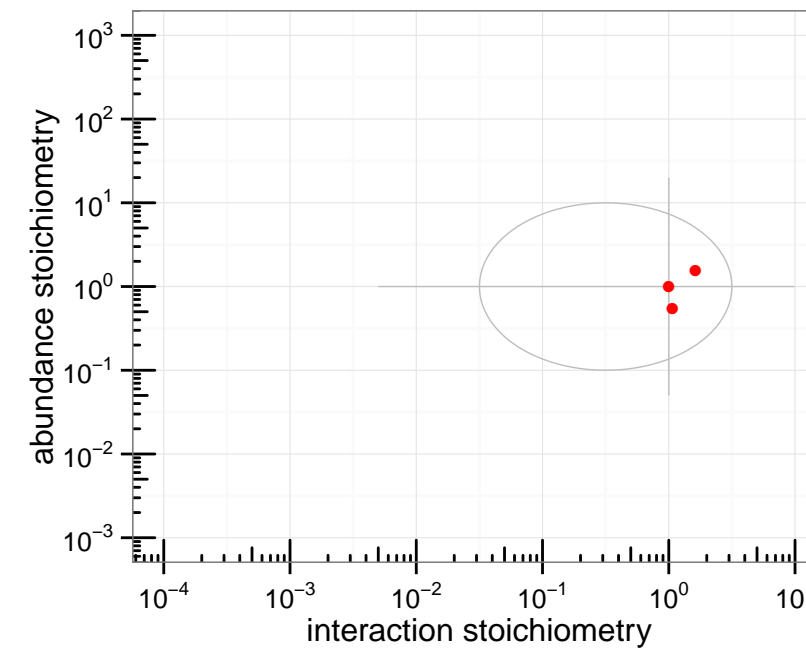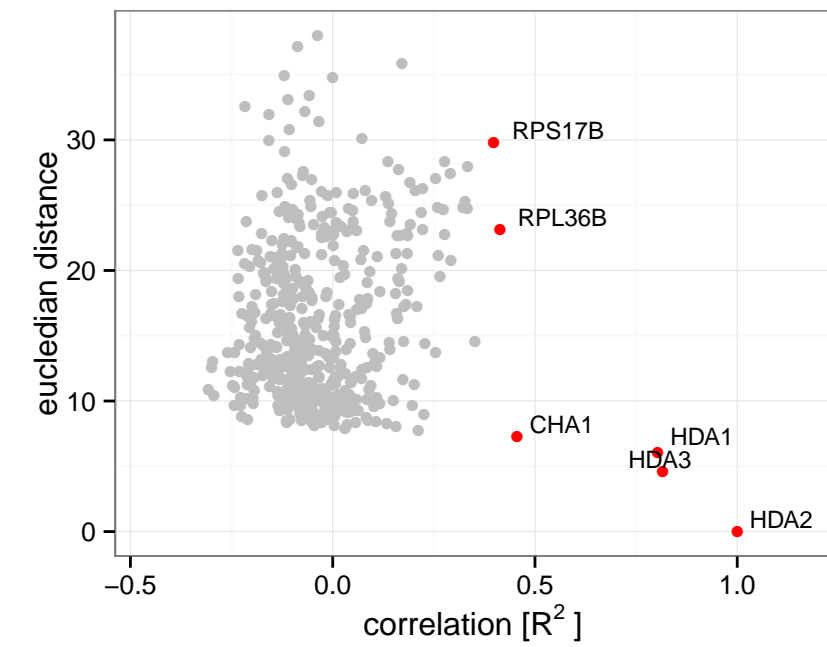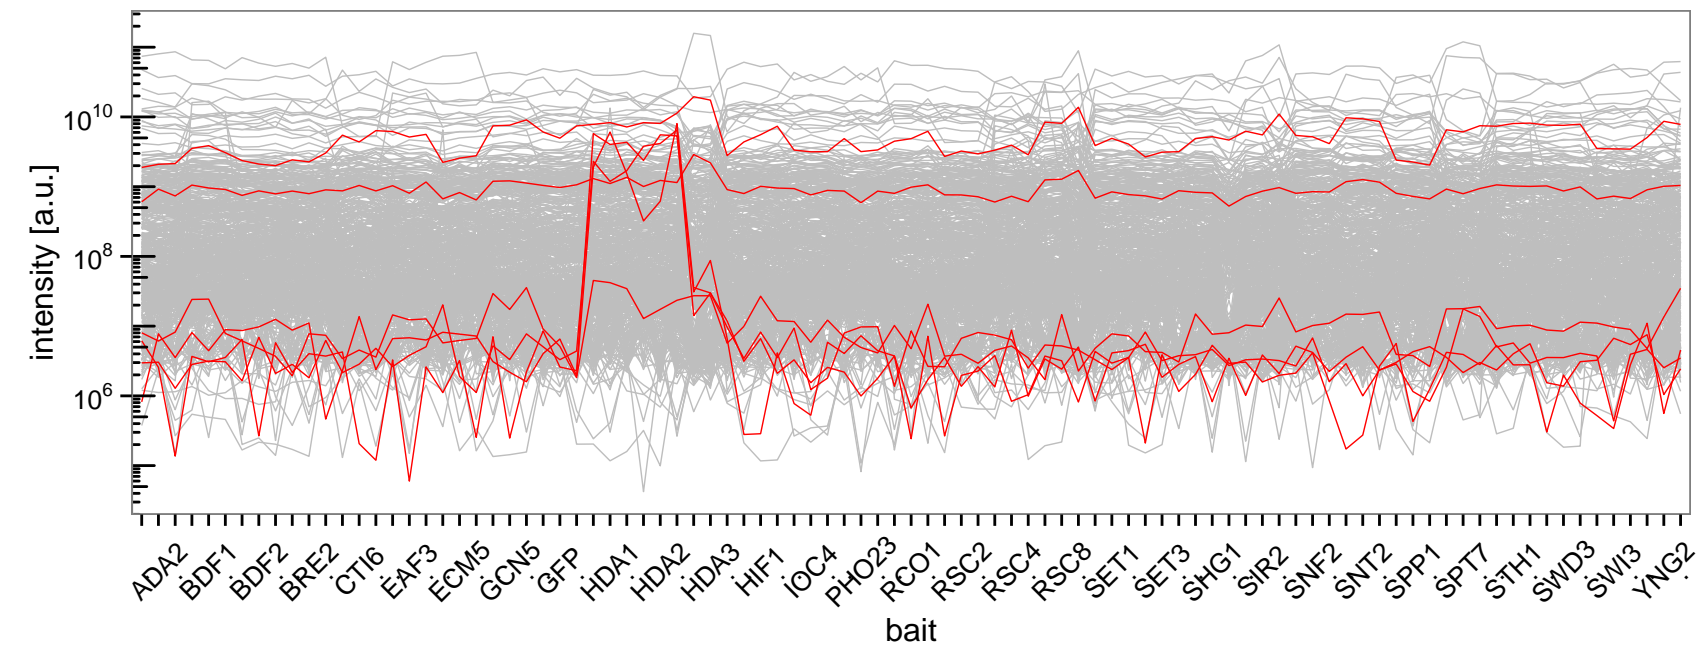

|                   |            |
|-------------------|------------|
| <b>bait</b>       | HDA3       |
| <b>experiment</b> | 14 minutes |

|                    |      |
|--------------------|------|
| <b>interactors</b> | 1    |
| <b>recovery</b>    | 50 % |

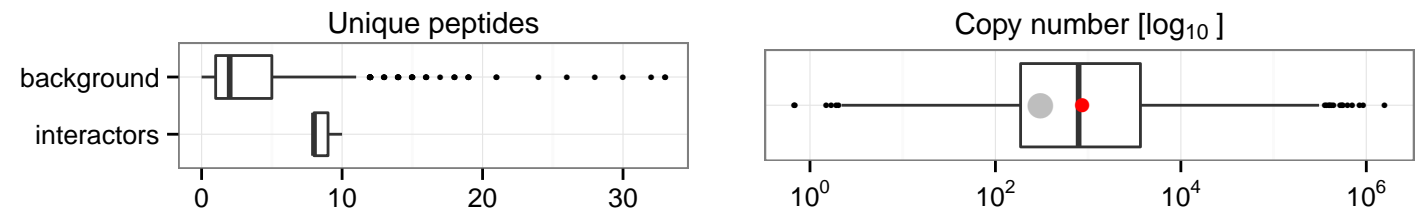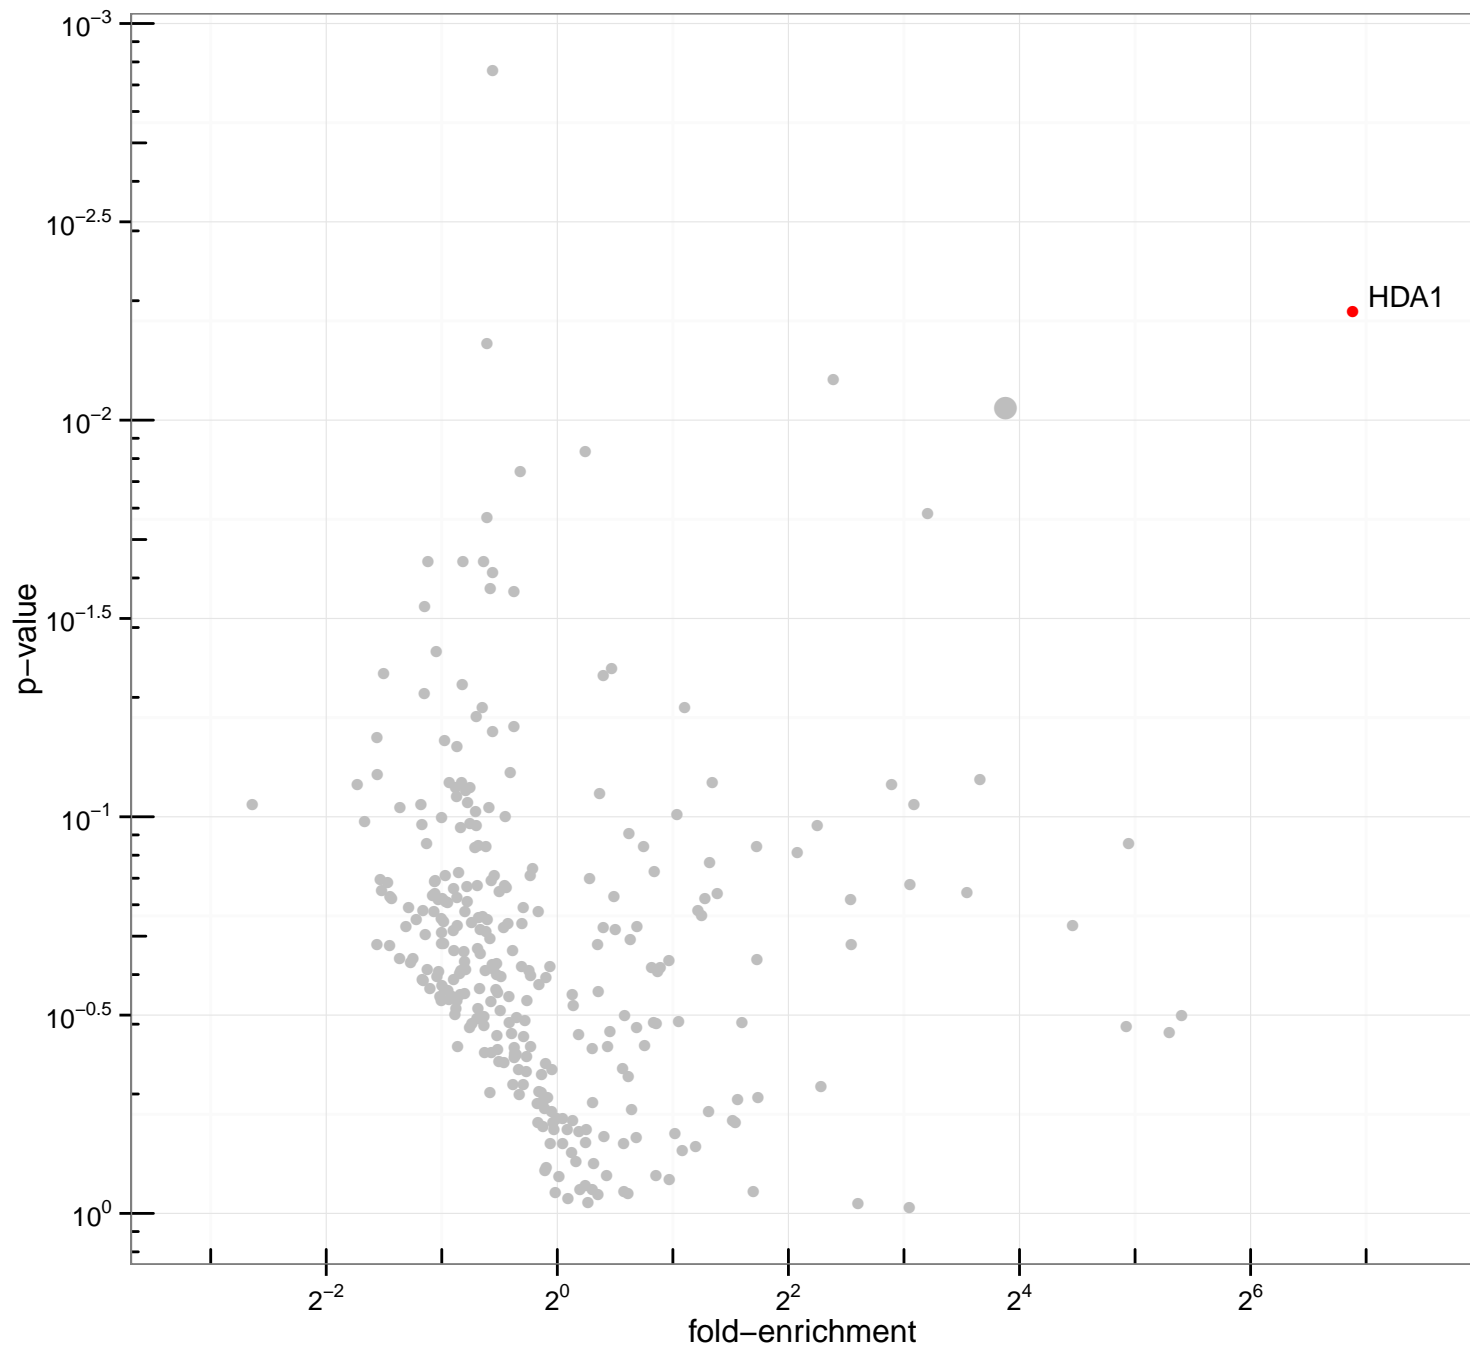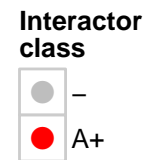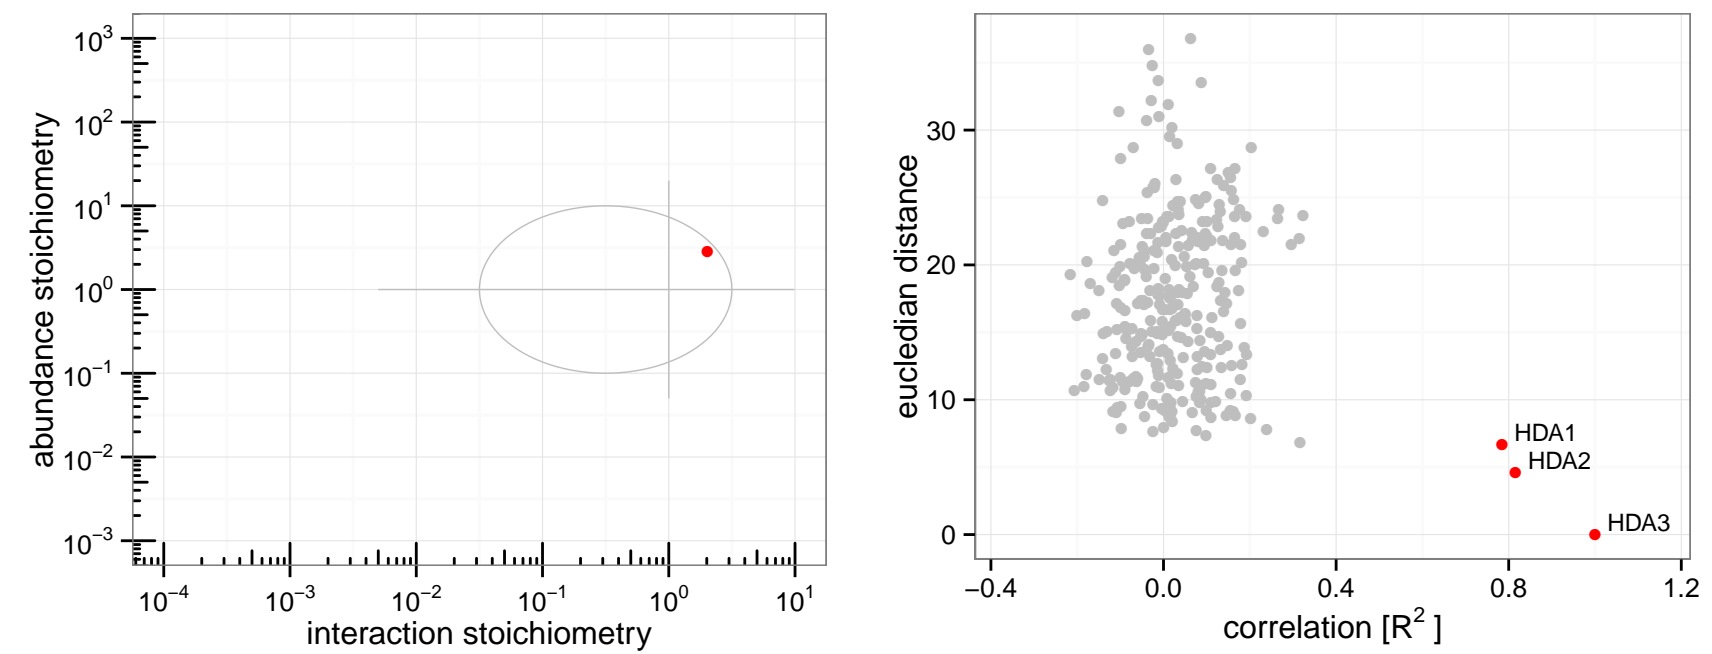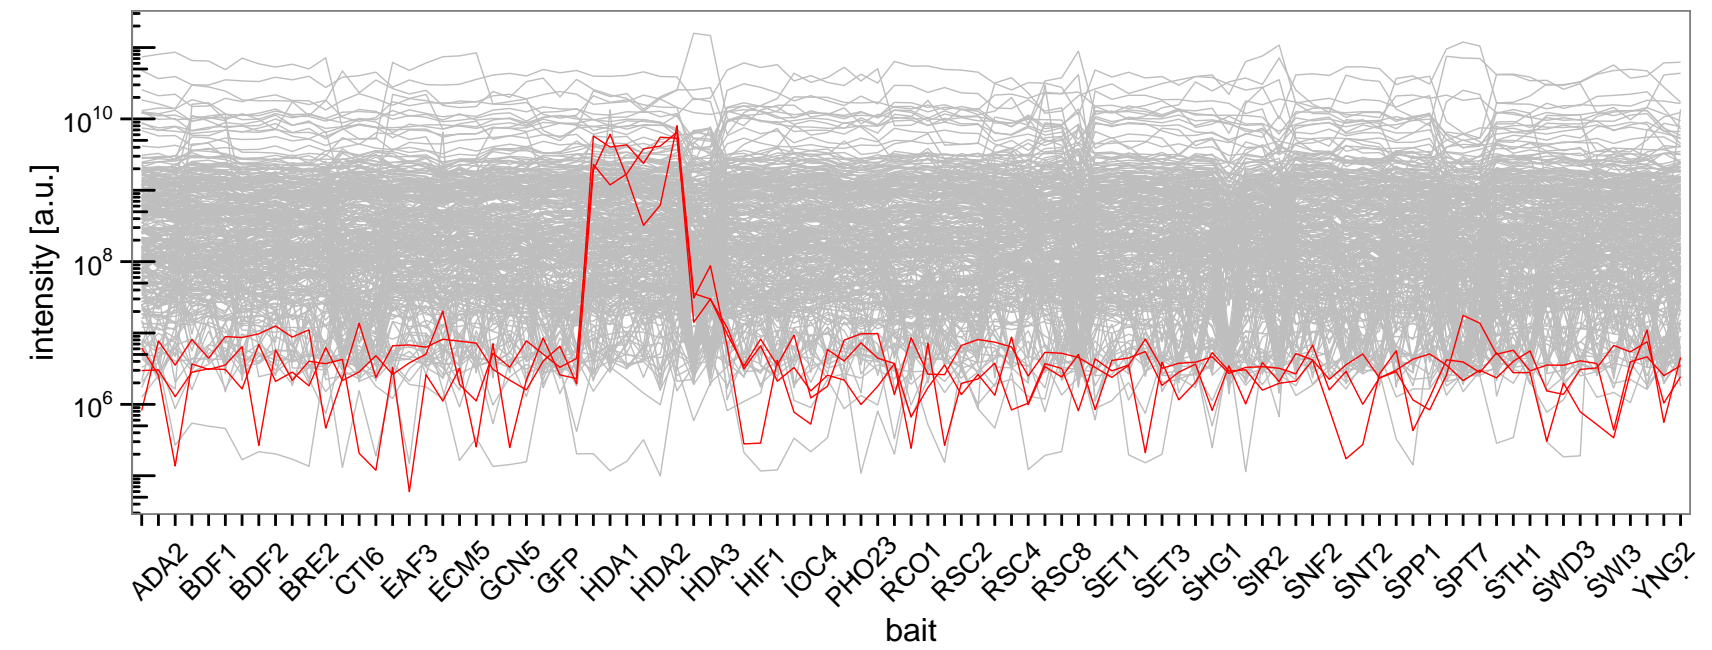

|                         |             |
|-------------------------|-------------|
|                         | <b>HDA1</b> |
| <i>significance</i>     | 6.3         |
| <i>interactor class</i> | A+          |

|                   |            |
|-------------------|------------|
| <b>bait</b>       | HIF1       |
| <b>experiment</b> | 14 minutes |

|                    |      |
|--------------------|------|
| <b>interactors</b> | 3    |
| <b>recovery</b>    | 33 % |

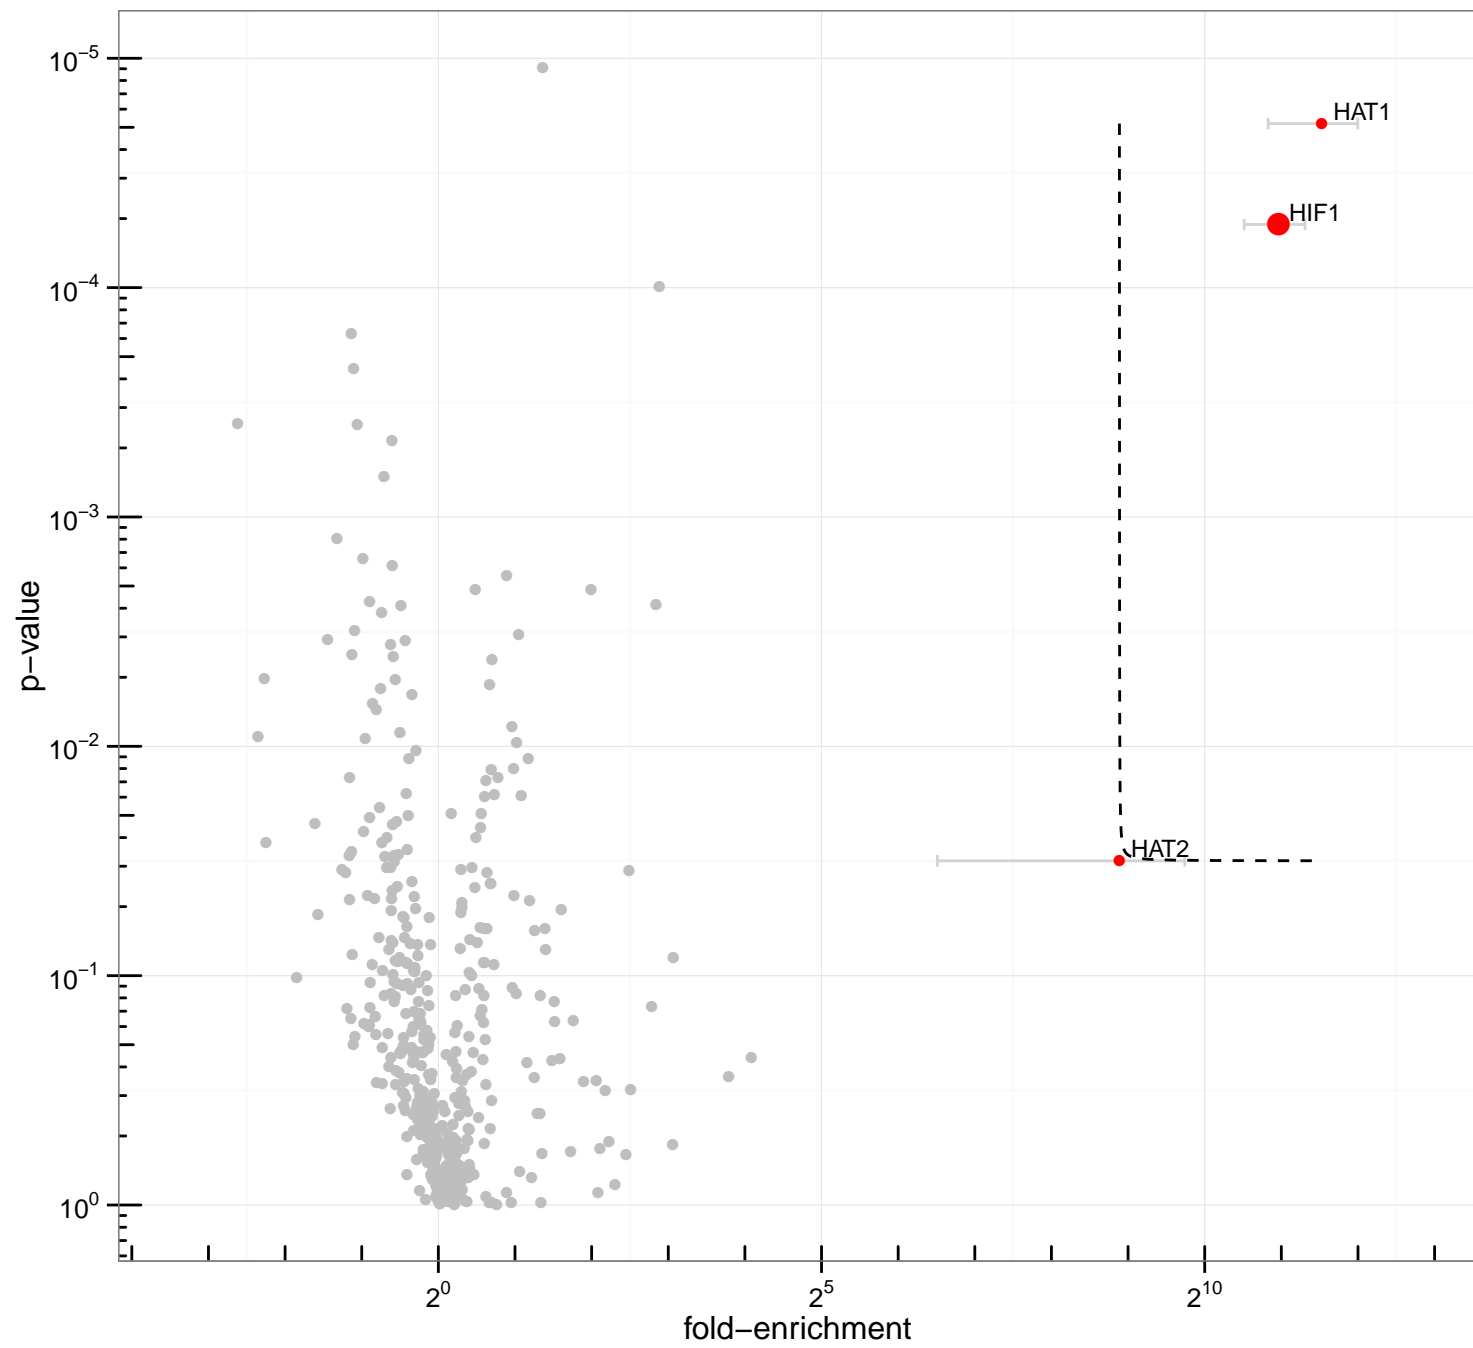

**Interactor class**  
● A+

|                         | HAT1 | HAT2 | HIF1 |
|-------------------------|------|------|------|
| <i>significance</i>     | 12   | 8    | 11   |
| <i>interactor class</i> | A+   | A+   | A+   |

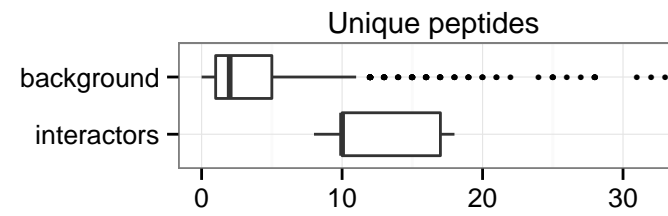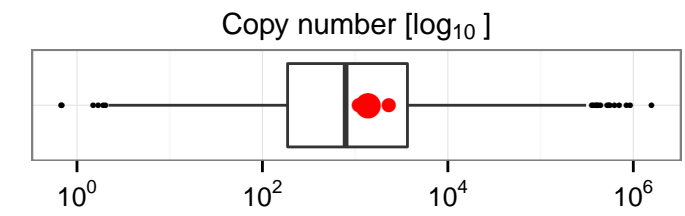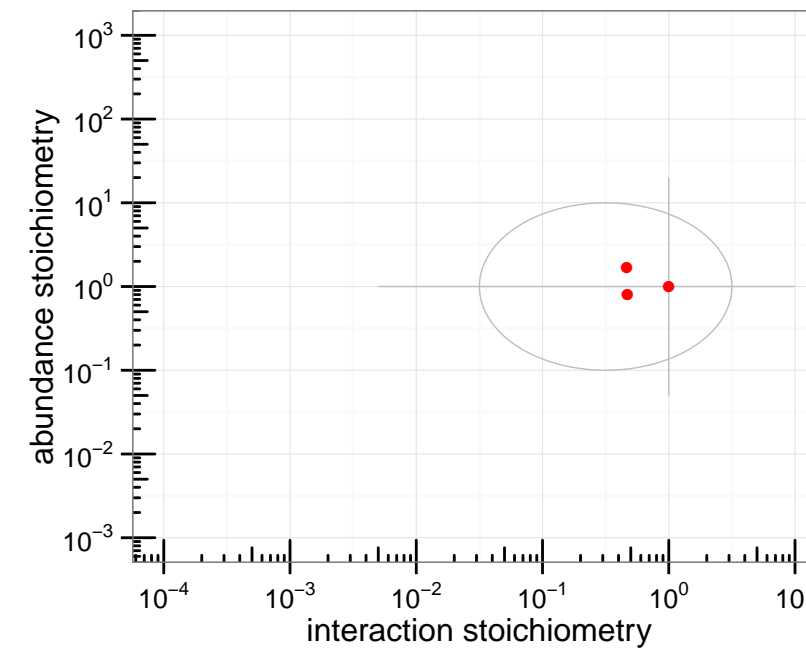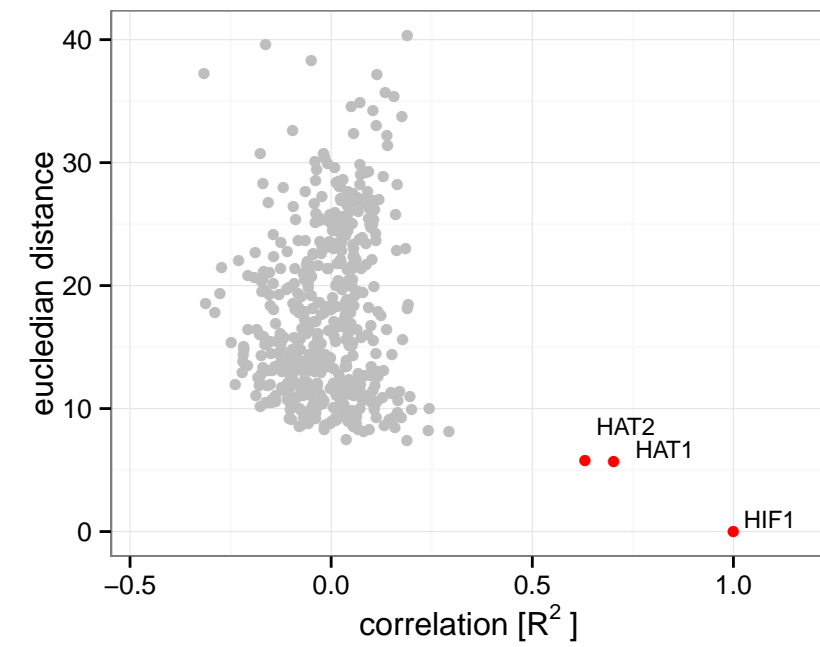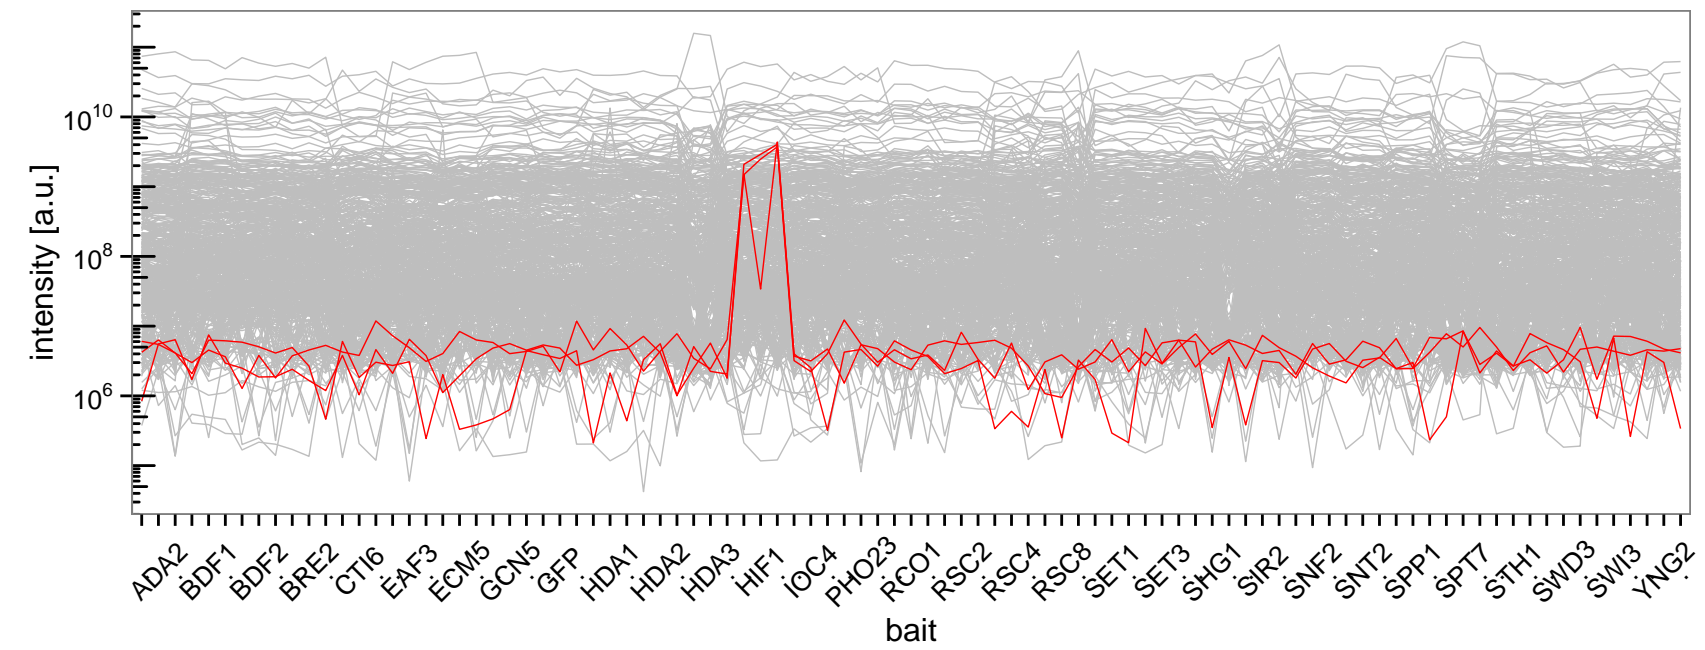

|                   |            |
|-------------------|------------|
| <b>bait</b>       | IOC4       |
| <b>experiment</b> | 14 minutes |

|                    |     |
|--------------------|-----|
| <b>interactors</b> | 0   |
| <b>recovery</b>    | 0 % |

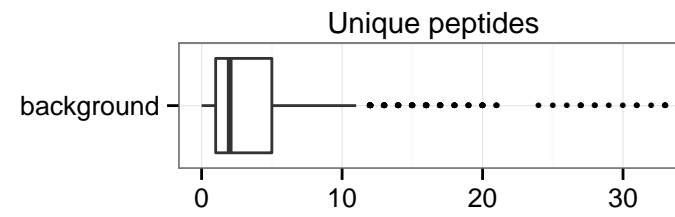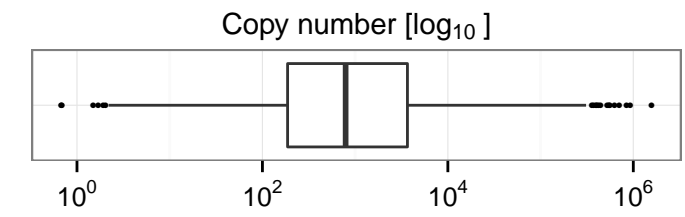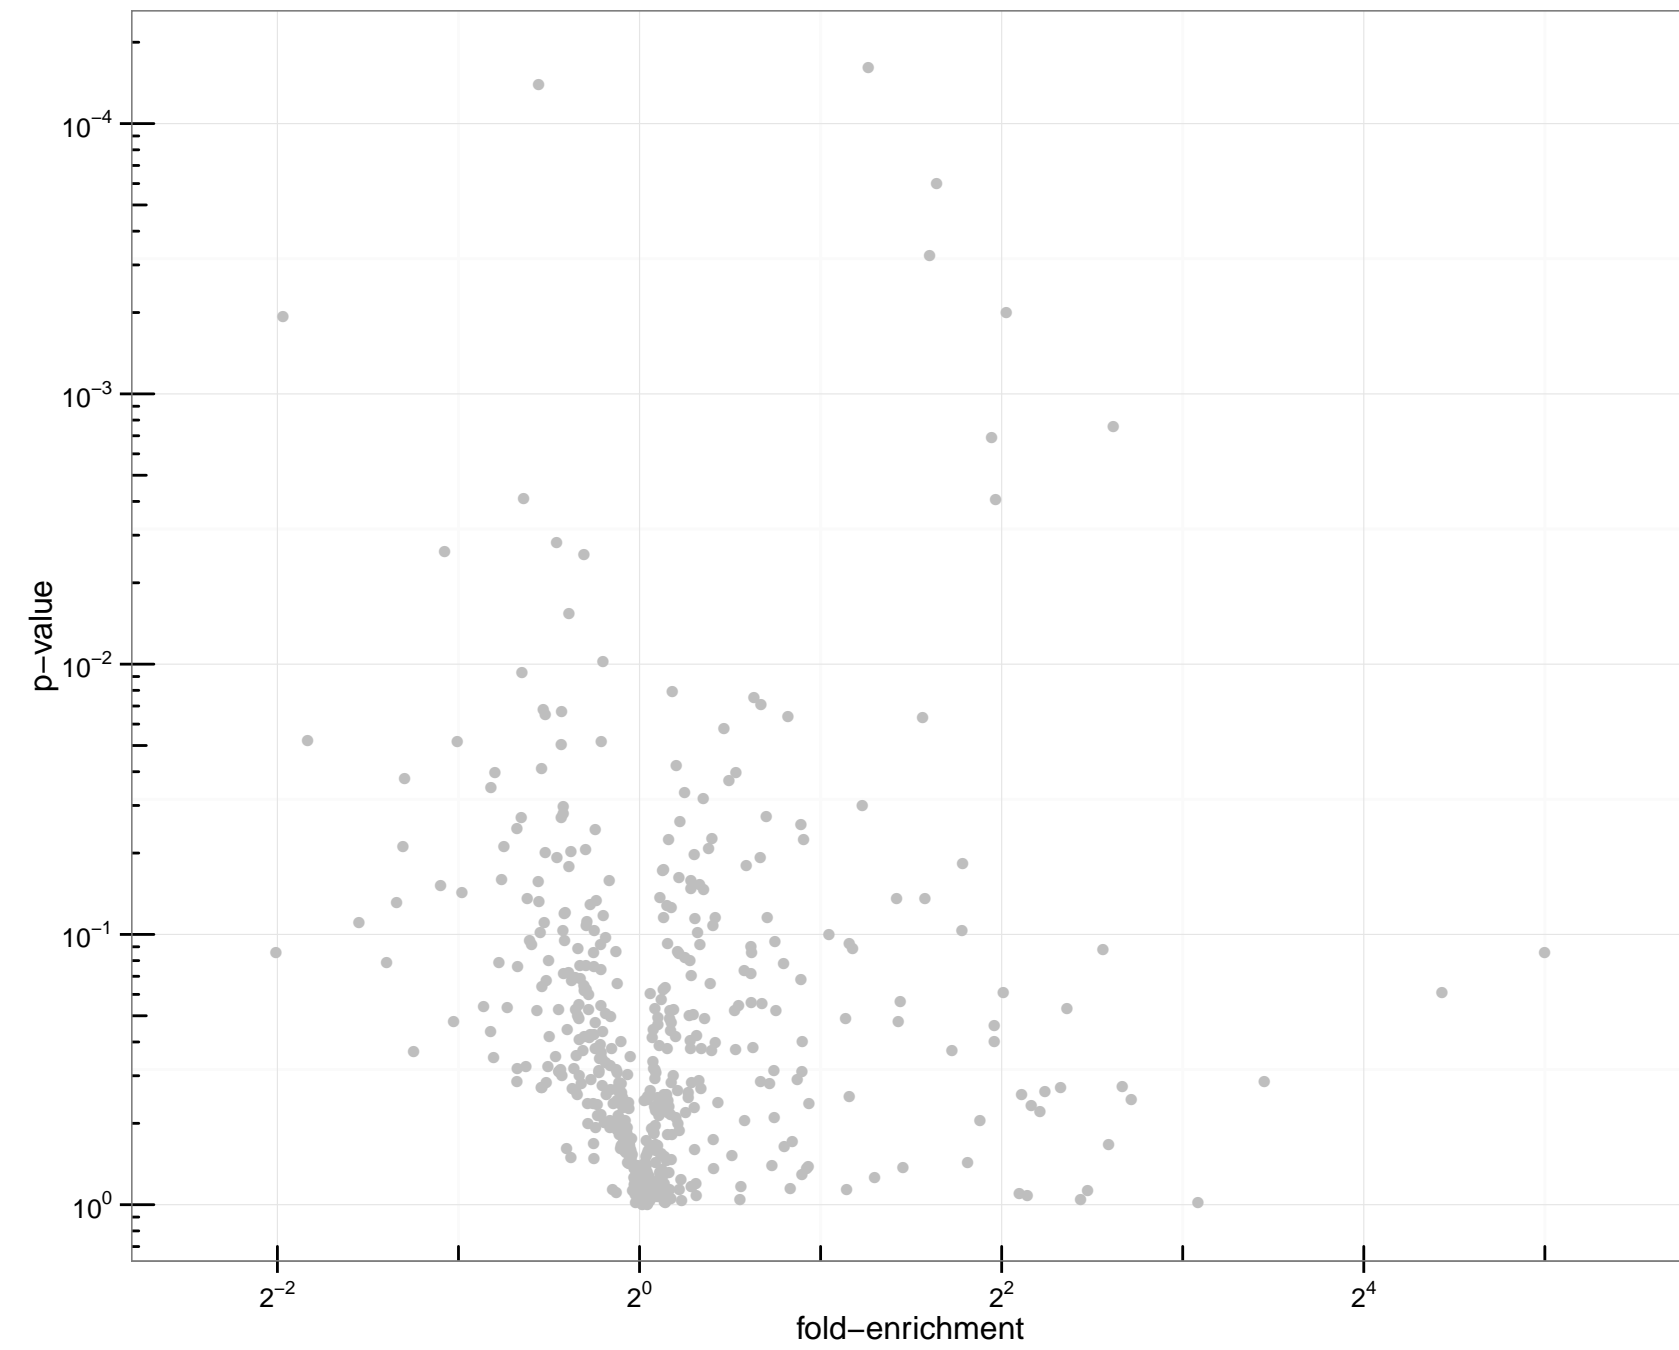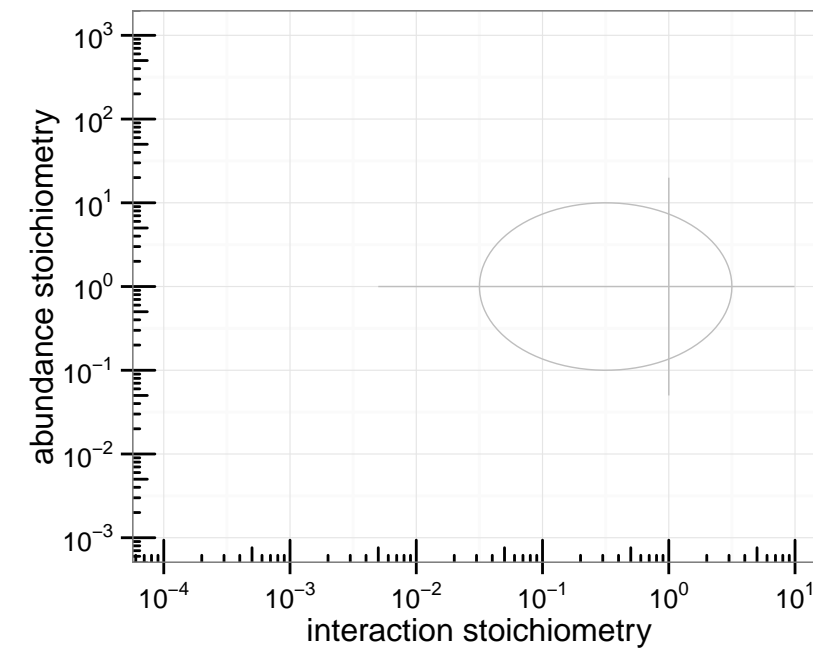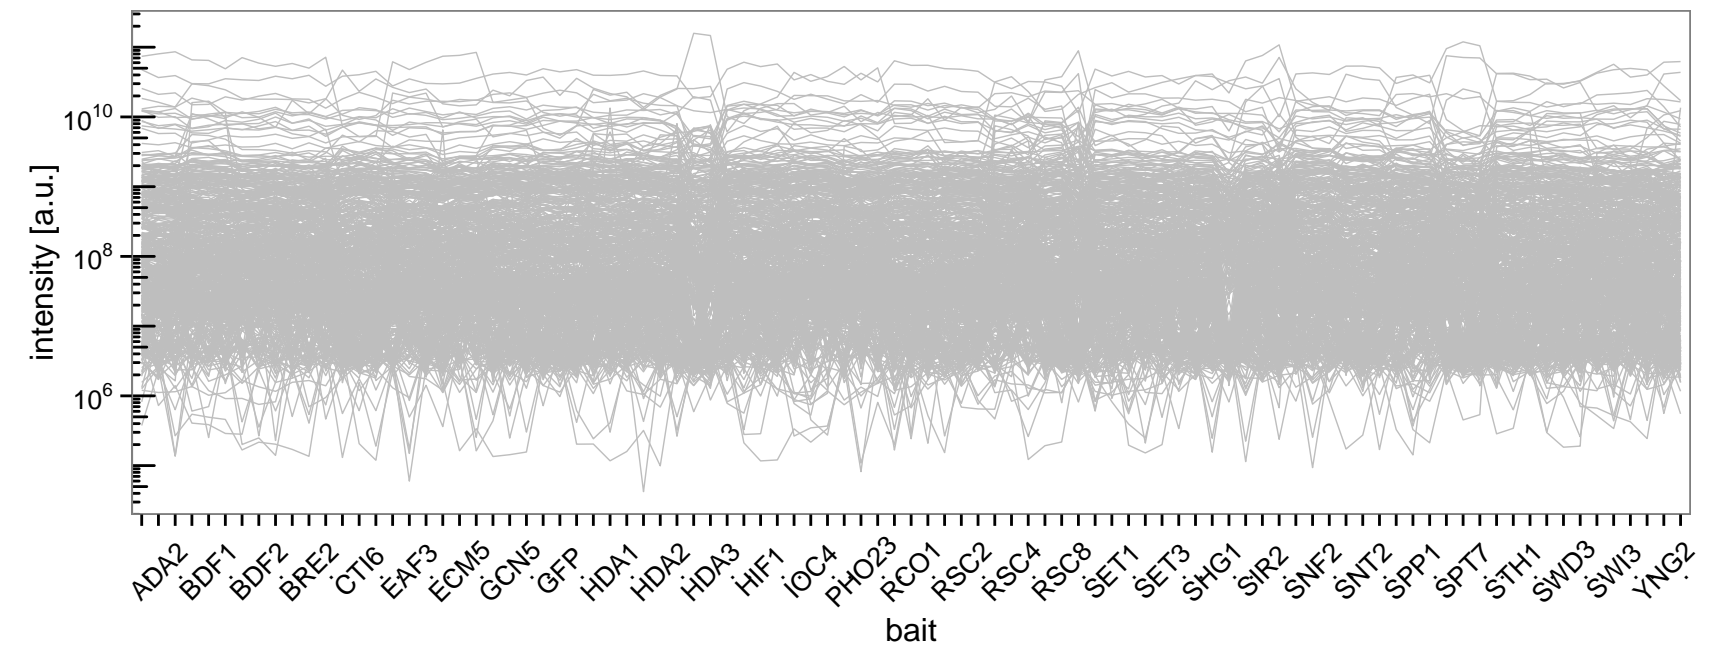

significance  
interactor class



|                   |            |
|-------------------|------------|
| <b>bait</b>       | PHO23      |
| <b>experiment</b> | 14 minutes |

|                    |      |
|--------------------|------|
| <b>interactors</b> | 18   |
| <b>recovery</b>    | 38 % |

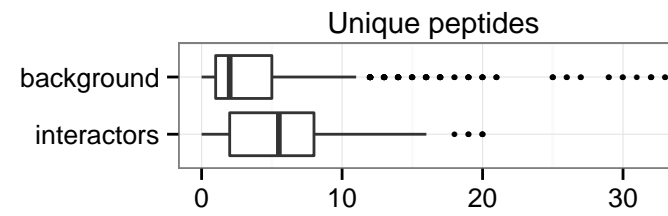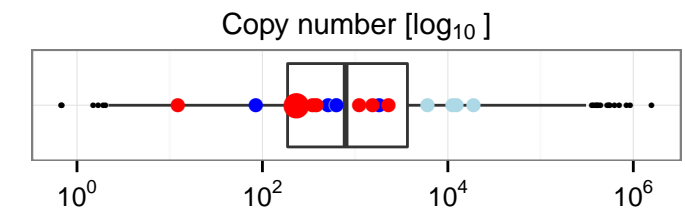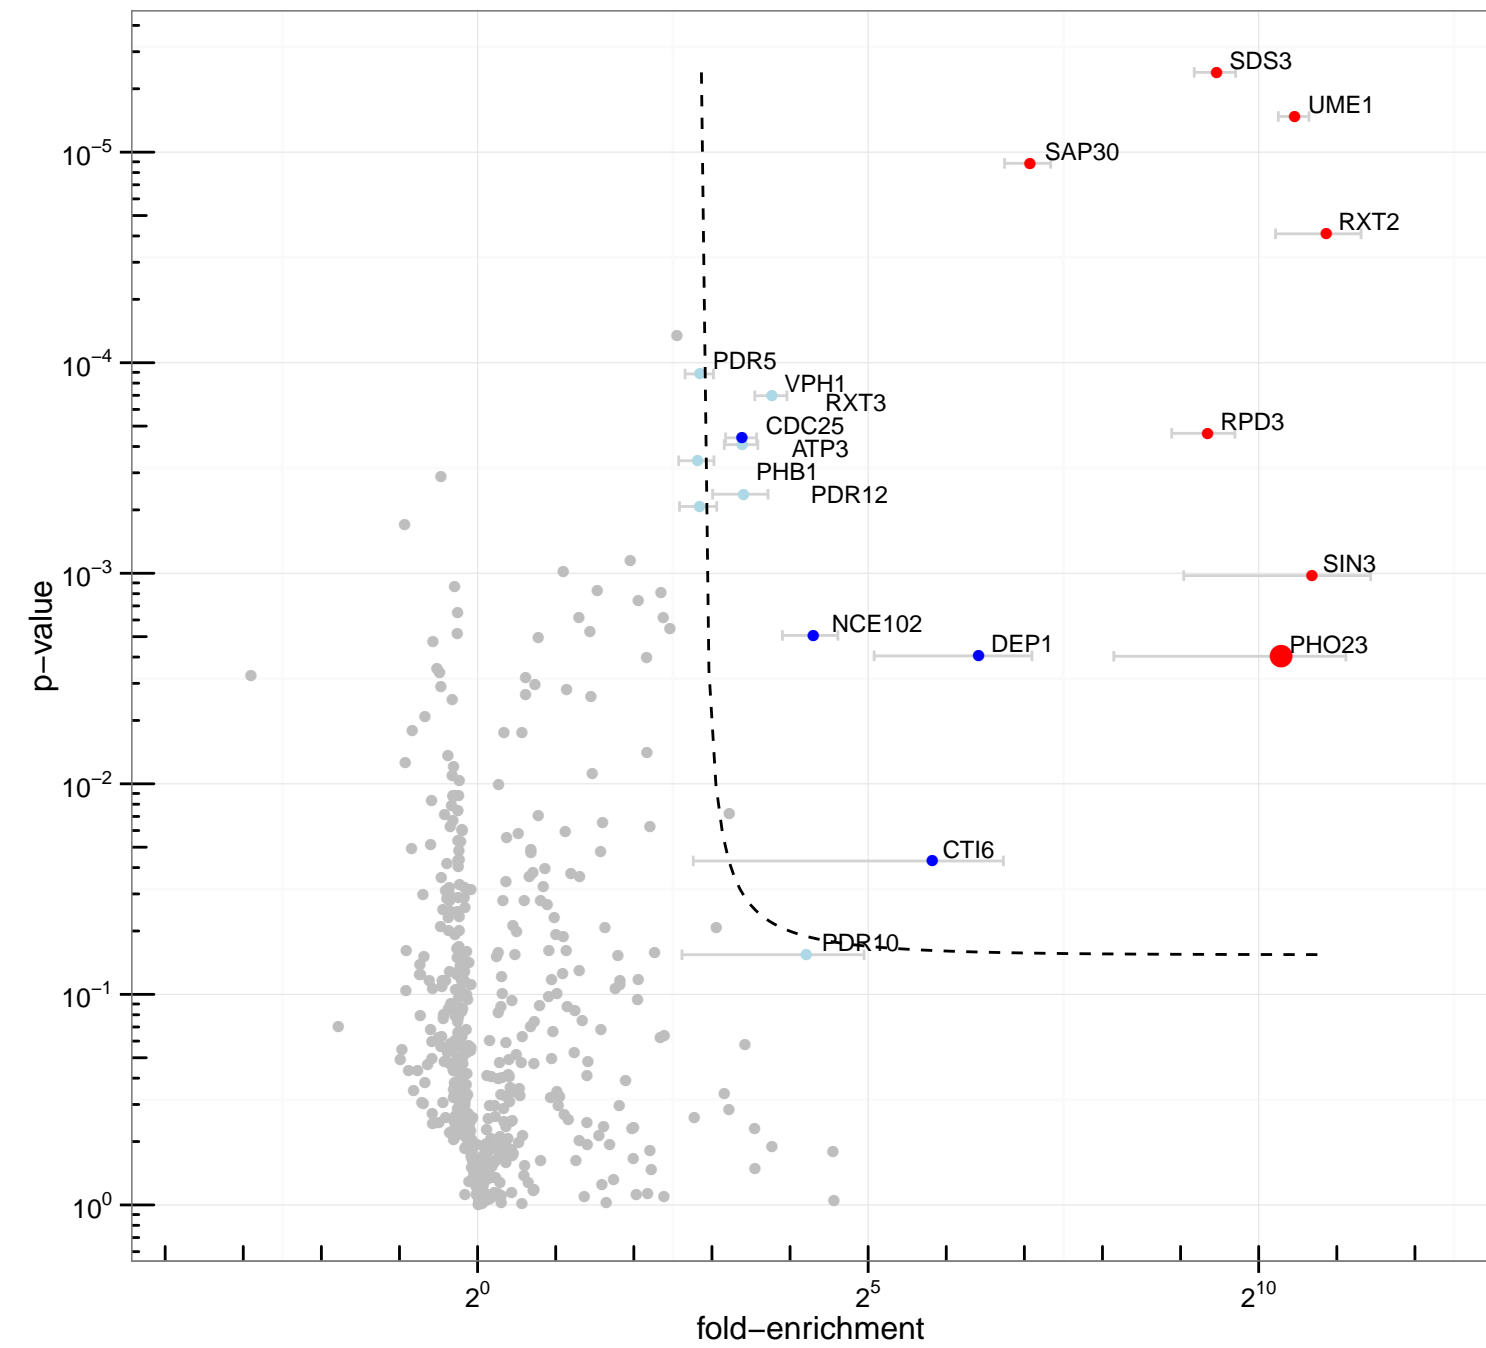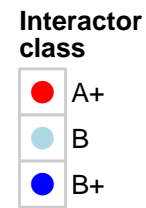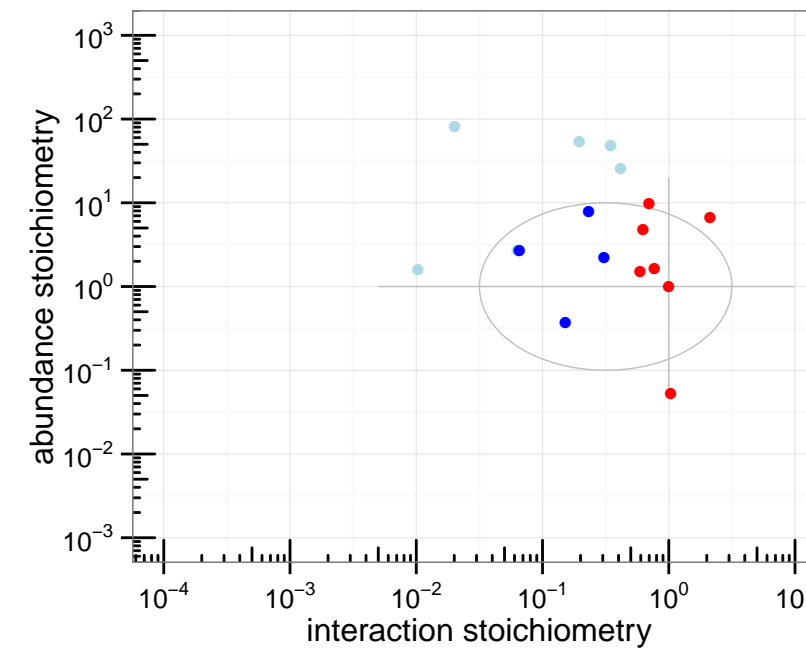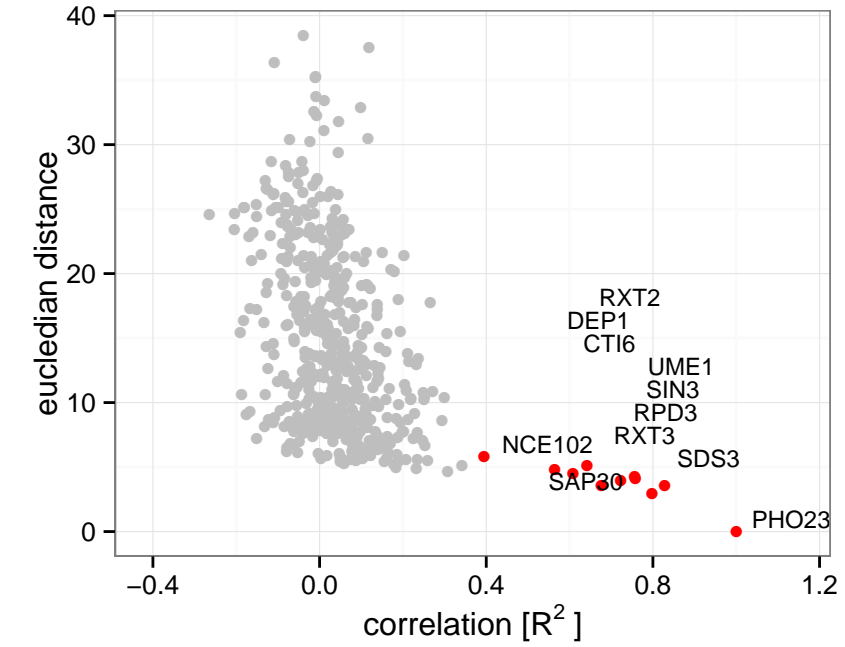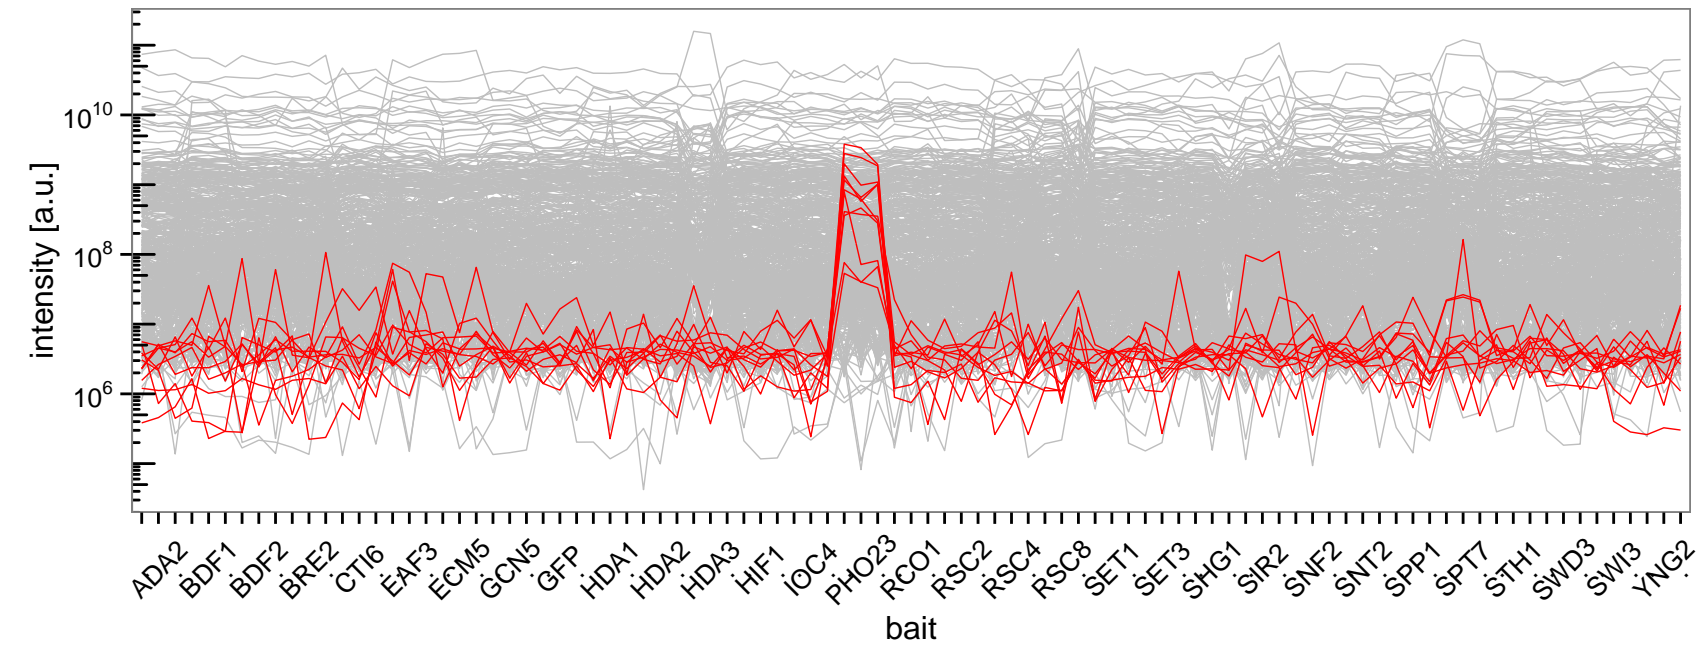

|                         | CTI6 | DEP1 | NCE102 | PHO23 | RPD3 | RXT2 | RXT3 | SAP30 | SDS3 | SIN3 | UME1 |
|-------------------------|------|------|--------|-------|------|------|------|-------|------|------|------|
| <i>significance</i>     | 5.1  | 6.0  | 4.3    | 9.6   | 9.1  | 11.0 | 4.4  | 7.8   | 10.0 | 10.0 | 11.0 |
| <i>interactor class</i> | B+   | B+   | B+     | A+    | A+   | A+   | B+   | A+    | A+   | A+   | A+   |

|                   |            |
|-------------------|------------|
| <b>bait</b>       | RCO1       |
| <b>experiment</b> | 14 minutes |

|                    |     |
|--------------------|-----|
| <b>interactors</b> | 0   |
| <b>recovery</b>    | 0 % |

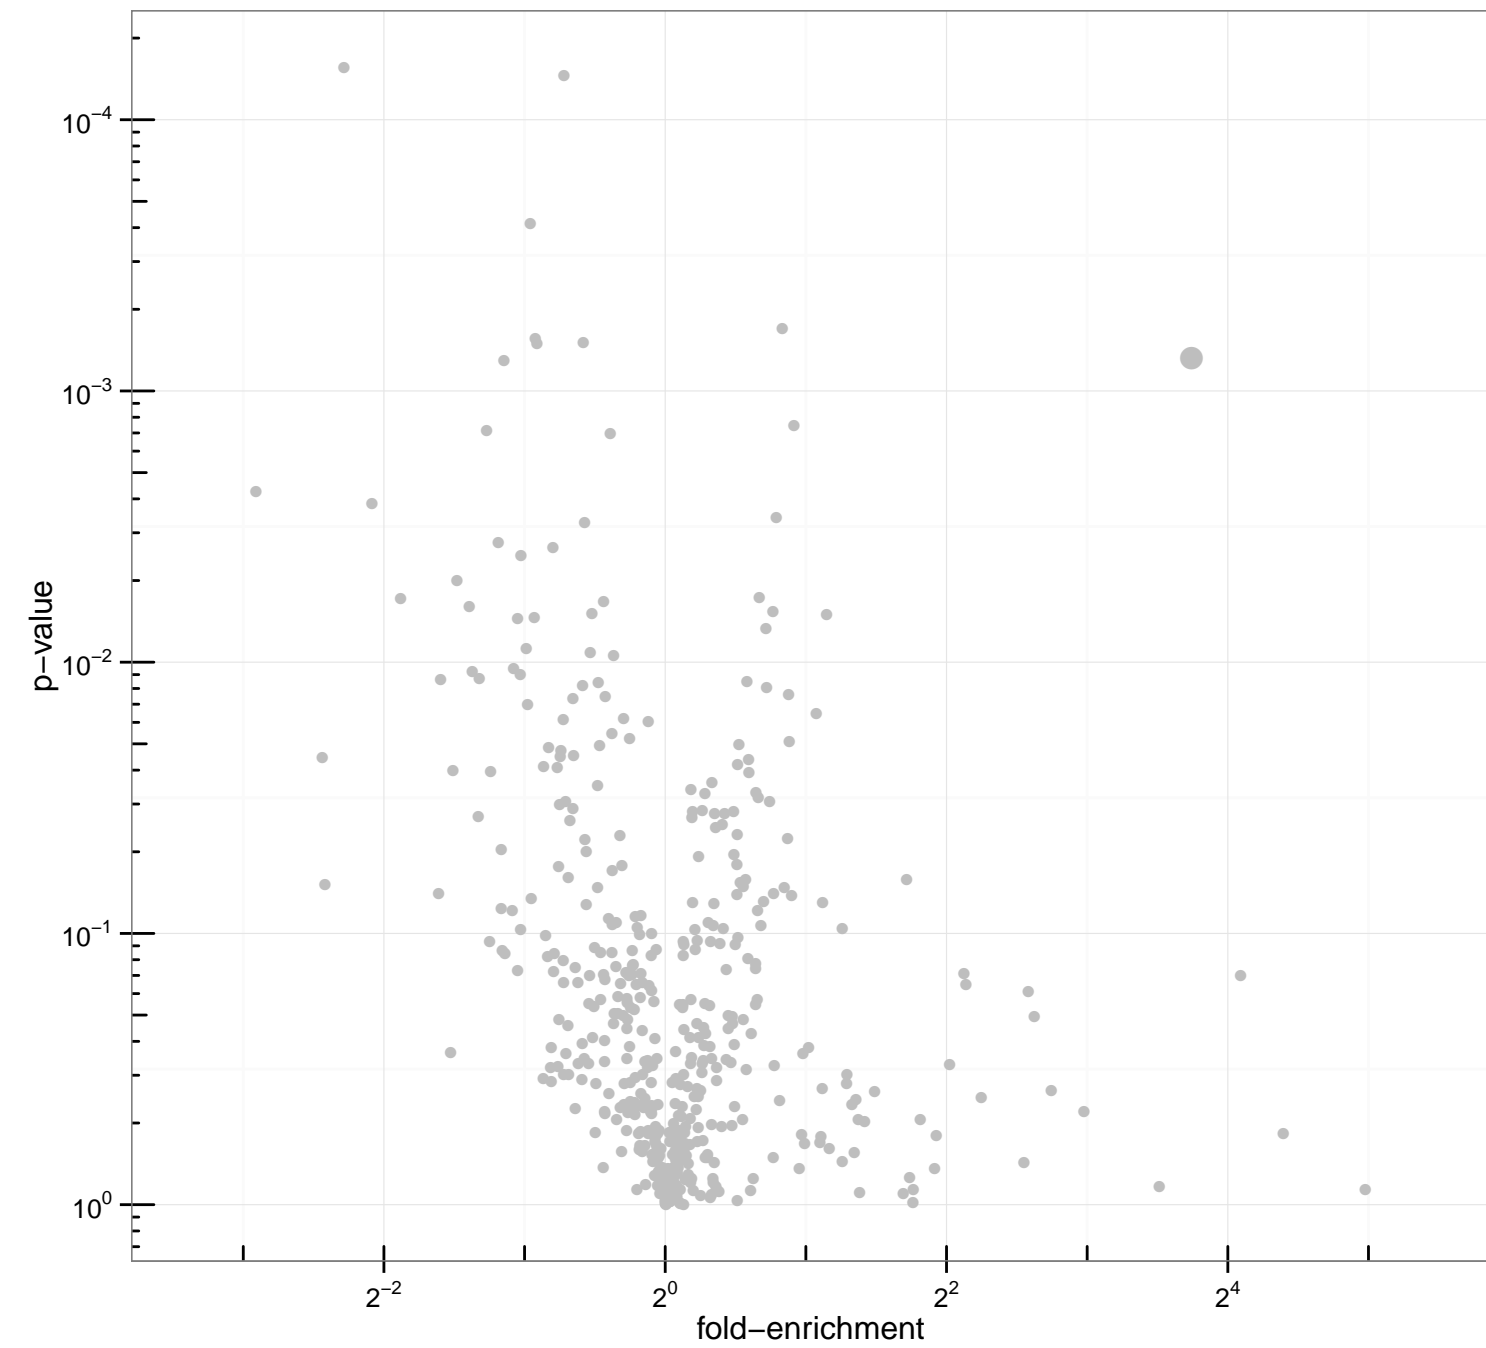

**Interactor class**  
● -

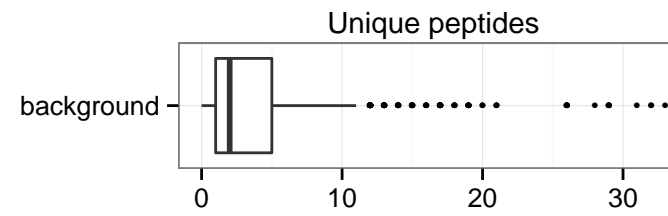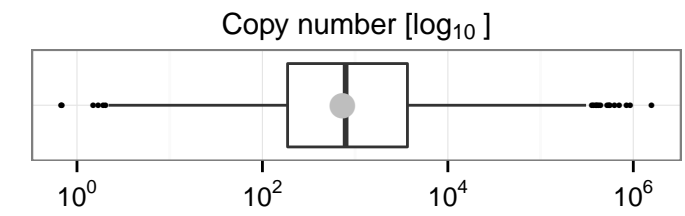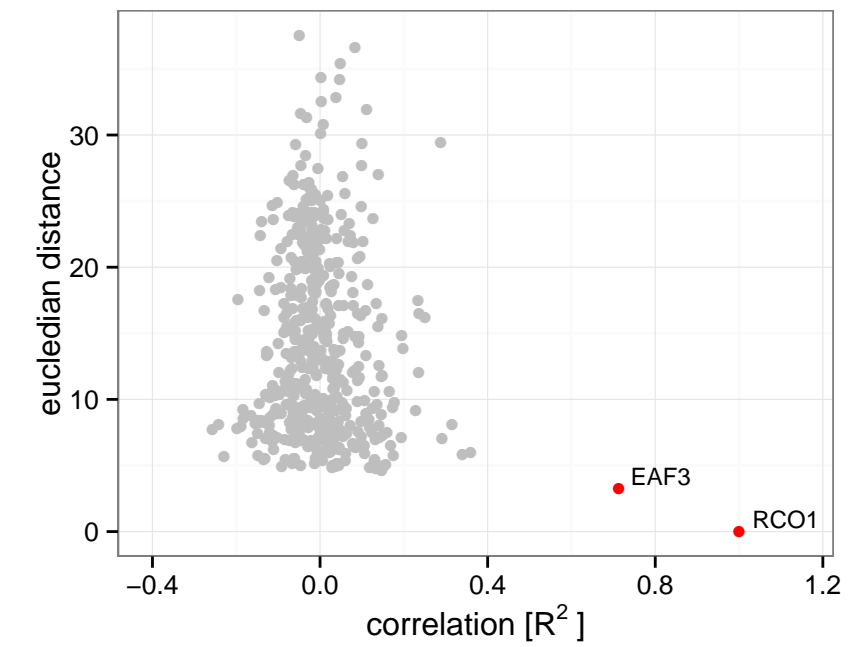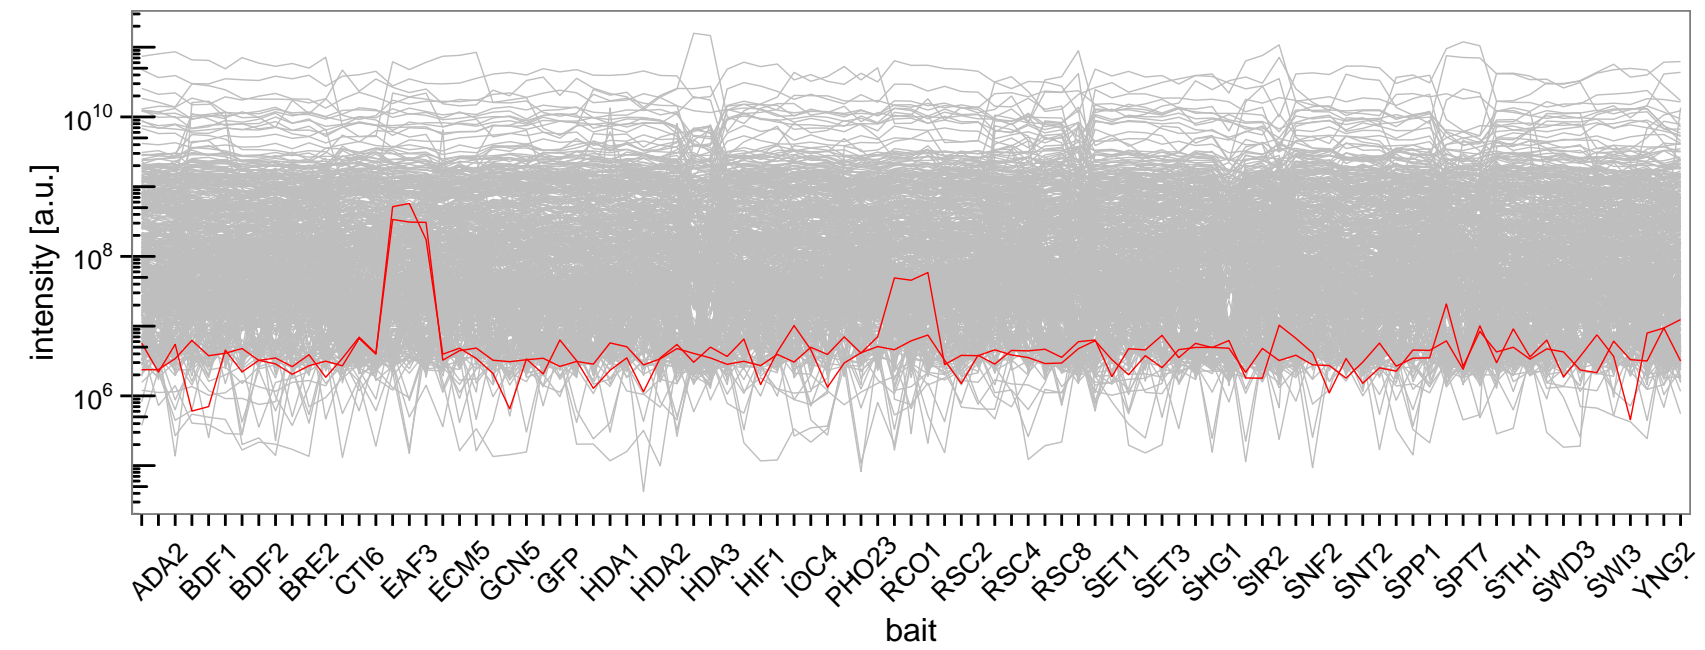

*significance*  
*interactor class*

|                   |            |
|-------------------|------------|
| <b>bait</b>       | RSC2       |
| <b>experiment</b> | 14 minutes |

|                    |     |
|--------------------|-----|
| <b>interactors</b> | 0   |
| <b>recovery</b>    | 0 % |

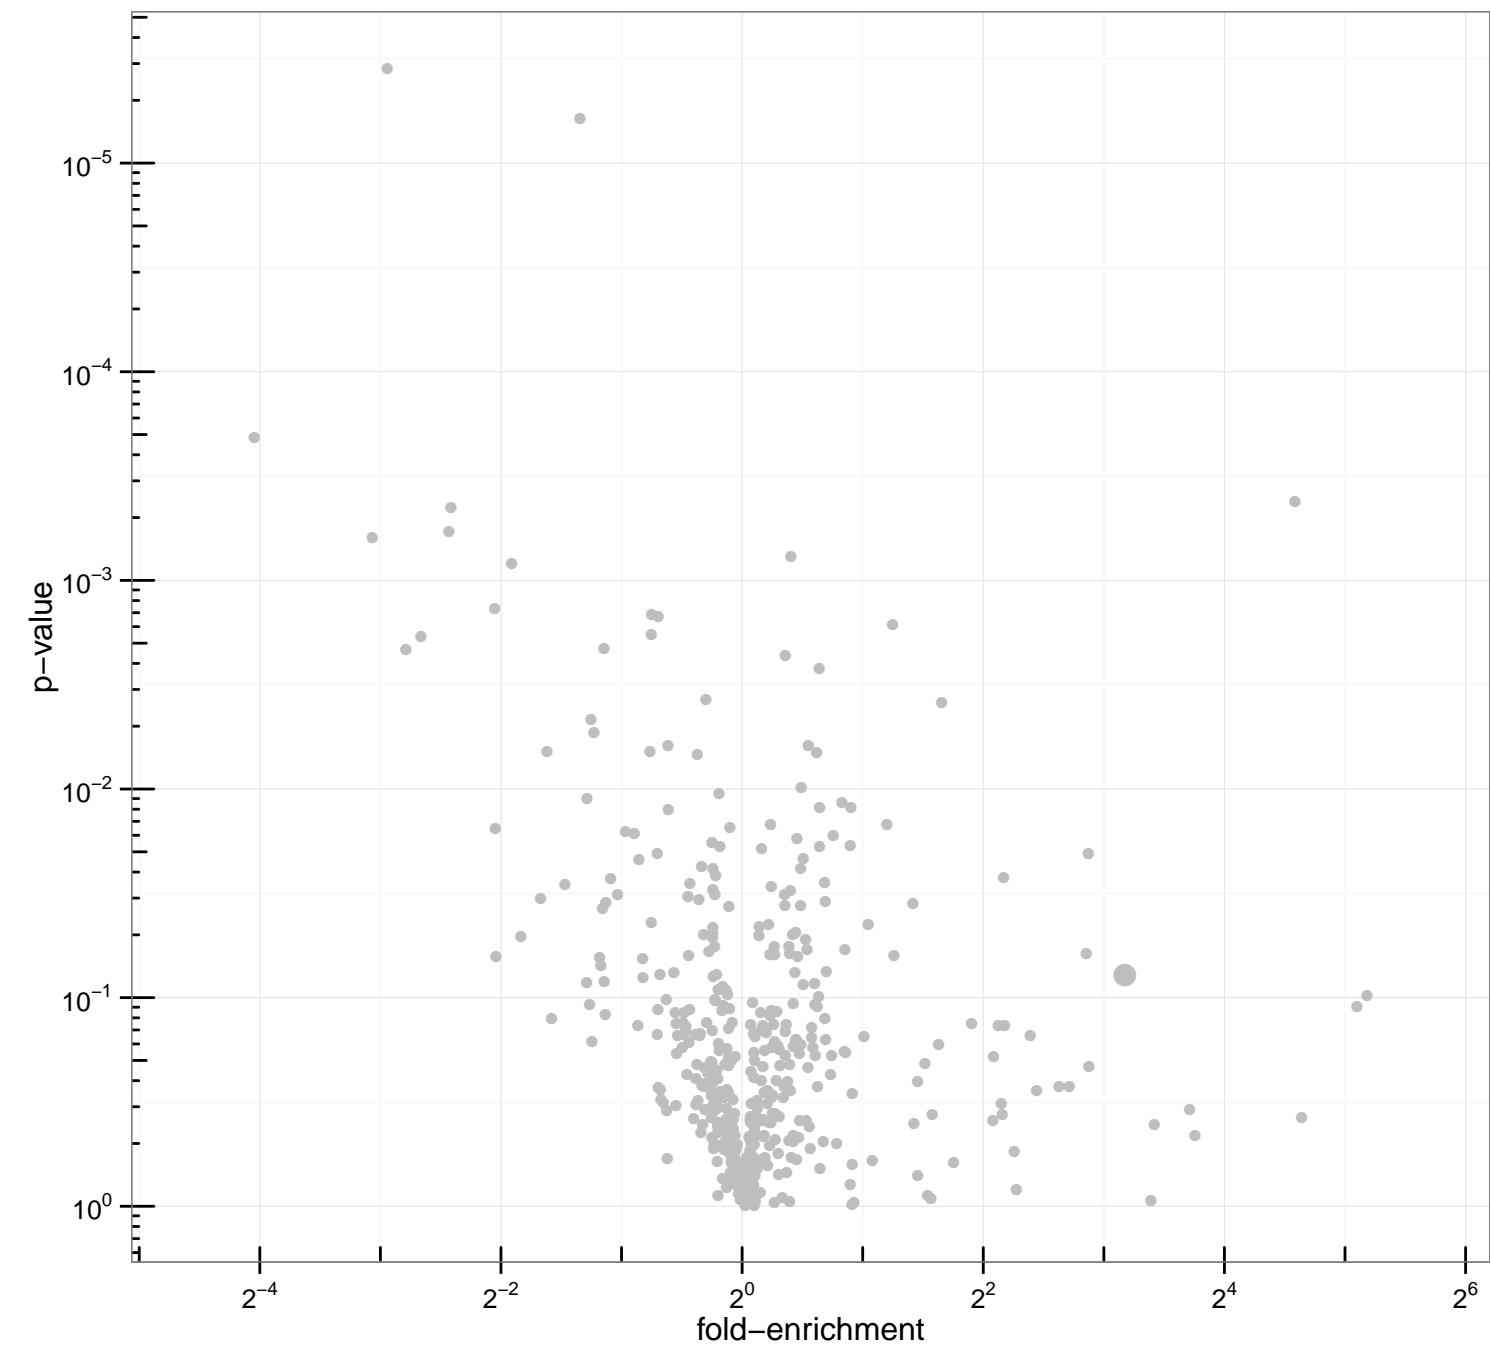

**Interactor class**  
 -

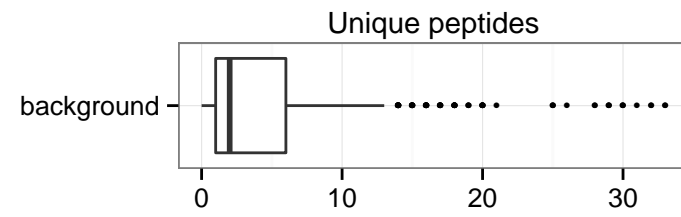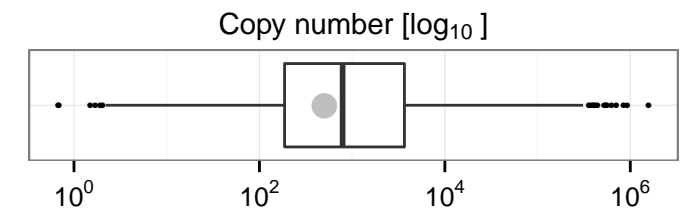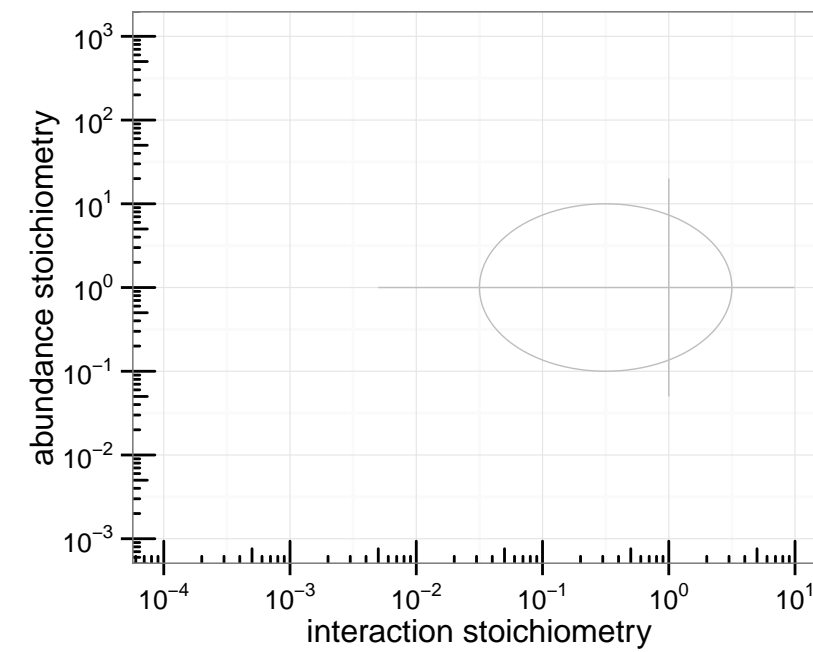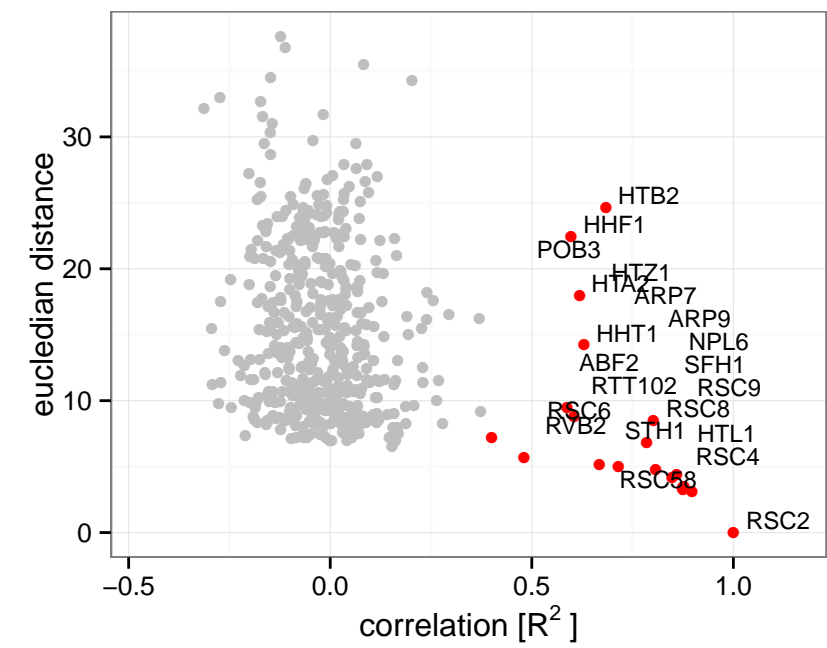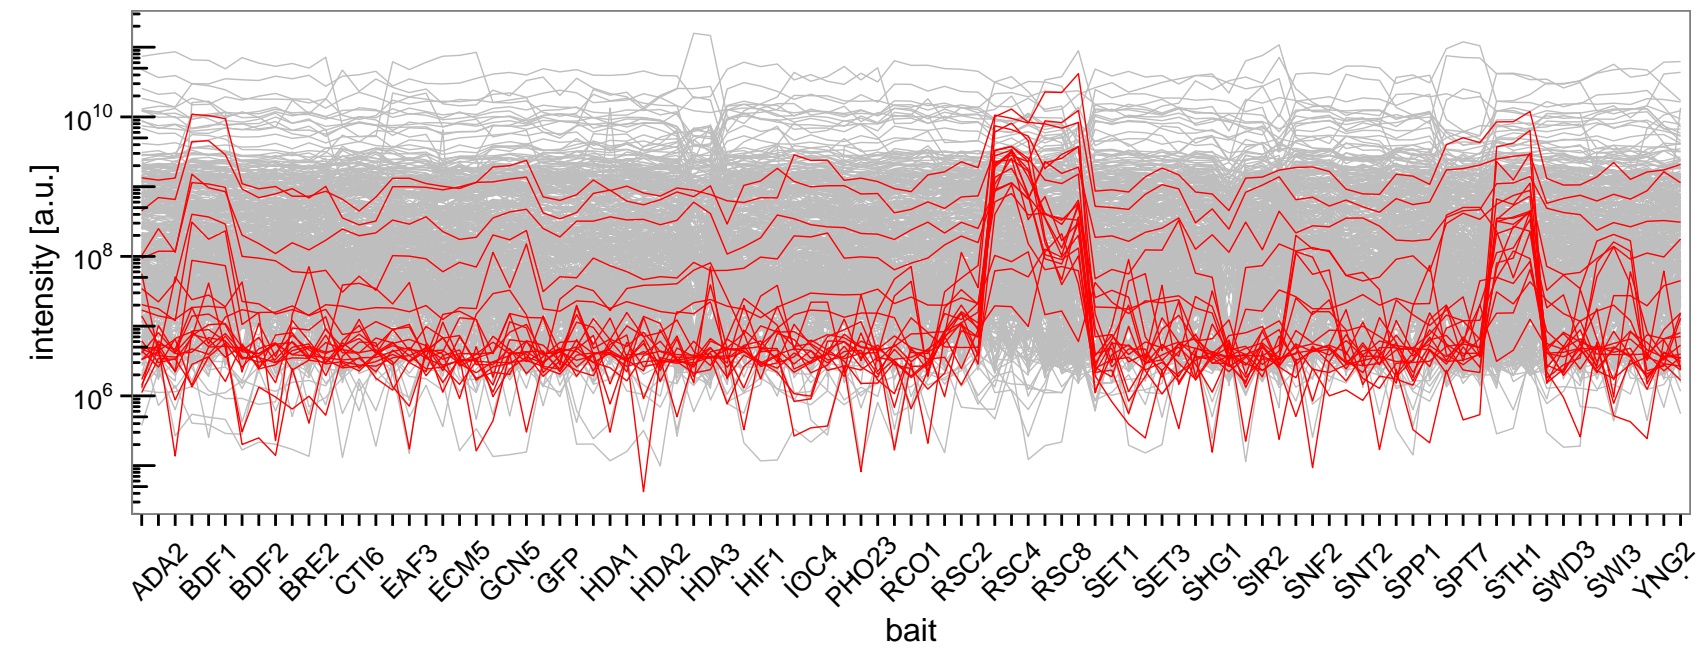

*significance*  
*interactor class*

|                   |            |
|-------------------|------------|
| <b>bait</b>       | RSC4       |
| <b>experiment</b> | 14 minutes |

|                    |      |
|--------------------|------|
| <b>interactors</b> | 33   |
| <b>recovery</b>    | 82 % |

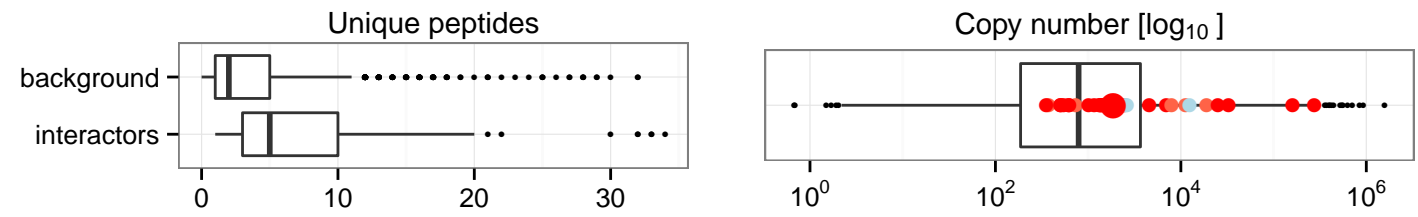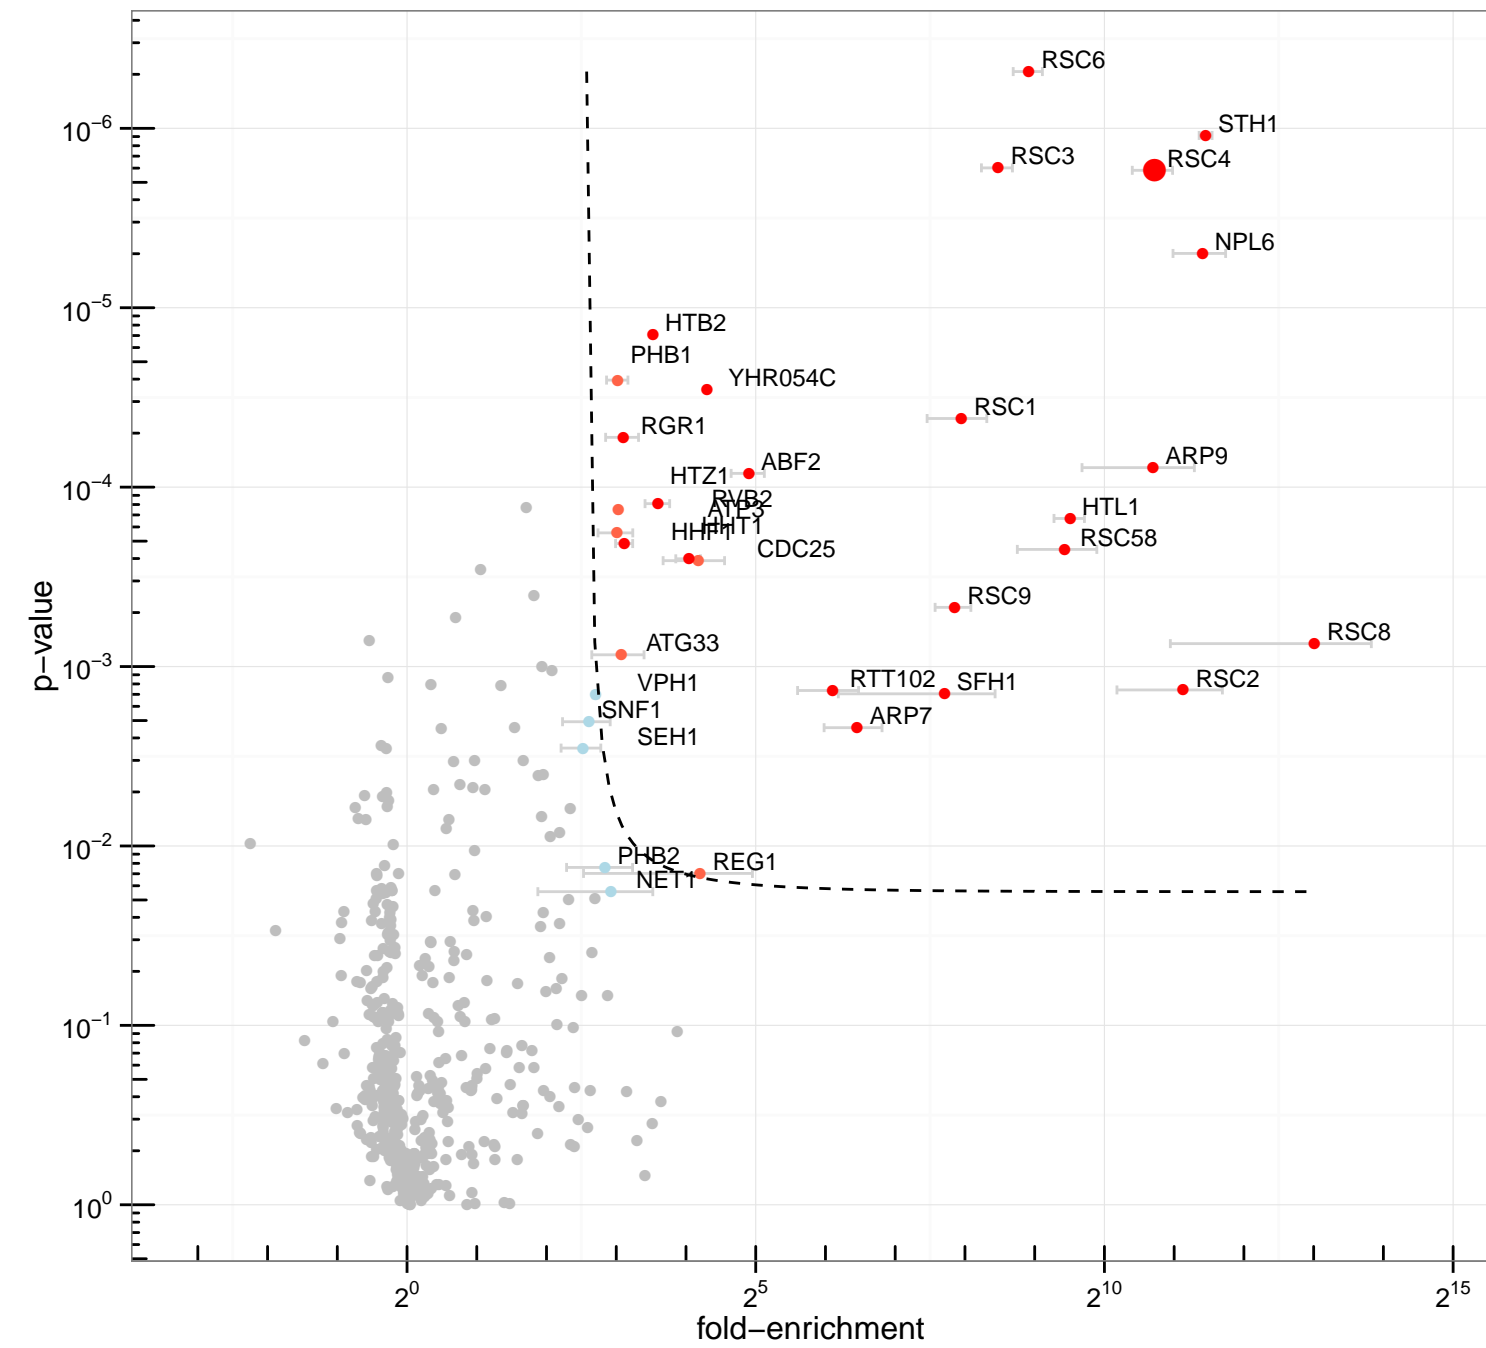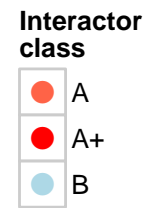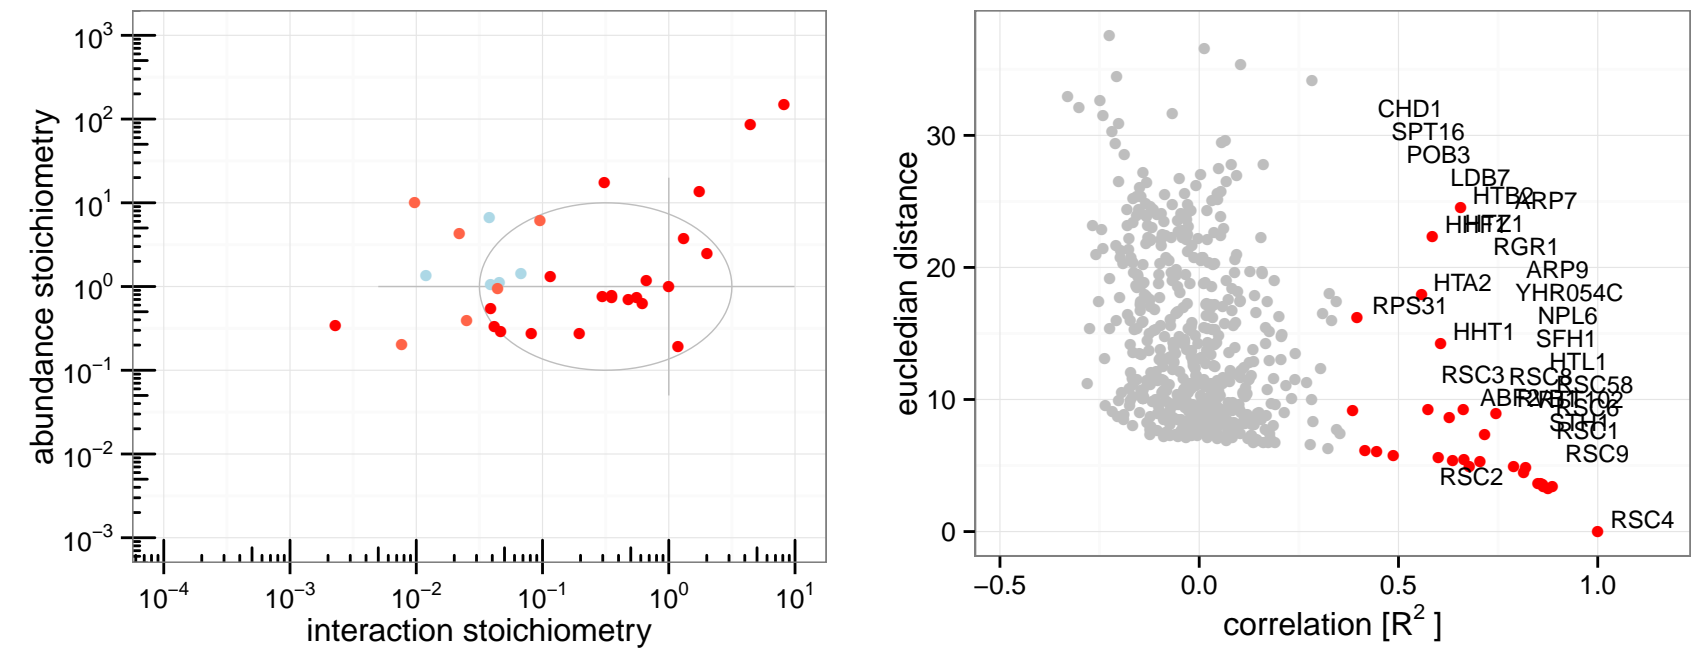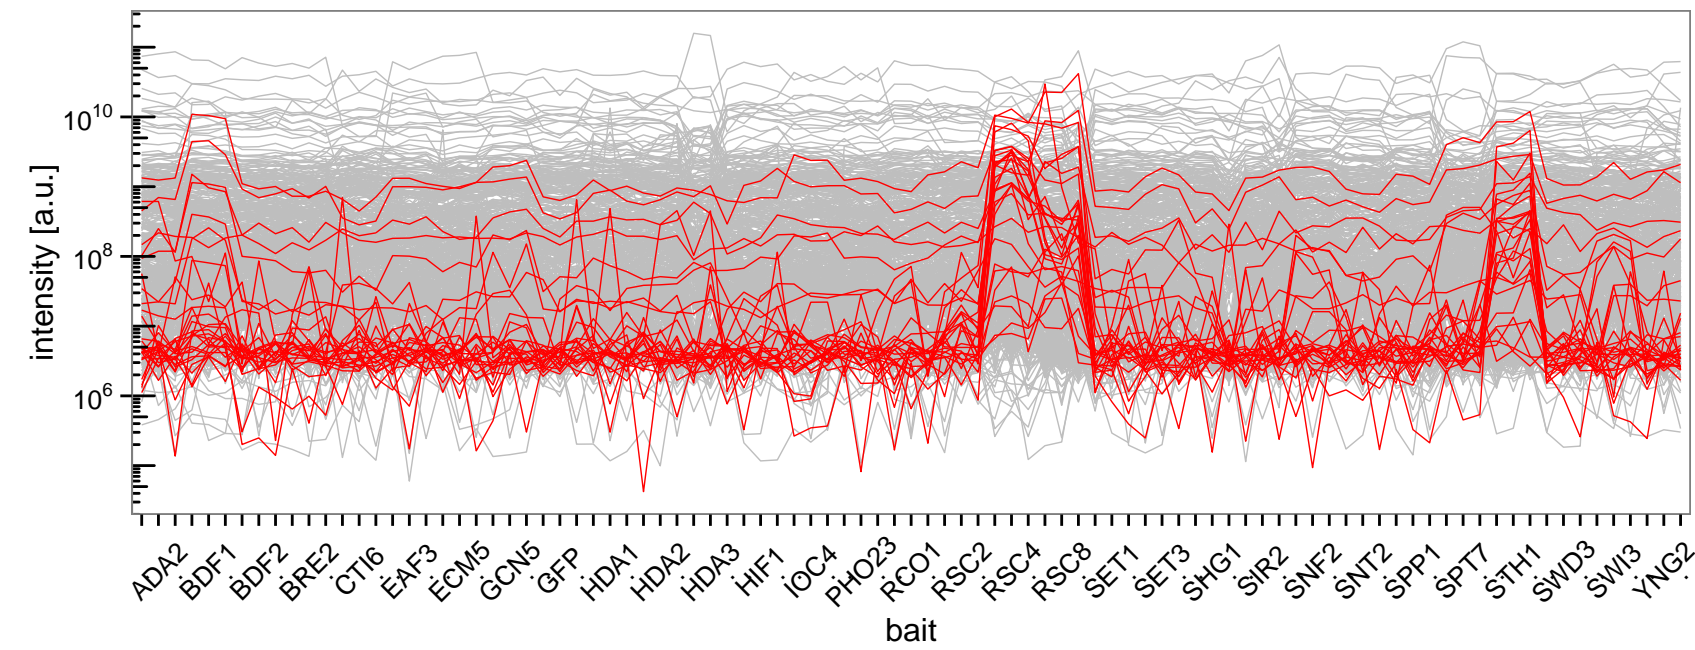

|                         | ABF2 | ARP7 | ARP9 | ATG33 | ATP3 | CDC25 | HHF1 | HHT1 | HTB2 | HTL1 | HTZ1 | NPL6 | PHB1 | REG1 | RGR1 | RSC1 | RSC2 | RSC3 | RSC4 | RSC58 | RSC6 | RSC8 | RSC9 | RTT102 | RVB2 | SFH1 | STH1 | YHR054C |
|-------------------------|------|------|------|-------|------|-------|------|------|------|------|------|------|------|------|------|------|------|------|------|-------|------|------|------|--------|------|------|------|---------|
| <i>significance</i>     | 5.6  | 6.1  | 11.0 | 3.7   | 4.2  | 4.8   | 4.3  | 4.7  | 5.5  | 9.3  | 4.7  | 12.0 | 5.0  | 3.7  | 4.8  | 8.2  | 11.0 | 9.4  | 11.0 | 9.2   | 10.0 | 12.0 | 7.6  | 5.9    | 4.4  | 7.3  | 12.0 | 5.6     |
| <i>interactor class</i> | A+   | A+   | A+   | A     | A    | A     | A+   | A+   | A+   | A+   | A+   | A+   | A    | A    | A+   | A+   | A+   | A+   | A+   | A+    | A+   | A+   | A+   | A+     | A    | A+   | A+   | A+      |

|                   |            |
|-------------------|------------|
| <b>bait</b>       | RSC8       |
| <b>experiment</b> | 14 minutes |

|                    |      |
|--------------------|------|
| <b>interactors</b> | 25   |
| <b>recovery</b>    | 82 % |

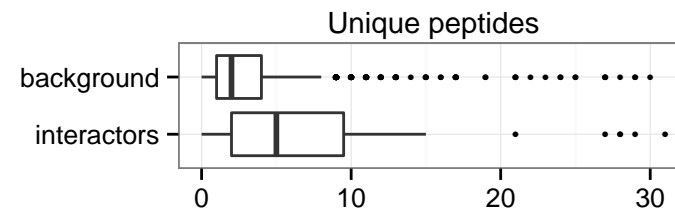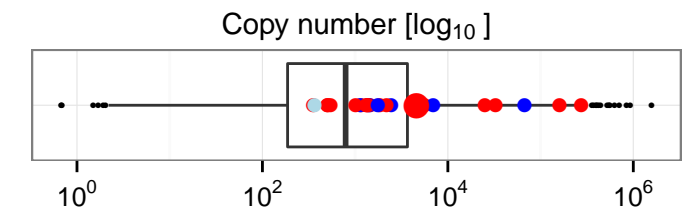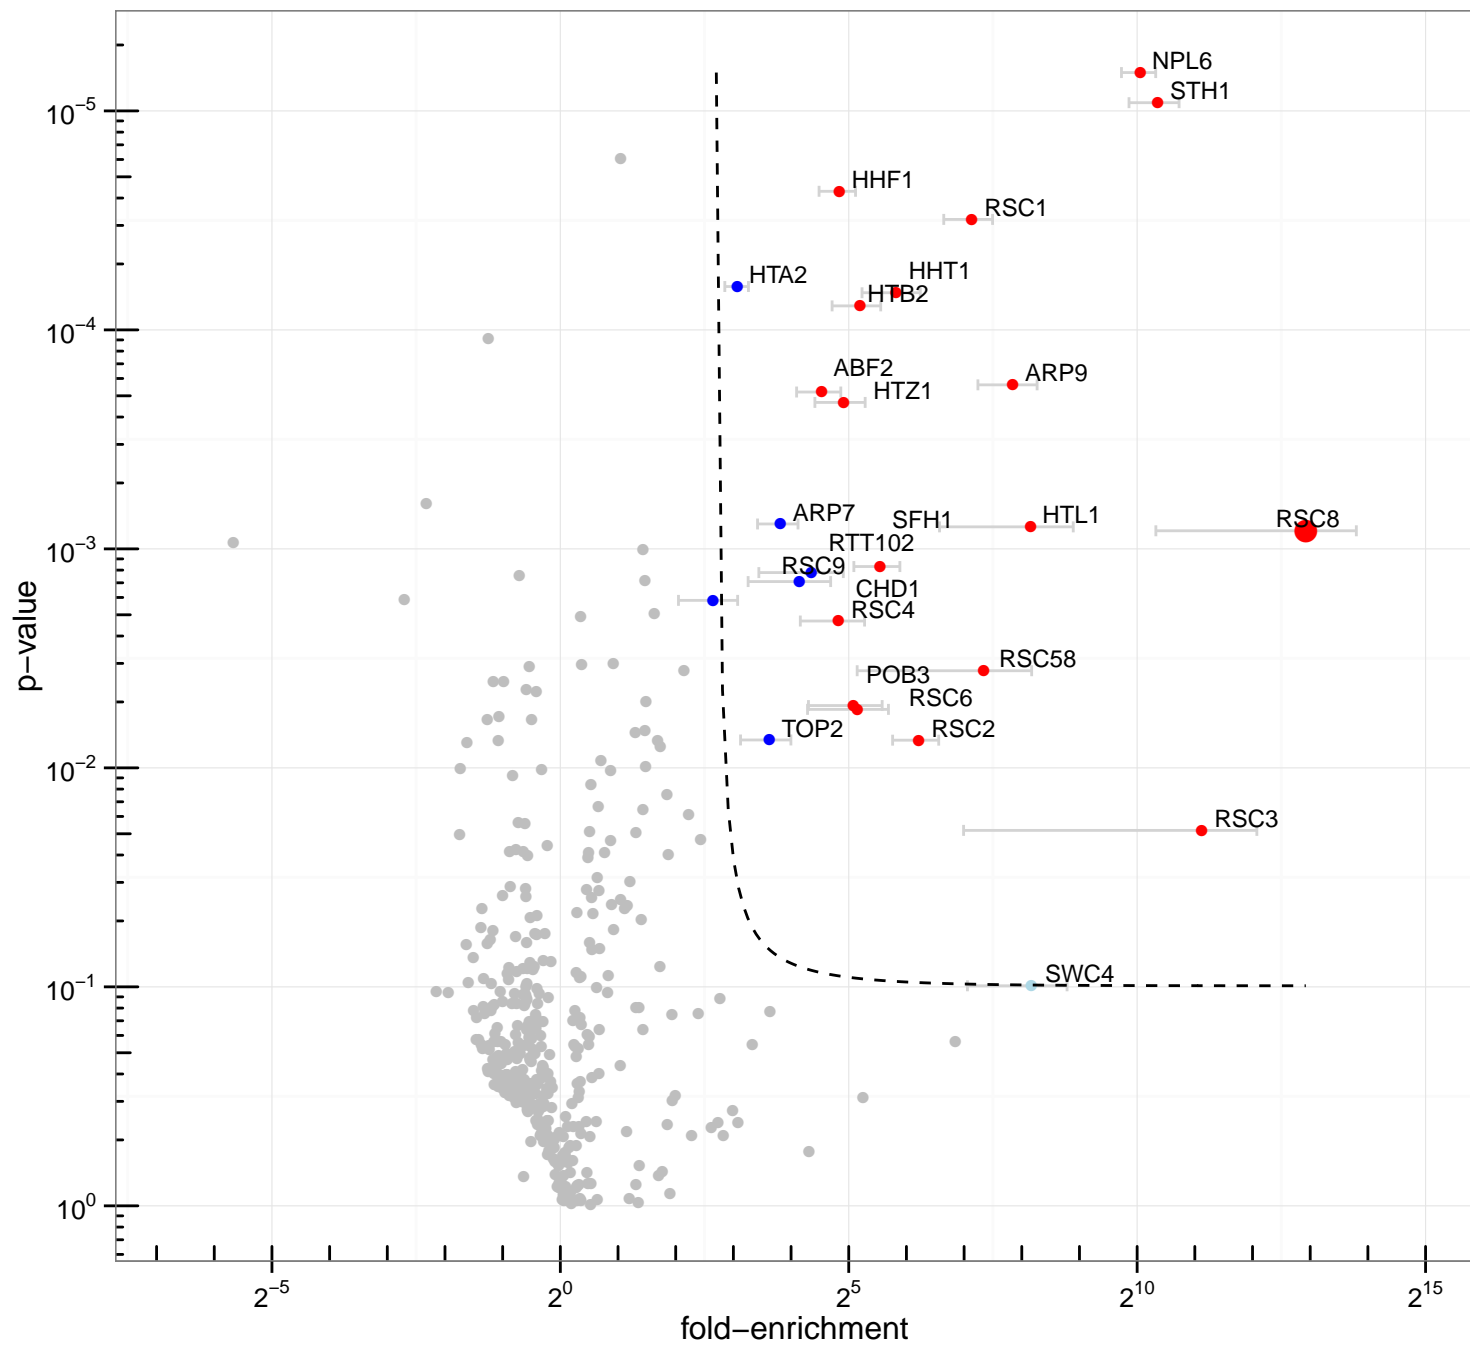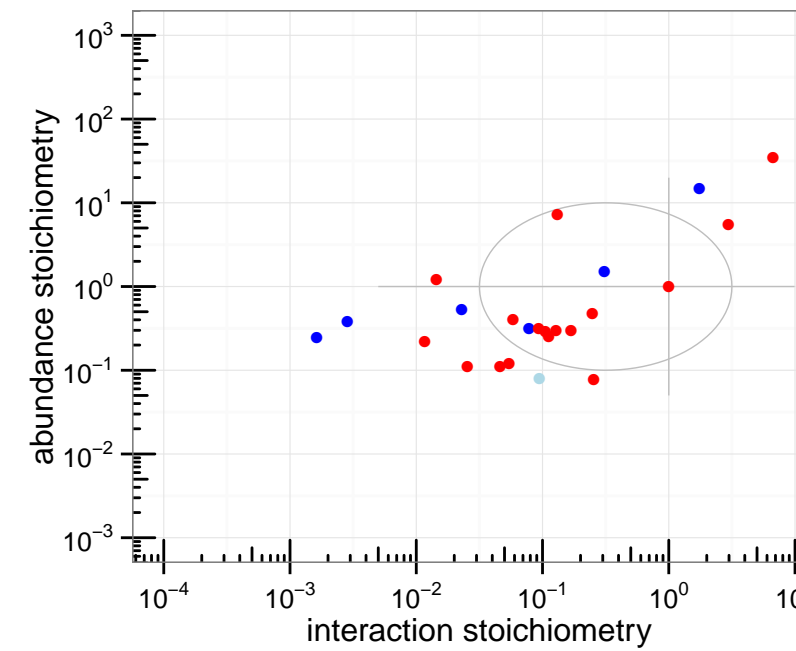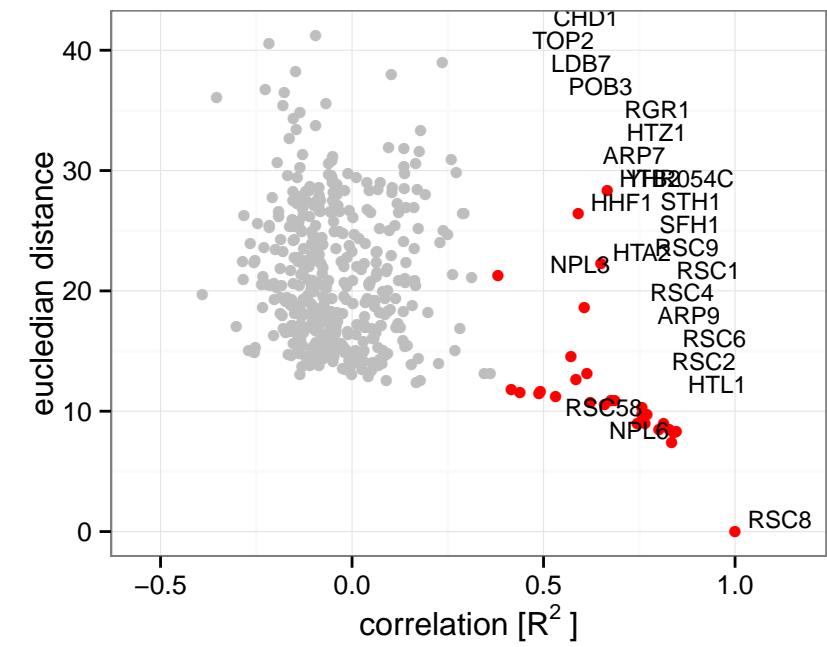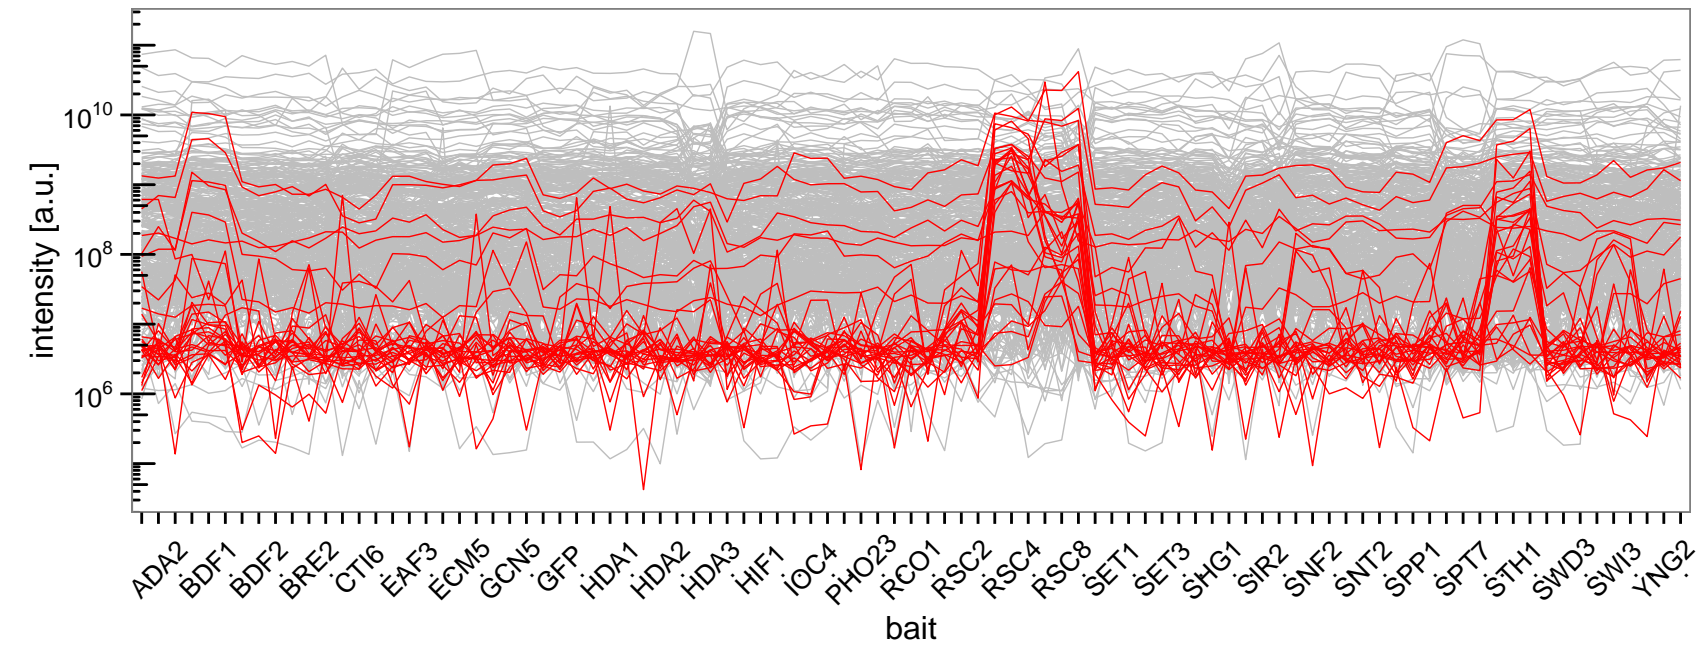

|                         | ABF2 | ARP7 | ARP9 | CHD1 | HHF1 | HHT1 | HTA2 | HTB2 | HTL1 | HTZ1 | NPL6 | POB3 | RSC1 | RSC2 | RSC3 | RSC4 | RSC58 | RSC6 | RSC8 | RSC9 | RTT102 | SFH1 | STH1 | TOP2 |
|-------------------------|------|------|------|------|------|------|------|------|------|------|------|------|------|------|------|------|-------|------|------|------|--------|------|------|------|
| <i>significance</i>     | 5.1  | 4.2  | 7.8  | 3.2  | 6.0  | 6.4  | 4.7  | 5.9  | 7.8  | 5.4  | 10.0 | 4.7  | 7.6  | 5.6  | 10.0 | 4.7  | 6.8   | 4.7  | 12.0 | 4.2  | 4.4    | 5.4  | 11.0 | 3.4  |
| <i>interactor class</i> | A+   | B+   | A+   | B+   | A+   | A+   | B+   | A+   | A+   | A+   | A+   | A+   | A+   | A+   | A+   | A+   | A+    | A+   | A+   | B+   | B+     | A+   | A+   | B+   |



|                   |            |
|-------------------|------------|
| <b>bait</b>       | SET3       |
| <b>experiment</b> | 14 minutes |

|                    |      |
|--------------------|------|
| <b>interactors</b> | 4    |
| <b>recovery</b>    | 18 % |

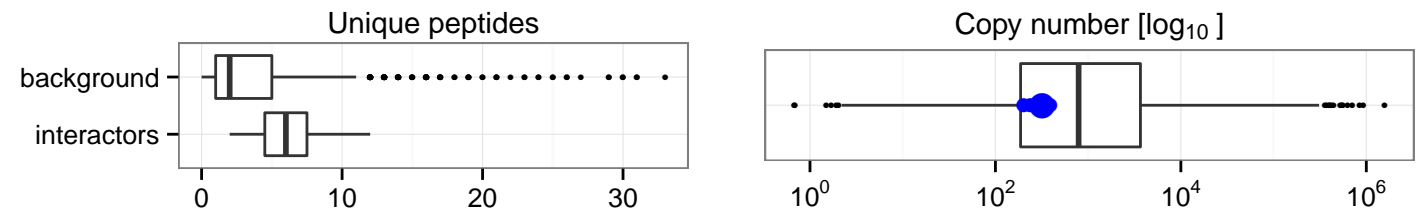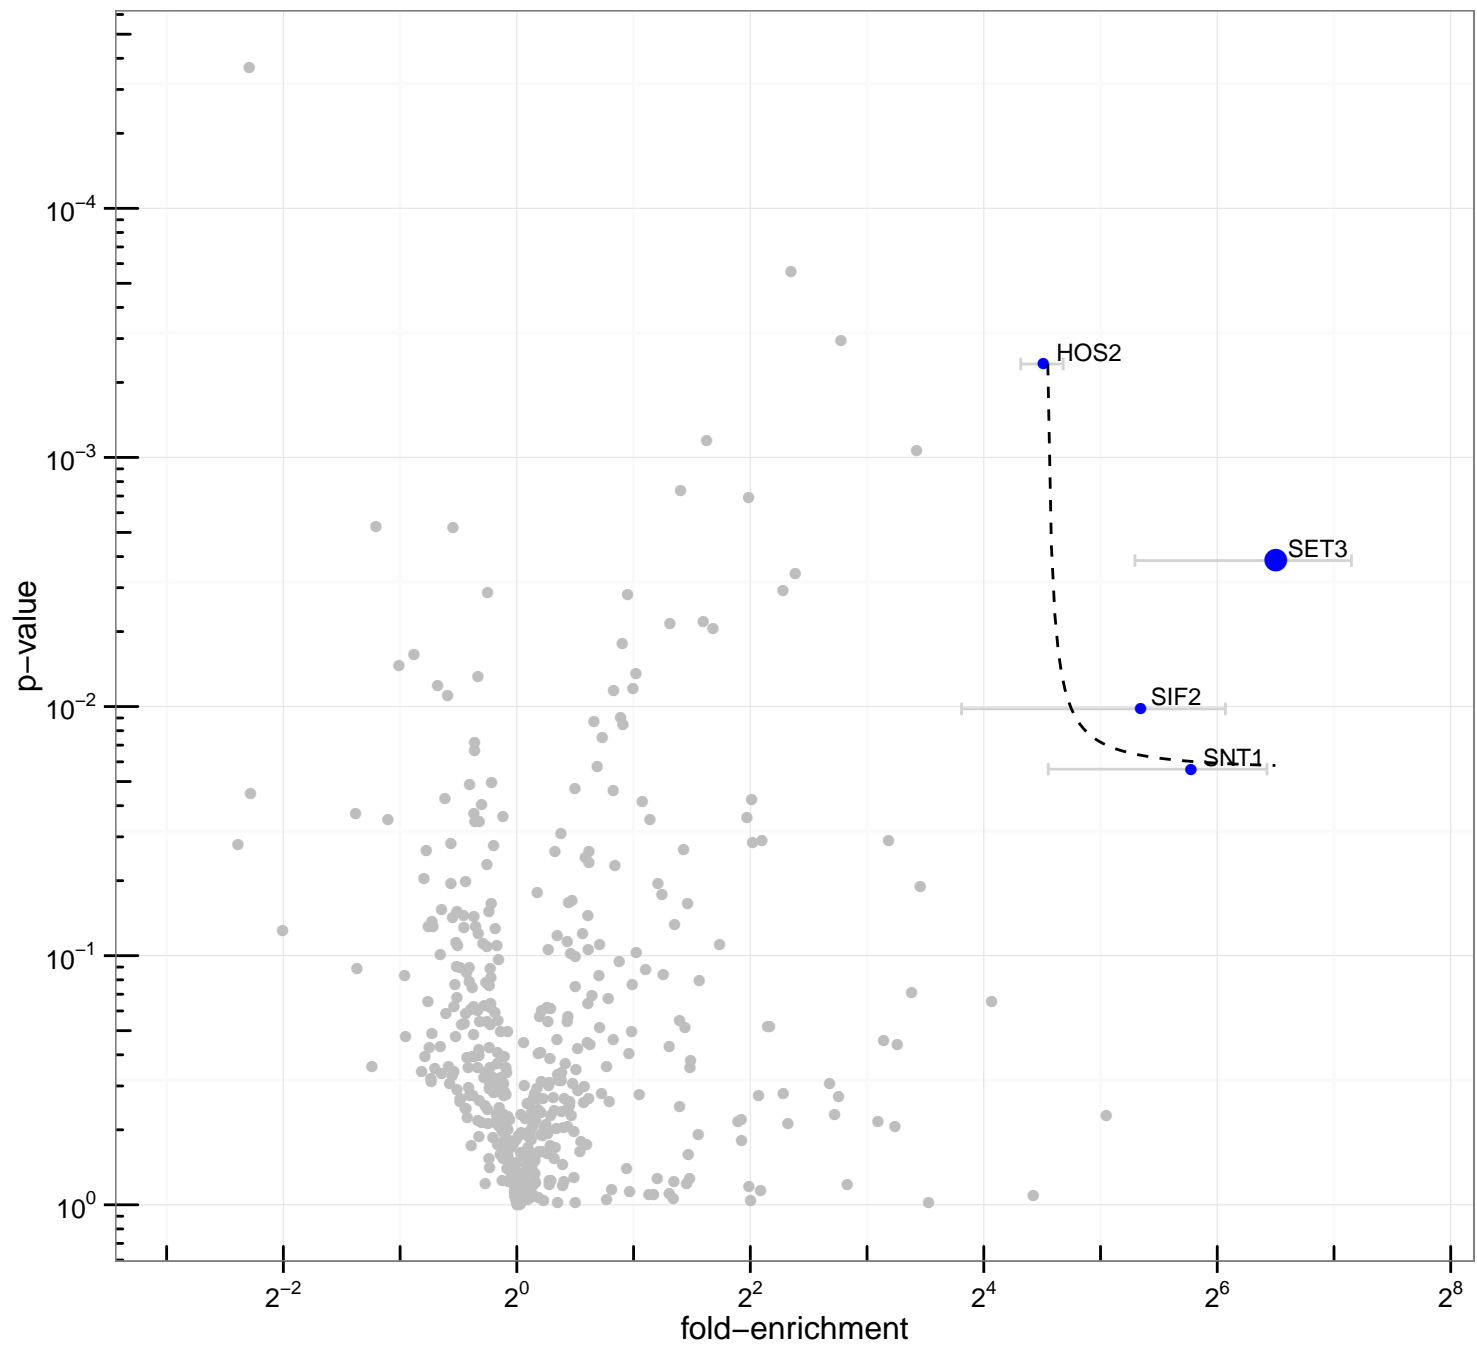

**Interactor class**  
● B+

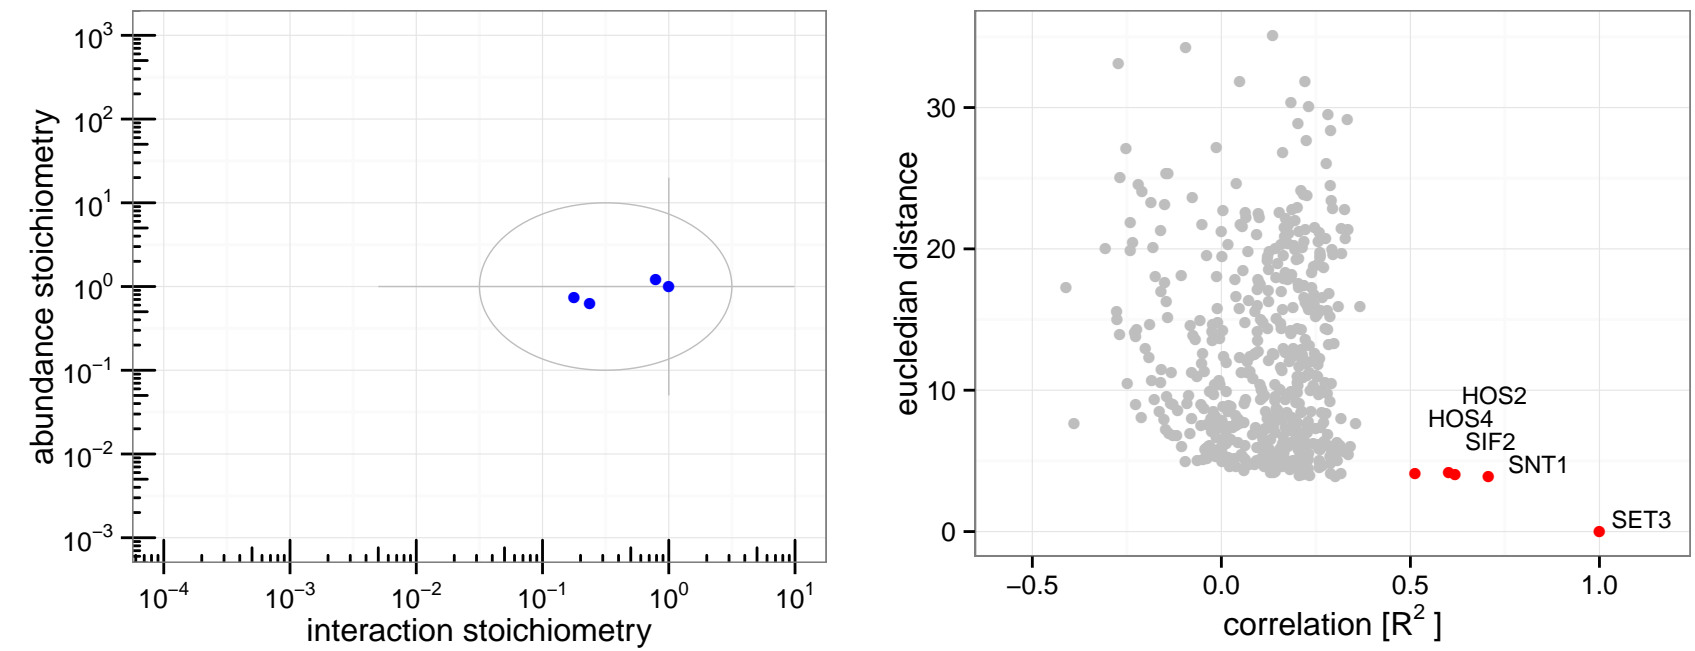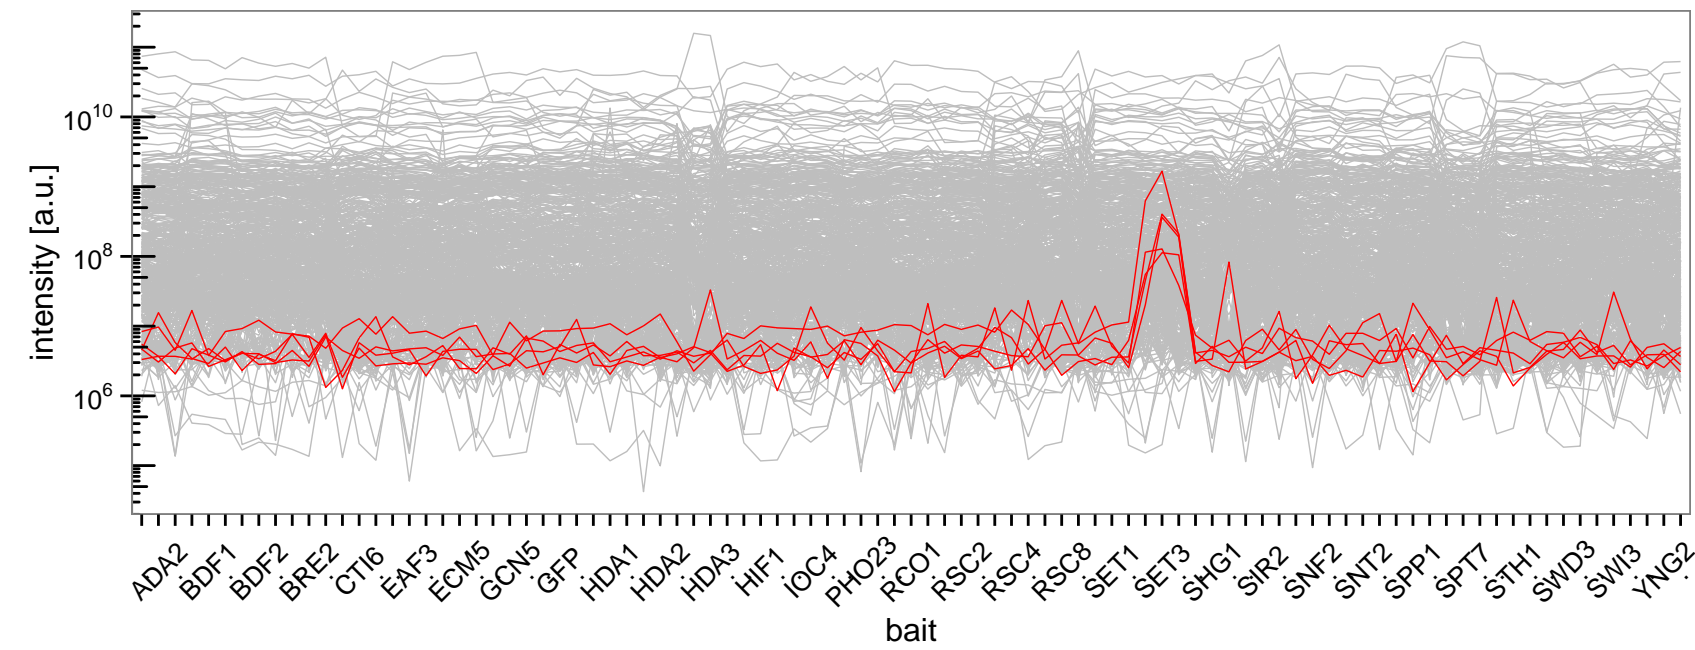

|                         | HOS2 | SET3 | SIF2 | SNT1 |
|-------------------------|------|------|------|------|
| <i>significance</i>     | 4.9  | 6.1  | 4.8  | 5.1  |
| <i>interactor class</i> | B+   | B+   | B+   | B+   |

|                   |            |
|-------------------|------------|
| <b>bait</b>       | SHG1       |
| <b>experiment</b> | 14 minutes |

|                    |     |
|--------------------|-----|
| <b>interactors</b> | 0   |
| <b>recovery</b>    | 0 % |

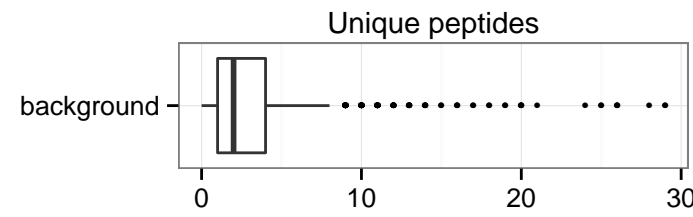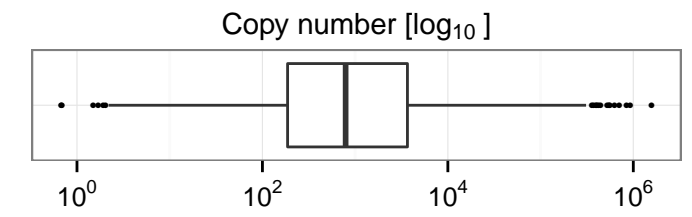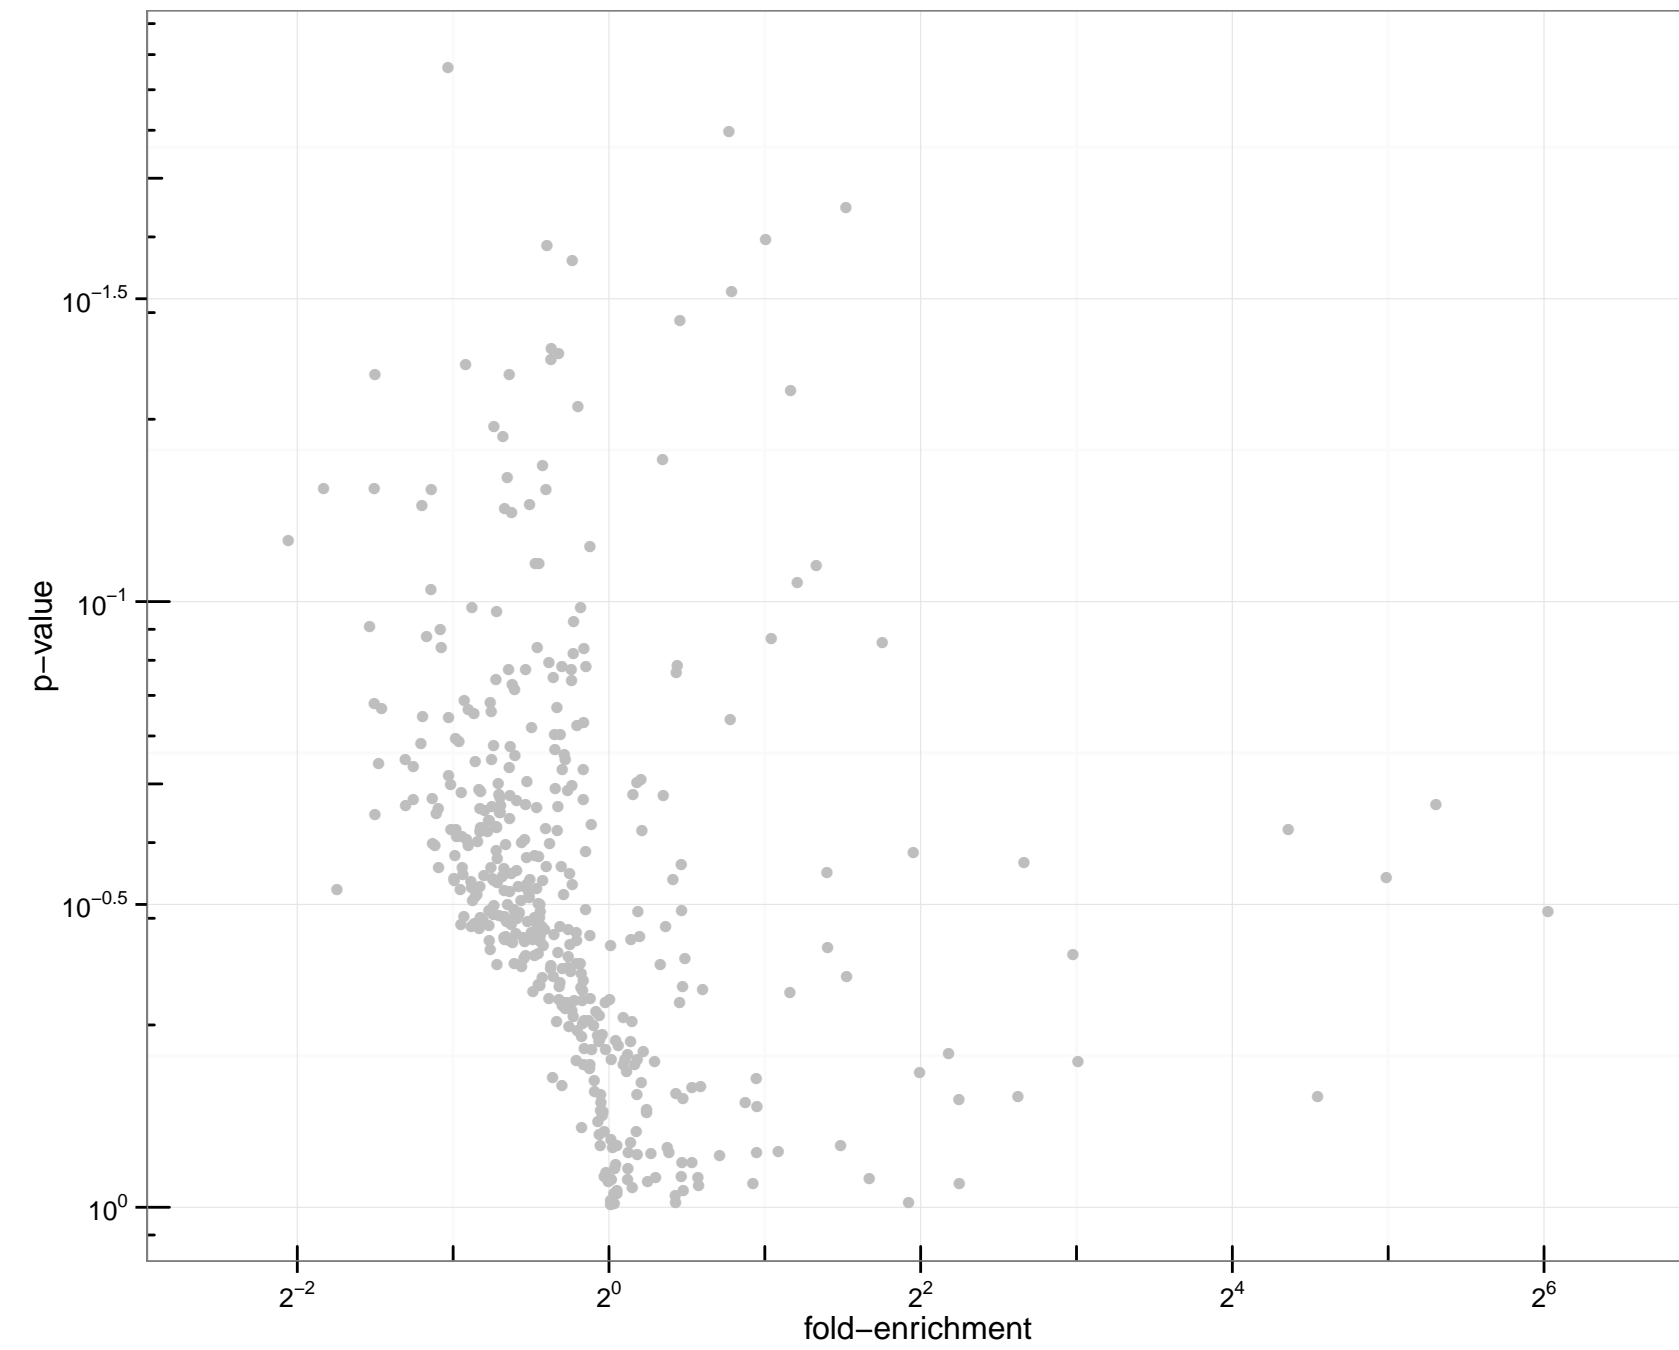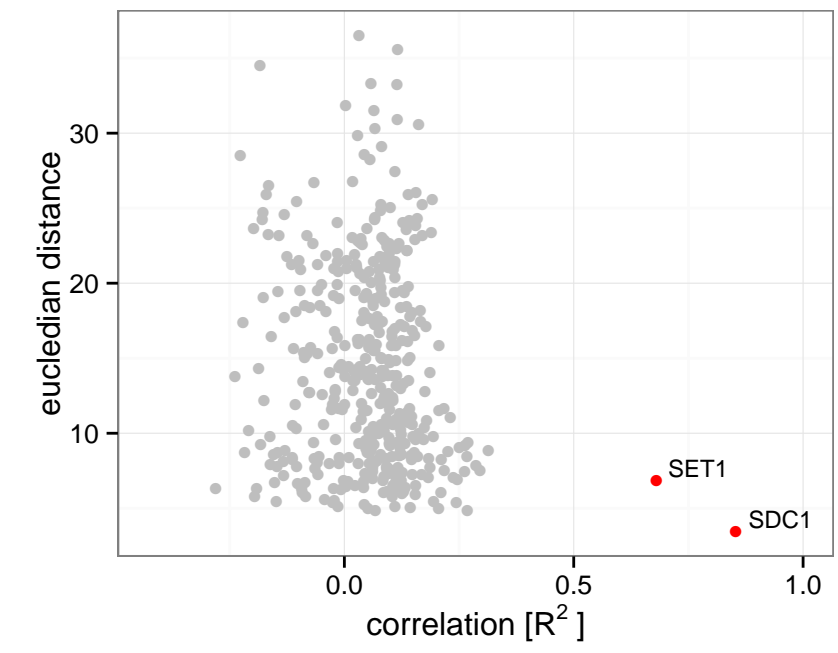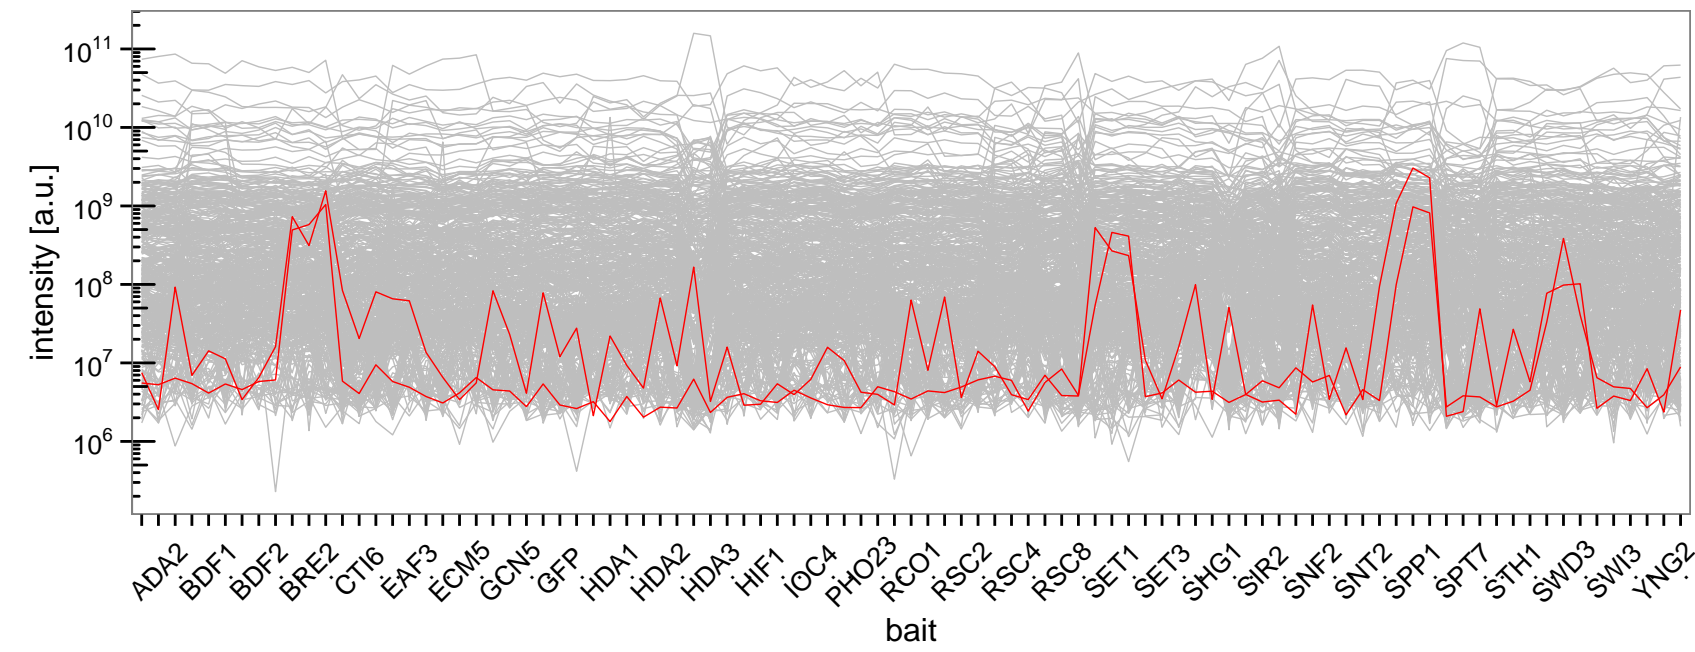

significance  
interactor class



|                   |            |
|-------------------|------------|
| <b>bait</b>       | SIR2       |
| <b>experiment</b> | 14 minutes |

|                    |      |
|--------------------|------|
| <b>interactors</b> | 3    |
| <b>recovery</b>    | 20 % |

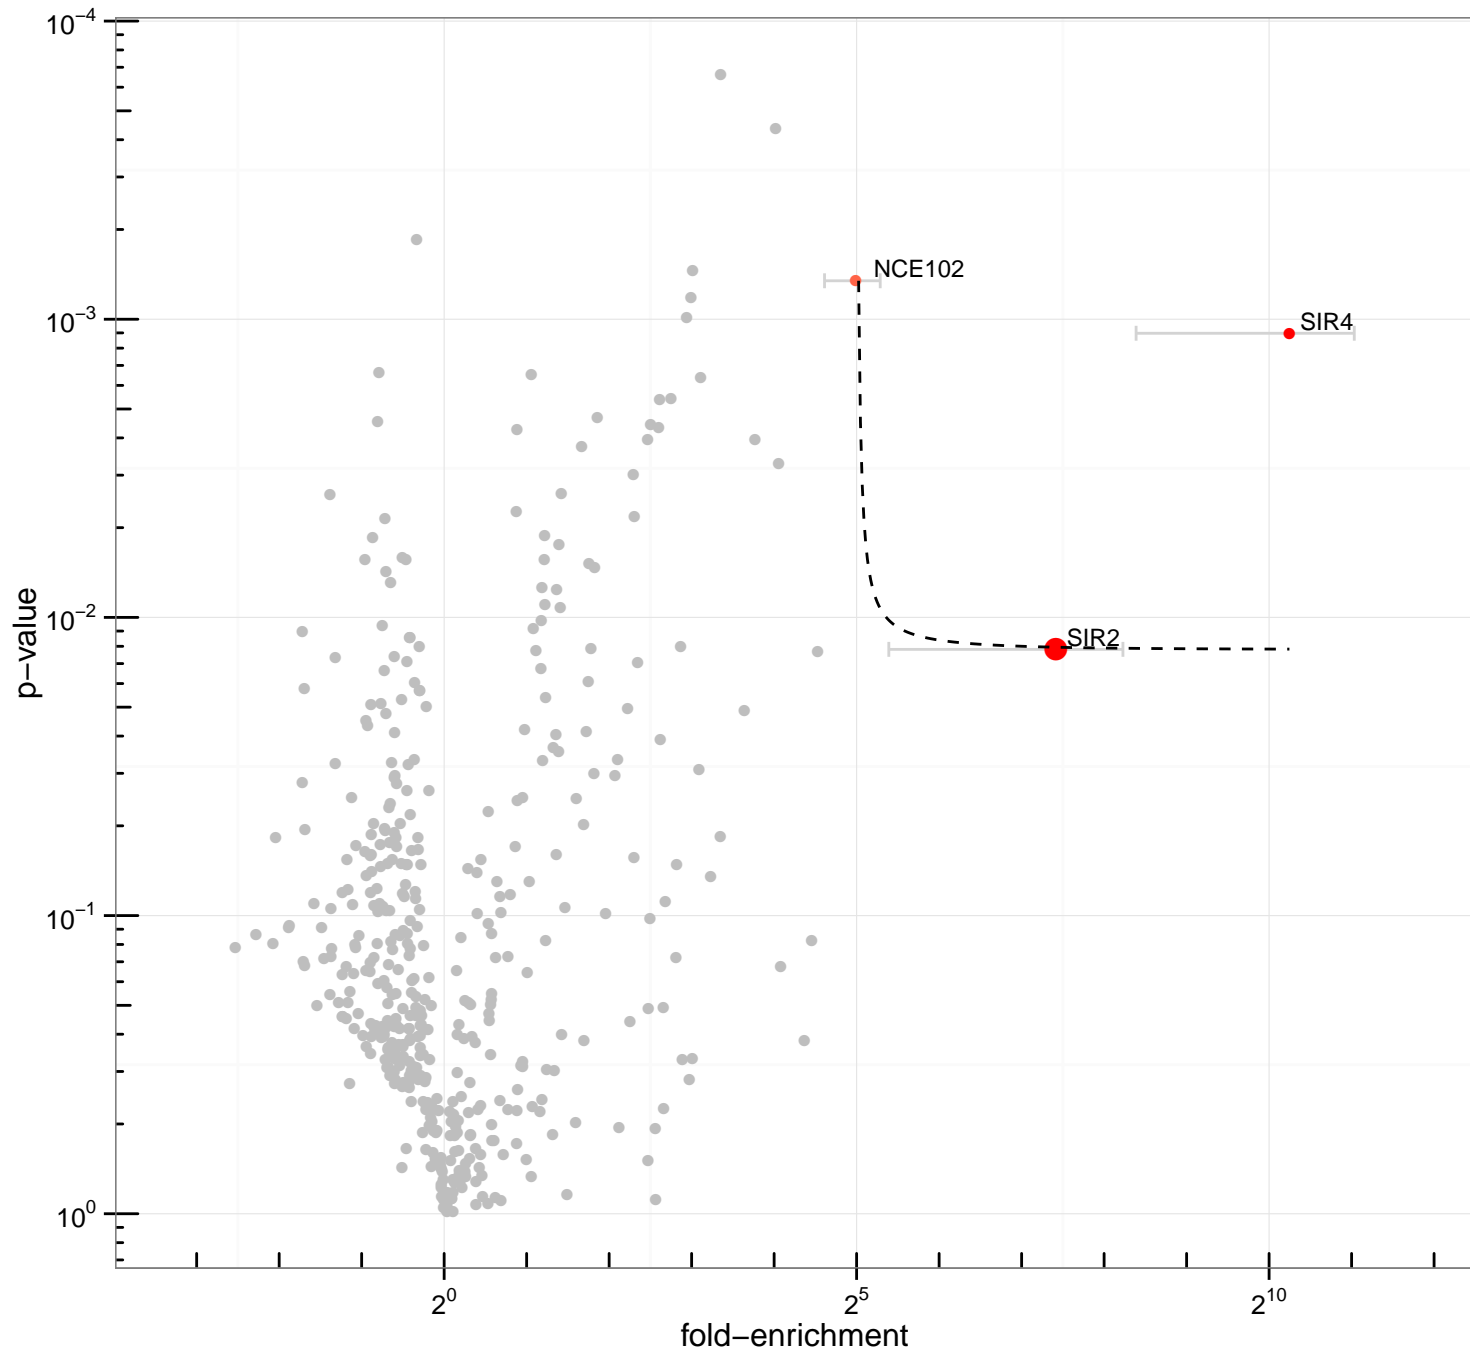

**Interactor class**

- A
- A+

|                         | NCE102 | SIR2 | SIR4 |
|-------------------------|--------|------|------|
| <i>significance</i>     | 5.1    | 6.7  | 9.7  |
| <i>interactor class</i> | A      | A+   | A+   |

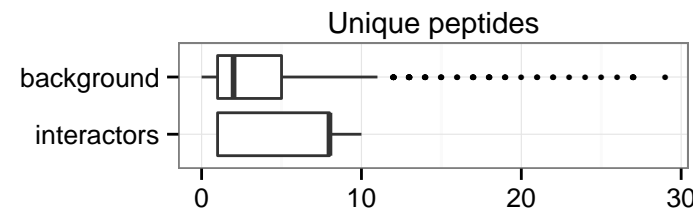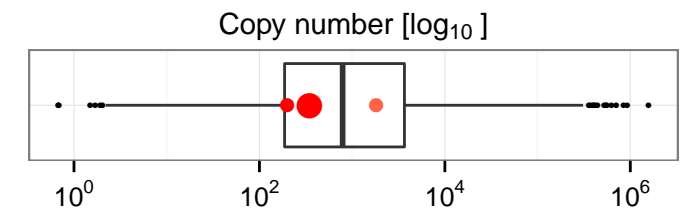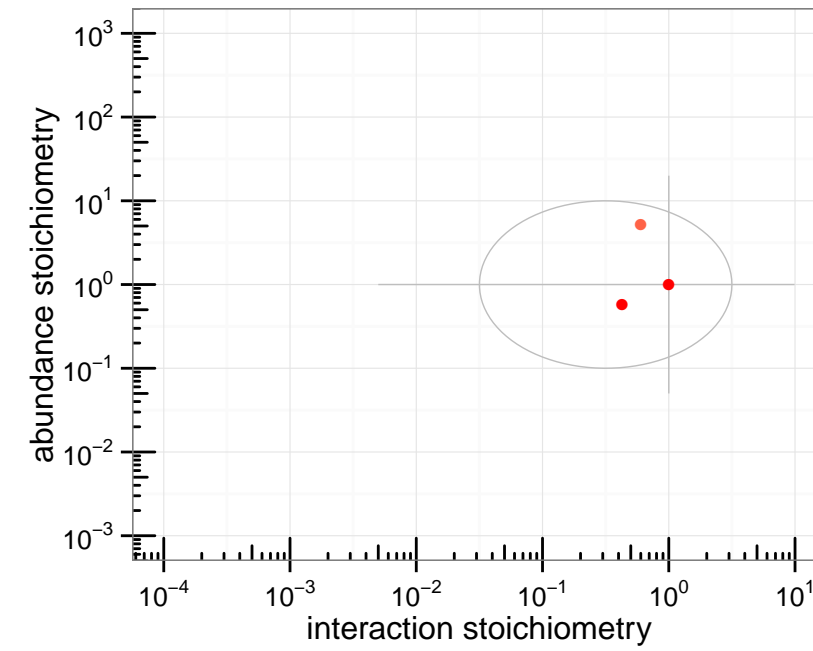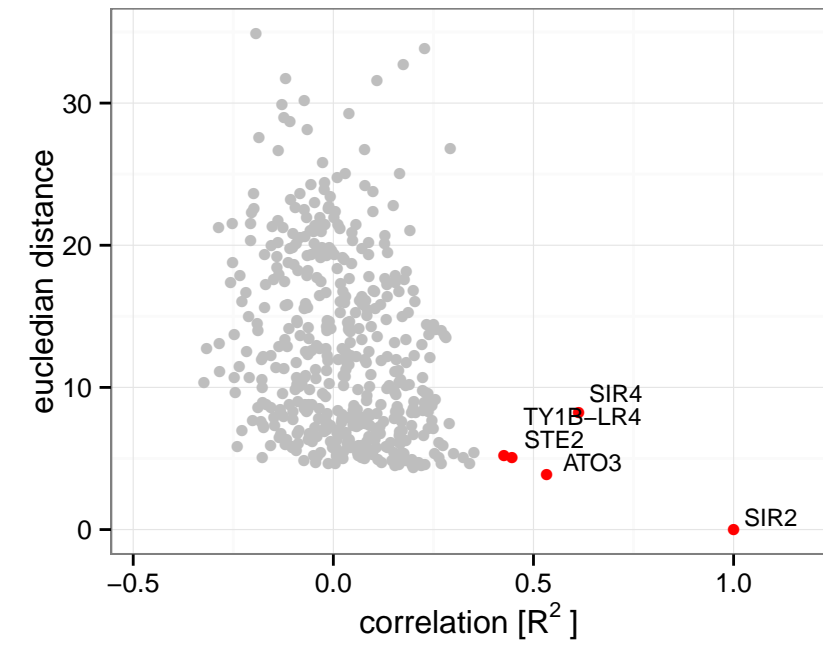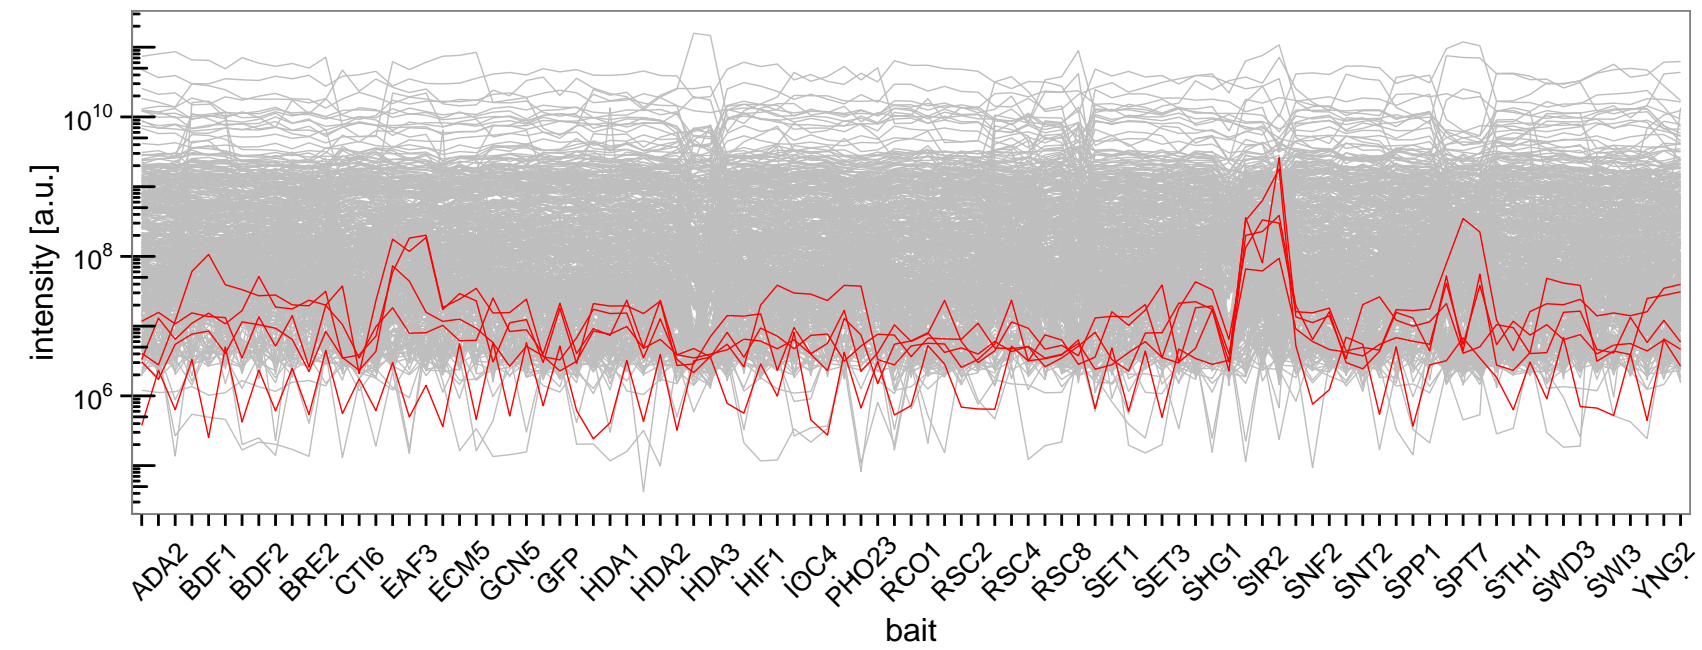

|                   |            |
|-------------------|------------|
| <b>bait</b>       | SNF2       |
| <b>experiment</b> | 14 minutes |

|                    |      |
|--------------------|------|
| <b>interactors</b> | 6    |
| <b>recovery</b>    | 64 % |

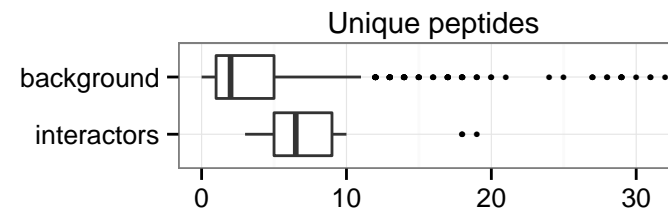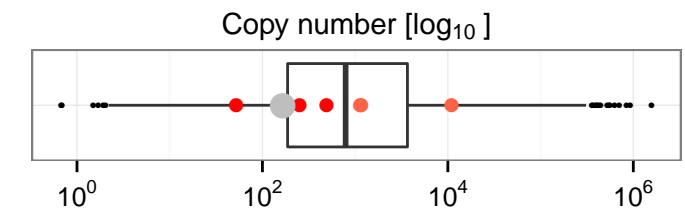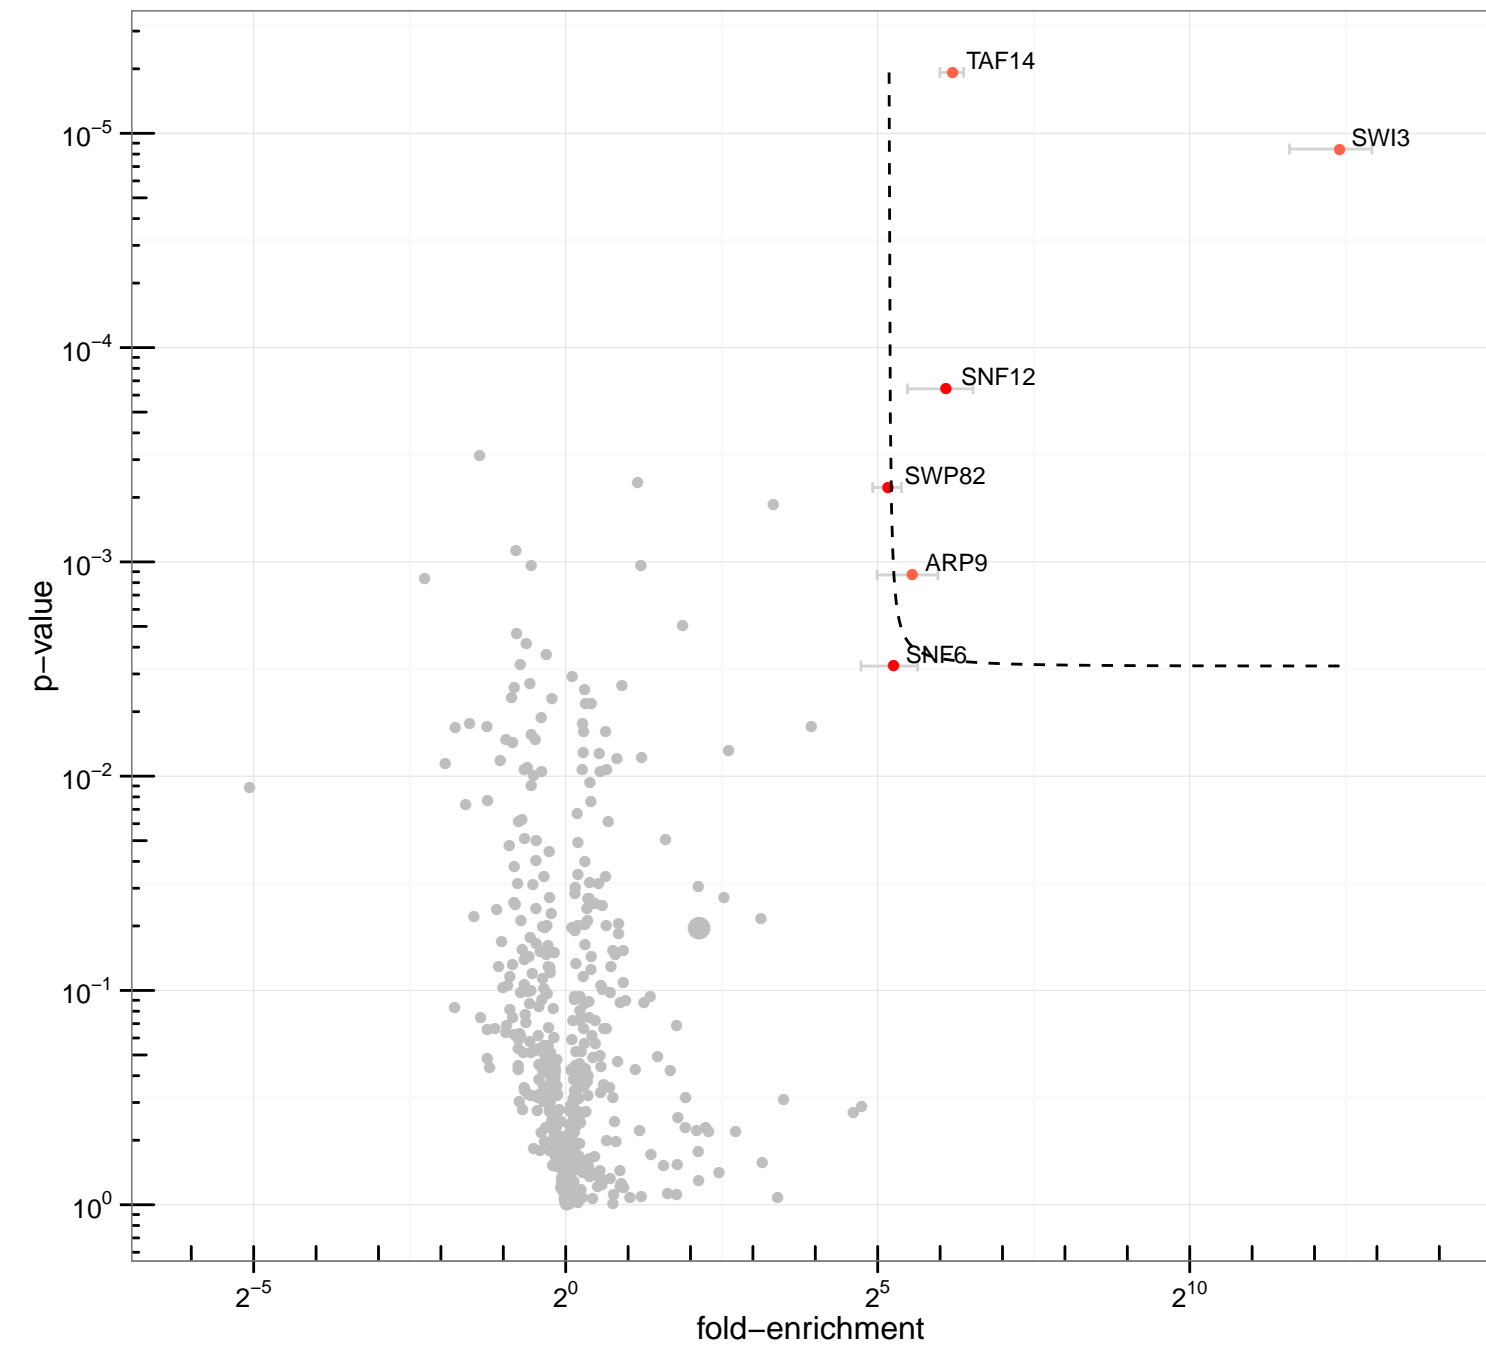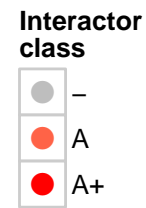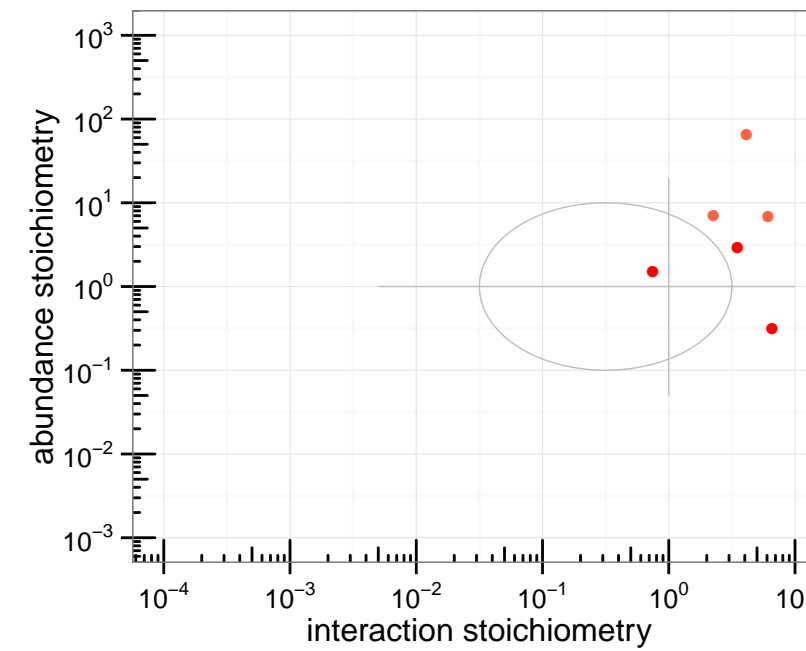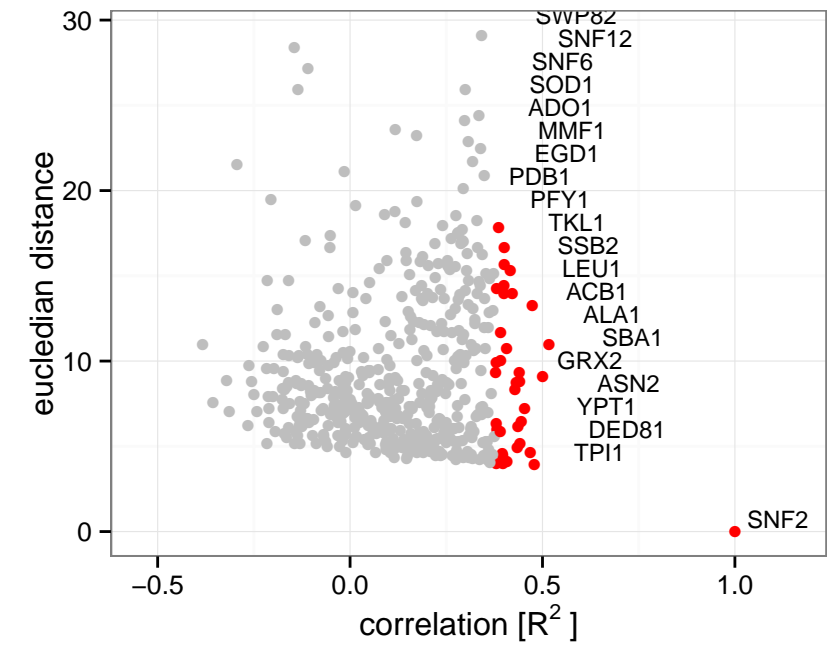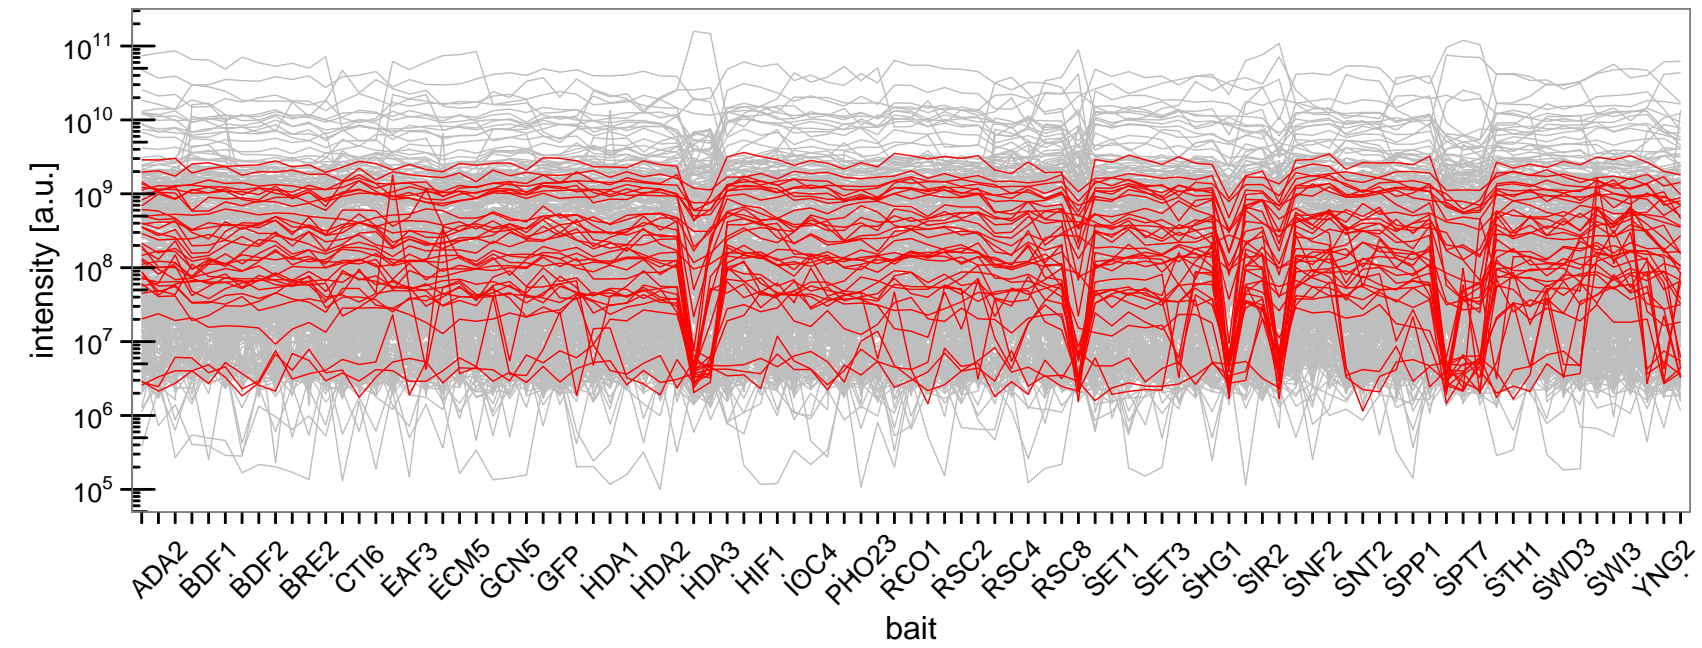

|                         | ARP9 | SNF12 | SNF6 | SWI3 | SWP82 | TAF14 |
|-------------------------|------|-------|------|------|-------|-------|
| <i>significance</i>     | 5.4  | 6.4   | 4.9  | 12.0 | 5.3   | 7.4   |
| <i>interactor class</i> | A    | A+    | A+   | A    | A+    | A     |

|                   |            |
|-------------------|------------|
| <b>bait</b>       | SNT2       |
| <b>experiment</b> | 14 minutes |

|                    |     |
|--------------------|-----|
| <b>interactors</b> | 0   |
| <b>recovery</b>    | 0 % |

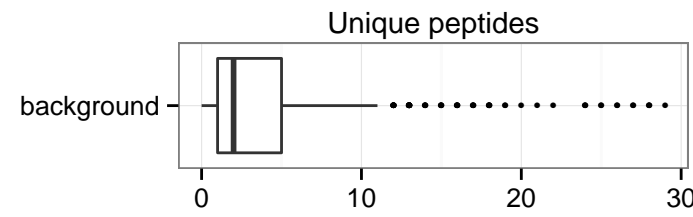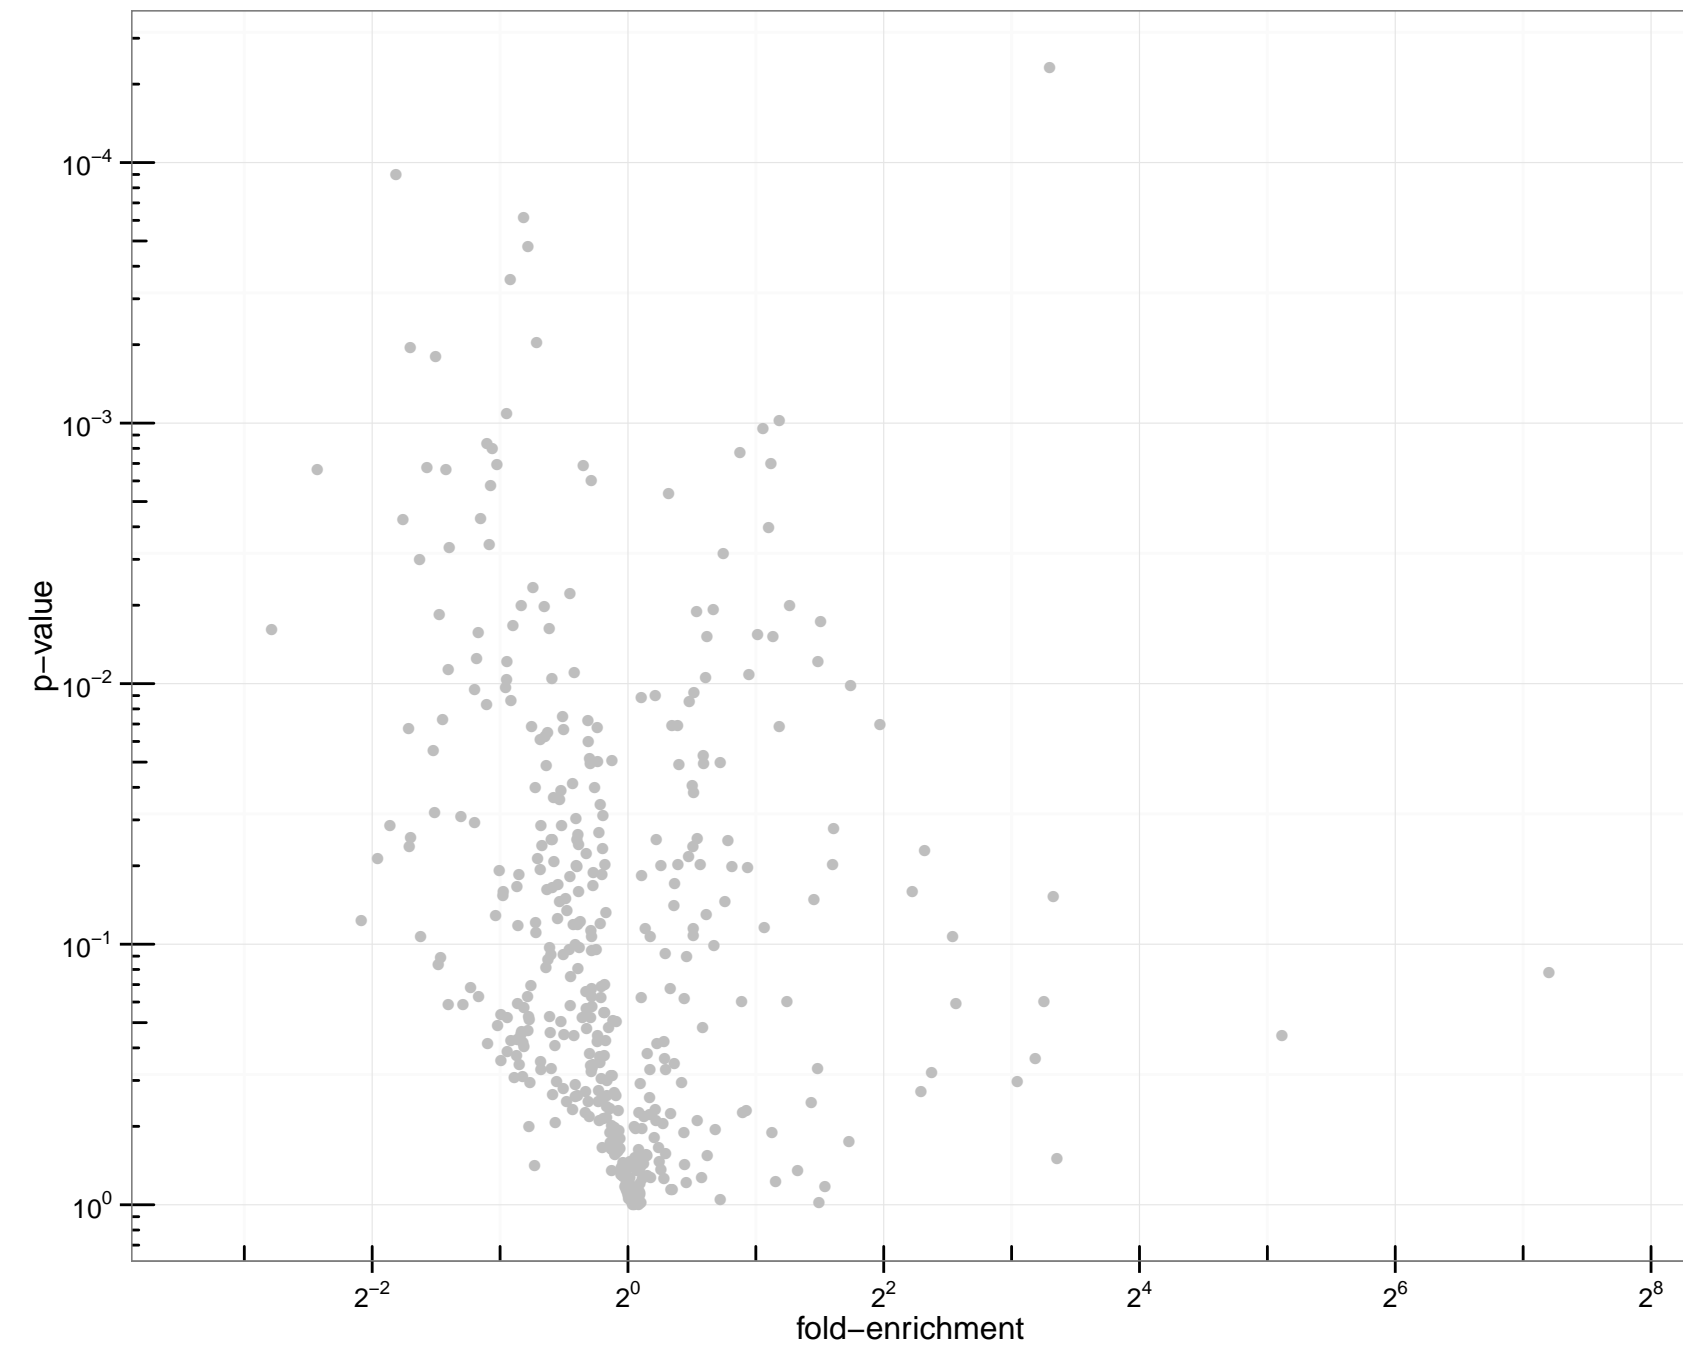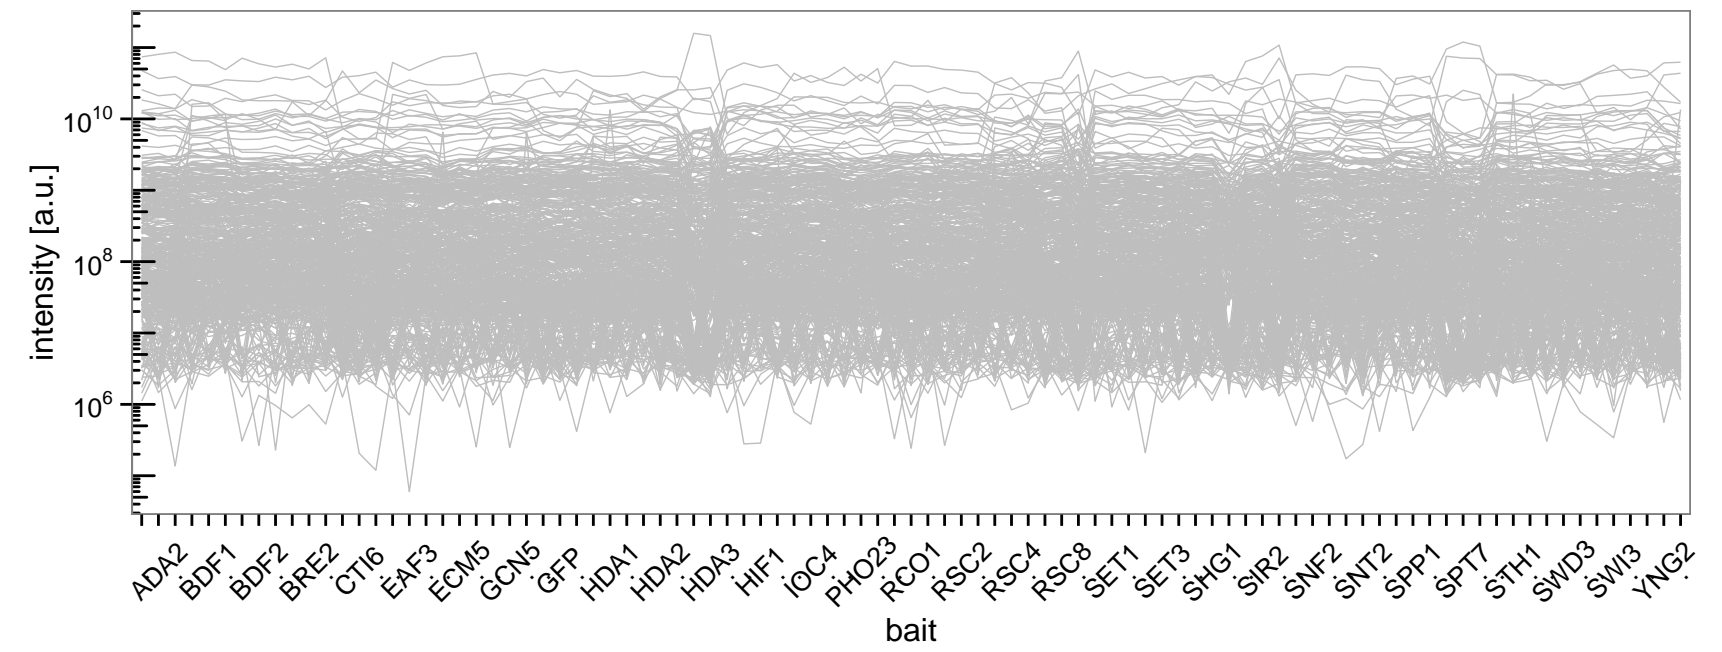

significance

interactor class

|                   |            |
|-------------------|------------|
| <b>bait</b>       | SPP1       |
| <b>experiment</b> | 14 minutes |

|                    |       |
|--------------------|-------|
| <b>interactors</b> | 8     |
| <b>recovery</b>    | 100 % |

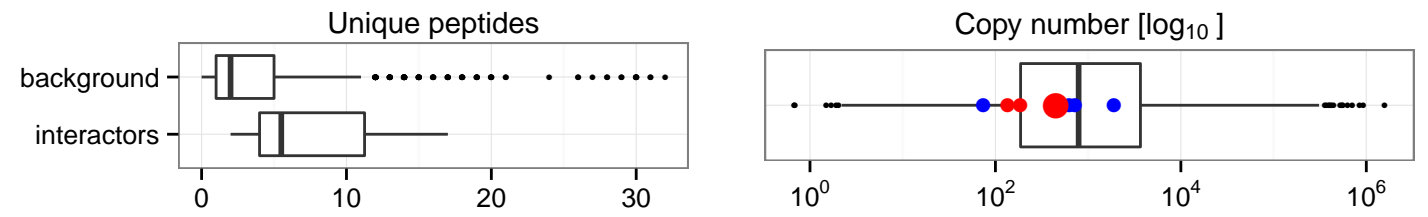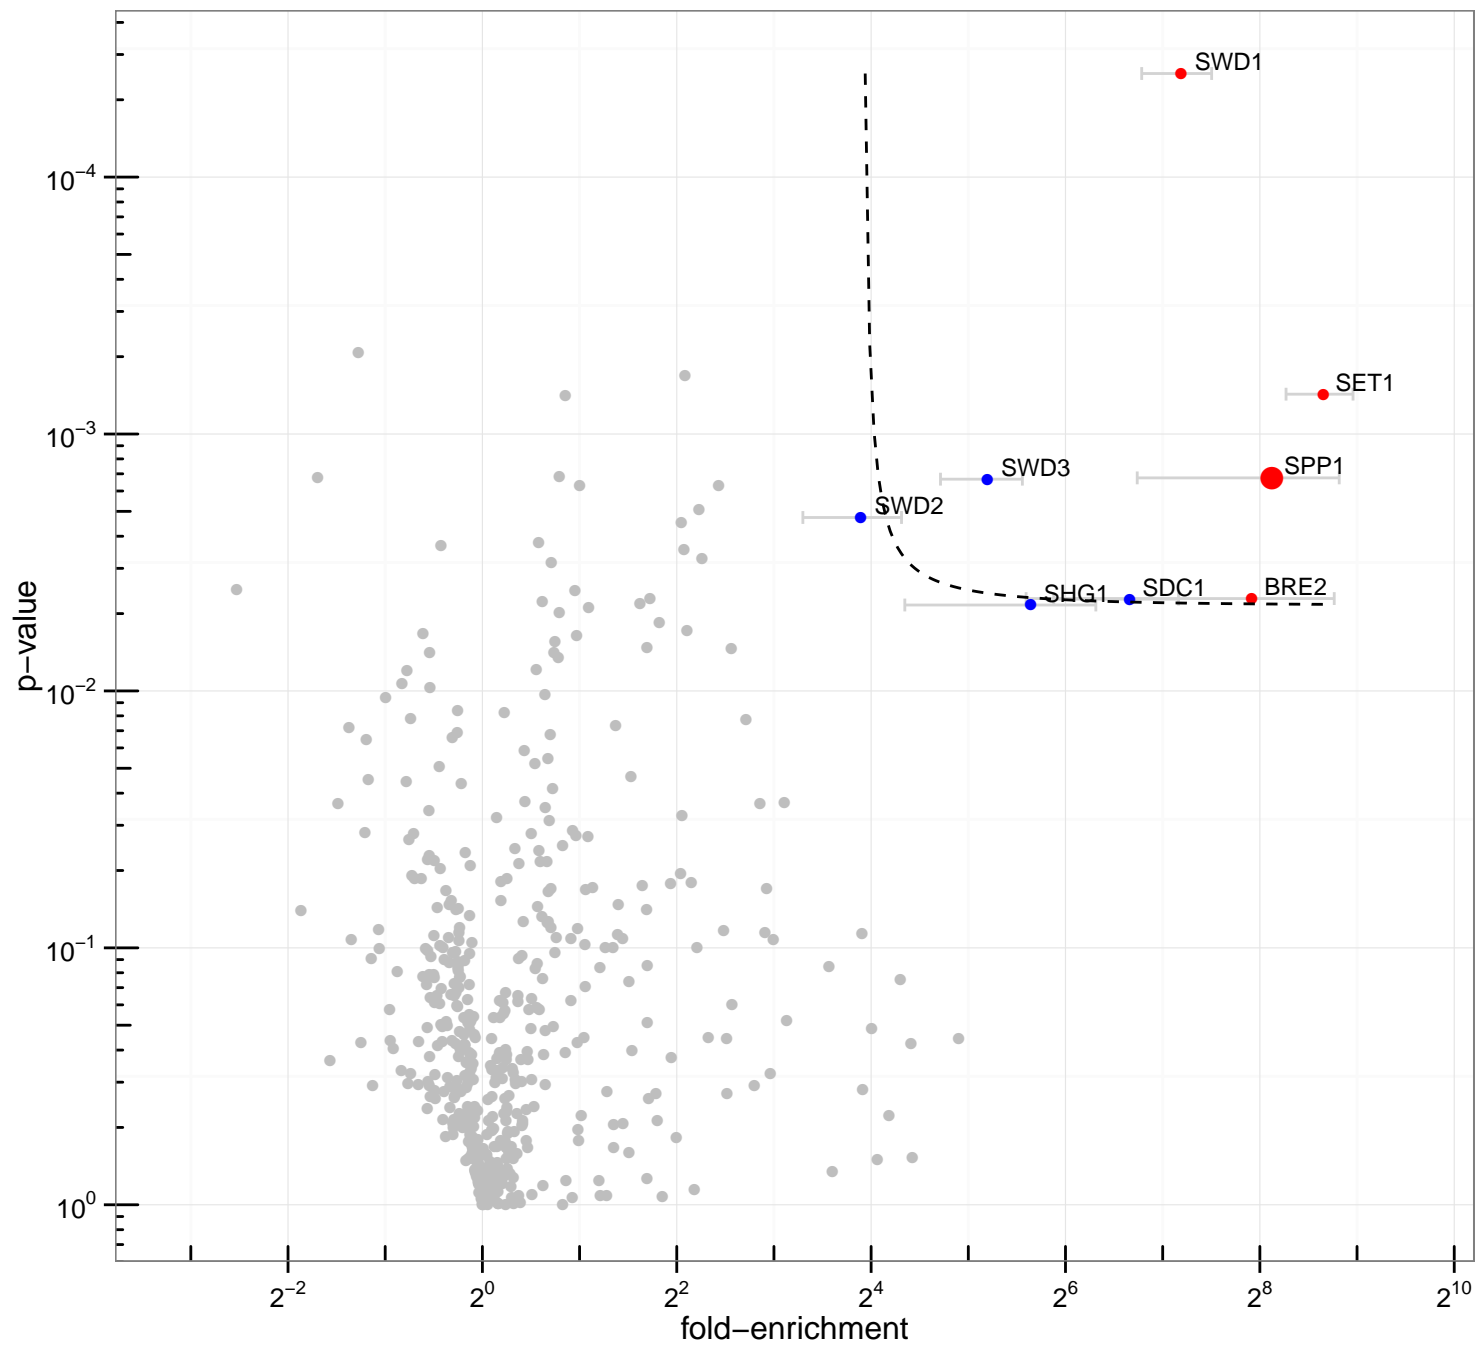

**Interactor class**

- A+
- B+

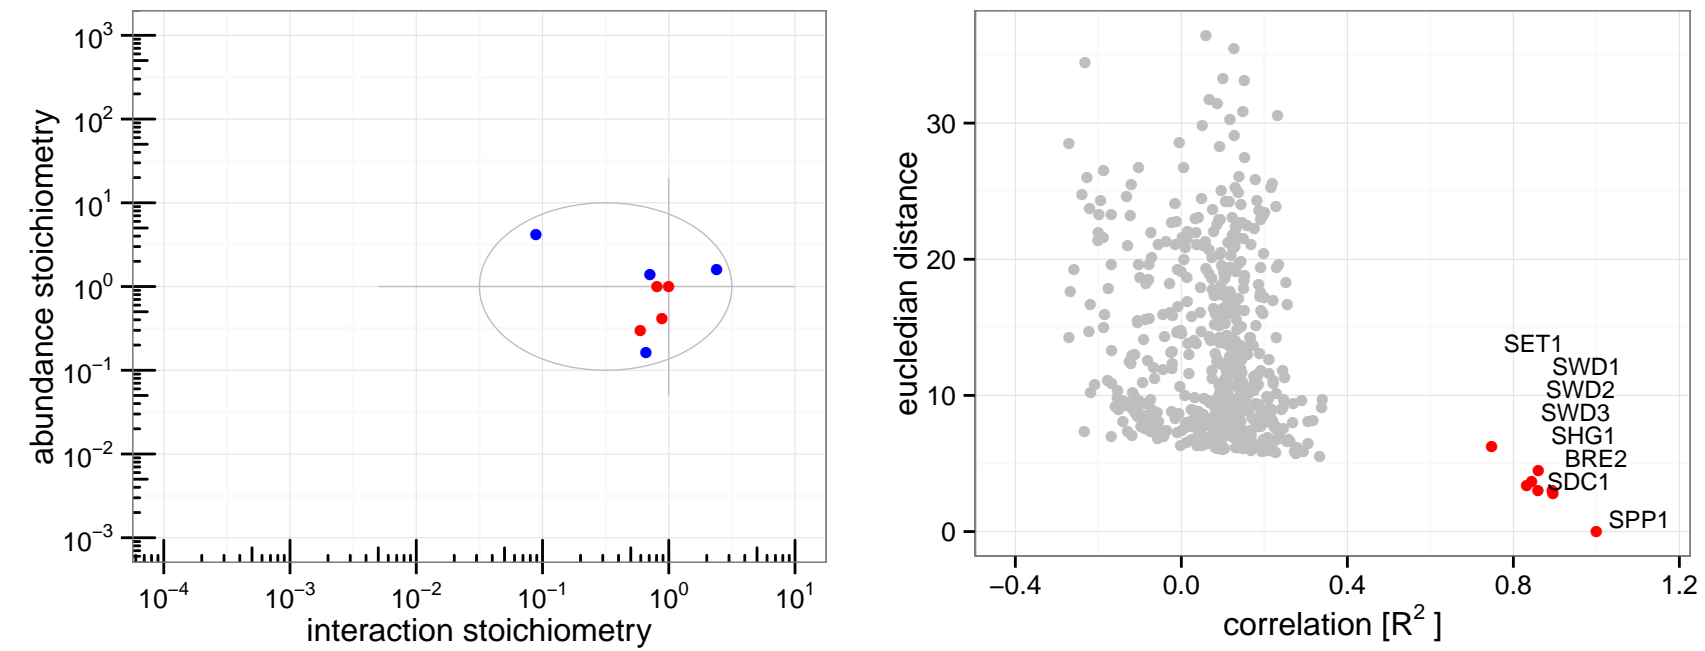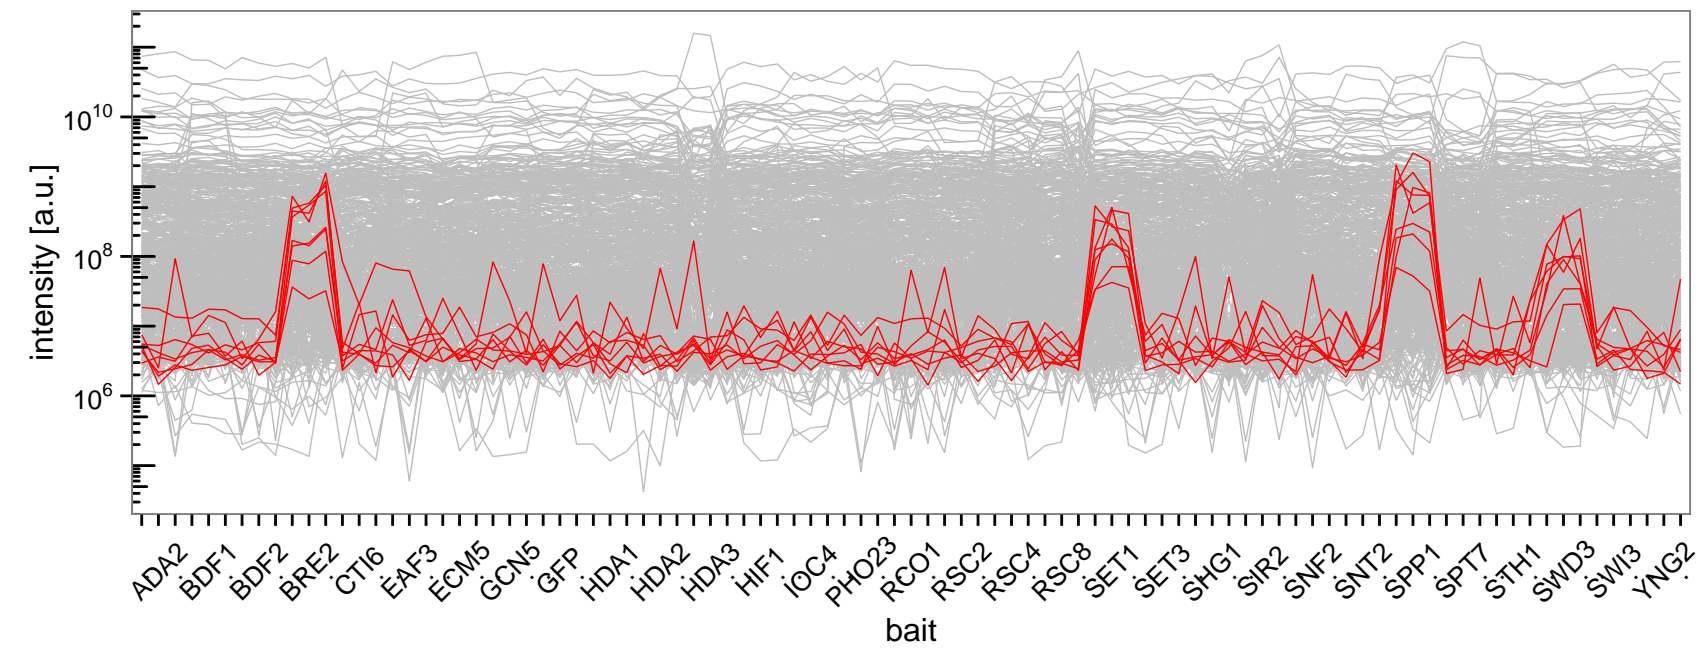

|                         | BRE2 | SDC1 | SET1 | SHG1 | SPP1 | SWD1 | SWD2 | SWD3 |
|-------------------------|------|------|------|------|------|------|------|------|
| <i>significance</i>     | 7.3  | 6.1  | 8.3  | 5.2  | 7.7  | 7.6  | 3.9  | 5.1  |
| <i>interactor class</i> | A+   | B+   | A+   | B+   | A+   | A+   | B+   | B+   |

|                   |            |
|-------------------|------------|
| <b>bait</b>       | SPT7       |
| <b>experiment</b> | 14 minutes |

|                    |      |
|--------------------|------|
| <b>interactors</b> | 64   |
| <b>recovery</b>    | 74 % |

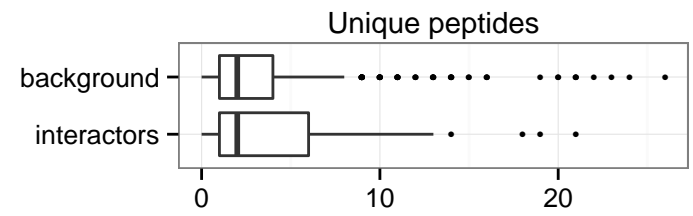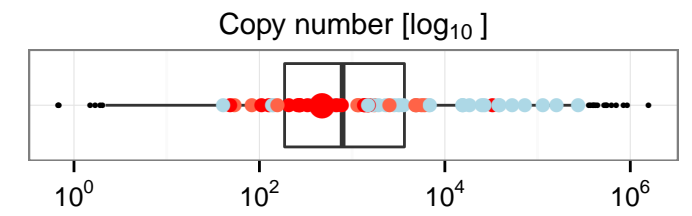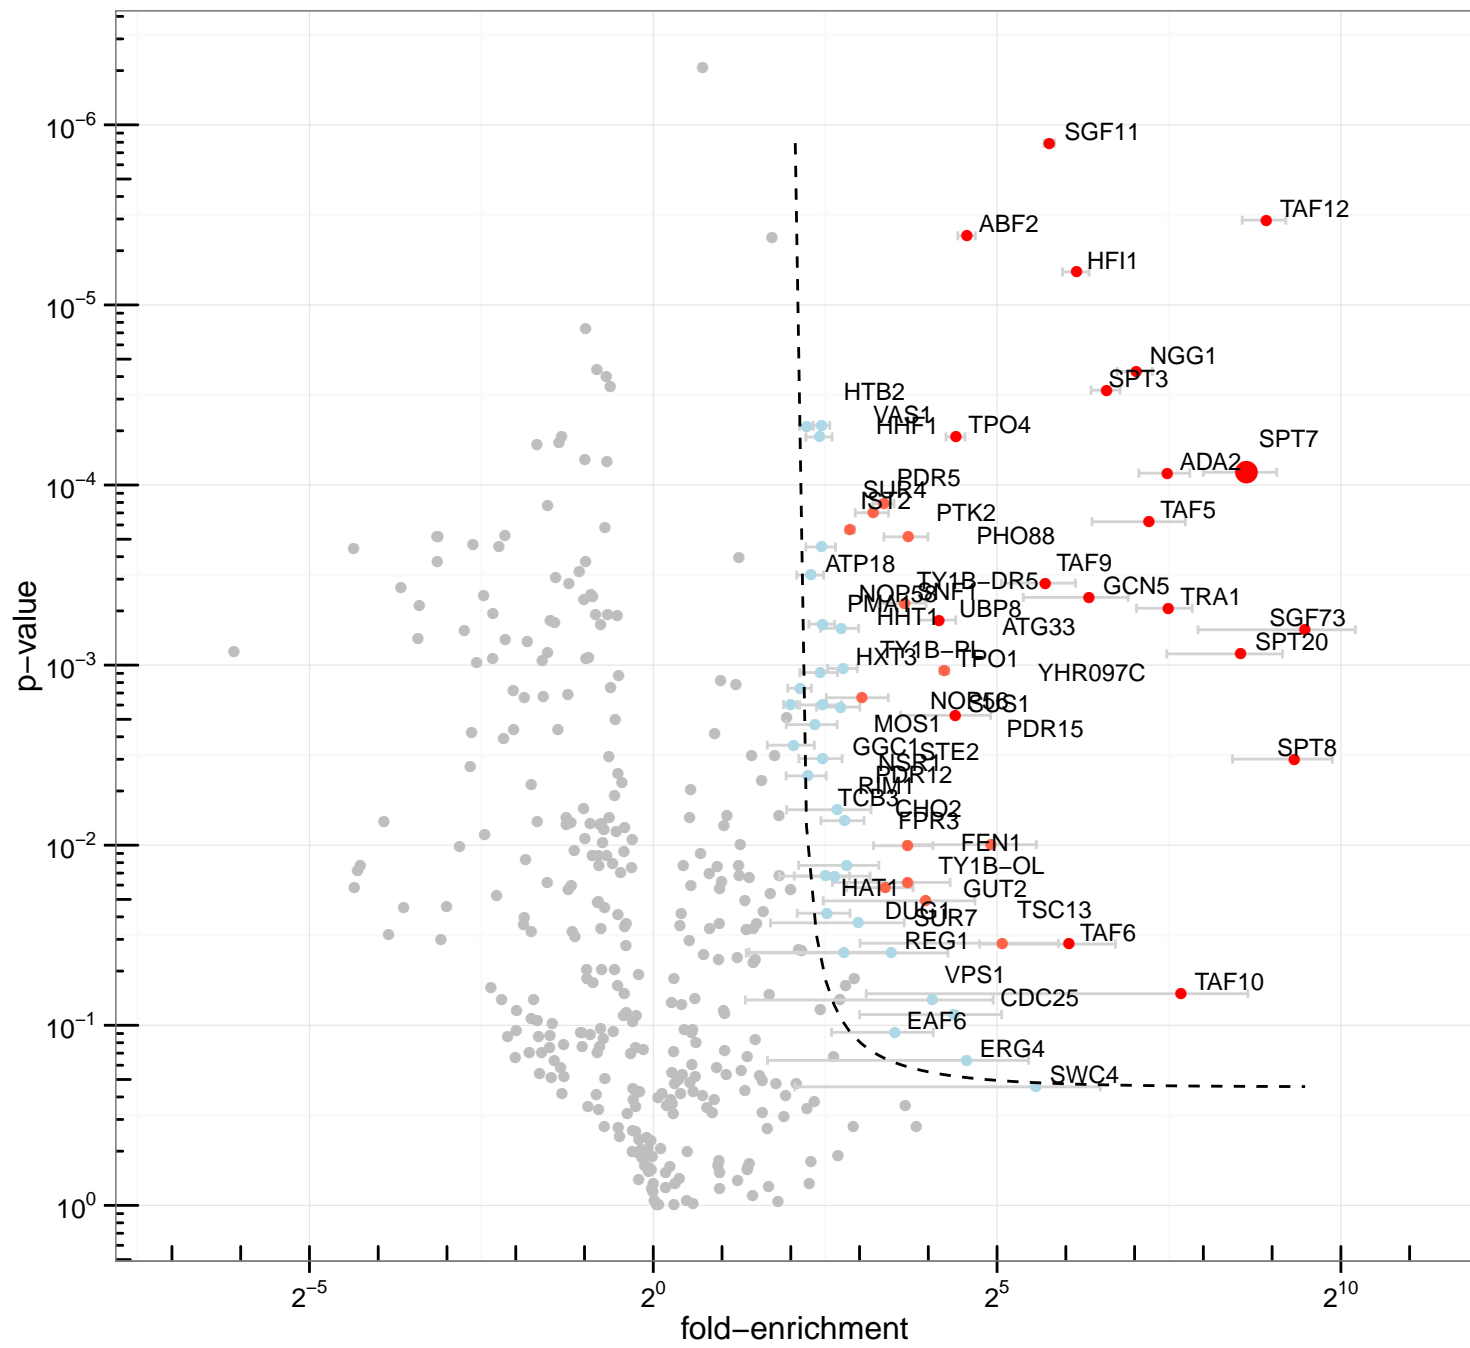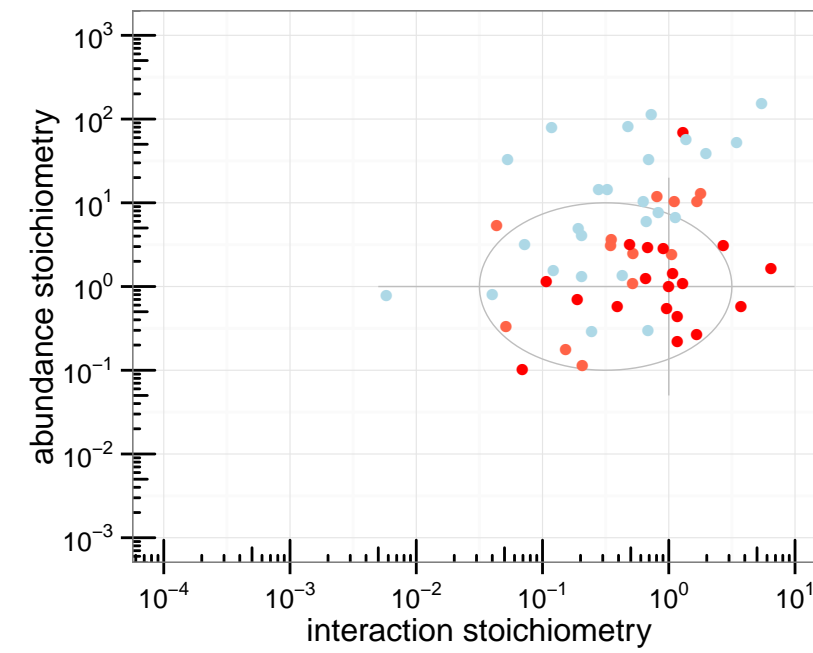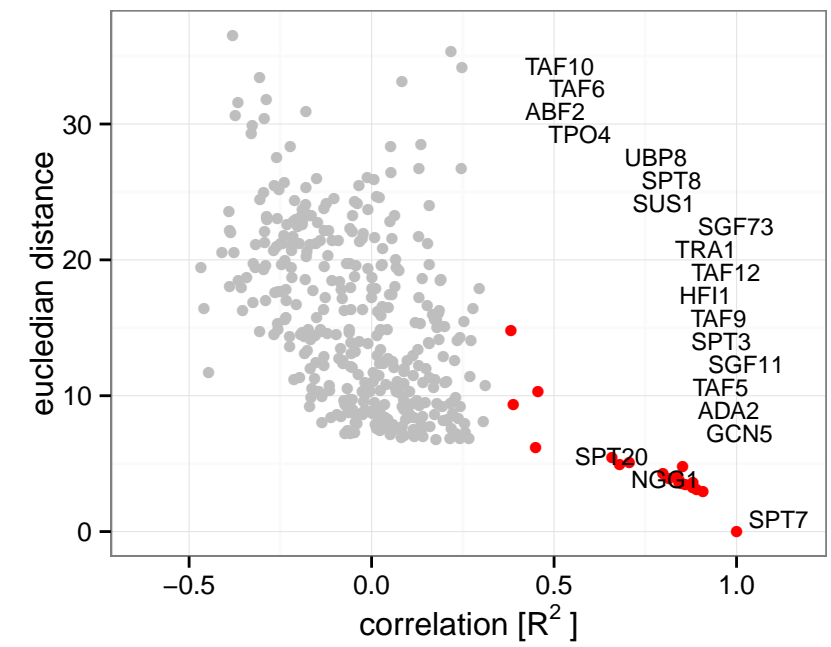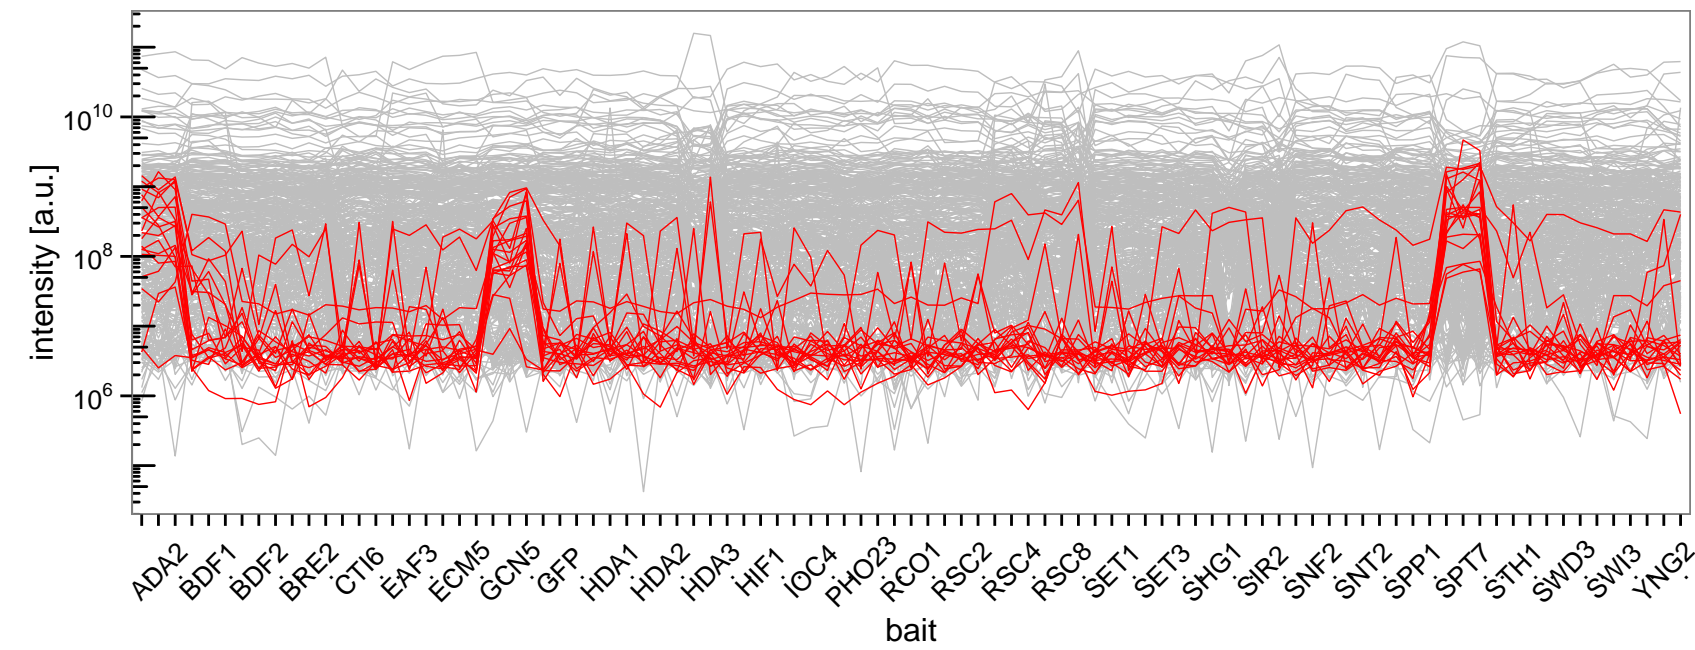

|                         | ABF2 | ADA2 | ATG33 | FEN1 | GCN5 | GUT2 | HFI1 | IST2 | NGG1 | PDR15 | PDR5 | PTK2 | SGF11 | SGF73 | SNF1 | SPT20 | SPT3 | SPT7 | SPT8 | STE2 | SUR4 | SUS1 | TAF10 | TAF12 | TAF5 | TAF6 | TAF9 | TPO1 | TPO4 | TRA1 | TSC13 | TY1B-OL | UBP8 |
|-------------------------|------|------|-------|------|------|------|------|------|------|-------|------|------|-------|-------|------|-------|------|------|------|------|------|------|-------|-------|------|------|------|------|------|------|-------|---------|------|
| <i>significance</i>     | 6.5  | 7.6  | 3.5   | 3.2  | 6.3  | 3.4  | 7.3  | 4.4  | 7.6  | 4.4   | 4.6  | 4.6  | 7.6   | 9.1   | 4.3  | 8.1   | 7.2  | 8.6  | 8.7  | 3.4  | 4.2  | 4.4  | 6.8   | 9.6   | 7.3  | 5.3  | 5.8  | 4.4  | 5.5  | 7.3  | 4.3   | 3.0     | 4.5  |
| <i>interactor class</i> | A+   | A+   | A     | A    | A+   | A    | A+   | A    | A+   | A     | A    | A    | A+    | A+    | A    | A+    | A+   | A+   | A+   | A    | A    | A+   | A+    | A+    | A+   | A+   | A    | A+   | A+   | A    | A     | A       | A+   |

|                   |            |
|-------------------|------------|
| <b>bait</b>       | STH1       |
| <b>experiment</b> | 14 minutes |

|                    |      |
|--------------------|------|
| <b>interactors</b> | 22   |
| <b>recovery</b>    | 82 % |

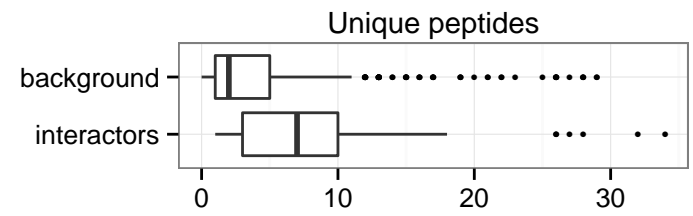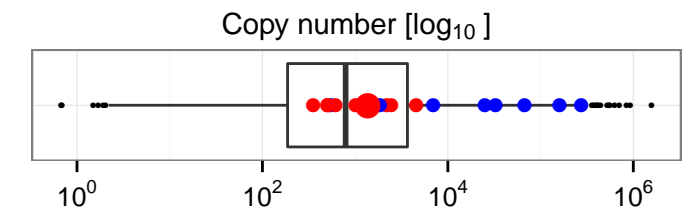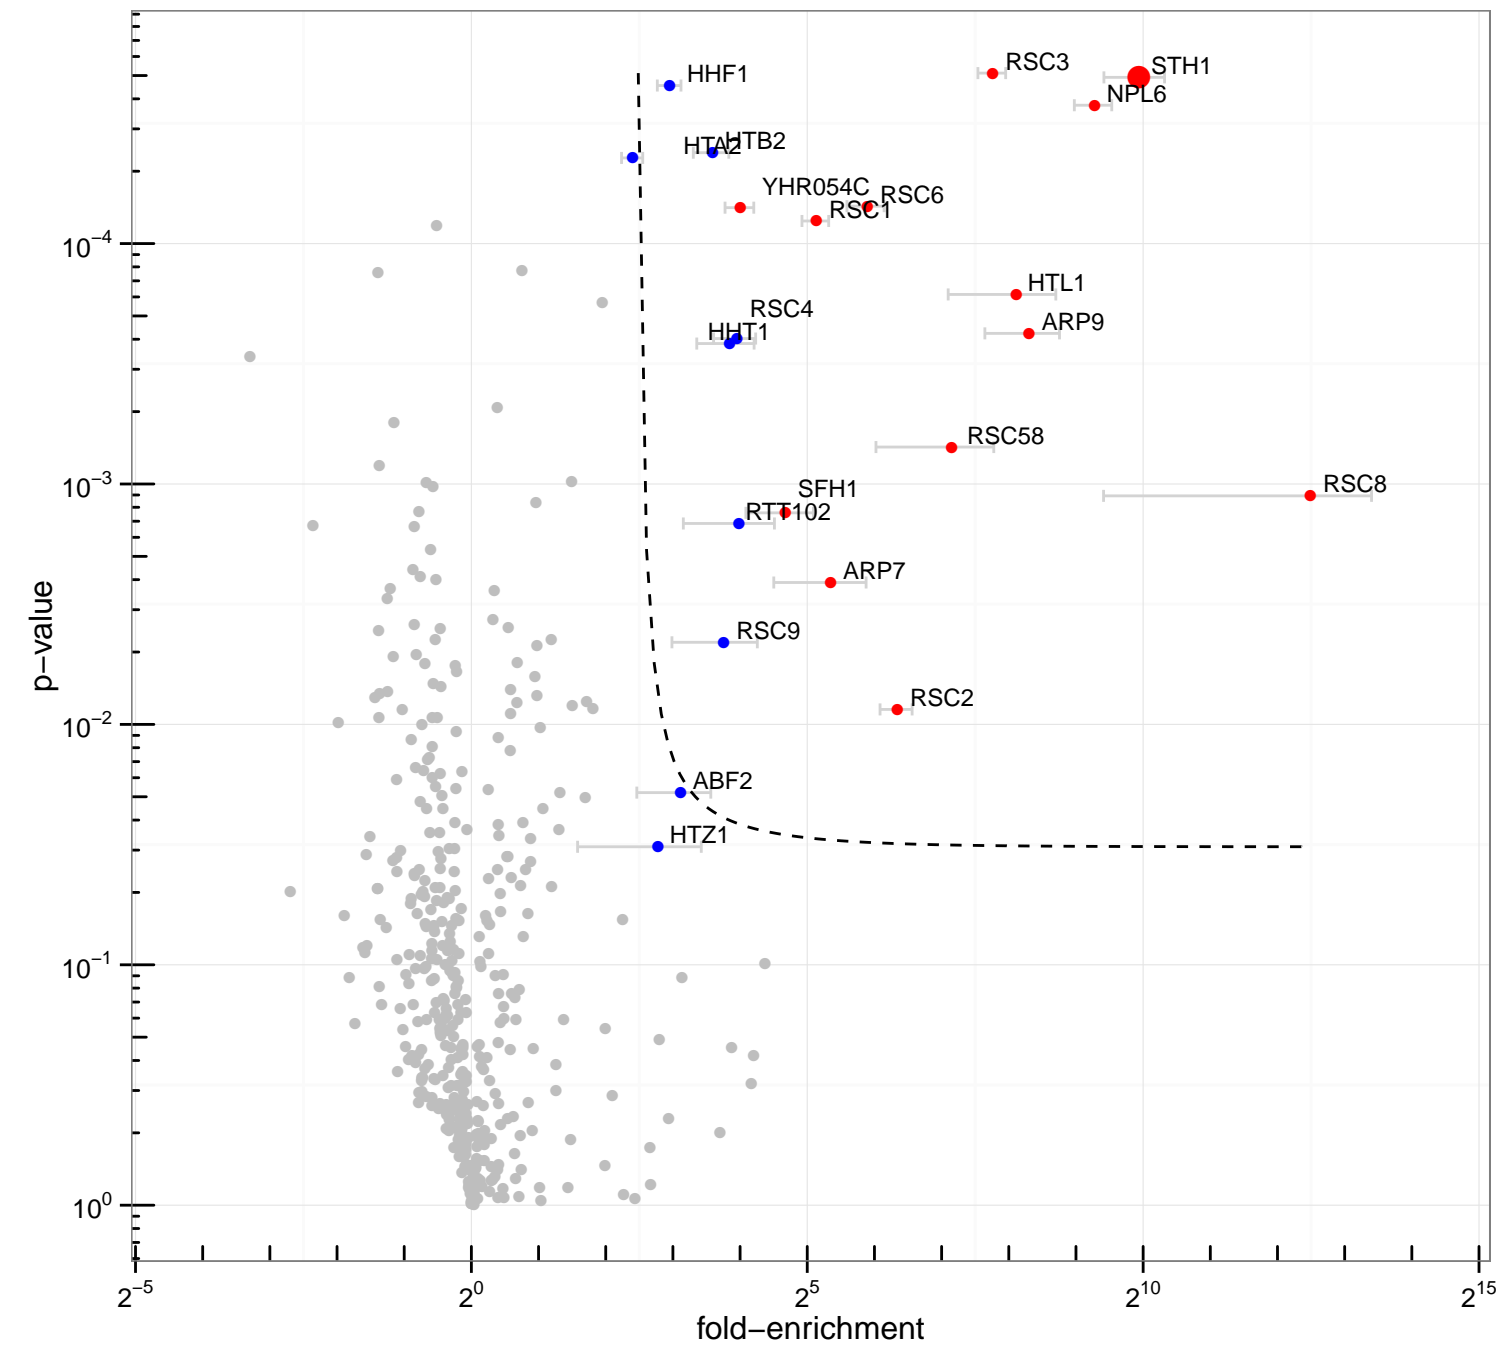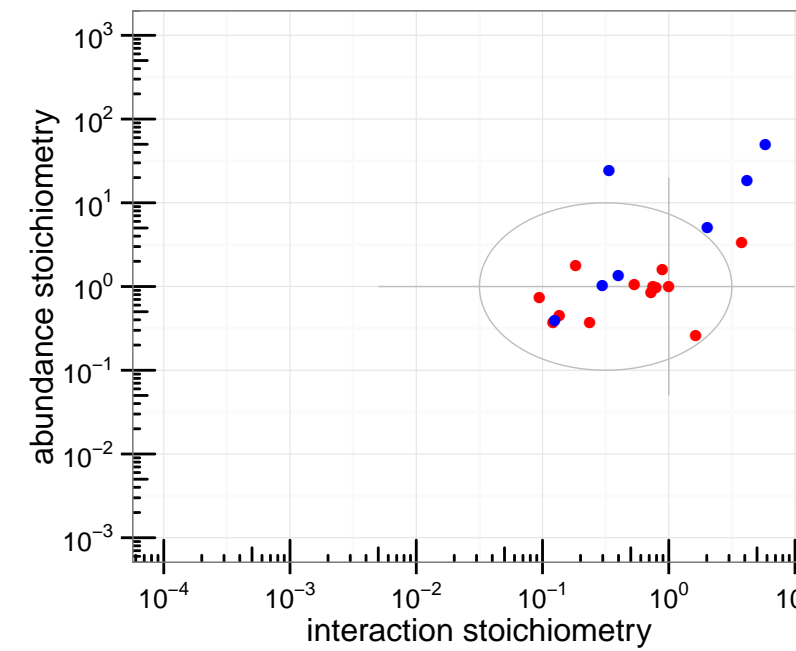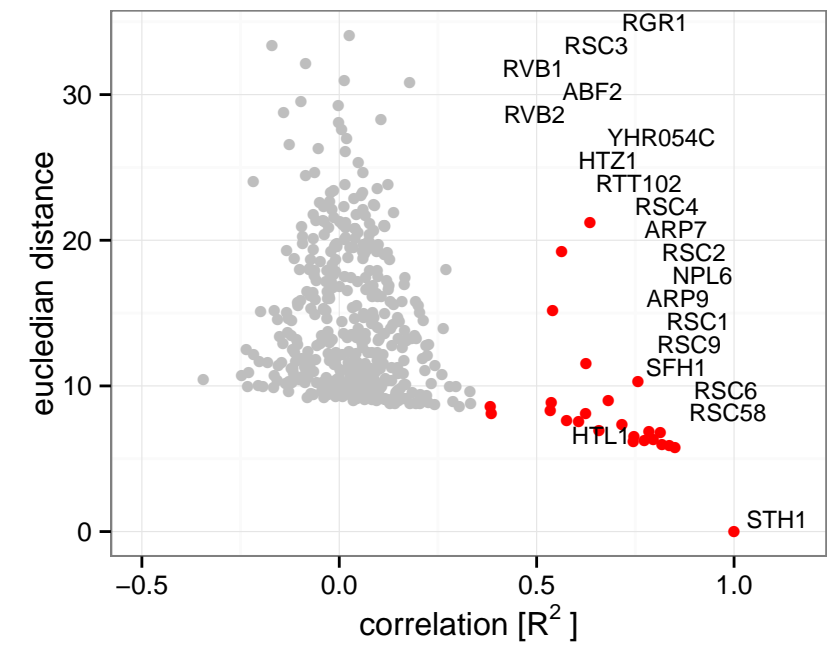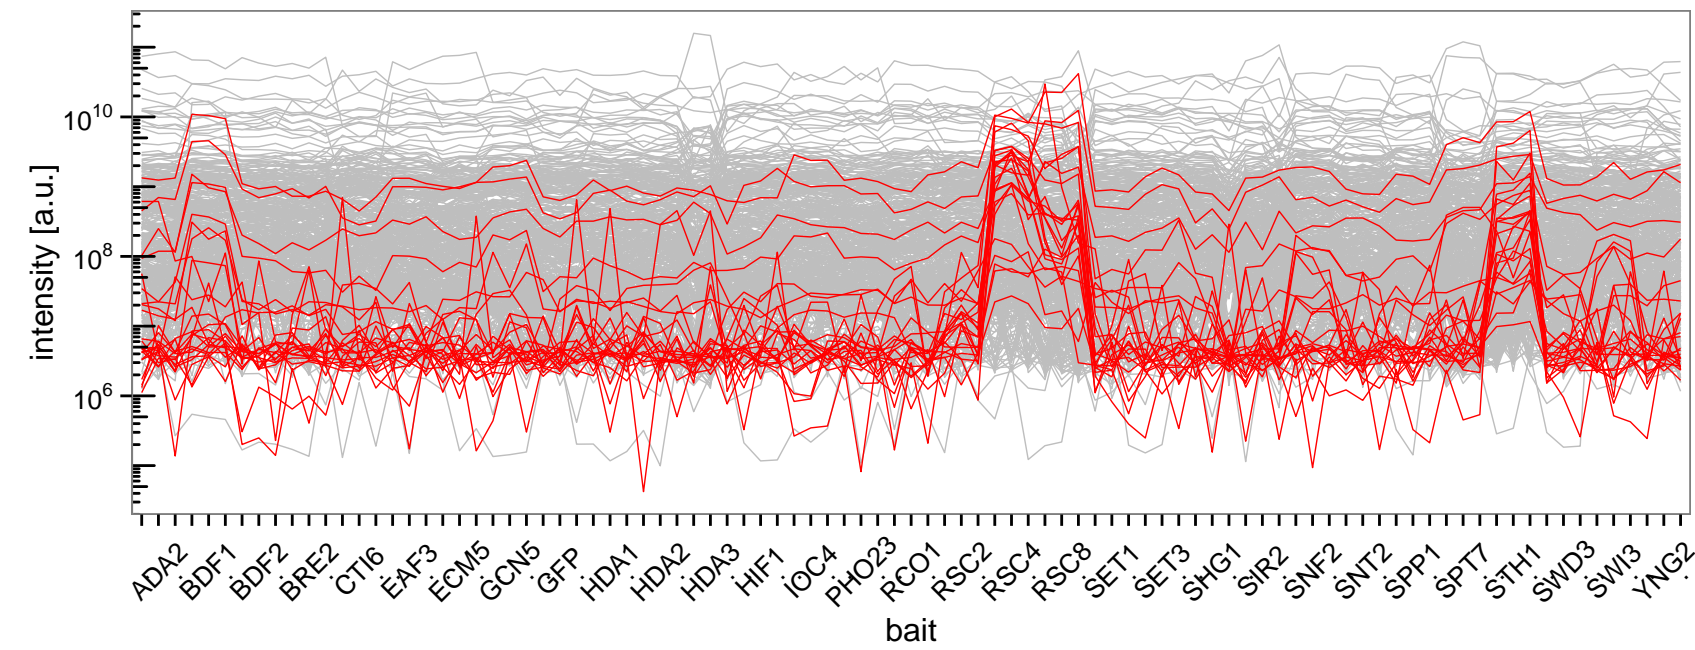

|                         | ABF2 | ARP7 | ARP9 | HHF1 | HHT1 | HTA2 | HTB2 | HTL1 | HTZ1 | NPL6 | RSC1 | RSC2 | RSC3 | RSC4 | RSC58 | RSC6 | RSC8 | RSC9 | RTT102 | SFH1 | STH1 | YHR054C |    |
|-------------------------|------|------|------|------|------|------|------|------|------|------|------|------|------|------|-------|------|------|------|--------|------|------|---------|----|
| <i>significance</i>     | 2.7  | 5.1  | 8.2  | 5.1  | 4.6  | 4.6  | 5.1  | 8.1  | 2.3  | 9.5  | 5.8  | 5.7  | 8.2  | 4.7  | 6.9   | 6.4  | 12.0 | 3.6  | 4.1    | 4.7  | 10.0 | 5.1     |    |
| <i>interactor class</i> | B+   | A+   | A+   | B+   | B+   | B+   | B+   | A+   | B+   | A+   | A+   | A+   | A+   | B+   | A+    | A+   | A+   | B+   | B+     | A+   | A+   | A+      | A+ |

|                   |            |
|-------------------|------------|
| <b>bait</b>       | SWD3       |
| <b>experiment</b> | 14 minutes |

|                    |      |
|--------------------|------|
| <b>interactors</b> | 4    |
| <b>recovery</b>    | 43 % |

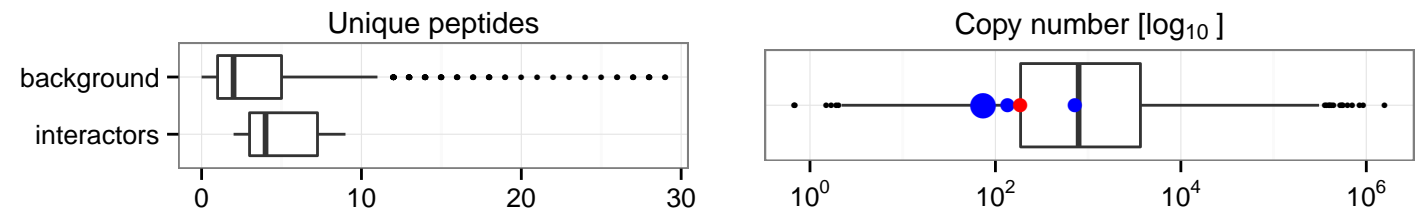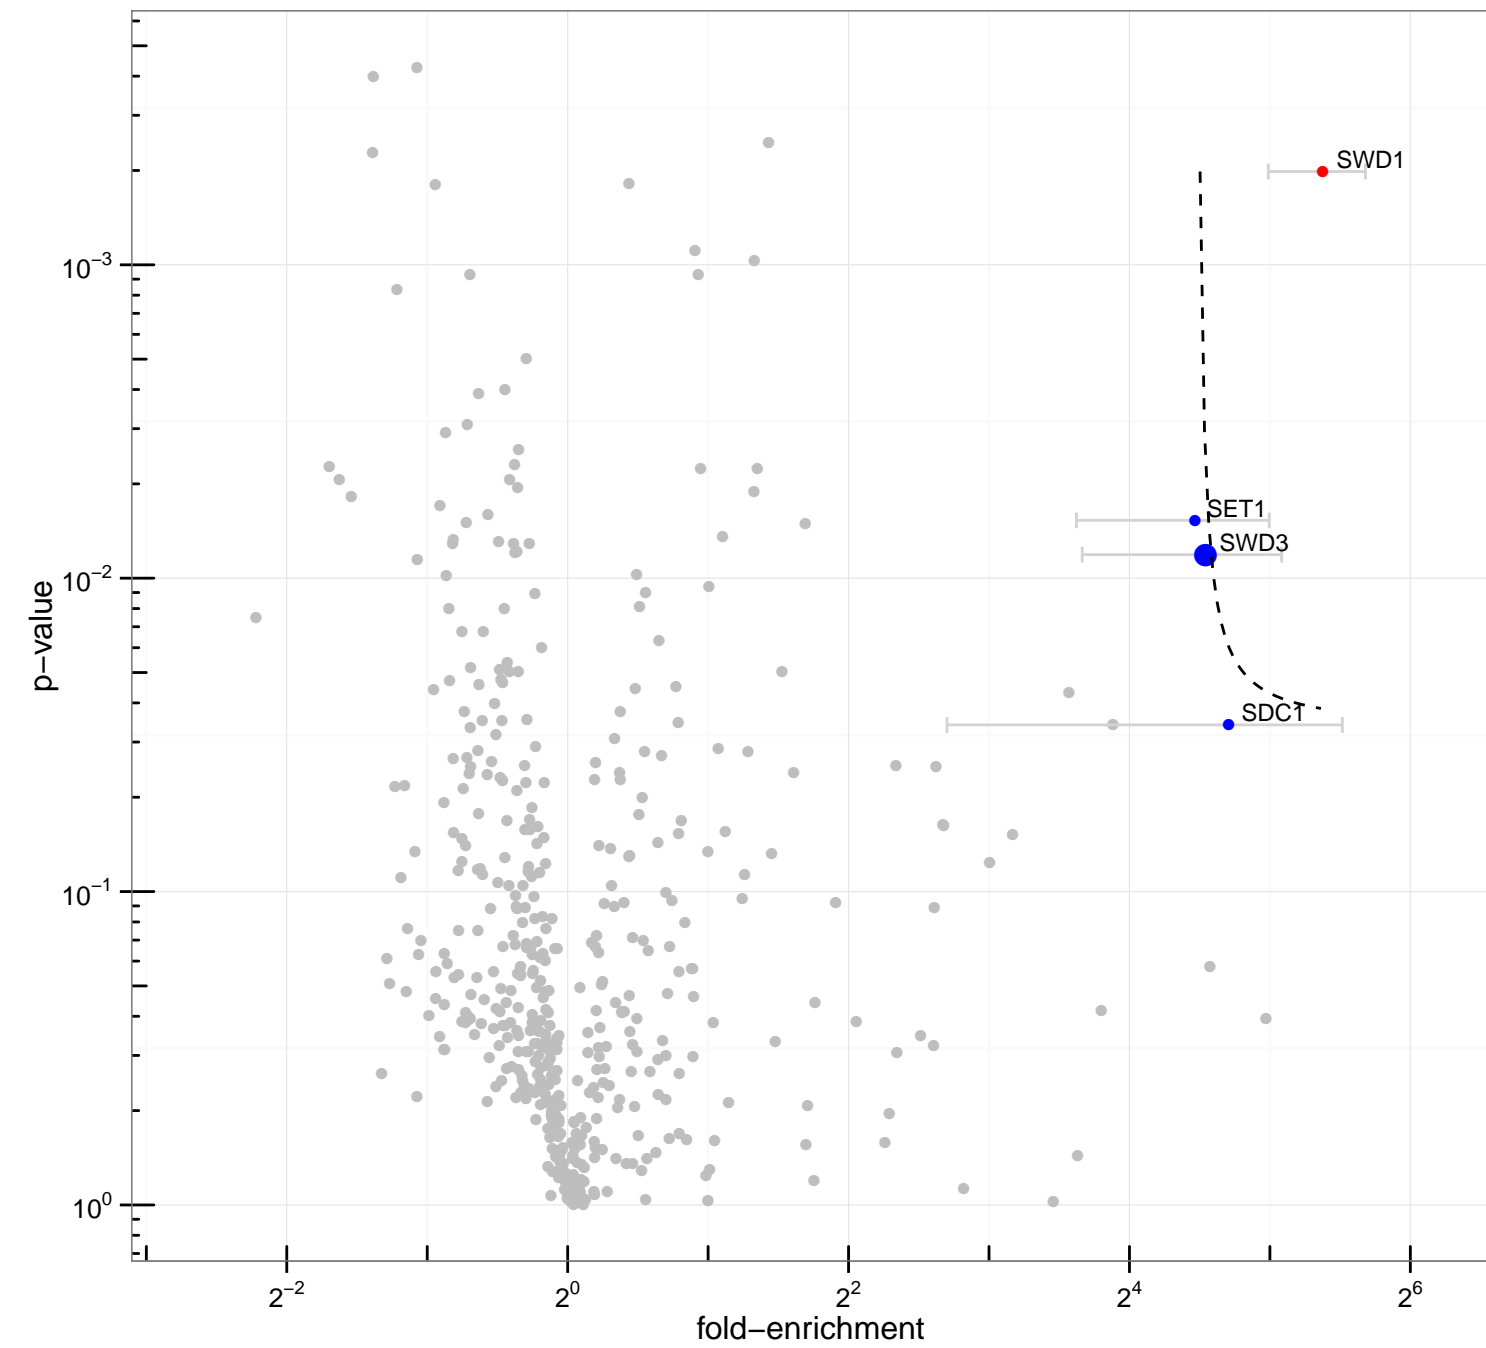

**Interactor class**

- A+
- B+

|                         | SDC1 | SET1 | SWD1 | SWD3 |
|-------------------------|------|------|------|------|
| <i>significance</i>     | 4.0  | 4.1  | 5.5  | 4.1  |
| <i>interactor class</i> | B+   | B+   | A+   | B+   |

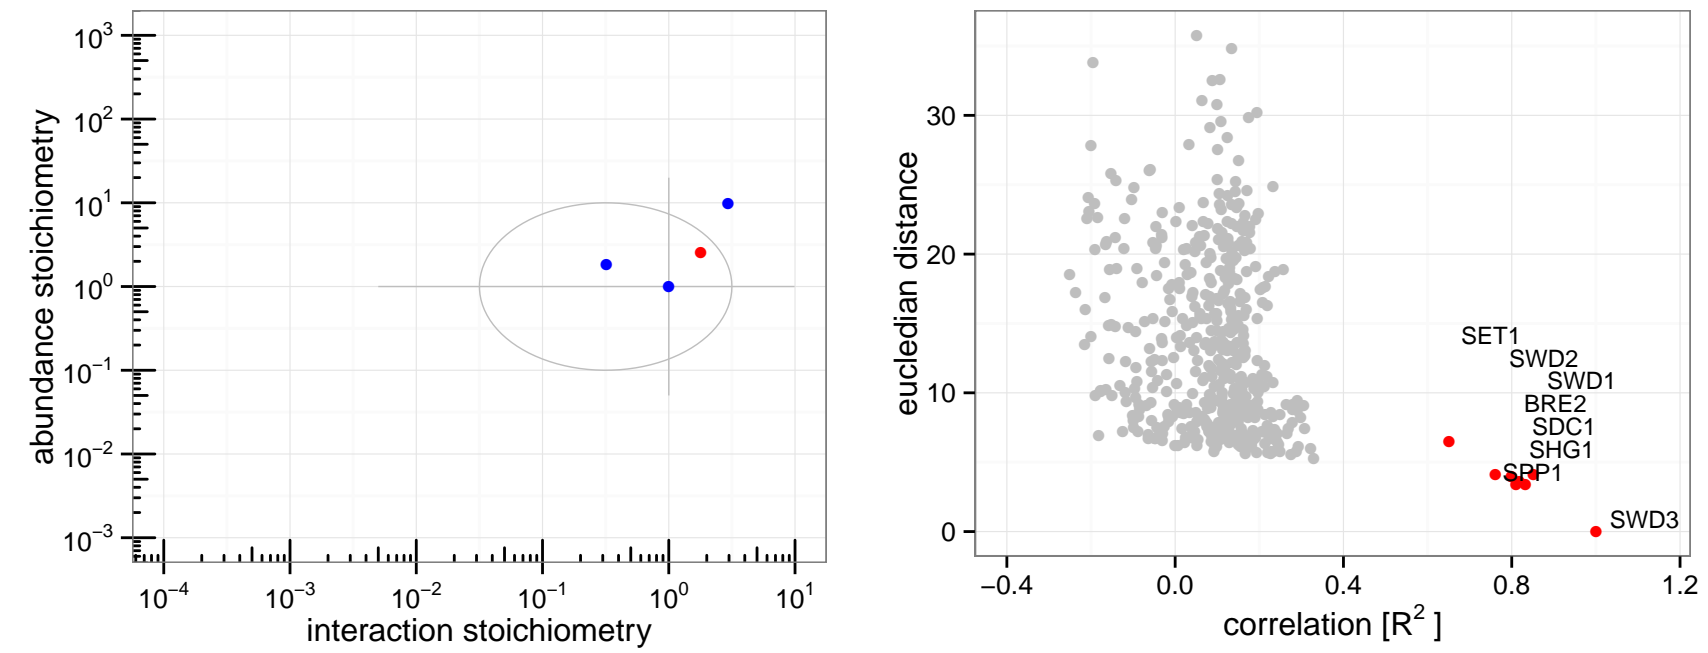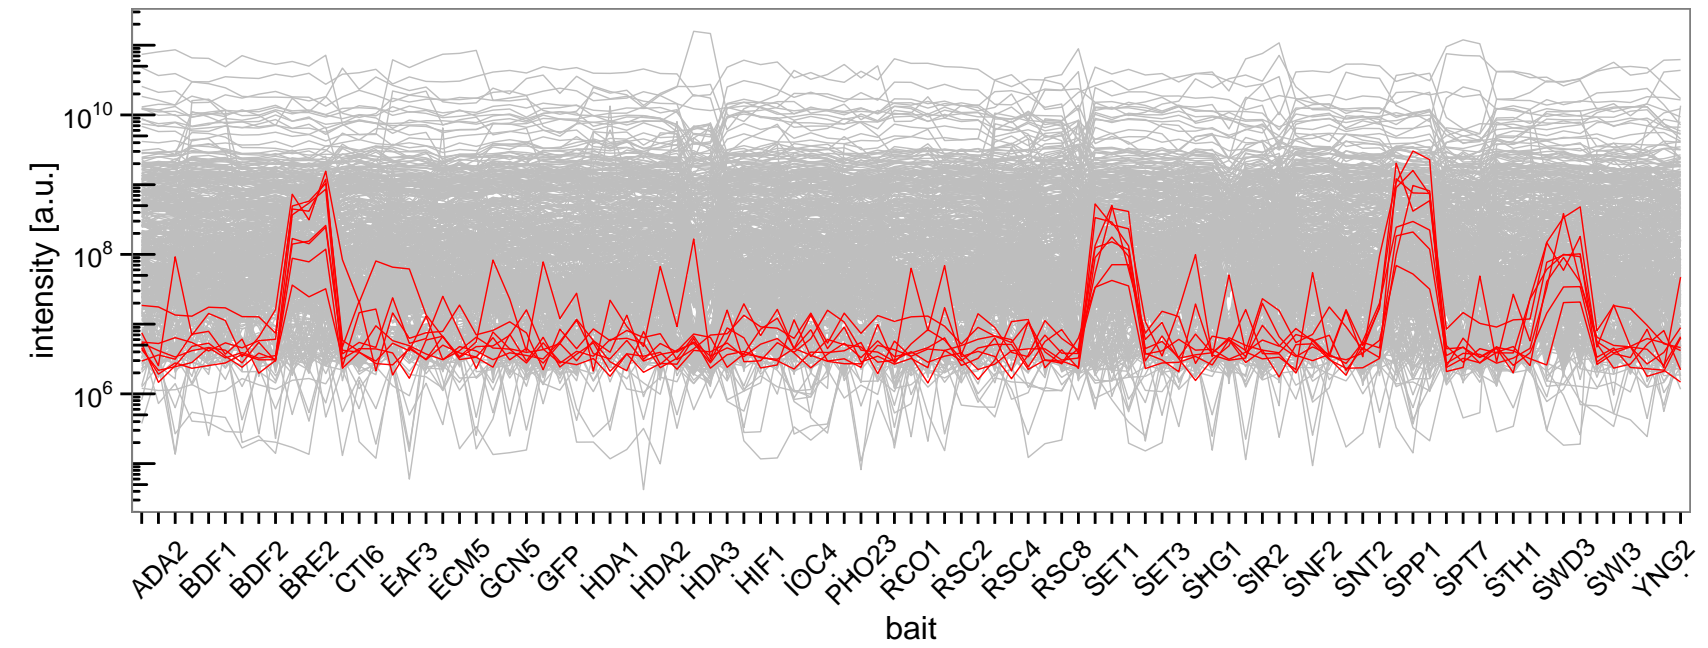

|                   |            |
|-------------------|------------|
| <b>bait</b>       | SWI3       |
| <b>experiment</b> | 14 minutes |

|                    |      |
|--------------------|------|
| <b>interactors</b> | 10   |
| <b>recovery</b>    | 64 % |

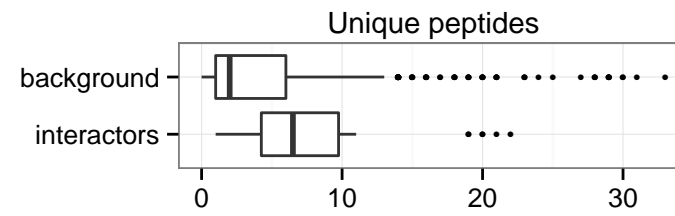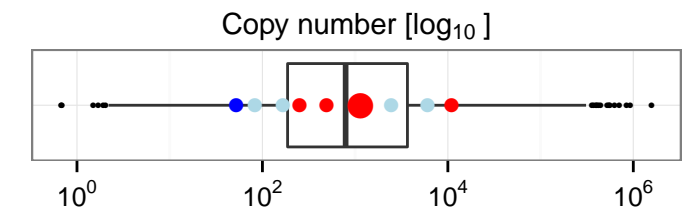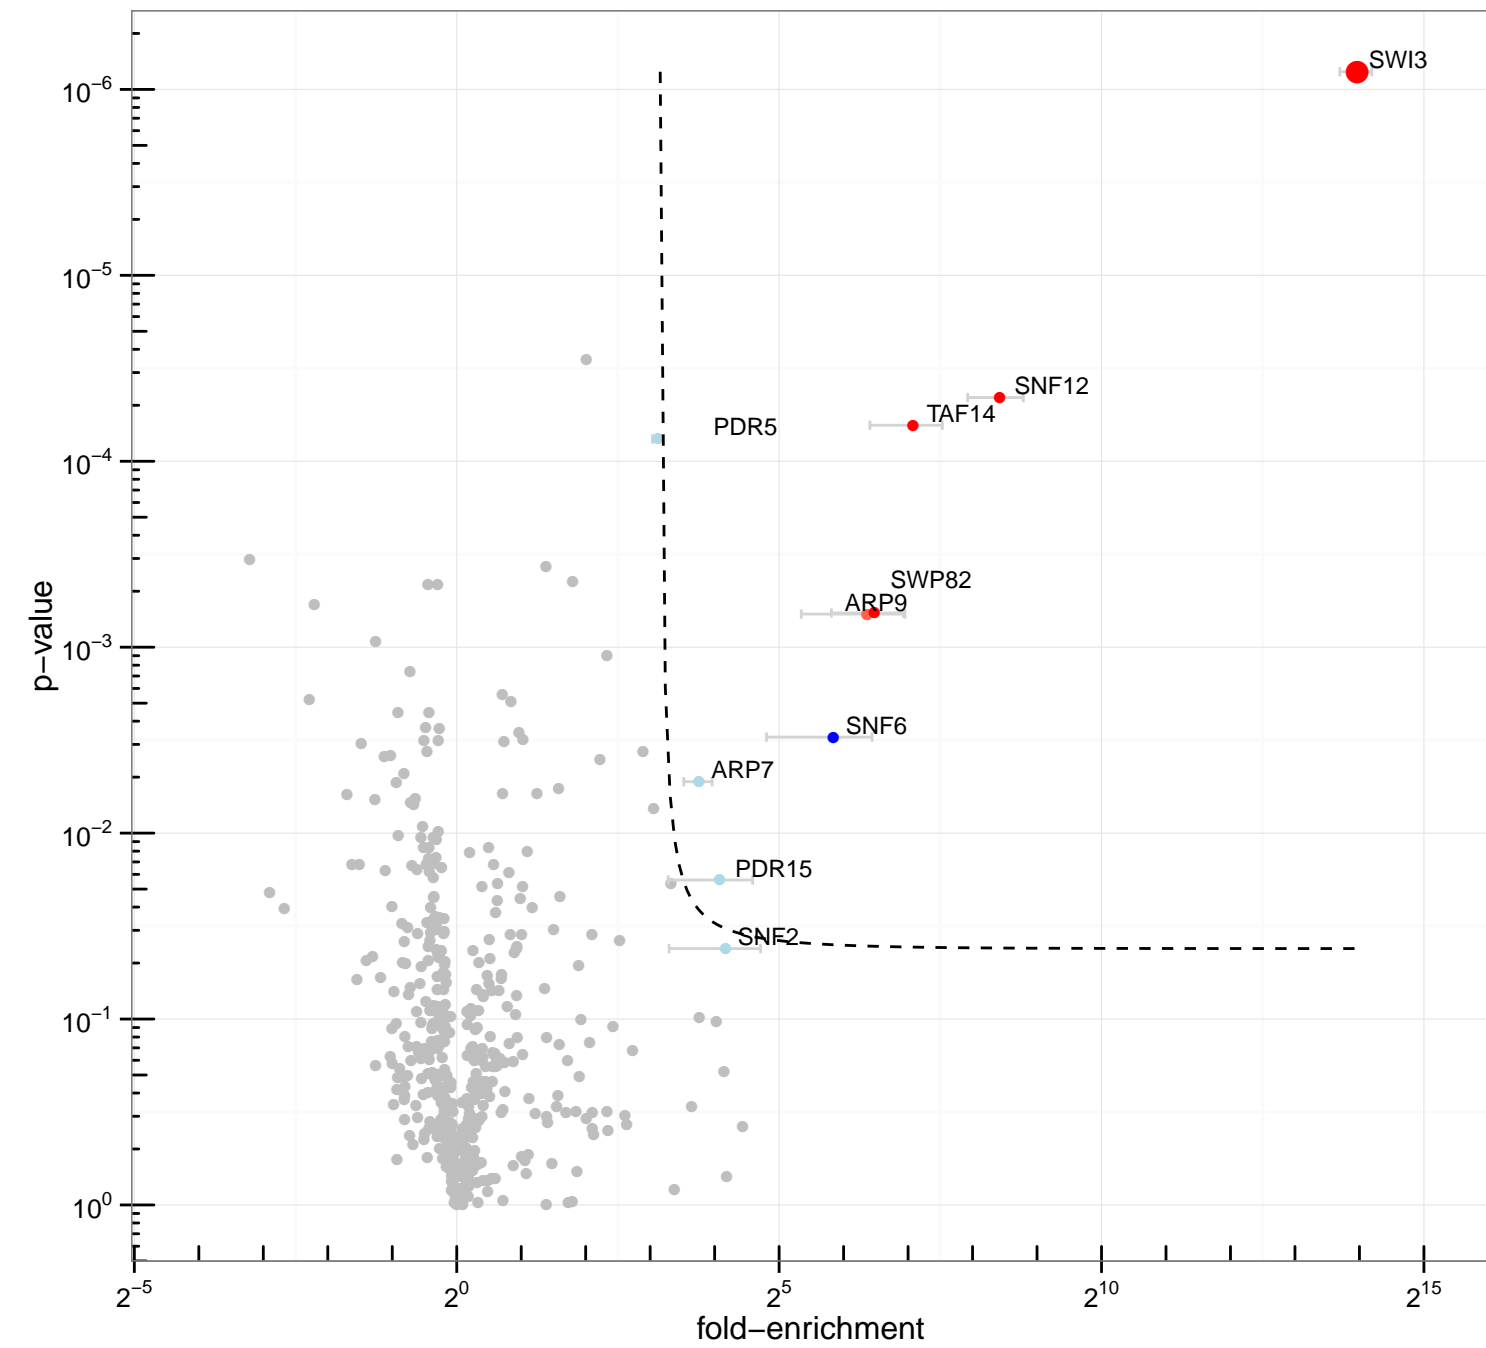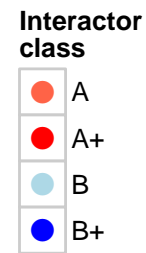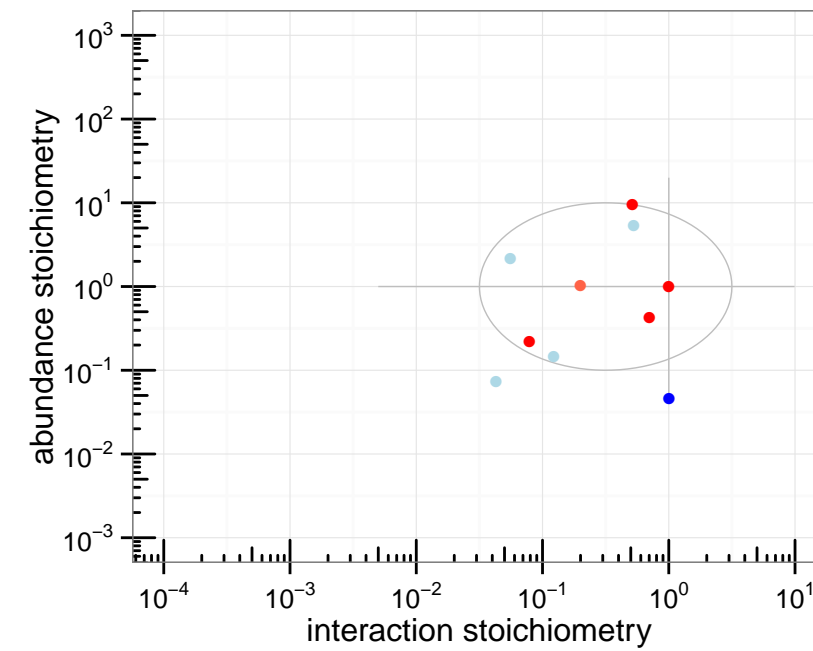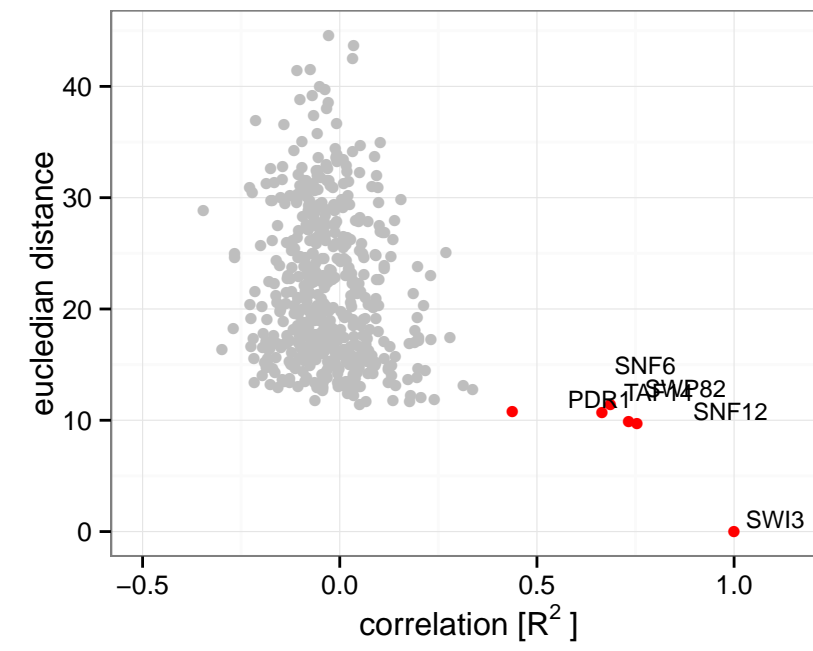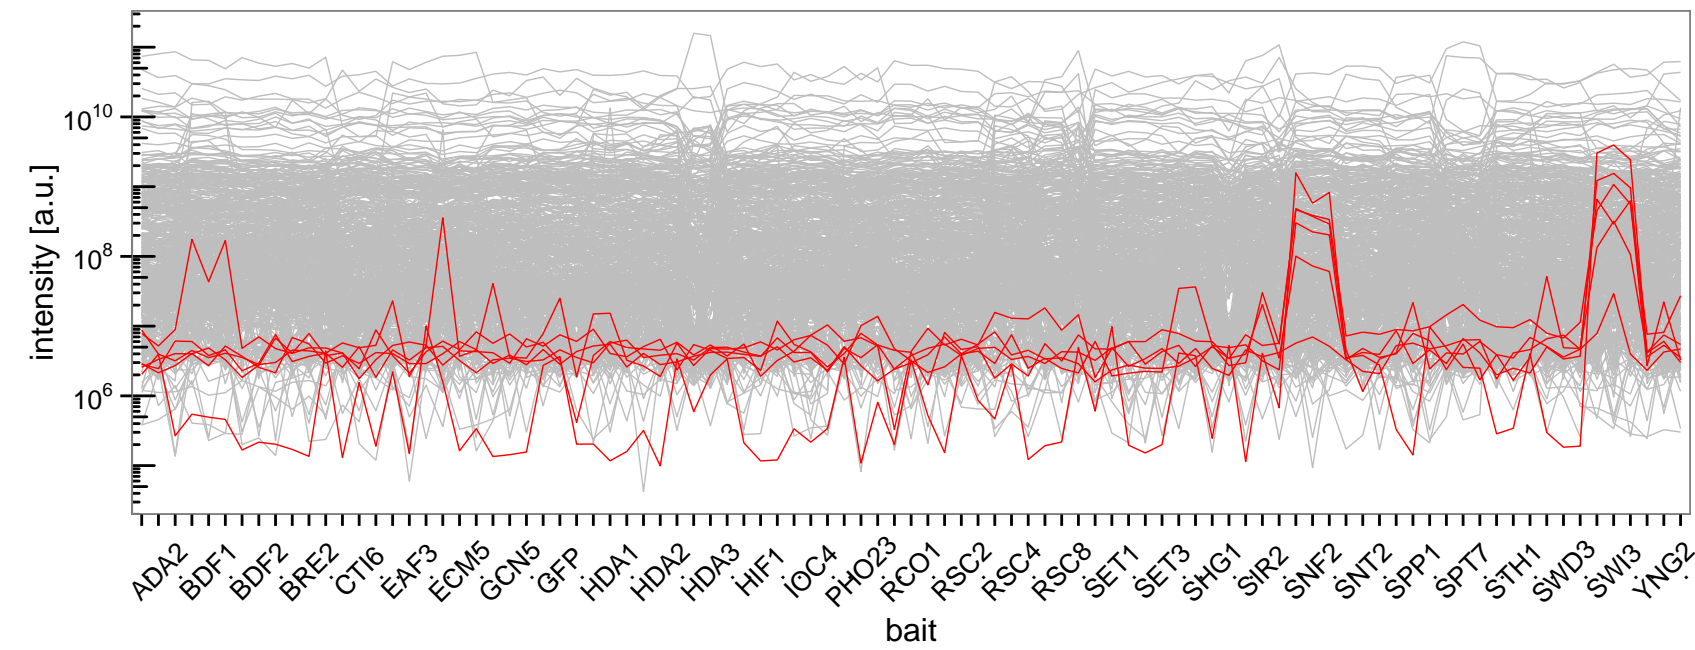

|                         | ARP9 | SNF12 | SNF6 | SWI3 | SWP82 | TAF14 |
|-------------------------|------|-------|------|------|-------|-------|
| <i>significance</i>     | 6.2  | 8.6   | 5.5  | 14.0 | 6.3   | 7.4   |
| <i>interactor class</i> | A    | A+    | B+   | A+   | A+    | A+    |



|                   |            |
|-------------------|------------|
| <b>bait</b>       | YNG2       |
| <b>experiment</b> | 14 minutes |

|                    |      |
|--------------------|------|
| <b>interactors</b> | 13   |
| <b>recovery</b>    | 54 % |

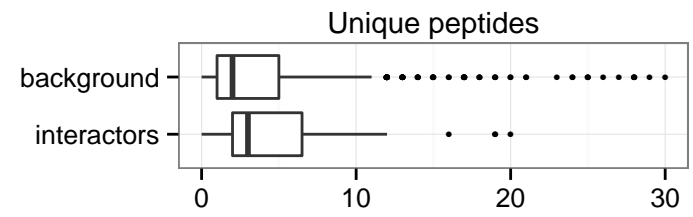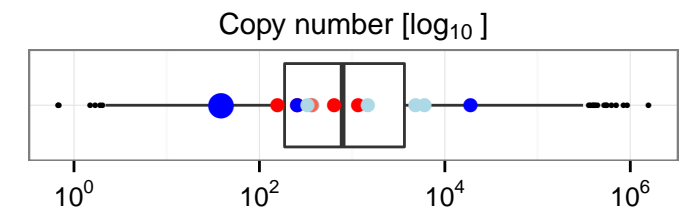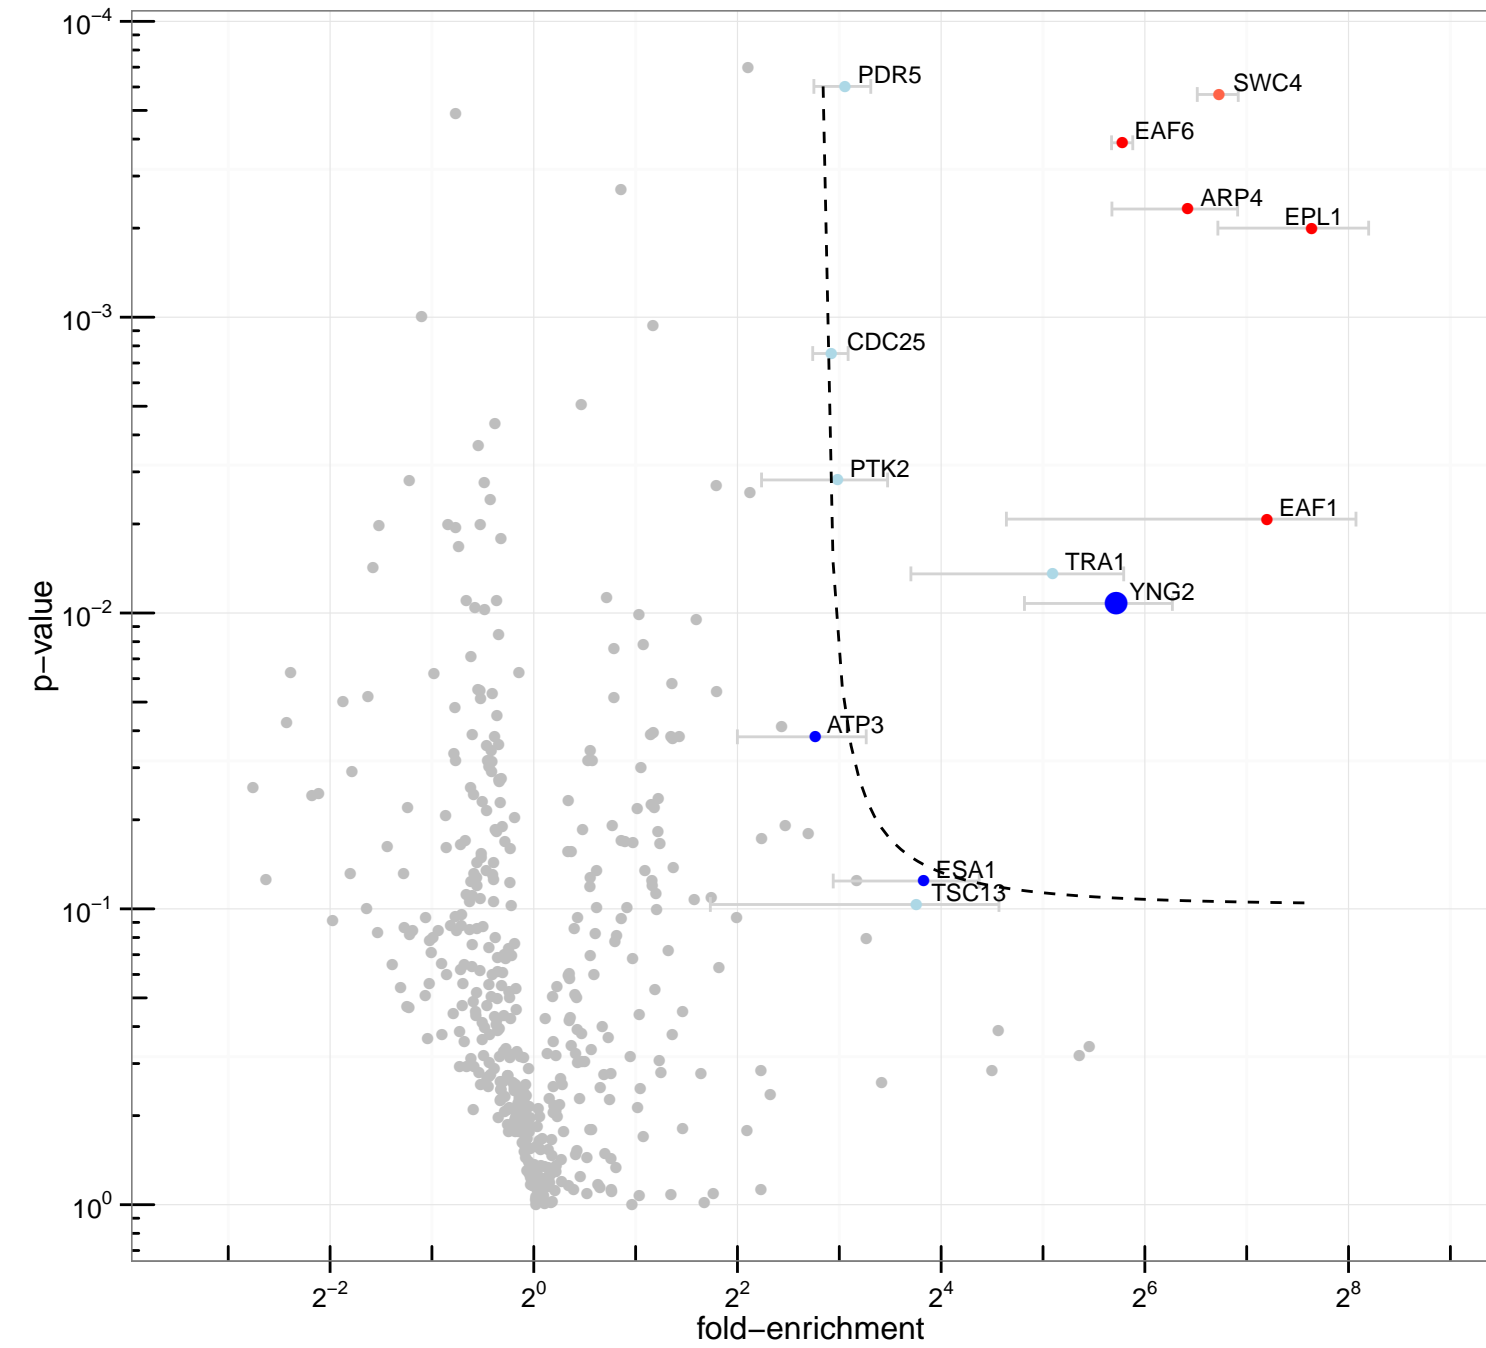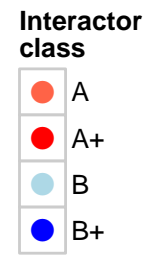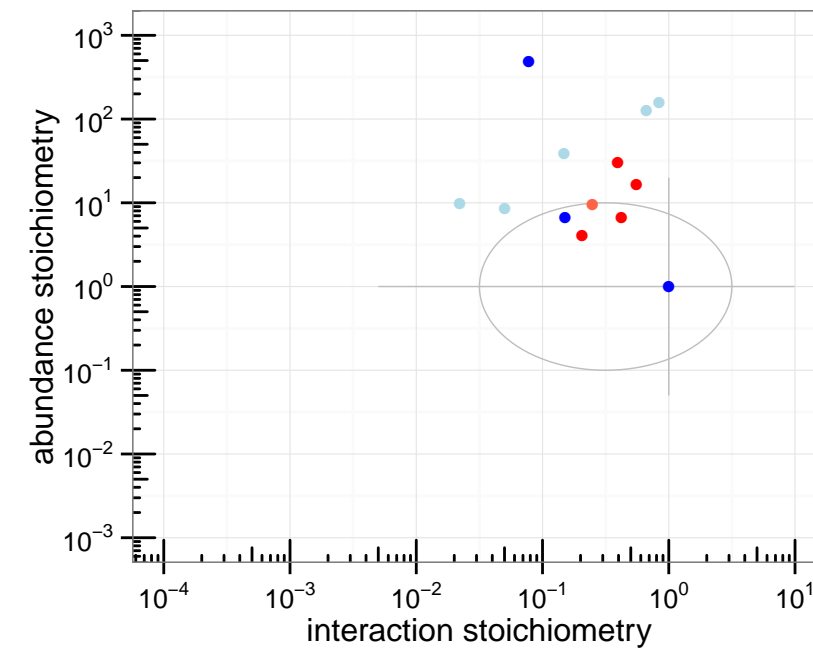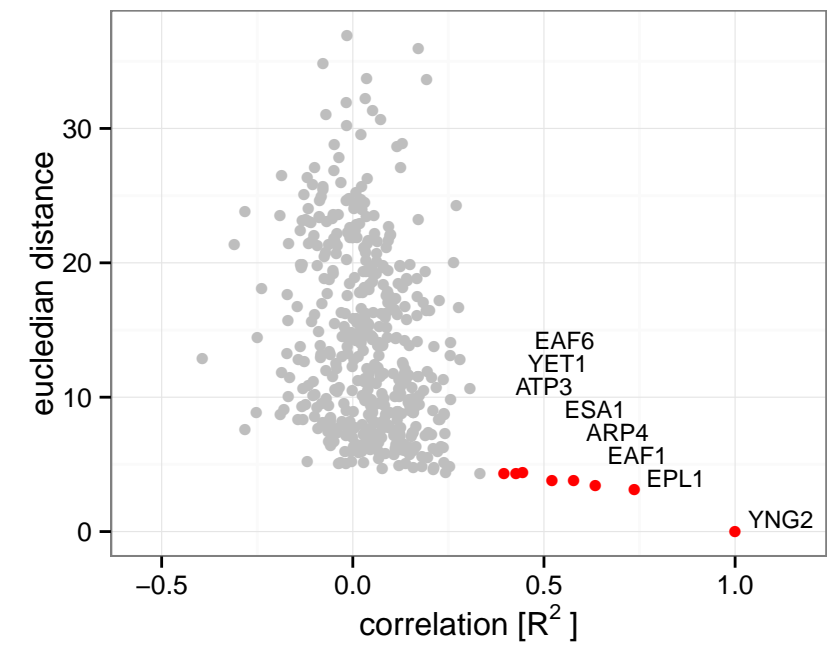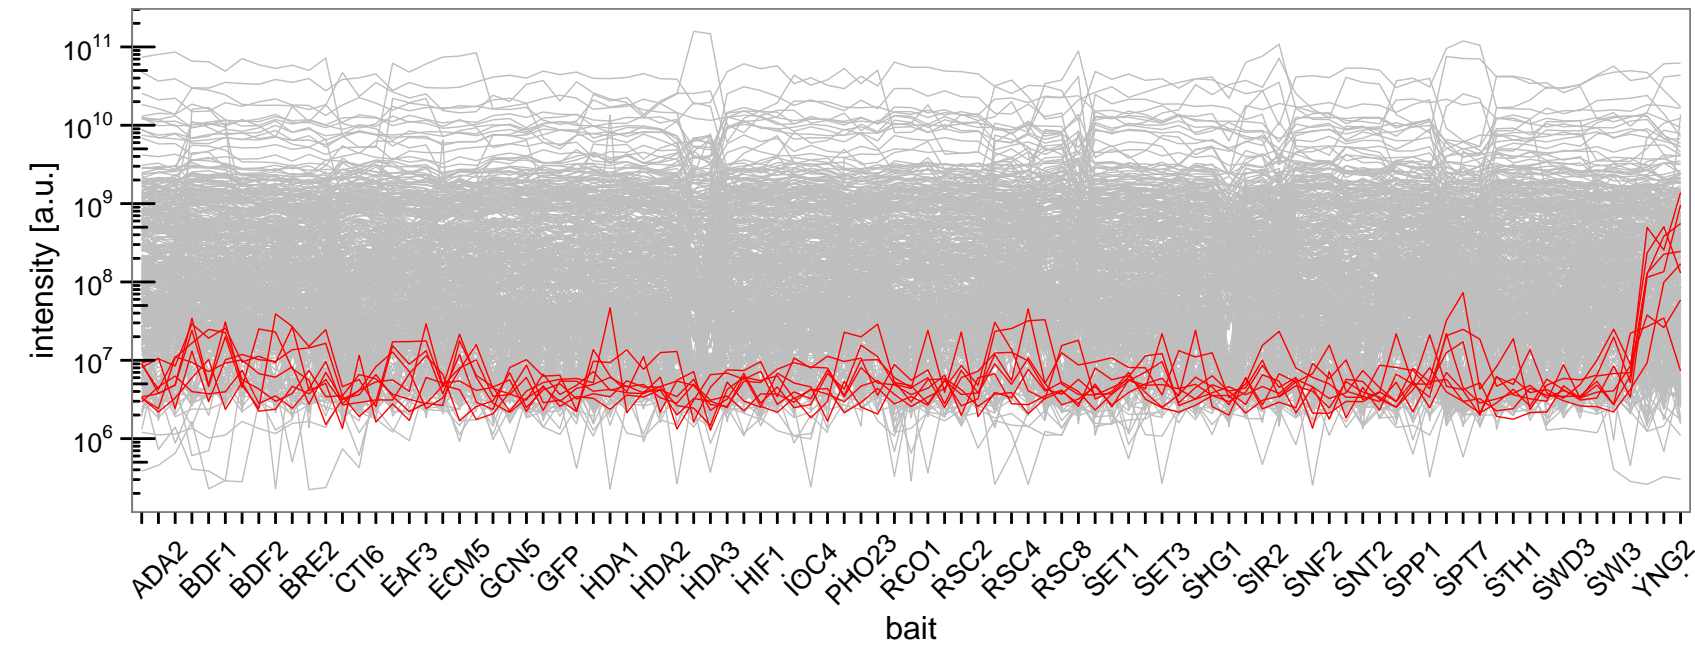

|                         | ARP4 | ATP3 | EAF1 | EAF6 | EPL1 | ESA1 | SWC4 | YNG2 |
|-------------------------|------|------|------|------|------|------|------|------|
| <i>significance</i>     | 6.4  | 2.4  | 6.6  | 6.0  | 7.4  | 3.0  | 6.8  | 5.1  |
| <i>interactor class</i> | A+   | B+   | A+   | A+   | A+   | B+   | A    | B+   |
