# Supplementary material for: A Double-Barrel Liquid Chromatography-Tandem Mass Spectrometry (LC-MS/MS) System to Quantify 96 Interactomes per Day
Source: PubMed Central journal article supplement (PMC4587330; doi:10.1074/mcp.o115.049460), 2015-04-17
Supplement: supp_O115.049460_mcp.O115.049460-3.pdf [file supp_O115.049460_mcp.O115.049460-3.pdf]

## **Ultra-high Throughput LC-MS/MS Protein Interaction Analysis – Processing 96 Pull-downs in a Single Day**

**Experiment: 27 minutes**

**F. Hosp\*, R.A. Scheltema\*, H.C. Eberl\*, N.A. Kulak\*, E.C. Keilhauer, K. Mayr and M. Mann**

# Missing values

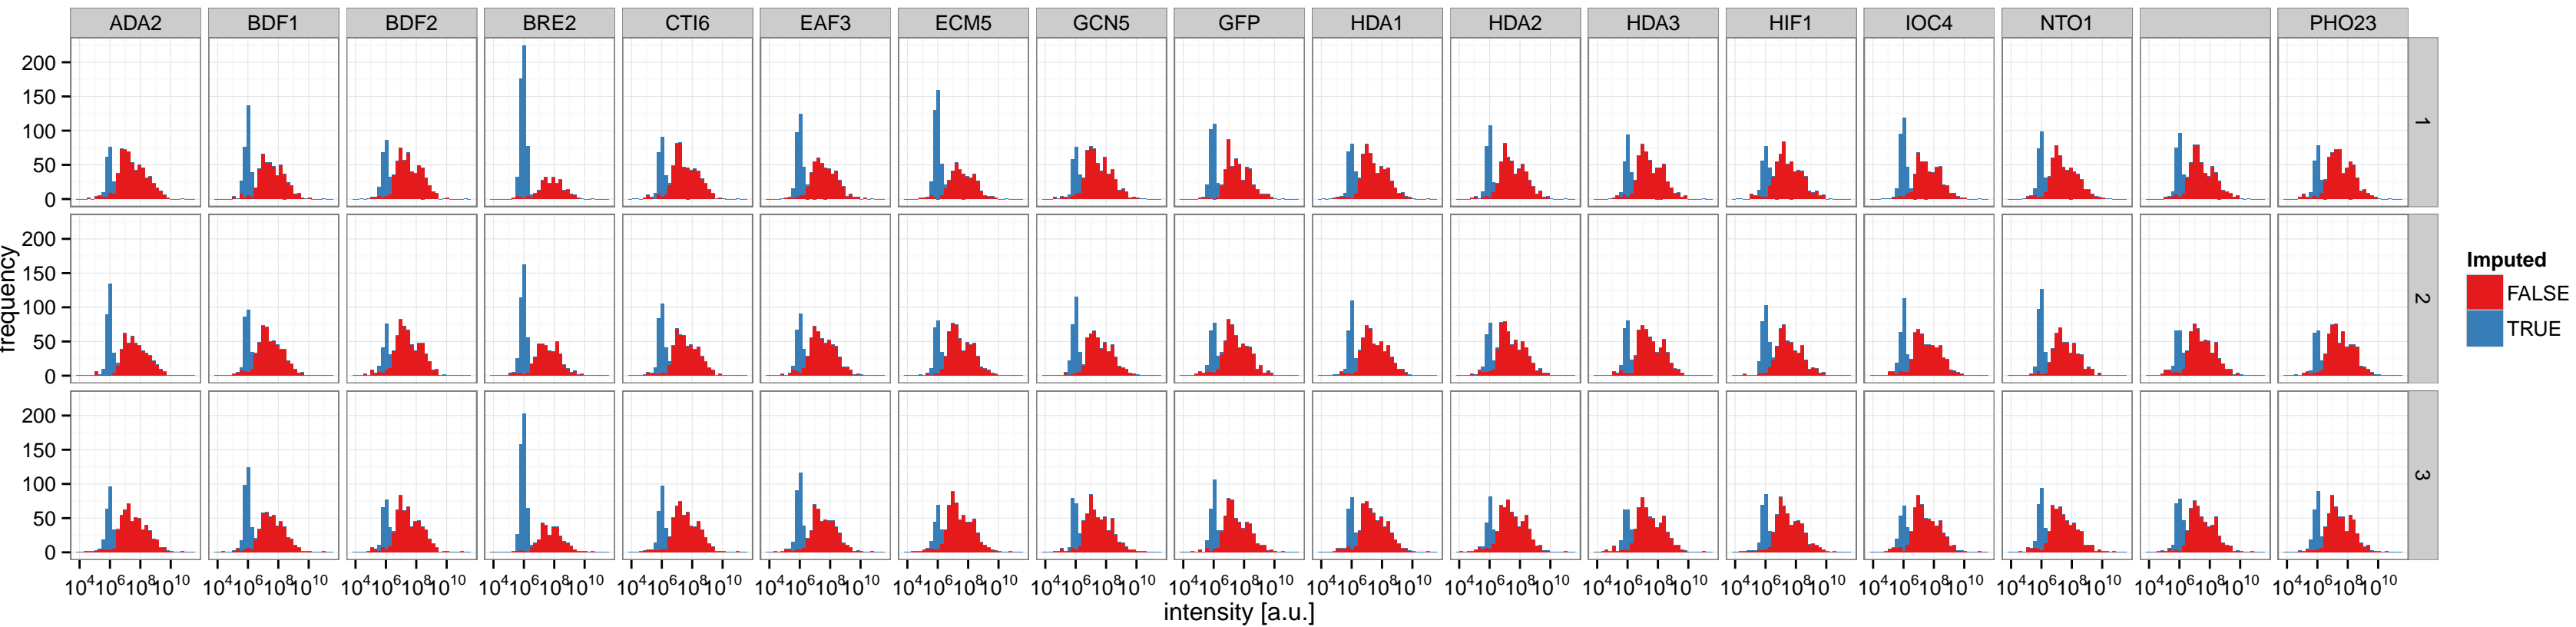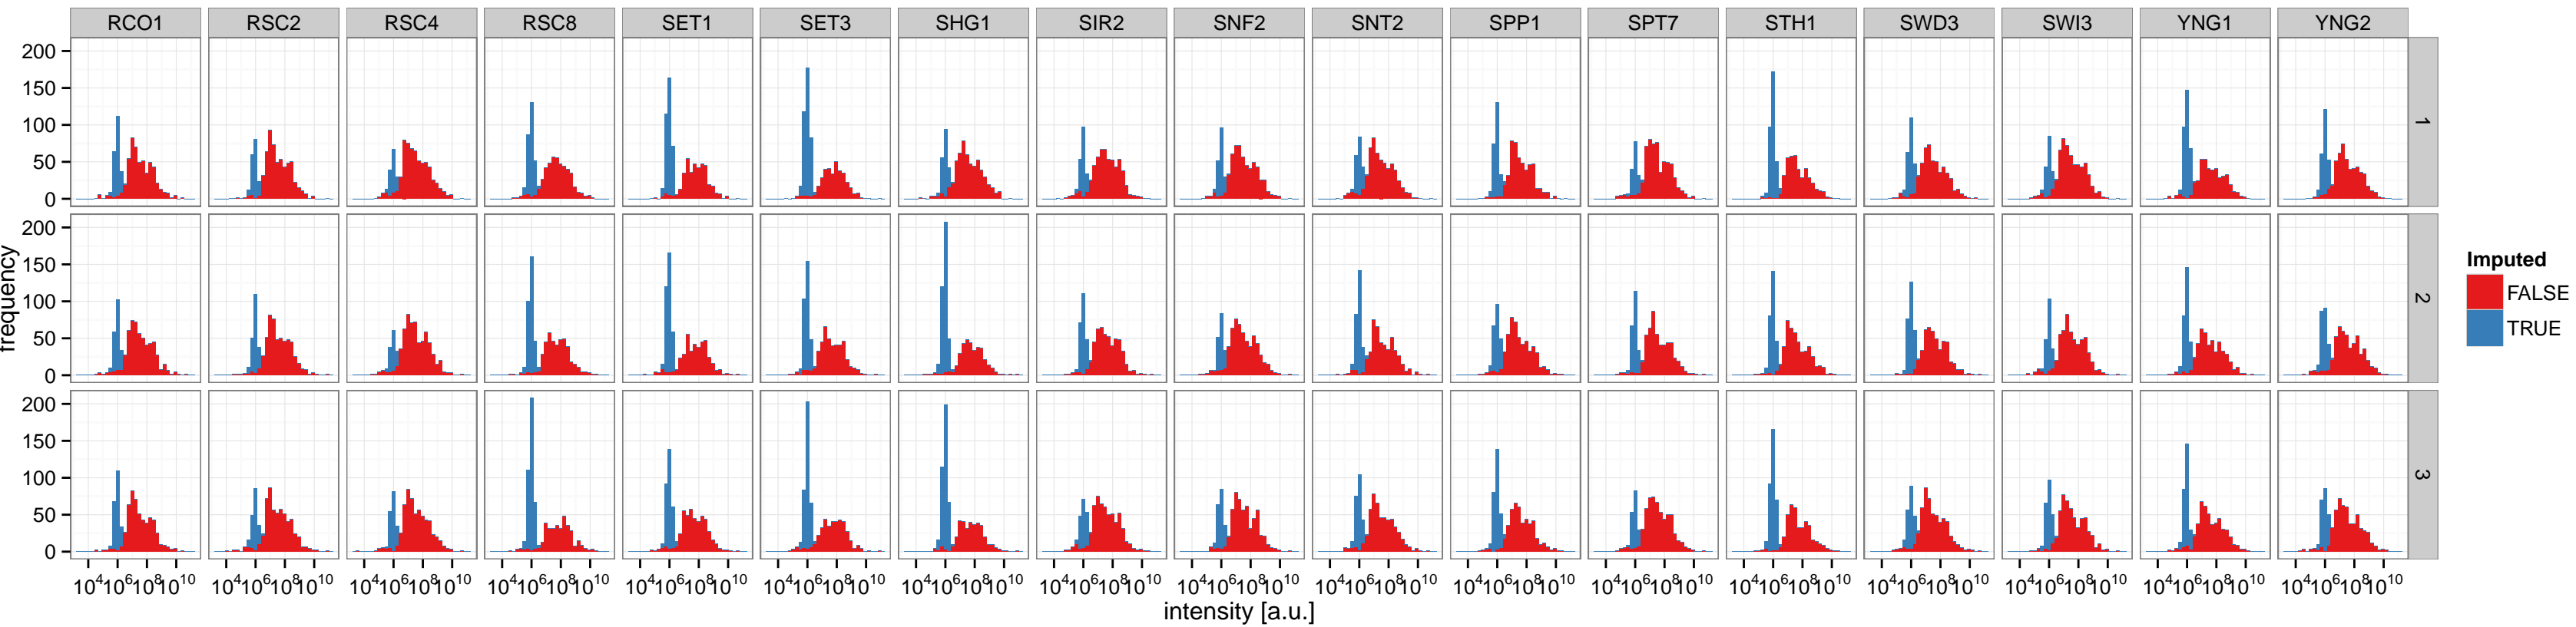



|                   |            |
|-------------------|------------|
| <b>bait</b>       | BDF1       |
| <b>experiment</b> | 27 minutes |

|                    |     |
|--------------------|-----|
| <b>interactors</b> | 5   |
| <b>recovery</b>    | 0 % |

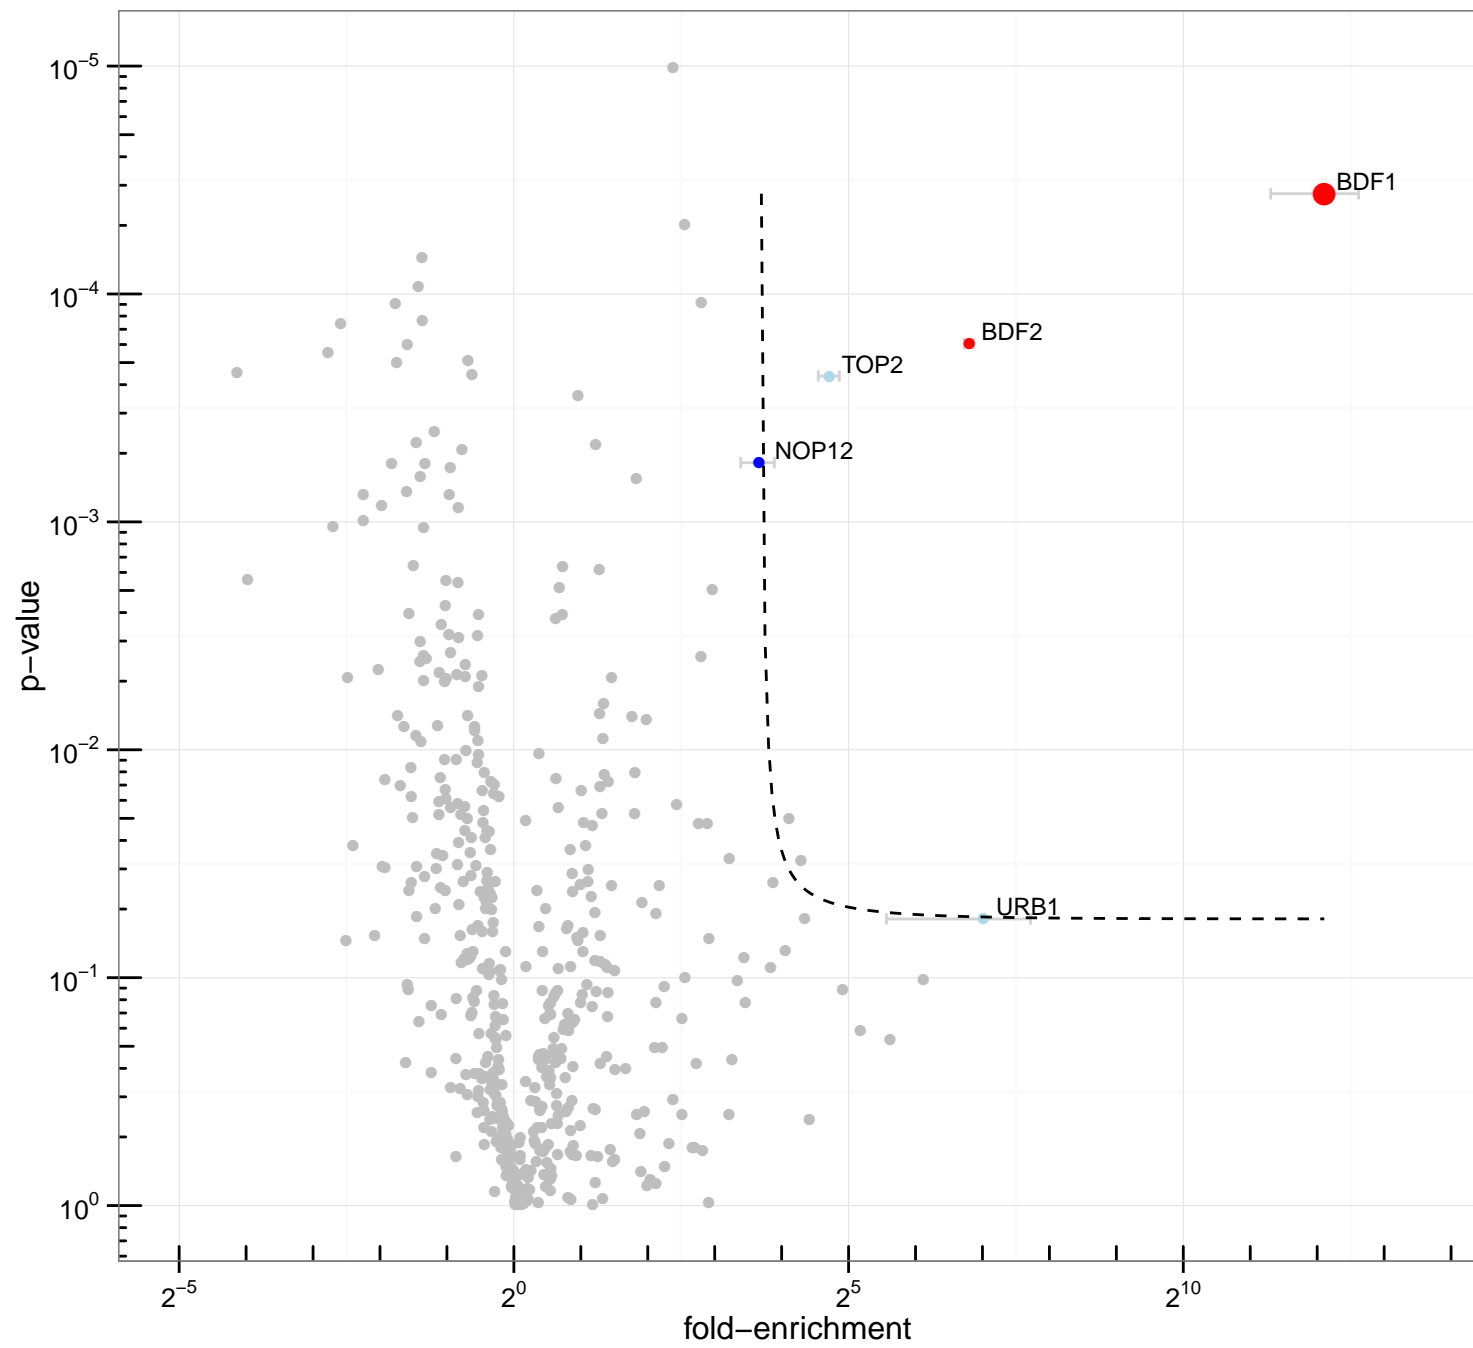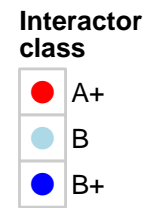

|                         | BDF1 | BDF2 | NOP12 |
|-------------------------|------|------|-------|
| <i>significance</i>     | 12.0 | 6.9  | 4.2   |
| <i>interactor class</i> | A+   | A+   | B+    |

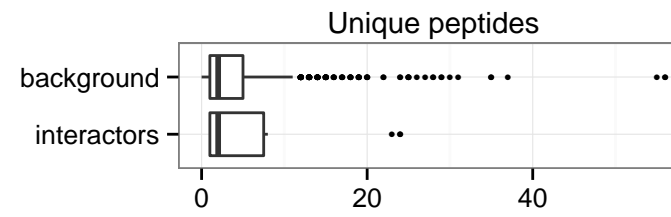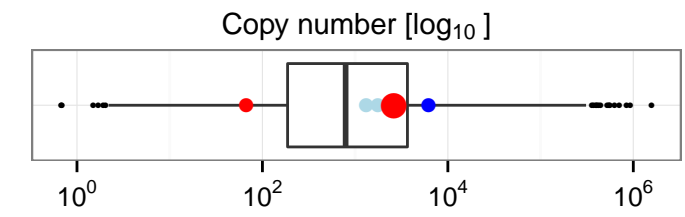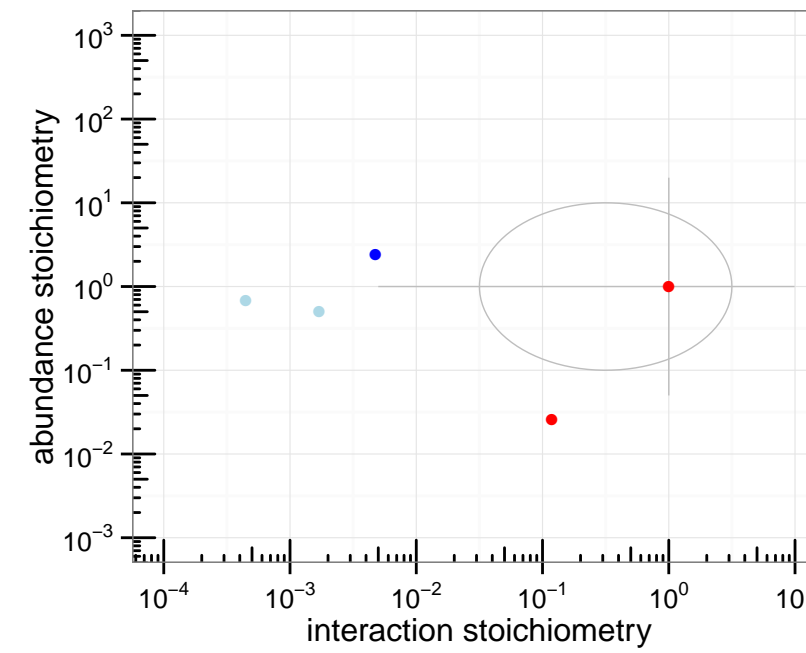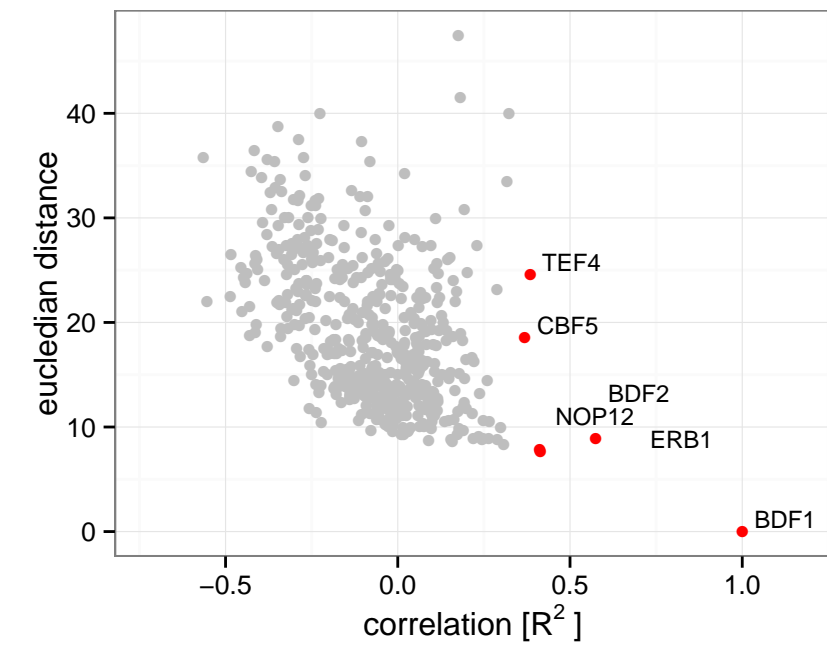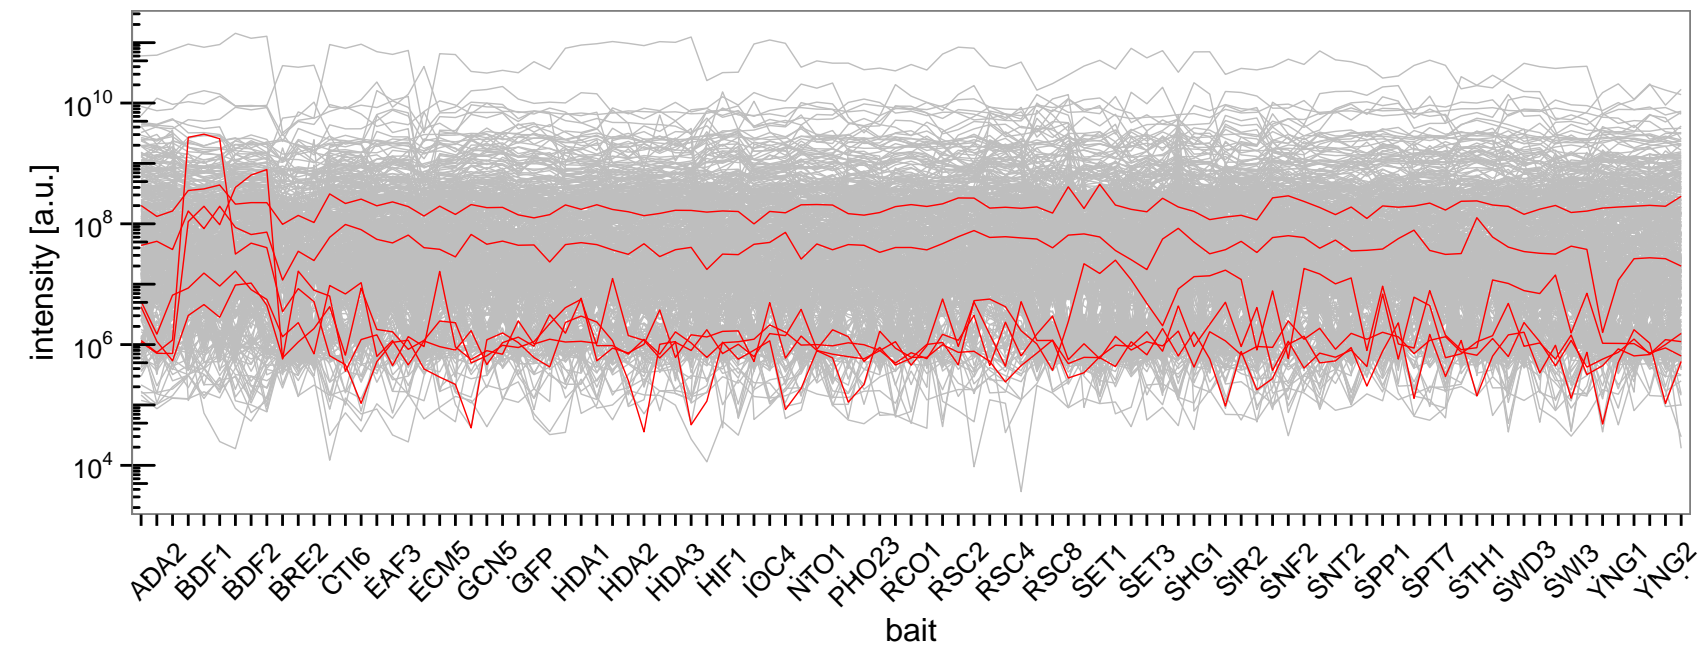



|                   |            |
|-------------------|------------|
| <b>bait</b>       | BDF2       |
| <b>experiment</b> | 27 minutes |

|                    |     |
|--------------------|-----|
| <b>interactors</b> | 18  |
| <b>recovery</b>    | 0 % |

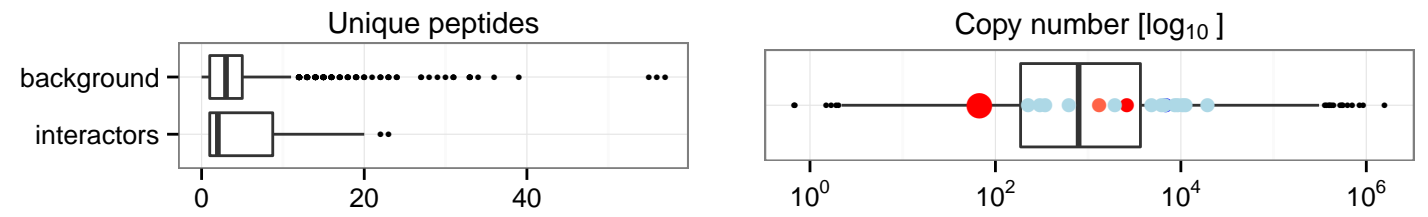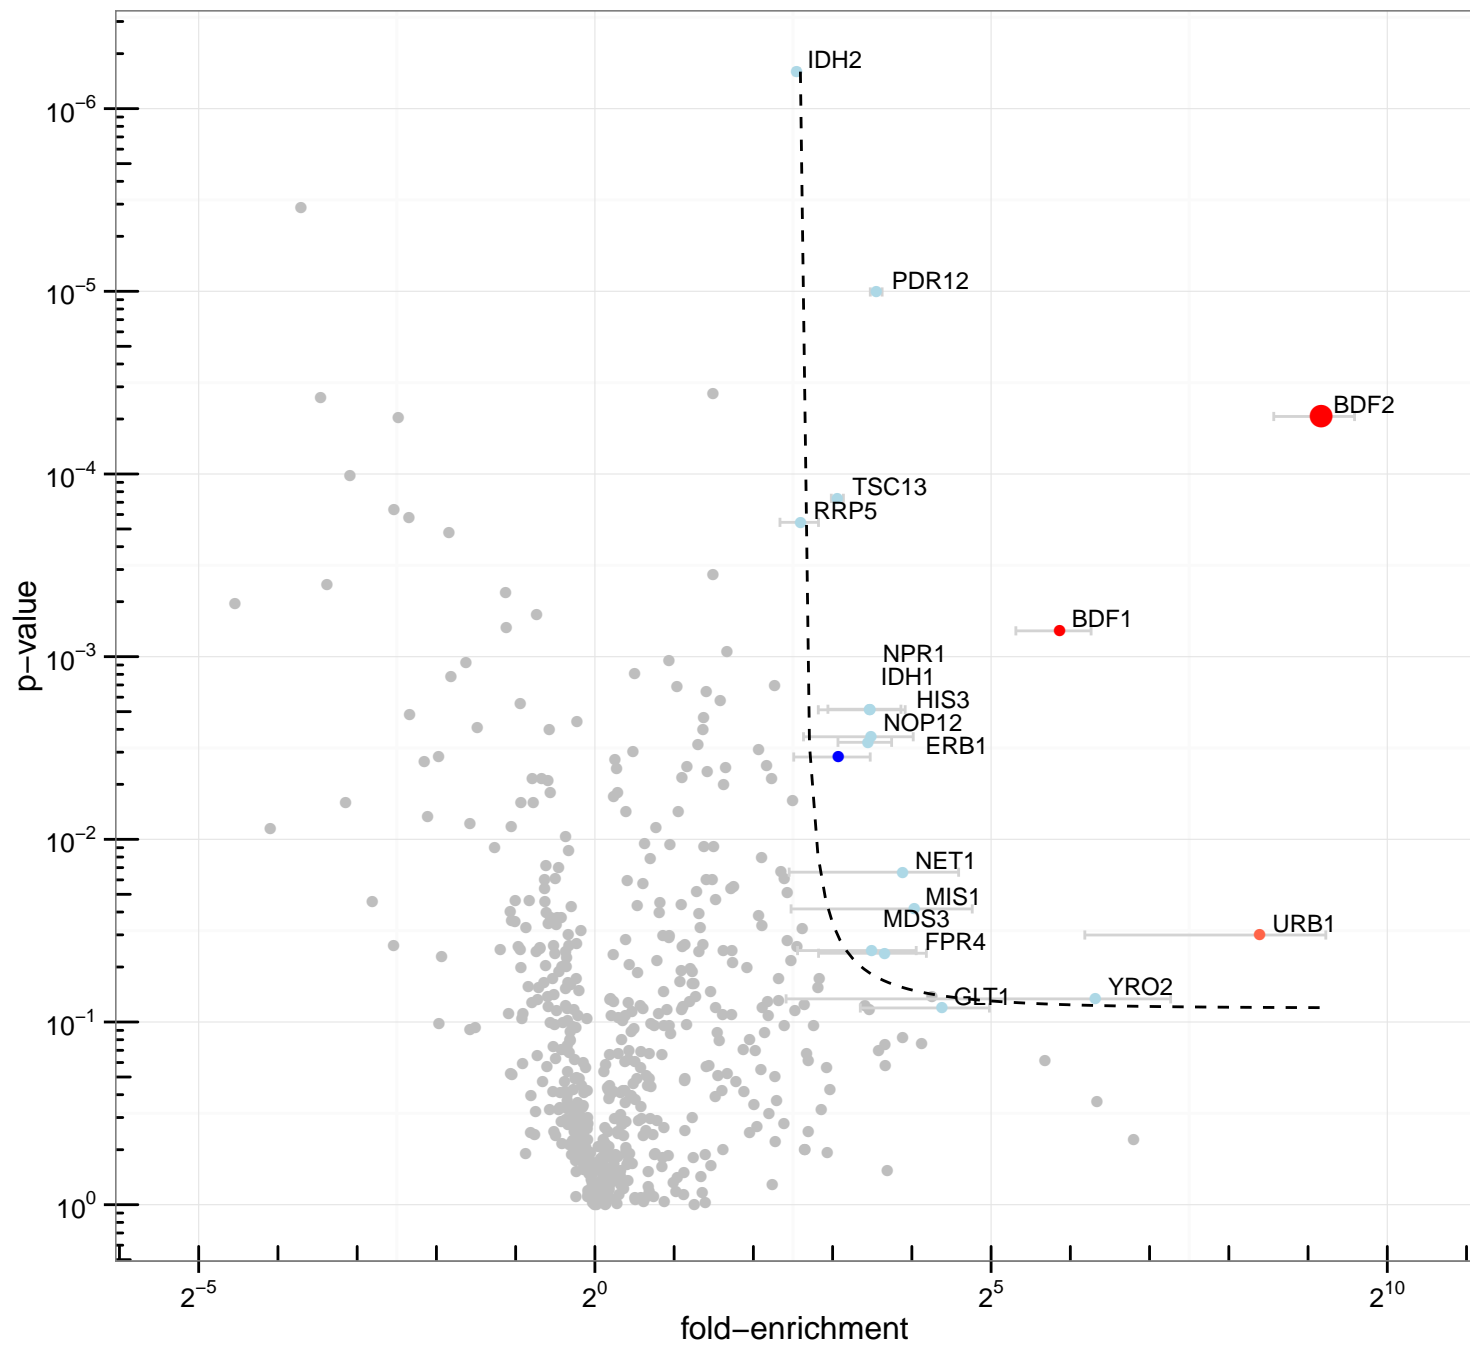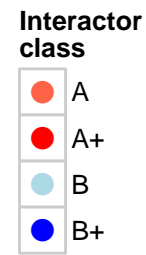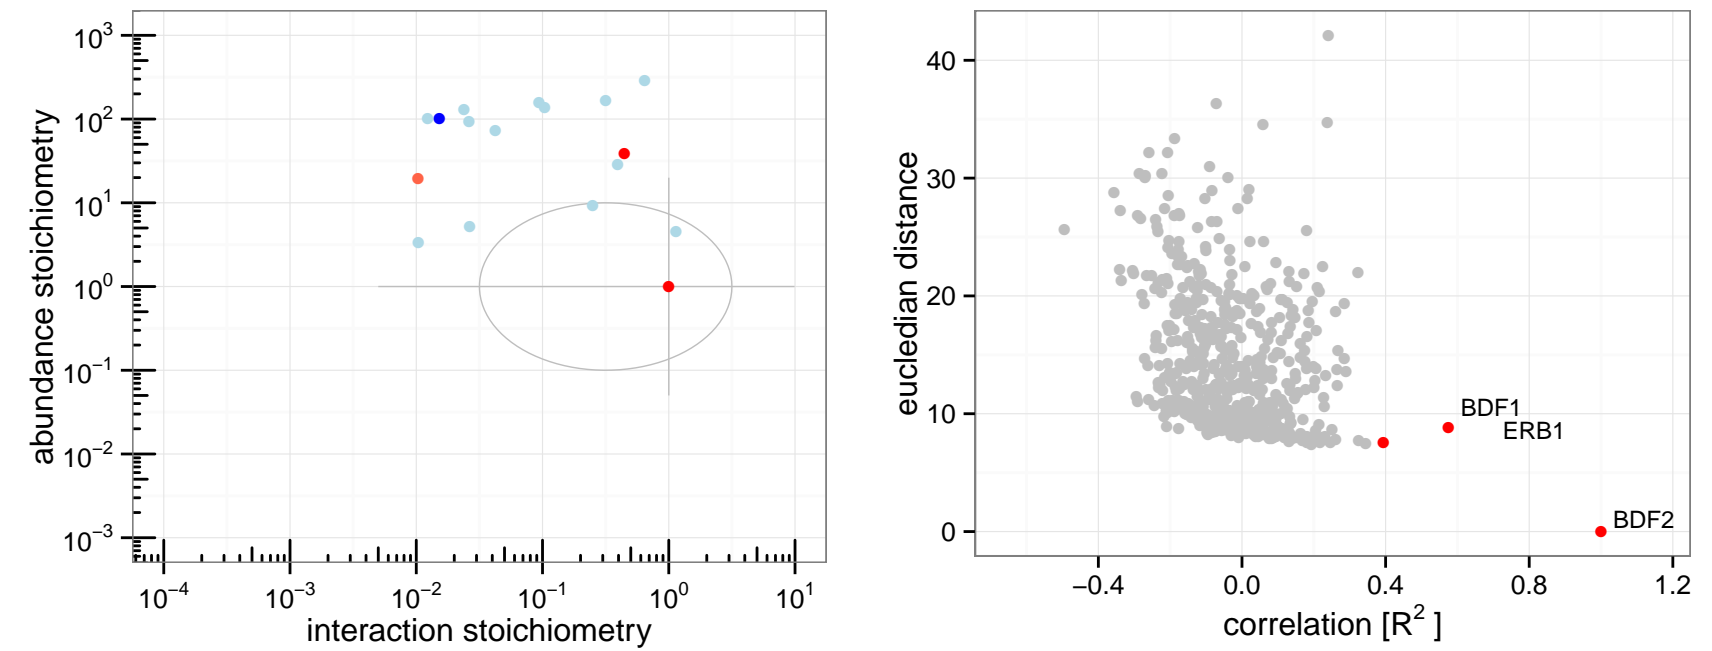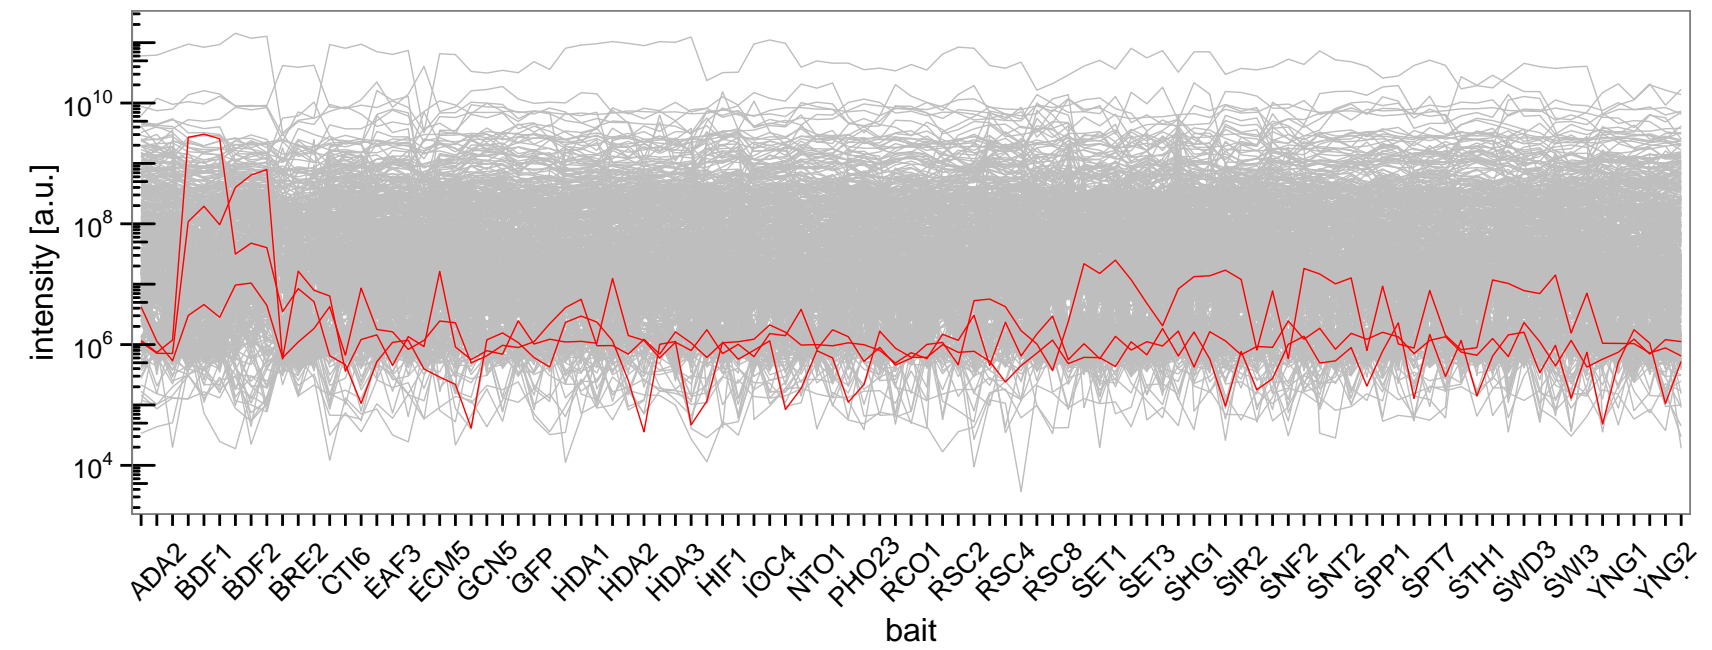

|                         | BDF1 | BDF2 | ERB1 | URB1 |
|-------------------------|------|------|------|------|
| <i>significance</i>     | 5.8  | 9.2  | 3.2  | 7.5  |
| <i>interactor class</i> | A+   | A+   | B+   | A    |

|                   |            |
|-------------------|------------|
| <b>bait</b>       | BRE2       |
| <b>experiment</b> | 27 minutes |

|                    |     |
|--------------------|-----|
| <b>interactors</b> | 8   |
| <b>recovery</b>    | 0 % |

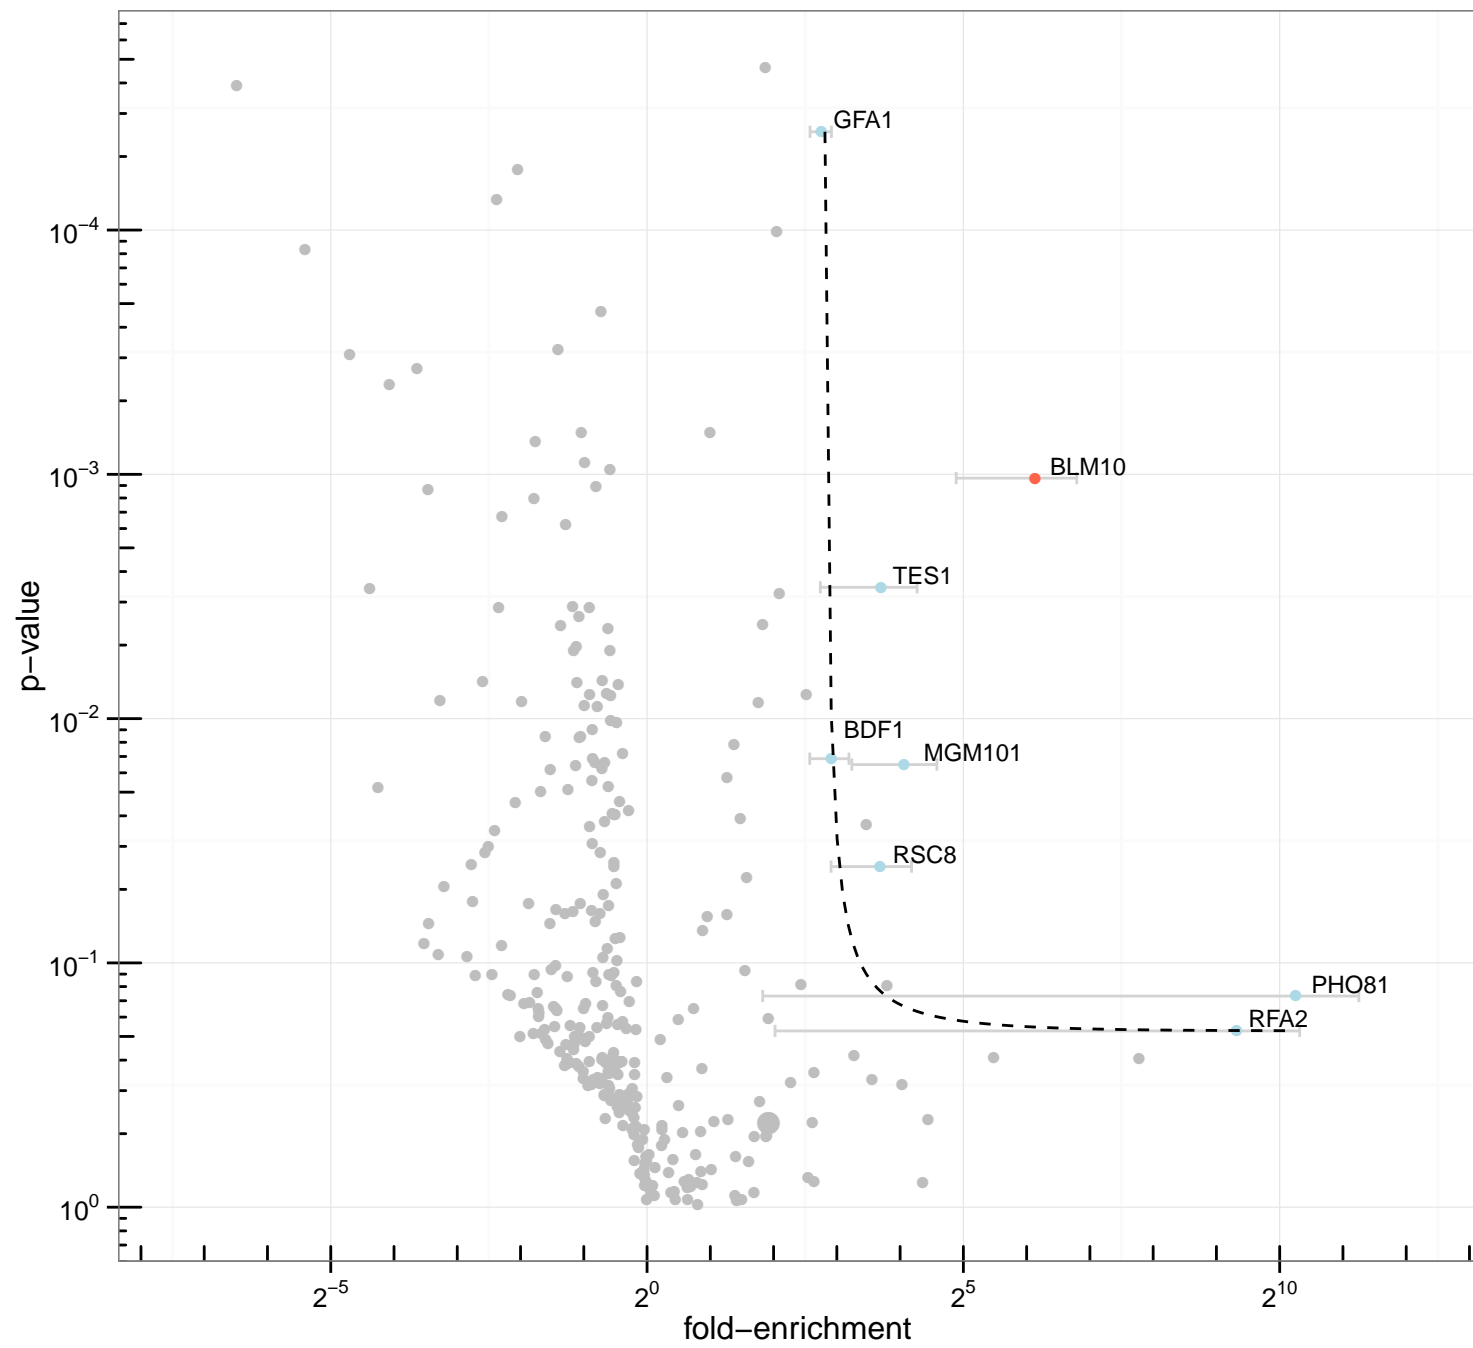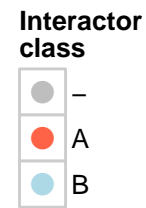

|                         |              |
|-------------------------|--------------|
|                         | <b>BLM10</b> |
| <i>significance</i>     | 5.9          |
| <i>interactor class</i> | A            |

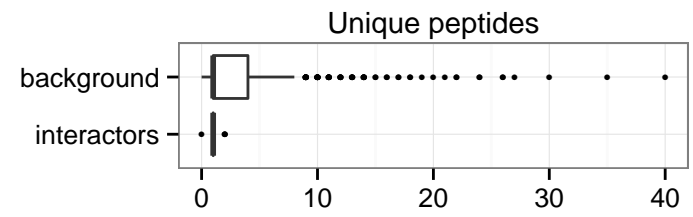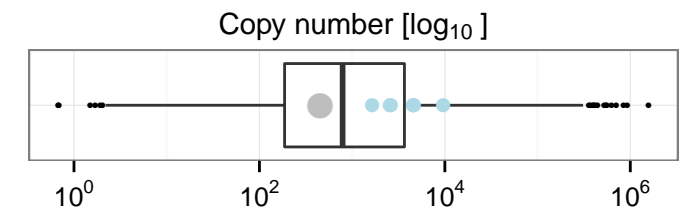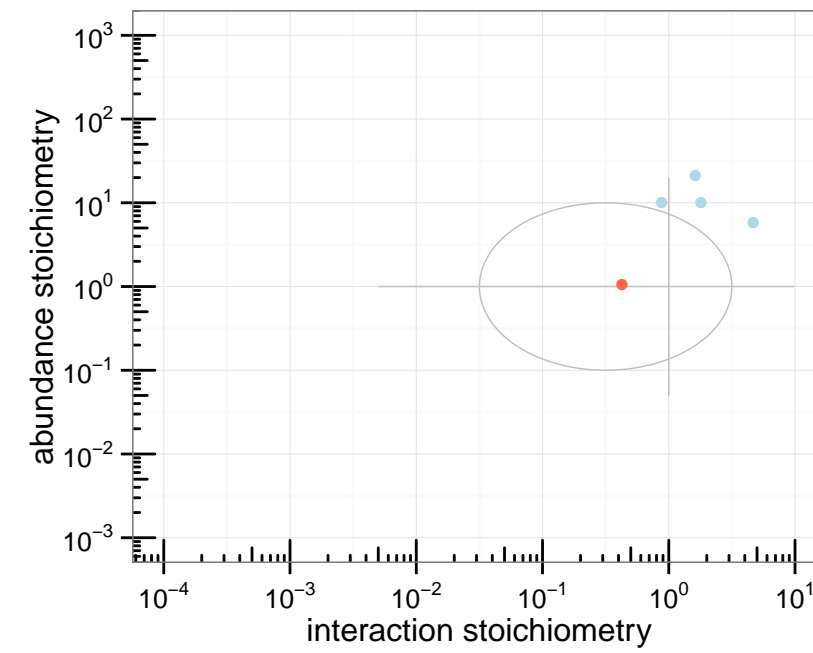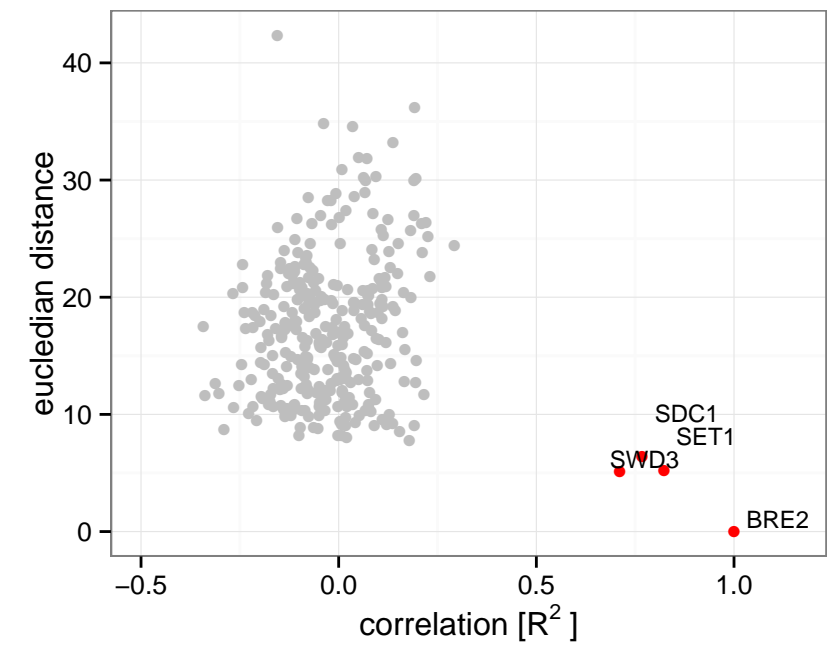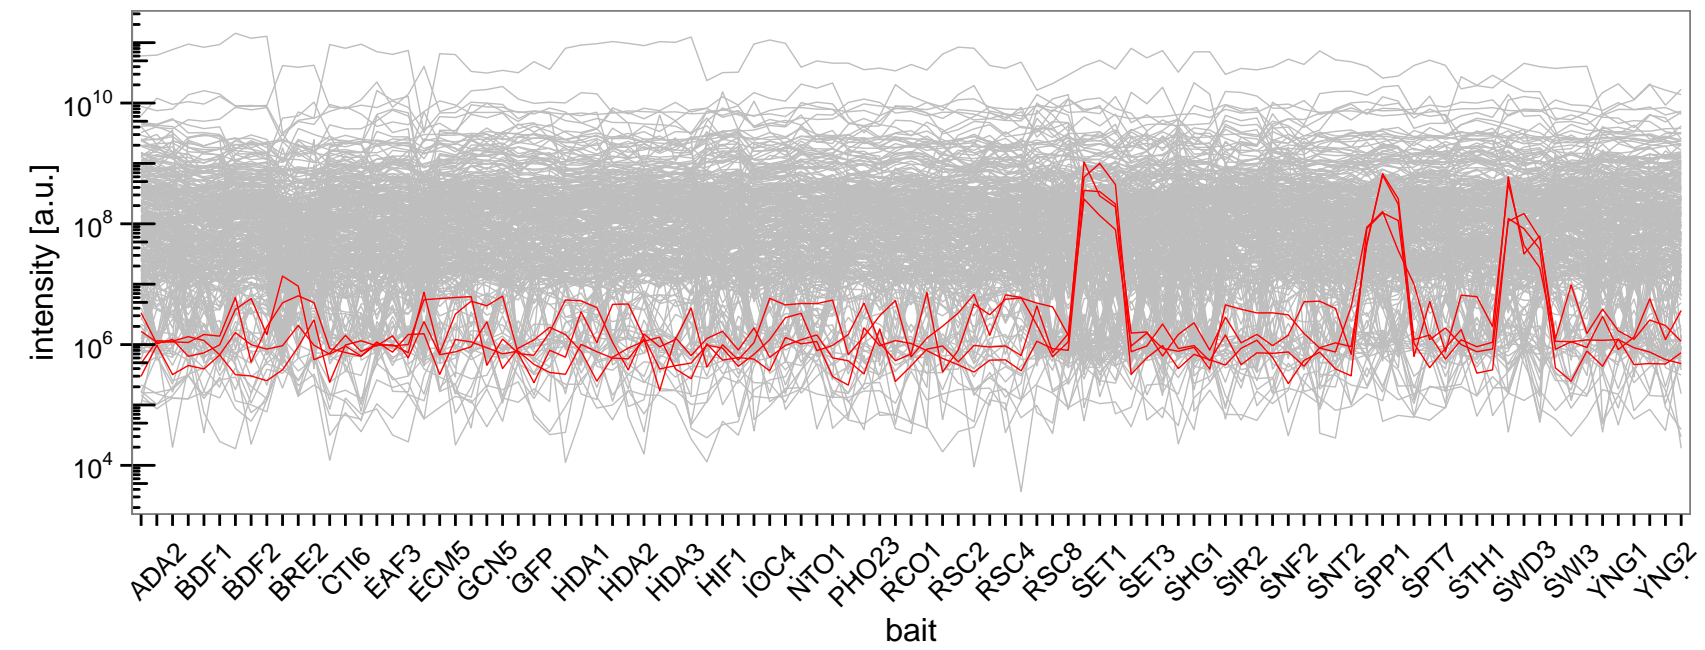

|                   |            |
|-------------------|------------|
| <b>bait</b>       | CTI6       |
| <b>experiment</b> | 27 minutes |

|                    |      |
|--------------------|------|
| <b>interactors</b> | 20   |
| <b>recovery</b>    | 48 % |

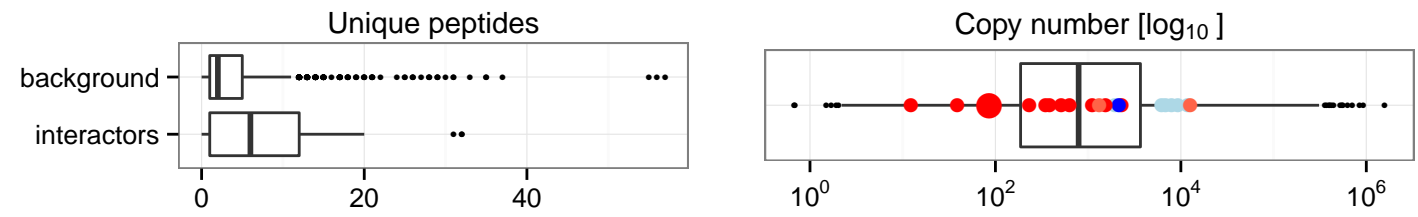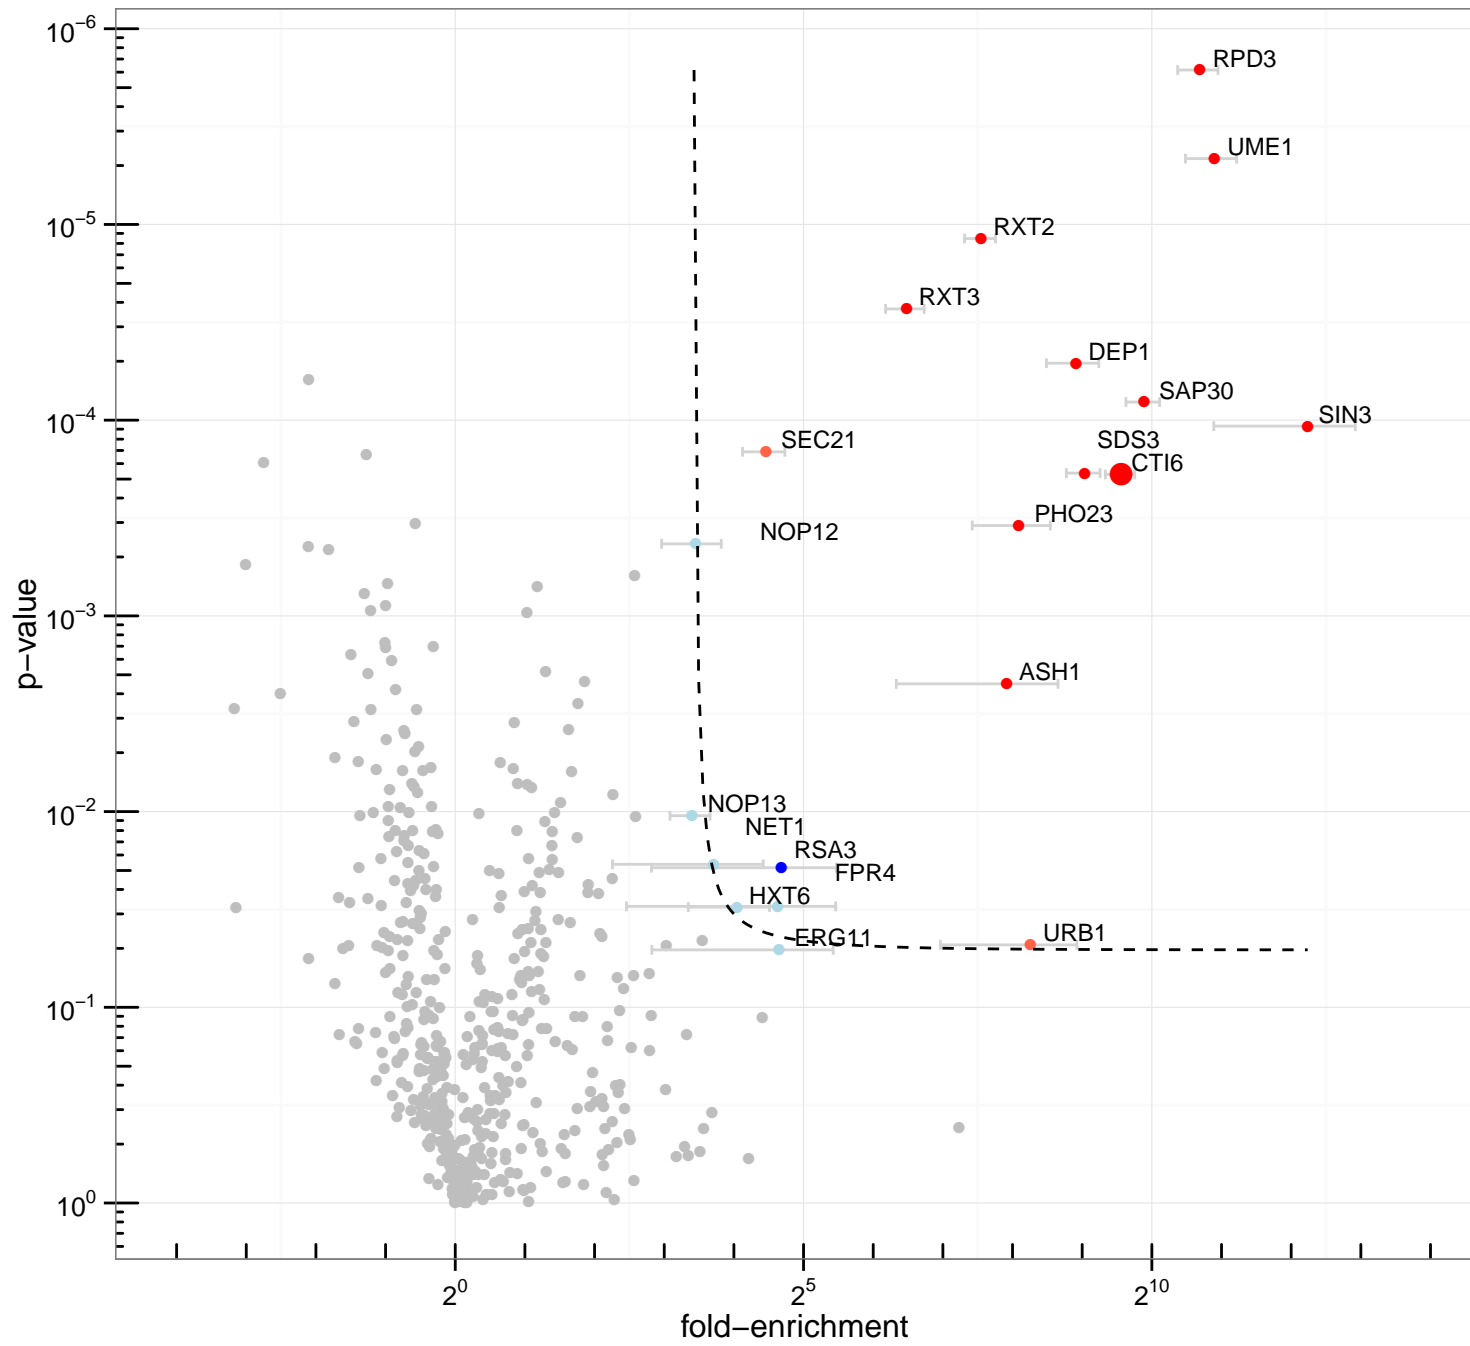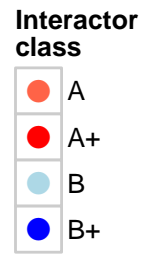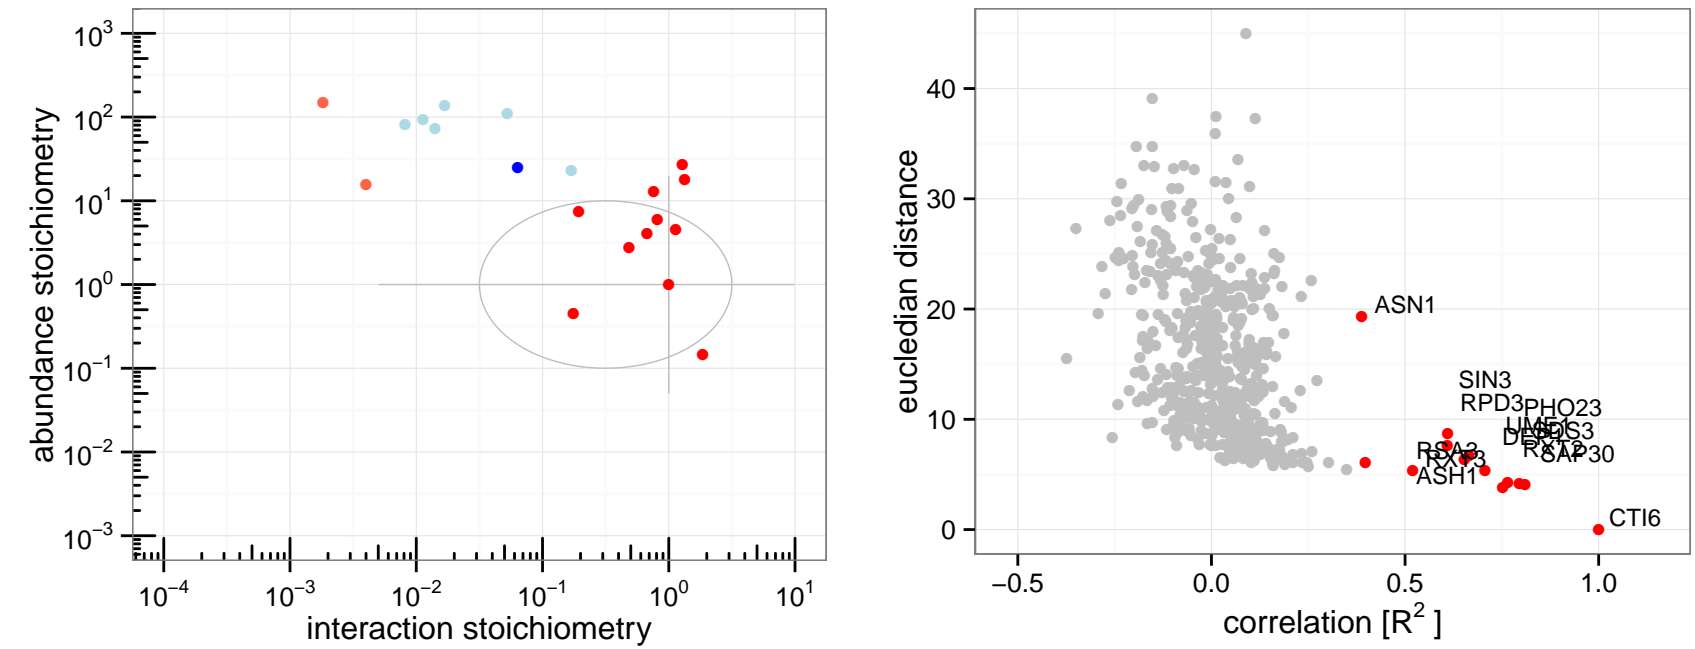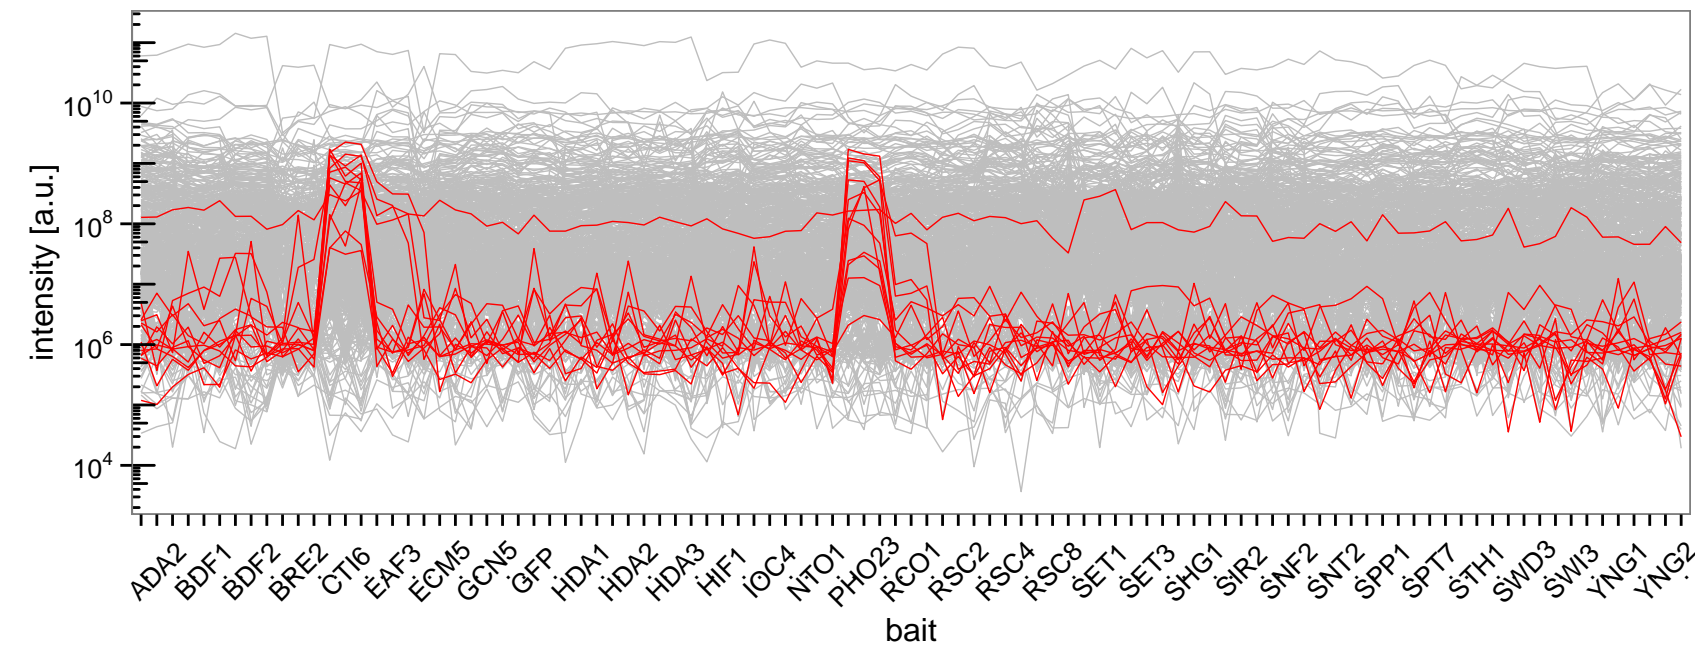

|                         | ASH1 | CTI6 | DEP1 | PHO23 | RPD3 | RSA3 | RXT2 | RXT3 | SAP30 | SDS3 | SEC21 | SIN3 | UME1 | URB1 |
|-------------------------|------|------|------|-------|------|------|------|------|-------|------|-------|------|------|------|
| <i>significance</i>     | 7.4  | 9.3  | 9.0  | 7.9   | 11.0 | 4.1  | 8.2  | 7.1  | 9.8   | 8.9  | 5.2   | 12.0 | 11.0 | 7.4  |
| <i>interactor class</i> | A+   | A+   | A+   | A+    | A+   | B+   | A+   | A+   | A+    | A+   | A     | A+   | A+   | A    |

|                   |            |
|-------------------|------------|
| <b>bait</b>       | EAF3       |
| <b>experiment</b> | 27 minutes |

|                    |      |
|--------------------|------|
| <b>interactors</b> | 5    |
| <b>recovery</b>    | 12 % |

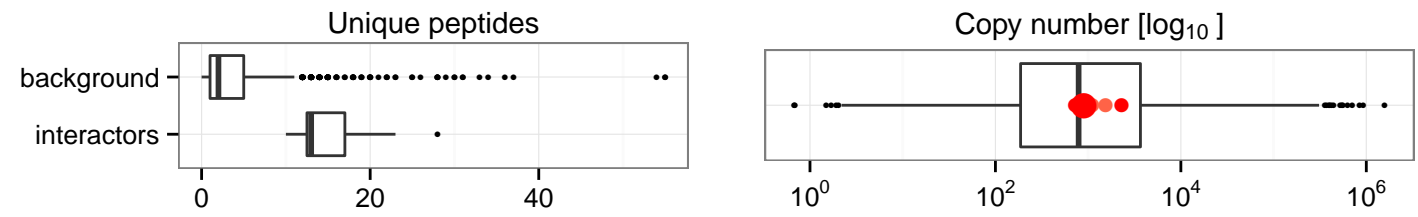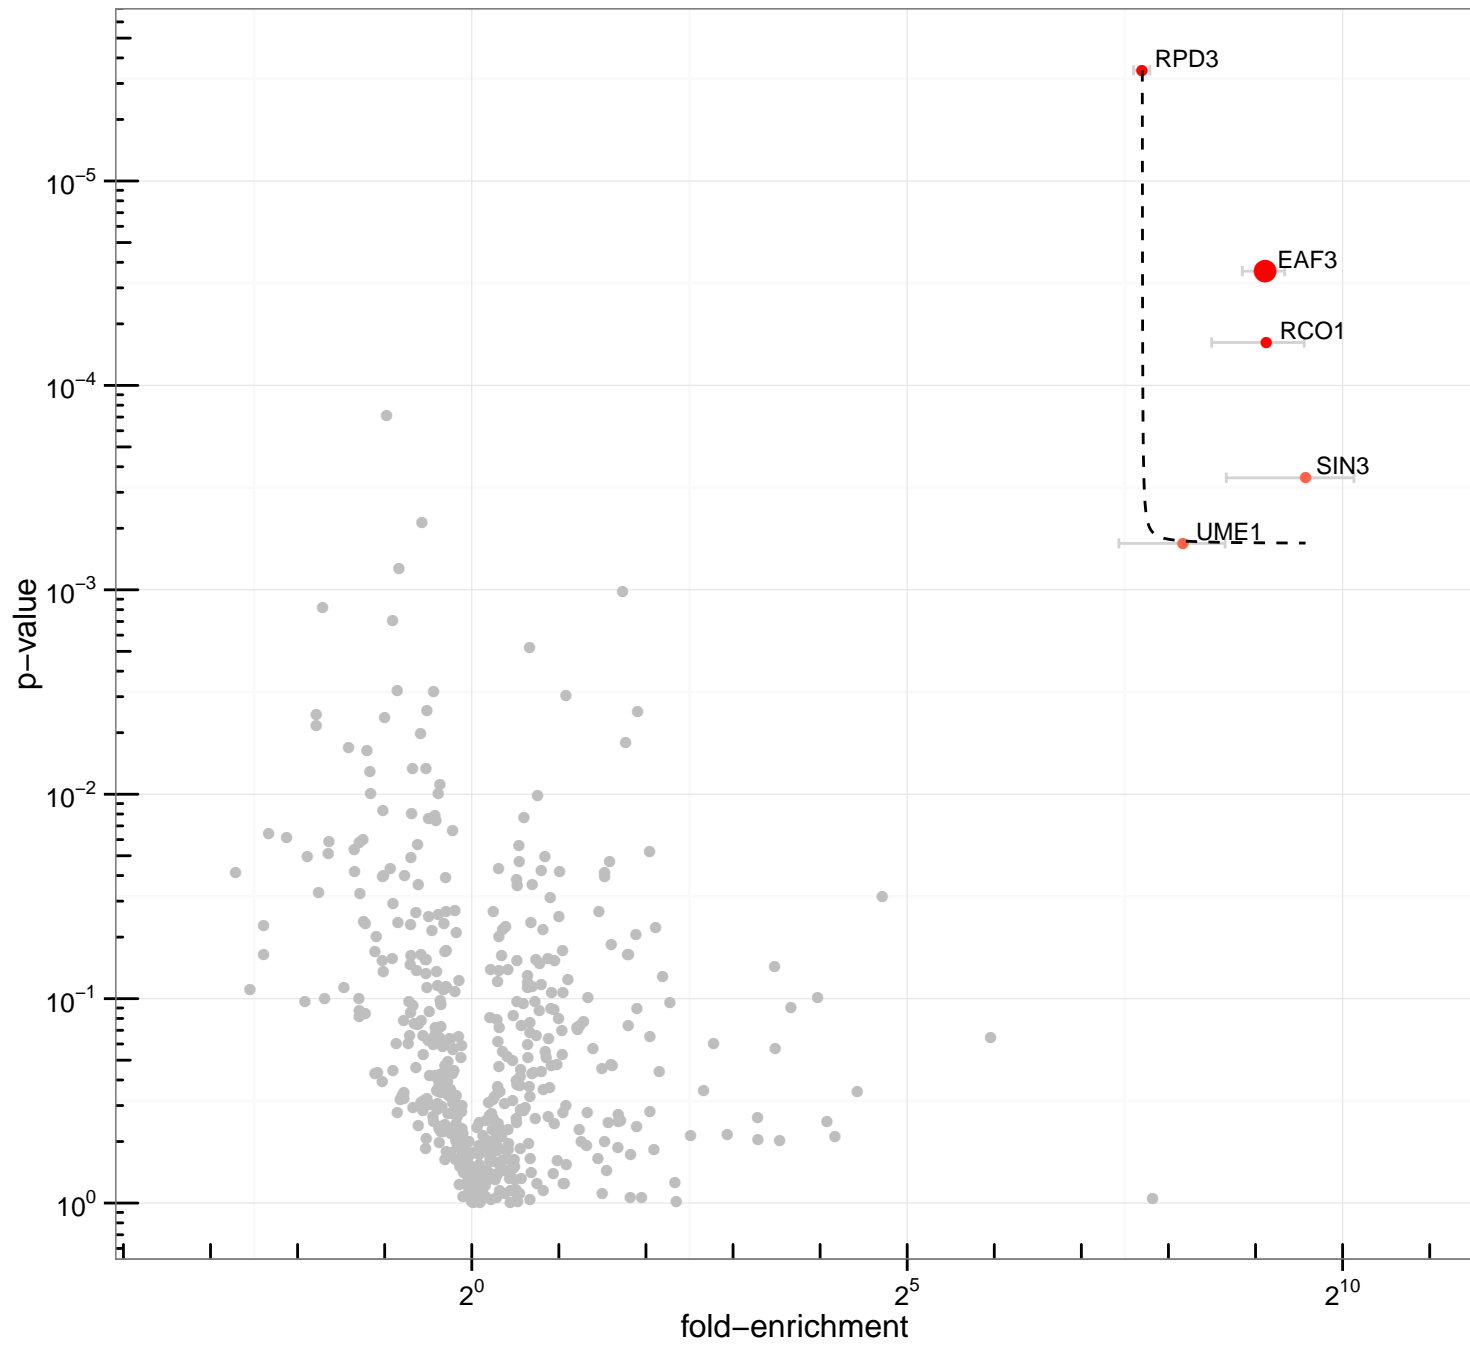

**Interactor class**

- A
- A+

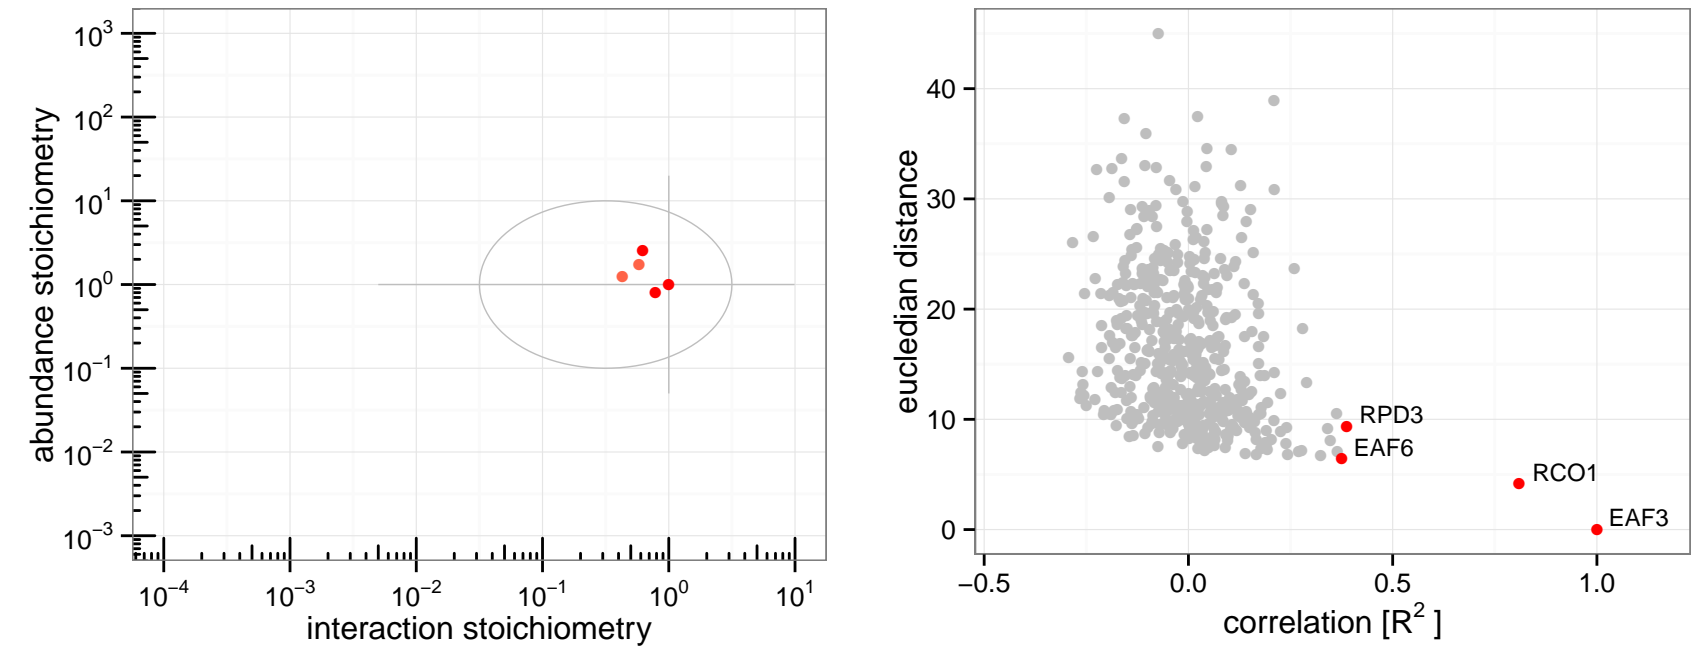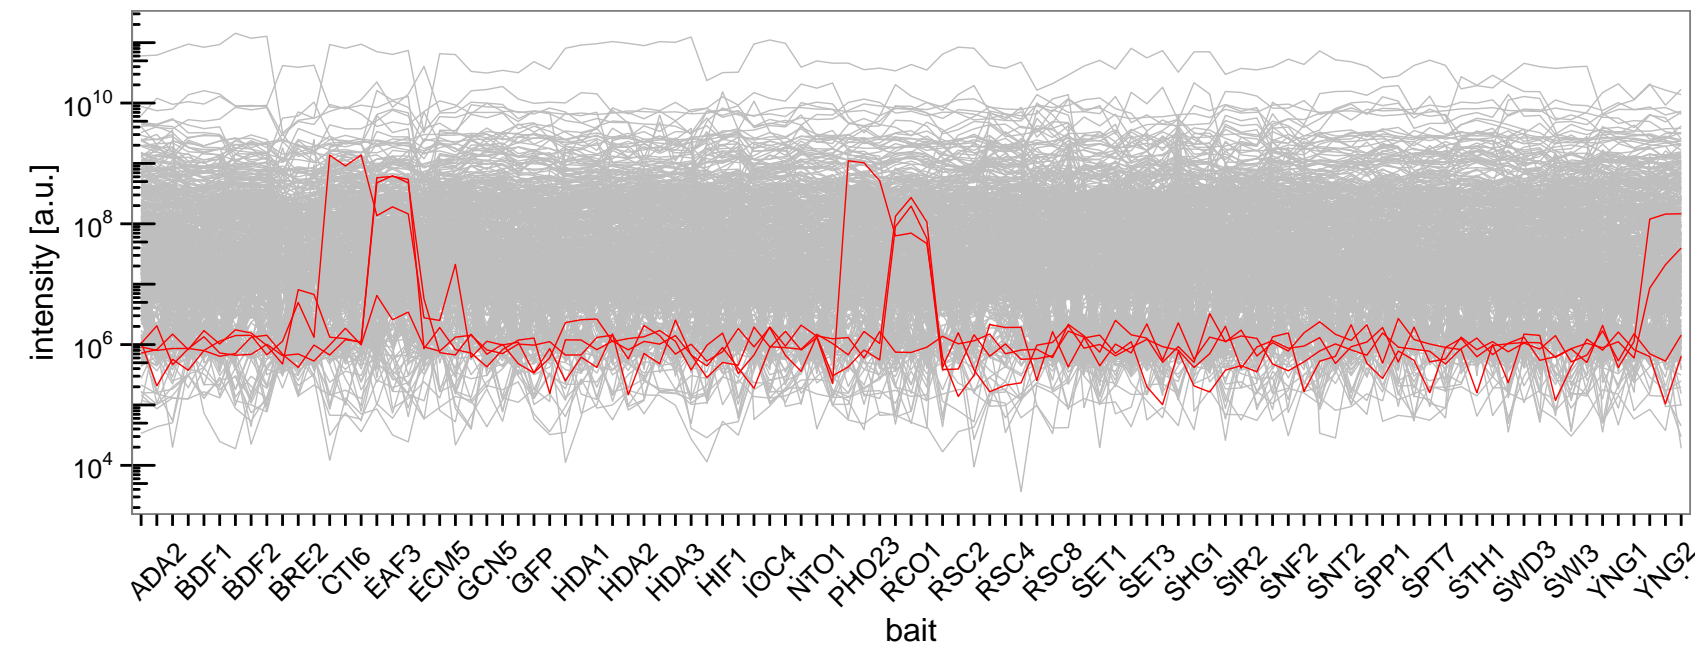

|                         | EAF3 | RCO1 | RPD3 | SIN3 | UME1 |
|-------------------------|------|------|------|------|------|
| <i>significance</i>     | 9.3  | 9.2  | 8.7  | 9.3  | 7.9  |
| <i>interactor class</i> | A+   | A+   | A+   | A    | A    |



|                   |            |
|-------------------|------------|
| <b>bait</b>       | ECM5       |
| <b>experiment</b> | 27 minutes |

|                    |     |
|--------------------|-----|
| <b>interactors</b> | 0   |
| <b>recovery</b>    | 0 % |

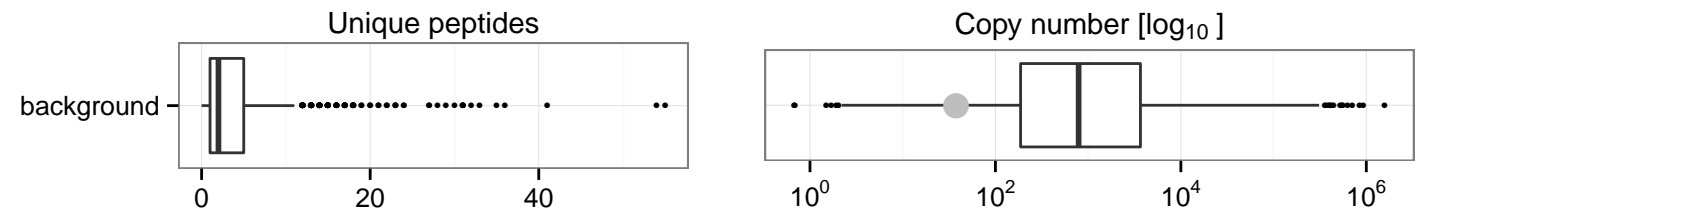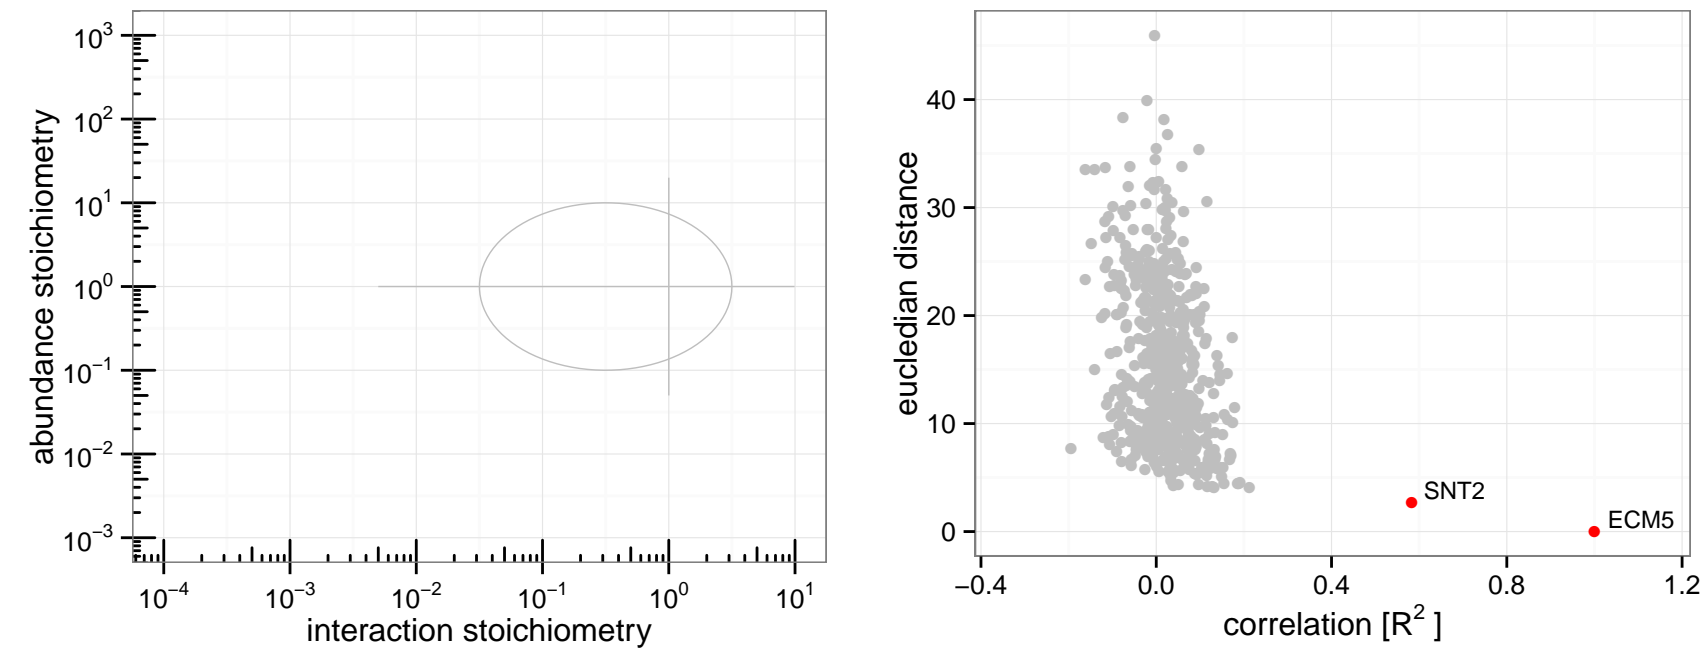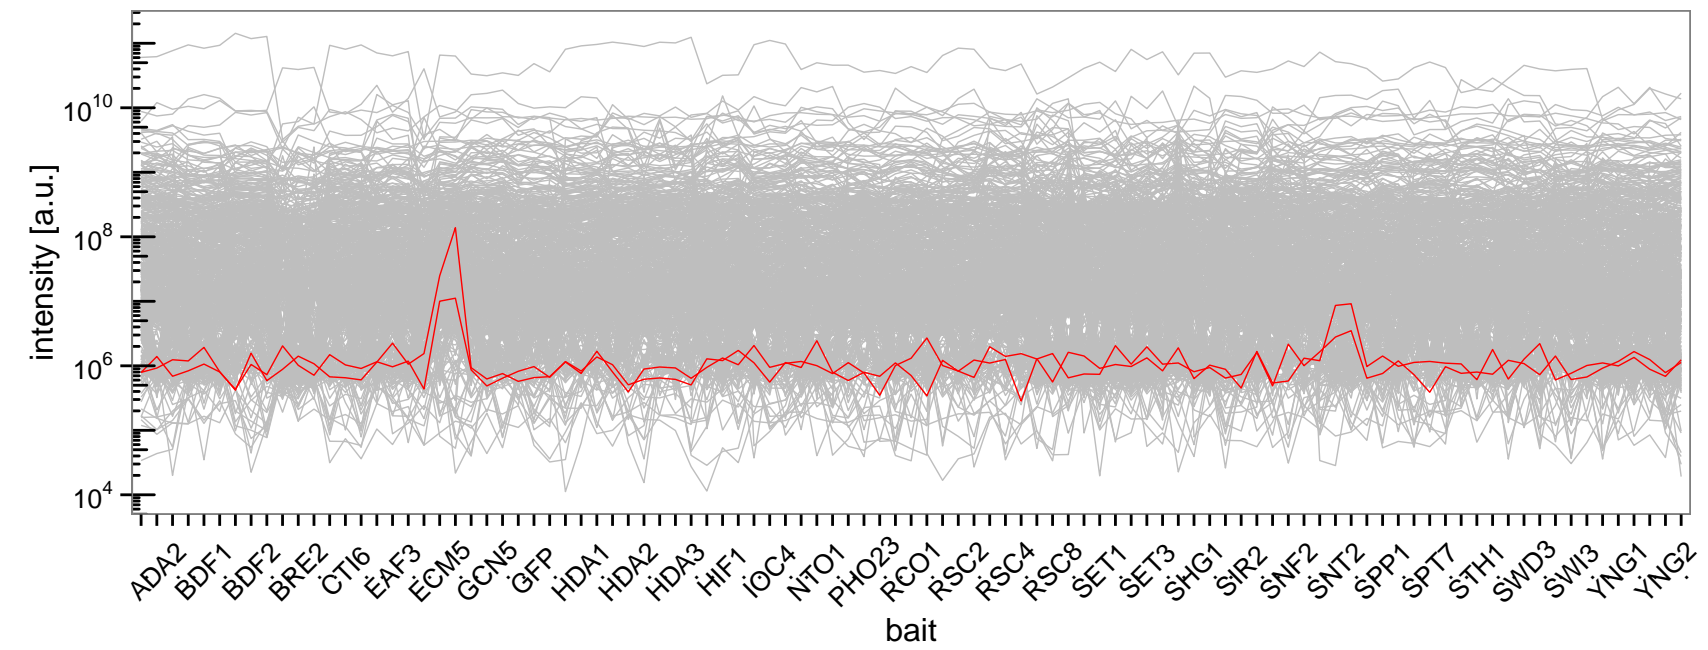

**Interactor class**  
 -

*significance*  
*interactor class*

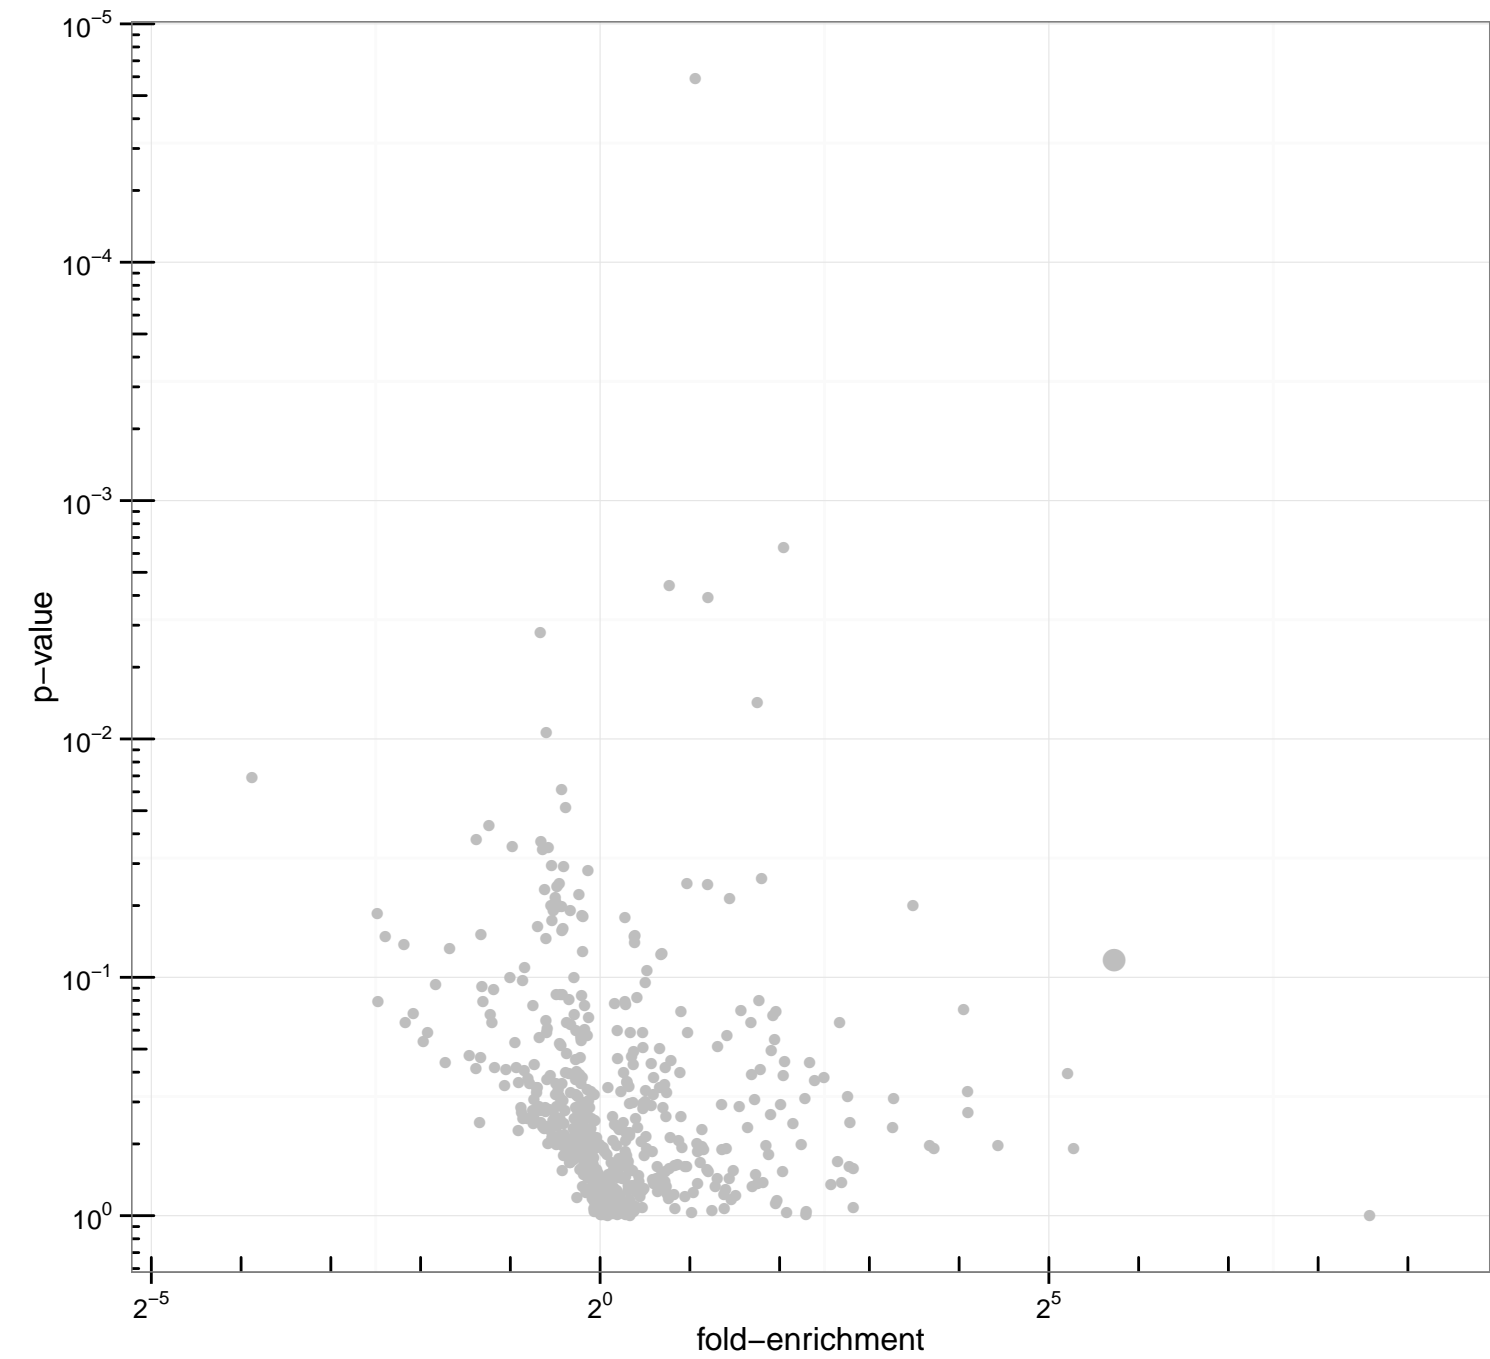

|                   |            |
|-------------------|------------|
| <b>bait</b>       | GCN5       |
| <b>experiment</b> | 27 minutes |

|                    |      |
|--------------------|------|
| <b>interactors</b> | 17   |
| <b>recovery</b>    | 71 % |

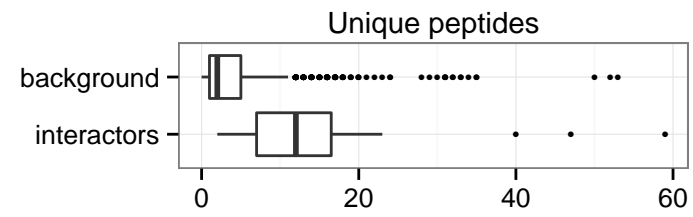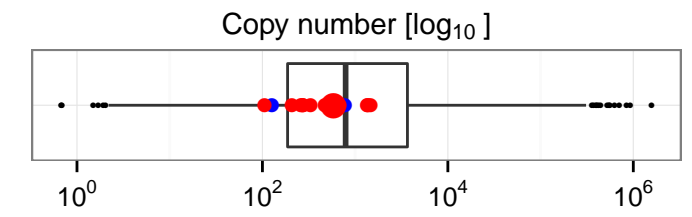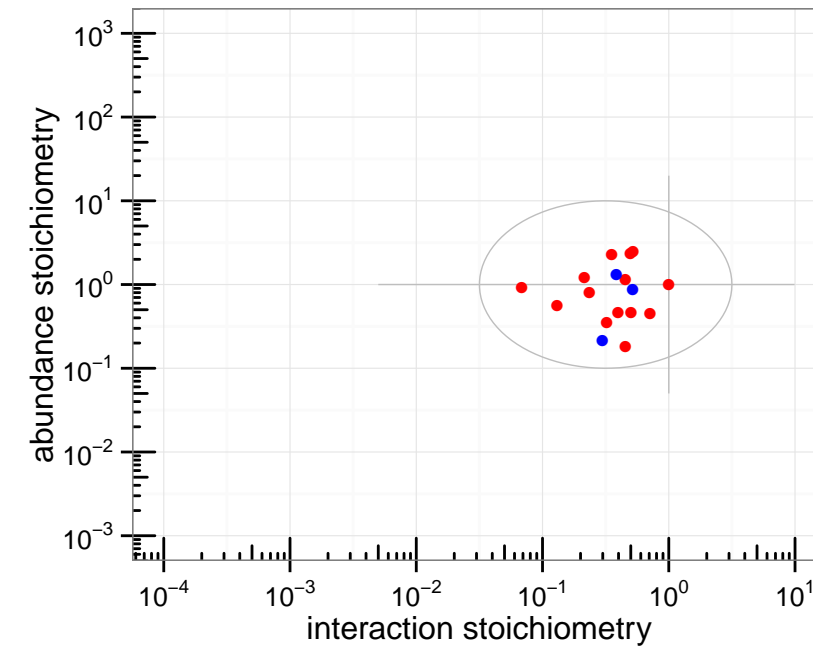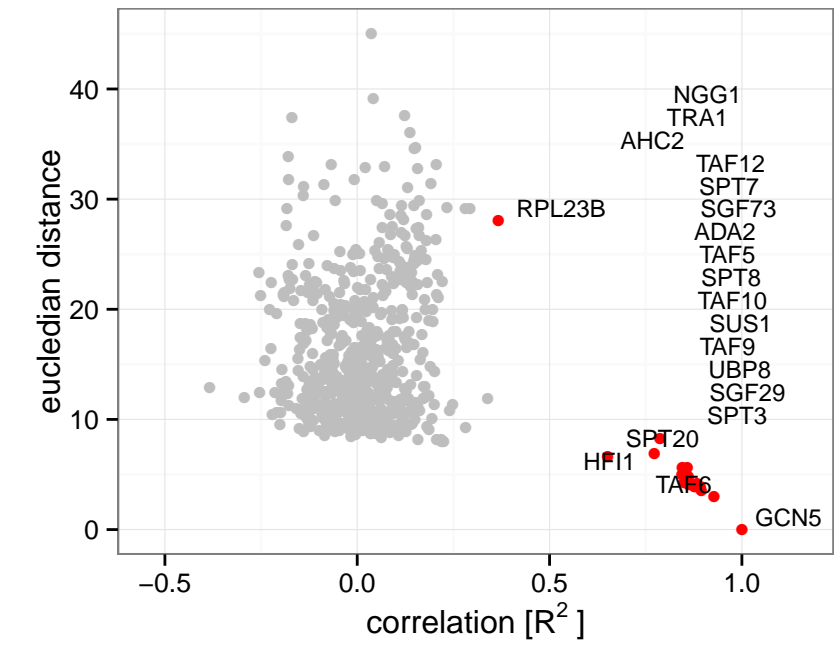

**Interactor class**

● A+

● B+

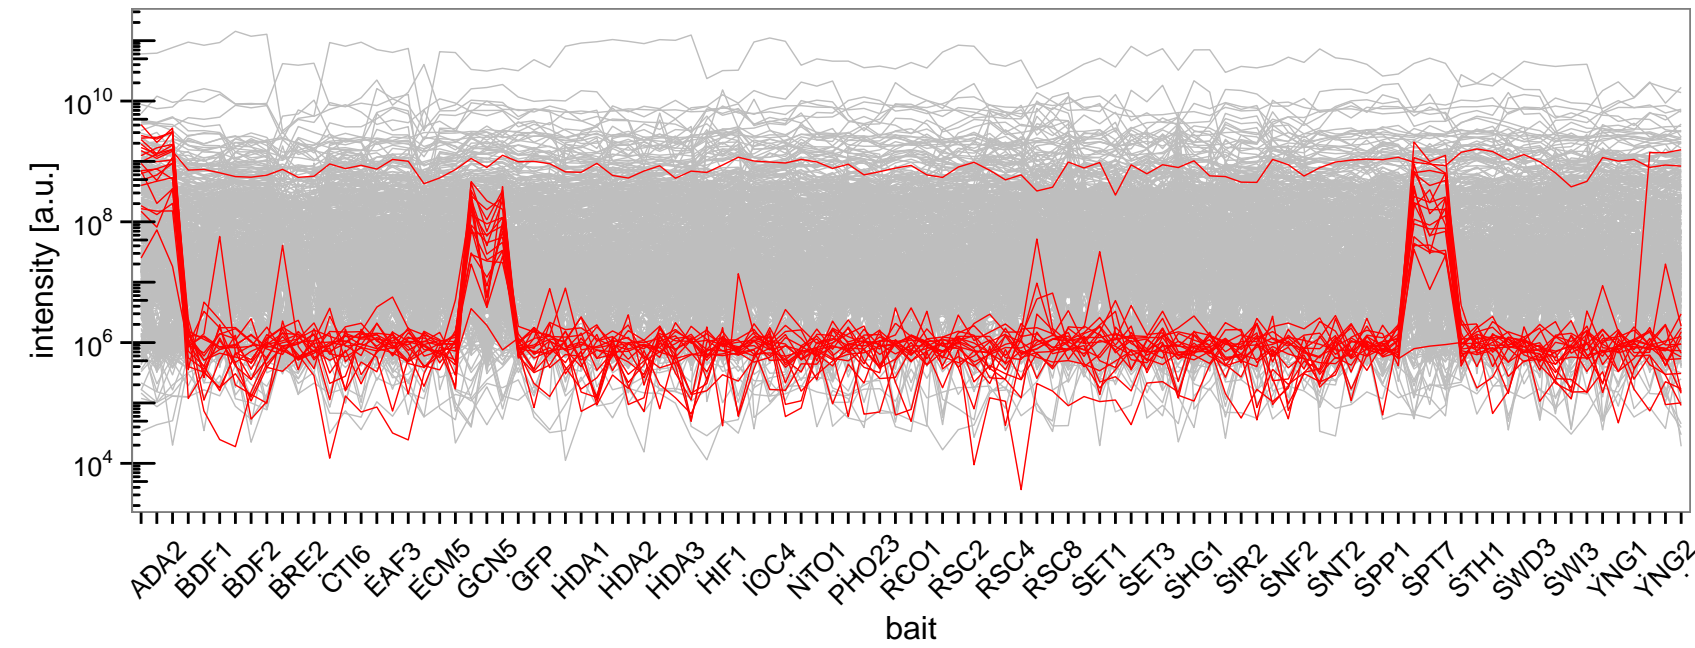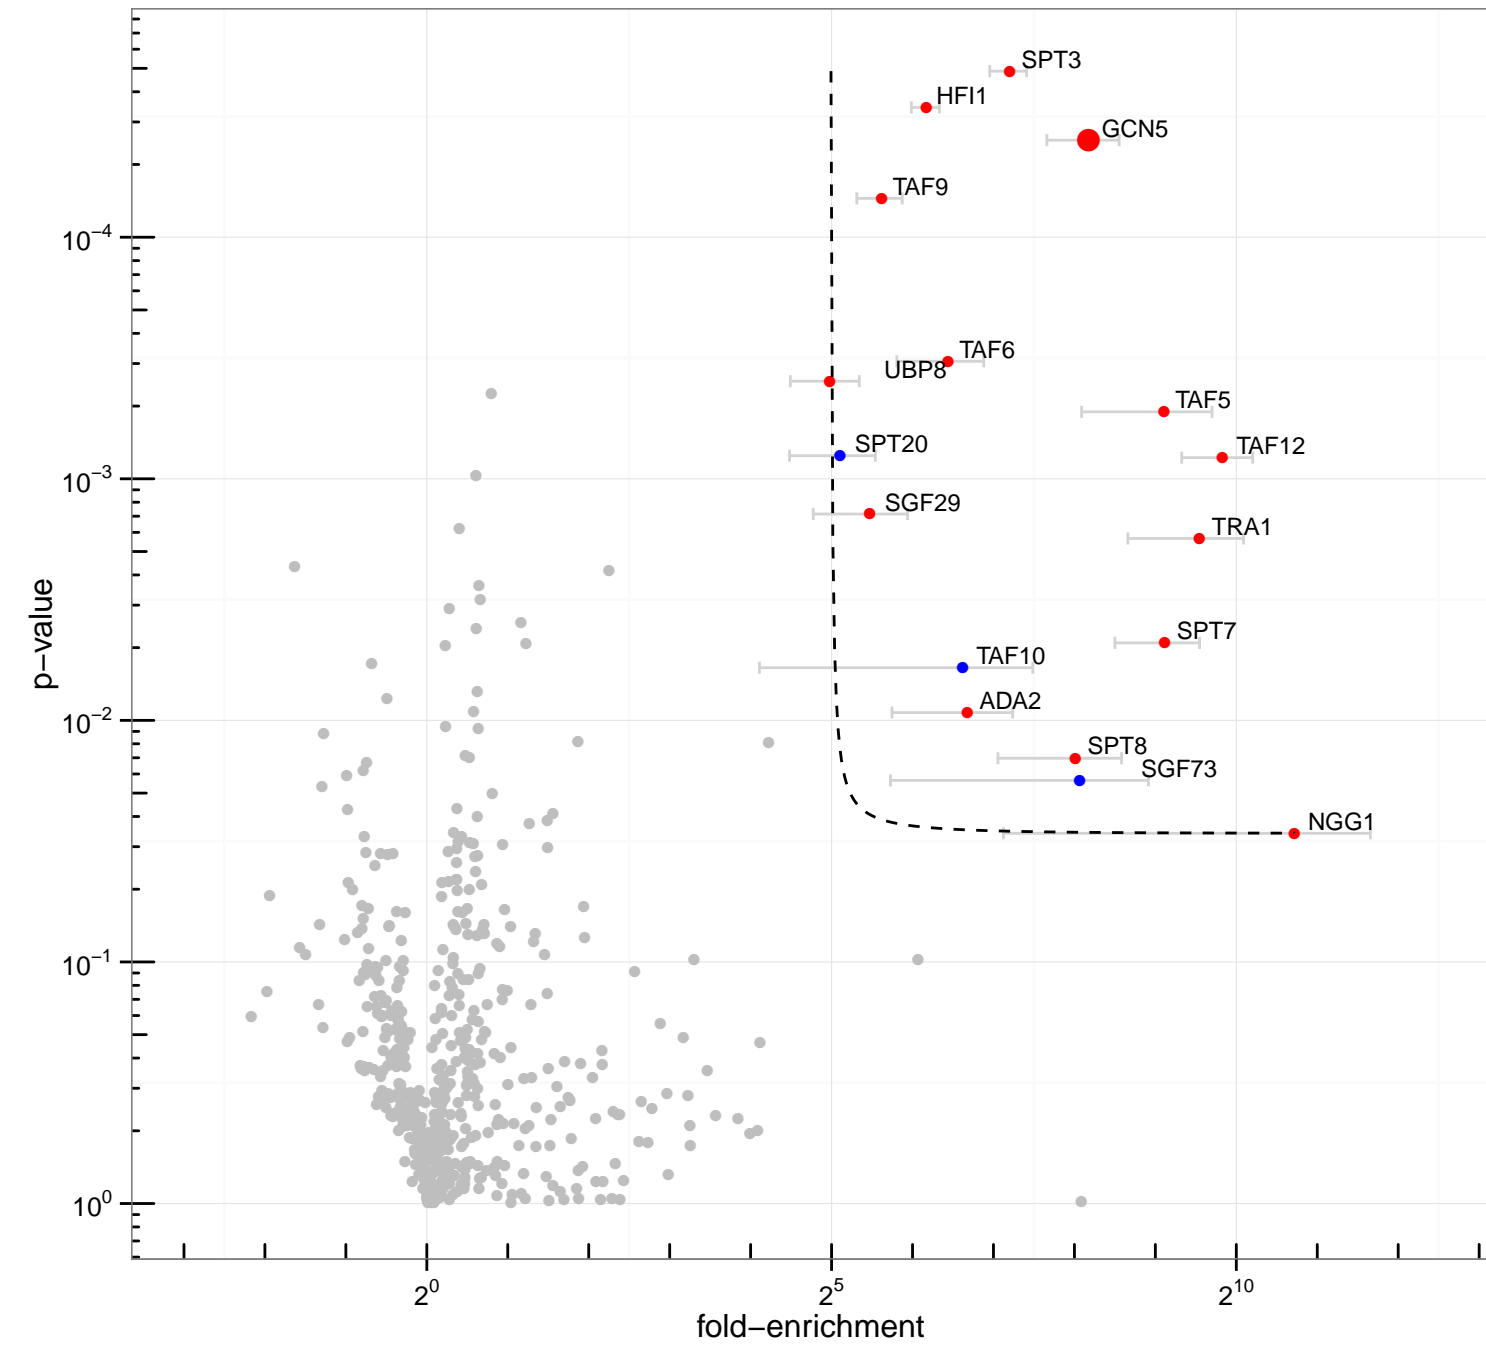

|                         | ADA2 | GCN5 | HF11 | NGG1 | SGF29 | SGF73 | SPT20 | SPT3 | SPT7 | SPT8 | TAF10 | TAF12 | TAF5 | TAF6 | TAF9 | TRA1 | UBP8 |
|-------------------------|------|------|------|------|-------|-------|-------|------|------|------|-------|-------|------|------|------|------|------|
| <i>significance</i>     | 6.0  | 8.4  | 6.9  | 9.8  | 5.3   | 7.3   | 5.1   | 7.8  | 8.4  | 7.3  | 6.0   | 9.4   | 8.7  | 6.5  | 6.2  | 9.0  | 5.2  |
| <i>interactor class</i> | A+   | A+   | A+   | A+   | A+    | B+    | B+    | A+   | A+   | A+   | B+    | A+    | A+   | A+   | A+   | A+   | A+   |

|                   |            |
|-------------------|------------|
| <b>bait</b>       | GFP        |
| <b>experiment</b> | 27 minutes |

|                    |       |
|--------------------|-------|
| <b>interactors</b> | 0     |
| <b>recovery</b>    | NaN % |

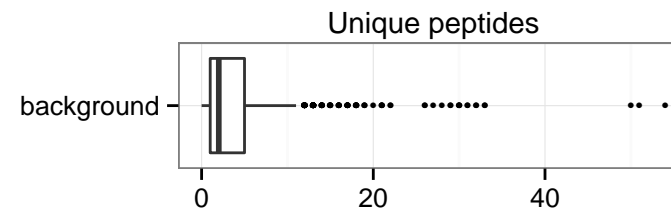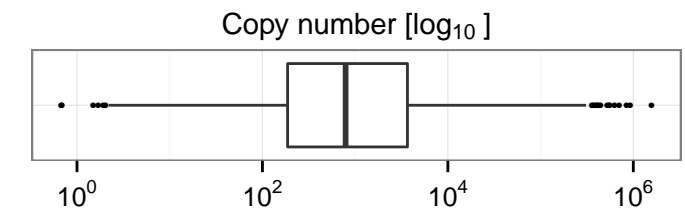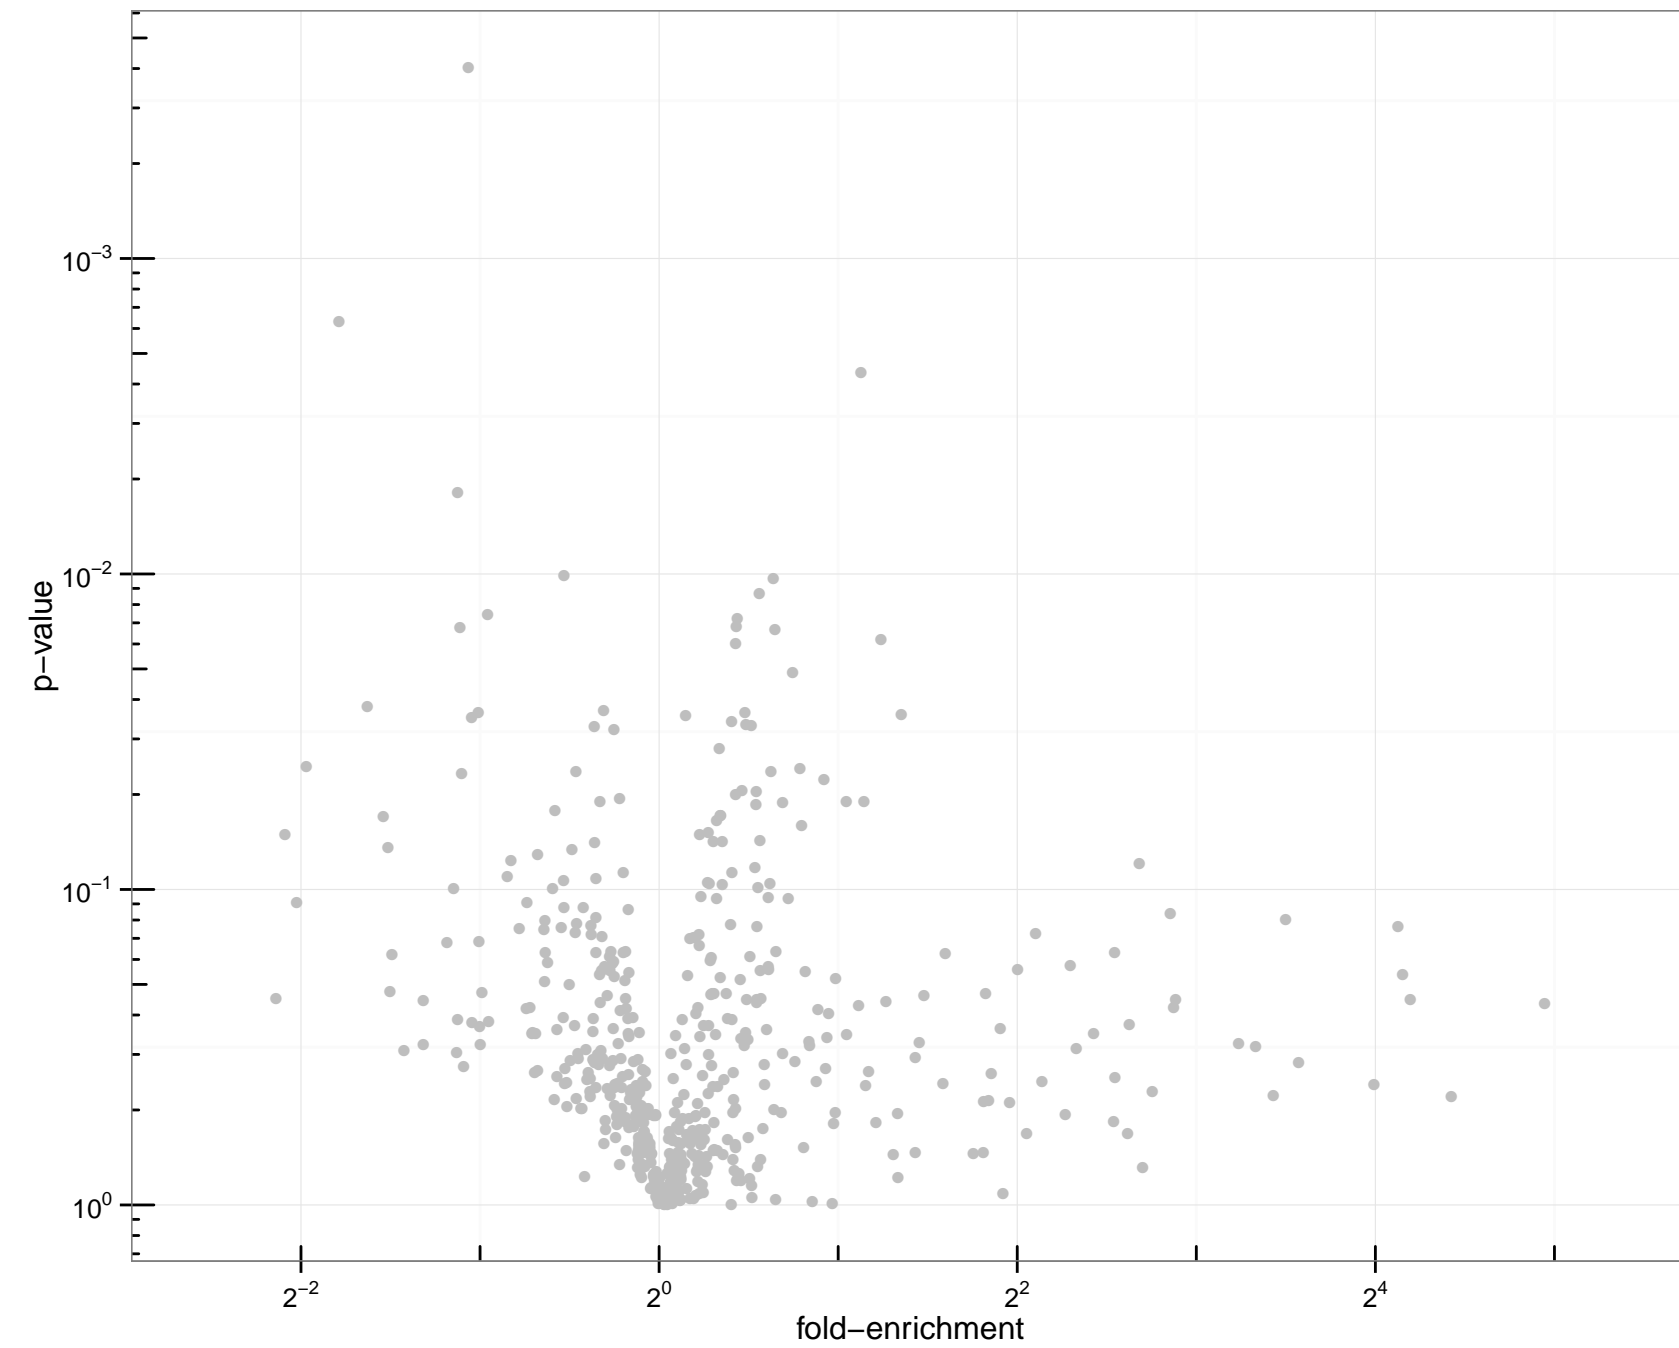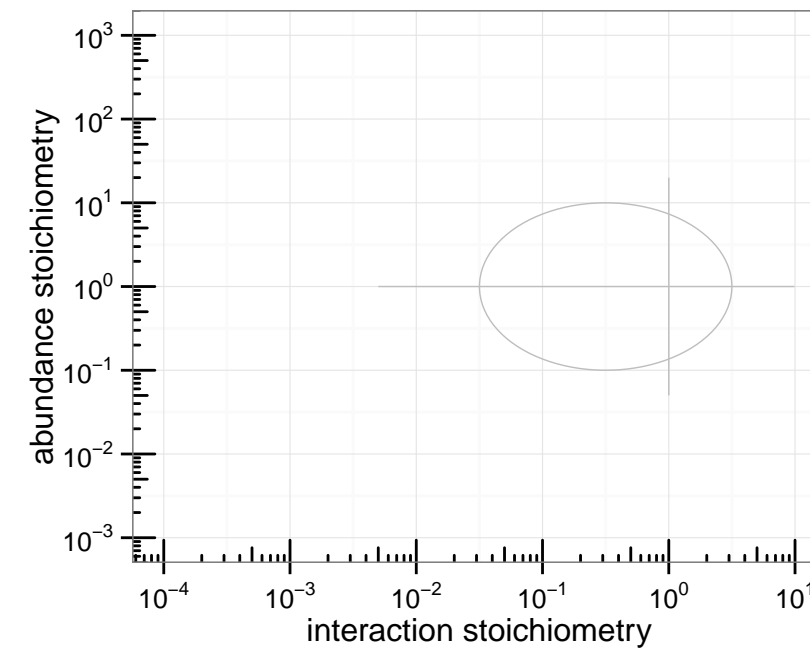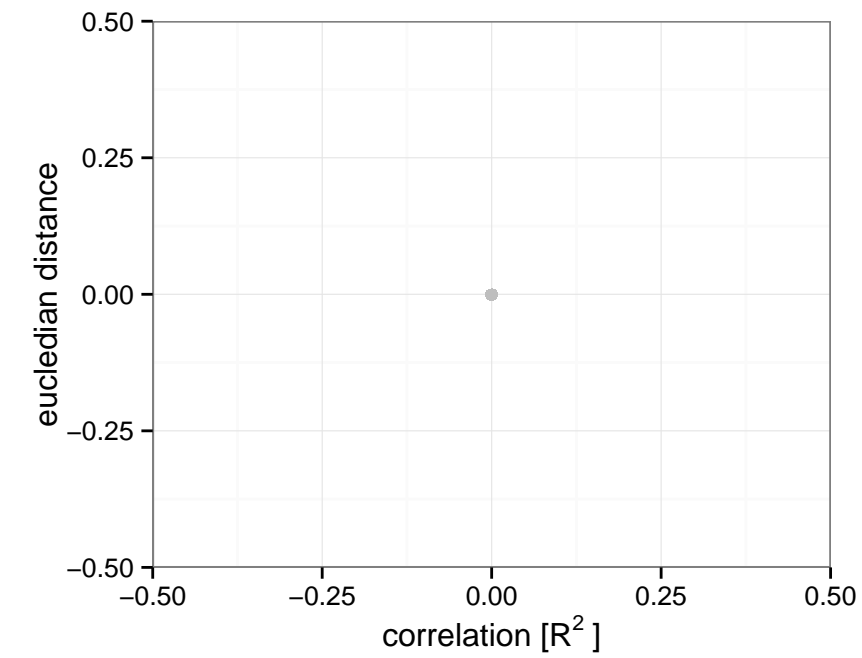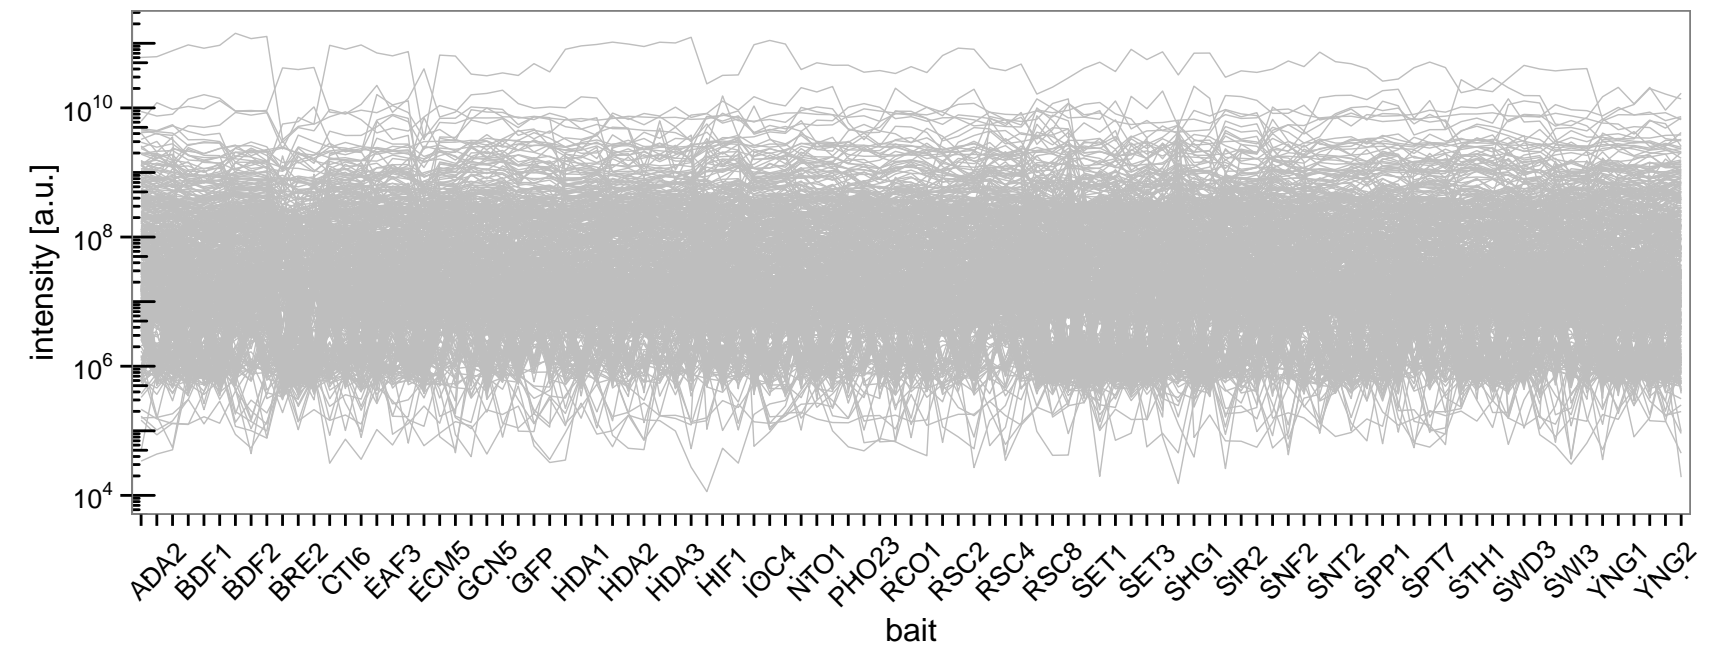

significance  
interactor class



|                   |            |
|-------------------|------------|
| <b>bait</b>       | HDA1       |
| <b>experiment</b> | 27 minutes |

|                    |       |
|--------------------|-------|
| <b>interactors</b> | 3     |
| <b>recovery</b>    | 100 % |

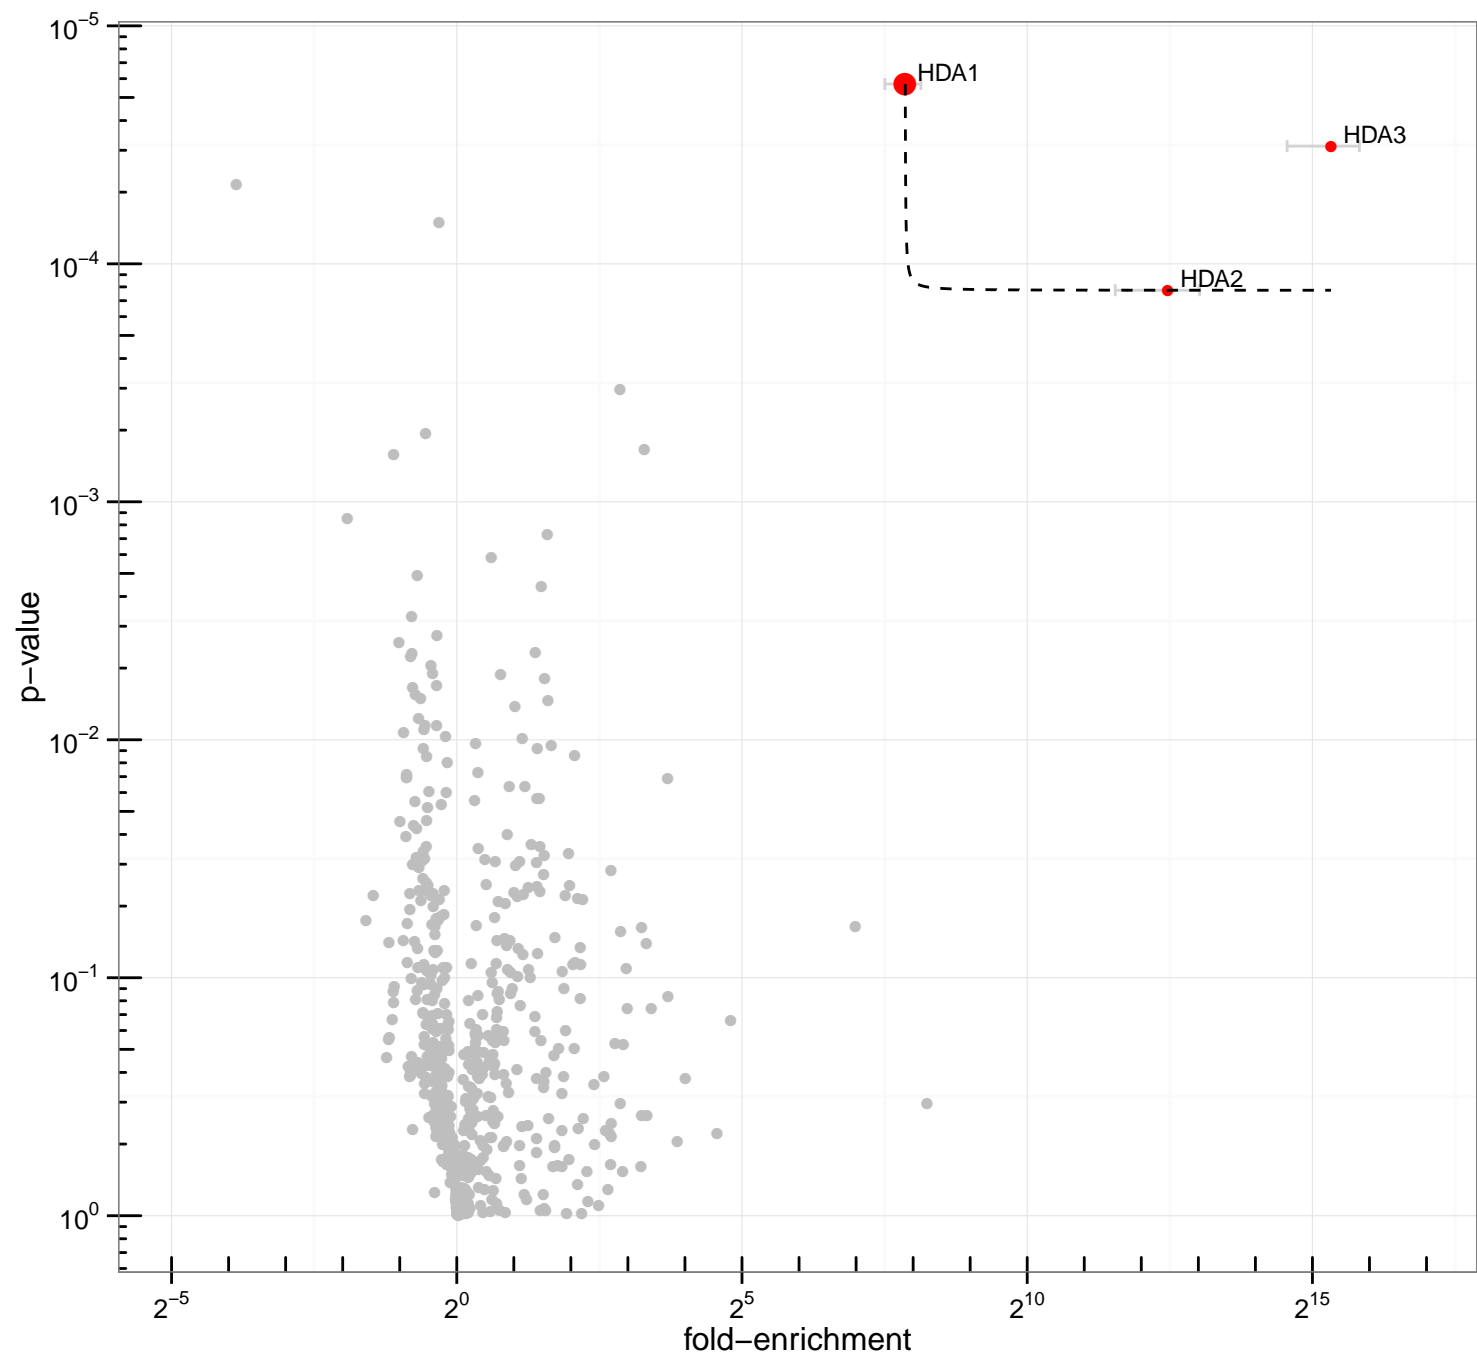

**Interactor class**  
● A+

|                         | HDA1 | HDA2 | HDA3 |
|-------------------------|------|------|------|
| <i>significance</i>     | 8.3  | 12.0 | 15.0 |
| <i>interactor class</i> | A+   | A+   | A+   |

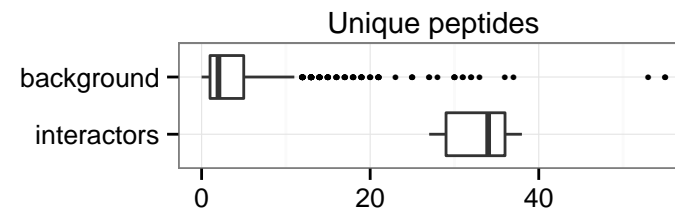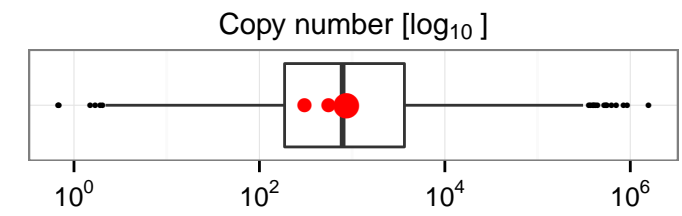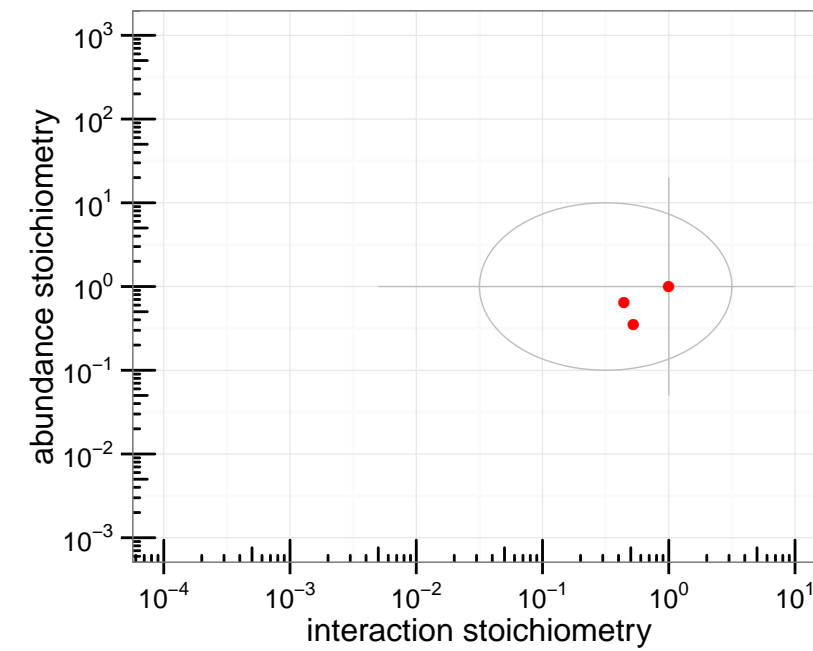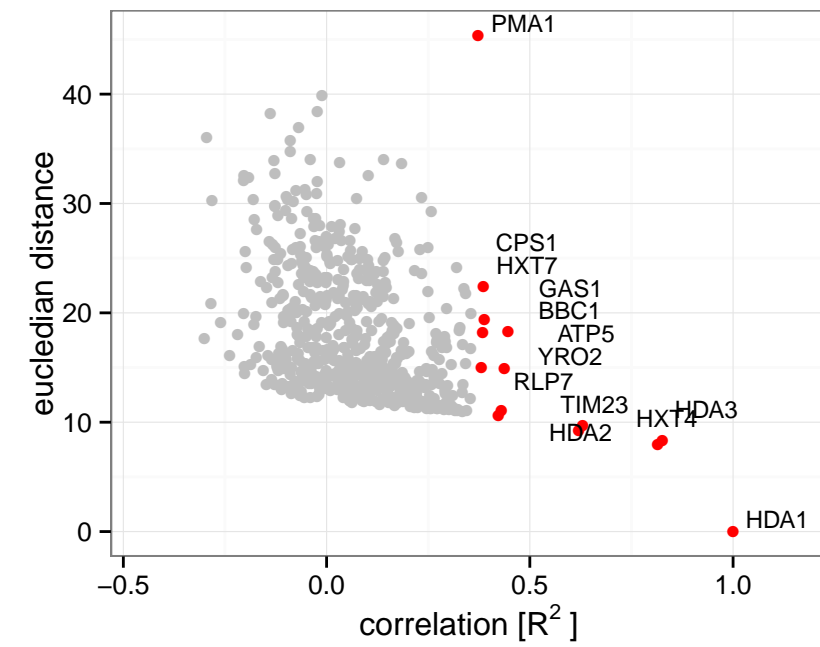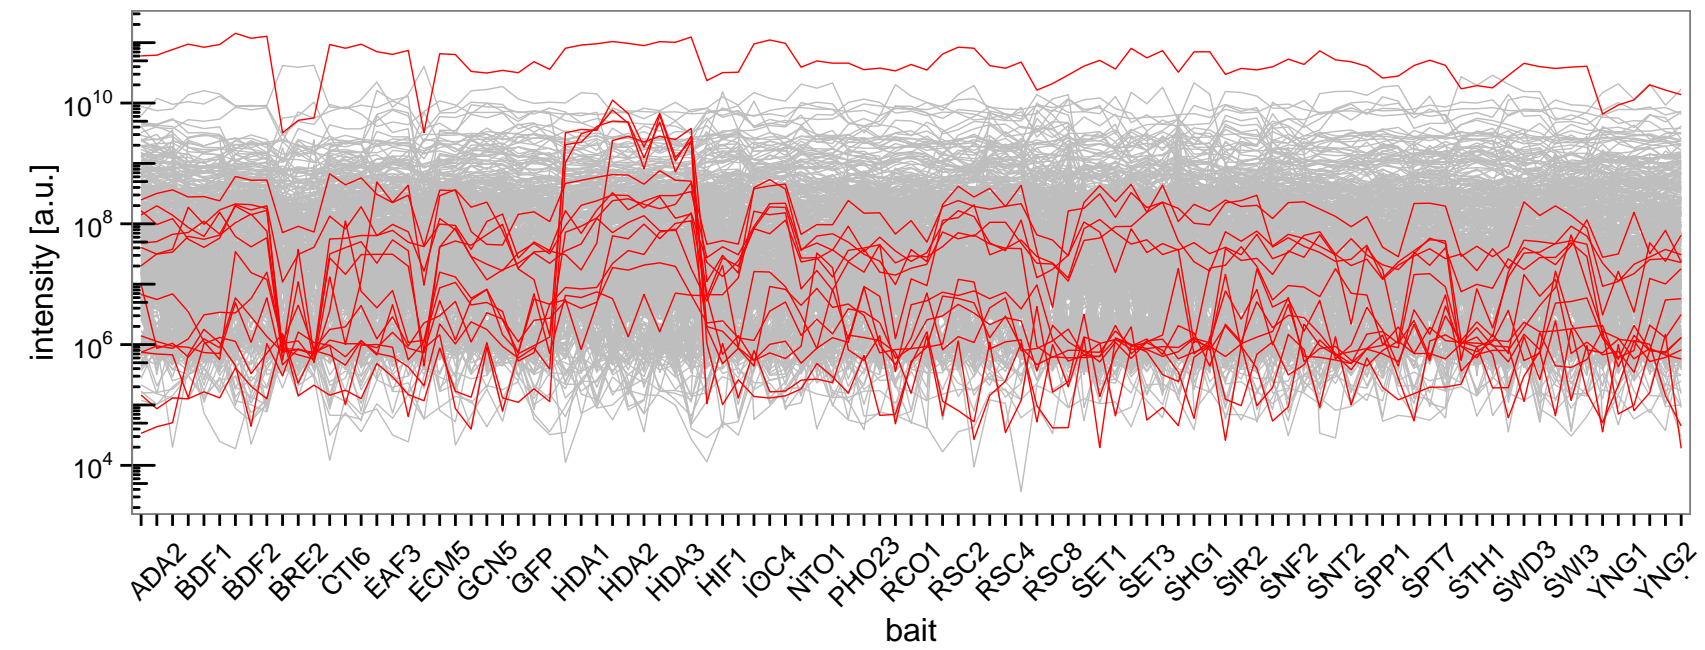

|                   |            |
|-------------------|------------|
| <b>bait</b>       | HDA2       |
| <b>experiment</b> | 27 minutes |

|                    |       |
|--------------------|-------|
| <b>interactors</b> | 6     |
| <b>recovery</b>    | 100 % |

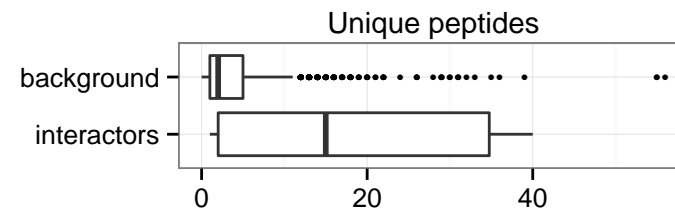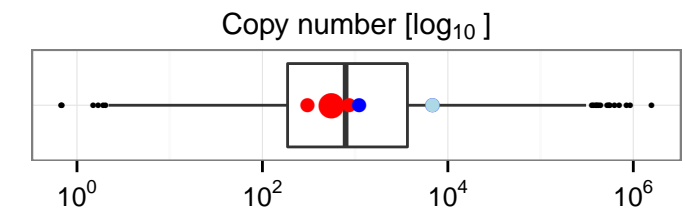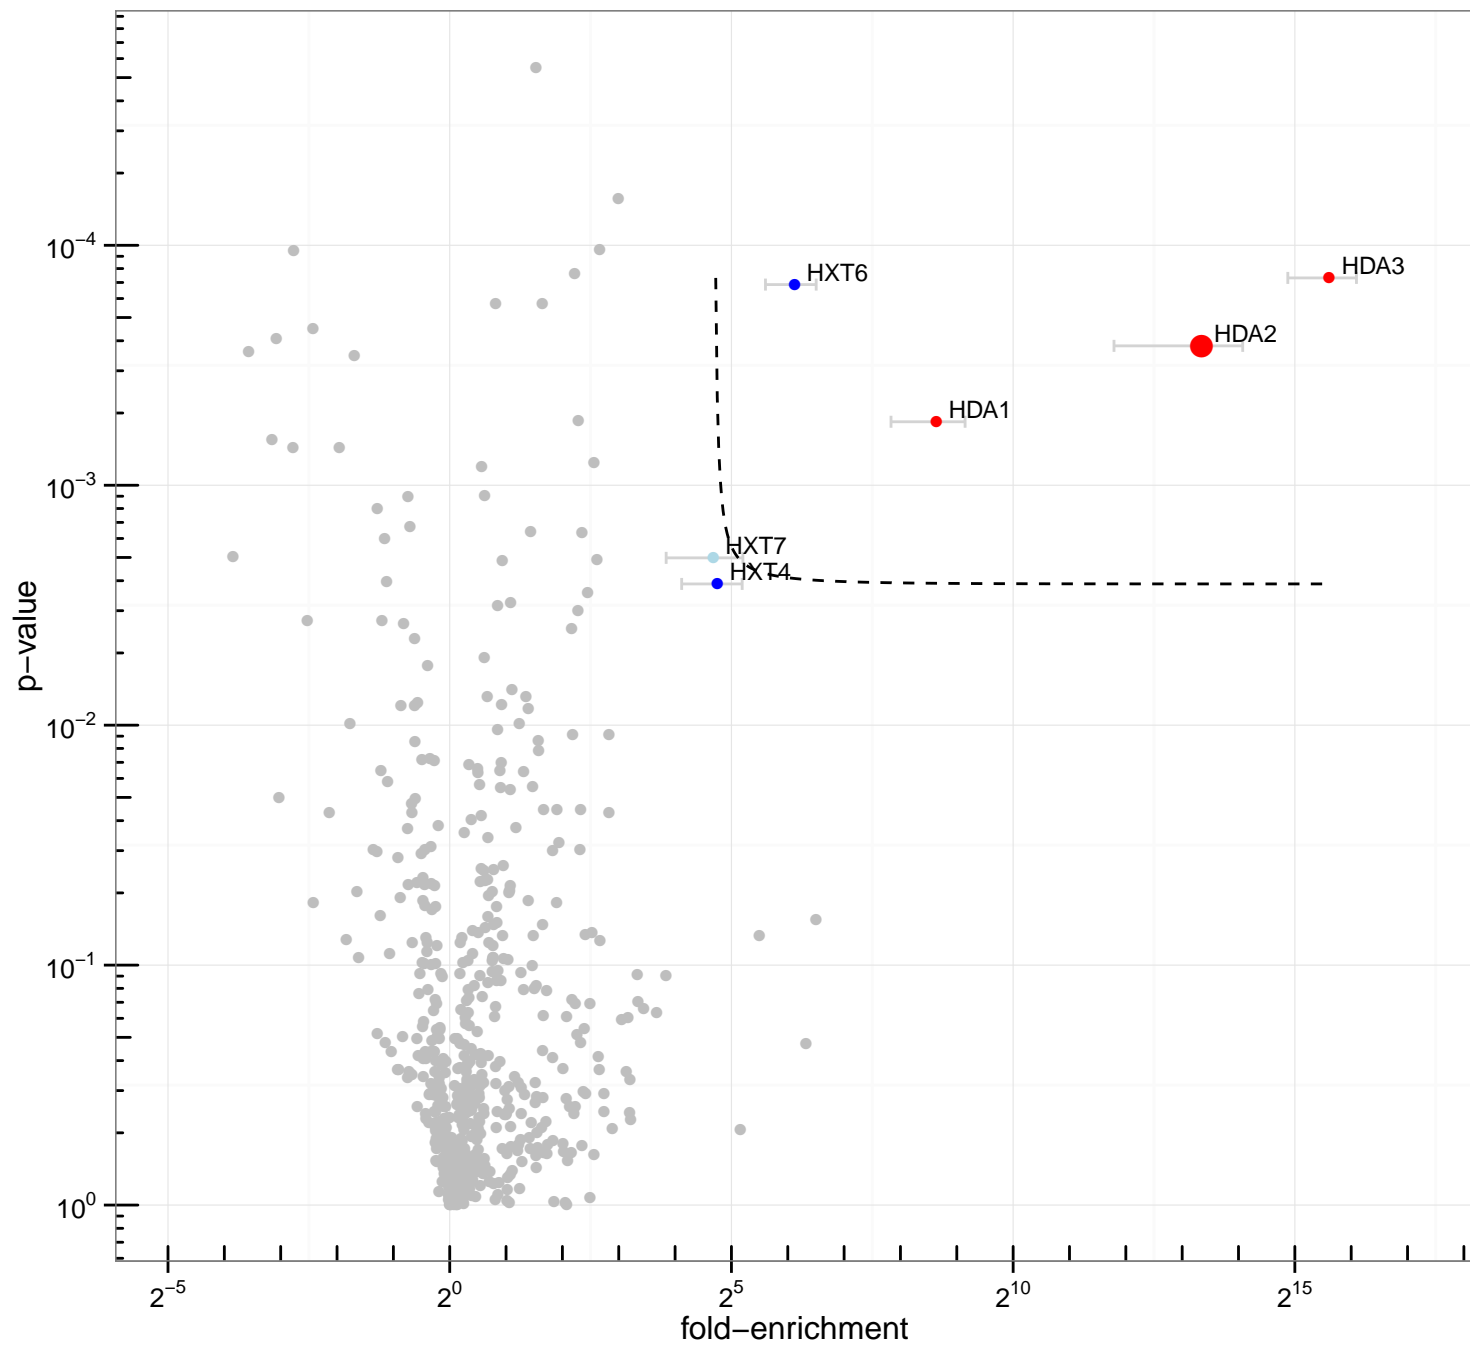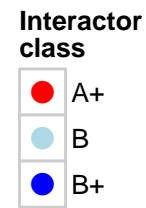

|                         | HDA1 | HDA2 | HDA3 | HXT4 | HXT6 |
|-------------------------|------|------|------|------|------|
| <i>significance</i>     | 8.3  | 13.0 | 15.0 | 4.6  | 6.4  |
| <i>interactor class</i> | A+   | A+   | A+   | B+   | B+   |

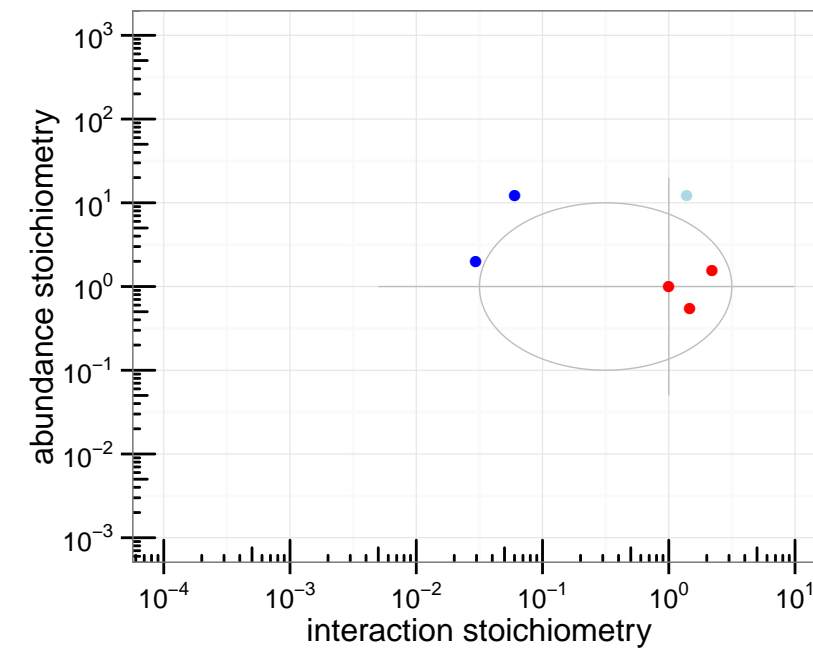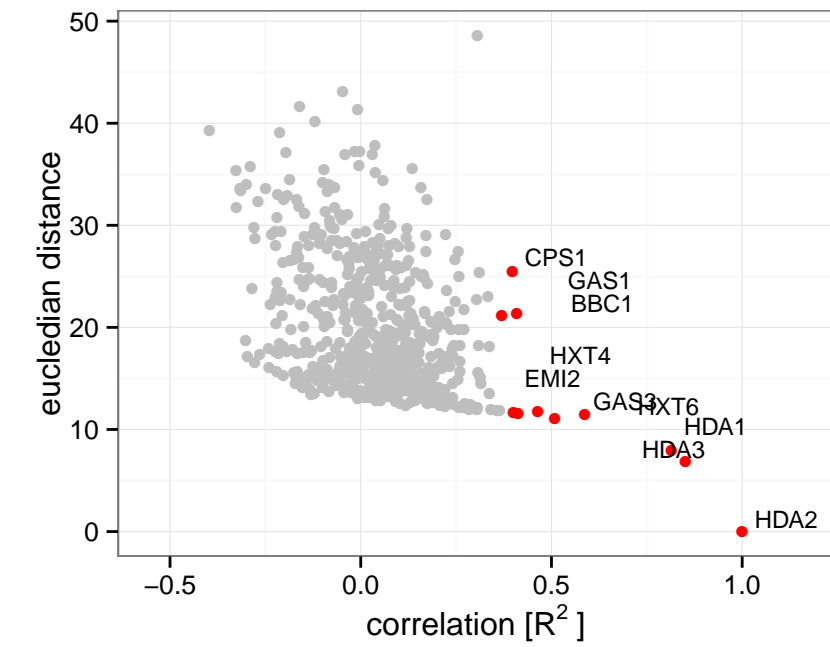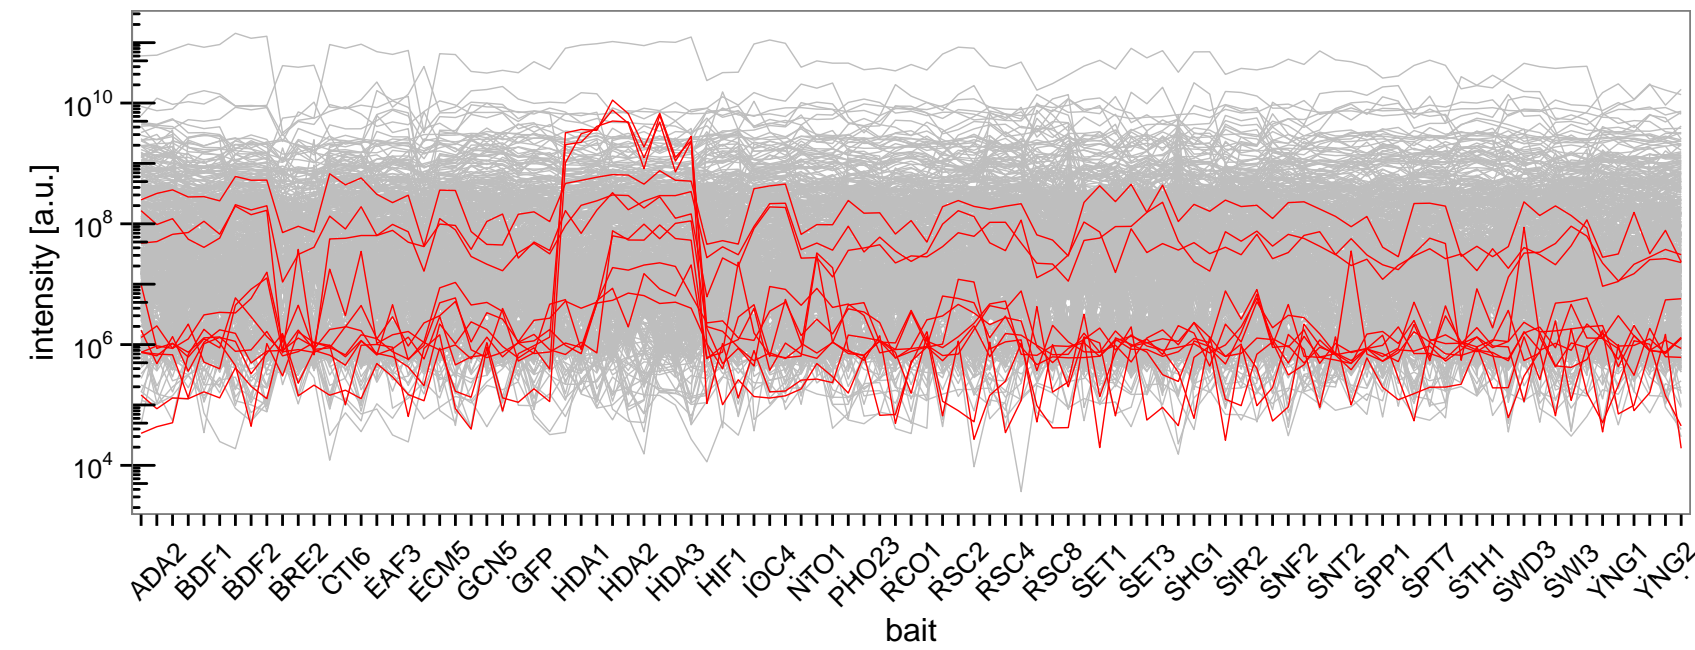

|                   |            |
|-------------------|------------|
| <b>bait</b>       | HDA3       |
| <b>experiment</b> | 27 minutes |

|                    |       |
|--------------------|-------|
| <b>interactors</b> | 6     |
| <b>recovery</b>    | 100 % |

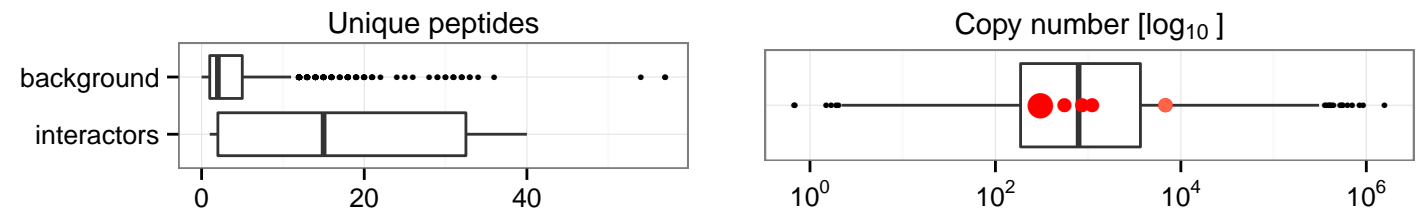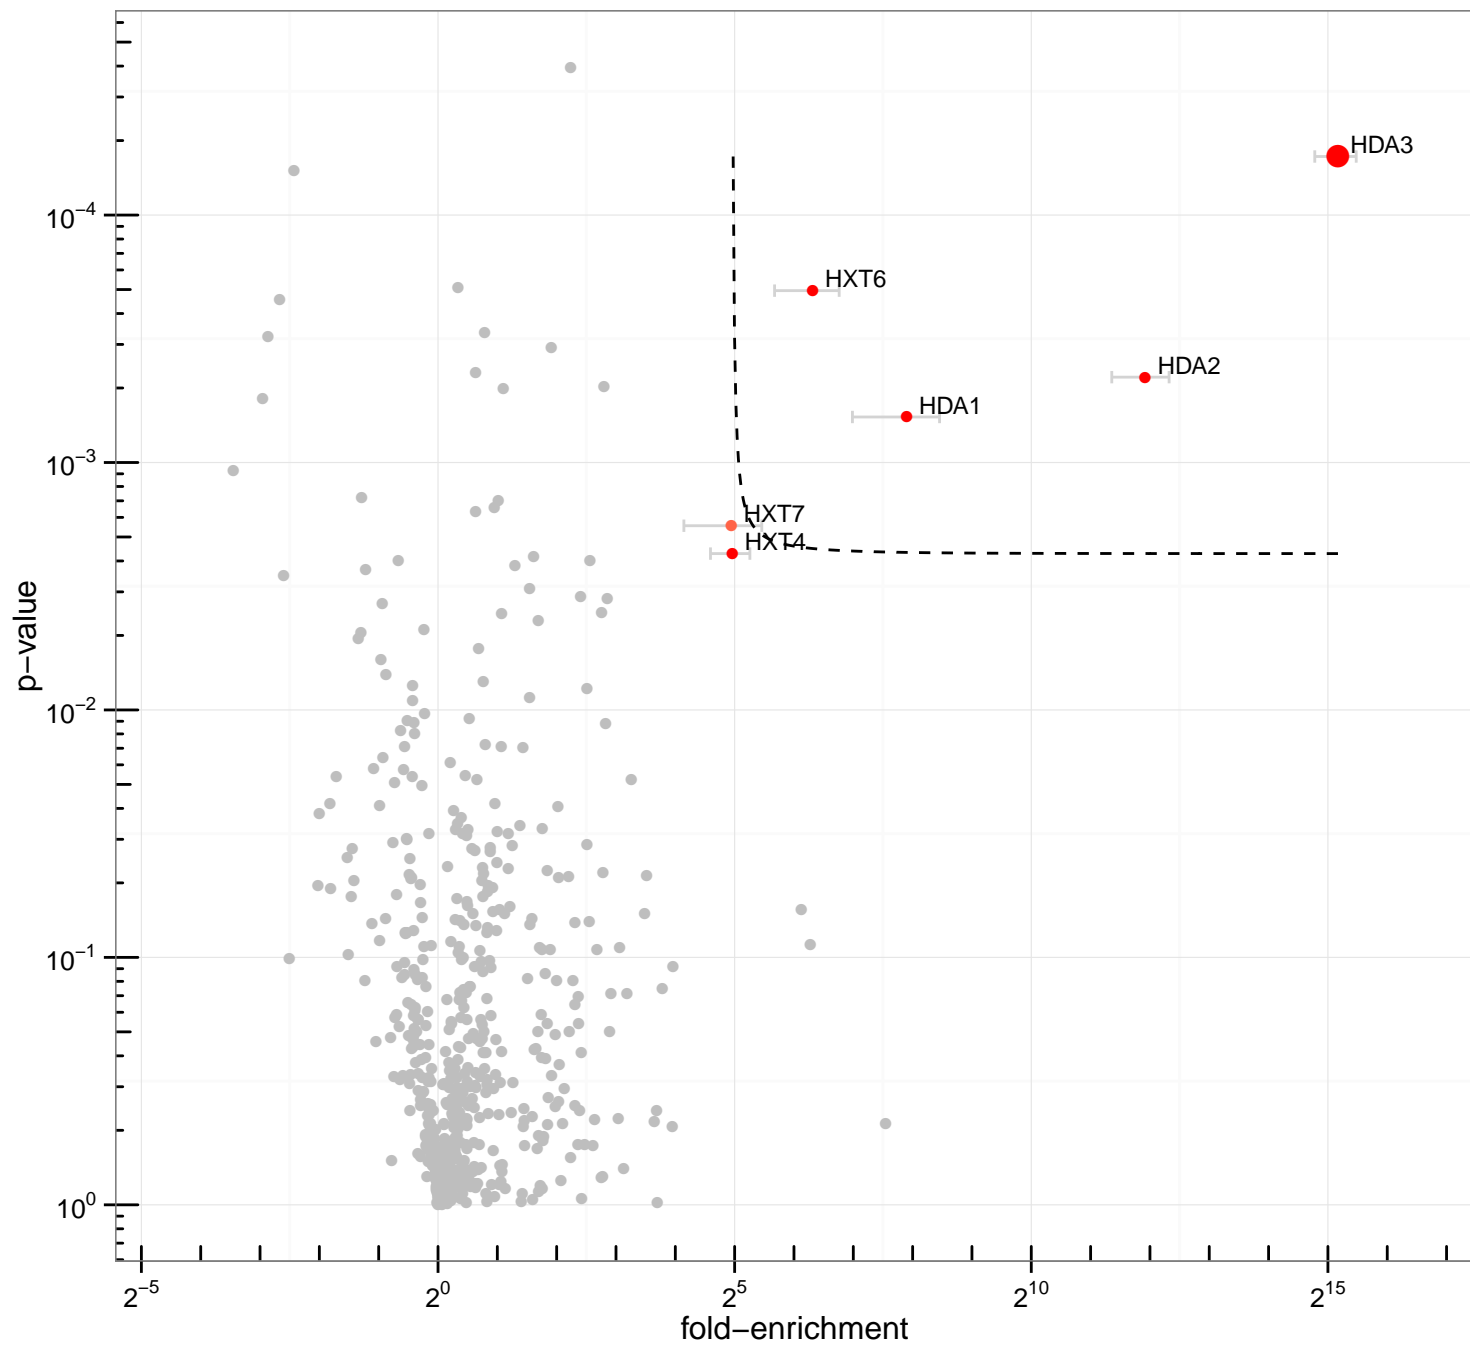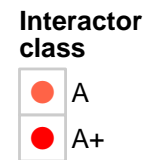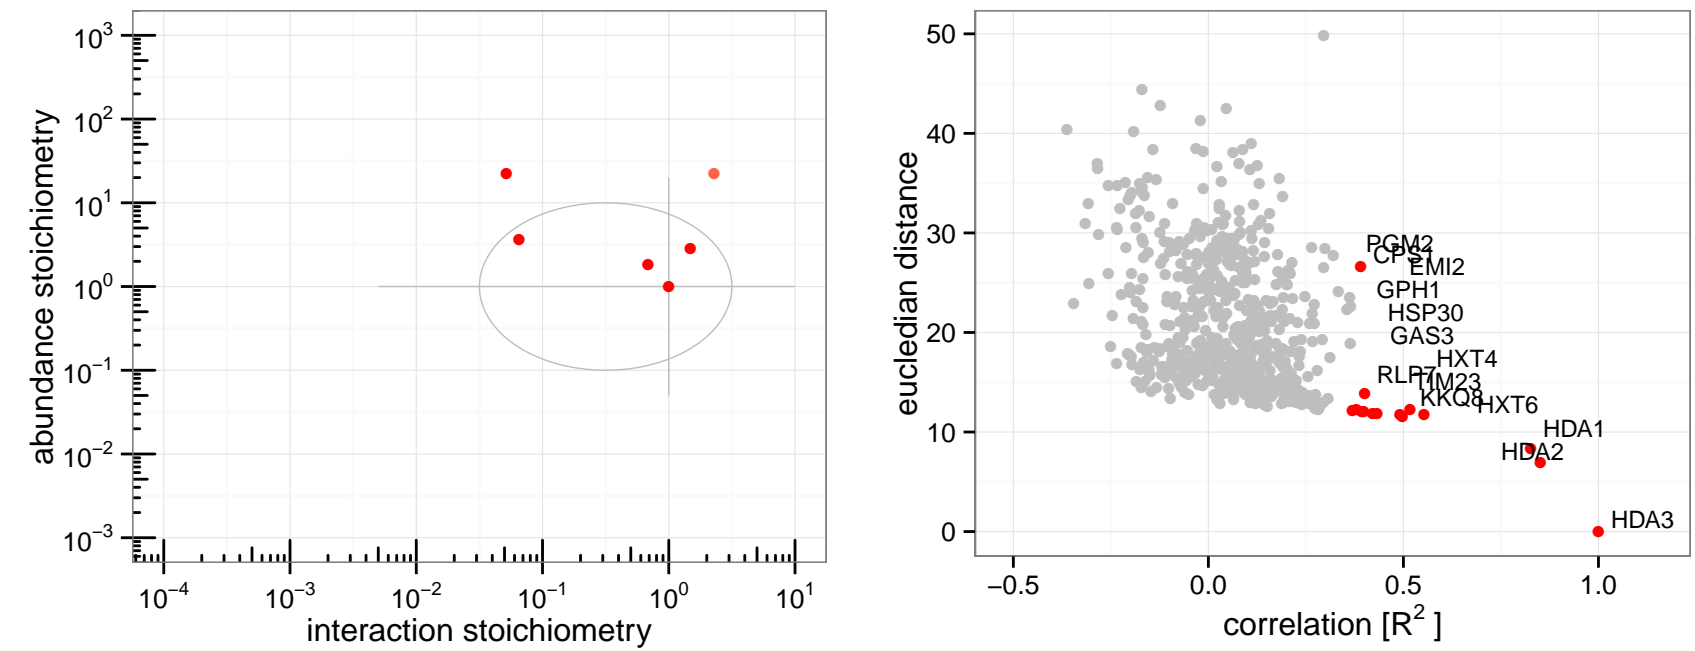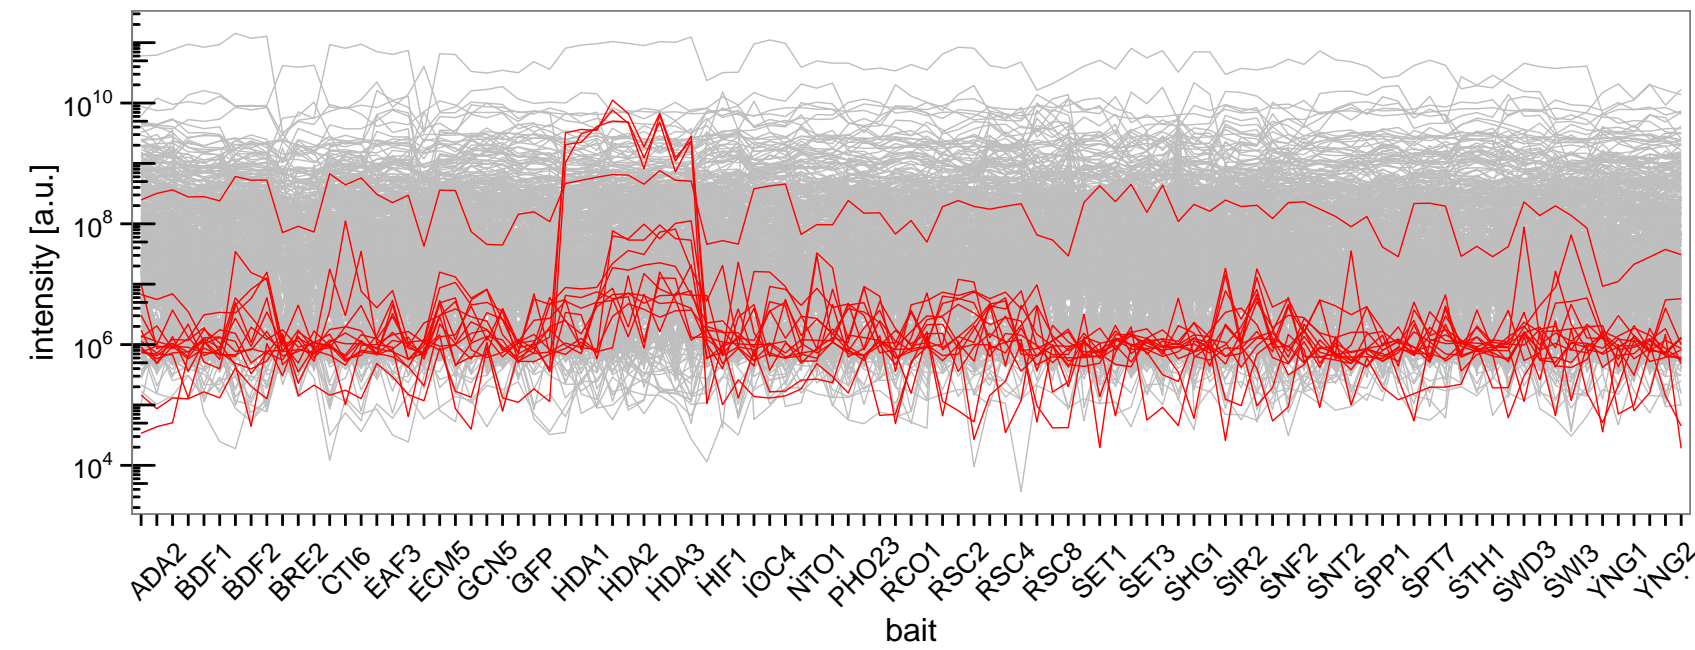

|                         | HDA1 | HDA2 | HDA3 | HXT4 | HXT6 | HXT7 |
|-------------------------|------|------|------|------|------|------|
| <i>significance</i>     | 7.6  | 11.0 | 15.0 | 4.8  | 6.5  | 4.8  |
| <i>interactor class</i> | A+   | A+   | A+   | A+   | A+   | A    |

|                   |            |
|-------------------|------------|
| <b>bait</b>       | HIF1       |
| <b>experiment</b> | 27 minutes |

|                    |      |
|--------------------|------|
| <b>interactors</b> | 5    |
| <b>recovery</b>    | 33 % |

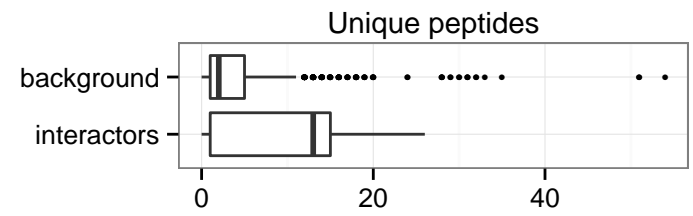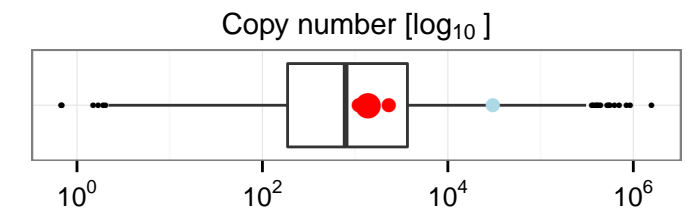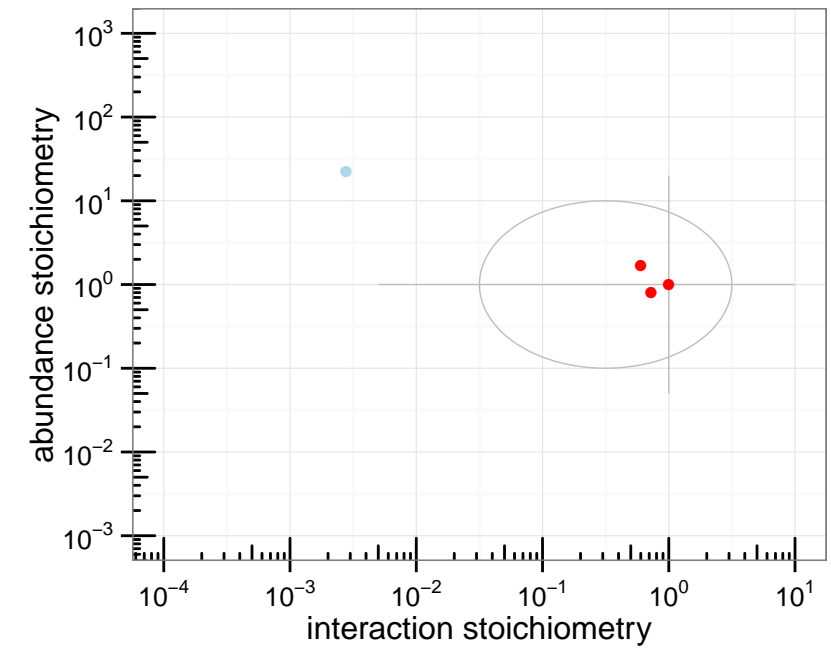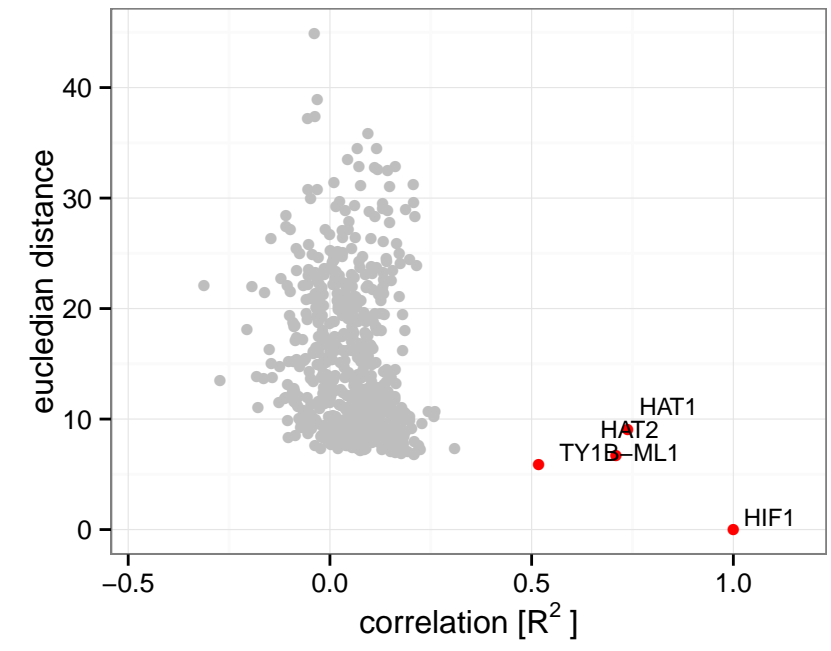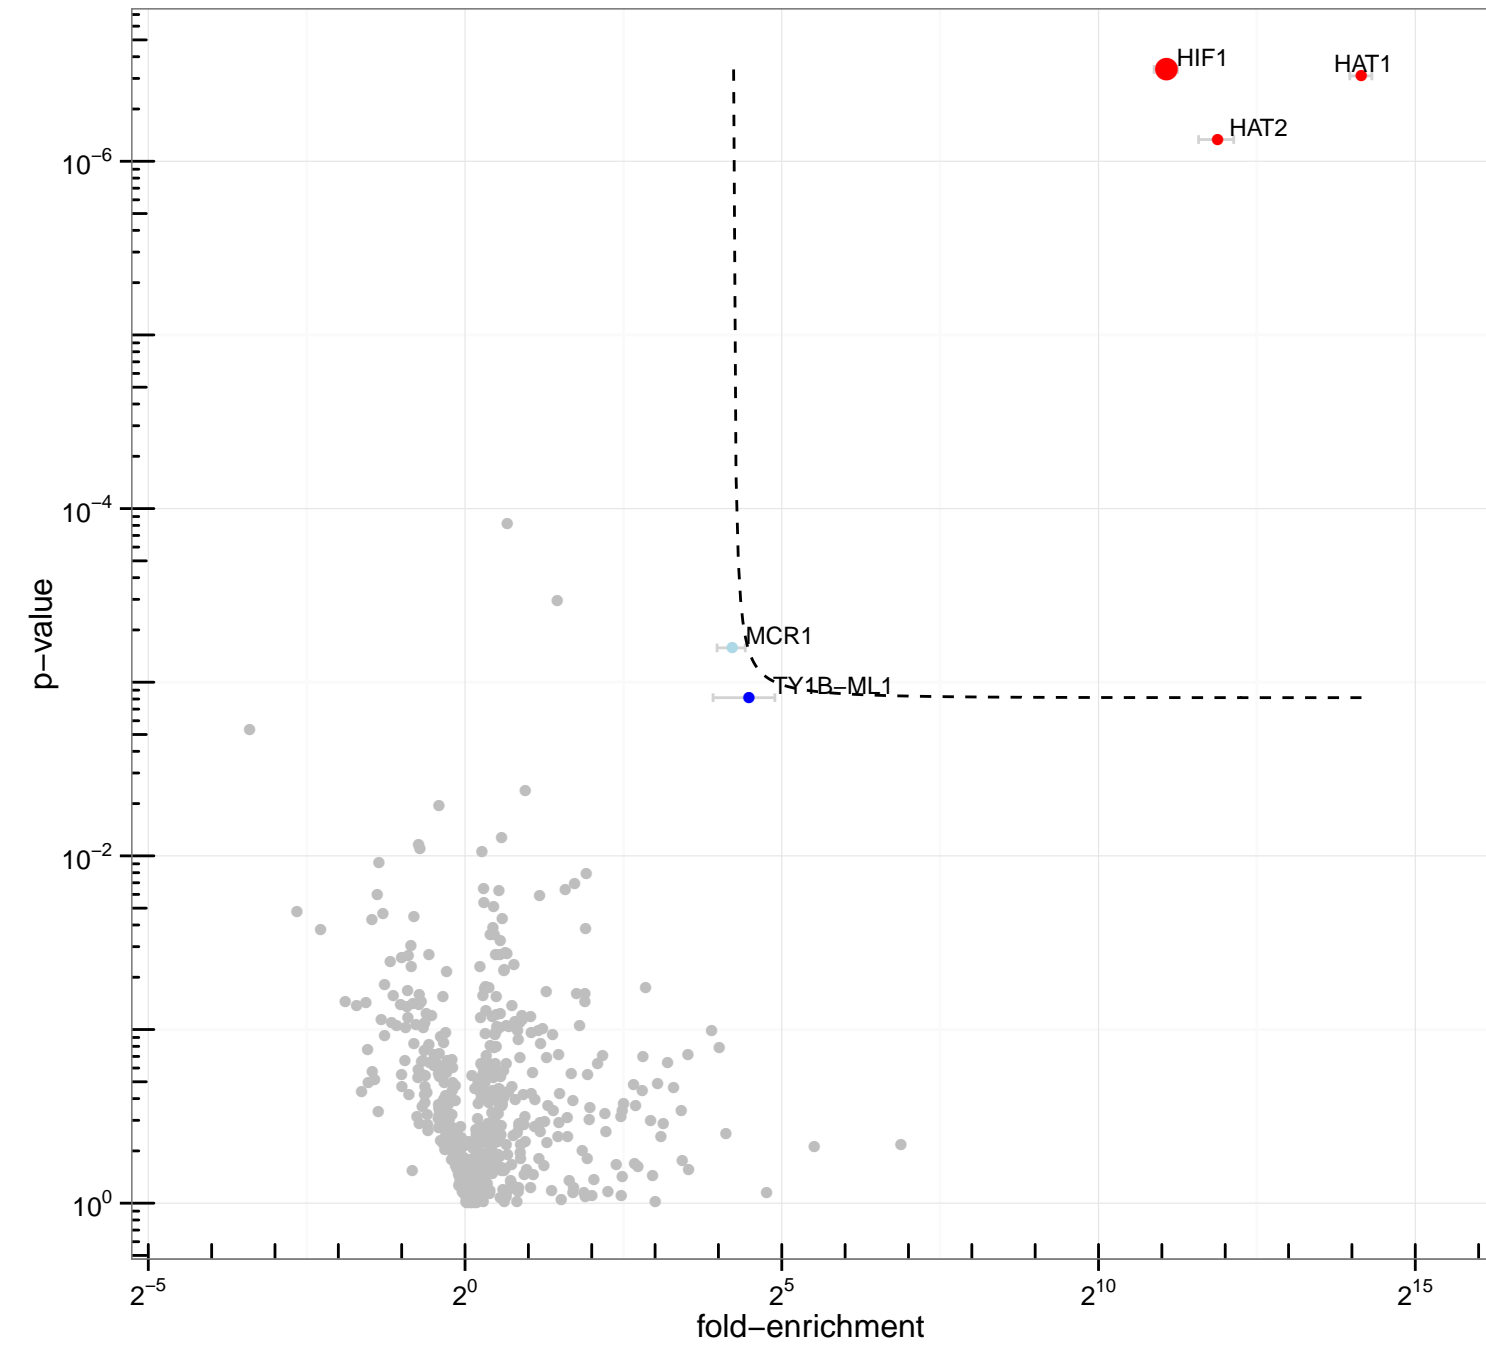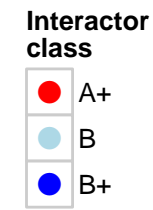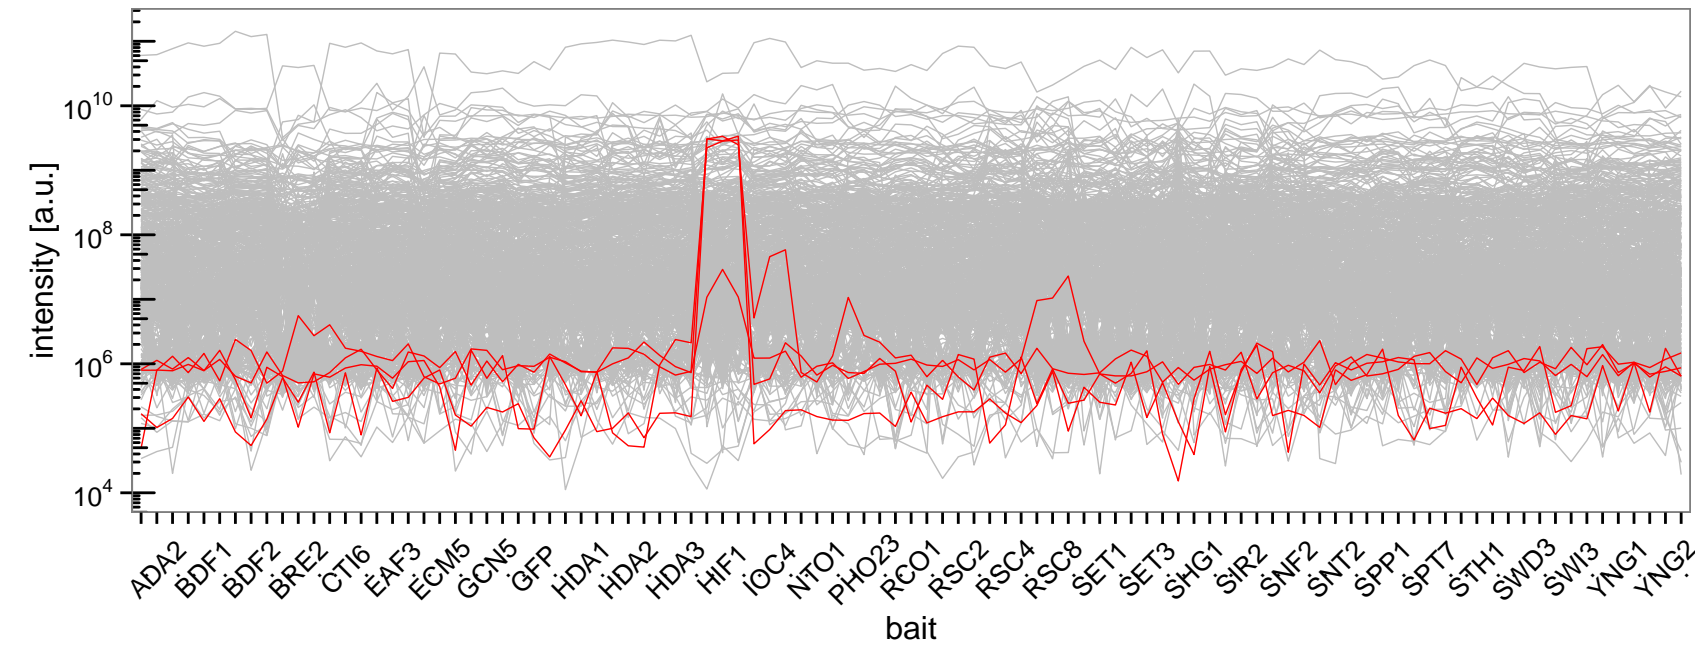

|                         | HAT1 | HAT2 | HIF1 | TY1B-ML1 |
|-------------------------|------|------|------|----------|
| <i>significance</i>     | 15.0 | 12.0 | 12.0 | 4.5      |
| <i>interactor class</i> | A+   | A+   | A+   | B+       |



|                   |            |
|-------------------|------------|
| <b>bait</b>       | IOC4       |
| <b>experiment</b> | 27 minutes |

|                    |     |
|--------------------|-----|
| <b>interactors</b> | 0   |
| <b>recovery</b>    | 0 % |

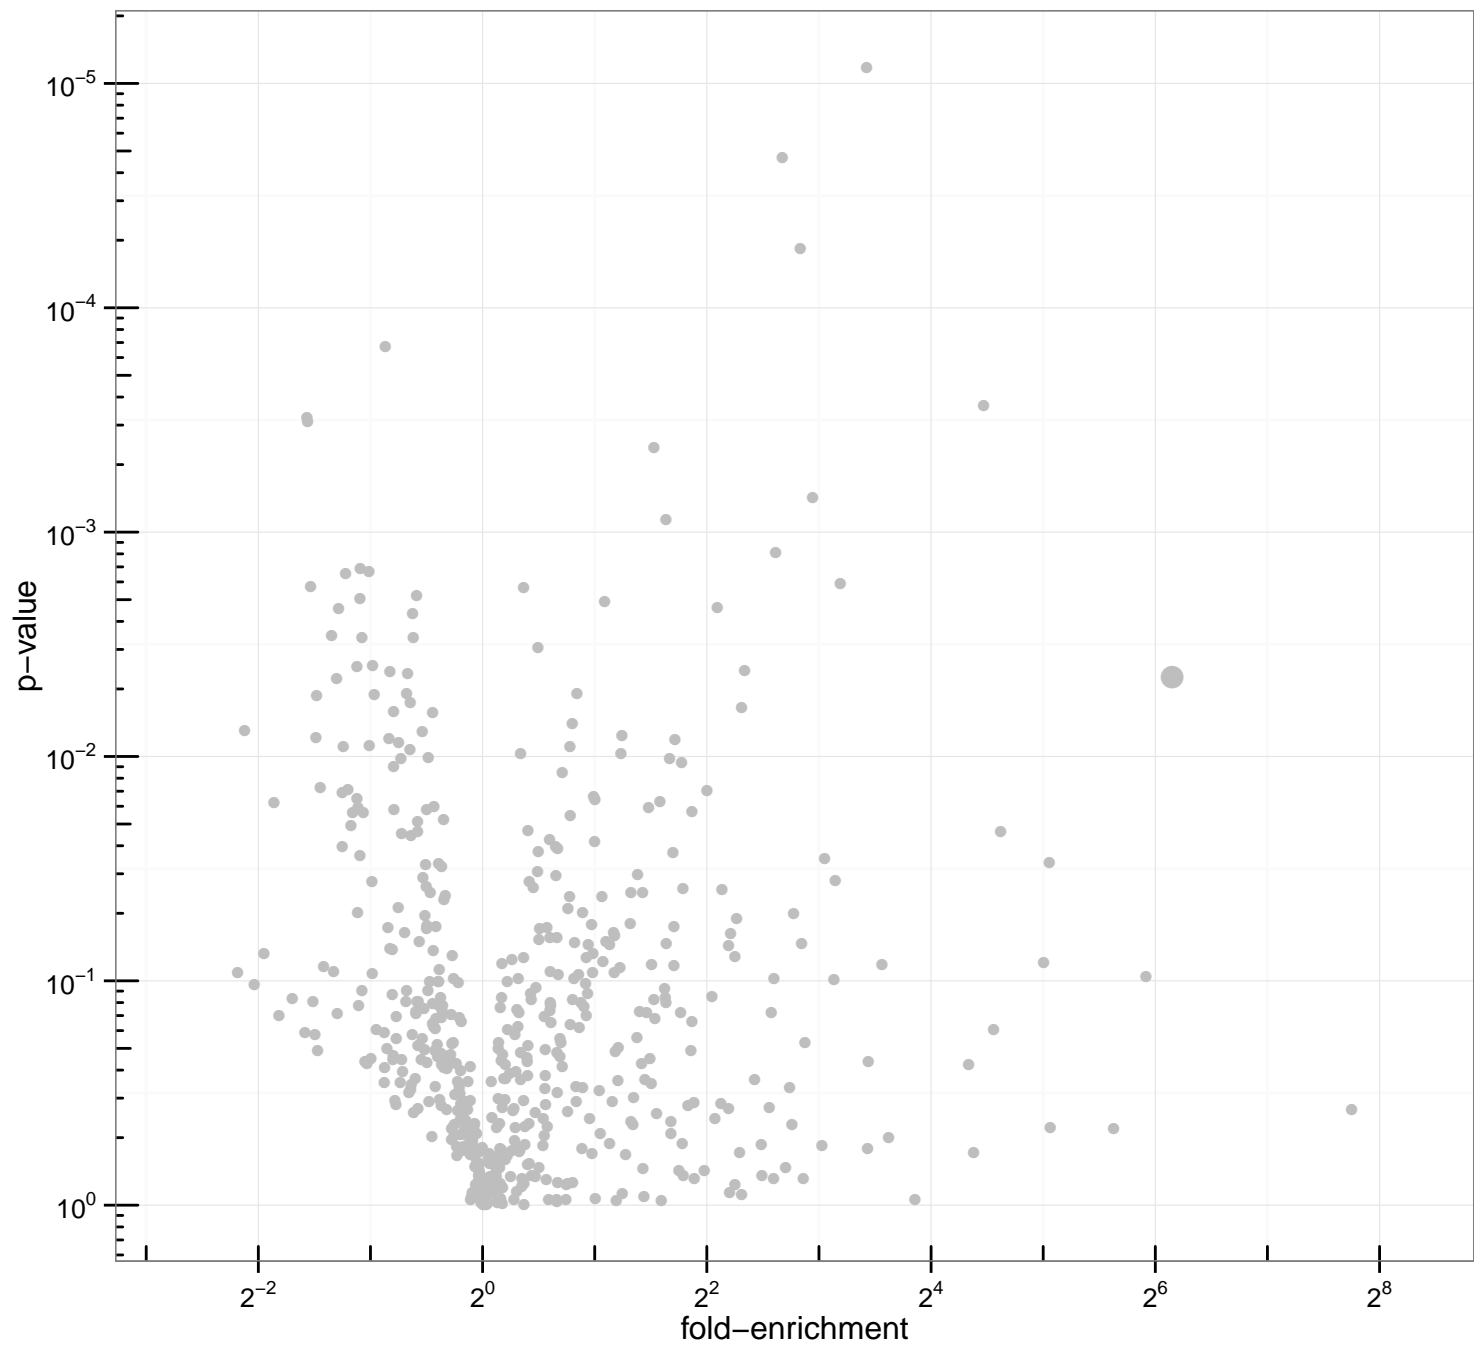

**Interactor class**  
 -

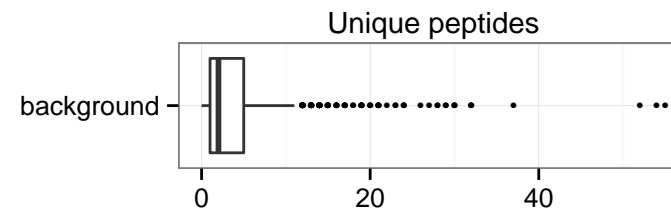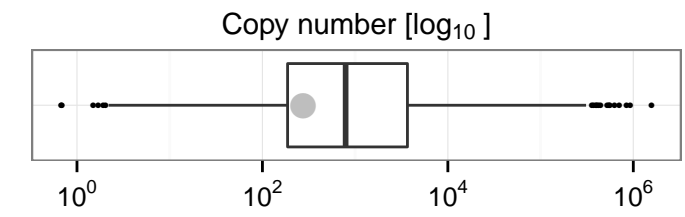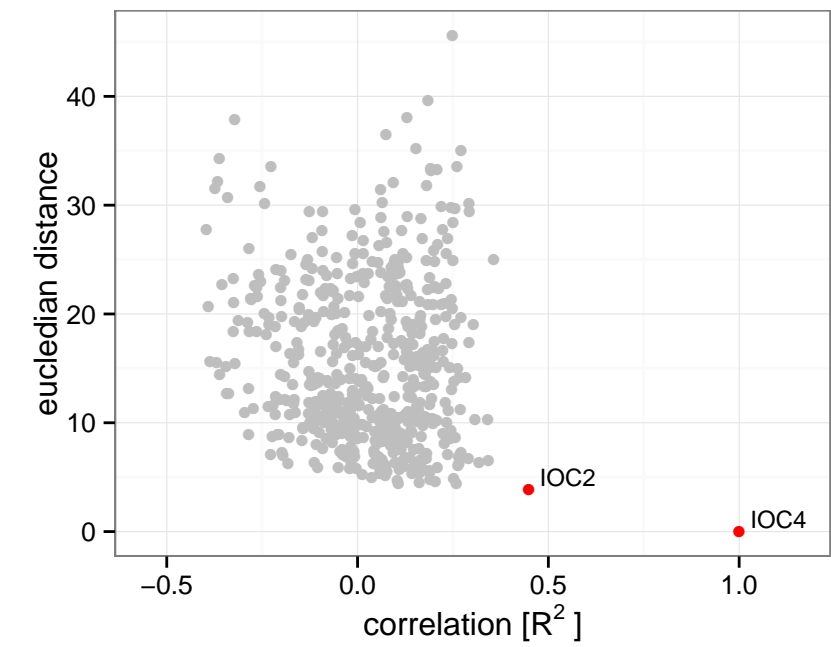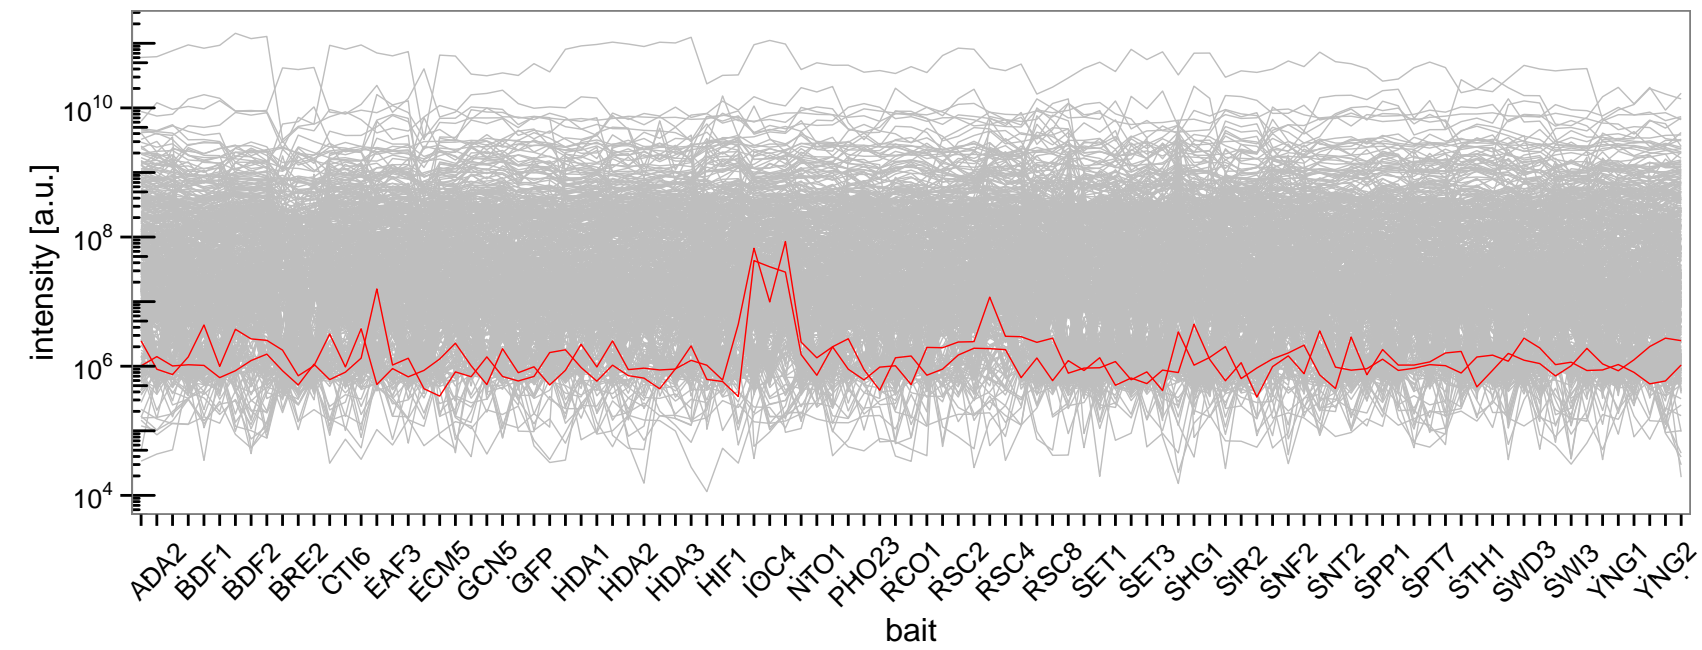

*significance*  
*interactor class*

|                   |            |
|-------------------|------------|
| <b>bait</b>       | NTO1       |
| <b>experiment</b> | 27 minutes |

|                    |       |
|--------------------|-------|
| <b>interactors</b> | 0     |
| <b>recovery</b>    | NaN % |

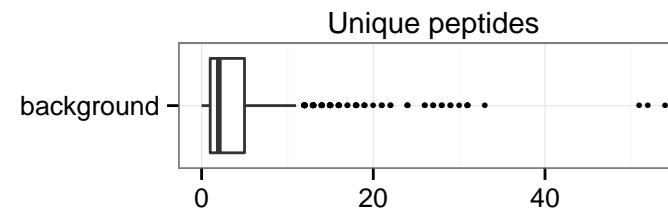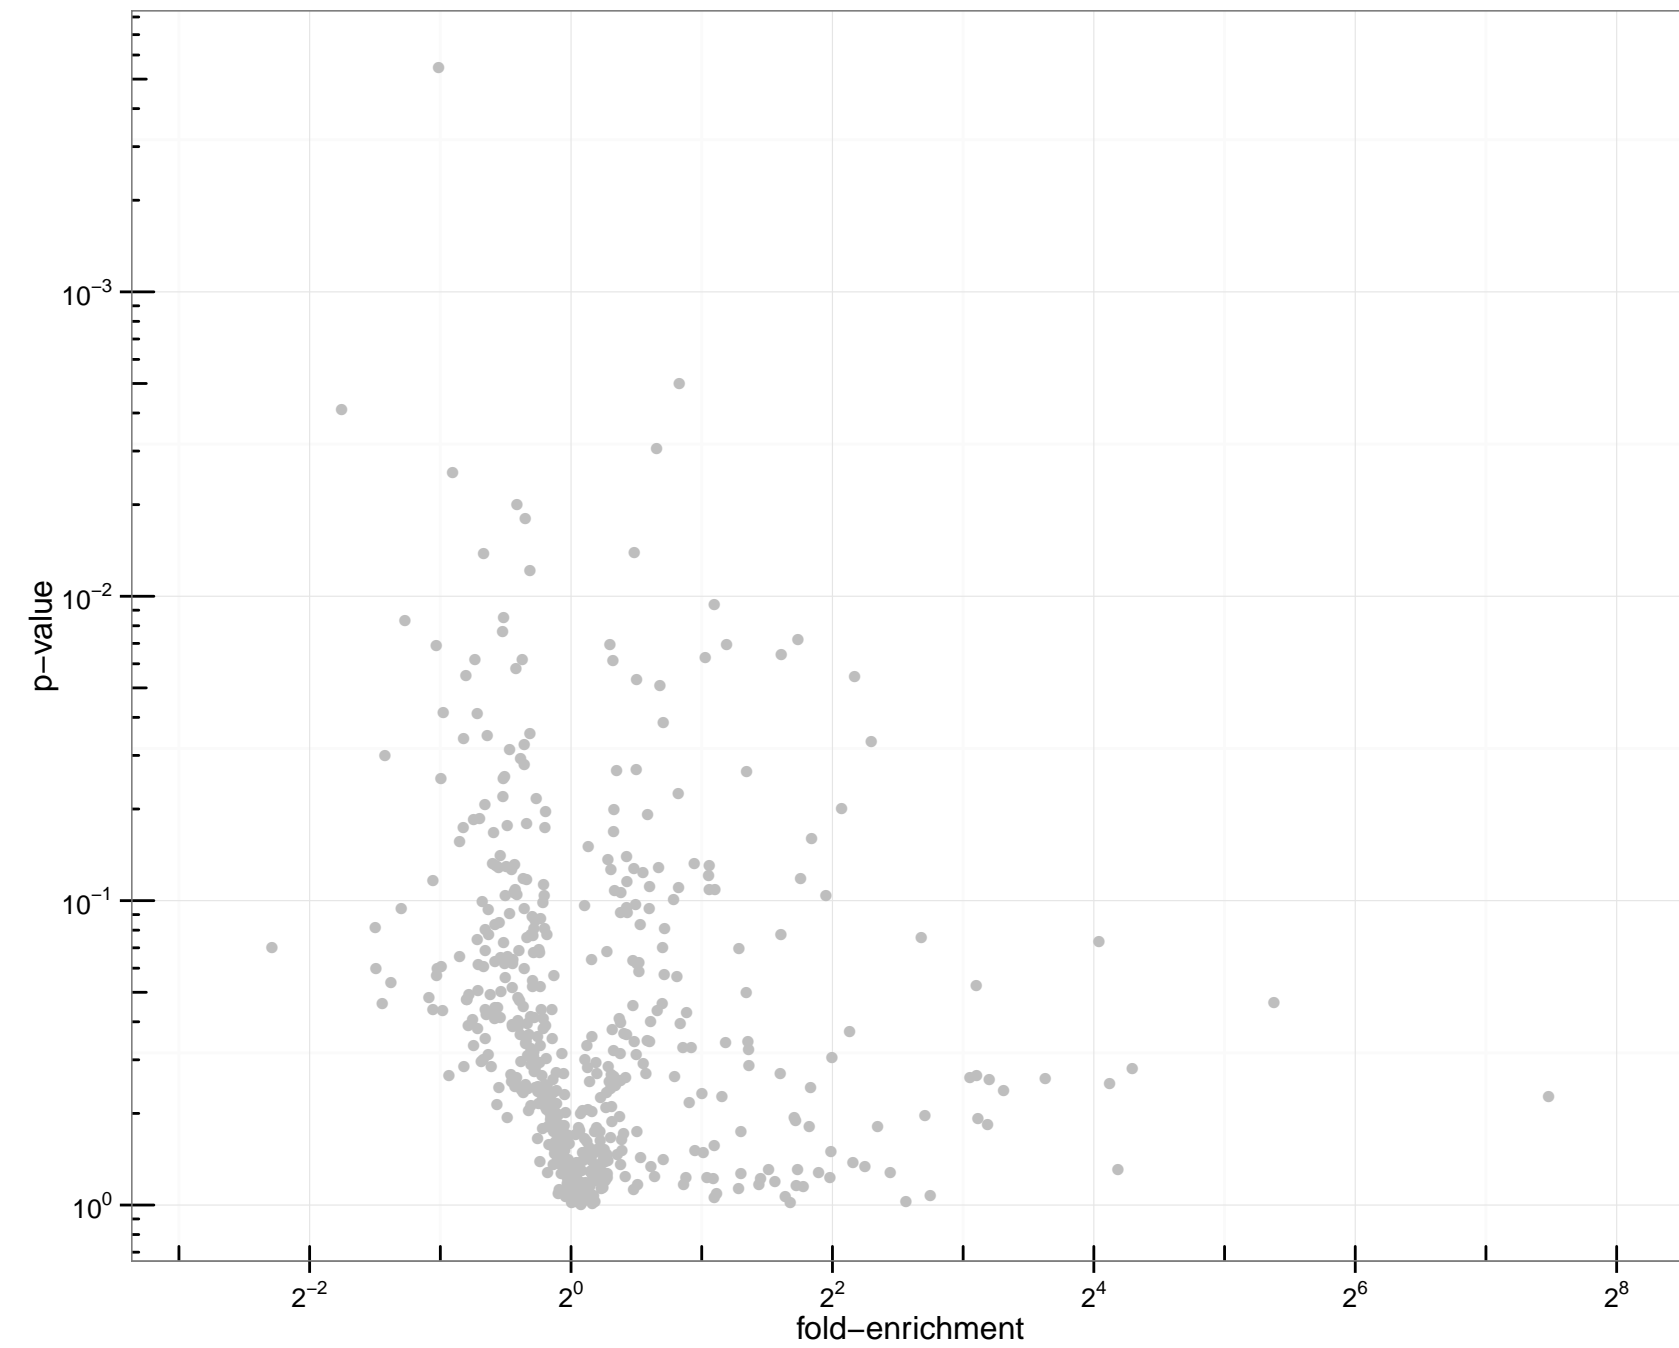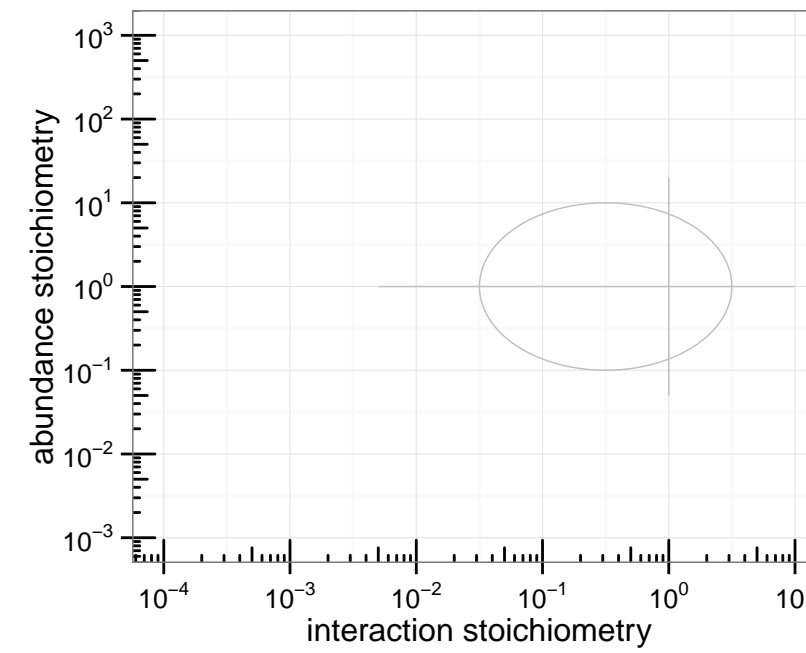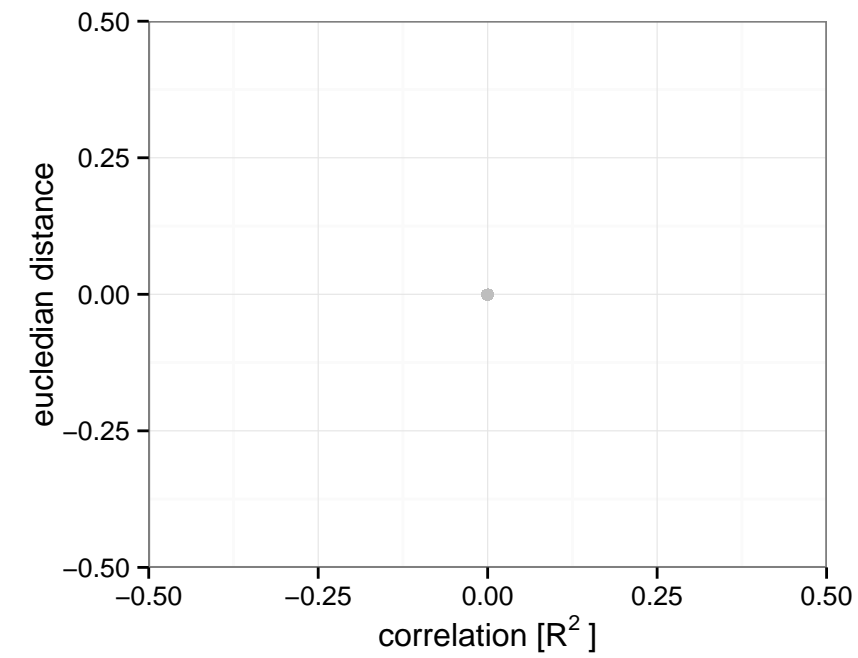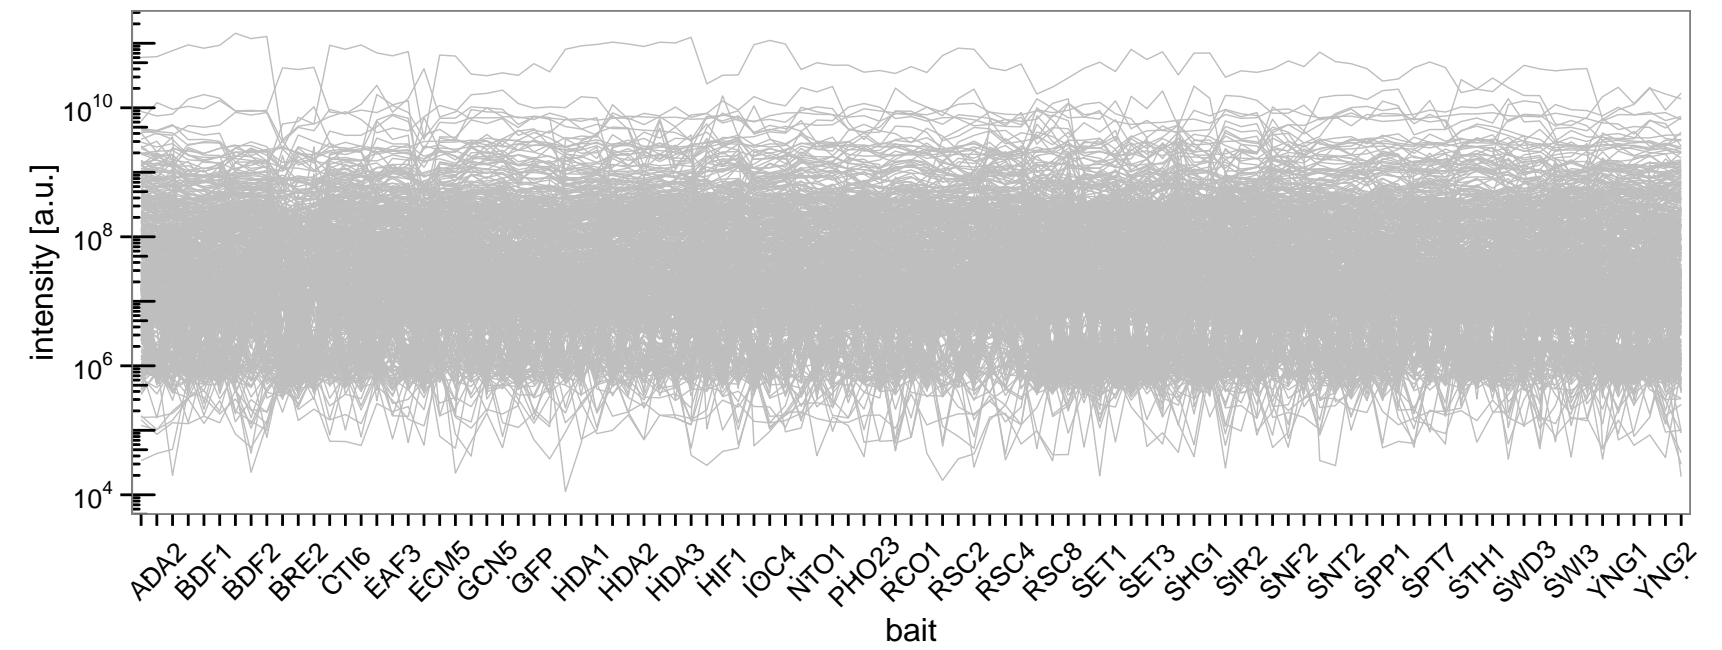

significance

interactor class

|                   |            |
|-------------------|------------|
| <b>bait</b>       | PHO23      |
| <b>experiment</b> | 27 minutes |

|                    |      |
|--------------------|------|
| <b>interactors</b> | 10   |
| <b>recovery</b>    | 38 % |

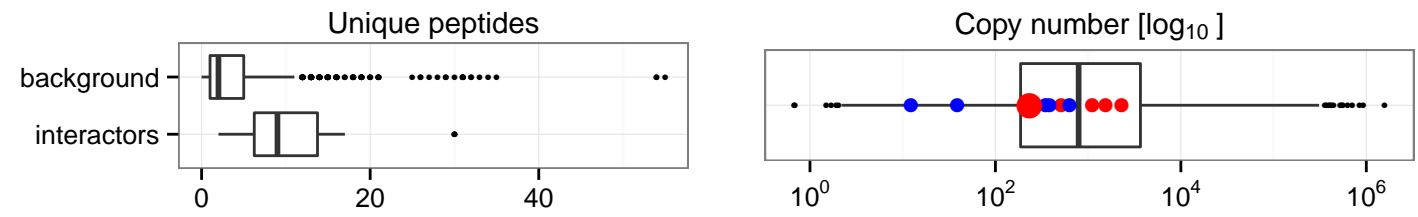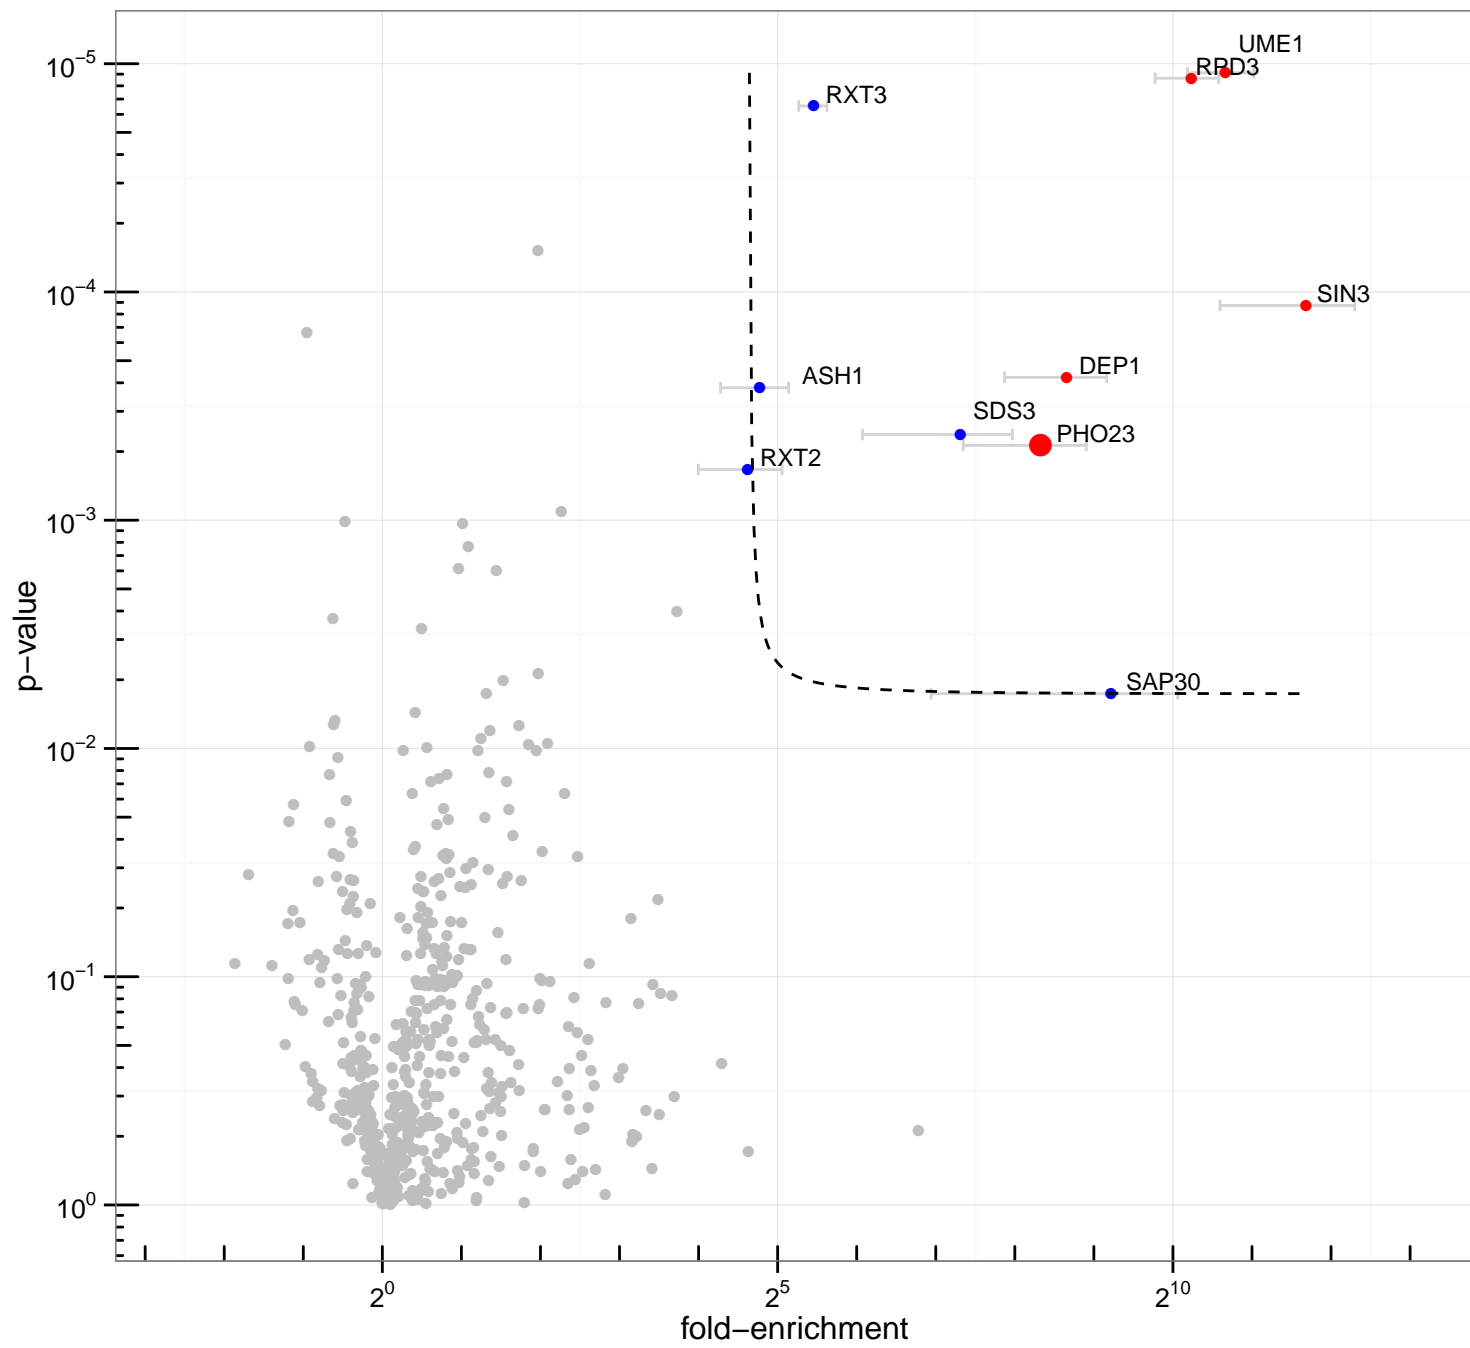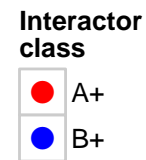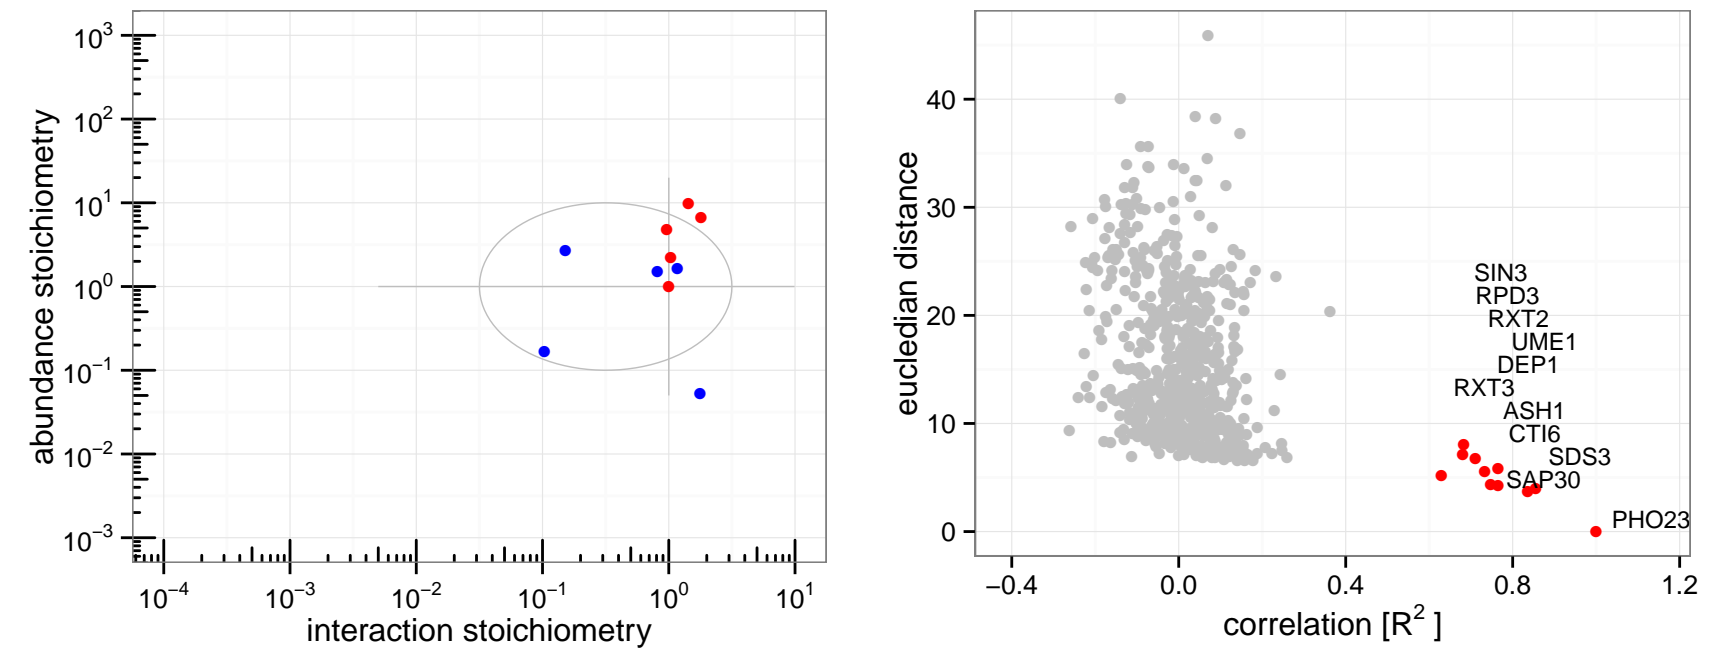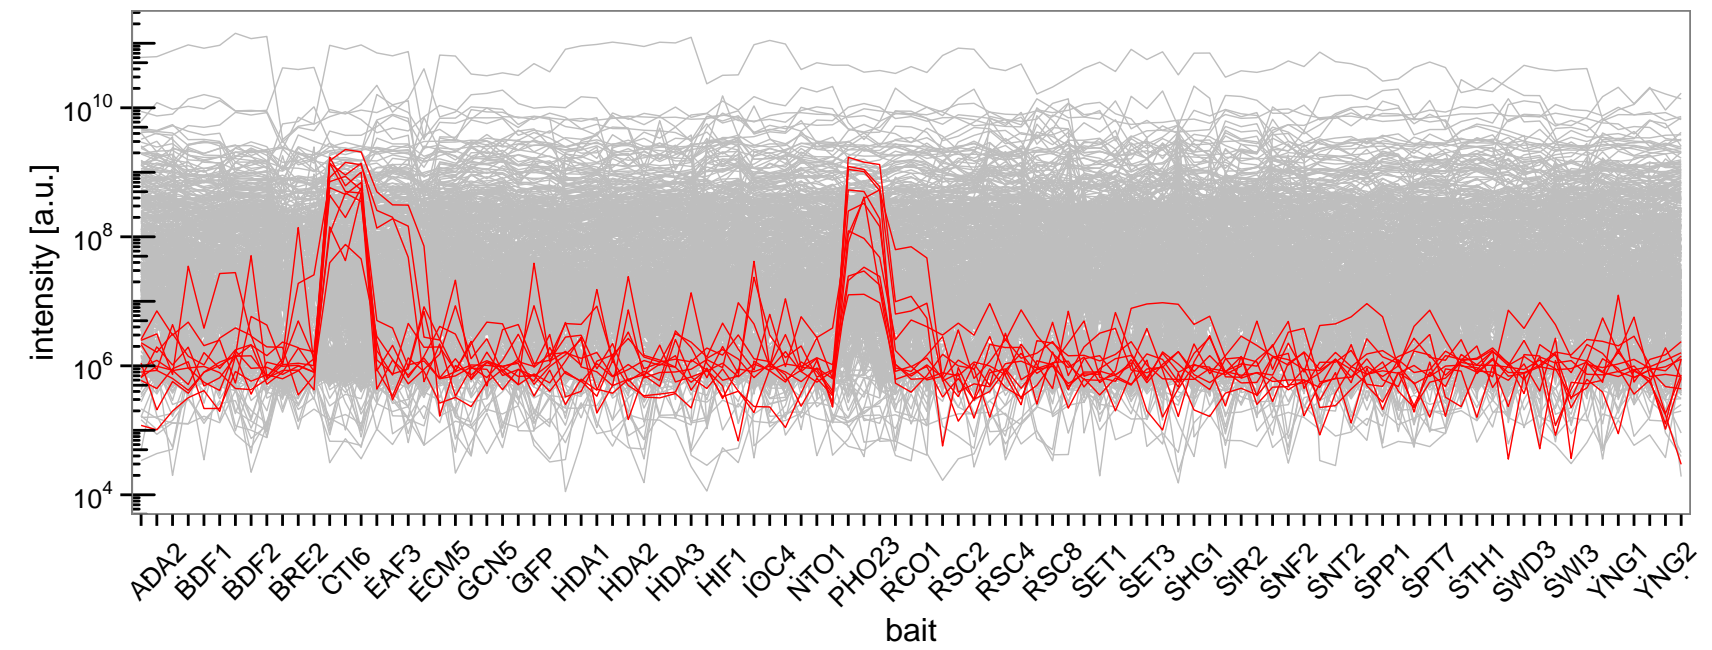

|                         | ASH1 | DEP1 | PHO23 | RPD3 | RXT2 | RXT3 | SAP30 | SDS3 | SIN3 | UME1 |
|-------------------------|------|------|-------|------|------|------|-------|------|------|------|
| <i>significance</i>     | 5.2  | 8.5  | 8.0   | 10.0 | 4.8  | 6.6  | 8.5   | 7.2  | 11.0 | 11.0 |
| <i>interactor class</i> | B+   | A+   | A+    | A+   | B+   | B+   | B+    | B+   | A+   | A+   |



|                   |            |
|-------------------|------------|
| <b>bait</b>       | RCO1       |
| <b>experiment</b> | 27 minutes |

|                    |      |
|--------------------|------|
| <b>interactors</b> | 3    |
| <b>recovery</b>    | 11 % |

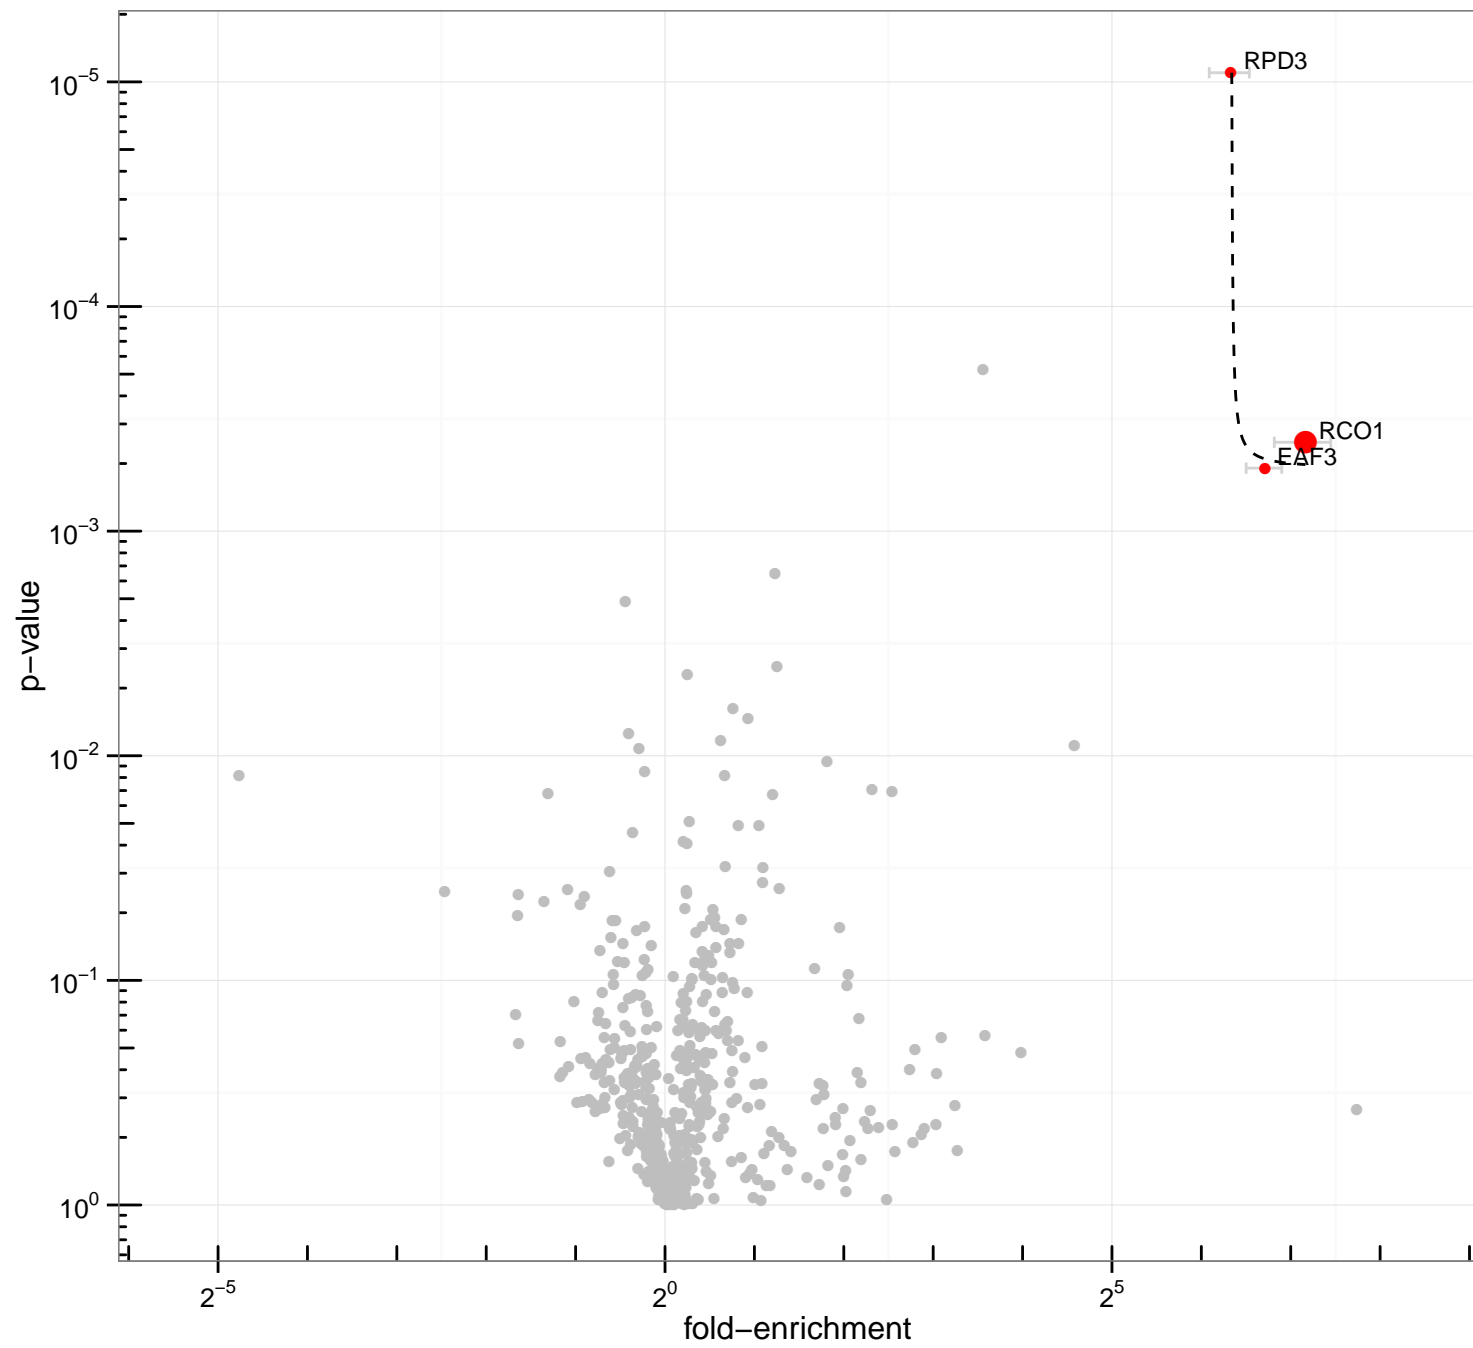

**Interactor class**  
● A+

|                         | EAF3 | RCO1 | RPD3 |
|-------------------------|------|------|------|
| <i>significance</i>     | 6.6  | 7.0  | 7.3  |
| <i>interactor class</i> | A+   | A+   | A+   |

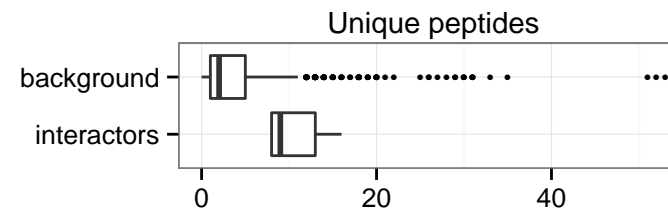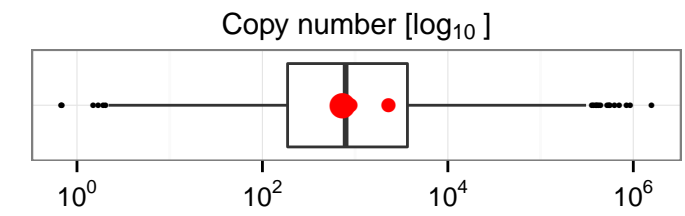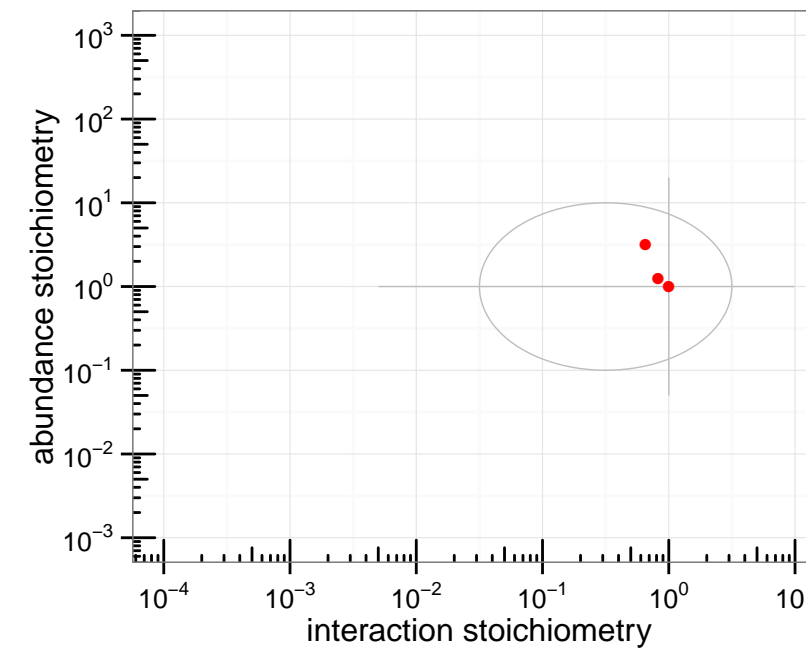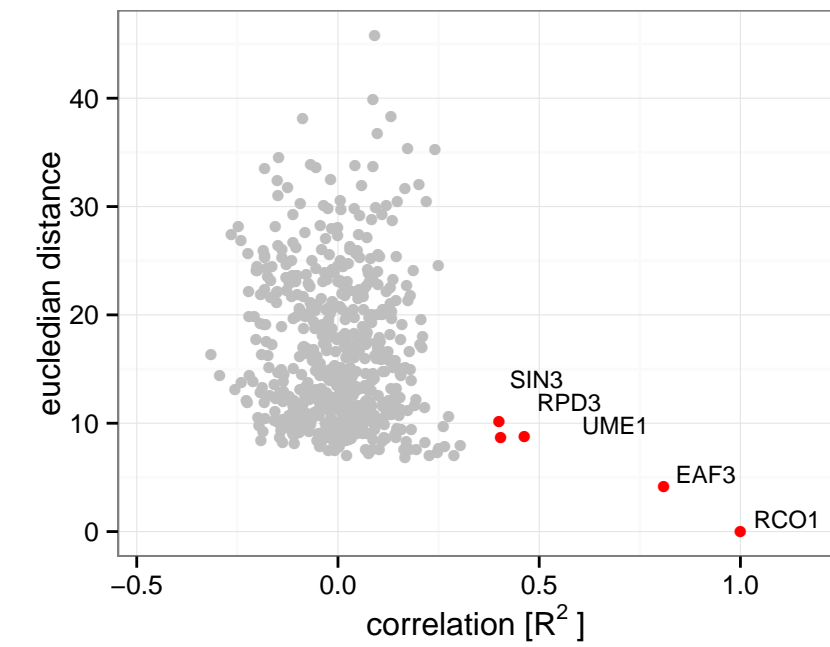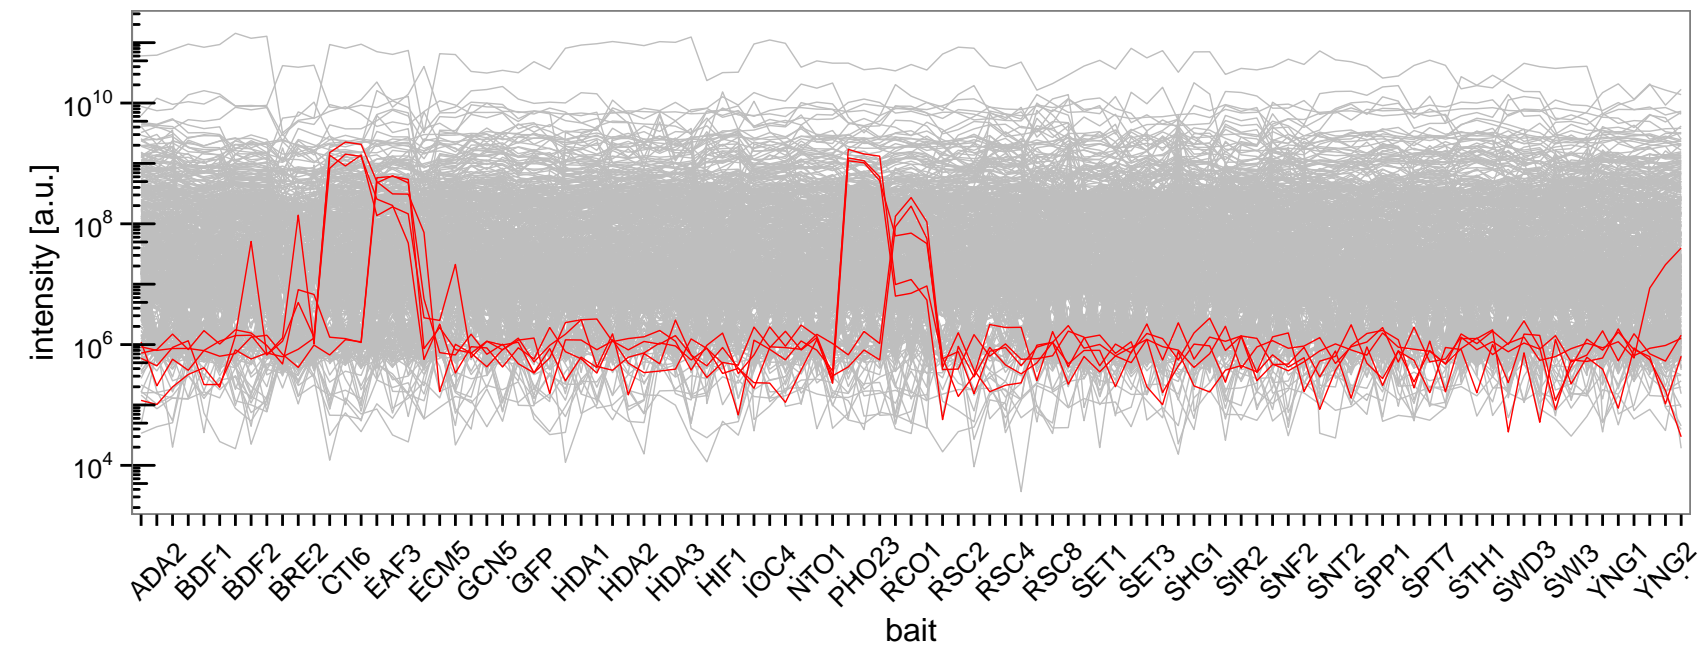



|                   |            |
|-------------------|------------|
| <b>bait</b>       | RSC4       |
| <b>experiment</b> | 27 minutes |

|                    |      |
|--------------------|------|
| <b>interactors</b> | 26   |
| <b>recovery</b>    | 94 % |

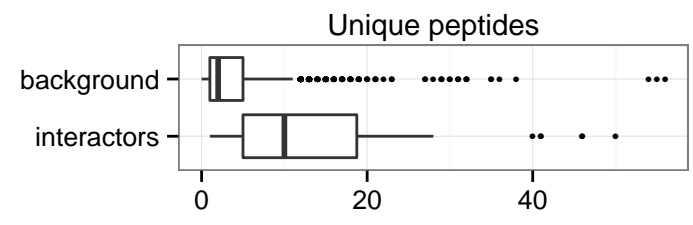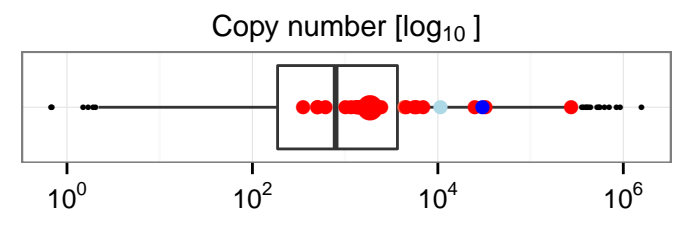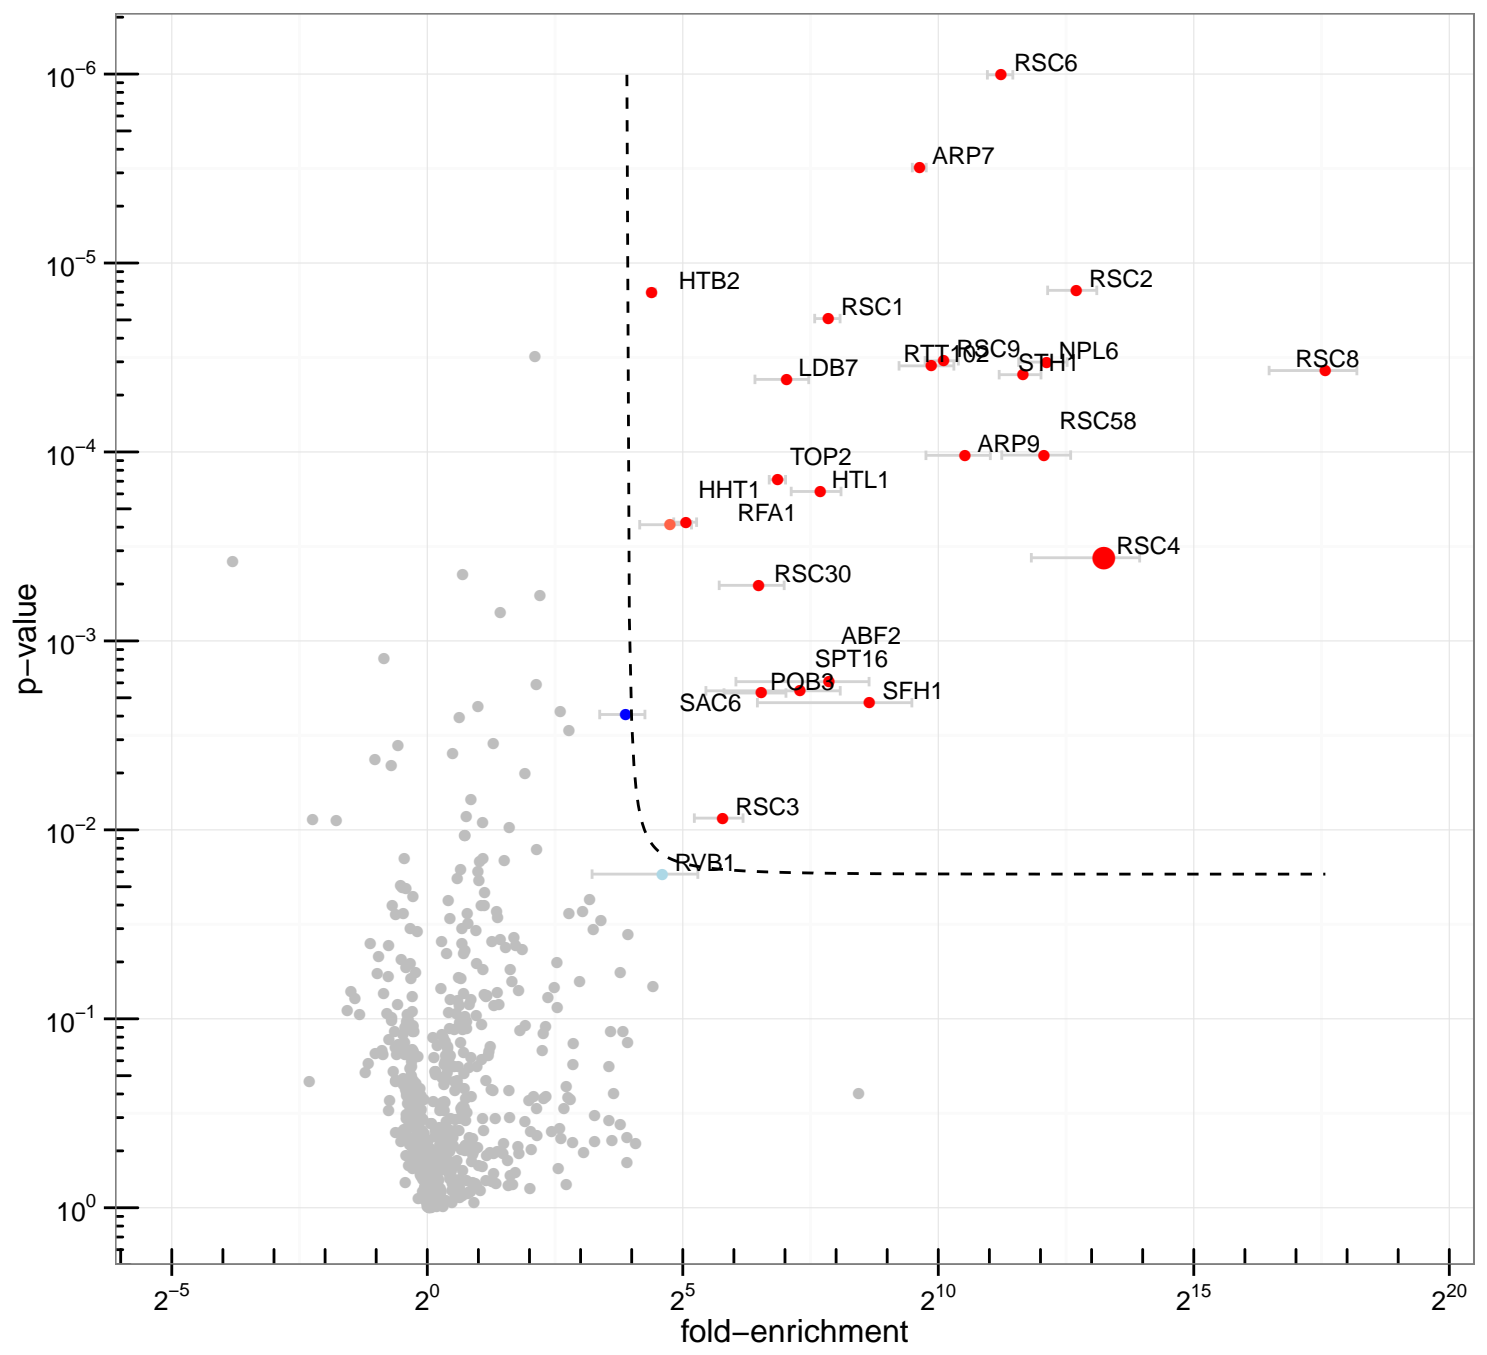

**Interactor class**

- A
- A+
- B
- B+

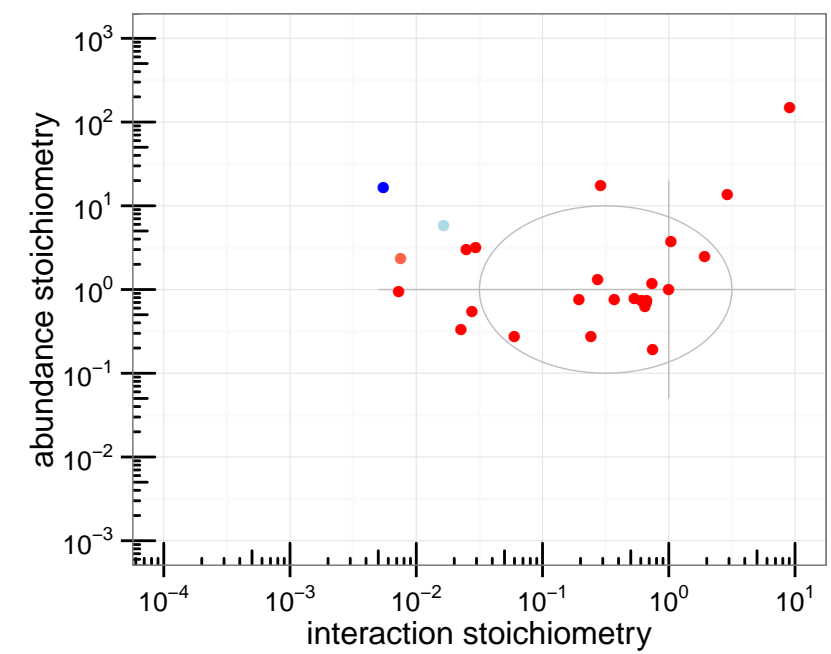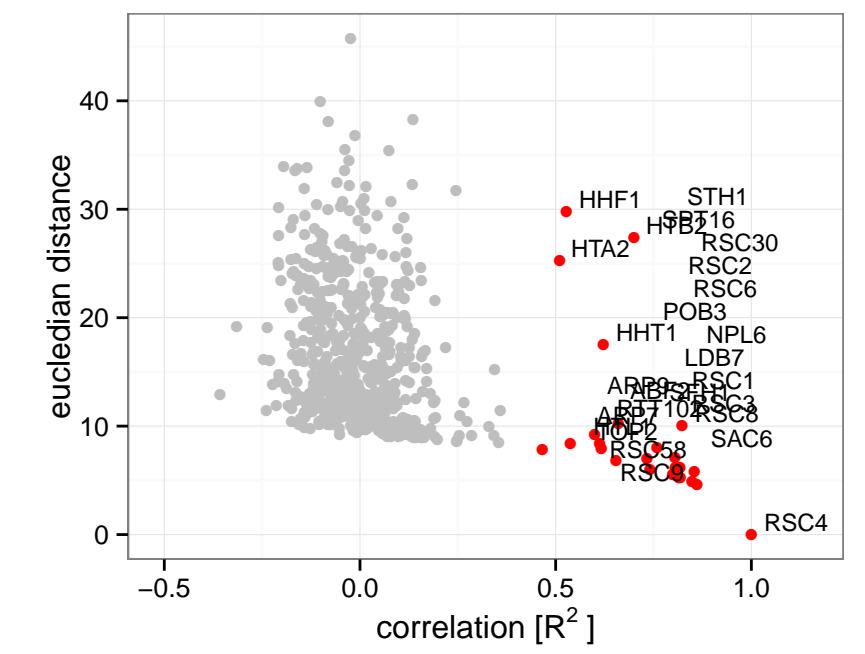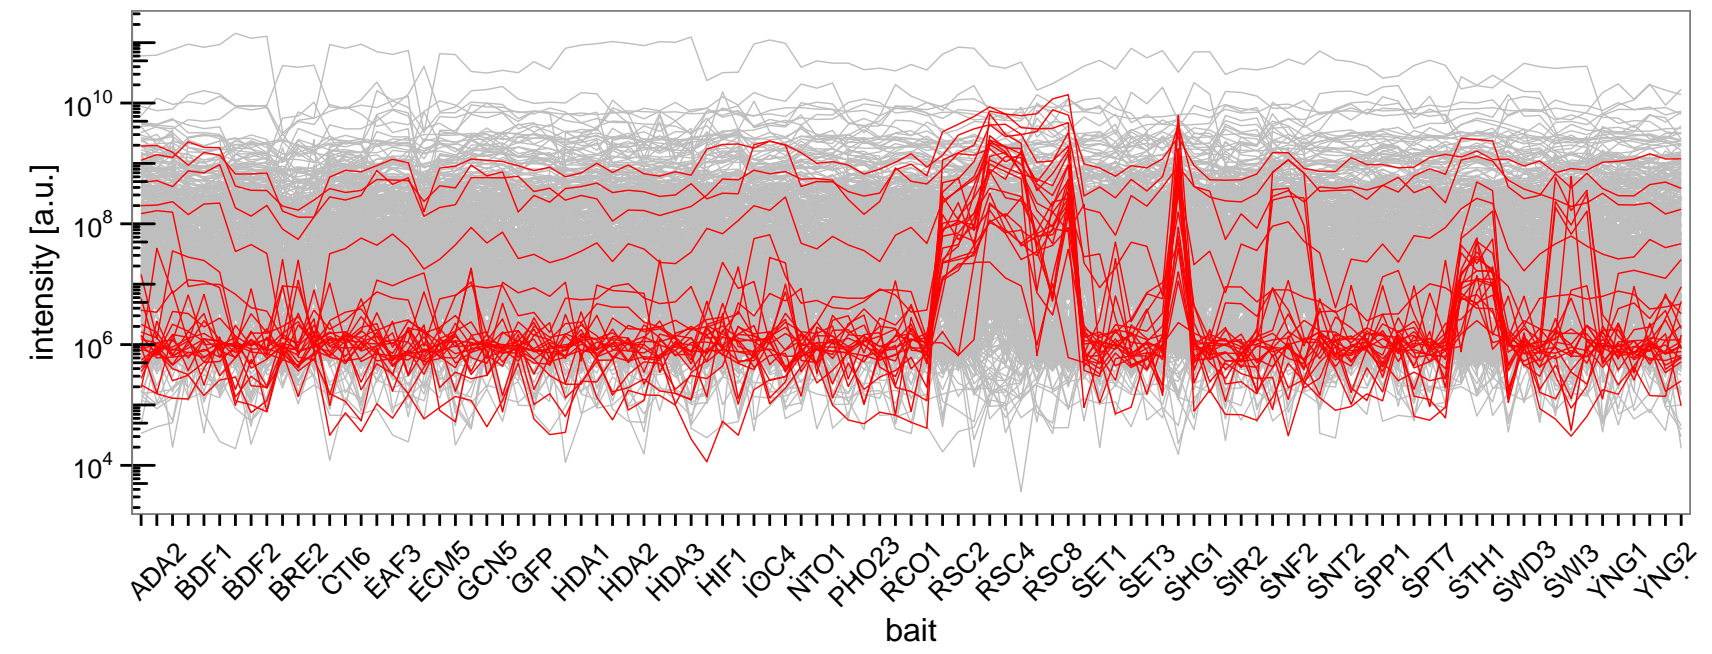

|                         | ABF2 | ARP7 | ARP9 | HHT1 | HTB2 | HTL1 | LDB7 | NPL6 | POB3 | RFA1 | RSC1 | RSC2 | RSC3 | RSC30 | RSC4 | RSC58 | RSC6 | RSC8 | RSC9 | RTT102 | SAC6 | SFH1 | SPT16 | STH1 | TOP2 |
|-------------------------|------|------|------|------|------|------|------|------|------|------|------|------|------|-------|------|-------|------|------|------|--------|------|------|-------|------|------|
| <i>significance</i>     | 7.4  | 10.0 | 10.0 | 5.4  | 5.9  | 7.7  | 7.5  | 12.0 | 6.2  | 5.2  | 8.3  | 13.0 | 5.2  | 6.4   | 13.0 | 12.0  | 12.0 | 17.0 | 10.0 | 9.9    | 3.9  | 8.1  | 6.9   | 12.0 | 7.0  |
| <i>interactor class</i> | A+   | A+   | A+   | A+   | A+   | A+   | A+   | A+   | A+   | A    | A+   | A+   | A+   | A+    | A+   | A+    | A+   | A+   | A+   | A+     | B+   | A+   | A+    | A+   | A+   |



|                   |            |
|-------------------|------------|
| <b>bait</b>       | RSC8       |
| <b>experiment</b> | 27 minutes |

|                    |      |
|--------------------|------|
| <b>interactors</b> | 23   |
| <b>recovery</b>    | 82 % |

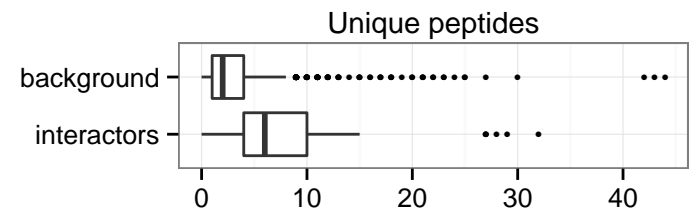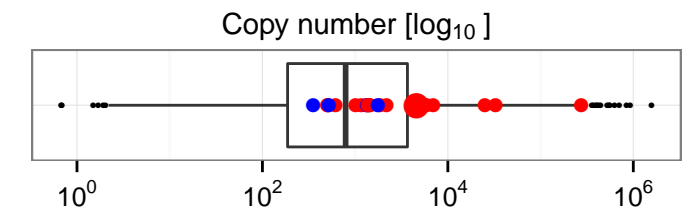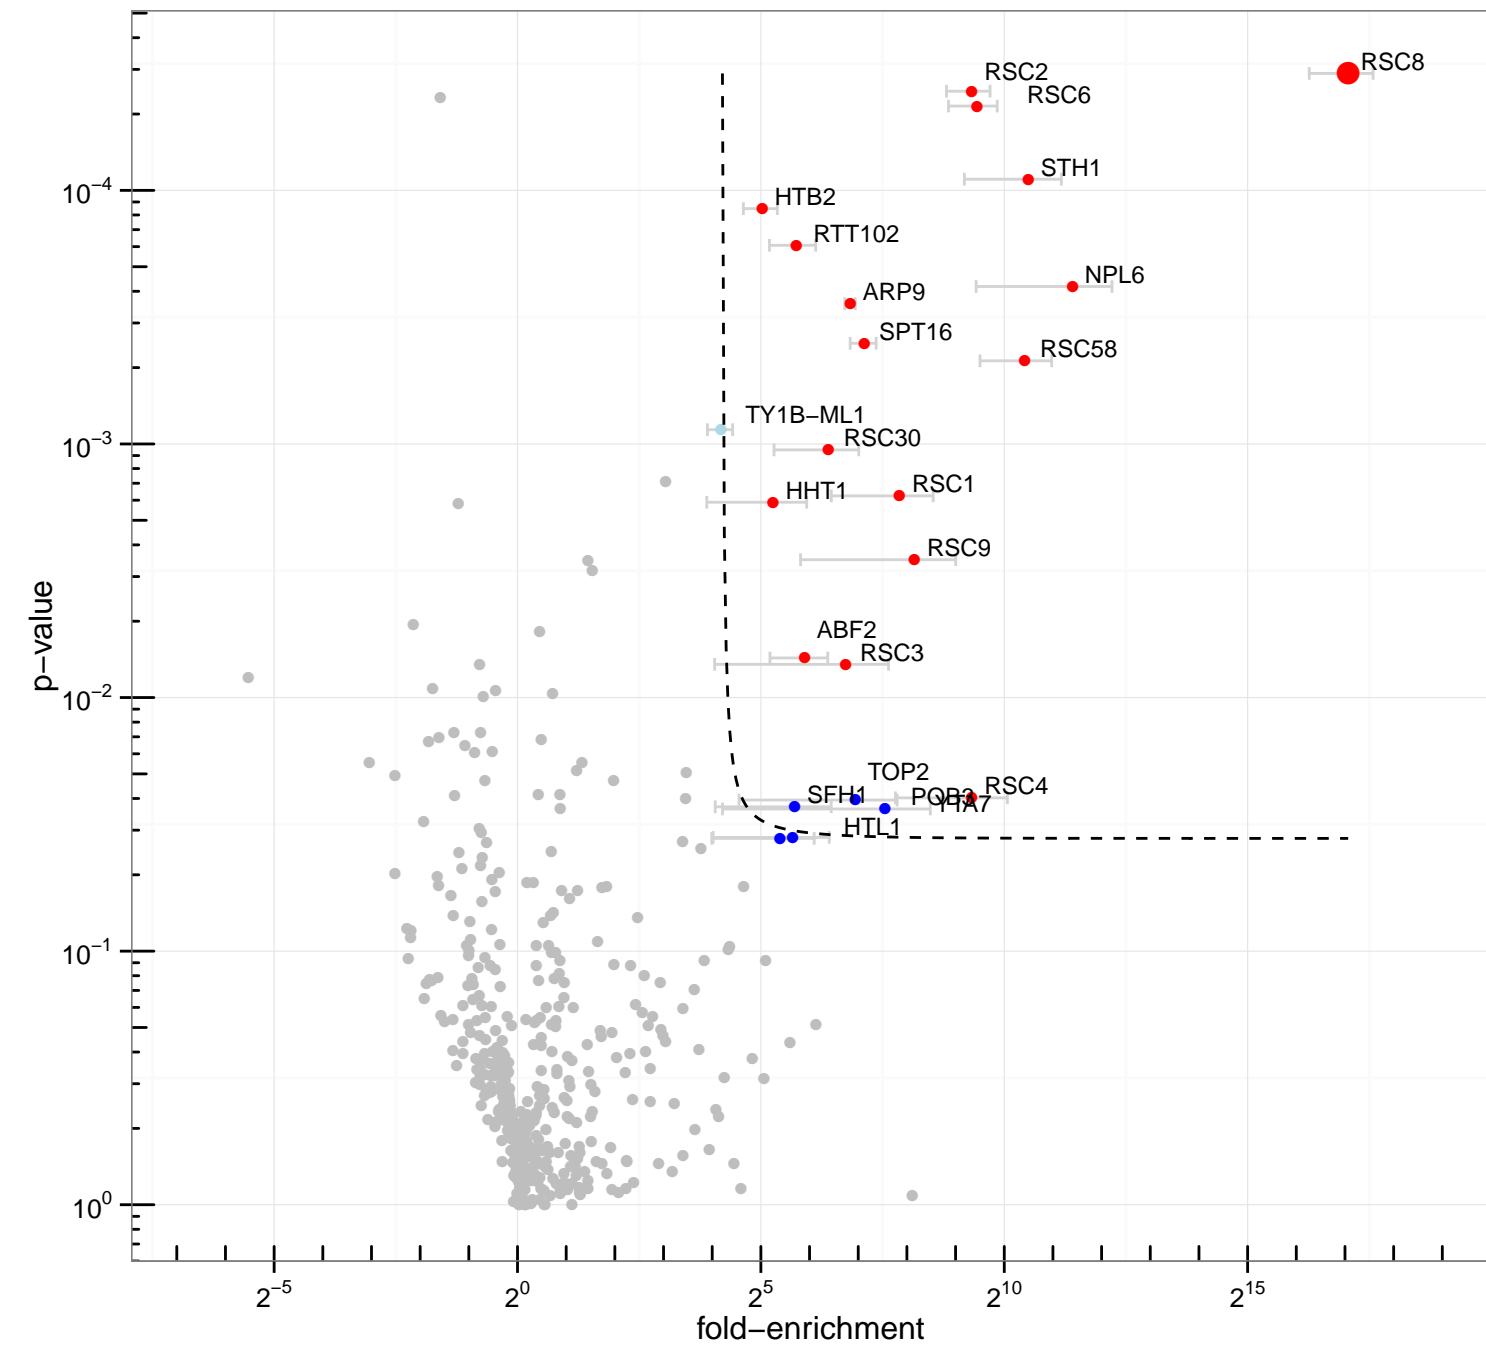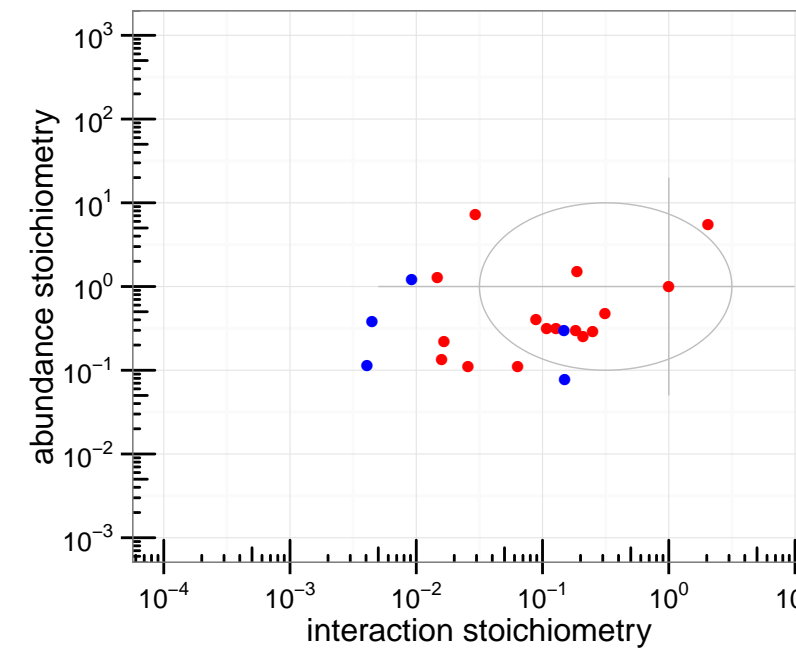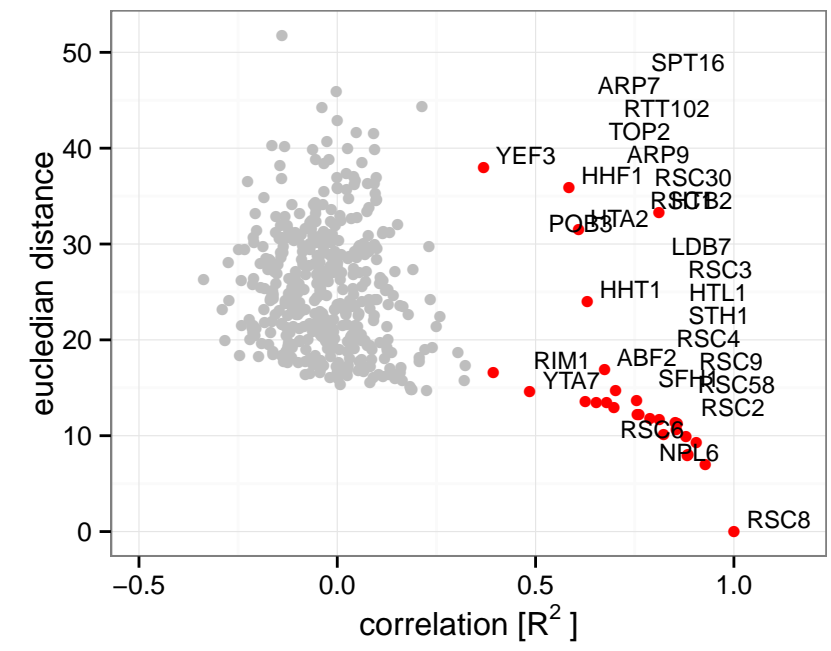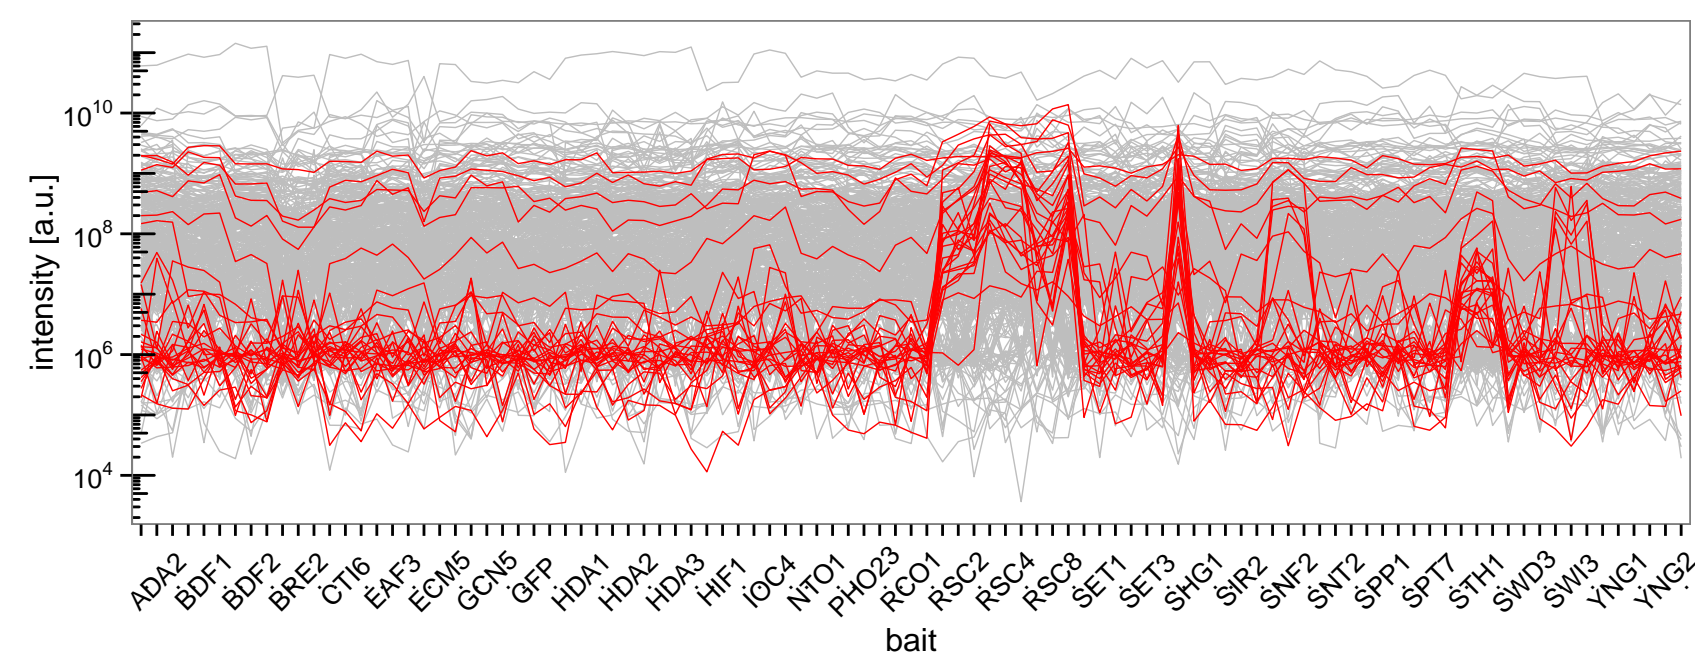

|                         | ABF2 | ARP9 | HHT1 | HTB2 | HTL1 | NPL6 | POB3 | RSC1 | RSC2 | RSC3 | RSC30 | RSC4 | RSC58 | RSC6 | RSC8 | RSC9 | RTT102 | SFH1 | SPT16 | STH1 | TOP2 | YTA7 |
|-------------------------|------|------|------|------|------|------|------|------|------|------|-------|------|-------|------|------|------|--------|------|-------|------|------|------|
| <i>significance</i>     | 5.4  | 6.8  | 5.1  | 5.6  | 4.6  | 11.0 | 6.7  | 7.4  | 9.4  | 6.1  | 6.2   | 8.5  | 10.0  | 9.5  | 17.0 | 7.6  | 6.1    | 5.0  | 7.0   | 10.0 | 6.2  | 4.9  |
| <i>interactor class</i> | A+   | A+   | A+   | A+   | B+   | A+   | B+   | A+   | A+   | A+   | A+    | A+   | A+    | A+   | A+   | A+   | A+     | B+   | A+    | A+   | B+   | B+   |

|                   |            |
|-------------------|------------|
| <b>bait</b>       | SET1       |
| <b>experiment</b> | 27 minutes |

|                    |      |
|--------------------|------|
| <b>interactors</b> | 12   |
| <b>recovery</b>    | 86 % |

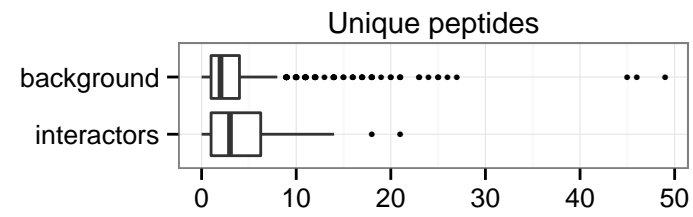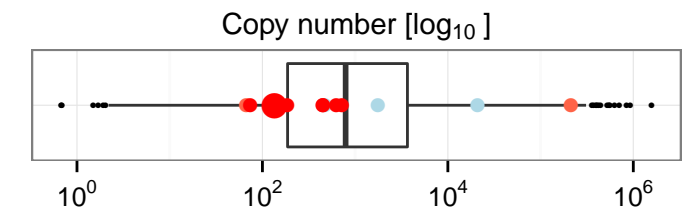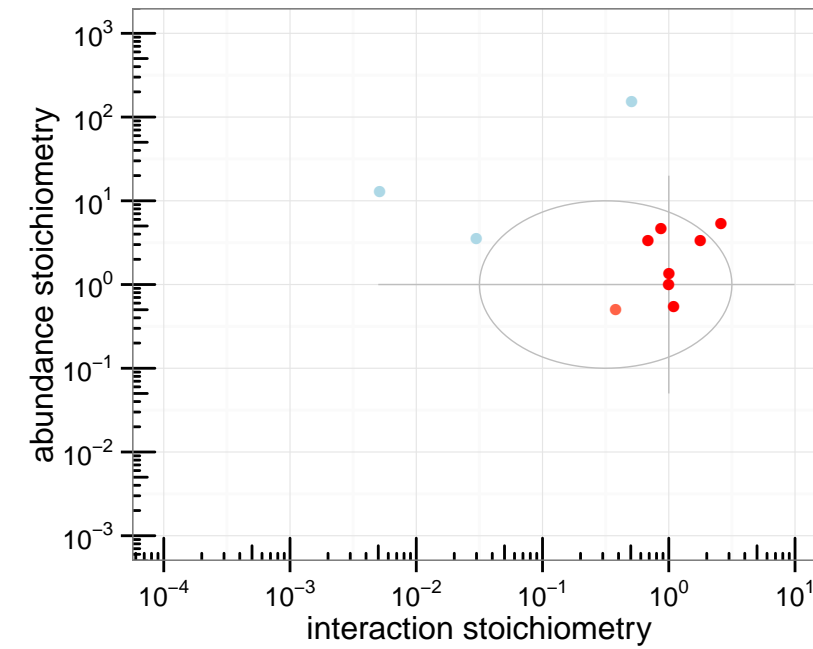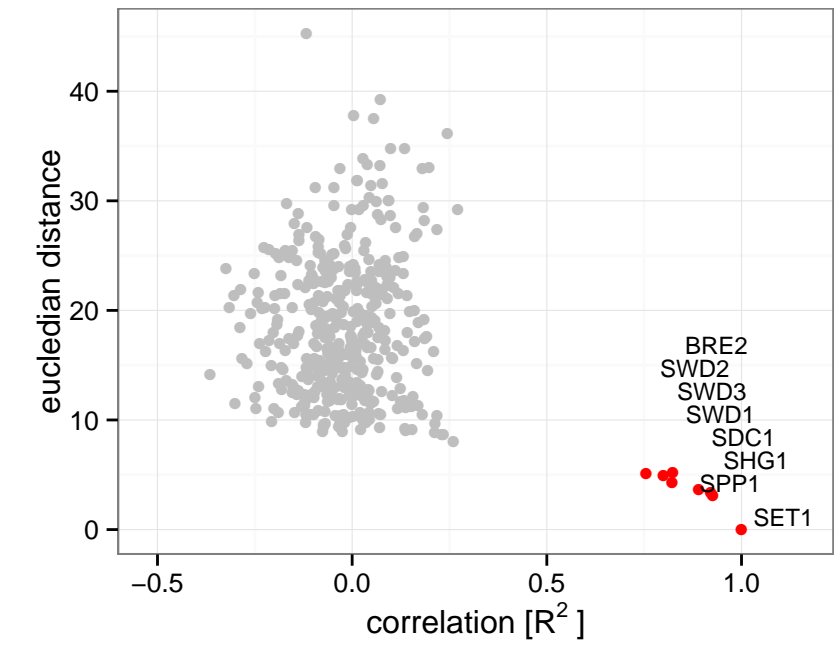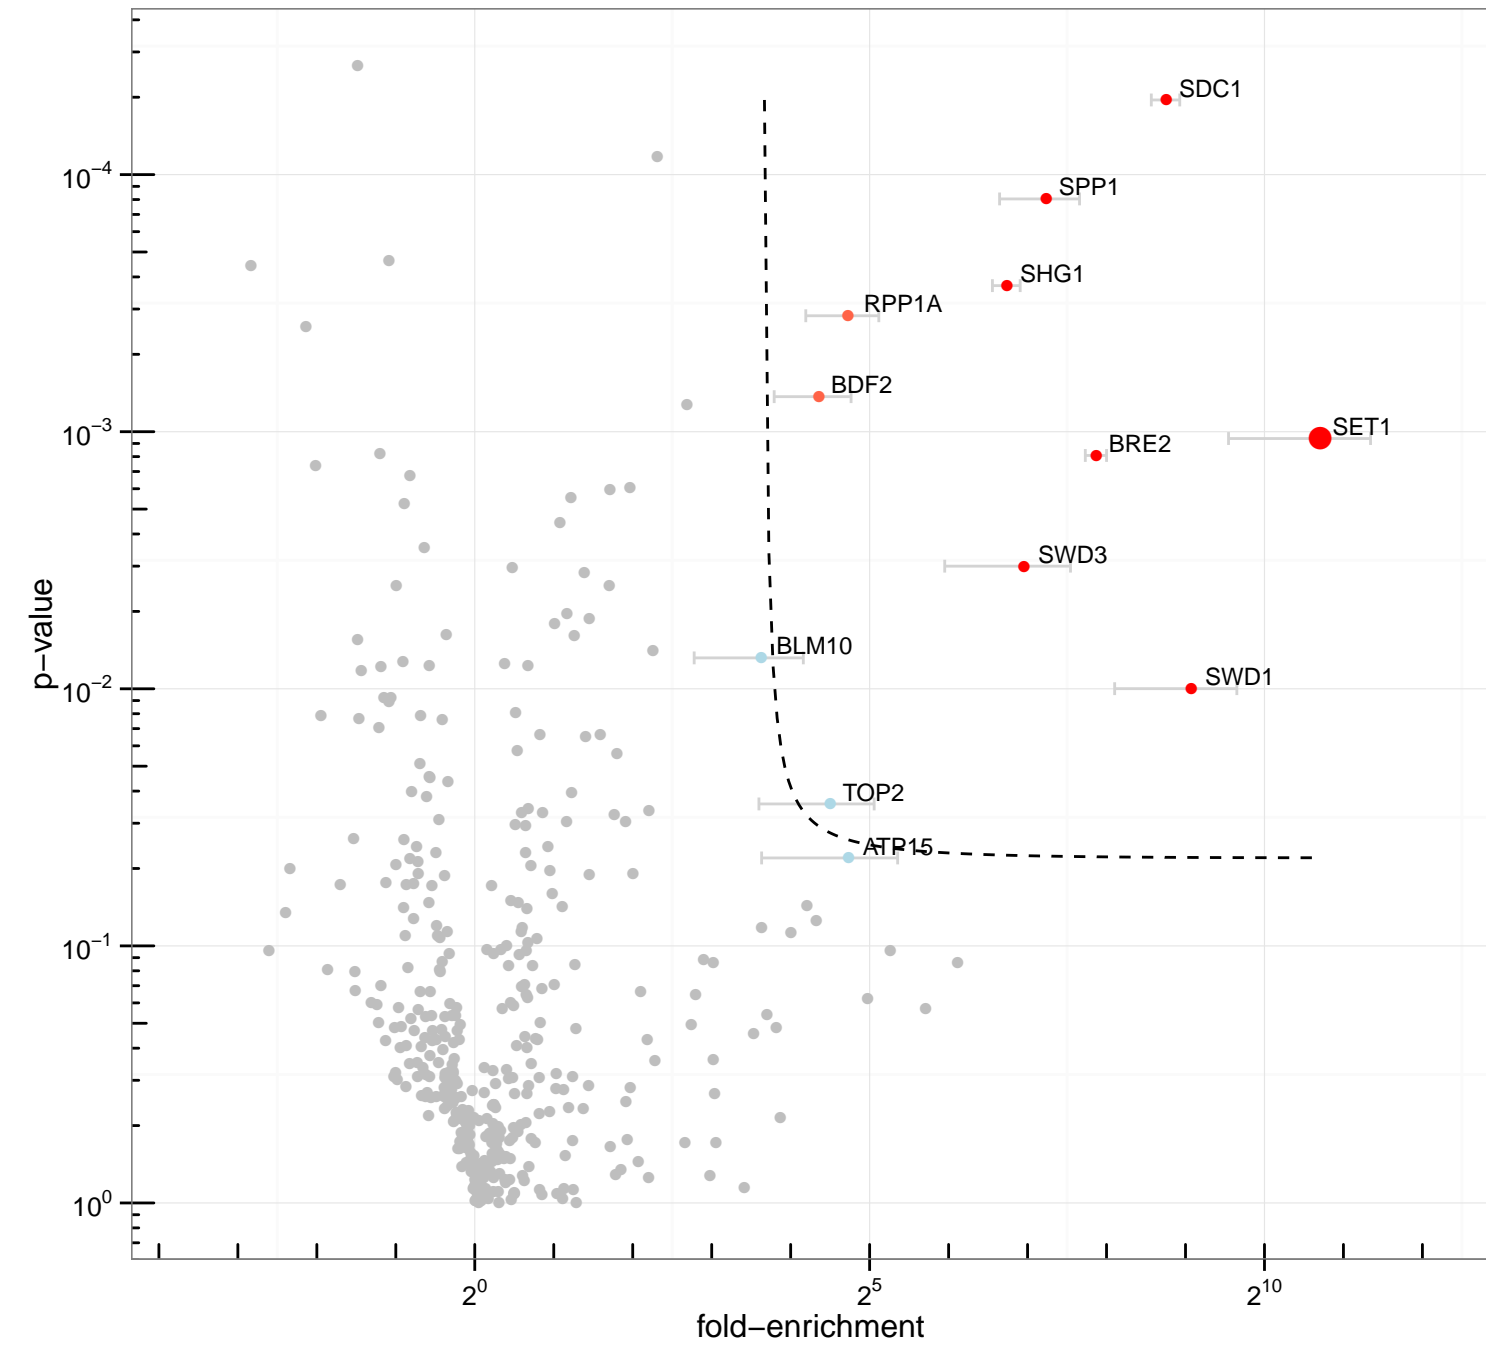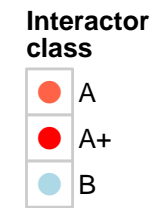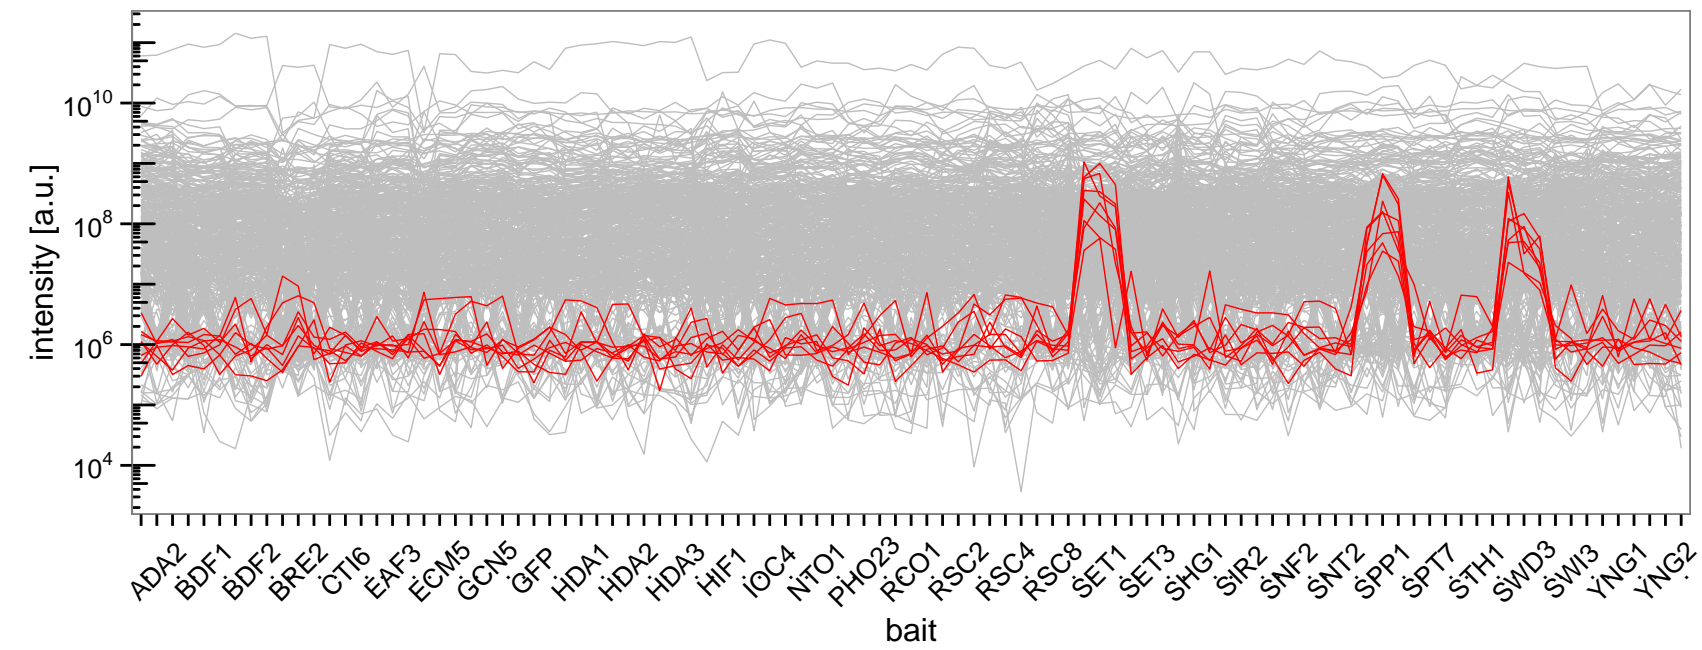

|                         | BDF2 | BRE2 | RPP1A | SDC1 | SET1 | SHG1 | SPP1 | SWD1 | SWD3 |
|-------------------------|------|------|-------|------|------|------|------|------|------|
| <i>significance</i>     | 4.6  | 7.5  | 5.1   | 8.9  | 10.0 | 6.8  | 7.4  | 8.3  | 6.5  |
| <i>interactor class</i> | A    | A+   | A     | A+   | A+   | A+   | A+   | A+   | A+   |

|                   |            |
|-------------------|------------|
| <b>bait</b>       | SET3       |
| <b>experiment</b> | 27 minutes |

|                    |      |
|--------------------|------|
| <b>interactors</b> | 4    |
| <b>recovery</b>    | 18 % |

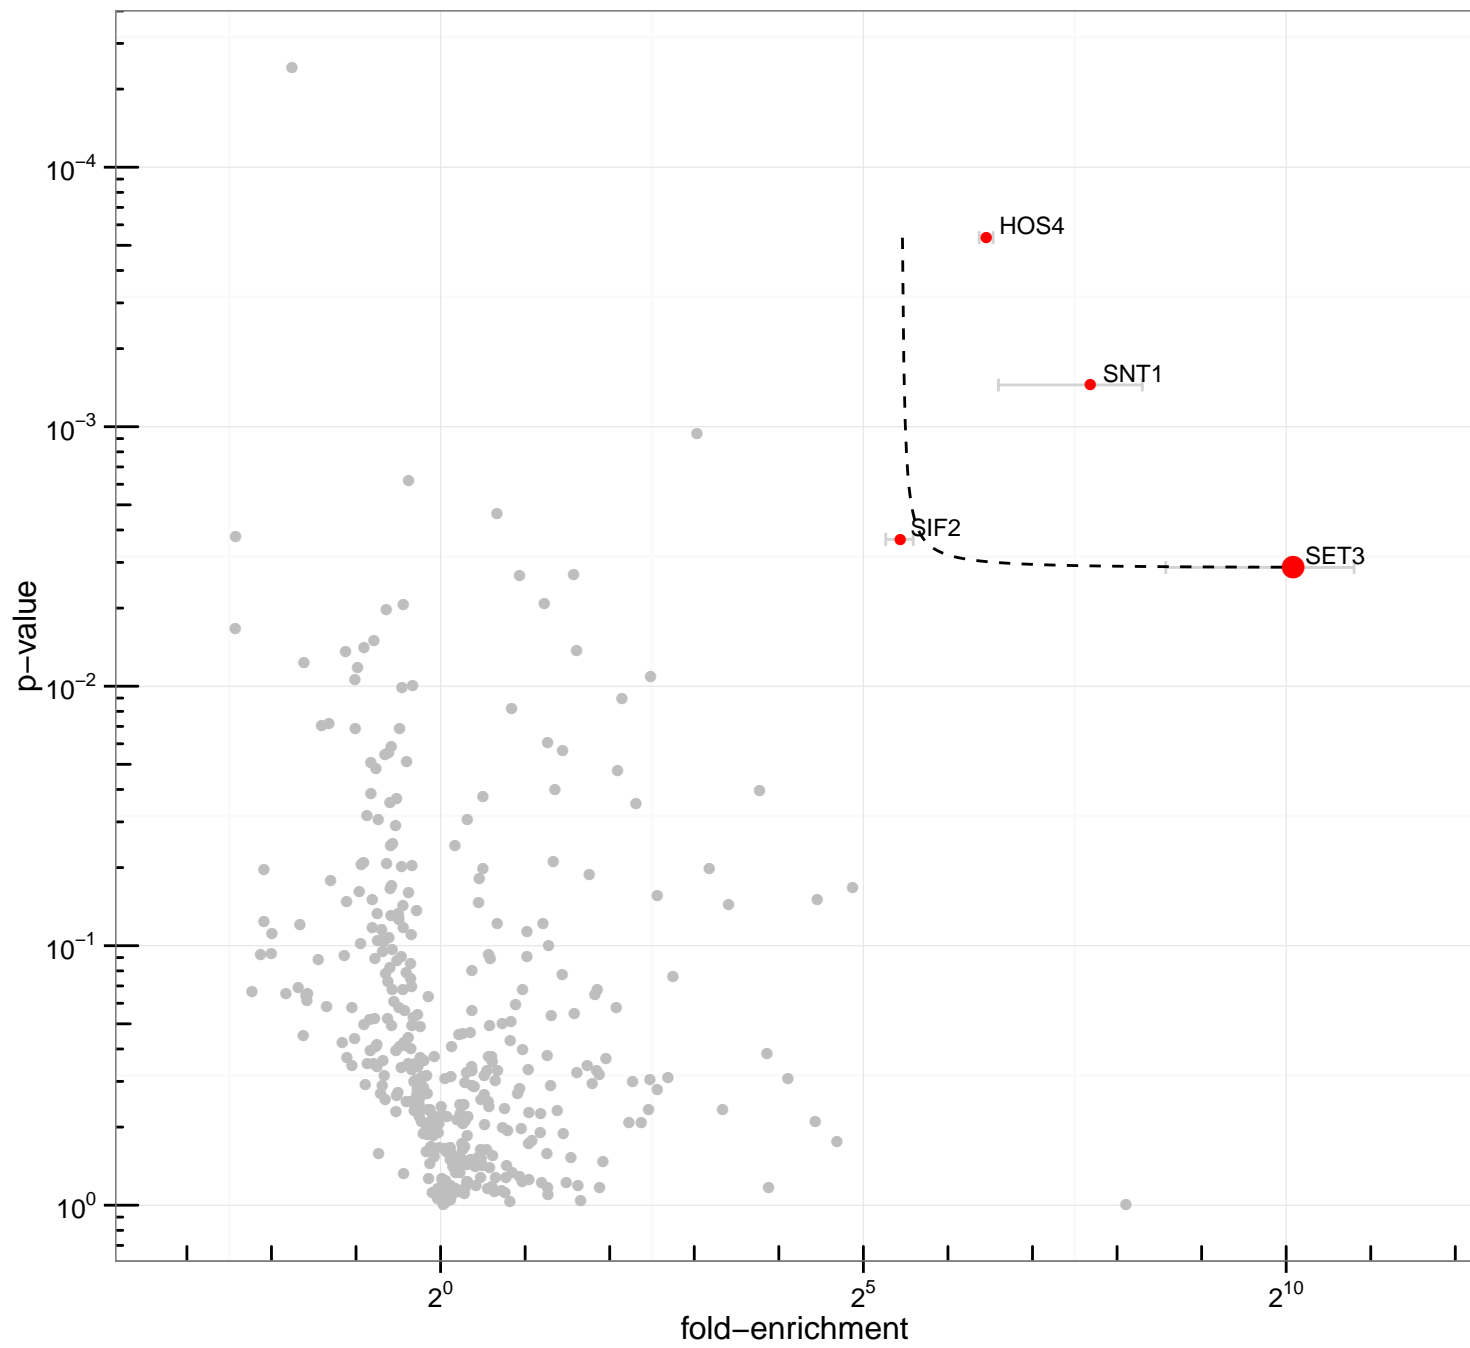

**Interactor class**  
● A+

|                         | HOS4 | SET3 | SIF2 | SNT1 |
|-------------------------|------|------|------|------|
| <i>significance</i>     | 6.6  | 9.4  | 5.1  | 7.4  |
| <i>interactor class</i> | A+   | A+   | A+   | A+   |

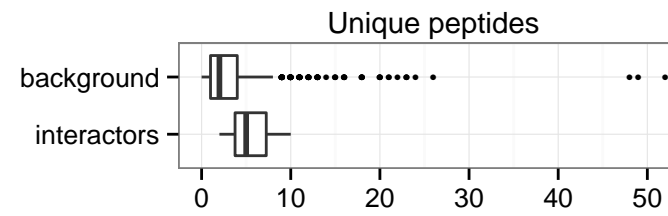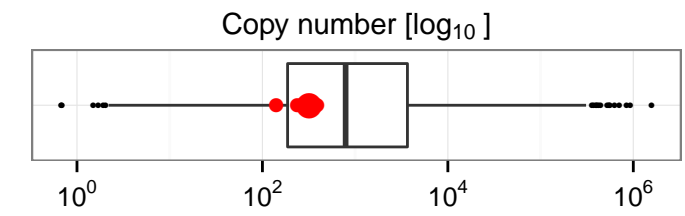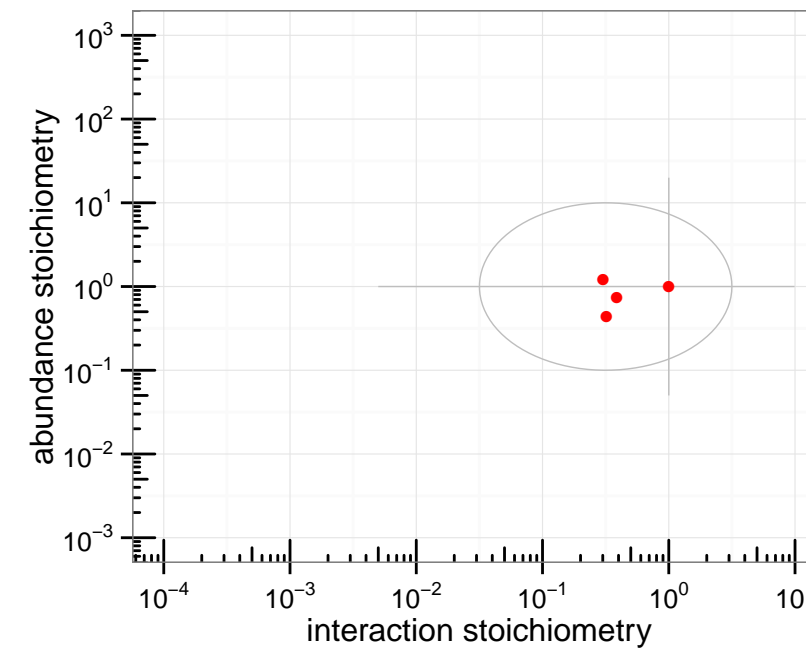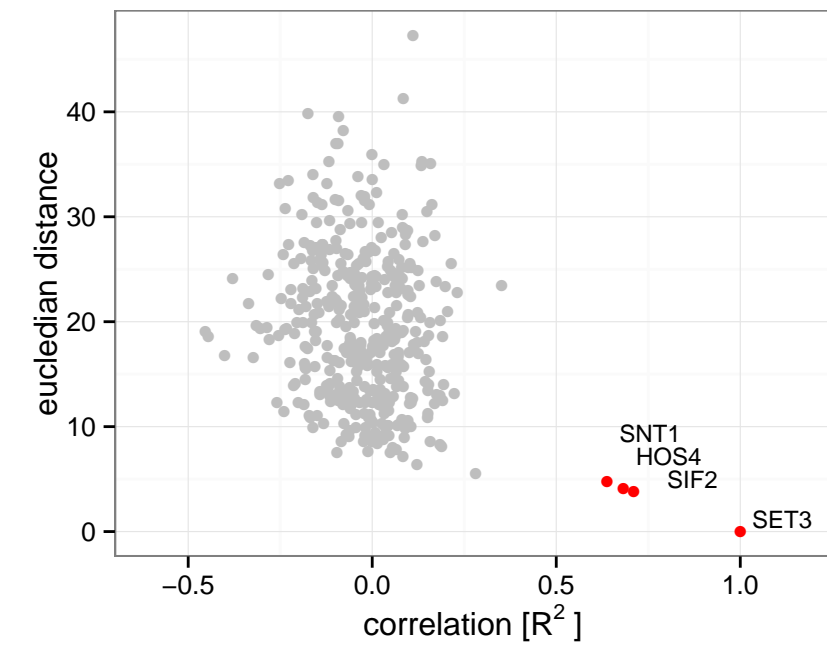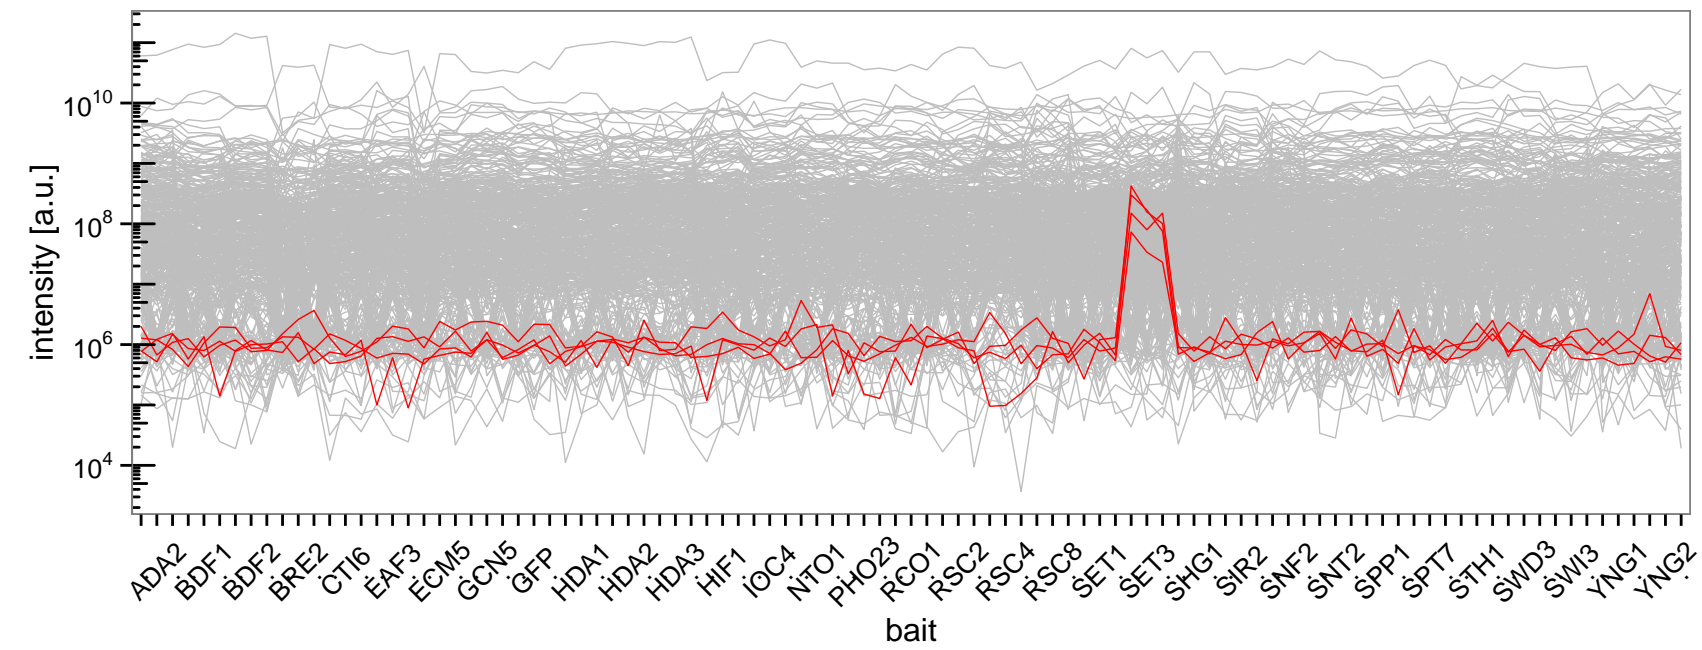

|                   |            |
|-------------------|------------|
| <b>bait</b>       | SHG1       |
| <b>experiment</b> | 27 minutes |

|                    |     |
|--------------------|-----|
| <b>interactors</b> | 1   |
| <b>recovery</b>    | 0 % |

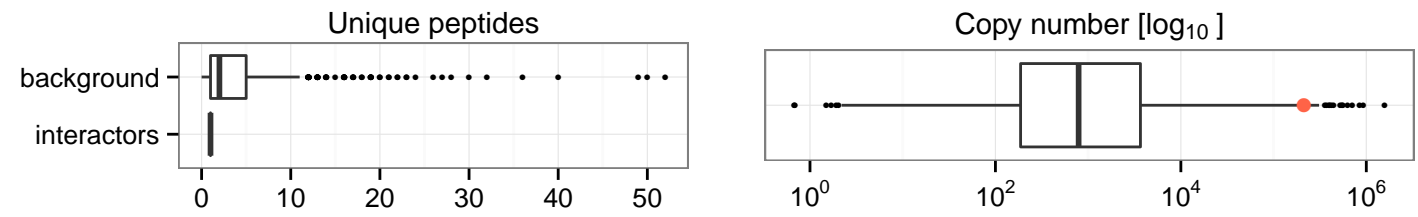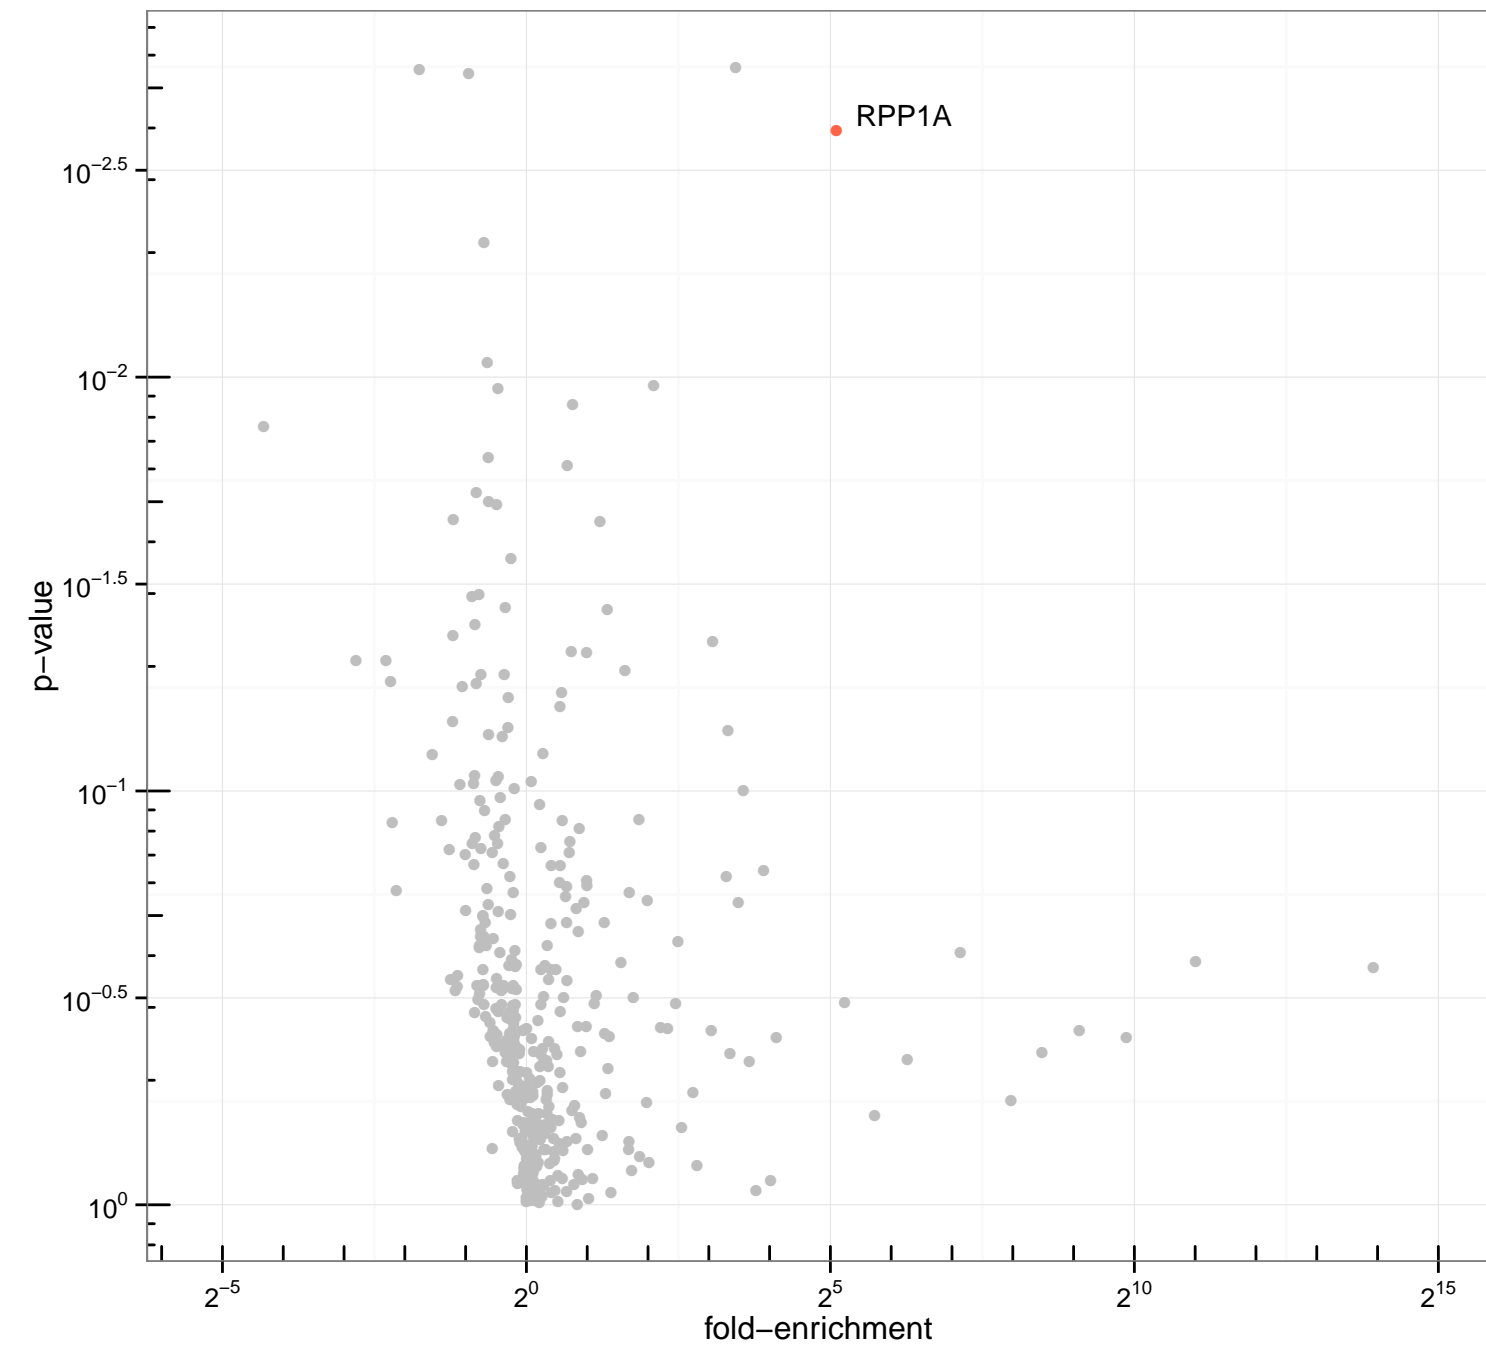

**Interactor class**  
● A

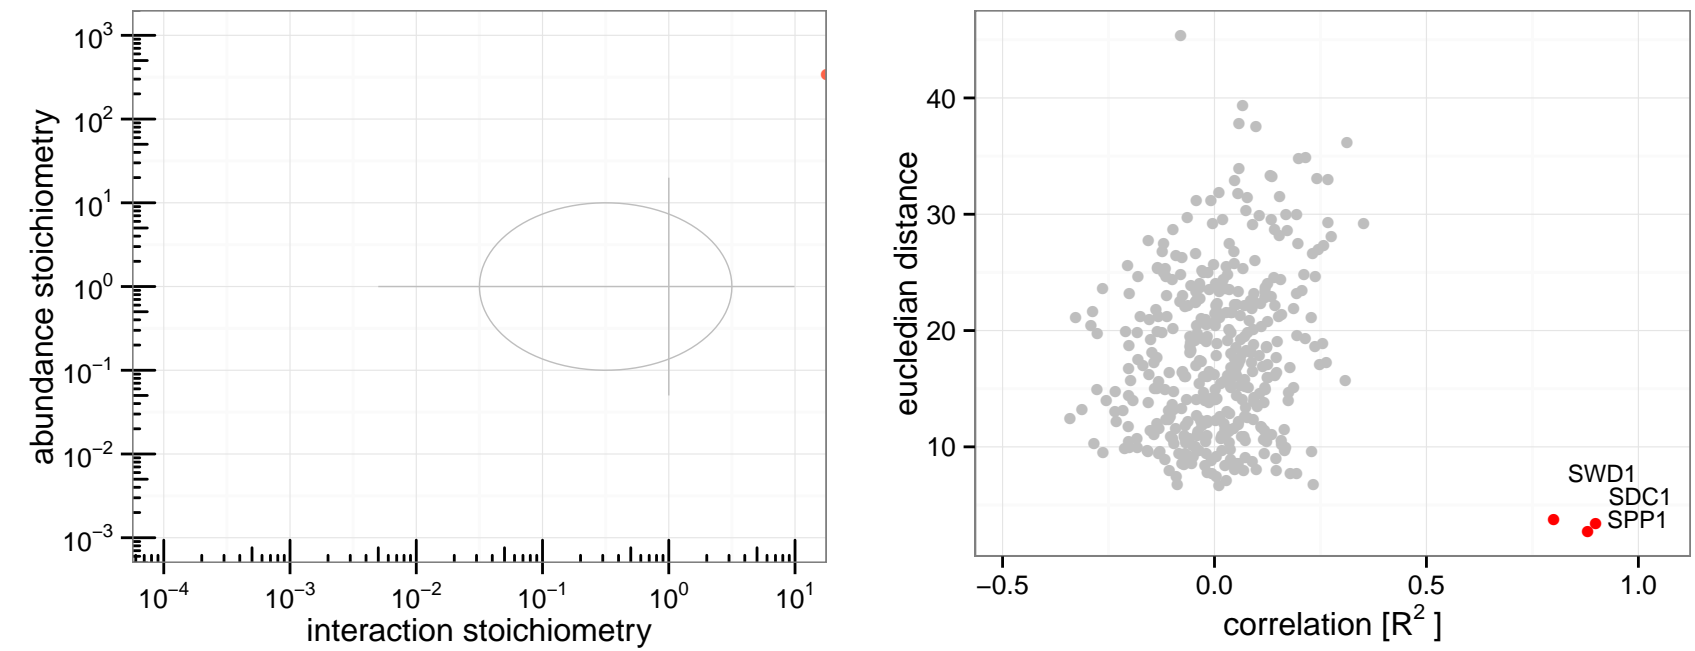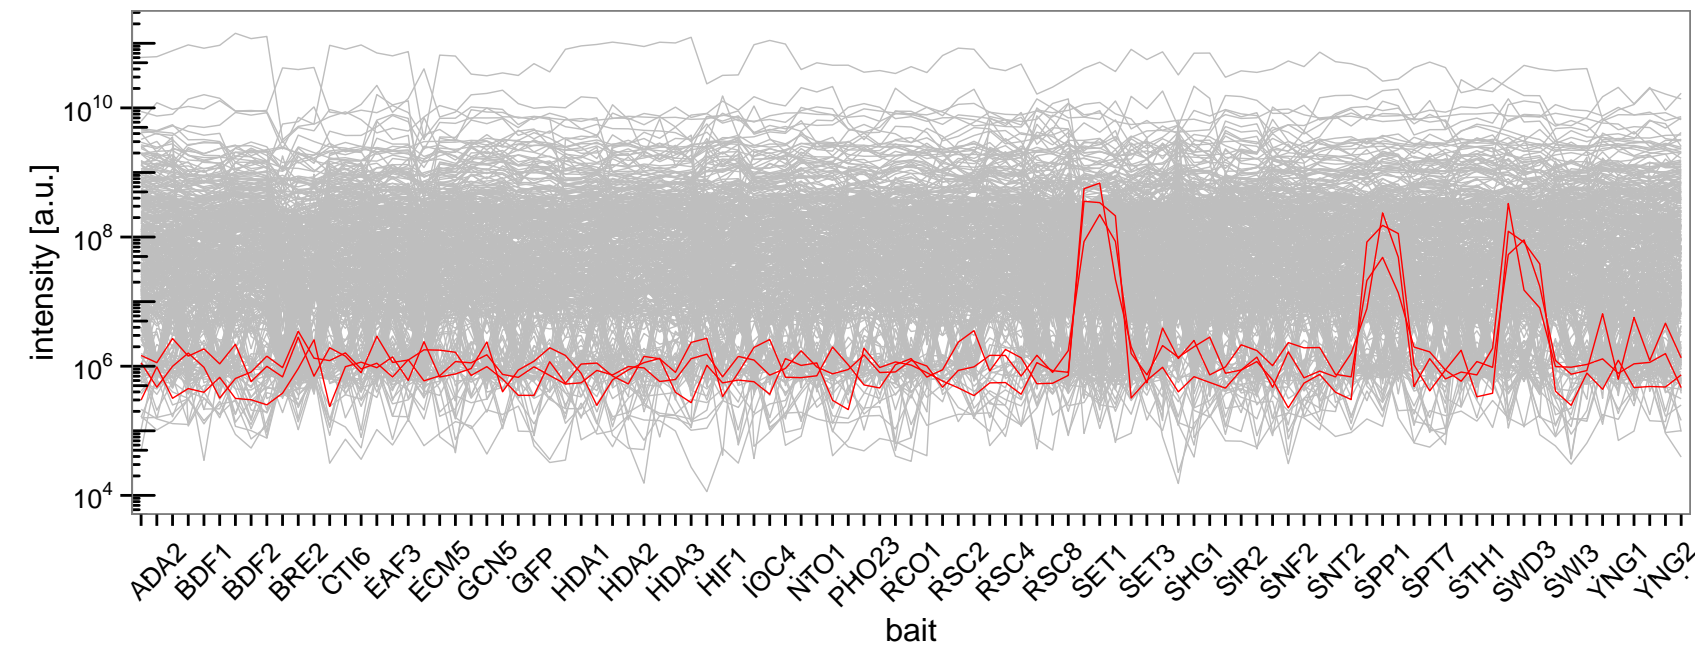

|                         |              |
|-------------------------|--------------|
|                         | <b>RPP1A</b> |
| <i>significance</i>     | 4.9          |
| <i>interactor class</i> | A            |



|                   |            |
|-------------------|------------|
| <b>bait</b>       | SIR2       |
| <b>experiment</b> | 27 minutes |

|                    |      |
|--------------------|------|
| <b>interactors</b> | 2    |
| <b>recovery</b>    | 20 % |

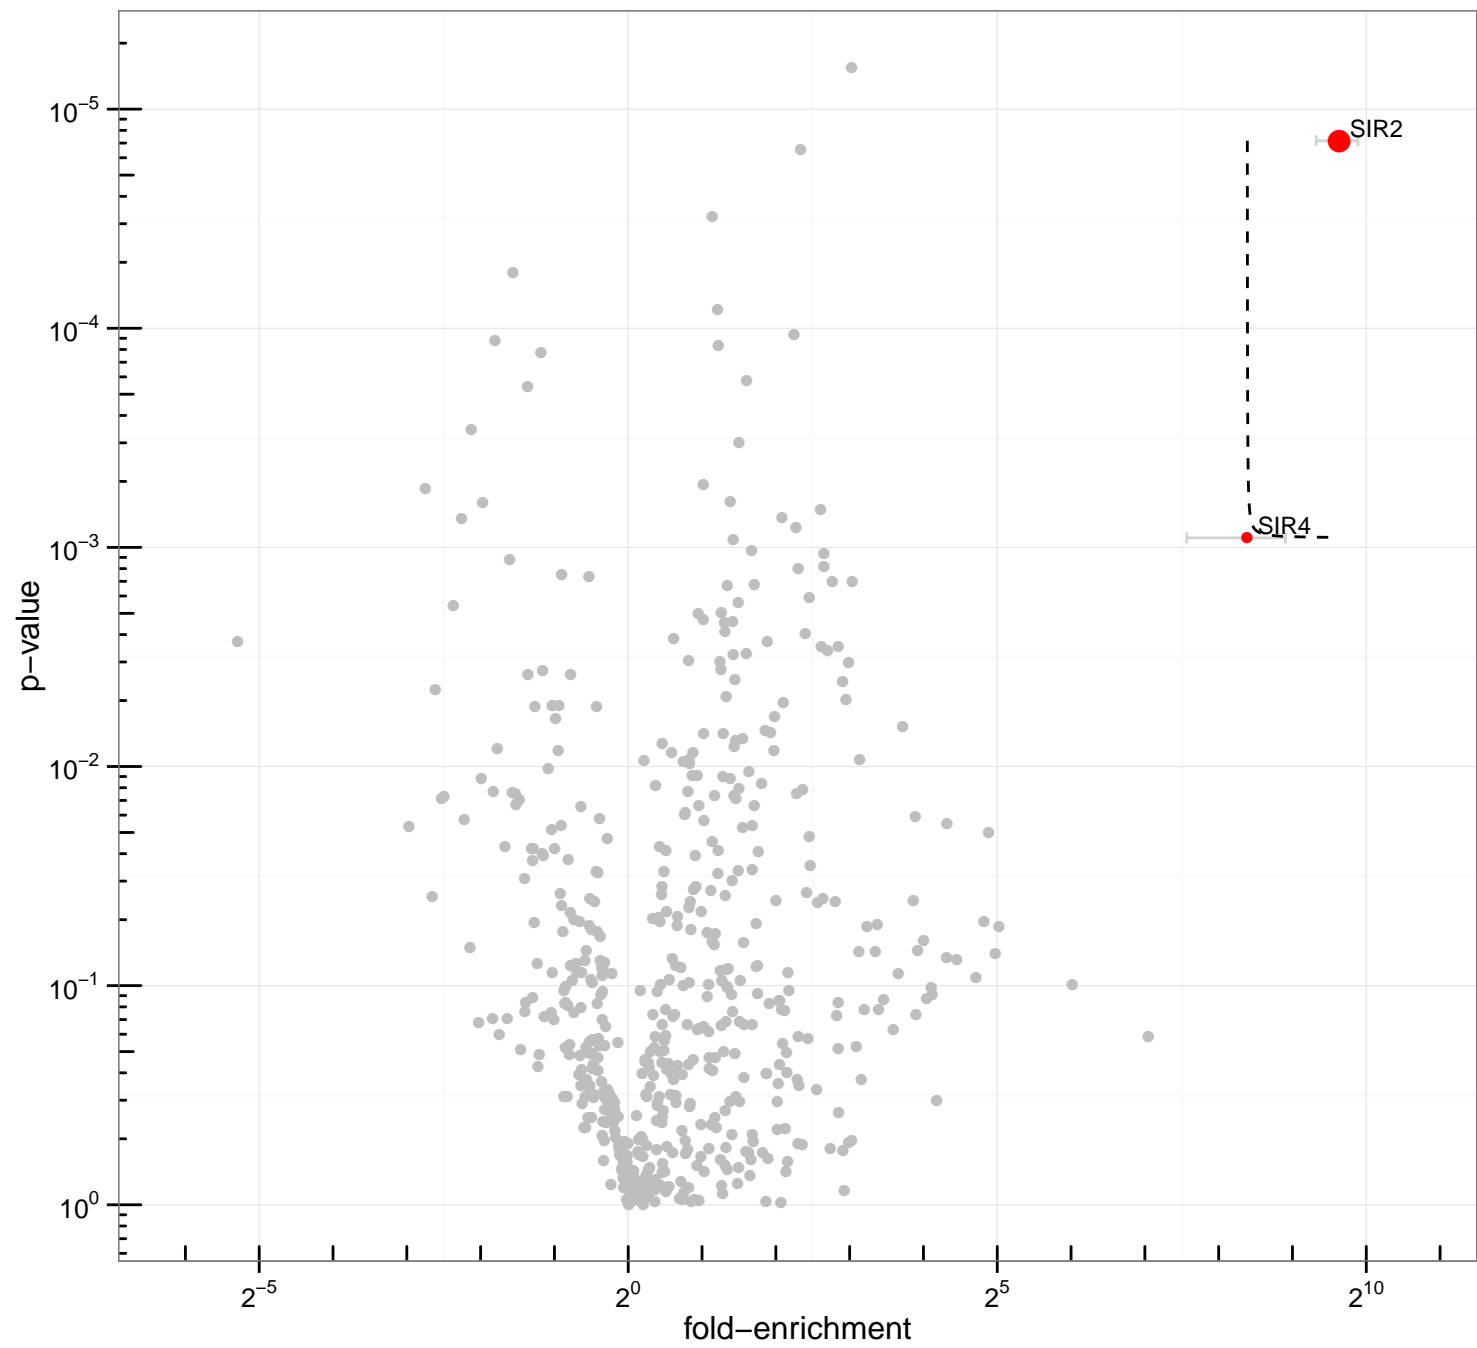

**Interactor class**  
● A+

|                         | SIR2 | SIR4 |
|-------------------------|------|------|
| <i>significance</i>     | 9.9  | 8.0  |
| <i>interactor class</i> | A+   | A+   |

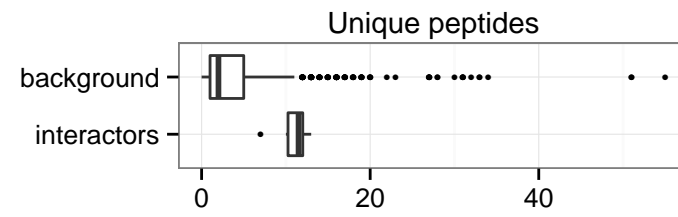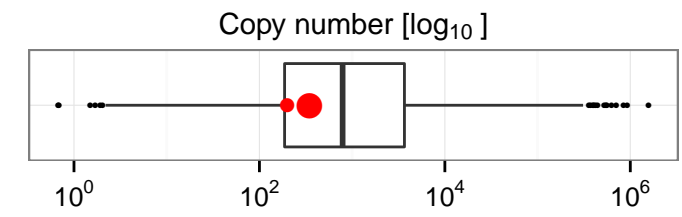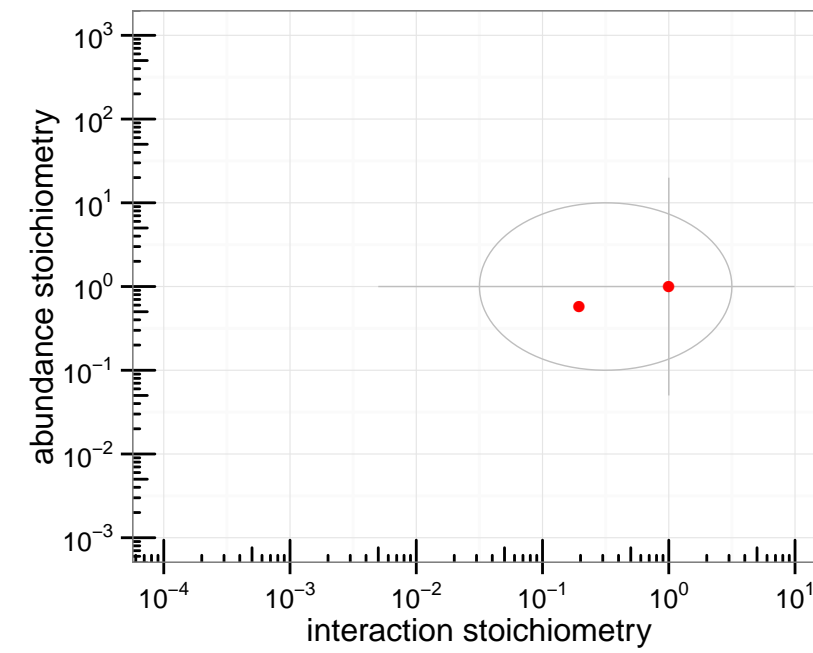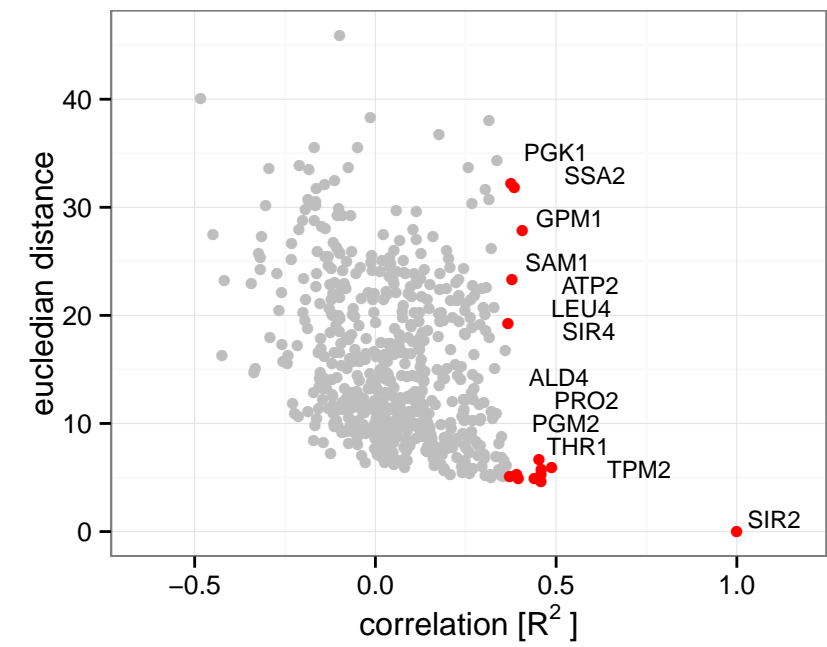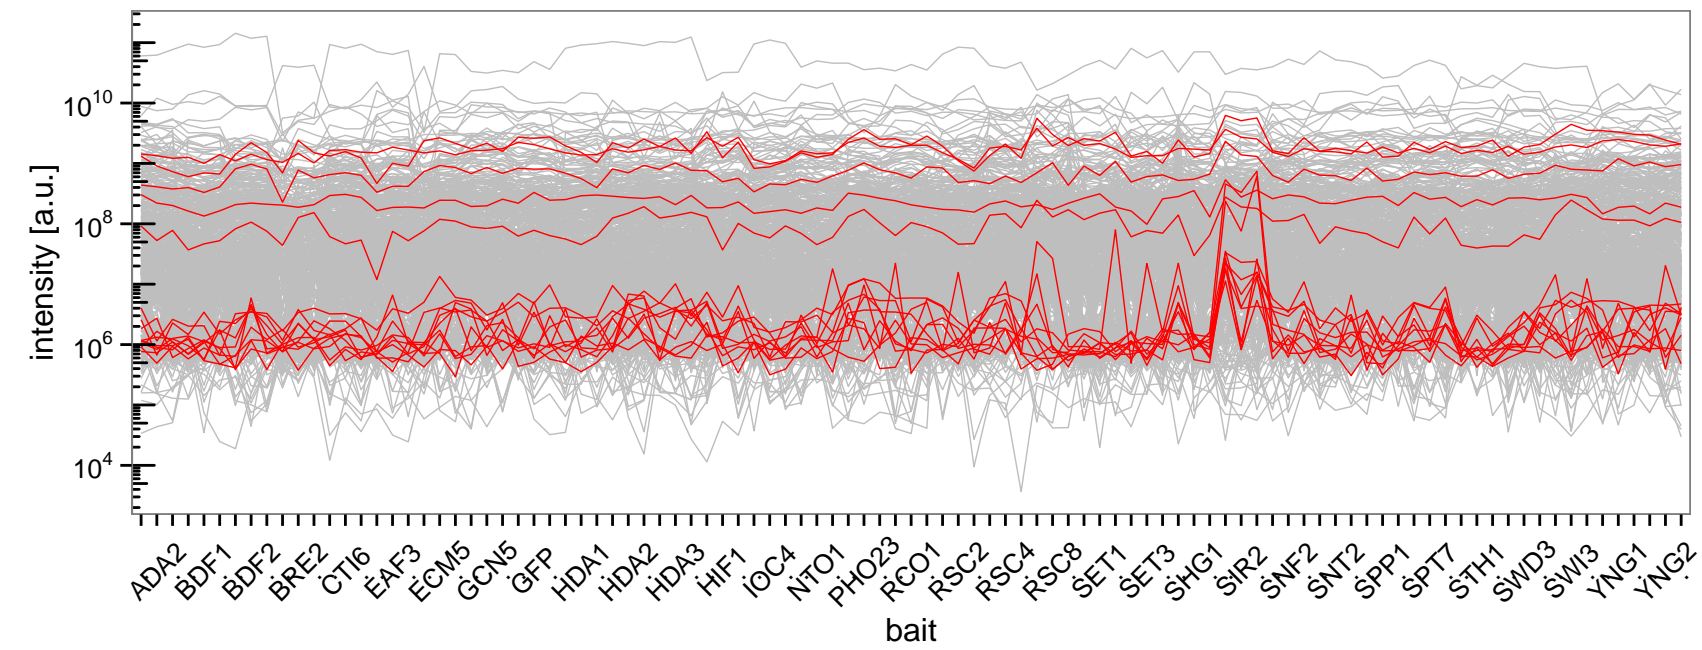



|                   |            |
|-------------------|------------|
| <b>bait</b>       | SNT2       |
| <b>experiment</b> | 27 minutes |

|                    |     |
|--------------------|-----|
| <b>interactors</b> | 0   |
| <b>recovery</b>    | 0 % |

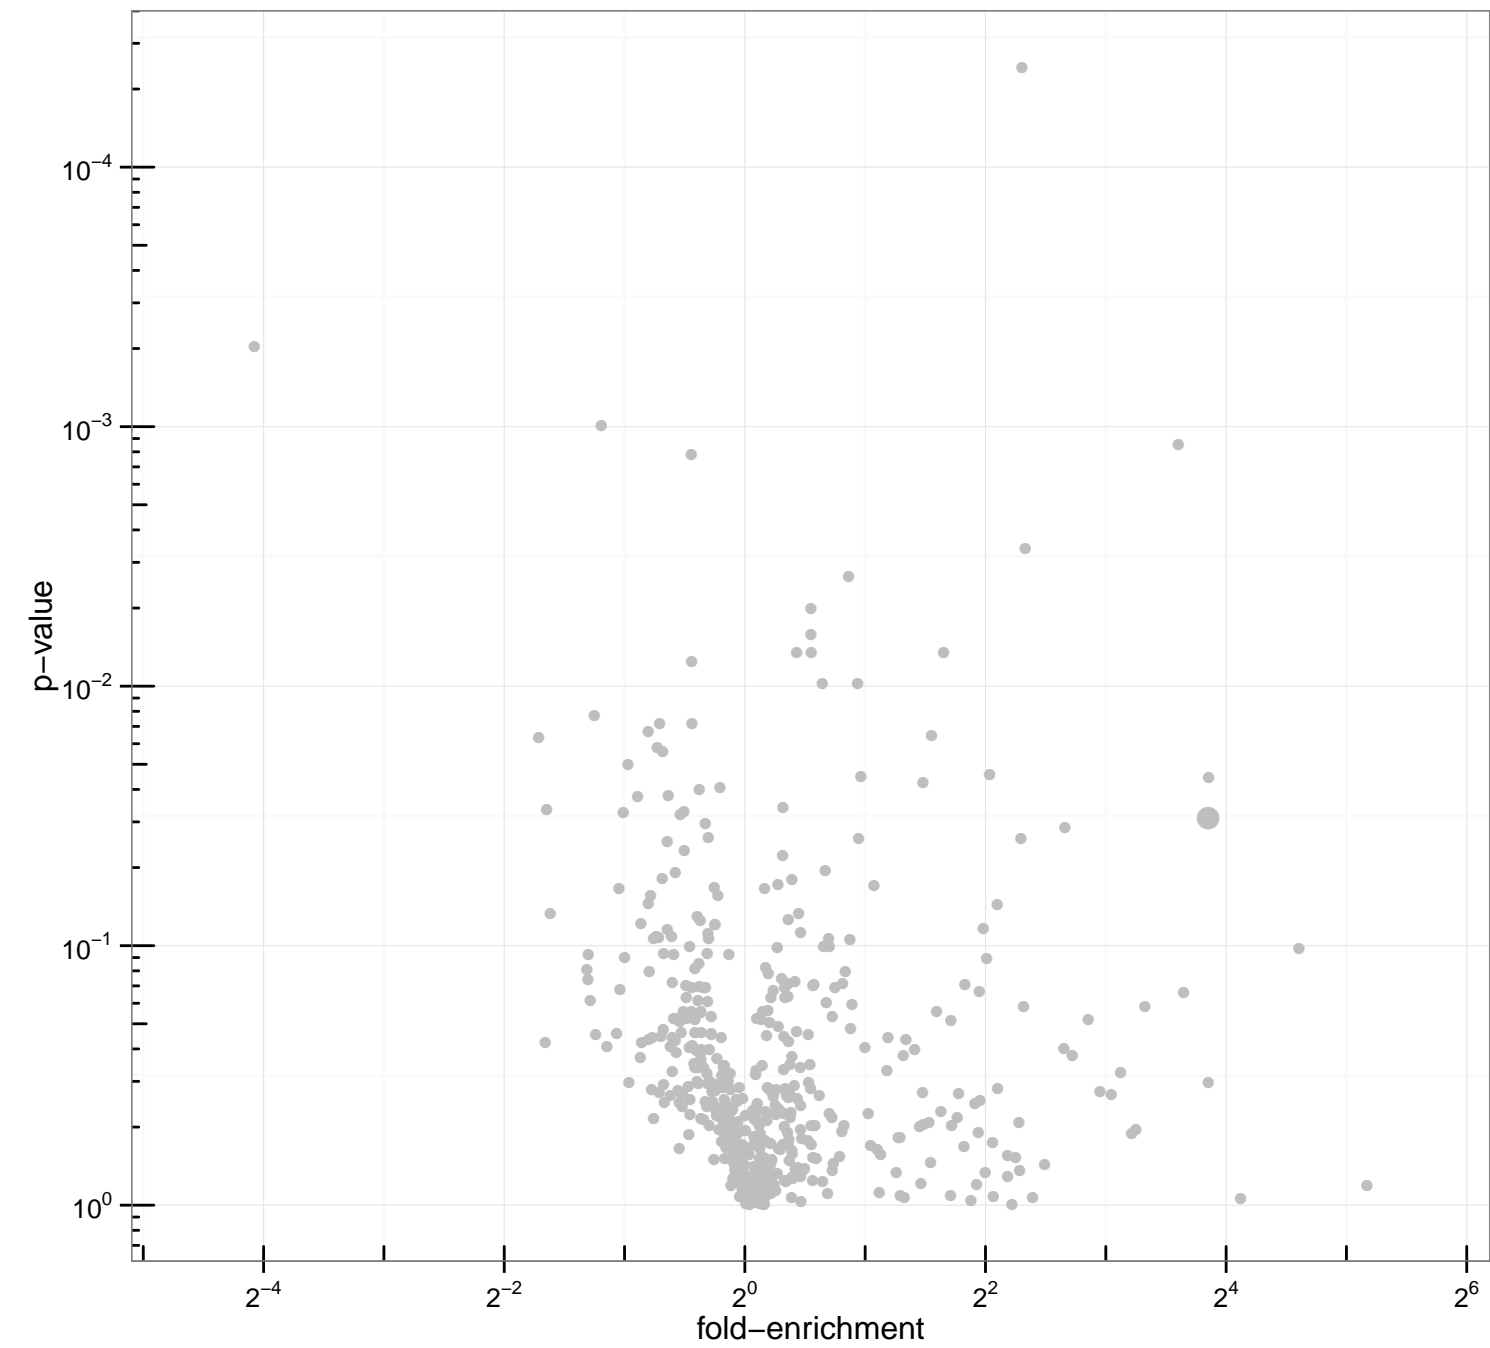

**Interactor class**  
 -

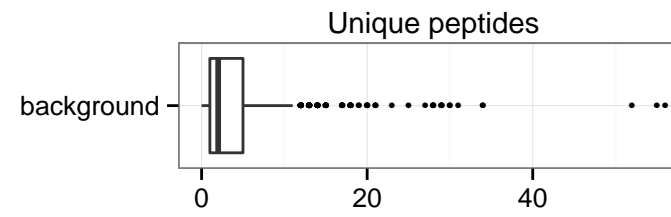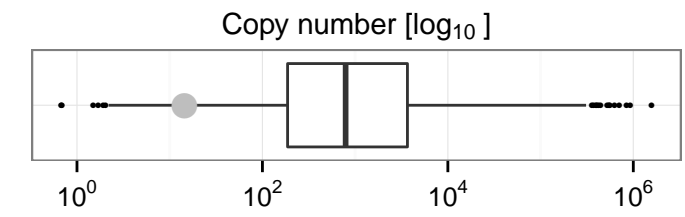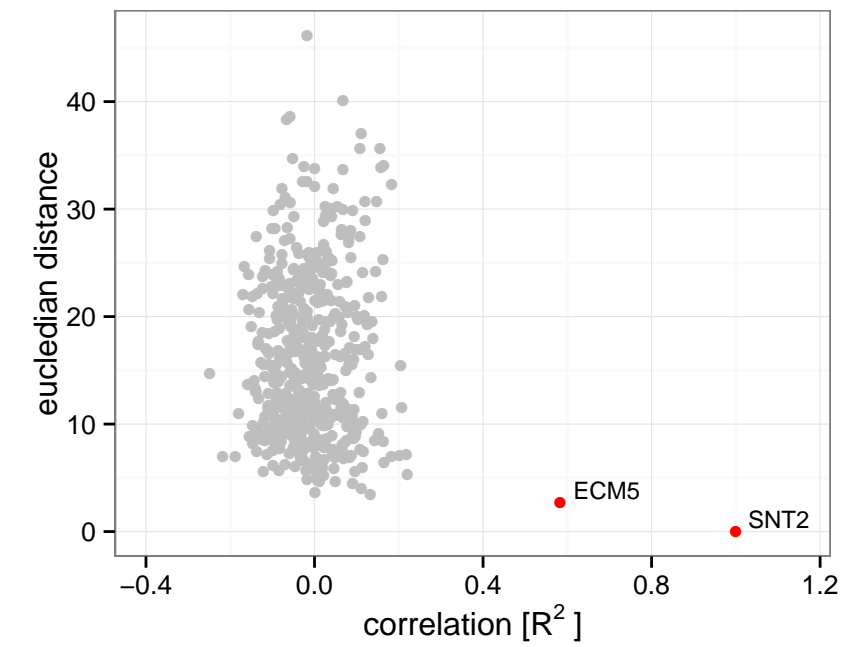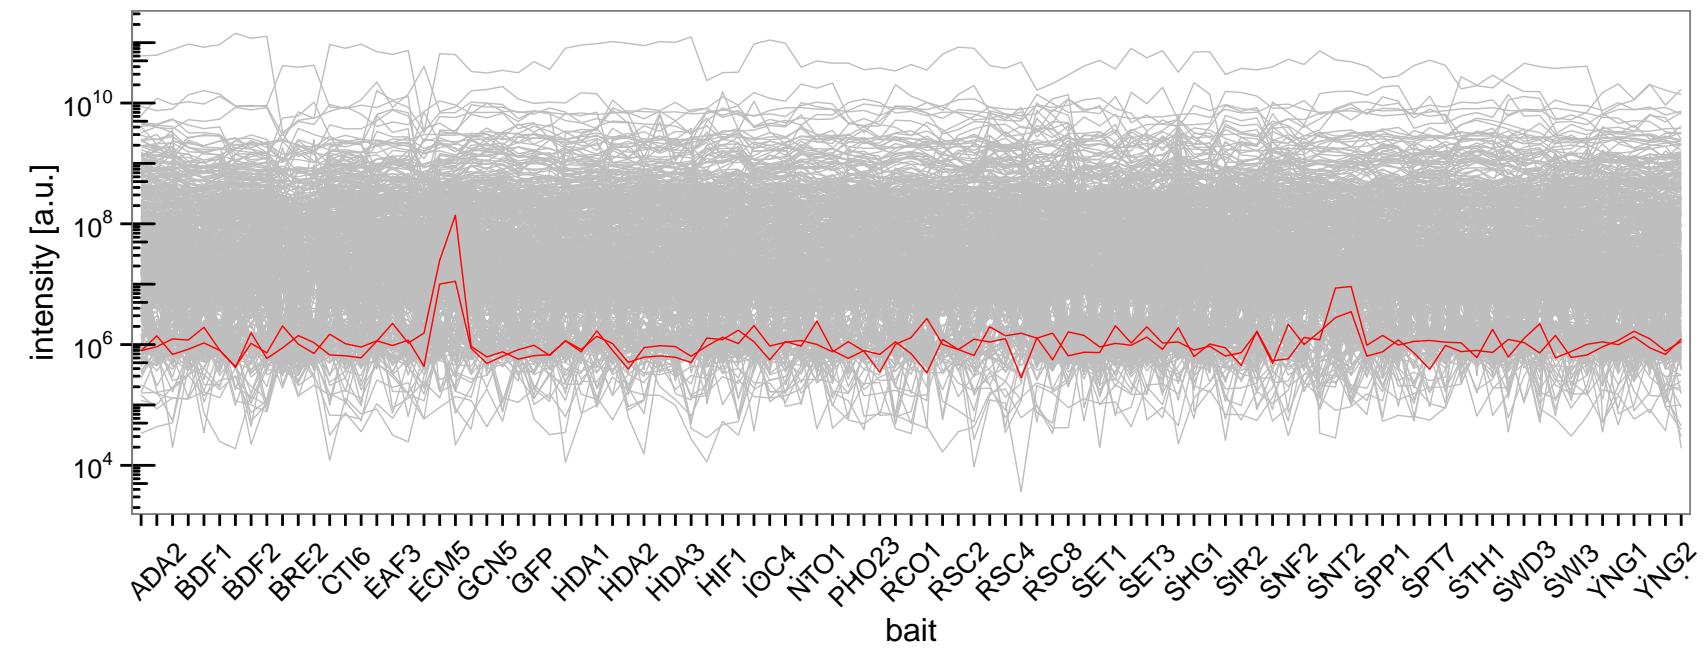

*significance*  
*interactor class*









|                   |            |
|-------------------|------------|
| <b>bait</b>       | SWD3       |
| <b>experiment</b> | 27 minutes |

|                    |       |
|--------------------|-------|
| <b>interactors</b> | 8     |
| <b>recovery</b>    | 100 % |

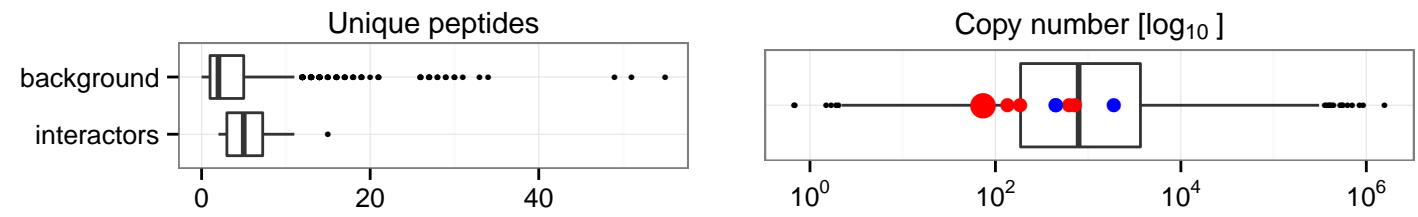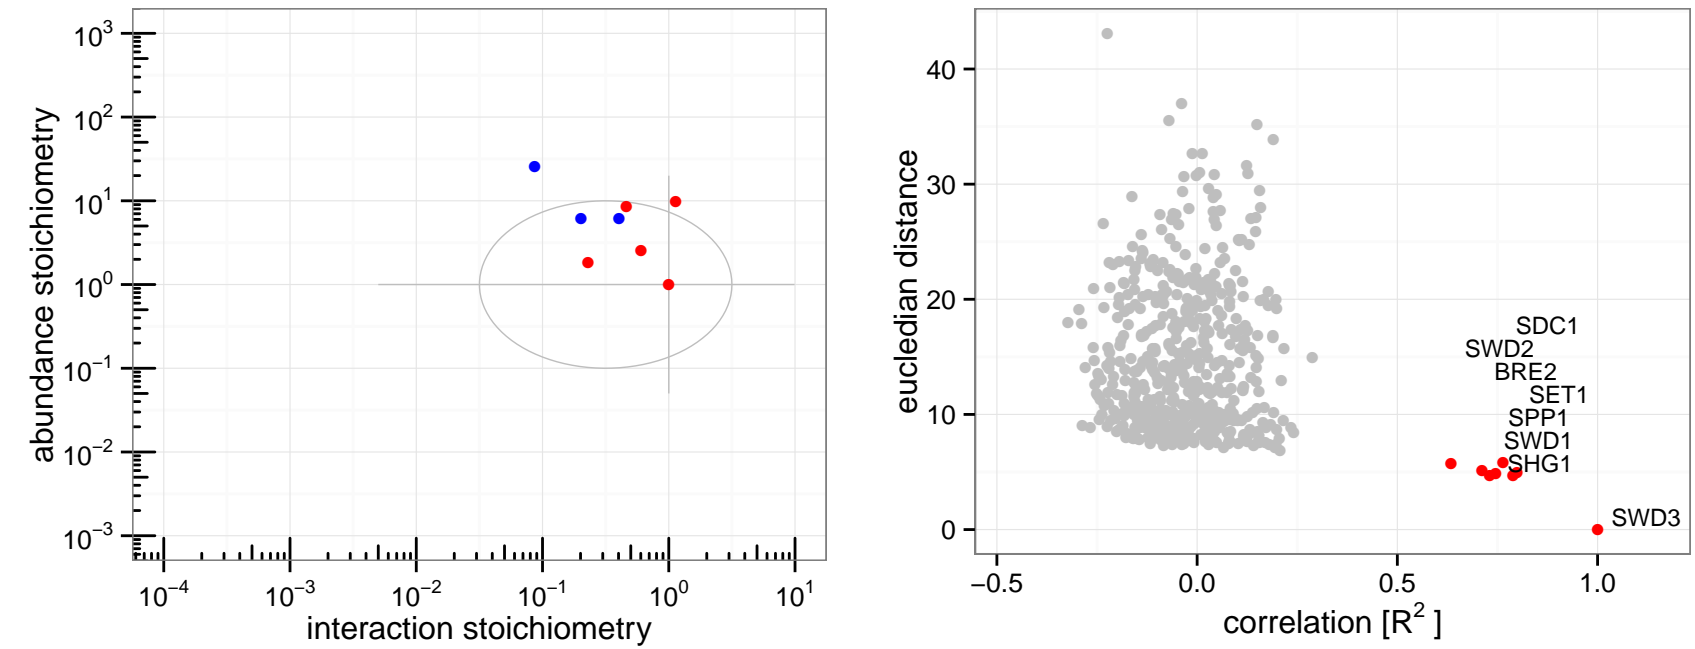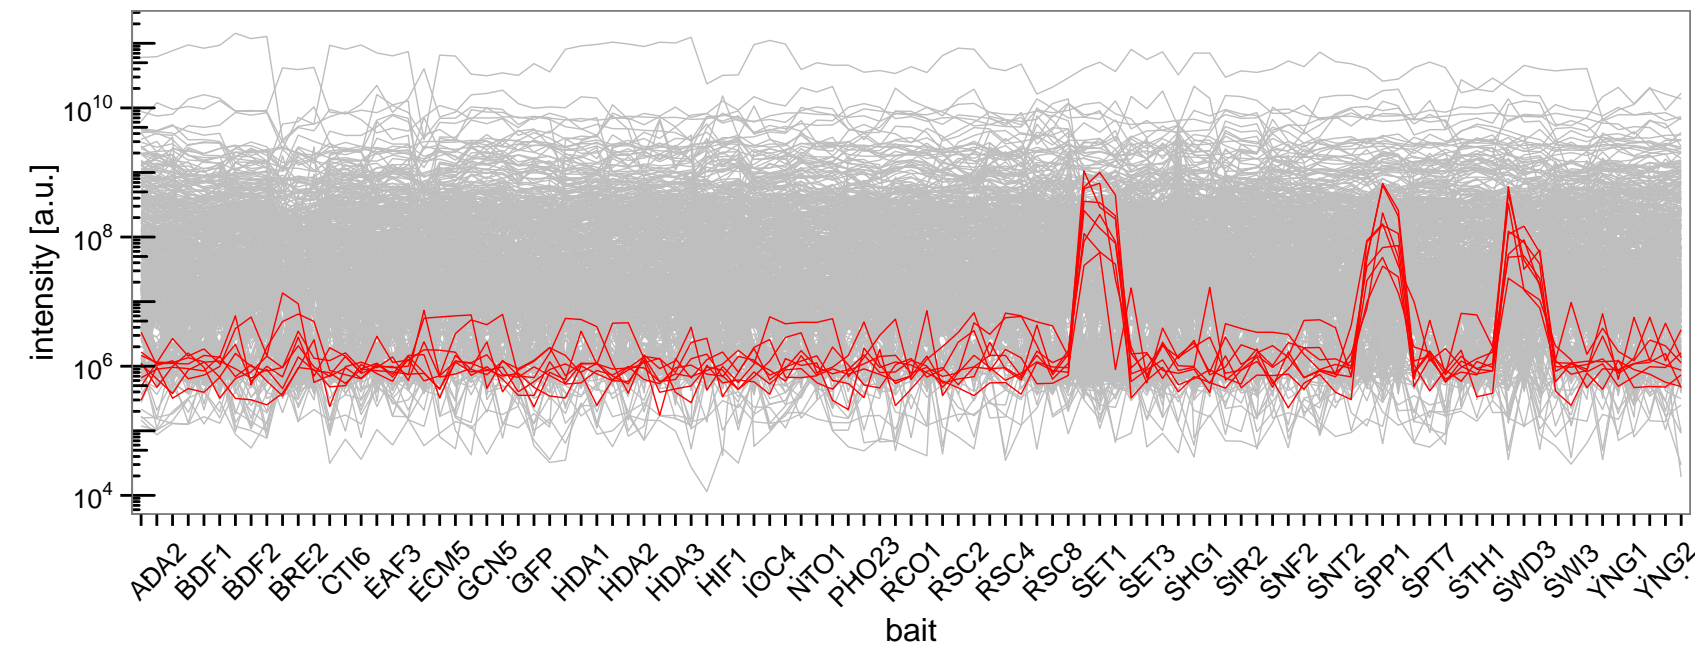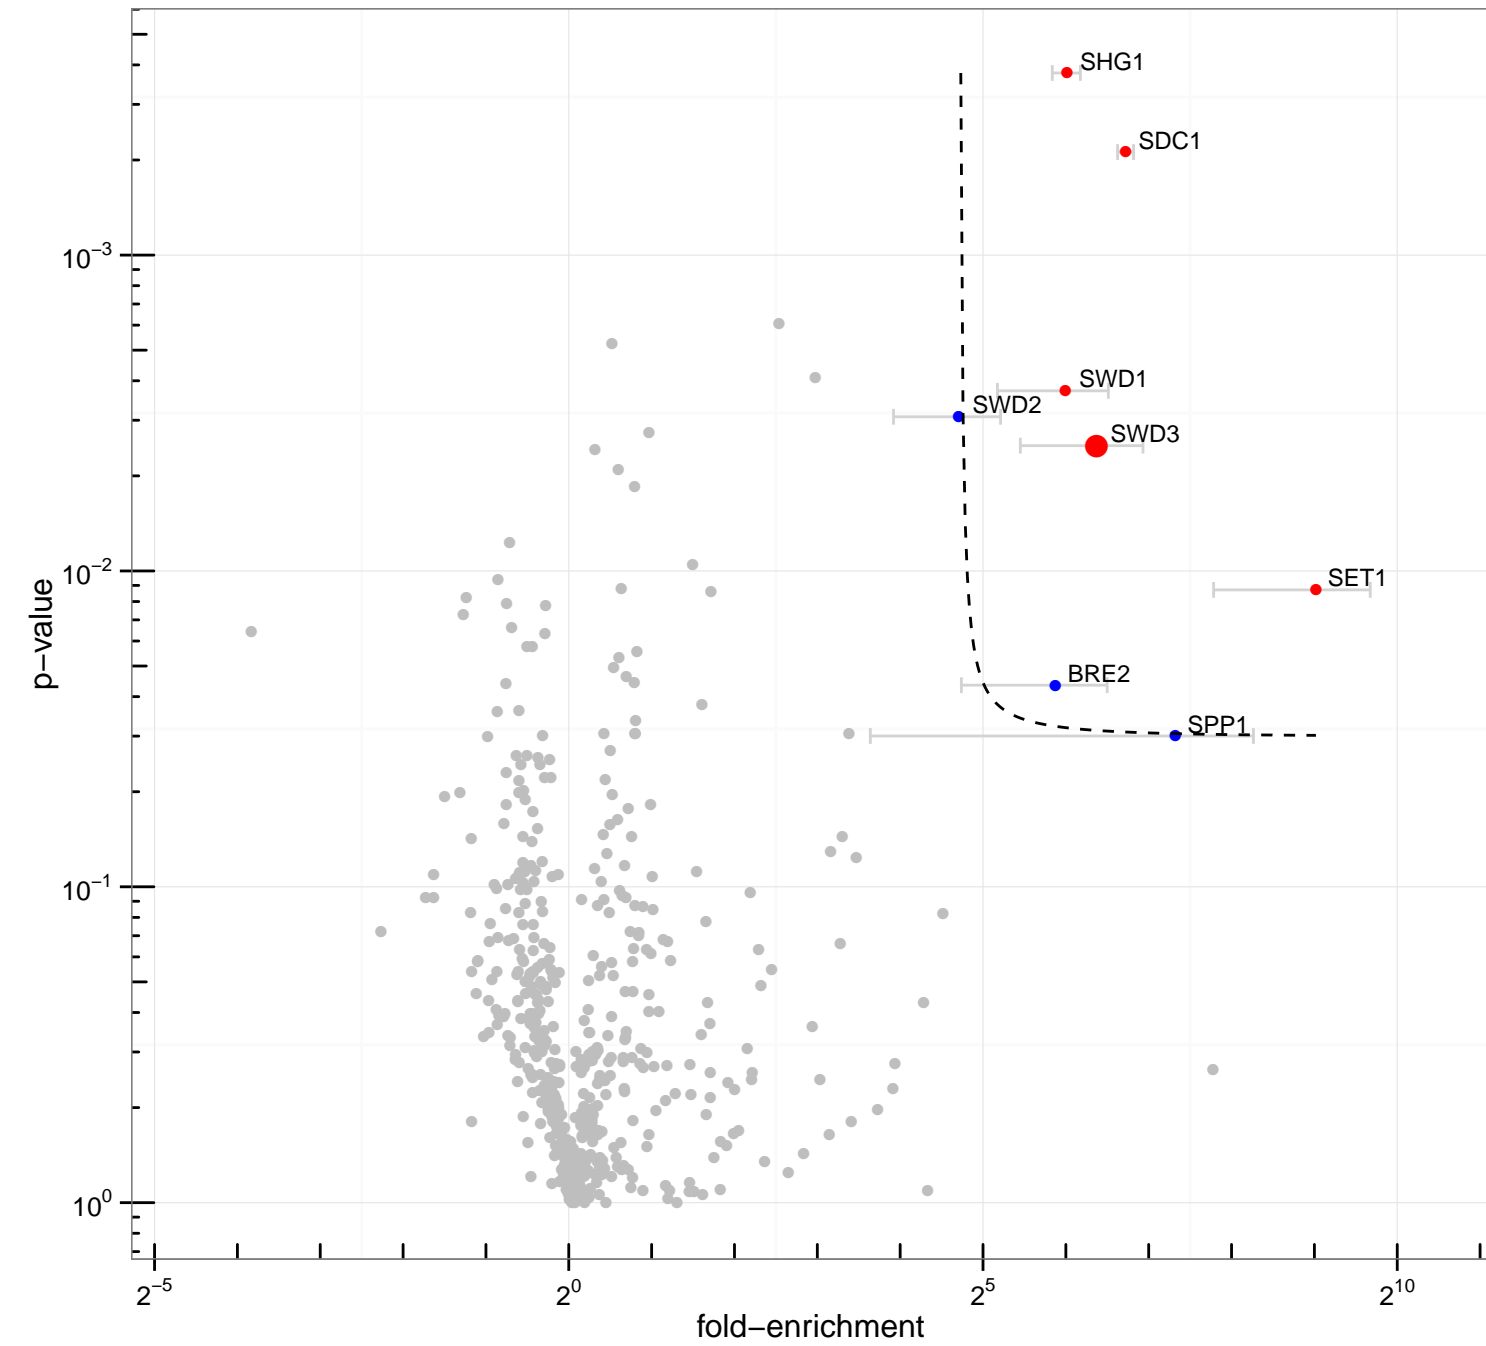

**Interactor class**

- A+
- B+

|                         | BRE2 | SDC1 | SET1 | SHG1 | SPP1 | SWD1 | SWD2 | SWD3 |
|-------------------------|------|------|------|------|------|------|------|------|
| <i>significance</i>     | 5.1  | 6.6  | 8.2  | 6.2  | 6.5  | 5.6  | 4.5  | 5.9  |
| <i>interactor class</i> | B+   | A+   | A+   | A+   | B+   | A+   | B+   | A+   |





|                   |            |
|-------------------|------------|
| <b>bait</b>       | YNG1       |
| <b>experiment</b> | 27 minutes |

|                    |       |
|--------------------|-------|
| <b>interactors</b> | 5     |
| <b>recovery</b>    | NaN % |

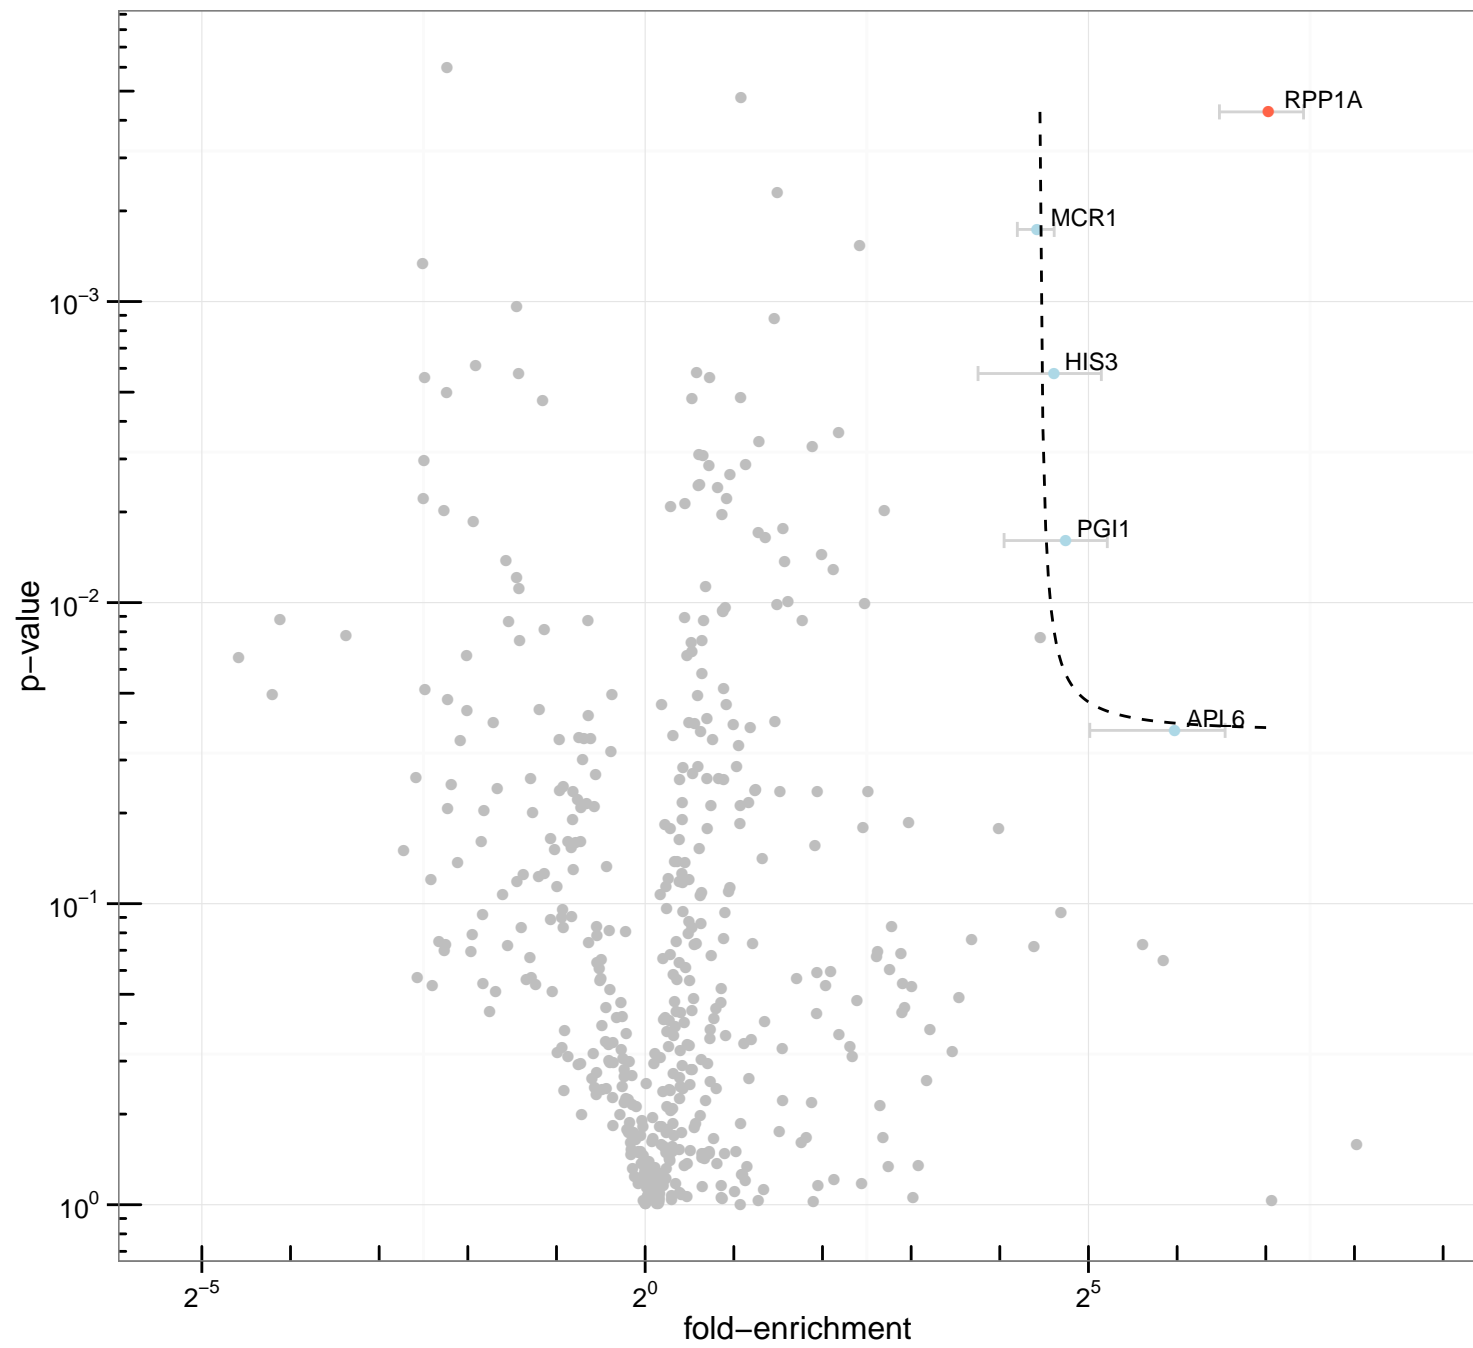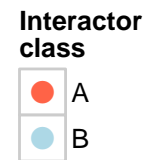

|                         |              |
|-------------------------|--------------|
|                         | <b>RPP1A</b> |
| <i>significance</i>     | 7            |
| <i>interactor class</i> | A            |

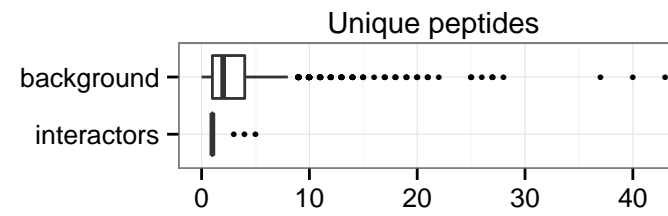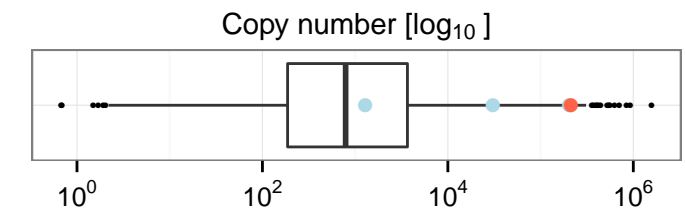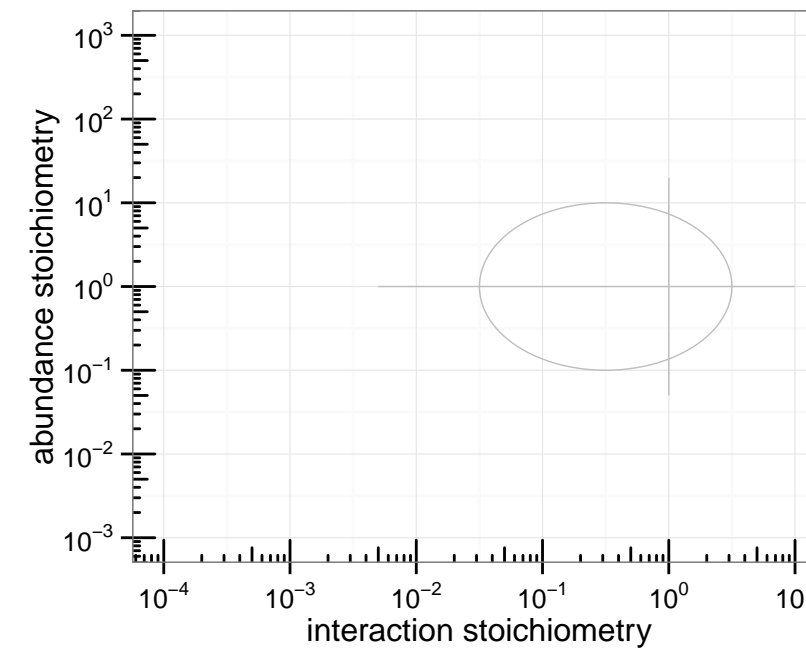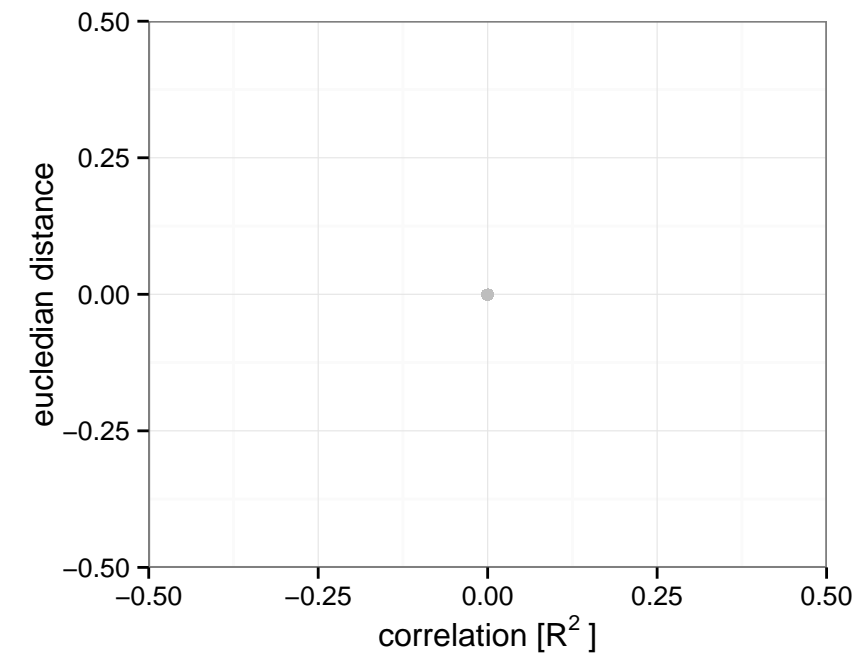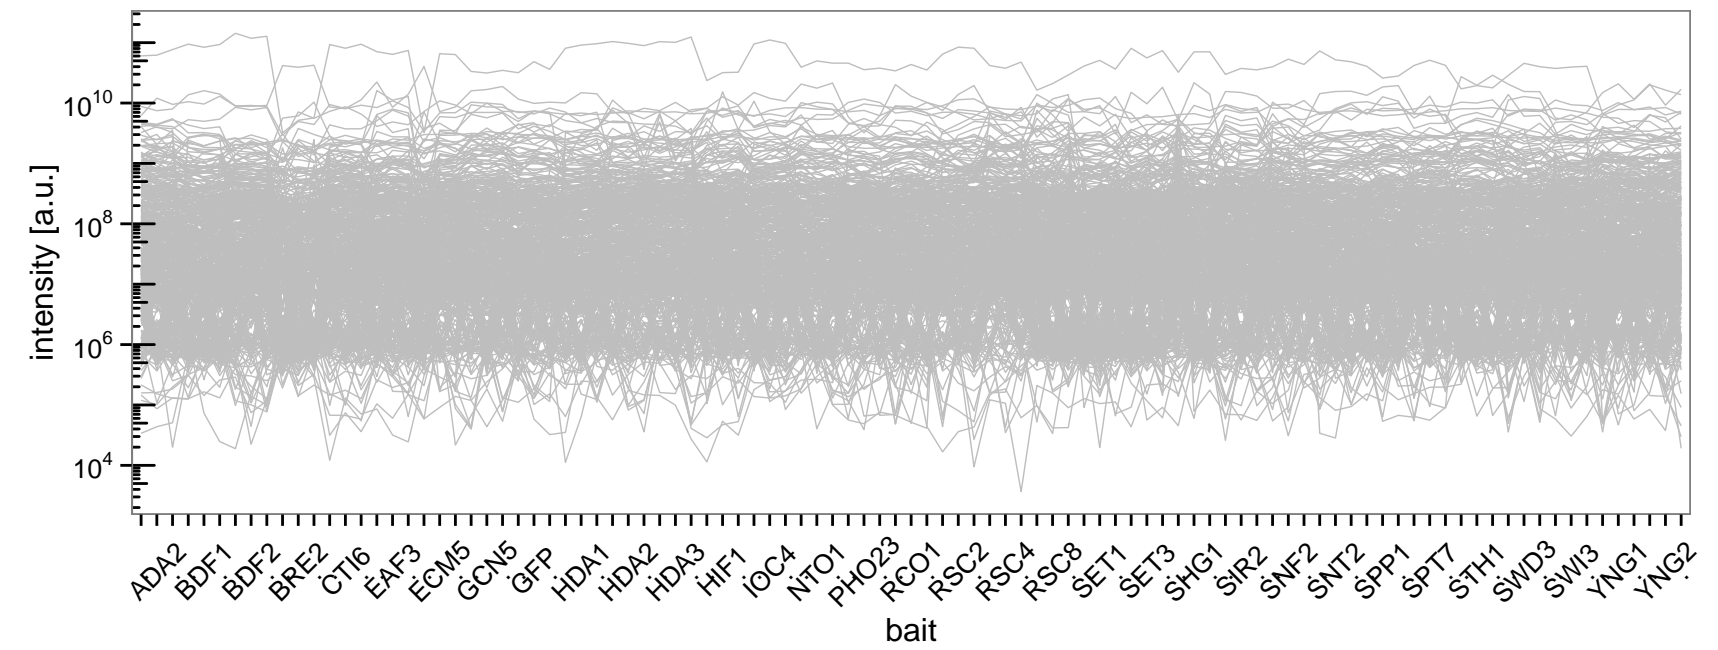

|                   |            |
|-------------------|------------|
| <b>bait</b>       | YNG2       |
| <b>experiment</b> | 27 minutes |

|                    |      |
|--------------------|------|
| <b>interactors</b> | 15   |
| <b>recovery</b>    | 69 % |

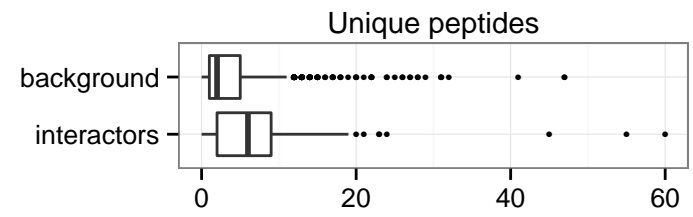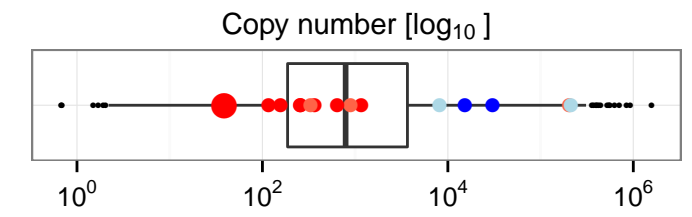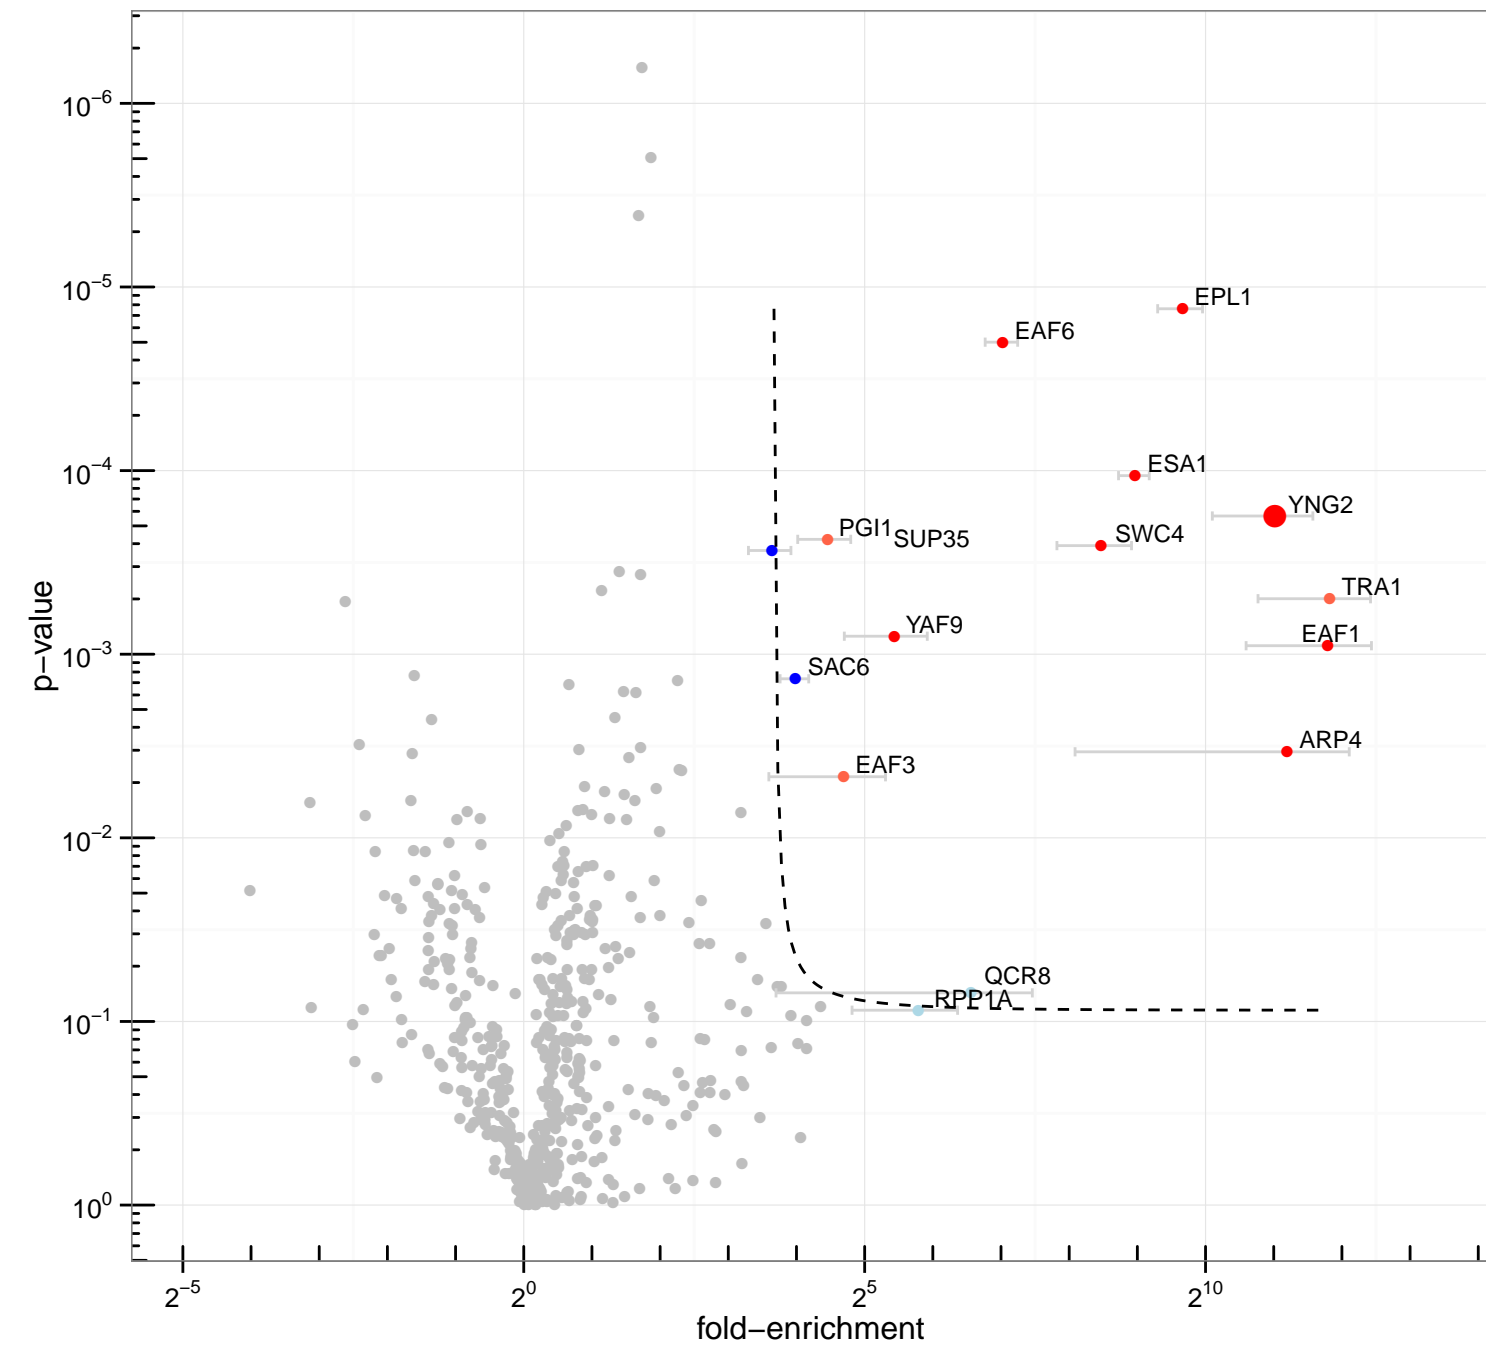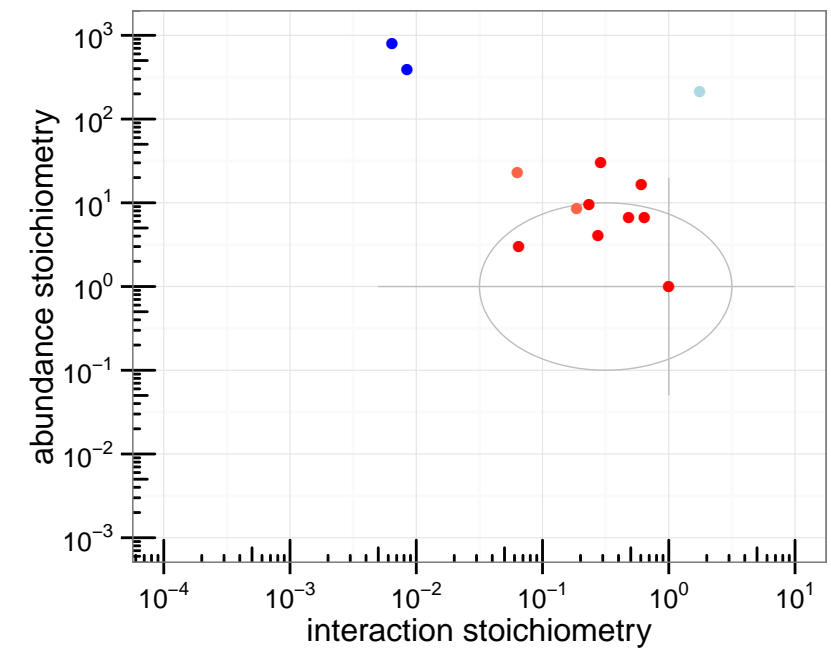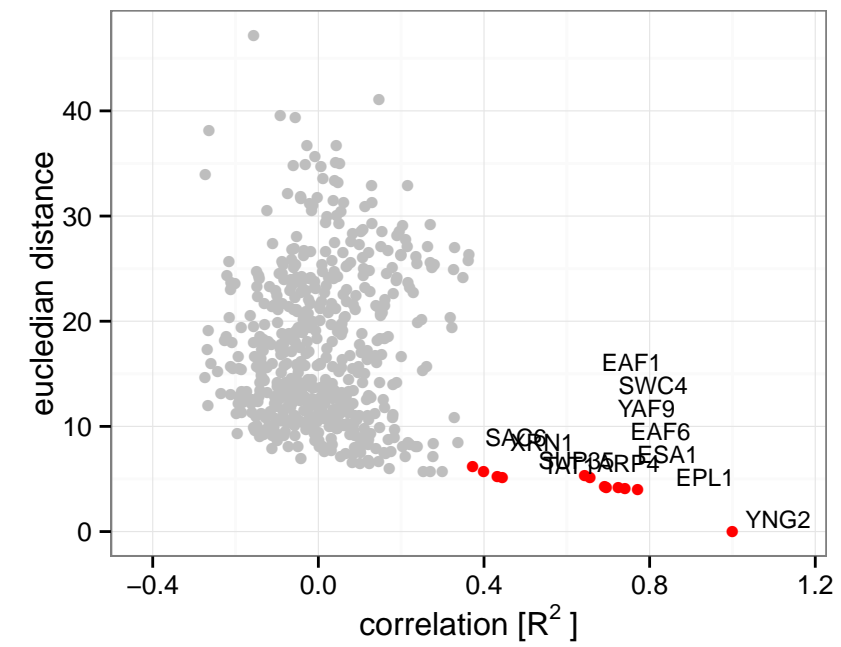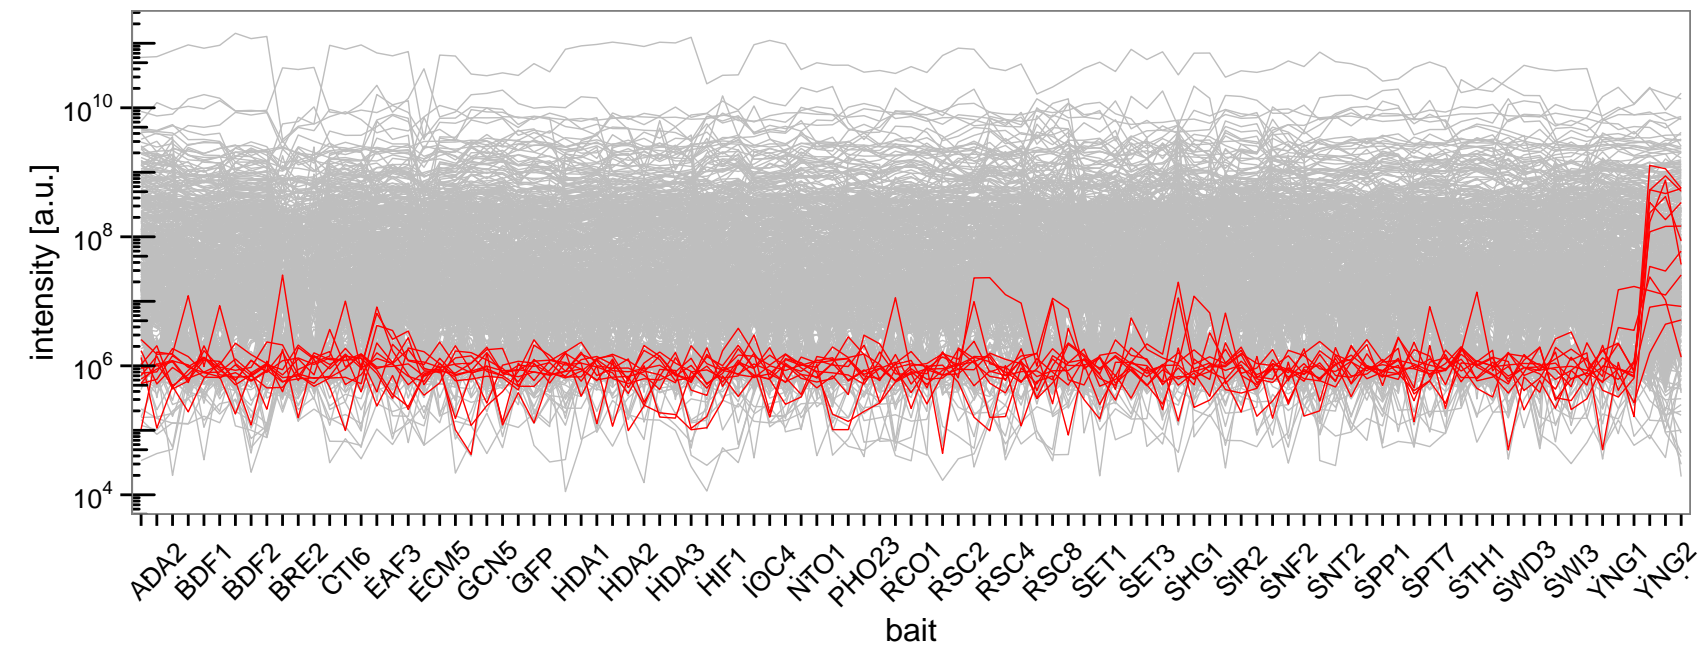

|                         | ARP4 | EAF1 | EAF3 | EAF6 | EPL1 | ESA1 | PGI1 | SAC6 | SUP35 | SWC4 | TRA1 | YAF9 | YNG2 |
|-------------------------|------|------|------|------|------|------|------|------|-------|------|------|------|------|
| <i>significance</i>     | 10.0 | 11.0 | 4.4  | 7.6  | 9.9  | 8.9  | 5.0  | 4.1  | 4.4   | 8.3  | 11.0 | 5.4  | 11.0 |
| <i>interactor class</i> | A+   | A+   | A    | A+   | A+   | A+   | A    | B+   | B+    | A+   | A    | A+   | A+   |
